# Supplementary material for: Sex differences in transcriptomic profiles in aged kidney cells of renin lineage
Source: Aging (Albany NY). 2018 Apr 18;10(4):606–21. doi: 10.18632/aging.101416 (PMC5940125; doi:10.18632/aging.101416)
Supplement: Supplementary Table S1 [file aging-10-101416-s001.xlsx]

## Sheet: up_aged
Table S1 Differentially expressed genes, aged vs. young mice CoRL, adjusted for sex, up in aged/down in young
gene.id	gene.symbol	gene.name	logFC_aged_vs_young	pval	padj
ENSMUSG00000088025	Rprl3	ribonuclease P RNA-like 3	11.4663	0	0
ENSMUSG00000080811	Gm14513	predicted gene 14513	2.92801	4.97313e-12	2.18679e-08
ENSMUSG00000079457	Gm7609	predicted pseudogene 7609	3.76765	5.19378e-09	9.51587e-06
ENSMUSG00000073418	C4b	complement component 4B (Chido blood group)	2.65482	3.95975e-07	0.000483661
ENSMUSG00000085666	Gm9855	predicted pseudogene 9855	2.49225	4.89982e-07	0.000566987
ENSMUSG00000021876	Rnase4	ribonuclease, RNase A family 4	1.51282	5.6693e-07	0.000623226
ENSMUSG00000027962	Vcam1	vascular cell adhesion molecule 1	1.36809	7.6329e-07	0.000799128
ENSMUSG00000021508	Cxcl14	chemokine (C-X-C motif) ligand 14	2.67411	1.2773e-06	0.00117011
ENSMUSG00000090186	Gm7592	predicted gene 7592	3.38119	1.91236e-06	0.0015022
ENSMUSG00000035916	Ptprq	protein tyrosine phosphatase, receptor type, Q	8.9939	3.17954e-06	0.00218455
ENSMUSG00000061684	Rpl21-ps8	ribosomal protein L21, pseudogene 8	1.35581	4.57732e-06	0.0030496
ENSMUSG00000060639	Hist1h4i	histone cluster 1, H4i	1.6065	6.72698e-06	0.00389209
ENSMUSG00000024679	Ms4a6d	membrane-spanning 4-domains, subfamily A, member 6D	1.57649	9.1478e-06	0.00478866
ENSMUSG00000021136	Smoc1	SPARC related modular calcium binding 1	1.87738	1.57408e-05	0.00736336
ENSMUSG00000083596	Rpl21-ps15	ribosomal protein L21, pseudogene 15	1.38699	2.08434e-05	0.0093523

## Sheet: up_young
Table S1 Differentially expressed genes, aged vs. young mice CoRL, adjusted for sex, up in young/down in aged
gene.id	gene.symbol	gene.name	logFC_aged_vs_young	pval	padj
ENSMUSG00000031461	Myom2	myomesin 2	-2.82274	0	0
ENSMUSG00000006649	Nphs1	nephrosis 1, nephrin	-2.9396	3.21965e-15	1.76968e-11
ENSMUSG00000038765	Lmx1b	LIM homeobox transcription factor 1 beta	-3.79281	1.01453e-11	3.71759e-08
ENSMUSG00000031465	Angpt2	angiopoietin 2	-1.71348	2.71282e-10	8.52059e-07
ENSMUSG00000026535	Ifi202b	interferon activated gene 202B	-4.49696	5.54744e-10	1.52458e-06
ENSMUSG00000059213	Ddn	dendrin	-2.47714	8.59777e-10	1.89031e-06
ENSMUSG00000024552	Slc14a2	solute carrier family 14 (urea transporter), member 2	-1.56579	8.10969e-10	1.89031e-06
ENSMUSG00000074796	Slc4a11	solute carrier family 4, sodium bicarbonate transporter-like, member 11	-1.66179	5.00477e-09	9.51587e-06
ENSMUSG00000059336	Slc14a1	solute carrier family 14 (urea transporter), member 1	-1.73779	1.18342e-08	2.00143e-05
ENSMUSG00000029082	Bst1	bone marrow stromal cell antigen 1	-1.54163	8.41627e-08	0.00012336
ENSMUSG00000026602	Nphs2	nephrosis 2, podocin	-2.52783	1.07452e-07	0.000147653
ENSMUSG00000022665	Ccdc80	coiled-coil domain containing 80	-1.56714	2.93489e-07	0.000379568
ENSMUSG00000026073	Il1r2	interleukin 1 receptor, type II	-1.8997	9.48404e-07	0.0009478
ENSMUSG00000024043	Arhgap28	Rho GTPase activating protein 28	-2.03559	1.15281e-06	0.00110198
ENSMUSG00000023013	Aqp2	aquaporin 2	-1.29365	1.43258e-06	0.00125987
ENSMUSG00000033460	Armcx1	armadillo repeat containing, X-linked 1	-1.53146	1.91311e-06	0.0015022
ENSMUSG00000016458	Wt1	Wilms tumor 1 homolog	-2.15442	1.79282e-06	0.0015022
ENSMUSG00000018486	Wnt9b	wingless-type MMTV integration site family, member 9B	-1.76544	2.15316e-06	0.0016324
ENSMUSG00000039639	Kcne1	potassium voltage-gated channel, Isk-related subfamily, member 1	-1.77856	2.92697e-06	0.00210719
ENSMUSG00000050640	Tmem150c	transmembrane protein 150C	-1.50314	2.97112e-06	0.00210719
ENSMUSG00000030268	Bcat1	branched chain aminotransferase 1, cytosolic	-1.44357	4.82615e-06	0.00312082
ENSMUSG00000089804	Gm16136	predicted gene 16136	-1.78603	5.63912e-06	0.00352245
ENSMUSG00000022123	Scel	sciellin	-1.28644	5.76768e-06	0.00352245
ENSMUSG00000026494	Kif26b	kinesin family member 26B	-1.57298	6.23491e-06	0.00370489
ENSMUSG00000026065	Slc9a4	solute carrier family 9 (sodium/hydrogen exchanger), member 4	-1.76576	7.61274e-06	0.00429163
ENSMUSG00000066842	Hmcn1	hemicentin 1	-1.68081	7.84175e-06	0.00431022
ENSMUSG00000061808	Ttr	transthyretin	-1.41144	8.93525e-06	0.00478866
ENSMUSG00000050074	Spink8	serine peptidase inhibitor, Kazal type 8	-1.54996	1.03227e-05	0.00527802
ENSMUSG00000052430	Bmpr1b	bone morphogenetic protein receptor, type 1B	-1.33169	1.11805e-05	0.00558668
ENSMUSG00000061991	Hist1h2af	histone cluster 1, H2af	-1.58707	1.29149e-05	0.00630993
ENSMUSG00000049907	Rasl11b	RAS-like, family 11, member B	-1.32826	1.34912e-05	0.00644823
ENSMUSG00000092837	Rpph1	ribonuclease P RNA component H1	-1.05144	1.78647e-05	0.00818277
ENSMUSG00000022330	Osr2	odd-skipped related 2	-1.19041	2.21977e-05	0.00976078
