# Supplementary material for: Sex differences in transcriptomic profiles in aged kidney cells of renin lineage
Source: Aging (Albany NY). 2018 Apr 18;10(4):606–21. doi: 10.18632/aging.101416 (PMC5940125; doi:10.18632/aging.101416)
Supplement: Supplementary Table S2 [file aging-10-101416-s002.xlsx]

## Sheet: up_aged_female
Table S2 Differentially expressed genes, aged female vs. young female mice CoRL, up in aged/down in young
gene.id	gene.symbol	gene.name	Aged	Young	foldChange	log2FoldChange	pval	padj
ENSMUSG00000088025	Rprl3	ribonuclease P RNA-like 3	1487.25	0	1488.25	10.5394	6.35234e-67	1.27282e-62
ENSMUSG00000073418	C4b	complement component 4B (Chido blood group)	508.354	57.8001	8.66246	3.11478	4.26147e-14	1.70774e-10
ENSMUSG00000030218	Mgp	matrix Gla protein	4339.61	933.493	4.64489	2.21564	3.38793e-12	1.1314e-08
ENSMUSG00000027962	Vcam1	vascular cell adhesion molecule 1	2615.4	512.973	5.09053	2.34782	8.75324e-11	2.50555e-07
ENSMUSG00000030862	Cpxm2	carboxypeptidase X 2 (M14 family)	180.851	13.8005	12.2868	3.61903	4.03073e-10	8.97375e-07
ENSMUSG00000062515	Fabp4	fatty acid binding protein 4, adipocyte	2024.5	552.002	3.66273	1.87292	9.99213e-09	1.82011e-05
ENSMUSG00000063415	Cyp26b1	cytochrome P450, family 26, subfamily b, polypeptide 1	3022.8	62.0863	47.9311	5.58289	1.21724e-08	2.03248e-05
ENSMUSG00000031375	Bgn	biglycan	6941.22	1157.09	5.99453	2.58365	3.42977e-08	4.90873e-05
ENSMUSG00000024087	Cyp1b1	cytochrome P450, family 1, subfamily b, polypeptide 1	438.4	92.2517	4.71198	2.23633	5.72902e-08	7.65282e-05
ENSMUSG00000031380	Vegfd	vascular endothelial growth factor D	354.205	72.9172	4.80545	2.26467	1.63363e-07	0.000204581
ENSMUSG00000025780	Itih5	inter-alpha (globulin) inhibitor H5	287.849	53.5155	5.29848	2.40558	2.04229e-07	0.000240714
ENSMUSG00000072812	Ahnak2	AHNAK nucleoprotein 2	300.121	58.2843	5.07927	2.34462	2.46481e-07	0.000274374
ENSMUSG00000062980	Cped1	cadherin-like and PC-esterase domain containing 1	795.66	235.633	3.36665	1.75131	5.76067e-07	0.000577133
ENSMUSG00000037849	Ifi206	interferon activated gene 206	278.569	60.4435	4.55002	2.18587	1.18159e-06	0.00107616
ENSMUSG00000014602	Kif1a	kinesin family member 1A	364.051	33.4612	10.5931	3.40505	1.30344e-06	0.00113553
ENSMUSG00000001494	Sost	sclerostin	218.509	40.2884	5.3165	2.41048	1.3828e-06	0.00115447
ENSMUSG00000027435	Cd93	CD93 antigen	5581.43	2008.95	2.7774	1.47373	2.0791e-06	0.00160227
ENSMUSG00000048120	Entpd1	ectonucleoside triphosphate diphosphohydrolase 1	1659.09	578.186	2.86625	1.51917	3.20384e-06	0.00237761
ENSMUSG00000073411	H2-D1	histocompatibility 2, D region locus 1	9215.82	3014.82	3.05616	1.61172	4.47051e-06	0.0027899
ENSMUSG00000024164	C3	complement component 3	3672.55	1371.06	2.67739	1.42083	4.57242e-06	0.0027899
ENSMUSG00000076609	Igkc	immunoglobulin kappa constant	2854.06	505.505	5.63678	2.49487	4.05102e-06	0.0027899
ENSMUSG00000021903	Galnt15	UDP-N-acetyl-alpha-D-galactosamine:polypeptide N-acetylgalactosaminyltransferase 15	762.688	249.412	3.04973	1.60868	5.31987e-06	0.00313512
ENSMUSG00000041445	Mmrn2	multimerin 2	4347.84	1702.81	2.55241	1.35186	1.00977e-05	0.0057808
ENSMUSG00000020357	Flt4	FMS-like tyrosine kinase 4	1532.21	552.004	2.77251	1.47119	1.09482e-05	0.00609357
ENSMUSG00000041577	Prelp	proline arginine-rich end leucine-rich repeat	424.93	121.709	3.47106	1.79537	1.16412e-05	0.00630291
ENSMUSG00000048330	Ric3	RIC3 acetylcholine receptor chaperone	328.176	88.5624	3.67538	1.87789	1.19534e-05	0.00630291
ENSMUSG00000040249	Lrp1	low density lipoprotein receptor-related protein 1	6061.29	2423.8	2.50012	1.322	1.40899e-05	0.00688585
ENSMUSG00000002602	Axl	AXL receptor tyrosine kinase	2558.14	972.962	2.62755	1.39372	1.46023e-05	0.00696634
ENSMUSG00000000957	Mmp14	matrix metallopeptidase 14 (membrane-inserted)	944.238	329.011	2.86426	1.51816	1.55118e-05	0.00722812
ENSMUSG00000071714	Csf2rb2	colony stimulating factor 2 receptor, beta 2, low-affinity (granulocyte-macrophage)	673.456	175.832	3.81411	1.93135	1.60564e-05	0.00731187
ENSMUSG00000090186	Gm7592	predicted gene 7592	63.2901	3.57667	14.0474	3.81223	1.69158e-05	0.00753206
ENSMUSG00000030653	Pde2a	phosphodiesterase 2A, cGMP-stimulated	2591.81	997.932	2.59559	1.37606	1.81901e-05	0.00792335
ENSMUSG00000034684	Sema3f	sema domain, immunoglobulin domain (Ig), short basic domain, secreted, (semaphorin) 3F	1091.7	403.018	2.70458	1.4354	2.11442e-05	0.00879
ENSMUSG00000029231	Pdgfra	platelet derived growth factor receptor, alpha polypeptide	501.084	168.981	2.95376	1.56255	3.14406e-05	0.0118863
ENSMUSG00000029070	Mxra8	matrix-remodelling associated 8	468.387	149.423	3.12045	1.64175	3.50147e-05	0.0129284
ENSMUSG00000040987	Mill2	MHC I like leukocyte 2	173.223	39.456	4.30648	2.10651	5.48021e-05	0.0171454
ENSMUSG00000042961	Egflam	EGF-like, fibronectin type III and laminin G domains	222.106	58.4979	3.74982	1.90682	6.10636e-05	0.0182617
ENSMUSG00000017466	Timp2	tissue inhibitor of metalloproteinase 2	2239.75	914.745	2.44691	1.29096	6.54652e-05	0.0192901
ENSMUSG00000031740	Mmp2	matrix metallopeptidase 2	337.529	99.6757	3.36257	1.74956	6.83112e-05	0.0195536
ENSMUSG00000005397	Nid1	nidogen 1	1813.59	748.529	2.42097	1.27559	8.04959e-05	0.0217959
ENSMUSG00000031825	Crispld2	cysteine-rich secretory protein LCCL domain containing 2	303.243	93.9047	3.20577	1.68067	7.9671e-05	0.0217959
ENSMUSG00000024679	Ms4a6d	membrane-spanning 4-domains, subfamily A, member 6D	209.985	50.8384	4.07004	2.02504	8.83471e-05	0.0236028
ENSMUSG00000068735	Trp53i11	transformation related protein 53 inducible protein 11	669.847	256.824	2.60196	1.3796	0.000113873	0.0292523
ENSMUSG00000032334	Loxl1	lysyl oxidase-like 1	377.95	125.713	2.99062	1.58044	0.000116359	0.0295124
ENSMUSG00000022623	Shank3	SH3/ankyrin domain gene 3	3419.67	1499.83	2.27918	1.18851	0.000121688	0.0304782
ENSMUSG00000026365	Cfh	complement component factor h	3581.93	918.278	3.89755	1.96257	0.000123883	0.0306449
ENSMUSG00000024066	Xdh	xanthine dehydrogenase	2184.51	822.186	2.65494	1.40868	0.000153106	0.0360916
ENSMUSG00000032028	Nxpe2	neurexophilin and PC-esterase domain family, member 2	114.739	22.2924	4.96897	2.31295	0.000155149	0.036148
ENSMUSG00000033788	Dysf	dysferlin	2618.01	1134.97	2.30553	1.2051	0.000158641	0.0364736
ENSMUSG00000045333	Zfp423	zinc finger protein 423	286.063	92.9261	3.05626	1.61177	0.000160188	0.0364736
ENSMUSG00000026121	Sema4c	sema domain, immunoglobulin domain (Ig), transmembrane domain (TM) and short cytoplasmic domain, (semaphorin) 4C	798.804	319.81	2.49308	1.31793	0.000166582	0.0371103
ENSMUSG00000036103	Colec12	collectin sub-family member 12	297.998	94.2427	3.13933	1.65046	0.000166688	0.0371103
ENSMUSG00000022579	Gpihbp1	GPI-anchored HDL-binding protein 1	534.899	201.228	2.64997	1.40598	0.000183395	0.0399422
ENSMUSG00000020473	Aebp1	AE binding protein 1	3005.4	1359.59	2.20963	1.14381	0.000189335	0.0404498
ENSMUSG00000069793	Slfn9	schlafen 9	276.802	88.0563	3.1194	1.64127	0.000191205	0.0404498
ENSMUSG00000029426	Scarb2	scavenger receptor class B, member 2	1922.59	851.723	2.25582	1.17365	0.000209629	0.0428607
ENSMUSG00000087259	2610035D17Rik	RIKEN cDNA 2610035D17 gene	77.1223	10.1902	6.98131	2.8035	0.000220967	0.0441968
ENSMUSG00000029816	Gpnmb	glycoprotein (transmembrane) nmb	80.3105	8.09834	8.93684	3.15976	0.000220102	0.0441968
ENSMUSG00000001930	Vwf	Von Willebrand factor	663.03	208.64	3.16747	1.66333	0.000224987	0.0441968
ENSMUSG00000079457	Gm7609	predicted pseudogene 7609	66.2393	8.01934	7.45501	2.89821	0.000240427	0.0458803
ENSMUSG00000058624	Gda	guanine deaminase	519.291	204.062	2.53724	1.34326	0.000250735	0.0468675
ENSMUSG00000060924	Csmd1	CUB and Sushi multiple domains 1	138.855	18.6484	7.11787	2.83145	0.000250449	0.0468675
ENSMUSG00000025969	Nrp2	neuropilin 2	1477.55	650.777	2.26849	1.18173	0.000265887	0.0481516
ENSMUSG00000055540	Epha6	Eph receptor A6	163.977	45.2255	3.56896	1.8355	0.000266748	0.0481516
ENSMUSG00000039167	Adgrl4	adhesion G protein-coupled receptor L4	4724	1631.75	2.89389	1.53301	0.000263506	0.0481516
ENSMUSG00000035258	Abi3bp	ABI gene family, member 3 (NESH) binding protein	294.466	96.6271	3.02648	1.59764	0.000277365	0.0496211
ENSMUSG00000021876	Rnase4	ribonuclease, RNase A family 4	391.244	79.7897	4.85512	2.27951	0.000287097	0.0504612
ENSMUSG00000022661	Cd200	CD200 antigen	1465.76	633.154	2.31294	1.20973	0.00028702	0.0504612
ENSMUSG00000030123	Plxnd1	plexin D1	5287.08	2435.24	2.17059	1.11809	0.000298088	0.0519373
ENSMUSG00000039126	Prune2	prune homolog 2	292.194	63.7174	4.53038	2.17963	0.000309604	0.0534788
ENSMUSG00000001739	Cldn15	claudin 15	454.513	179.812	2.51926	1.333	0.000337231	0.0572635
ENSMUSG00000030249	Abcc9	ATP-binding cassette, sub-family C (CFTR/MRP), member 9	377.168	134.07	2.79979	1.48532	0.000354793	0.0582703
ENSMUSG00000031762	Mt2	metallothionein 2	816.178	361.951	2.25148	1.17087	0.00036435	0.0591072
ENSMUSG00000018217	Pmp22	peripheral myelin protein 22	630.217	255.396	2.46188	1.29976	0.000378031	0.0604385
ENSMUSG00000020814	Mxra7	matrix-remodelling associated 7	329.828	112.318	2.91947	1.54571	0.000380059	0.0604385
ENSMUSG00000026582	Sele	selectin, endothelial cell	236.574	77.3935	3.03053	1.59957	0.000420831	0.0658766
ENSMUSG00000020695	Mrc2	mannose receptor, C type 2	316	115.185	2.72841	1.44806	0.00045262	0.0701704
ENSMUSG00000045930	Clec14a	C-type lectin domain family 14, member a	1584.5	710.84	2.22732	1.15531	0.000477673	0.0720839
ENSMUSG00000032125	Robo4	roundabout guidance receptor 4	1169.07	515.786	2.26413	1.17896	0.000494927	0.0720839
ENSMUSG00000048376	F2r	coagulation factor II (thrombin) receptor	1586.65	716.88	2.21158	1.14508	0.000555538	0.0783759
ENSMUSG00000027408	Cpxm1	carboxypeptidase X 1 (M14 family)	79.5433	12.7209	5.8701	2.55338	0.000559353	0.0783759
ENSMUSG00000017491	Rarb	retinoic acid receptor, beta	291.108	100.283	2.88409	1.52811	0.000583091	0.0794788
ENSMUSG00000006219	Fblim1	filamin binding LIM protein 1	230.189	71.5232	3.18779	1.67256	0.00058217	0.0794788
ENSMUSG00000001131	Timp1	tissue inhibitor of metalloproteinase 1	37.5142	2.05823	12.5936	3.65462	0.00057598	0.0794788
ENSMUSG00000079455	Gm16026	predicted pseudogene 16026	59.3242	6.07376	8.52789	3.09219	0.000607335	0.0816723
ENSMUSG00000025909	Sntg1	syntrophin, gamma 1	44.2699	2.7443	12.0903	3.59578	0.000630501	0.0828242
ENSMUSG00000020057	Dram1	DNA-damage regulated autophagy modulator 1	592.697	249.063	2.37419	1.24743	0.000632435	0.0828242
ENSMUSG00000041828	Abca8a	ATP-binding cassette, sub-family A (ABC1), member 8a	275.834	97.3805	2.81391	1.49258	0.000630791	0.0828242
ENSMUSG00000022687	Boc	biregional cell adhesion molecule-related/down-regulated by oncogenes (Cdon) binding protein	801.072	350.707	2.28051	1.18936	0.000665119	0.0859805
ENSMUSG00000036446	Lum	lumican	426.783	101.936	4.15583	2.05514	0.000678674	0.0871705
ENSMUSG00000026814	Eng	endoglin	5917.57	2871.06	2.06074	1.04316	0.000686729	0.0876432
ENSMUSG00000019929	Dcn	decorin	1554.04	479.334	3.23742	1.69485	0.000717461	0.0909451
ENSMUSG00000027074	Slc43a3	solute carrier family 43, member 3	1052.8	470.223	2.2363	1.16111	0.000725832	0.0909451
ENSMUSG00000001288	Rarg	retinoic acid receptor, gamma	845.044	374.664	2.25213	1.17129	0.000742523	0.0924095
ENSMUSG00000016494	Cd34	CD34 antigen	1559.58	711.527	2.1902	1.13106	0.000791211	0.0967699
ENSMUSG00000017754	Pltp	phospholipid transfer protein	714.295	315.221	2.26201	1.17761	0.000854984	0.10337
ENSMUSG00000042804	Gpr153	G protein-coupled receptor 153	142.169	40.322	3.46471	1.79274	0.000890141	0.105647
ENSMUSG00000034457	Eda2r	ectodysplasin A2 receptor	83.9787	16.1513	4.95464	2.30878	0.000915055	0.107853
ENSMUSG00000074743	Thbd	thrombomodulin	2786.73	1372.3	2.02996	1.02145	0.000933179	0.10871
ENSMUSG00000021759	Plpp1	phospholipid phosphatase 1	3318.43	1636.13	2.02759	1.01977	0.000943882	0.109321
ENSMUSG00000017697	Ada	adenosine deaminase	226.431	77.2926	2.90488	1.53848	0.000977149	0.111245
ENSMUSG00000045092	S1pr1	sphingosine-1-phosphate receptor 1	1487.69	717.191	2.07283	1.0516	0.000973759	0.111245
ENSMUSG00000019194	Scn1b	sodium channel, voltage-gated, type I, beta	251.599	93.1397	2.68323	1.42397	0.000966987	0.111245
ENSMUSG00000028439	Fam219a	family with sequence similarity 219, member A	353.455	141.313	2.49068	1.31654	0.00107115	0.121258
ENSMUSG00000029084	Cd38	CD38 antigen	497.192	216.456	2.291	1.19597	0.0010931	0.12236
ENSMUSG00000020717	Pecam1	platelet/endothelial cell adhesion molecule 1	6438.51	3026.2	2.12722	1.08897	0.00113705	0.125873
ENSMUSG00000078945	Naip2	NLR family, apoptosis inhibitory protein 2	366.524	147.893	2.46838	1.30357	0.0011533	0.125956
ENSMUSG00000033191	Tie1	tyrosine kinase with immunoglobulin-like and EGF-like domains 1	2449.81	1188.89	2.05969	1.04243	0.00116294	0.125956
ENSMUSG00000048583	Igf2	insulin-like growth factor 2	1400.17	547.44	2.55482	1.35322	0.00116008	0.125956
ENSMUSG00000022610	Mapk12	mitogen-activated protein kinase 12	259.048	96.2555	2.67387	1.41893	0.00117539	0.12662
ENSMUSG00000037035	Inhbb	inhibin beta-B	363.227	59.2176	6.04851	2.59658	0.0012165	0.129654
ENSMUSG00000019899	Lama2	laminin, alpha 2	508.115	214.467	2.36284	1.24052	0.00125108	0.131528
ENSMUSG00000002020	Ltbp2	latent transforming growth factor beta binding protein 2	224.8	29.592	7.38101	2.88382	0.00128315	0.131528
ENSMUSG00000029163	Emilin1	elastin microfibril interfacer 1	1144.97	320.676	3.56251	1.83289	0.00128163	0.131528
ENSMUSG00000070469	Adamtsl3	ADAMTS-like 3	102.324	23.2374	4.263	2.09187	0.00125535	0.131528
ENSMUSG00000003617	Cp	ceruloplasmin	1400.75	671.327	2.08492	1.05999	0.00133053	0.134645
ENSMUSG00000030306	Tmtc1	transmembrane and tetratricopeptide repeat containing 1	1551.23	751.532	2.06267	1.04452	0.00132495	0.134645
ENSMUSG00000053541	Gm4759	predicted gene 4759	405.879	167.52	2.41443	1.27168	0.00136155	0.135728
ENSMUSG00000038007	Acer2	alkaline ceramidase 2	1574.09	776.961	2.02464	1.01767	0.00137855	0.136742
ENSMUSG00000020642	Rnf144a	ring finger protein 144A	652.256	287.283	2.26602	1.18016	0.00142155	0.139789
ENSMUSG00000049872	Fam26e	family with sequence similarity 26, member E	70.7816	12.5747	5.28791	2.4027	0.00148073	0.139831
ENSMUSG00000020598	Nrcam	neuronal cell adhesion molecule	118.883	33.5622	3.46863	1.79436	0.00149207	0.139831
ENSMUSG00000023868	Pde10a	phosphodiesterase 10A	202.763	68.0474	2.95106	1.56124	0.00147999	0.139831
ENSMUSG00000012428	Steap4	STEAP family member 4	90.4116	19.5144	4.45597	2.15574	0.00147732	0.139831
ENSMUSG00000079227	Ccr5	chemokine (C-C motif) receptor 5	509.567	220.889	2.301	1.20226	0.0014361	0.139831
ENSMUSG00000061684	Rpl21-ps8	ribosomal protein L21, pseudogene 8	271.082	107.086	2.51726	1.33186	0.00150568	0.140322
ENSMUSG00000022799	Arhgap31	Rho GTPase activating protein 31	4169.02	2112.89	1.97267	0.980153	0.0016207	0.147246
ENSMUSG00000023224	Serping1	serine (or cysteine) peptidase inhibitor, clade G, member 1	1557.69	214.095	7.2465	2.85728	0.00162179	0.147246
ENSMUSG00000031538	Plat	plasminogen activator, tissue	5953.53	3045.36	1.95464	0.966901	0.00163066	0.147246
ENSMUSG00000050105	Grrp1	glycine/arginine rich protein 1	341.755	94.0174	3.60728	1.85091	0.00163956	0.147318
ENSMUSG00000011263	Exoc3l2	exocyst complex component 3-like 2	1168.06	469.774	2.48327	1.31224	0.00165545	0.148081
ENSMUSG00000026443	Lrrn2	leucine rich repeat protein 2, neuronal	35.657	2.38445	10.831	3.4371	0.00167977	0.148927
ENSMUSG00000020227	Irak3	interleukin-1 receptor-associated kinase 3	225.219	82.9948	2.69325	1.42935	0.00167433	0.148927
ENSMUSG00000038702	Dsel	dermatan sulfate epimerase-like	245.717	90.6996	2.69049	1.42787	0.00168739	0.148943
ENSMUSG00000016918	Sulf1	sulfatase 1	362.238	101.768	3.53456	1.82153	0.00177557	0.154683
ENSMUSG00000042190	Cmklr1	chemokine-like receptor 1	599.342	267.623	2.23489	1.1602	0.00182834	0.158591
ENSMUSG00000002233	Rhoc	ras homolog family member C	900.507	436.175	2.06212	1.04413	0.00191264	0.163079
ENSMUSG00000055301	Adh7	alcohol dehydrogenase 7 (class IV), mu or sigma polypeptide	60.3408	9.864	5.64625	2.49729	0.00203706	0.17078
ENSMUSG00000022159	Rab2b	RAB2B, member RAS oncogene family	223.156	84.187	2.63134	1.3958	0.00210861	0.175312
ENSMUSG00000029648	Flt1	FMS-like tyrosine kinase 1	8493.63	4423.17	1.92005	0.941144	0.00213848	0.177061
ENSMUSG00000021136	Smoc1	SPARC related modular calcium binding 1	98.228	15.4316	6.03885	2.59427	0.00215751	0.177902
ENSMUSG00000091345	Col6a5	collagen, type VI, alpha 5	21.1603	0	22.1603	4.4699	0.00220901	0.181401
ENSMUSG00000018387	Shroom1	shroom family member 1	39.0925	3.39674	9.1187	3.18883	0.00226954	0.184857
ENSMUSG00000022598	Psca	prostate stem cell antigen	39.0191	3.21681	9.49039	3.24647	0.00233793	0.188892
ENSMUSG00000031343	Gabra3	gamma-aminobutyric acid (GABA) A receptor, subunit alpha 3	98.5488	25.6891	3.72994	1.89915	0.00233789	0.188892
ENSMUSG00000038204	Asb10	ankyrin repeat and SOCS box-containing 10	33.8124	2.7443	9.29743	3.21683	0.00244402	0.192827
ENSMUSG00000025892	Gria4	glutamate receptor, ionotropic, AMPA4 (alpha 4)	122.958	30.9641	3.87803	1.95532	0.00243483	0.192827
ENSMUSG00000092212	Slc22a13b-ps	solute carrier family 22 (organic cation transporter), member 13b, pseudogene	38.4008	2.7443	10.5229	3.39545	0.00251945	0.197196
ENSMUSG00000059089	Fcgr4	Fc receptor, IgG, low affinity IV	219.193	84.187	2.58481	1.37006	0.00256547	0.199241
ENSMUSG00000026580	Selp	selectin, platelet	51.8914	7.29962	6.37275	2.67192	0.00267193	0.205124
ENSMUSG00000028041	Adam15	a disintegrin and metallopeptidase domain 15 (metargidin)	1476.14	762.676	1.93425	0.951772	0.00269386	0.206019
ENSMUSG00000043099	Hic1	hypermethylated in cancer 1	160.824	59.892	2.65756	1.4101	0.00282774	0.212207
ENSMUSG00000079057	Cyp4v3	cytochrome P450, family 4, subfamily v, polypeptide 3	360.368	157.464	2.28044	1.18931	0.00282624	0.212207
ENSMUSG00000001555	Fkbp10	FK506 binding protein 10	131.269	32.8088	3.91227	1.96801	0.00290746	0.215766
ENSMUSG00000027293	Ehd4	EH-domain containing 4	3518.06	1854.19	1.89688	0.923626	0.00290675	0.215766
ENSMUSG00000028001	Fga	fibrinogen alpha chain	204.472	75.2007	2.69645	1.43106	0.00312856	0.230467
ENSMUSG00000052477	C130026I21Rik	RIKEN cDNA C130026I21 gene	48.8835	7.15334	6.11817	2.6131	0.00314133	0.230559
ENSMUSG00000032925	Itgbl1	integrin, beta-like 1	111.574	20.2678	5.29317	2.40413	0.00327782	0.238828
ENSMUSG00000050345	4930486L24Rik	RIKEN cDNA 4930486L24 gene	50.3298	7.47955	6.05336	2.59774	0.00330325	0.239808
ENSMUSG00000029765	Plxna4	plexin A4	787.732	388.037	2.02739	1.01963	0.0033911	0.244415
ENSMUSG00000068373	D430041D05Rik	RIKEN cDNA D430041D05 gene	40.891	4.94882	7.0419	2.81596	0.00344475	0.246509
ENSMUSG00000033147	Slc22a15	solute carrier family 22 (organic anion/cation transporter), member 15	155.632	54.775	2.80829	1.48969	0.00348481	0.246732
ENSMUSG00000032690	Oas2	2'-5' oligoadenylate synthetase 2	462.751	214.556	2.15141	1.10529	0.00352245	0.248519
ENSMUSG00000022438	Parvb	parvin, beta	689.204	309.507	2.22283	1.1524	0.00355905	0.25022
ENSMUSG00000000693	Loxl3	lysyl oxidase-like 3	149.128	52.4242	2.81012	1.49063	0.00363397	0.252826
ENSMUSG00000023191	P3h3	prolyl 3-hydroxylase 3	250.743	105.714	2.35904	1.2382	0.00369344	0.256074
ENSMUSG00000016206	H2-M3	histocompatibility 2, M region locus 3	272.715	115.657	2.34632	1.2304	0.0038033	0.262782
ENSMUSG00000070003	Ssbp4	single stranded DNA binding protein 4	503.057	238.367	2.10579	1.07436	0.00382014	0.263038
ENSMUSG00000019846	Lama4	laminin, alpha 4	753.042	353.643	2.1262	1.08828	0.00384619	0.263925
ENSMUSG00000024810	Il33	interleukin 33	161.005	44.2585	3.57954	1.83977	0.00392678	0.268535
ENSMUSG00000024743	Syt7	synaptotagmin VII	400.502	103.859	3.82896	1.93695	0.00403918	0.272502
ENSMUSG00000018593	Sparc	secreted acidic cysteine rich glycoprotein	3662.15	1952.35	1.87532	0.907138	0.00413114	0.276842
ENSMUSG00000028475	5430416O09Rik	RIKEN cDNA 5430416O09 gene	184.772	69.8467	2.62217	1.39076	0.004279	0.285794
ENSMUSG00000008398	Elk3	ELK3, member of ETS oncogene family	1175.71	603.211	1.94752	0.961636	0.00443792	0.29025
ENSMUSG00000009569	Mkl2	MKL/myocardin-like 2	1759.94	935.652	1.88004	0.910763	0.00444396	0.29025
ENSMUSG00000027386	Fbln7	fibulin 7	354.342	154.237	2.28903	1.19473	0.00441516	0.29025
ENSMUSG00000057722	Lepr	leptin receptor	333.108	149.625	2.21815	1.14936	0.00444885	0.29025
ENSMUSG00000019539	Rcn3	reticulocalbin 3, EF-hand calcium binding domain	582.481	116.569	4.96289	2.31118	0.00438838	0.29025
ENSMUSG00000061947	Serpina10	serine (or cysteine) peptidase inhibitor, clade A (alpha-1 antiproteinase, antitrypsin), member 10	110.358	11.5287	8.88824	3.1519	0.00451177	0.292564
ENSMUSG00000055538	Zcchc24	zinc finger, CCHC domain containing 24	379.476	162.593	2.32575	1.2177	0.00475919	0.303694
ENSMUSG00000037185	Krt80	keratin 80	679.713	341.776	1.98588	0.989781	0.00475249	0.303694
ENSMUSG00000036545	Adamts2	a disintegrin-like and metallopeptidase (reprolysin type) with thrombospondin type 1 motif, 2	346.517	128.671	2.67999	1.42223	0.00510651	0.319747
ENSMUSG00000021294	Kif26a	kinesin family member 26A	440.63	214.072	2.05341	1.03802	0.00525803	0.32719
ENSMUSG00000035778	Ggta1	glycoprotein galactosyltransferase alpha 1, 3	672.09	344.182	1.94995	0.96344	0.00545051	0.338117
ENSMUSG00000028634	Hivep3	human immunodeficiency virus type I enhancer binding protein 3	393.329	183.885	2.13284	1.09278	0.00551935	0.340281
ENSMUSG00000030222	Rerg	RAS-like, estrogen-regulated, growth-inhibitor	66.1219	15.4989	4.06827	2.02441	0.00565989	0.346811
ENSMUSG00000055446	A630091E08Rik	RIKEN cDNA A630091E08 gene	27.5597	0	28.5597	4.83591	0.00571084	0.347806
ENSMUSG00000031503	Col4a2	collagen, type IV, alpha 2	7151.99	3947.62	1.81152	0.857197	0.00570692	0.347806
ENSMUSG00000034463	Scara3	scavenger receptor class A, member 3	77.8014	20.9539	3.58941	1.84375	0.00580817	0.350104
ENSMUSG00000050989	Selenon	selenoprotein N	514.214	246.736	2.07969	1.05637	0.00580962	0.350104
ENSMUSG00000061048	Cdh3	cadherin 3	351.047	167.89	2.08448	1.05968	0.00581848	0.350104
ENSMUSG00000027474	Ccm2l	cerebral cavernous malformation 2-like	400.215	186.854	2.13578	1.09476	0.00588203	0.352869
ENSMUSG00000020810	Cygb	cytoglobin	482.513	131.888	3.63851	1.86335	0.00603152	0.357688
ENSMUSG00000031870	Pgr	progesterone receptor	144.143	54.3361	2.62294	1.39119	0.0060089	0.357688
ENSMUSG00000071719	Tmem28	transmembrane protein 28	96.5596	28.726	3.28196	1.71456	0.00603376	0.357688
ENSMUSG00000041859	Mcm3	minichromosome maintenance complex component 3	515.227	253.405	2.02915	1.02088	0.00607197	0.358891
ENSMUSG00000083596	Rpl21-ps15	ribosomal protein L21, pseudogene 15	152.534	55.72	2.70688	1.43663	0.00616621	0.363389
ENSMUSG00000033880	Lgals3bp	lectin, galactoside-binding, soluble, 3 binding protein	2545.25	1201.67	2.11718	1.08214	0.00644935	0.377853
ENSMUSG00000039706	Ldb2	LIM domain binding 2	584.275	285.518	2.04272	1.03049	0.00649293	0.378194
ENSMUSG00000031196	F8	coagulation factor VIII	2858.41	1094.87	2.60926	1.38364	0.006515	0.37838
ENSMUSG00000035279	Ssc5d	scavenger receptor cysteine rich family, 5 domains	31.4983	3.07052	7.98382	2.99708	0.00654706	0.379143
ENSMUSG00000022951	Rcan1	regulator of calcineurin 1	2046.28	1164.85	1.75604	0.812329	0.00673658	0.387876
ENSMUSG00000025776	Crispld1	cysteine-rich secretory protein LCCL domain containing 1	430.661	185.021	2.32049	1.21443	0.00677265	0.388836
ENSMUSG00000044562	Rasip1	Ras interacting protein 1	1021.28	549.347	1.85752	0.893376	0.00713912	0.407431
ENSMUSG00000074305	Peak1	pseudopodium-enriched atypical kinase 1	3213.46	1780.82	1.80403	0.851224	0.00717125	0.407431
ENSMUSG00000041794	Myrip	myosin VIIA and Rab interacting protein	278.213	81.9371	3.36656	1.75128	0.00717787	0.407431
ENSMUSG00000035513	Ntng2	netrin G2	142.685	53.0429	2.65871	1.41073	0.00744747	0.412436
ENSMUSG00000028111	Ctsk	cathepsin K	62.1707	15.7125	3.77986	1.91833	0.00737822	0.412436
ENSMUSG00000015354	Pcolce2	procollagen C-endopeptidase enhancer 2	112.693	34.8788	3.16882	1.66395	0.00747189	0.412436
ENSMUSG00000051669	AU021092	expressed sequence AU021092	793.295	410.893	1.9284	0.947407	0.00762177	0.418404
ENSMUSG00000035431	Sstr1	somatostatin receptor 1	16.8989	0	17.8989	4.1618	0.00782225	0.420199
ENSMUSG00000004562	Arhgef40	Rho guanine nucleotide exchange factor (GEF) 40	659.708	340.415	1.9352	0.952484	0.00780331	0.420199
ENSMUSG00000091199	Gm2619	predicted gene 2619	31.8211	0	32.8211	5.03655	0.00799007	0.423838
ENSMUSG00000000555	Itga5	integrin alpha 5 (fibronectin receptor alpha)	1017	529.866	1.91761	0.939313	0.00795355	0.423838
ENSMUSG00000029752	Asns	asparagine synthetase	91.9733	29.1195	3.08681	1.62612	0.0080169	0.423838
ENSMUSG00000037940	Inpp4b	inositol polyphosphate-4-phosphatase, type II	848.488	372.979	2.27149	1.18364	0.00812389	0.428364
ENSMUSG00000025375	Aatk	apoptosis-associated tyrosine kinase	300.983	140.267	2.13768	1.09604	0.00825381	0.432936
ENSMUSG00000009035	Tmem184b	transmembrane protein 184b	1355.87	748.978	1.80921	0.855362	0.00828266	0.433315
ENSMUSG00000026442	Nfasc	neurofascin	33.7558	1.01229	17.2717	4.11034	0.00839751	0.437041
ENSMUSG00000041992	Rapgef5	Rap guanine nucleotide exchange factor (GEF) 5	1294.49	544.435	2.37515	1.24802	0.0084435	0.438296
ENSMUSG00000006386	Tek	endothelial-specific receptor tyrosine kinase	3694.2	2076.24	1.7789	0.830986	0.00847612	0.438853
ENSMUSG00000047747	Rnf150	ring finger protein 150	373.356	146.801	2.53283	1.34075	0.00855137	0.440715
ENSMUSG00000024011	Pi16	peptidase inhibitor 16	1312.88	619.959	2.11588	1.08126	0.00865553	0.442907
ENSMUSG00000039115	Itga9	integrin alpha 9	1872.79	904.352	2.06968	1.04941	0.00866495	0.442907
ENSMUSG00000033082	Clec1a	C-type lectin domain family 1, member a	822.827	435.164	1.8888	0.91747	0.00878912	0.446974
ENSMUSG00000053825	Ppfia2	protein tyrosine phosphatase, receptor type, f polypeptide (PTPRF), interacting protein (liprin), alpha 2	44.6975	6.25369	6.2999	2.65533	0.00892807	0.450453
ENSMUSG00000019577	Pdk4	pyruvate dehydrogenase kinase, isoenzyme 4	3034.71	1779.78	1.70471	0.769527	0.00899886	0.450775
ENSMUSG00000026043	Col3a1	collagen, type III, alpha 1	2559.93	1323.26	1.93385	0.951479	0.00914852	0.456376
ENSMUSG00000051663	Pcdhb1	protocadherin beta 1	16.2805	0	17.2805	4.11107	0.00924955	0.457294
ENSMUSG00000022537	Tmem44	transmembrane protein 44	718.98	378.286	1.89825	0.924671	0.00929732	0.457716
ENSMUSG00000031497	Tnfsf13b	tumor necrosis factor (ligand) superfamily, member 13b	71.6682	21.3474	3.25176	1.70122	0.00932487	0.457866
ENSMUSG00000038776	Ephx1	epoxide hydrolase 1, microsomal	2167.46	1093.51	1.98122	0.986386	0.00949919	0.457976
ENSMUSG00000001123	Lgals9	lectin, galactose binding, soluble 9	842.722	305.278	2.75476	1.46193	0.00942942	0.457976
ENSMUSG00000050910	Cdr2l	cerebellar degeneration-related protein 2-like	263.811	119.066	2.20555	1.14114	0.00944955	0.457976
ENSMUSG00000055421	Pcdh9	protocadherin 9	130.504	47.9142	2.68846	1.42678	0.00953927	0.457976
ENSMUSG00000024727	Trpm6	transient receptor potential cation channel, subfamily M, member 6	1167.03	648.92	1.79719	0.845743	0.00949004	0.457976
ENSMUSG00000062542	Syt9	synaptotagmin IX	59.1167	14.6665	3.83727	1.94008	0.00957687	0.457976
ENSMUSG00000021187	Tc2n	tandem C2 domains, nuclear	117.393	33.3822	3.44343	1.78385	0.00963467	0.459643
ENSMUSG00000051486	Pcdhb11	protocadherin beta 11	38.3107	6.5009	5.24079	2.38979	0.00982017	0.463543
ENSMUSG00000036334	Igsf10	immunoglobulin superfamily, member 10	138.084	54.4824	2.50681	1.32585	0.00989735	0.463543
ENSMUSG00000071001	Hrct1	histidine rich carboxyl terminus 1	72.3285	9.89764	6.72884	2.75036	0.00985923	0.463543
ENSMUSG00000031543	Ank1	ankyrin 1, erythroid	53.6459	11.7423	4.28854	2.10049	0.00992464	0.463543
ENSMUSG00000066595	Mfsd7b	major facilitator superfamily domain containing 7B	758.219	418.988	1.80772	0.854168	0.0100529	0.467353
ENSMUSG00000029484	Anxa3	annexin A3	521.943	267.105	1.95052	0.963856	0.0101215	0.468372
ENSMUSG00000001946	Esam	endothelial cell-specific adhesion molecule	1543.53	853.57	1.80737	0.853895	0.0101069	0.468372
ENSMUSG00000085743	8430419K02Rik	RIKEN cDNA 8430419K02 gene	15.9996	0	16.9996	4.08743	0.0101922	0.470554
ENSMUSG00000050666	Vstm4	V-set and transmembrane domain containing 4	51.9501	11.2362	4.32735	2.11348	0.0102744	0.472782
ENSMUSG00000066319	Rtp3	receptor transporter protein 3	233.813	83.242	2.78736	1.4789	0.0102876	0.472782
ENSMUSG00000060147	Serpinb6a	serine (or cysteine) peptidase inhibitor, clade B, member 6a	890.496	483.573	1.83976	0.879515	0.0104594	0.475311
ENSMUSG00000050370	Ch25h	cholesterol 25-hydroxylase	205.073	73.0635	2.78239	1.47632	0.0103947	0.475311
ENSMUSG00000032698	Lmo2	LIM domain only 2	1162.74	504.707	2.30122	1.2024	0.0104796	0.475311
ENSMUSG00000035407	Kank4	KN motif and ankyrin repeat domains 4	663.902	350.932	1.88929	0.917846	0.0106298	0.476488
ENSMUSG00000043613	Mmp3	matrix metallopeptidase 3	152.454	8.55913	16.0532	4.00479	0.0107375	0.479169
ENSMUSG00000025743	Sdc3	syndecan 3	1956.73	1120.32	1.74591	0.803982	0.0109528	0.483396
ENSMUSG00000019978	Epb41l2	erythrocyte membrane protein band 4.1 like 2	2360.53	1367.43	1.72572	0.787202	0.0110053	0.483581
ENSMUSG00000020151	Ptprr	protein tyrosine phosphatase, receptor type, R	119.325	44.9446	2.61893	1.38897	0.0109852	0.483581
ENSMUSG00000025876	Unc5a	unc-5 netrin receptor A	74.7181	21.6063	3.34942	1.74391	0.011057	0.483732
ENSMUSG00000074934	Grem1	gremlin 1, DAN family BMP antagonist	55.6225	12.3947	4.22722	2.07971	0.0112099	0.487231
ENSMUSG00000052861	Dnah6	dynein, axonemal, heavy chain 6	19.2151	0.686076	11.9894	3.58369	0.0113352	0.490548
ENSMUSG00000056515	Rab31	RAB31, member RAS oncogene family	421.302	212.397	1.97895	0.984735	0.0113781	0.491342
ENSMUSG00000049288	Lix1l	Lix1-like	305.641	76.4047	3.96153	1.98606	0.0114331	0.492656
ENSMUSG00000061535	C1qtnf7	C1q and tumor necrosis factor related protein 7	95.348	32.1564	2.90587	1.53897	0.0116142	0.497732
ENSMUSG00000037095	Lrg1	leucine-rich alpha-2-glycoprotein 1	63.7931	17.5571	3.49155	1.80387	0.0116821	0.499091
ENSMUSG00000022587	Ly6e	lymphocyte antigen 6 complex, locus E	6282.41	2537.82	2.47494	1.30739	0.0117613	0.501406
ENSMUSG00000003500	Impdh1	inosine 5'-phosphate dehydrogenase 1	518.769	281.297	1.84121	0.880656	0.0119182	0.504872
ENSMUSG00000015468	Notch4	notch 4	2307.63	1351.43	1.70702	0.771477	0.0122287	0.512606
ENSMUSG00000046280	She	src homology 2 domain-containing transforming protein E	1177.74	515.233	2.28335	1.19115	0.0130537	0.532704
ENSMUSG00000031673	Cdh11	cadherin 11	166.44	69.3069	2.38156	1.2519	0.0130347	0.532704
ENSMUSG00000060594	Layn	layilin	202.126	86.336	2.3258	1.21773	0.0130112	0.532704
ENSMUSG00000033831	Fgb	fibrinogen beta chain	38.2373	6.64719	5.13094	2.35922	0.013382	0.542786
ENSMUSG00000041453	Rpl21	ribosomal protein L21	345.461	176.967	1.94677	0.961083	0.0134174	0.54312
ENSMUSG00000052726	Kcnt2	potassium channel, subfamily T, member 2	87.7685	26.9603	3.1748	1.66667	0.0136864	0.550671
ENSMUSG00000026167	Wnt10a	wingless-type MMTV integration site family, member 10A	21.4558	1.01229	11.1593	3.48018	0.0138012	0.55093
ENSMUSG00000048696	Mex3d	mex3 RNA binding family member D	202.17	89.8673	2.2359	1.16086	0.0138902	0.551125
ENSMUSG00000021281	Tnfaip2	tumor necrosis factor, alpha-induced protein 2	1944.03	1130.73	1.71864	0.781267	0.0138442	0.551125
ENSMUSG00000031189	Aff2	AF4/FMR2 family, member 2	77.9775	25.5765	2.97171	1.57129	0.0138761	0.551125
ENSMUSG00000025959	Klf7	Kruppel-like factor 7 (ubiquitous)	1143.82	650.496	1.75721	0.81329	0.0142401	0.551482
ENSMUSG00000020092	Pald1	phosphatase domain containing, paladin 1	371.62	184.549	2.0082	1.00591	0.0139898	0.551482
ENSMUSG00000027082	Tfpi	tissue factor pathway inhibitor	236.928	113.486	2.07822	1.05535	0.014257	0.551482
ENSMUSG00000054720	Lrrc8c	leucine rich repeat containing 8 family, member C	1268.15	725.291	1.74744	0.805241	0.0142523	0.551482
ENSMUSG00000041596	Nlrp5-ps	NLR family, pyrin domain containing 5, pseudogene	52.2163	12.2484	4.0168	2.00605	0.01424	0.551482
ENSMUSG00000044469	Tnfaip8l1	tumor necrosis factor, alpha-induced protein 8-like 1	83.6852	27.2075	3.00222	1.58603	0.0144993	0.556715
ENSMUSG00000017309	Cd300lg	CD300 molecule like family member G	1261.79	715.463	1.76253	0.817648	0.0146217	0.556722
ENSMUSG00000056492	Adgrf5	adhesion G protein-coupled receptor F5	13895.3	7553.19	1.83955	0.879353	0.0146356	0.556722
ENSMUSG00000060675	Pla2g16	phospholipase A2, group XVI	540.122	292.883	1.84128	0.880713	0.0146358	0.556722
ENSMUSG00000029185	Fam114a1	family with sequence similarity 114, member A1	471.431	179.464	2.61787	1.38839	0.0147363	0.559225
ENSMUSG00000037225	Fgf2	fibroblast growth factor 2	18.1524	0.686076	11.3591	3.50578	0.0152689	0.572926
ENSMUSG00000056870	Gulp1	GULP, engulfment adaptor PTB domain containing 1	126.419	51.5918	2.42279	1.27667	0.0153525	0.574985
ENSMUSG00000003418	St8sia6	ST8 alpha-N-acetyl-neuraminide alpha-2,8-sialyltransferase 6	1233.95	694.633	1.77529	0.828053	0.0155715	0.580395
ENSMUSG00000074039	4930520O04Rik	RIKEN cDNA 4930520O04 gene	38.8997	7.00705	4.98307	2.31704	0.0156201	0.580669
ENSMUSG00000040723	Rcsd1	RCSD domain containing 1	1002.32	532.24	1.88156	0.911929	0.0158652	0.582217
ENSMUSG00000075702	Selenom	selenoprotein M	484.663	257.994	1.87519	0.907038	0.0159733	0.583191
ENSMUSG00000040322	Slc25a24	solute carrier family 25 (mitochondrial carrier, phosphate carrier), member 24	366.342	182.783	1.99878	0.999119	0.015979	0.583191
ENSMUSG00000044258	Ctla2a	cytotoxic T lymphocyte-associated protein 2 alpha	795.804	379.389	2.09471	1.06675	0.0161006	0.58656
ENSMUSG00000042846	Lrrtm3	leucine rich repeat transmembrane neuronal 3	110.962	9.864	10.3058	3.36538	0.0162322	0.589319
ENSMUSG00000009185	Ccl8	chemokine (C-C motif) ligand 8	140.125	15.4316	8.58863	3.10243	0.0162713	0.589319
ENSMUSG00000040631	Dok4	docking protein 4	241.868	116.456	2.06774	1.04805	0.0164628	0.592595
ENSMUSG00000034881	Tbxa2r	thromboxane A2 receptor	116.437	43.7977	2.62149	1.39039	0.0166216	0.594595
ENSMUSG00000021091	Serpina3n	serine (or cysteine) peptidase inhibitor, clade A, member 3N	140.274	5.24139	22.635	4.50048	0.0166053	0.594595
ENSMUSG00000026837	Col5a1	collagen, type V, alpha 1	341.916	151.076	2.2549	1.17306	0.0166636	0.594595
ENSMUSG00000027188	Pamr1	peptidase domain containing associated with muscle regeneration 1	339.568	177.079	1.91245	0.935423	0.0168523	0.596591
ENSMUSG00000027322	Siglec1	sialic acid binding Ig-like lectin 1, sialoadhesin	371.161	109.708	3.36164	1.74917	0.0170946	0.60118
ENSMUSG00000025855	Prkar1b	protein kinase, cAMP dependent regulatory, type I beta	137.153	51.997	2.60681	1.38228	0.017162	0.60118
ENSMUSG00000030411	Nova2	neuro-oncological ventral antigen 2	392.457	202.106	1.9372	0.953975	0.0171374	0.60118
ENSMUSG00000041390	Mdfic	MyoD family inhibitor domain containing	914.951	515.46	1.77352	0.826614	0.0173207	0.602045
ENSMUSG00000041571	Selenow	selenoprotein W	619.473	353.989	1.74786	0.805593	0.0172964	0.602045
ENSMUSG00000026921	Egfl7	EGF-like domain 7	1598.02	937.868	1.70314	0.768195	0.0175171	0.60725
ENSMUSG00000037362	Nov	nephroblastoma overexpressed gene	217.939	3.57667	47.8382	5.58009	0.0176069	0.608388
ENSMUSG00000001833	Sept7	septin 7	2723.21	1524.36	1.78594	0.836685	0.0176107	0.608388
ENSMUSG00000007682	Dio2	deiodinase, iodothyronine, type II	95.8804	34.6871	2.71472	1.4408	0.0177521	0.610119
ENSMUSG00000041633	Kctd12b	potassium channel tetramerisation domain containing 12b	466.557	245.364	1.89783	0.924352	0.0176987	0.610119
ENSMUSG00000009585	Apobec3	apolipoprotein B mRNA editing enzyme, catalytic polypeptide 3	674.198	359.425	1.87334	0.905611	0.0179299	0.61203
ENSMUSG00000043251	Exoc3l	exocyst complex component 3-like	199.148	94.2646	2.10097	1.07105	0.0179095	0.61203
ENSMUSG00000059588	Calcrl	calcitonin receptor-like	2887.42	1355.06	2.13001	1.09086	0.0181719	0.617429
ENSMUSG00000034614	Pik3ip1	phosphoinositide-3-kinase interacting protein 1	357.905	185.043	1.92915	0.947965	0.0184745	0.624527
ENSMUSG00000045392	Olfr1033	olfactory receptor 1033	31.5276	4.94882	5.46791	2.45099	0.0184406	0.624527
ENSMUSG00000037358	4930578C19Rik	RIKEN cDNA 4930578C19 gene	126.167	51.8844	2.40463	1.26581	0.0185185	0.624673
ENSMUSG00000061232	H2-K1	histocompatibility 2, K1, K region	11812.4	3909.86	3.02066	1.59486	0.0187823	0.626332
ENSMUSG00000031502	Col4a1	collagen, type IV, alpha 1	10833	5828.58	1.85844	0.894095	0.0186213	0.626332
ENSMUSG00000046413	Irx3os	iroquois homeobox 3, opposite strand	34.9192	5.60125	5.44126	2.44394	0.0186379	0.626332
ENSMUSG00000020674	Pxdn	peroxidasin	1222.26	606.464	2.01372	1.00986	0.0189759	0.629502
ENSMUSG00000026785	Pkn3	protein kinase N3	261.507	123.823	2.10303	1.07247	0.0189679	0.629502
ENSMUSG00000041420	Meis3	Meis homeobox 3	159.345	33.5739	4.63774	2.21342	0.0191509	0.631335
ENSMUSG00000071178	Serpina1b	serine (or cysteine) preptidase inhibitor, clade A, member 1B	110.503	1.37215	47.005	5.55474	0.0192586	0.631785
ENSMUSG00000026981	Il1rn	interleukin 1 receptor antagonist	119.252	48.1278	2.44774	1.29145	0.0193704	0.633047
ENSMUSG00000022122	Ednrb	endothelin receptor type B	1484.87	886.061	1.67505	0.744202	0.0195814	0.635257
ENSMUSG00000084803	5830444B04Rik	RIKEN cDNA 5830444B04 gene	52.0402	13.8005	3.58367	1.84144	0.0195443	0.635257
ENSMUSG00000034037	Fgd5	FYVE, RhoGEF and PH domain containing 5	3410.09	1762.2	1.9346	0.952038	0.0195771	0.635257
ENSMUSG00000048572	Tmem252	transmembrane protein 252	811.5	474.461	1.70887	0.773041	0.0197563	0.636357
ENSMUSG00000072623	Zfp9	zinc finger protein 9	92.3108	34.0347	2.66338	1.41326	0.0198812	0.636357
ENSMUSG00000001227	Sema6b	sema domain, transmembrane domain (TM), and cytoplasmic domain, (semaphorin) 6B	401.972	222.698	1.80141	0.849123	0.0201547	0.638514
ENSMUSG00000050896	Rtn4rl2	reticulon 4 receptor-like 2	34.3008	5.78118	5.2057	2.38009	0.020001	0.638514
ENSMUSG00000091897	Gm17019	predicted gene 17019	21.8394	2.05823	7.46818	2.90076	0.0202035	0.638514
ENSMUSG00000028763	Hspg2	perlecan (heparan sulfate proteoglycan 2)	11054.1	6798.47	1.62587	0.701215	0.0203544	0.640683
ENSMUSG00000004098	Col5a3	collagen, type V, alpha 3	97.8885	35.126	2.73732	1.45277	0.0208945	0.65314
ENSMUSG00000024778	Fas	Fas (TNF receptor superfamily member 6)	429.672	219.505	1.95312	0.965778	0.0211389	0.658726
ENSMUSG00000002732	Fkbp7	FK506 binding protein 7	114.517	29.5584	3.78021	1.91847	0.0212924	0.661453
ENSMUSG00000025888	Casp1	caspase 1	115.758	46.9355	2.43573	1.28435	0.0212925	0.661453
ENSMUSG00000036856	Wnt4	wingless-type MMTV integration site family, member 4	62.7891	17.8161	3.39014	1.76135	0.0214748	0.663968
ENSMUSG00000074482	Gm16589	predicted gene 16589	278.951	118.109	2.35037	1.23289	0.021506	0.663968
ENSMUSG00000009628	Tex15	testis expressed gene 15	39.7402	8.34556	4.35932	2.1241	0.0214716	0.663968
ENSMUSG00000049420	Tmem200a	transmembrane protein 200A	23.9481	2.02459	8.24843	3.04412	0.0215857	0.664116
ENSMUSG00000050761	Gp1bb	glycoprotein Ib, beta polypeptide	13.522	0	14.522	3.86017	0.0216102	0.664116
ENSMUSG00000026787	Gad2	glutamic acid decarboxylase 2	13.4927	0	14.4927	3.85725	0.0217442	0.664782
ENSMUSG00000031015	Swap70	SWA-70 protein	1859.04	1130.04	1.64454	0.717686	0.0217707	0.664782
ENSMUSG00000054006	D630008O14Rik	RIKEN cDNA D630008O14 gene	28.8299	4.26274	5.66813	2.50287	0.0221347	0.667574
ENSMUSG00000027848	Olfml3	olfactomedin-like 3	183.55	87.2575	2.09104	1.06422	0.0221145	0.667574
ENSMUSG00000039911	Spsb1	splA/ryanodine receptor domain and SOCS box containing 1	205.004	96.987	2.10236	1.07201	0.0221189	0.667574
ENSMUSG00000029406	Pitpnm2	phosphatidylinositol transfer protein, membrane-associated 2	1204.42	717.361	1.67802	0.746758	0.0221423	0.667574
ENSMUSG00000066571	4931406P16Rik	RIKEN cDNA 4931406P16 gene	2090.76	1187.19	1.76047	0.815958	0.0221049	0.667574
ENSMUSG00000041559	Fmod	fibromodulin	459.111	134.08	3.4062	1.76816	0.0224777	0.670036
ENSMUSG00000075254	Heg1	heart development protein with EGF-like domains 1	10398.6	4977.33	2.08896	1.06279	0.0225141	0.670036
ENSMUSG00000002504	Slc9a3r2	solute carrier family 9 (sodium/hydrogen exchanger), member 3 regulator 2	3710.93	2214.14	1.67571	0.744772	0.0226146	0.670036
ENSMUSG00000049044	Rapgef4	Rap guanine nucleotide exchange factor (GEF) 4	1036.76	355.329	2.91237	1.54219	0.0226388	0.670036
ENSMUSG00000029417	Cxcl9	chemokine (C-X-C motif) ligand 9	274.822	83.2318	3.27455	1.7113	0.0225856	0.670036
ENSMUSG00000031803	B3gnt3	UDP-GlcNAc:betaGal beta-1,3-N-acetylglucosaminyltransferase 3	299.482	159.477	1.87243	0.904913	0.0225225	0.670036
ENSMUSG00000053137	Mapk11	mitogen-activated protein kinase 11	172.456	78.4848	2.18225	1.12582	0.0228507	0.67308
ENSMUSG00000030772	Dkk3	dickkopf WNT signaling pathway inhibitor 3	359.905	152.91	2.3449	1.22953	0.023213	0.679779
ENSMUSG00000020154	Ptprb	protein tyrosine phosphatase, receptor type, B	14863.5	8558.11	1.73668	0.796335	0.0234563	0.682285
ENSMUSG00000018381	Abi3	ABI gene family, member 3	190.73	90.9469	2.08522	1.0602	0.0234613	0.682285
ENSMUSG00000020614	Fam20a	family with sequence similarity 20, member A	269.397	137.353	1.9544	0.966726	0.0235765	0.684642
ENSMUSG00000026676	Ccdc3	coiled-coil domain containing 3	244.973	41.9531	5.72655	2.51767	0.0236349	0.685345
ENSMUSG00000030107	Usp18	ubiquitin specific peptidase 18	425.893	127.366	3.32559	1.73361	0.0238216	0.68777
ENSMUSG00000056121	Fez2	fasciculation and elongation protein zeta 2 (zygin II)	1039.5	625.311	1.66132	0.732329	0.0239903	0.68966
ENSMUSG00000036960	Clca2	chloride channel accessory 2	18.2551	0	19.2551	4.26717	0.0241358	0.692279
ENSMUSG00000014592	Camta1	calmodulin binding transcription activator 1	436.206	244.137	1.78352	0.834726	0.024185	0.692279
ENSMUSG00000039899	Fgl2	fibrinogen-like protein 2	795.217	462.754	1.7169	0.779804	0.0241637	0.692279
ENSMUSG00000010358	Ifi35	interferon-induced protein 35	247.291	102.476	2.39951	1.26274	0.024262	0.693493
ENSMUSG00000038086	Hspb2	heat shock protein 2	37.5875	7.47955	4.55066	2.18607	0.0244313	0.695355
ENSMUSG00000073490	Ifi207	interferon activated gene 207	1433.18	668.928	2.14081	1.09815	0.0245591	0.698001
ENSMUSG00000033569	Adgrb3	adhesion G protein-coupled receptor B3	48.133	11.3488	3.97877	1.99232	0.0248015	0.701216
ENSMUSG00000020627	Klhl29	kelch-like 29	96.9558	38.2974	2.49268	1.3177	0.0248105	0.701216
ENSMUSG00000000901	Mmp11	matrix metallopeptidase 11	108.252	44.7647	2.38725	1.25535	0.0248528	0.701375
ENSMUSG00000043505	Gimap5	GTPase, IMAP family member 5	419.193	237.804	1.75958	0.815227	0.0252129	0.709096
ENSMUSG00000020032	Nuak1	NUAK family, SNF1-like kinase, 1	1506.42	566.388	2.65678	1.40968	0.0255664	0.715419
ENSMUSG00000035458	Tnni3	troponin I, cardiac 3	28.0628	4.26274	5.52236	2.46528	0.0255812	0.715419
ENSMUSG00000030669	Calca	calcitonin/calcitonin-related polypeptide, alpha	242.204	95.5812	2.51813	1.33235	0.0257976	0.719925
ENSMUSG00000035713	Usp35	ubiquitin specific peptidase 35	167.591	82.4769	2.01961	1.01407	0.0259217	0.721433
ENSMUSG00000048142	Nat8l	N-acetyltransferase 8-like	33.4288	5.45497	5.3337	2.41514	0.0260658	0.723388
ENSMUSG00000026883	Dab2ip	disabled 2 interacting protein	2272.37	1396.12	1.62718	0.702374	0.0261813	0.723855
ENSMUSG00000029581	Fscn1	fascin actin-bundling protein 1	272.677	141.932	1.91474	0.93715	0.0263013	0.725894
ENSMUSG00000026586	Prrx1	paired related homeobox 1	74.6615	26.3752	2.76387	1.46669	0.026682	0.734378
ENSMUSG00000028337	Coro2a	coronin, actin binding protein 2A	223.894	109.854	2.02874	1.02058	0.0267963	0.735505
ENSMUSG00000031872	Bean1	brain expressed, associated with Nedd4, 1	29.4776	4.76889	5.2831	2.40139	0.0269349	0.738296
ENSMUSG00000000530	Acvrl1	activin A receptor, type II-like 1	1447.05	782.486	1.84822	0.886135	0.0271773	0.740614
ENSMUSG00000034911	Ushbp1	Usher syndrome 1C binding protein 1	1217.88	734.762	1.65662	0.728245	0.0275085	0.746468
ENSMUSG00000052560	Cpne8	copine VIII	310.11	131.281	2.35189	1.23382	0.0279331	0.75228
ENSMUSG00000038264	Sema7a	sema domain, immunoglobulin domain (Ig), and GPI membrane anchor, (semaphorin) 7A	765.801	453.71	1.68635	0.753904	0.0280011	0.753099
ENSMUSG00000033420	Antxr1	anthrax toxin receptor 1	501.248	215.727	2.31743	1.21252	0.0283534	0.759516
ENSMUSG00000046731	Kctd11	potassium channel tetramerisation domain containing 11	166.073	80.8576	2.04102	1.02929	0.0284541	0.761194
ENSMUSG00000022074	Tnfrsf10b	tumor necrosis factor receptor superfamily, member 10b	182.777	70.3192	2.57682	1.36559	0.0290926	0.768658
ENSMUSG00000039316	Rftn1	raftlin lipid raft linker 1	485.416	279.476	1.73425	0.794313	0.0291036	0.768658
ENSMUSG00000024349	Tmem173	transmembrane protein 173	285.602	137.916	2.06313	1.04483	0.0292221	0.768658
ENSMUSG00000039787	Cercam	cerebral endothelial cell adhesion molecule	61.0179	5.96111	8.90919	3.15529	0.0290973	0.768658
ENSMUSG00000033213	AA467197	expressed sequence AA467197	18.0937	1.37215	8.04908	3.00882	0.029182	0.768658
ENSMUSG00000085151	1110018N20Rik	RIKEN cDNA 1110018N20 gene	27.8112	3.54303	6.34186	2.66491	0.0291046	0.768658
ENSMUSG00000038963	Slco4a1	solute carrier organic anion transporter family, member 4a1	310.732	169.96	1.82342	0.86665	0.0293085	0.768658
ENSMUSG00000040896	Kcnd3	potassium voltage-gated channel, Shal-related family, member 3	60.3702	20.3014	2.88104	1.52659	0.0292057	0.768658
ENSMUSG00000031871	Cdh5	cadherin 5	6261.41	3111.27	2.01217	1.00875	0.029278	0.768658
ENSMUSG00000039057	Myo16	myosin XVI	14.5554	0	15.5554	3.95934	0.0296996	0.775552
ENSMUSG00000021508	Cxcl14	chemokine (C-X-C motif) ligand 14	107.799	26.9267	3.89587	1.96195	0.0298645	0.776103
ENSMUSG00000091694	Apol11b	apolipoprotein L 11b	35.3007	0	36.3007	5.18192	0.0302157	0.781941
ENSMUSG00000037820	Tgm2	transglutaminase 2, C polypeptide	3724.61	2398.69	1.55254	0.634628	0.0302443	0.781941
ENSMUSG00000027377	Mall	mal, T cell differentiation protein-like	63.2901	22.1797	2.77355	1.47173	0.0303936	0.784788
ENSMUSG00000034595	Ppp1r18	protein phosphatase 1, regulatory subunit 18	1033.17	551.632	1.87136	0.904086	0.030756	0.788441
ENSMUSG00000039005	Tlr4	toll-like receptor 4	482.947	178.948	2.68938	1.42727	0.0307843	0.788441
ENSMUSG00000033855	Ston1	stonin 1	579.905	300.115	1.92918	0.947985	0.0310142	0.791528
ENSMUSG00000039616	Mocos	molybdenum cofactor sulfurase	160.852	78.1133	2.04582	1.03268	0.0310496	0.791528
ENSMUSG00000026764	Kif5c	kinesin family member 5C	128.808	59.0713	2.1609	1.11163	0.0310458	0.791528
ENSMUSG00000050147	F2rl3	coagulation factor II (thrombin) receptor-like 3	29.7145	5.99476	4.39107	2.13457	0.031209	0.792566
ENSMUSG00000035105	Egln3	egl-9 family hypoxia-inducible factor 3	260.541	140.728	1.84537	0.883914	0.031372	0.794905
ENSMUSG00000062127	Cttnbp2nl	CTTNBP2 N-terminal like	1868.8	1181.72	1.58093	0.660778	0.0313805	0.794905
ENSMUSG00000027951	Adar	adenosine deaminase, RNA-specific	1660.28	998.65	1.66187	0.732804	0.0315611	0.798045
ENSMUSG00000001995	Sipa1l2	signal-induced proliferation-associated 1 like 2	1521.35	940.308	1.61727	0.693558	0.0317662	0.800191
ENSMUSG00000055413	H2-Q5	histocompatibility 2, Q region locus 5	384.899	125.634	3.04736	1.60756	0.0320334	0.804327
ENSMUSG00000030681	Mvp	major vault protein	1326.75	818.465	1.62026	0.696225	0.0320289	0.804327
ENSMUSG00000055172	C1ra	complement component 1, r subcomponent A	347.945	94.051	3.67113	1.87622	0.032126	0.805643
ENSMUSG00000022960	Donson	downstream neighbor of SON	219.233	119.323	1.83034	0.872113	0.0324987	0.810221
ENSMUSG00000030584	Dpf1	D4, zinc and double PHD fingers family 1	17.7834	1.19222	8.56822	3.09899	0.0325675	0.810221
ENSMUSG00000024912	Fosl1	fos-like antigen 1	25.3336	3.39674	5.98936	2.5824	0.0327223	0.812461
ENSMUSG00000037410	Tbc1d2b	TBC1 domain family, member 2B	840.479	501.648	1.67409	0.743379	0.0329181	0.816311
ENSMUSG00000073491	Ifi213	interferon activated gene 213	747.246	157.093	4.73296	2.24274	0.0333392	0.816864
ENSMUSG00000021943	Gdf10	growth differentiation factor 10	709.466	126.061	5.59153	2.48324	0.0335575	0.816864
ENSMUSG00000053477	Tcf4	transcription factor 4	1954.86	1200.69	1.62759	0.702738	0.0336026	0.816864
ENSMUSG00000026872	Zeb2	zinc finger E-box binding homeobox 2	4203.17	2673.13	1.57216	0.652749	0.0334781	0.816864
ENSMUSG00000070476	Fam217b	family with sequence similarity 217, member B	164.006	77.9787	2.08925	1.06299	0.0335732	0.816864
ENSMUSG00000052776	Oas1a	2'-5' oligoadenylate synthetase 1A	282.43	118.042	2.38093	1.25153	0.0334889	0.816864
ENSMUSG00000029428	Stx2	syntaxin 2	544.092	313.647	1.73239	0.792768	0.0332022	0.816864
ENSMUSG00000023964	Calcr	calcitonin receptor	26.7506	3.90288	5.66005	2.50082	0.0333608	0.816864
ENSMUSG00000028862	Map3k6	mitogen-activated protein kinase kinase kinase 6	471.368	279.138	1.6862	0.753772	0.0339661	0.823945
ENSMUSG00000042821	Snai1	snail family zinc finger 1	70.2198	14.7792	4.51353	2.17426	0.0341224	0.825737
ENSMUSG00000032667	Pon2	paraoxonase 2	397.383	219.888	1.80355	0.85084	0.0343684	0.828144
ENSMUSG00000047953	Gp5	glycoprotein 5 (platelet)	17.8421	0	18.8421	4.23589	0.0344856	0.828524
ENSMUSG00000045573	Penk	preproenkephalin	58.2049	17.6361	3.17689	1.66761	0.0344701	0.828524
ENSMUSG00000030748	Il4ra	interleukin 4 receptor, alpha	1349.34	753.262	1.79028	0.840186	0.0346353	0.830923
ENSMUSG00000037921	Ddx60	DEAD (Asp-Glu-Ala-Asp) box polypeptide 60	414.404	109.943	3.74429	1.90469	0.0346685	0.830923
ENSMUSG00000086938	4930481A15Rik	RIKEN cDNA 4930481A15 gene	21.3824	2.38445	6.61333	2.72538	0.0349864	0.836542
ENSMUSG00000015745	Plekho1	pleckstrin homology domain containing, family O member 1	872.977	517.216	1.68651	0.754043	0.0353358	0.83889
ENSMUSG00000030342	Cd9	CD9 antigen	952.246	569.603	1.67059	0.740361	0.0353342	0.83889
ENSMUSG00000025790	Slco3a1	solute carrier organic anion transporter family, member 3a1	900.746	554.903	1.62213	0.697888	0.0352111	0.83889
ENSMUSG00000025407	Gli1	GLI-Kruppel family member GLI1	62.9212	22.326	2.74034	1.45435	0.0359387	0.845192
ENSMUSG00000060550	H2-Q7	histocompatibility 2, Q region locus 7	1033.3	291.252	3.53909	1.82338	0.0358046	0.845192
ENSMUSG00000074793	Hspa12b	heat shock protein 12B	464.168	265.733	1.74395	0.802357	0.0359013	0.845192
ENSMUSG00000030889	Vwa3a	von Willebrand factor A domain containing 3A	52.776	17.4108	2.92089	1.54641	0.0358531	0.845192
ENSMUSG00000086986	Gm12103	predicted gene 12103	11.8263	0	12.8263	3.68103	0.0360997	0.845861
ENSMUSG00000000567	Sox9	SRY (sex determining region Y)-box 9	313.497	69.3742	4.46892	2.15993	0.036136	0.845861
ENSMUSG00000056367	Actr3b	ARP3 actin-related protein 3B	19.4352	1.69837	7.57316	2.92089	0.036343	0.849714
ENSMUSG00000052180	Serpinb6c	serine (or cysteine) peptidase inhibitor, clade B, member 6c	11.7529	0	12.7529	3.67275	0.0366644	0.85623
ENSMUSG00000026879	Gsn	gelsolin	3486.34	2225.33	1.56641	0.647459	0.0369444	0.858189
ENSMUSG00000044229	Nxpe4	neurexophilin and PC-esterase domain family, member 4	269.378	70.0603	3.80491	1.92786	0.0369625	0.858189
ENSMUSG00000032440	Tgfbr2	transforming growth factor, beta receptor II	3932.19	2510.52	1.56606	0.64714	0.0370271	0.858693
ENSMUSG00000018507	Trpv2	transient receptor potential cation channel, subfamily V, member 2	249.121	122.721	2.02165	1.01553	0.0371823	0.85931
ENSMUSG00000044703	Phf11a	PHD finger protein 11A	53.7066	17.1973	3.00631	1.58799	0.0371419	0.85931
ENSMUSG00000032562	Gnai2	guanine nucleotide binding protein (G protein), alpha inhibiting 2	6088.76	3906.61	1.55844	0.640098	0.0373	0.861038
ENSMUSG00000030796	Tead2	TEA domain family member 2	196.328	82.1624	2.37281	1.24659	0.0375954	0.861898
ENSMUSG00000019066	Rab3d	RAB3D, member RAS oncogene family	399.892	228.076	1.75004	0.807389	0.0375784	0.861898
ENSMUSG00000032431	Crtap	cartilage associated protein	385.924	223.363	1.72455	0.786218	0.0376839	0.862939
ENSMUSG00000064262	Gimap8	GTPase, IMAP family member 8	826.21	494.405	1.66976	0.739645	0.037892	0.866716
ENSMUSG00000031539	Ap3m2	adaptor-related protein complex 3, mu 2 subunit	279.351	157.666	1.76693	0.821243	0.0379723	0.867562
ENSMUSG00000073489	Ifi204	interferon activated gene 204	634.49	234.239	2.70147	1.43374	0.038112	0.868474
ENSMUSG00000034265	Zdhhc14	zinc finger, DHHC domain containing 14	228.967	123.35	1.84934	0.887014	0.0381423	0.868474
ENSMUSG00000035934	Pknox2	Pbx/knotted 1 homeobox 2	110.241	36.3182	2.98088	1.57574	0.038105	0.868474
ENSMUSG00000047307	Pcdhb13	protocadherin beta 13	24.3757	3.39674	5.77148	2.52894	0.0386936	0.869426
ENSMUSG00000024451	Arap3	ArfGAP with RhoGAP domain, ankyrin repeat and PH domain 3	2141.46	1352.51	1.58289	0.662565	0.0382316	0.869426
ENSMUSG00000014361	Mertk	c-mer proto-oncogene tyrosine kinase	1507.6	971.776	1.55082	0.633028	0.0386885	0.869426
ENSMUSG00000044365	Cxxc4	CXXC finger 4	45.7435	12.2148	3.53721	1.82261	0.0384991	0.869426
ENSMUSG00000067149	Jchain	immunoglobulin joining chain	291.808	112.778	2.57349	1.36373	0.0385487	0.869426
ENSMUSG00000029322	Plac8	placenta-specific 8	291.307	123.103	2.35536	1.23595	0.0386756	0.869426
ENSMUSG00000025608	Podxl	podocalyxin-like	11787.4	6803.16	1.73253	0.792882	0.0387048	0.869426
ENSMUSG00000059401	Mamld1	mastermind-like domain containing 1	135.457	63.593	2.11257	1.079	0.0385685	0.869426
ENSMUSG00000022324	Matn2	matrilin 2	284.449	123.115	2.29987	1.20155	0.0389031	0.870952
ENSMUSG00000013846	St3gal1	ST3 beta-galactoside alpha-2,3-sialyltransferase 1	1141.53	629.644	1.81168	0.85733	0.0388857	0.870952
ENSMUSG00000050953	Gja1	gap junction protein, alpha 1	401.643	225.31	1.77917	0.831202	0.0391384	0.873912
ENSMUSG00000021217	Tshz3	teashirt zinc finger family member 3	237.058	112.778	2.09229	1.06509	0.0391662	0.873912
ENSMUSG00000039497	Dse	dermatan sulfate epimerase	365.581	213.026	1.71279	0.776345	0.0396692	0.87732
ENSMUSG00000005267	Zfp287	zinc finger protein 287	179.065	89.5411	1.98876	0.991871	0.0395536	0.87732
ENSMUSG00000023000	Dhh	desert hedgehog	102.292	29.5584	3.38017	1.7571	0.0395292	0.87732
ENSMUSG00000023036	Pcdhgc4	protocadherin gamma subfamily C, 4	2501.14	1354.26	1.84625	0.884597	0.0396582	0.87732
ENSMUSG00000029093	Sorcs2	sortilin-related VPS10 domain containing receptor 2	71.7856	25.9817	2.69759	1.43167	0.0396018	0.87732
ENSMUSG00000032537	Ephb1	Eph receptor B1	151.132	63.7393	2.34992	1.23261	0.0395701	0.87732
ENSMUSG00000007440	Pcdha11	protocadherin alpha 11	36.158	9.93128	3.39923	1.76521	0.0400445	0.882697
ENSMUSG00000055254	Ntrk2	neurotrophic tyrosine kinase, receptor, type 2	70.8696	25.1157	2.75197	1.46047	0.0403178	0.885798
ENSMUSG00000028249	Sdcbp	syndecan binding protein	2206.31	1421.58	1.55162	0.633774	0.0403968	0.886562
ENSMUSG00000035916	Ptprq	protein tyrosine phosphatase, receptor type, Q	455.982	0	456.982	8.83599	0.0404492	0.886739
ENSMUSG00000028369	Svep1	sushi, von Willebrand factor type A, EGF and pentraxin domain containing 1	345.368	145.475	2.3647	1.24166	0.0406555	0.888064
ENSMUSG00000070933	Speer4d	spermatogenesis associated glutamate (E)-rich protein 4D	11.4427	0	12.4427	3.63723	0.0407057	0.888064
ENSMUSG00000032198	Dock6	dedicator of cytokinesis 6	2314.8	1476.74	1.56712	0.648114	0.0408877	0.888576
ENSMUSG00000056220	Pla2g4a	phospholipase A2, group IVA (cytosolic, calcium-dependent)	613.434	239.909	2.55048	1.35077	0.0410685	0.889135
ENSMUSG00000022622	Acr	acrosin prepropeptide	29.8466	5.96111	4.43127	2.14772	0.0410361	0.889135
ENSMUSG00000028081	Rps3a1	ribosomal protein S3A1	328.637	191.701	1.71062	0.774517	0.0410477	0.889135
ENSMUSG00000042436	Mfap4	microfibrillar-associated protein 4	265.559	118.301	2.23434	1.15985	0.0412418	0.889727
ENSMUSG00000025069	Gsto2	glutathione S-transferase omega 2	32.5296	7.33327	4.02358	2.00848	0.0411799	0.889727
ENSMUSG00000031778	Cx3cl1	chemokine (C-X3-C motif) ligand 1	1748.41	839.587	2.08118	1.0574	0.041318	0.890204
ENSMUSG00000022505	Emp2	epithelial membrane protein 2	618.413	159.803	3.85199	1.9456	0.0413655	0.89027
ENSMUSG00000023008	Fmnl3	formin-like 3	1889.83	1015.92	1.85938	0.89482	0.0417899	0.896515
ENSMUSG00000079505	Gm11131	predicted gene 11131	54.9748	17.8497	2.96953	1.57024	0.0420798	0.897926
ENSMUSG00000027217	Tspan18	tetraspanin 18	769.632	499.225	1.54057	0.623464	0.0420134	0.897926
ENSMUSG00000028037	Ifi44	interferon-induced protein 44	1459.83	655.443	2.22537	1.15404	0.0420714	0.897926
ENSMUSG00000026163	Sphkap	SPHK1 interactor, AKAP domain containing	20.7473	2.02459	7.19019	2.84603	0.0423041	0.901516
ENSMUSG00000047842	Diras2	DIRAS family, GTP-binding RAS-like 2	11.2373	0	12.2373	3.61321	0.042518	0.901516
ENSMUSG00000057596	Trim30d	tripartite motif-containing 30D	289.909	159.714	1.81011	0.856074	0.0426854	0.903154
ENSMUSG00000020684	Rasl10b	RAS-like, family 10, member B	69.0711	27.2748	2.47822	1.3093	0.0439418	0.907267
ENSMUSG00000034993	Vat1	vesicle amine transport 1	949.714	594.517	1.59645	0.674868	0.0436485	0.907267
ENSMUSG00000021094	Dhrs7	dehydrogenase/reductase (SDR family) member 7	394.507	235.026	1.6757	0.74476	0.0438278	0.907267
ENSMUSG00000035184	Fam124a	family with sequence similarity 124, member A	197.923	107.806	1.82824	0.870453	0.0439229	0.907267
ENSMUSG00000063060	Sox7	SRY (sex determining region Y)-box 7	613.212	224.084	2.72881	1.44827	0.0438408	0.907267
ENSMUSG00000033088	Triobp	TRIO and F-actin binding protein	1284.33	817.621	1.57012	0.650875	0.0436086	0.907267
ENSMUSG00000035891	Cerk	ceramide kinase	763.149	470.02	1.62233	0.698066	0.0435451	0.907267
ENSMUSG00000022941	Ripply3	ripply transcriptional repressor 3	82.4485	33.315	2.43184	1.28205	0.0440046	0.907267
ENSMUSG00000044043	Pcdhb14	protocadherin beta 14	89.6844	22.5059	3.85793	1.94783	0.0434916	0.907267
ENSMUSG00000027324	Rpusd2	RNA pseudouridylate synthase domain containing 2	126.096	60.4099	2.06963	1.04938	0.043576	0.907267
ENSMUSG00000017740	Slc12a5	solute carrier family 12, member 5	176.998	95.625	1.84215	0.881392	0.0431436	0.907267
ENSMUSG00000054690	Emcn	endomucin	2930	1853.78	1.58024	0.660148	0.0438629	0.907267
ENSMUSG00000028849	Map7d1	MAP7 domain containing 1	3869.11	1878.49	2.05913	1.04203	0.0435777	0.907267
ENSMUSG00000023186	Vwa5a	von Willebrand factor A domain containing 5A	1470.83	947.887	1.55111	0.633301	0.0438437	0.907267
ENSMUSG00000032269	Htr3a	5-hydroxytryptamine (serotonin) receptor 3A	34.3301	9.06528	3.5101	1.81151	0.0435737	0.907267
ENSMUSG00000050967	Creg2	cellular repressor of E1A-stimulated genes 2	23.4178	3.7566	5.13345	2.35993	0.044094	0.908029
ENSMUSG00000047945	Marcksl1	MARCKS-like 1	1029.55	641.476	1.60403	0.681704	0.0441428	0.908099
ENSMUSG00000026640	Plxna2	plexin A2	2166.67	1388.73	1.55977	0.641338	0.0446645	0.908831
ENSMUSG00000040624	Plekhg1	pleckstrin homology domain containing, family G (with RhoGef domain) member 1	1251.85	798.331	1.56737	0.648345	0.0447675	0.908831
ENSMUSG00000021411	Pxdc1	PX domain containing 1	142.714	71.4997	1.98227	0.987152	0.044271	0.908831
ENSMUSG00000022091	Sorbs3	sorbin and SH3 domain containing 3	985.081	630.935	1.56042	0.641931	0.0447163	0.908831
ENSMUSG00000043008	Klhl6	kelch-like 6	262.505	146.768	1.78323	0.834497	0.0443136	0.908831
ENSMUSG00000026890	Lhx6	LIM homeobox protein 6	37.2647	8.99799	3.82724	1.9363	0.0443737	0.908831
ENSMUSG00000045838	A430105I19Rik	RIKEN cDNA A430105I19 gene	452.587	244.036	1.85111	0.888387	0.0447524	0.908831
ENSMUSG00000019055	Plod1	procollagen-lysine, 2-oxoglutarate 5-dioxygenase 1	785.732	489.983	1.60236	0.680199	0.0444712	0.908831
ENSMUSG00000023249	Parp3	poly (ADP-ribose) polymerase family, member 3	464.943	233.237	1.9892	0.992187	0.0446998	0.908831
ENSMUSG00000019461	Plscr3	phospholipid scramblase 3	198.722	105.433	1.8765	0.908042	0.0449158	0.909708
ENSMUSG00000028364	Tnc	tenascin C	357.868	86.943	4.08068	2.02881	0.0449613	0.909708
ENSMUSG00000040254	Sema3d	sema domain, immunoglobulin domain (Ig), short basic domain, secreted, (semaphorin) 3D	530	175.966	3.00057	1.58524	0.0451401	0.911766
ENSMUSG00000026725	Tnn	tenascin N	48.2337	11.2362	4.02363	2.0085	0.0453509	0.913136
ENSMUSG00000022947	Cbr3	carbonyl reductase 3	47.7788	13.9132	3.27085	1.70967	0.0453787	0.913136
ENSMUSG00000050050	Ccdc158	coiled-coil domain containing 158	35.7744	8.85171	3.73279	1.90026	0.0453309	0.913136
ENSMUSG00000000776	Polr3d	polymerase (RNA) III (DNA directed) polypeptide D	567.445	341.394	1.66021	0.731363	0.045547	0.913527
ENSMUSG00000027931	Npr1	natriuretic peptide receptor 1	1705.99	661.676	2.57591	1.36508	0.045592	0.913527
ENSMUSG00000029710	Ephb4	Eph receptor B4	2264.28	1460.85	1.54959	0.631891	0.045478	0.913527
ENSMUSG00000026222	Sp100	nuclear antigen Sp100	2420.91	1061.75	2.27892	1.18835	0.0457414	0.914984
ENSMUSG00000051439	Cd14	CD14 antigen	879.753	535.04	1.64307	0.716396	0.0459618	0.917061
ENSMUSG00000018001	Cyth3	cytohesin 3	1312.58	769.592	1.70464	0.769465	0.0461327	0.917061
ENSMUSG00000009281	Rarres2	retinoic acid receptor responder (tazarotene induced) 2	299.361	171.118	1.74508	0.803295	0.0460843	0.917061
ENSMUSG00000028226	Mmp16	matrix metallopeptidase 16	64.9418	23.451	2.6969	1.4313	0.0462717	0.917967
ENSMUSG00000050505	Pcdh20	protocadherin 20	11.0004	0	12.0004	3.58501	0.0464773	0.91804
ENSMUSG00000031480	Thsd1	thrombospondin, type I, domain 1	211.848	111.766	1.88752	0.916489	0.0464981	0.91804
ENSMUSG00000057530	Ece1	endothelin converting enzyme 1	4882.82	3182.7	1.53401	0.617306	0.0465802	0.918245
ENSMUSG00000030351	Tspan11	tetraspanin 11	88.2883	38.2974	2.27212	1.18404	0.0466523	0.918245
ENSMUSG00000027669	Gnb4	guanine nucleotide binding protein (G protein), beta 4	451.08	185.627	2.42237	1.27642	0.0470491	0.918961
ENSMUSG00000071176	Arhgef10	Rho guanine nucleotide exchange factor (GEF) 10	834.857	520.419	1.60304	0.680812	0.0468759	0.918961
ENSMUSG00000079481	Nhsl2	NHS-like 2	1484.94	952.624	1.5582	0.639883	0.047178	0.920454
ENSMUSG00000038179	Slamf7	SLAM family member 7	773.134	462.585	1.66989	0.739749	0.0474437	0.921836
ENSMUSG00000021708	Rasgrf2	RAS protein-specific guanine nucleotide-releasing factor 2	471.965	282.558	1.66796	0.738089	0.0478369	0.921836
ENSMUSG00000021892	Sh3bp5	SH3-domain binding protein 5 (BTK-associated)	1620.9	1070.58	1.51355	0.597938	0.047985	0.921836
ENSMUSG00000079018	Ly6c1	lymphocyte antigen 6 complex, locus C1	1890.37	670.619	2.81614	1.49372	0.0479477	0.921836
ENSMUSG00000040690	Col16a1	collagen, type XVI, alpha 1	183.936	71.4778	2.55162	1.35141	0.0478379	0.921836
ENSMUSG00000023078	Cxcl13	chemokine (C-X-C motif) ligand 13	178.134	1.19222	81.7133	6.3525	0.0477399	0.921836
ENSMUSG00000054422	Fabp1	fatty acid binding protein 1, liver	212.588	16.4775	12.2207	3.61126	0.047867	0.921836
ENSMUSG00000030000	Add2	adducin 2 (beta)	210.88	41.2099	5.01966	2.32759	0.0479764	0.921836
ENSMUSG00000049577	Zfpm1	zinc finger protein, multitype 1	461.373	272.852	1.6884	0.75566	0.0477777	0.921836
ENSMUSG00000021756	Il6st	interleukin 6 signal transducer	4147.09	2727.95	1.52003	0.604099	0.0480318	0.921852
ENSMUSG00000059791	Nrm	nurim (nuclear envelope membrane protein)	179.283	82.5004	2.15907	1.11041	0.0481696	0.923024
ENSMUSG00000086040	Wipf3	WAS/WASL interacting protein family, member 3	147.273	71.6577	2.0407	1.02907	0.048185	0.923024
ENSMUSG00000022181	C6	complement component 6	10.8096	0	11.8096	3.56189	0.0483984	0.923814
ENSMUSG00000016087	Fli1	Friend leukemia integration 1	885.08	548.955	1.61119	0.688123	0.0484107	0.923814
ENSMUSG00000078974	Sec61g	SEC61, gamma subunit	75.5586	30.2781	2.44768	1.29141	0.0484593	0.923862
ENSMUSG00000053062	Jam2	junction adhesion molecule 2	1506.35	473.011	3.18	1.66903	0.0487614	0.927856
ENSMUSG00000026727	Rsu1	Ras suppressor protein 1	936.309	590.839	1.58372	0.663319	0.0495105	0.932816
ENSMUSG00000042851	Zc3h6	zinc finger CCCH type containing 6	391.281	238.524	1.63776	0.711722	0.0494173	0.932816
ENSMUSG00000040724	Kcna2	potassium voltage-gated channel, shaker-related subfamily, member 2	49.1036	9.93128	4.5835	2.19645	0.0492404	0.932816
ENSMUSG00000036862	Dchs1	dachsous 1 (Drosophila)	645.404	393.324	1.63927	0.713055	0.0493635	0.932816
ENSMUSG00000064215	Ifi27	interferon, alpha-inducible protein 27	681.193	335.825	2.02536	1.01818	0.0499482	0.936924
ENSMUSG00000040605	Bace2	beta-site APP-cleaving enzyme 2	104.892	47.9478	2.16336	1.11327	0.0505727	0.936924
ENSMUSG00000086231	Rapgef4os3	Rap guanine nucleotide exchange factor (GEF) 4, opposite strand 3	87.3702	36.1719	2.37734	1.24935	0.0501411	0.936924
ENSMUSG00000027210	Meis2	Meis homeobox 2	3545.91	1832.24	1.93477	0.952166	0.0504054	0.936924
ENSMUSG00000059430	Actg2	actin, gamma 2, smooth muscle, enteric	22.9734	0	23.9734	4.58336	0.0503659	0.936924
ENSMUSG00000030095	Tmem43	transmembrane protein 43	514.583	314.456	1.63441	0.708768	0.0501808	0.936924
ENSMUSG00000044534	Ackr2	atypical chemokine receptor 2	92.3841	38.1628	2.38451	1.25369	0.0505485	0.936924
ENSMUSG00000027712	Anxa5	annexin A5	1759.03	1149.16	1.53025	0.613767	0.0509344	0.939753
ENSMUSG00000035373	Ccl7	chemokine (C-C motif) ligand 7	91.4849	40.322	2.23815	1.16231	0.0511783	0.940744
ENSMUSG00000034040	Wbscr17	Williams-Beuren syndrome chromosome region 17 homolog (human)	38.9144	7.26598	4.82875	2.27165	0.0511897	0.940744
ENSMUSG00000001119	Col6a1	collagen, type VI, alpha 1	651.633	201.25	3.22686	1.69013	0.0513533	0.941414
ENSMUSG00000073144	4930599N23Rik	RIKEN cDNA 4930599N23 gene	91.7804	42.4475	2.13546	1.09455	0.0515587	0.944315
ENSMUSG00000020241	Col6a2	collagen, type VI, alpha 2	1008.23	244.981	4.10288	2.03664	0.0516094	0.944382
ENSMUSG00000048960	Prex2	phosphatidylinositol-3,4,5-trisphosphate-dependent Rac exchange factor 2	2870.94	1456.74	1.97014	0.978296	0.0522612	0.948642
ENSMUSG00000009418	Nav1	neuron navigator 1	1588.86	1033.27	1.53719	0.620294	0.0523077	0.948642
ENSMUSG00000016128	Stard13	StAR-related lipid transfer (START) domain containing 13	634.766	393.773	1.61046	0.687473	0.0521562	0.948642
ENSMUSG00000046269	Usp27x	ubiquitin specific peptidase 27, X chromosome	175.83	59.1503	2.93981	1.55572	0.0521593	0.948642
ENSMUSG00000040147	Maob	monoamine oxidase B	69.0124	25.262	2.66593	1.41464	0.0522884	0.948642
ENSMUSG00000052676	Zmat1	zinc finger, matrin type 1	356.346	214.972	1.65459	0.726478	0.0521632	0.948642
ENSMUSG00000060519	Tor3a	torsin family 3, member A	661.622	413.388	1.59904	0.677202	0.0524479	0.950179
ENSMUSG00000010047	Hyal2	hyaluronoglucosaminidase 2	639.589	409.304	1.56126	0.642707	0.0527332	0.952763
ENSMUSG00000064272	Gpbar1	G protein-coupled bile acid receptor 1	46.4646	14.273	3.10774	1.63586	0.0531392	0.956196
ENSMUSG00000000531	Grasp	GRP1 (general receptor for phosphoinositides 1)-associated scaffold protein	687.942	434.443	1.58216	0.661899	0.053347	0.956196
ENSMUSG00000045551	Fpr1	formyl peptide receptor 1	19.3471	2.38445	6.01195	2.58783	0.053247	0.956196
ENSMUSG00000028073	Pear1	platelet endothelial aggregation receptor 1	635.951	268.837	2.3605	1.23909	0.0535688	0.958356
ENSMUSG00000017652	Cd40	CD40 antigen	266.946	103.96	2.55283	1.3521	0.0538249	0.959511
ENSMUSG00000053819	Camk2d	calcium/calmodulin-dependent protein kinase II, delta	1487.15	968.91	1.53432	0.617598	0.0538747	0.959545
ENSMUSG00000003282	Plag1	pleiomorphic adenoma gene 1	138.616	72.0395	1.91151	0.934715	0.0541112	0.962046
ENSMUSG00000033467	Crlf2	cytokine receptor-like factor 2	222.932	125.589	1.76898	0.822915	0.05409	0.962046
ENSMUSG00000034612	Chst11	carbohydrate sulfotransferase 11	597.629	337.185	1.77012	0.823849	0.0542208	0.962254
ENSMUSG00000022057	Adamdec1	ADAM-like, decysin 1	19.1417	1.01229	10.0093	3.32327	0.0543594	0.962254
ENSMUSG00000022297	Fzd6	frizzled class receptor 6	517.21	323.149	1.59868	0.676877	0.054363	0.962254
ENSMUSG00000023961	Enpp4	ectonucleotide pyrophosphatase/phosphodiesterase 4	718.301	457.163	1.56997	0.650735	0.054268	0.962254
ENSMUSG00000027230	Creb3l1	cAMP responsive element binding protein 3-like 1	195.924	103.421	1.88587	0.91523	0.054474	0.963367
ENSMUSG00000026417	Pigr	polymeric immunoglobulin receptor	3252.94	1500.75	2.16676	1.11554	0.0547734	0.965499
ENSMUSG00000044847	Lsm11	U7 snRNP-specific Sm-like protein LSM11	97.9598	45.0909	2.14706	1.10236	0.0548034	0.965499
ENSMUSG00000076731	Ighv8-12	immunoglobulin heavy variable V8-12	14.8782	0	15.8782	3.98898	0.0548216	0.965499
ENSMUSG00000063605	Ccdc102a	coiled-coil domain containing 102A	240.405	130.009	1.84266	0.881788	0.0546728	0.965499
ENSMUSG00000035212	Leprot	leptin receptor overlapping transcript	437.627	262.909	1.66204	0.732951	0.0551433	0.966672
ENSMUSG00000041272	Tox	thymocyte selection-associated high mobility group box	85.2175	35.126	2.38658	1.25495	0.0552999	0.967724
ENSMUSG00000024395	Lims2	LIM and senescent cell antigen like domains 2	689.28	441.045	1.56156	0.642988	0.0553957	0.968555
ENSMUSG00000026458	Ppfia4	protein tyrosine phosphatase, receptor type, f polypeptide (PTPRF), interacting protein (liprin), alpha 4	124.035	42.4929	2.87485	1.52349	0.0555405	0.969357
ENSMUSG00000030217	Art4	ADP-ribosyltransferase 4	79.6754	36.7	2.13993	1.09756	0.0555867	0.969357
ENSMUSG00000033987	Dnah17	dynein, axonemal, heavy chain 17	69.853	27.5338	2.48313	1.31216	0.0559215	0.972656
ENSMUSG00000053332	Gas5	growth arrest specific 5	634.263	400.948	1.58046	0.660345	0.0565916	0.975815
ENSMUSG00000020676	Ccl11	chemokine (C-C motif) ligand 11	24.0361	3.54303	5.5109	2.46229	0.0566389	0.975815
ENSMUSG00000051316	Taf7	TATA-box binding protein associated factor 7	796.129	510.532	1.55832	0.63999	0.0564712	0.975815
ENSMUSG00000062960	Kdr	kinase insert domain protein receptor	7957.01	5220.73	1.52402	0.607881	0.0565552	0.975815
ENSMUSG00000037649	H2-DMa	histocompatibility 2, class II, locus DMa	468.861	285.382	1.64068	0.714294	0.0567814	0.976422
ENSMUSG00000036053	Fmnl2	formin-like 2	934.242	591.367	1.57882	0.658847	0.0568486	0.976422
ENSMUSG00000006931	P3h4	prolyl 3-hydroxylase family member 4 (non-enzymatic)	148.744	75.0881	1.96804	0.97676	0.0573891	0.984508
ENSMUSG00000050493	Fam167b	family with sequence similarity 167, member B	320.521	136.386	2.34027	1.22668	0.0576884	0.987107
ENSMUSG00000017765	Slc12a4	solute carrier family 12, member 4	669.75	323.691	2.06581	1.04671	0.0579066	0.989152
ENSMUSG00000036206	Sh3bp4	SH3-domain binding protein 4	1200.07	798.306	1.50264	0.587501	0.0584451	0.993115
ENSMUSG00000076612	Ighg2c	immunoglobulin heavy constant gamma 2C	1389.48	114.569	12.0316	3.58876	0.0585028	0.993115
ENSMUSG00000035506	Slc12a8	solute carrier family 12 (potassium/chloride transporters), member 8	29.0354	6.28733	4.12159	2.0432	0.0585352	0.993115
ENSMUSG00000015476	Prrt1	proline-rich transmembrane protein 1	46.0684	15.8588	2.79192	1.48126	0.0585106	0.993115
ENSMUSG00000039156	Stim2	stromal interaction molecule 2	1063.2	677.232	1.56908	0.649922	0.059143	0.995839
ENSMUSG00000008129	4930432K21Rik	RIKEN cDNA 4930432K21 gene	18.9635	2.20452	6.22982	2.63919	0.0589003	0.995839
ENSMUSG00000069892	9930111J21Rik2	RIKEN cDNA 9930111J21 gene 2	1178.37	764.387	1.54089	0.623759	0.059307	0.997604
ENSMUSG00000001029	Icam2	intercellular adhesion molecule 2	1067.79	435.997	2.44575	1.29028	0.0593474	0.997604
ENSMUSG00000020363	Gfpt2	glutamine fructose-6-phosphate transaminase 2	126.274	63.2668	1.9804	0.985793	0.0595837	0.999062
ENSMUSG00000051951	Xkr4	X-linked Kx blood group related 4	28.046	4.76889	5.03494	2.33197	0.185404	1
ENSMUSG00000025902	Sox17	SRY (sex determining region Y)-box 17	1065.58	536.999	1.98249	0.987312	0.0996344	1
ENSMUSG00000033813	Tcea1	transcription elongation factor A (SII) 1	335.183	294.817	1.13646	0.184543	0.590082	1
ENSMUSG00000033740	St18	suppression of tumorigenicity 18	18.6847	4.26274	3.74039	1.90319	0.259231	1
ENSMUSG00000048538	Gm9826	predicted gene 9826	92.6125	88.8988	1.04131	0.0583985	0.895352	1
ENSMUSG00000086235	Gm16284	predicted gene 16284	20.6886	10.8763	1.82621	0.868856	0.453282	1
ENSMUSG00000025912	Mybl1	myeloblastosis oncogene-like 1	43.5447	28.6923	1.50021	0.585162	0.494777	1
ENSMUSG00000045210	Vcpip1	valosin containing protein (p97)/p47 complex interacting protein 1	942.14	790.368	1.19179	0.253124	0.434258	1
ENSMUSG00000046101	Mcmdc2	minichromosome maintenance domain containing 2	30.8632	28.0399	1.09722	0.133854	0.928263	1
ENSMUSG00000025938	Slco5a1	solute carrier organic anion transporter family, member 5A1	17.7247	6.32097	2.55769	1.35484	0.247301	1
ENSMUSG00000005886	Ncoa2	nuclear receptor coactivator 2	2280.01	2244.51	1.01581	0.0226296	0.942252	1
ENSMUSG00000025935	Tram1	translocating chain-associating membrane protein 1	1192.46	1166.31	1.0224	0.0319638	0.909919	1
ENSMUSG00000082193	Rpl5-ps1	ribosomal protein L5, pseudogene 1	30.2008	18.7157	1.58254	0.662238	0.462366	1
ENSMUSG00000025925	Terf1	telomeric repeat binding factor 1	172.34	152.369	1.13022	0.176601	0.708526	1
ENSMUSG00000043716	Rpl7	ribosomal protein L7	902.687	819.196	1.10179	0.139854	0.697132	1
ENSMUSG00000025939	Ube2w	ubiquitin-conjugating enzyme E2W (putative)	330.125	283.053	1.16572	0.221219	0.561732	1
ENSMUSG00000079658	Tceb1	transcription elongation factor B (SIII), polypeptide 1	263.59	219.167	1.20177	0.265162	0.491309	1
ENSMUSG00000091020	Gm5828	predicted gene 5828	55.3877	44.8773	1.2291	0.297599	0.681856	1
ENSMUSG00000042686	Jph1	junctophilin 1	35.8037	18.6031	1.87745	0.908773	0.246599	1
ENSMUSG00000067780	Pi15	peptidase inhibitor 15	389.056	55.2928	6.92905	2.79266	0.276851	1
ENSMUSG00000085125	Gm16070	predicted gene 16070	72.5507	31.2567	2.28017	1.18914	0.0796044	1
ENSMUSG00000025931	Paqr8	progestin and adipoQ receptor family member VIII	61.609	43.2916	1.41356	0.499337	0.503742	1
ENSMUSG00000041809	Efhc1	EF-hand domain (C-terminal) containing 1	21.4998	7.83941	2.5454	1.34789	0.225054	1
ENSMUSG00000041779	Tram2	translocating chain-associating membrane protein 2	312.147	200.912	1.55091	0.633112	0.0931975	1
ENSMUSG00000025933	Tmem14a	transmembrane protein 14A	22.5772	14.3857	1.53241	0.615806	0.647008	1
ENSMUSG00000028033	Kcnq5	potassium voltage-gated channel, subfamily Q, member 5	19.169	13.5533	1.38587	0.470791	0.842316	1
ENSMUSG00000065567	Mir30c-2	microRNA 30c-2	14.3332	8.19927	1.66679	0.73707	0.523737	1
ENSMUSG00000026158	Ogfrl1	opioid growth factor receptor-like 1	322.294	267.7	1.20318	0.266851	0.495038	1
ENSMUSG00000026154	Sdhaf4	succinate dehydrogenase complex assembly factor 4	100.984	99.1461	1.01836	0.0262423	0.978272	1
ENSMUSG00000026141	Col19a1	collagen, type XIX, alpha 1	170.691	30.9978	5.36571	2.42377	0.354995	1
ENSMUSG00000067736	Gm10222	predicted gene 10222	961.811	105.356	9.05272	3.17835	0.367176	1
ENSMUSG00000073725	Lmbrd1	LMBR1 domain containing 1	1213.8	1172.43	1.03526	0.0499903	0.88216	1
ENSMUSG00000086240	Gm7846	predicted gene 7846	23.6986	10.8426	2.08557	1.06044	0.480436	1
ENSMUSG00000026064	Ptp4a1	protein tyrosine phosphatase 4a1	329.853	304.129	1.0843	0.116769	0.778223	1
ENSMUSG00000026134	Prim2	DNA primase, p58 subunit	82.283	66.0228	1.24261	0.313369	0.674874	1
ENSMUSG00000004768	Rab23	RAB23, member RAS oncogene family	299.157	227.862	1.31152	0.391239	0.358608	1
ENSMUSG00000042215	Bag2	BCL2-associated athanogene 2	219.748	199.597	1.10046	0.138101	0.775528	1
ENSMUSG00000042197	Zfp451	zinc finger protein 451	924.891	785.577	1.17711	0.235255	0.480188	1
ENSMUSG00000081402	Gm15455	predicted gene 15455	176.382	160.849	1.09597	0.132207	0.733186	1
ENSMUSG00000092852	Mir5103	microRNA 5103	4.18803	1.8783	1.80247	0.849971	0.732078	1
ENSMUSG00000037509	Arhgef4	Rho guanine nucleotide exchange factor (GEF) 4	118.487	116.118	1.02023	0.0288896	0.917866	1
ENSMUSG00000037503	Fam168b	family with sequence similarity 168, member B	1294.01	1238.44	1.04483	0.0632738	0.823146	1
ENSMUSG00000037470	Uggt1	UDP-glucose glycoprotein glucosyltransferase 1	2440.11	1907.19	1.27928	0.355332	0.259774	1
ENSMUSG00000047180	Neurl3	neuralized E3 ubiquitin protein ligase 3	508.853	373.066	1.363	0.446786	0.217812	1
ENSMUSG00000037447	Arid5a	AT rich interactive domain 5A (MRF1-like)	2257.82	853.871	2.64229	1.40179	0.320555	1
ENSMUSG00000079610	Ankrd39	ankyrin repeat domain 39	70.5468	65.3923	1.07764	0.107871	0.821685	1
ENSMUSG00000087589	D430040D24Rik	RIKEN cDNA D430040D24 gene	9.74693	5.24139	1.72188	0.783985	0.71017	1
ENSMUSG00000026116	Tmem131	transmembrane protein 131	2081.01	1814.69	1.14668	0.197457	0.522797	1
ENSMUSG00000026113	Inpp4a	inositol polyphosphate-4-phosphatase, type I	756.706	538.639	1.4041	0.489643	0.331036	1
ENSMUSG00000086064	4930439A04Rik	RIKEN cDNA 4930439A04 gene	20.8501	12.3947	1.63124	0.705972	0.661994	1
ENSMUSG00000026111	Unc50	unc-50 homolog (C. elegans)	291.479	241.989	1.20367	0.267443	0.53764	1
ENSMUSG00000060771	Tsga10	testis specific 10	243.254	153.629	1.57962	0.659576	0.111766	1
ENSMUSG00000026088	Mitd1	MIT, microtubule interacting and transport, domain containing 1	167.884	108.785	1.53832	0.621354	0.164168	1
ENSMUSG00000058407	Txndc9	thioredoxin domain containing 9	500.46	477.632	1.04769	0.0672162	0.807636	1
ENSMUSG00000026083	Eif5b	eukaryotic translation initiation factor 5B	3263.38	3191.9	1.02239	0.0319427	0.877515	1
ENSMUSG00000026082	Rev1	REV1, DNA directed polymerase	351.214	332.677	1.05555	0.0780012	0.879002	1
ENSMUSG00000048814	Lonrf2	LON peptidase N-terminal domain and ring finger 2	14.3626	6.82712	1.96274	0.972867	0.435208	1
ENSMUSG00000026080	Chst10	carbohydrate sulfotransferase 10	12.2539	7.5922	1.54255	0.625316	0.786416	1
ENSMUSG00000026078	Pdcl3	phosducin-like 3	279.452	273.863	1.02033	0.0290401	0.927276	1
ENSMUSG00000026077	Npas2	neuronal PAS domain protein 2	201.602	66.0565	3.02137	1.5952	0.267482	1
ENSMUSG00000092563	Gm3617	predicted gene 3617	8.43476	8.31192	1.01319	0.0189082	1	1
ENSMUSG00000073702	Rpl31	ribosomal protein L31	51.185	31.0768	1.62688	0.702105	0.361937	1
ENSMUSG00000085894	Gm15832	predicted gene 15832	22.6359	20.9539	1.07662	0.106507	0.898254	1
ENSMUSG00000064936	Gm23722	predicted gene, 23722	8.74498	3.90288	1.9876	0.991028	0.594293	1
ENSMUSG00000026074	Map4k4	mitogen-activated protein kinase kinase kinase kinase 4	3068.9	2018.63	1.52003	0.604096	0.240609	1
ENSMUSG00000026072	Il1r1	interleukin 1 receptor, type I	322.835	173.03	1.8608	0.895921	0.0690879	1
ENSMUSG00000026070	Il18r1	interleukin 18 receptor 1	97.0312	78.3268	1.23579	0.305432	0.534351	1
ENSMUSG00000041945	Mfsd9	major facilitator superfamily domain containing 9	173.258	166.743	1.03884	0.0549759	0.885007	1
ENSMUSG00000079588	Tmem182	transmembrane protein 182	124.436	18.4231	6.45807	2.6911	0.263824	1
ENSMUSG00000093436	Gm20646	predicted gene 20646	16.4126	6.1074	2.44992	1.29274	0.3462	1
ENSMUSG00000041907	Gpr45	G protein-coupled receptor 45	5.98651	3.03688	1.73067	0.791331	0.826329	1
ENSMUSG00000008136	Fhl2	four and a half LIM domains 2	292.299	99.3597	2.92248	1.54719	0.375664	1
ENSMUSG00000066877	Nck2	non-catalytic region of tyrosine kinase adaptor protein 2	290.842	244.631	1.18813	0.248695	0.485334	1
ENSMUSG00000026051	1500015O10Rik	RIKEN cDNA 1500015O10 gene	3.76043	3.57667	1.04015	0.0567929	1	1
ENSMUSG00000057363	Uxs1	UDP-glucuronate decarboxylase 1	375.181	359.826	1.04256	0.0601245	0.764951	1
ENSMUSG00000090243	Gm16103	predicted gene 16103	2.91988	2.56437	1.09974	0.137162	0.987868	1
ENSMUSG00000041763	Tpp2	tripeptidyl peptidase II	1073.76	898.761	1.1945	0.256401	0.455028	1
ENSMUSG00000047343	Mettl21c	methyltransferase like 21C	39.9184	29.5803	1.33806	0.420148	0.479339	1
ENSMUSG00000091844	Gm8251	predicted gene 8251	9.77628	4.76889	1.868	0.901494	0.578373	1
ENSMUSG00000026042	Col5a2	collagen, type V, alpha 2	1148.51	689.791	1.66405	0.7347	0.311597	1
ENSMUSG00000025995	Wdr75	WD repeat domain 75	203.971	163.651	1.24488	0.316011	0.502481	1
ENSMUSG00000084817	Gm5526	predicted pseudogene 5526	741.528	441.349	1.6786	0.747259	0.271816	1
ENSMUSG00000025993	Slc40a1	solute carrier family 40 (iron-regulated transporter), member 1	551.602	536.49	1.02812	0.0400041	0.895882	1
ENSMUSG00000025986	Slc39a10	solute carrier family 39 (zinc transporter), member 10	602.897	532.644	1.13165	0.178424	0.603518	1
ENSMUSG00000026109	Tmeff2	transmembrane protein with EGF-like and two follistatin-like domains 2	82.9873	7.77213	9.57434	3.25917	0.185244	1
ENSMUSG00000045954	Sdpr	serum deprivation response	2306.87	1584.53	1.45559	0.541602	0.0826794	1
ENSMUSG00000018417	Myo1b	myosin IB	618.236	289.431	2.13213	1.0923	0.168548	1
ENSMUSG00000062939	Stat4	signal transducer and activator of transcription 4	67.1553	48.9046	1.36571	0.449654	0.71483	1
ENSMUSG00000026104	Stat1	signal transducer and activator of transcription 1	4529.21	1549.72	2.92137	1.54664	0.252532	1
ENSMUSG00000002881	Nab1	Ngfi-A binding protein 1	1576.67	1207.63	1.30534	0.384426	0.282779	1
ENSMUSG00000043015	Nemp2	nuclear envelope integral membrane protein 2	73.3912	61.782	1.18491	0.244782	0.671007	1
ENSMUSG00000041439	Mfsd6	major facilitator superfamily domain containing 6	875.354	725.426	1.20639	0.270698	0.550073	1
ENSMUSG00000026102	Inpp1	inositol polyphosphate-1-phosphatase	156.219	137.635	1.13405	0.181484	0.772505	1
ENSMUSG00000043629	1700019D03Rik	RIKEN cDNA 1700019D03 gene	19.0809	15.2853	1.23307	0.302254	0.839133	1
ENSMUSG00000026096	Osgepl1	O-sialoglycoprotein endopeptidase-like 1	146.726	135.227	1.08441	0.116906	0.745319	1
ENSMUSG00000042807	Hecw2	HECT, C2 and WW domain containing E3 ubiquitin protein ligase 2	1198.4	1111.87	1.07776	0.108034	0.760259	1
ENSMUSG00000025983	Ccdc150	coiled-coil domain containing 150	11.3253	3.39674	2.80328	1.48712	0.361763	1
ENSMUSG00000041303	Gtf3c3	general transcription factor IIIC, polypeptide 3	283.323	276.125	1.02598	0.0369969	0.95549	1
ENSMUSG00000052331	Ankrd44	ankyrin repeat domain 44	923.596	894.025	1.03304	0.0468944	0.918474	1
ENSMUSG00000025982	Sf3b1	splicing factor 3b, subunit 1	3902.38	3777.84	1.03296	0.0467783	0.889634	1
ENSMUSG00000025981	Coq10b	coenzyme Q10B	332.322	293.66	1.13121	0.177866	0.696758	1
ENSMUSG00000089670	Gm16581	predicted gene 16581	119.015	117.963	1.00885	0.012708	0.965899	1
ENSMUSG00000025979	Mob4	MOB family member 4, phocein	304.41	293.3	1.03775	0.0534604	0.956393	1
ENSMUSG00000025978	Rftn2	raftlin family member 2	137.738	52.6831	2.58439	1.36982	0.389336	1
ENSMUSG00000038349	Plcl1	phospholipase C-like 1	791.499	709.947	1.11471	0.156666	0.603764	1
ENSMUSG00000038331	Satb2	special AT-rich sequence binding protein 2	288.31	287.743	1.00196	0.00283149	0.9731	1
ENSMUSG00000038305	Spats2l	spermatogenesis associated, serine-rich 2-like	369.197	233.755	1.57695	0.657139	0.141565	1
ENSMUSG00000026039	Sgol2a	shugoshin-like 2a (S. pombe)	4.20271	2.71066	1.4021	0.487586	0.910814	1
ENSMUSG00000063558	Aox1	aldehyde oxidase 1	49.2964	21.7189	2.21385	1.14656	0.159943	1
ENSMUSG00000051223	Bzw1	basic leucine zipper and W2 domains 1	1341.88	1265.6	1.06023	0.0843746	0.813801	1
ENSMUSG00000085054	Gm15834	predicted gene 15834	19.0222	14.6329	1.28078	0.357019	0.758875	1
ENSMUSG00000059647	Cbx3-ps7	chromobox 3, pseudogene 7	80.8408	45.0236	1.77823	0.830446	0.185417	1
ENSMUSG00000026031	Cflar	CASP8 and FADD-like apoptosis regulator	2551.46	2078.51	1.22743	0.295643	0.373085	1
ENSMUSG00000026029	Casp8	caspase 8	927.84	692.447	1.33945	0.421644	0.191776	1
ENSMUSG00000026023	Cdk15	cyclin-dependent kinase 15	11.1178	3.54303	2.66734	1.4154	0.647768	1
ENSMUSG00000041075	Fzd7	frizzled class receptor 7	1333.87	645.85	2.06365	1.0452	0.405874	1
ENSMUSG00000047361	Gm973	predicted gene 973	36.0972	10.6964	3.17169	1.66525	0.281005	1
ENSMUSG00000026021	Sumo1	small ubiquitin-like modifier 1	446.711	437.389	1.02126	0.0303558	0.902353	1
ENSMUSG00000026020	Nop58	NOP58 ribonucleoprotein	1295.02	787.993	1.64263	0.716005	0.377501	1
ENSMUSG00000067336	Bmpr2	bone morphogenetic protein receptor, type II (serine/threonine kinase)	2879.57	1933.07	1.48938	0.574716	0.0958346	1
ENSMUSG00000041040	Fam117b	family with sequence similarity 117, member B	2516.08	1964.73	1.28048	0.356688	0.267537	1
ENSMUSG00000026018	Ica1l	islet cell autoantigen 1-like	147.33	125.353	1.17393	0.231345	0.692679	1
ENSMUSG00000073664	Nbeal1	neurobeachin like 1	2460.6	1818.61	1.35282	0.435969	0.290353	1
ENSMUSG00000049439	Cyp20a1	cytochrome P450, family 20, subfamily a, polypeptide 1	382.639	263.865	1.44844	0.534496	0.148973	1
ENSMUSG00000026782	Abi2	abl-interactor 2	822.961	671.561	1.22511	0.292912	0.364792	1
ENSMUSG00000026014	Raph1	Ras association (RalGDS/AF-6) and pleckstrin homology domains 1	317.146	278.442	1.13851	0.187142	0.668683	1
ENSMUSG00000081562	Gm11575	predicted gene 11575	4.24673	2.02459	1.73469	0.794681	0.833484	1
ENSMUSG00000085842	Pard3bos1	par-3 family cell polarity regulator beta, opposite strand 1	19.5819	15.5779	1.24153	0.312116	0.929863	1
ENSMUSG00000085400	Pard3bos3	par-3 family cell polarity regulator beta, opposite strand 3	11.6208	1.01229	6.27187	2.6489	0.206167	1
ENSMUSG00000040865	Ino80d	INO80 complex subunit D	2186.4	2030.85	1.07655	0.106419	0.798359	1
ENSMUSG00000084799	Ino80dos	INO80 complex subunit D, opposite strand	26.411	16.3313	1.58159	0.66138	0.493802	1
ENSMUSG00000064612	Gm26457	predicted gene, 26457	8.80367	4.58896	1.75411	0.810742	0.651901	1
ENSMUSG00000046856	Gpr1	G protein-coupled receptor 1	8.86237	4.76889	1.70958	0.773641	0.64618	1
ENSMUSG00000027520	Zdbf2	zinc finger, DBF-type containing 2	18.1817	8.4582	2.02805	1.02009	0.470033	1
ENSMUSG00000025964	Adam23	a disintegrin and metallopeptidase domain 23	85.4585	53.6281	1.58267	0.662364	0.503441	1
ENSMUSG00000044689	Gm13749	predicted gene 13749	9.5415	1.69837	3.90662	1.96592	0.301284	1
ENSMUSG00000086836	Gm13748	predicted gene 13748	27.958	18.6484	1.47381	0.559548	0.653355	1
ENSMUSG00000025958	Creb1	cAMP responsive element binding protein 1	1101.25	932.514	1.18075	0.239705	0.490482	1
ENSMUSG00000025956	Mettl21a	methyltransferase like 21A	95.6709	75.4362	1.26473	0.338824	0.631596	1
ENSMUSG00000070871	Ccnyl1	cyclin Y-like 1	471.557	310.879	1.51519	0.599501	0.452928	1
ENSMUSG00000045005	Fzd5	frizzled class receptor 5	788.16	618.99	1.27286	0.348072	0.443509	1
ENSMUSG00000051344	Plekhm3	pleckstrin homology domain containing, family M, member 3	609.225	608.834	1.00064	0.000925188	0.984727	1
ENSMUSG00000025949	Pikfyve	phosphoinositide kinase, FYVE finger containing	1085.82	1067.29	1.01734	0.0248086	0.948353	1
ENSMUSG00000083289	Gm8812	predicted gene 8812	3.7751	1.51844	1.89605	0.923001	0.799849	1
ENSMUSG00000015222	Map2	microtubule-associated protein 2	375.81	322.194	1.16589	0.221437	0.803794	1
ENSMUSG00000055567	Unc80	unc-80, NALCN activator	13.5367	7.00705	1.81549	0.860358	0.478748	1
ENSMUSG00000082057	Gm15789	predicted gene 15789	43.9429	39.4896	1.10999	0.150542	0.835978	1
ENSMUSG00000026003	Acadl	acyl-Coenzyme A dehydrogenase, long-chain	2863.96	2760.83	1.03734	0.0528898	0.868516	1
ENSMUSG00000082769	Gm15793	predicted gene 15793	51.0068	28.3998	1.76895	0.822896	0.266349	1
ENSMUSG00000026000	Lancl1	LanC (bacterial lantibiotic synthetase component C)-like 1	222.312	183.918	1.20762	0.272171	0.555313	1
ENSMUSG00000026196	Bard1	BRCA1 associated RING domain 1	35.5983	26.9486	1.30948	0.388999	0.568717	1
ENSMUSG00000026192	Atic	5-aminoimidazole-4-carboxamide ribonucleotide formyltransferase/IMP cyclohydrolase	284.162	248.164	1.14448	0.194686	0.66205	1
ENSMUSG00000026193	Fn1	fibronectin 1	3009.88	1028.6	2.92432	1.5481	0.0979318	1
ENSMUSG00000039354	Smarcal1	SWI/SNF related matrix associated, actin dependent regulator of chromatin, subfamily a-like 1	666.174	486.025	1.3699	0.454068	0.197314	1
ENSMUSG00000039323	Igfbp2	insulin-like growth factor binding protein 2	29.6537	7.44591	3.62942	1.85974	0.158111	1
ENSMUSG00000026185	Igfbp5	insulin-like growth factor binding protein 5	17710	14622.6	1.21113	0.276353	0.398781	1
ENSMUSG00000006304	Arpc2	actin related protein 2/3 complex, subunit 2	2692.63	2271.73	1.1852	0.24513	0.464117	1
ENSMUSG00000006301	Tmbim1	transmembrane BAX inhibitor motif containing 1	1268.09	694.023	1.82597	0.86866	0.230018	1
ENSMUSG00000073650	Catip	ciliogenesis associated TTC17 interacting protein	8.02183	1.37215	3.80323	1.92722	0.289384	1
ENSMUSG00000026177	Slc11a1	solute carrier family 11 (proton-coupled divalent metal ion transporters), member 1	391.615	264.843	1.47687	0.562538	0.289913	1
ENSMUSG00000033364	Usp37	ubiquitin specific peptidase 37	557.669	474.619	1.17462	0.232188	0.506271	1
ENSMUSG00000026135	Zfp142	zinc finger protein 142	622.173	555.994	1.11881	0.16197	0.64844	1
ENSMUSG00000026162	Nhej1	nonhomologous end-joining factor 1	34.4329	30.2664	1.13326	0.180477	0.718137	1
ENSMUSG00000026205	Slc23a3	solute carrier family 23 (nucleobase transporters), member 3	41.6749	20.3804	1.99598	0.997097	0.321638	1
ENSMUSG00000026203	Dnajb2	DnaJ heat shock protein family (Hsp40) member B2	258.338	210.226	1.22777	0.296043	0.508683	1
ENSMUSG00000026204	Ptprn	protein tyrosine phosphatase, receptor type, N	24.1242	10.5837	2.16892	1.11698	0.256432	1
ENSMUSG00000026209	Dnpep	aspartyl aminopeptidase	408.044	360.414	1.13179	0.178604	0.71769	1
ENSMUSG00000026208	Des	desmin	601.703	119.369	5.00714	2.32399	0.25315	1
ENSMUSG00000026207	Speg	SPEG complex locus	679.443	293.996	2.30662	1.20578	0.426275	1
ENSMUSG00000033007	Asic4	acid-sensing (proton-gated) ion channel family member 4	16.1464	2.38445	5.06623	2.34091	0.177543	1
ENSMUSG00000032997	Chpf	chondroitin polymerizing factor	251.498	162.84	1.54112	0.623984	0.124997	1
ENSMUSG00000026211	Obsl1	obscurin-like 1	152.75	54.7077	2.75995	1.46464	0.27552	1
ENSMUSG00000051703	Tmem198	transmembrane protein 198	8.0365	7.44591	1.06993	0.0975117	1	1
ENSMUSG00000032968	Inha	inhibin alpha	14.3186	1.19222	6.98768	2.80481	0.0725624	1
ENSMUSG00000006576	Slc4a3	solute carrier family 4 (anion exchanger), member 3	793.862	410.035	1.9338	0.951441	0.402884	1
ENSMUSG00000026235	Epha4	Eph receptor A4	469.976	303.04	1.54906	0.631394	0.0860078	1
ENSMUSG00000026245	Farsb	phenylalanyl-tRNA synthetase, beta subunit	303.362	258.69	1.17202	0.228996	0.526664	1
ENSMUSG00000090486	BC035947	cDNA sequence BC035947	172.233	154.495	1.11408	0.155852	0.881217	1
ENSMUSG00000047330	Kcne4	potassium voltage-gated channel, Isk-related subfamily, gene 4	68.6268	18.2886	3.60975	1.8519	0.154748	1
ENSMUSG00000072978	Gm5830	predicted pseudogene 5830	87.06	62.6699	1.38307	0.467875	0.492062	1
ENSMUSG00000026249	Serpine2	serine (or cysteine) peptidase inhibitor, clade E, member 2	1837.75	228.886	7.99854	2.99974	0.124185	1
ENSMUSG00000043230	Fam124b	family with sequence similarity 124, member B	14.7608	7.15334	1.93305	0.950882	0.462373	1
ENSMUSG00000087008	Gm5530	predicted gene 5530	92.6189	79.9916	1.15591	0.209029	0.730004	1
ENSMUSG00000026142	Rhbdd1	rhomboid domain containing 1	310.791	199.427	1.55563	0.637499	0.0878932	1
ENSMUSG00000026159	Agfg1	ArfGAP with FG repeats 1	585.308	513.187	1.14026	0.189367	0.607513	1
ENSMUSG00000026219	Trip12	thyroid hormone receptor interactor 12	5597.84	5573.67	1.00434	0.00624071	0.989338	1
ENSMUSG00000061852	Gm7582	predicted gene 7582	9.36335	0	10.3633	3.37342	0.119259	1
ENSMUSG00000089844	A530032D15Rik	RIKEN cDNA A530032D15Rik gene	25.2309	11.3824	2.1184	1.08297	0.310534	1
ENSMUSG00000072109	A530040E14Rik	RIKEN cDNA A530040E14 gene	29.1821	19.728	1.4561	0.542113	0.566616	1
ENSMUSG00000089716	Gm6264	predicted gene 6264	5.82509	0	6.82509	2.77085	0.223054	1
ENSMUSG00000089652	Gm16025	predicted gene 16025	12.7989	0	13.7989	3.78648	0.165422	1
ENSMUSG00000089714	Gm16092	predicted gene 16092	8.46411	1.01229	4.70315	2.23363	0.275244	1
ENSMUSG00000070034	Sp110	Sp110 nuclear body protein	581.877	292.782	1.98405	0.988445	0.0930085	1
ENSMUSG00000090103	Gm16094	predicted gene 16094	7.57955	7.00705	1.0715	0.099631	0.932514	1
ENSMUSG00000070031	Sp140	Sp140 nuclear body protein	247.937	102.037	2.416	1.27262	0.146488	1
ENSMUSG00000090246	Gm17017	predicted gene 17017	24.0215	11.8096	1.95334	0.965943	0.278298	1
ENSMUSG00000052760	A630001G21Rik	RIKEN cDNA A630001G21 gene	122.56	117.581	1.04199	0.0593357	0.958329	1
ENSMUSG00000036707	Cab39	calcium binding protein 39	2141.52	1834.45	1.1673	0.223176	0.516536	1
ENSMUSG00000026223	Itm2c	integral membrane protein 2C	1026.33	673.779	1.52246	0.606409	0.0735274	1
ENSMUSG00000026229	Psmd1	proteasome (prosome, macropain) 26S subunit, non-ATPase, 1	1724.5	1568.27	1.09955	0.136916	0.678712	1
ENSMUSG00000026228	Htr2b	5-hydroxytryptamine (serotonin) receptor 2B	30.9973	26.3752	1.16884	0.225082	0.793713	1
ENSMUSG00000079445	B3gnt7	UDP-GlcNAc:betaGal beta-1,3-N-acetylglucosaminyltransferase 7	54.87	49.2863	1.11104	0.151907	0.868362	1
ENSMUSG00000073627	C130036L24Rik	RIKEN cDNA C130036L24 gene	18.7267	11.4497	1.58451	0.664036	0.627661	1
ENSMUSG00000026238	Ptma	prothymosin alpha	2272.85	1808.18	1.25684	0.329801	0.294116	1
ENSMUSG00000026239	Pde6d	phosphodiesterase 6D, cGMP-specific, rod, delta	142.817	126.354	1.12927	0.17539	0.729914	1
ENSMUSG00000079436	Kcnj13	potassium inwardly-rectifying channel, subfamily J, member 13	18.0056	15.6452	1.14181	0.191321	0.888537	1
ENSMUSG00000026258	3110079O15Rik	RIKEN cDNA 3110079O15 gene	6.28205	6.17469	1.01496	0.0214291	0.931816	1
ENSMUSG00000090994	Gm6153	predicted gene 6153	3.42086	3.07052	1.08607	0.119114	1	1
ENSMUSG00000026288	Inpp5d	inositol polyphosphate-5-phosphatase D	1272.17	1082.87	1.17465	0.232227	0.641574	1
ENSMUSG00000087968	Gm25395	predicted gene, 25395	339.596	309.991	1.09519	0.131186	0.781401	1
ENSMUSG00000056055	Sag	S-antigen, retina and pineal gland (arrestin)	22.6799	11.675	1.86824	0.901679	0.476031	1
ENSMUSG00000082837	Gm15373	predicted gene 15373	9.64422	8.23291	1.15286	0.205212	0.790603	1
ENSMUSG00000082513	Gm15374	predicted gene 15374	19.2738	14.9927	1.26768	0.342196	0.732592	1
ENSMUSG00000079429	Mroh2a	maestro heat-like repeat family member 2A	78.1117	50.1524	1.54659	0.62909	0.30725	1
ENSMUSG00000044783	Hjurp	Holliday junction recognition protein	658.396	443.497	1.48347	0.568972	0.088658	1
ENSMUSG00000049866	Arl4c	ADP-ribosylation factor-like 4C	539.747	456.322	1.18242	0.241745	0.578169	1
ENSMUSG00000034432	Cops8	COP9 signalosome subunit 8	382.239	334.678	1.14169	0.191165	0.591531	1
ENSMUSG00000048126	Col6a3	collagen, type VI, alpha 3	1613.23	407.405	3.95252	1.98277	0.102844	1
ENSMUSG00000026305	Lrrfip1	leucine rich repeat (in FLII) interacting protein 1	3290.99	2677.67	1.22896	0.297441	0.394258	1
ENSMUSG00000070732	Rbm44	RNA binding motif protein 44	5.95716	4.11646	1.35976	0.443354	0.770888	1
ENSMUSG00000034353	Ramp1	receptor (calcitonin) activity modifying protein 1	186.885	54.8876	3.36185	1.74925	0.266185	1
ENSMUSG00000034343	Ube2f	ubiquitin-conjugating enzyme E2F (putative)	219.557	202.061	1.08617	0.119244	0.833396	1
ENSMUSG00000083064	Gm7785	predicted gene 7785	94.3188	80.0252	1.17641	0.23439	0.626275	1
ENSMUSG00000090322	Gm17090	predicted gene 17090	5.45618	1.37215	2.72166	1.44448	0.490657	1
ENSMUSG00000049515	Espnl	espin-like	18.5506	9.24521	1.90827	0.932264	0.34934	1
ENSMUSG00000026308	Klhl30	kelch-like 30	60.0873	10.8763	5.14363	2.36279	0.317357	1
ENSMUSG00000026309	Ilkap	integrin-linked kinase-associated serine/threonine phosphatase 2C	616.343	556.546	1.10725	0.146983	0.687224	1
ENSMUSG00000026311	Asb1	ankyrin repeat and SOCS box-containing 1	237.121	226.152	1.04829	0.0680338	0.896029	1
ENSMUSG00000026313	Hdac4	histone deacetylase 4	628.249	585.112	1.0736	0.102455	0.714689	1
ENSMUSG00000034220	Gpc1	glypican 1	336.686	274.438	1.226	0.293955	0.48918	1
ENSMUSG00000034212	Ankmy1	ankyrin repeat and MYND domain containing 1	15.7775	3.03688	4.15605	2.05521	0.427849	1
ENSMUSG00000047067	Dusp28	dual specificity phosphatase 28	84.5719	78.3722	1.07811	0.108503	0.873632	1
ENSMUSG00000084989	Crocc2	ciliary rootlet coiled-coil, rootletin family member 2	4.67434	2.7443	1.51546	0.599754	0.758105	1
ENSMUSG00000047793	Sned1	sushi, nidogen and EGF-like domains 1	578.114	507.066	1.13984	0.188832	0.526956	1
ENSMUSG00000026274	Pask	PAS domain containing serine/threonine kinase	44.1651	38.3647	1.14735	0.198306	0.721827	1
ENSMUSG00000090489	Gm17415	predicted gene, 17415	26.9707	23.6309	1.13559	0.183448	0.8761	1
ENSMUSG00000026276	Sept2	septin 2	1364.2	1162.81	1.17305	0.230262	0.515392	1
ENSMUSG00000026280	Atg4b	autophagy related 4B, cysteine peptidase	457.571	378.15	1.20947	0.274378	0.448873	1
ENSMUSG00000026283	Ing5	inhibitor of growth family, member 5	517.604	373.549	1.38461	0.469479	0.17439	1
ENSMUSG00000051185	Fam174a	family with sequence similarity 174, member A	387.016	276.283	1.39935	0.484758	0.224619	1
ENSMUSG00000081051	Gm15427	predicted pseudogene 15427	3616.74	3495.73	1.03461	0.0490828	0.912459	1
ENSMUSG00000040710	St8sia4	ST8 alpha-N-acetyl-neuraminide alpha-2,8-sialyltransferase 4	429.339	411.579	1.04305	0.0608025	0.966043	1
ENSMUSG00000040693	Slco4c1	solute carrier organic anion transporter family, member 4C1	12.9037	6.43362	1.87038	0.903329	0.577944	1
ENSMUSG00000026335	Pam	peptidylglycine alpha-amidating monooxygenase	3676.27	2754.6	1.33447	0.416269	0.340663	1
ENSMUSG00000089791	Gm3555	predicted pseudogene 3555	577.802	237.614	2.42569	1.27839	0.136081	1
ENSMUSG00000050840	Cdh20	cadherin 20	4.54227	2.02459	1.83241	0.873739	0.787891	1
ENSMUSG00000026319	2310035C23Rik	RIKEN cDNA 2310035C23 gene	678.657	648.875	1.04583	0.0646438	0.839683	1
ENSMUSG00000026321	Tnfrsf11a	tumor necrosis factor receptor superfamily, member 11a, NFKB activator	258.713	194.188	1.33058	0.412056	0.348455	1
ENSMUSG00000038866	Zcchc2	zinc finger, CCHC domain containing 2	856.623	838.677	1.02137	0.0305094	0.973971	1
ENSMUSG00000057329	Bcl2	B cell leukemia/lymphoma 2	632.213	501.624	1.25981	0.33321	0.348811	1
ENSMUSG00000009905	Kdsr	3-ketodihydrosphingosine reductase	409.021	344.362	1.18722	0.247587	0.484422	1
ENSMUSG00000009907	Vps4b	vacuolar protein sorting 4B	971.691	915.114	1.06176	0.0864552	0.811578	1
ENSMUSG00000026315	Serpinb8	serine (or cysteine) peptidase inhibitor, clade B, member 8	260.128	216.221	1.20213	0.265592	0.537936	1
ENSMUSG00000047216	Cdh19	cadherin 19, type 2	12.1658	10.3365	1.16137	0.215824	0.965921	1
ENSMUSG00000026374	Tsn	translin	424.063	368.849	1.14929	0.200739	0.620424	1
ENSMUSG00000026377	Nifk	nucleolar protein interacting with the FHA domain of MKI67	267.322	260.997	1.02414	0.0344107	1	1
ENSMUSG00000064302	Clasp1	CLIP associating protein 1	1327.99	1178.13	1.1271	0.172614	0.660642	1
ENSMUSG00000048402	Gli2	GLI-Kruppel family member GLI2	16.7815	6.46726	2.38126	1.25172	0.323378	1
ENSMUSG00000004451	Ralb	v-ral simian leukemia viral oncogene B	830.147	788.343	1.05296	0.0744509	0.815094	1
ENSMUSG00000036975	Tmem177	transmembrane protein 177	106.529	74.2894	1.4282	0.514203	0.34674	1
ENSMUSG00000026387	Sctr	secretin receptor	16.3979	10.1902	1.55474	0.636675	0.633672	1
ENSMUSG00000050777	Tmem37	transmembrane protein 37	267.227	217.886	1.22542	0.293277	0.651348	1
ENSMUSG00000026389	Steap3	STEAP family member 3	117.401	88.4161	1.32416	0.405076	0.662296	1
ENSMUSG00000003721	Insig2	insulin induced gene 2	409.21	360.514	1.1347	0.182312	0.608442	1
ENSMUSG00000050534	Htr5b	5-hydroxytryptamine (serotonin) receptor 5B	3.84847	1.51844	1.92519	0.945	0.796736	1
ENSMUSG00000001674	Ddx18	DEAD (Asp-Glu-Ala-Asp) box polypeptide 18	147.141	132.022	1.11365	0.155302	0.729004	1
ENSMUSG00000036815	Dpp10	dipeptidylpeptidase 10	5.13129	0	6.13129	2.61619	0.35882	1
ENSMUSG00000026341	Actr3	ARP3 actin-related protein 3	1233.43	1085.19	1.13648	0.18457	0.600835	1
ENSMUSG00000026342	Slc35f5	solute carrier family 35, member F5	484.504	350.875	1.37976	0.464421	0.197824	1
ENSMUSG00000036155	Mgat5	mannoside acetylglucosaminyltransferase 5	788.715	753.163	1.04714	0.0664556	0.892939	1
ENSMUSG00000051590	Map3k19	mitogen-activated protein kinase kinase kinase 19	8.86237	4.76889	1.70958	0.773641	0.64618	1
ENSMUSG00000036086	Zranb3	zinc finger, RAN-binding domain containing 3	80.2036	41.6605	1.90348	0.928643	0.136117	1
ENSMUSG00000026353	Ubxn4	UBX domain protein 4	2312.92	2142.21	1.07965	0.110569	0.71416	1
ENSMUSG00000026354	Lct	lactase	8.89172	2.71066	2.66576	1.41454	0.46253	1
ENSMUSG00000026355	Mcm6	minichromosome maintenance complex component 6	395.694	349.751	1.13098	0.177577	0.705827	1
ENSMUSG00000089648	Gm15790	predicted pseudogene 15790	102.383	90.7216	1.12714	0.17266	0.724412	1
ENSMUSG00000046404	Yod1	YOD1 deubiquitinase	108.296	80.8239	1.33574	0.417642	0.418439	1
ENSMUSG00000016529	Il10	interleukin 10	13.9937	8.19927	1.62988	0.704762	0.547535	1
ENSMUSG00000016528	Mapkapk2	MAP kinase-activated protein kinase 2	1796.44	1750.83	1.02603	0.0370799	0.896647	1
ENSMUSG00000016526	Dyrk3	dual-specificity tyrosine-(Y)-phosphorylation regulated kinase 3	21.7954	18.941	1.14314	0.193004	0.999535	1
ENSMUSG00000042349	Ikbke	inhibitor of kappaB kinase epsilon	116.953	112.62	1.03813	0.0539856	0.920392	1
ENSMUSG00000026425	Srgap2	SLIT-ROBO Rho GTPase activating protein 2	1587.9	1283.4	1.23707	0.306931	0.353979	1
ENSMUSG00000055184	Fam72a	family with sequence similarity 72, member A	12.6375	4.11646	2.66541	1.41436	0.281574	1
ENSMUSG00000004552	Ctse	cathepsin E	13.8616	12.541	1.09752	0.134253	1	1
ENSMUSG00000052688	Rab7b	RAB7B, member RAS oncogene family	279.776	250.188	1.11779	0.160653	0.80585	1
ENSMUSG00000013275	Slc41a1	solute carrier family 41, member 1	703.611	534.443	1.31594	0.396093	0.234941	1
ENSMUSG00000026433	Rab29	RAB29, member RAS oncogene family	132.082	129.942	1.01635	0.0233913	0.971778	1
ENSMUSG00000026434	Nucks1	nuclear casein kinase and cyclin-dependent kinase substrate 1	1868.01	1736.57	1.07565	0.105203	0.708086	1
ENSMUSG00000026436	Elk4	ELK4, member of ETS oncogene family	1500.79	1254.54	1.19613	0.258373	0.453505	1
ENSMUSG00000042066	Tmcc2	transmembrane and coiled-coil domains 2	467.903	233.003	2.00384	1.00276	0.187311	1
ENSMUSG00000090079	Gm15849	predicted gene 15849	5.85444	0	6.85444	2.77704	0.221676	1
ENSMUSG00000042046	Dstyk	dual serine/threonine and tyrosine protein kinase	856.979	732.411	1.16985	0.226321	0.525367	1
ENSMUSG00000054387	Mdm4	transformed mouse 3T3 cell double minute 4	826.944	771.731	1.07145	0.0995671	0.768122	1
ENSMUSG00000026447	Pik3c2b	phosphoinositide-3-kinase, class 2, beta polypeptide	414.953	275.676	1.5034	0.588225	0.306544	1
ENSMUSG00000070645	Ren1	renin 1 structural	3388.24	709.066	4.77314	2.25494	0.183068	1
ENSMUSG00000070644	Etnk2	ethanolamine kinase 2	356.652	93.4659	3.78604	1.92069	0.207087	1
ENSMUSG00000070643	Sox13	SRY (sex determining region Y)-box 13	1572.68	897.973	1.75053	0.807791	0.120653	1
ENSMUSG00000051998	Lax1	lymphocyte transmembrane adaptor 1	26.7653	24.4296	1.09185	0.126772	0.974503	1
ENSMUSG00000026463	Atp2b4	ATPase, Ca++ transporting, plasma membrane 4	2573.24	1446.86	1.77797	0.830228	0.188756	1
ENSMUSG00000010311	Optc	opticin	106.181	17.9623	5.6523	2.49884	0.344383	1
ENSMUSG00000020423	Btg2	B cell translocation gene 2, anti-proliferative	8582.99	7076.22	1.21291	0.278467	0.60026	1
ENSMUSG00000026456	Cyb5r1	cytochrome b5 reductase 1	386.251	304.536	1.26745	0.341925	0.395666	1
ENSMUSG00000026457	Adipor1	adiponectin receptor 1	1790.52	1719.93	1.04102	0.0579929	0.85929	1
ENSMUSG00000042229	Rabif	RAB interacting factor	186.292	165.81	1.12279	0.167087	0.712598	1
ENSMUSG00000042207	Kdm5b	lysine (K)-specific demethylase 5B	835.951	819.701	1.0198	0.0282871	0.925863	1
ENSMUSG00000026452	Syt2	synaptotagmin II	54.2642	9.4705	5.27809	2.40002	0.115856	1
ENSMUSG00000073557	Ppp1r12b	protein phosphatase 1, regulatory (inhibitor) subunit 12B	2778.93	937.51	2.96207	1.56661	0.324987	1
ENSMUSG00000026429	Ube2t	ubiquitin-conjugating enzyme E2T	5.0139	1.37215	2.53521	1.3421	0.534673	1
ENSMUSG00000031506	Ptpn7	protein tyrosine phosphatase, non-receptor type 7	68.4108	46.88	1.44968	0.535738	0.713406	1
ENSMUSG00000026426	Arl8a	ADP-ribosylation factor-like 8A	648.913	621.454	1.04411	0.0622792	0.85002	1
ENSMUSG00000087721	Gm26280	predicted gene, 26280	9.57085	8.70542	1.08917	0.123229	0.910971	1
ENSMUSG00000085311	Gm15445	predicted gene 15445	10.1452	8.05298	1.23111	0.299956	0.757379	1
ENSMUSG00000026424	Gpr37l1	G protein-coupled receptor 37-like 1	5.81042	4.11646	1.33108	0.412599	0.774618	1
ENSMUSG00000079139	Gm4204	predicted gene 4204	1319.16	1135.02	1.16209	0.216727	0.45704	1
ENSMUSG00000041926	Rnpep	arginyl aminopeptidase (aminopeptidase B)	443.116	368.24	1.20278	0.266377	0.437128	1
ENSMUSG00000048096	Lmod1	leiomodin 1 (smooth muscle)	1928.75	338.346	5.68667	2.50759	0.309294	1
ENSMUSG00000041889	Shisa4	shisa family member 4	173.015	111.147	1.55167	0.633819	0.20297	1
ENSMUSG00000041879	Ipo9	importin 9	1183.94	1139.04	1.03938	0.0557264	0.86476	1
ENSMUSG00000054412	Gm4793	predicted gene 4793	29.4483	14.3067	1.98922	0.992201	0.281782	1
ENSMUSG00000090399	Gm38399	predicted gene, 38399	401.747	271.445	1.47827	0.56391	0.119637	1
ENSMUSG00000026421	Csrp1	cysteine and glycine-rich protein 1	3411.64	845.166	4.03307	2.01188	0.207808	1
ENSMUSG00000041801	Phlda3	pleckstrin homology like domain, family A, member 3	103.946	55.6863	1.85135	0.888578	0.132102	1
ENSMUSG00000026414	Tnnt2	troponin T2, cardiac	6.75368	2.02459	2.56355	1.35814	0.566251	1
ENSMUSG00000026407	Cacna1s	calcium channel, voltage-dependent, L type, alpha 1S subunit	10.4554	3.7566	2.40832	1.26803	0.402984	1
ENSMUSG00000087230	Mroh3	maestro heat-like repeat family member 3	6.35542	0	7.35542	2.87881	0.191703	1
ENSMUSG00000041570	Camsap2	calmodulin regulated spectrin-associated protein family, member 2	2382.42	2233.5	1.06665	0.0930814	0.752997	1
ENSMUSG00000026404	Ddx59	DEAD (Asp-Glu-Ala-Asp) box polypeptide 59	117.764	105.074	1.11964	0.16303	0.772569	1
ENSMUSG00000041498	Kif14	kinesin family member 14	15.1297	11.4161	1.2991	0.377514	0.74542	1
ENSMUSG00000041483	Zfp281	zinc finger protein 281	694.954	567.782	1.22359	0.291117	0.428875	1
ENSMUSG00000026398	Nr5a2	nuclear receptor subfamily 5, group A, member 2	59.0266	35.126	1.66159	0.732566	0.597883	1
ENSMUSG00000026393	Nek7	NIMA (never in mitosis gene a)-related expressed kinase 7	1217.91	1158.45	1.05128	0.0721476	0.802315	1
ENSMUSG00000085361	Gm16305	predicted gene 16305	10.9711	8.85171	1.21513	0.281106	0.862779	1
ENSMUSG00000070594	Gm4788	predicted gene 4788	4.67434	1.01229	2.81984	1.49561	0.595325	1
ENSMUSG00000033898	Cfhr2	complement factor H-related 2	14.7168	8.85171	1.59534	0.673863	0.5984	1
ENSMUSG00000089991	Gm16332	predicted gene 16332	29.9493	8.78442	3.16312	1.66135	0.13946	1
ENSMUSG00000089640	Gm6397	predicted gene 6397	14.6875	12.8672	1.13126	0.177932	0.999763	1
ENSMUSG00000018199	Trove2	TROVE domain family, member 2	924.363	686.972	1.34506	0.42767	0.222439	1
ENSMUSG00000026358	Rgs1	regulator of G-protein signaling 1	770.348	757.493	1.01695	0.0242467	0.986605	1
ENSMUSG00000090323	Gm5263	predicted gene 5263	5.86912	5.24139	1.10057	0.138256	1	1
ENSMUSG00000082588	Gm15443	predicted gene 15443	19.3178	19.0419	1.01376	0.0197221	1	1
ENSMUSG00000006010	BC003331	cDNA sequence BC003331	618.494	558.165	1.10789	0.147816	0.676936	1
ENSMUSG00000006005	Tpr	translocated promoter region, nuclear basket protein	5158.14	5053.56	1.02069	0.0295466	0.912718	1
ENSMUSG00000026484	Rnf2	ring finger protein 2	451.941	368.713	1.22512	0.292918	0.405585	1
ENSMUSG00000026483	Fam129a	family with sequence similarity 129, member A	1393.11	1313.85	1.06028	0.0844447	0.904788	1
ENSMUSG00000032666	1700025G04Rik	RIKEN cDNA 1700025G04 gene	585.122	312.68	1.86854	0.901908	0.135432	1
ENSMUSG00000032649	Colgalt2	collagen beta(1-O)galactosyltransferase 2	411.572	367.478	1.11966	0.163066	0.792547	1
ENSMUSG00000080878	Gm15618	predicted gene 15618	4.21738	1.01229	2.59275	1.37449	0.646968	1
ENSMUSG00000008475	Arpc5	actin related protein 2/3 complex, subunit 5	843.277	799.961	1.05408	0.0759841	0.787348	1
ENSMUSG00000042751	Nmnat2	nicotinamide nucleotide adenylyltransferase 2	46.4919	16.7248	2.67941	1.42191	0.478754	1
ENSMUSG00000026479	Lamc2	laminin, gamma 2	770.96	612.984	1.2573	0.330325	0.744898	1
ENSMUSG00000026478	Lamc1	laminin, gamma 1	2653.53	1945.69	1.36362	0.447437	0.268151	1
ENSMUSG00000026475	Rgs16	regulator of G-protein signaling 16	363.431	123.329	2.93119	1.55149	0.398805	1
ENSMUSG00000043282	Teddm1b	transmembrane epididymal protein 1B	5.0726	0.506147	4.03188	2.01145	0.434421	1
ENSMUSG00000004110	Cacna1e	calcium channel, voltage-dependent, R type, alpha 1E subunit	43.8884	39.9285	1.09675	0.133236	0.944962	1
ENSMUSG00000056708	Ier5	immediate early response 5	2613.64	1682.09	1.55348	0.6355	0.14422	1
ENSMUSG00000026471	Mr1	major histocompatibility complex, class I-related	210.115	102.656	2.03669	1.02623	0.171917	1
ENSMUSG00000026470	Stx6	syntaxin 6	453.257	438.312	1.03402	0.0482628	0.904999	1
ENSMUSG00000033701	Acbd6	acyl-Coenzyme A binding domain containing 6	274.622	246.24	1.1148	0.15678	0.706798	1
ENSMUSG00000033684	Qsox1	quiescin Q6 sulfhydryl oxidase 1	462.233	345.645	1.33633	0.418278	0.264781	1
ENSMUSG00000033671	Cep350	centrosomal protein 350	4052.89	3962.31	1.02285	0.0325986	0.925995	1
ENSMUSG00000026466	Tor1aip1	torsin A interacting protein 1	1313.29	1067.18	1.2304	0.299132	0.353095	1
ENSMUSG00000050565	Tor1aip2	torsin A interacting protein 2	1203.05	916.36	1.31251	0.39233	0.201237	1
ENSMUSG00000078193	Gm2000	predicted gene 2000	1629.49	1564.09	1.04179	0.0590619	0.875036	1
ENSMUSG00000026596	Abl2	v-abl Abelson murine leukemia viral oncogene 2 (arg, Abelson-related gene)	1249.33	927.349	1.34683	0.42957	0.295593	1
ENSMUSG00000033544	Angptl1	angiopoietin-like 1	20.7788	18.7493	1.10276	0.141116	0.864996	1
ENSMUSG00000026592	Tex35	testis expressed 35	6.41412	2.38445	2.19064	1.13136	0.626546	1
ENSMUSG00000070565	Rasal2	RAS protein activator like 2	1569.9	1053.33	1.48995	0.575261	0.121837	1
ENSMUSG00000087632	Gm6058	predicted gene 6058	23.6232	10.8763	2.07331	1.05193	0.336675	1
ENSMUSG00000049881	2810025M15Rik	RIKEN cDNA 2810025M15 gene	138.396	95.6485	1.4423	0.528369	0.308201	1
ENSMUSG00000004031	Brinp2	bone morphogenic protein/retinoic acid inducible neural-specific 2	13.1678	12.1812	1.07485	0.104138	0.995211	1
ENSMUSG00000026587	Astn1	astrotactin 1	77.856	69.4986	1.11855	0.161627	0.982274	1
ENSMUSG00000073530	Pappa2	pappalysin 2	155.397	107.268	1.44454	0.530611	0.456286	1
ENSMUSG00000047661	1600012P17Rik	RIKEN cDNA 1600012P17 gene	6.29672	6.25369	1.00593	0.00853424	0.967825	1
ENSMUSG00000040782	Rfwd2	ring finger and WD repeat domain 2	348.219	280.702	1.23968	0.309963	0.40651	1
ENSMUSG00000090394	4930523C07Rik	RIKEN cDNA 4930523C07 gene	383.761	263.742	1.45334	0.539377	0.492946	1
ENSMUSG00000040423	Rc3h1	RING CCCH (C3H) domains 1	1942.28	1652.89	1.17497	0.232627	0.488915	1
ENSMUSG00000026715	Serpinc1	serine (or cysteine) peptidase inhibitor, clade C (antithrombin), member 1	17.8862	7.5922	2.19806	1.13623	0.646349	1
ENSMUSG00000043467	Zbtb37	zinc finger and BTB domain containing 37	365.263	327.21	1.11594	0.158258	0.689977	1
ENSMUSG00000026708	Cenpl	centromere protein L	68.0692	39.2761	1.71489	0.77812	0.234769	1
ENSMUSG00000026705	Klhl20	kelch-like 20	289.519	275.382	1.05115	0.0719729	0.81531	1
ENSMUSG00000040297	Suco	SUN domain containing ossification factor	1028.09	909.356	1.13042	0.17686	0.630201	1
ENSMUSG00000086277	4930558K02Rik	RIKEN cDNA 4930558K02 gene	4.21738	1.69837	1.93353	0.951238	0.738453	1
ENSMUSG00000040265	Dnm3	dynamin 3	1178.51	740.812	1.59004	0.66906	0.0787461	1
ENSMUSG00000090260	2810442N19Rik	RIKEN cDNA 2810442N19 gene	33.8271	27.2412	1.2332	0.302409	0.708131	1
ENSMUSG00000078190	Dnm3os	dynamin 3, opposite strand	174.522	107.053	1.62441	0.699919	0.118772	1
ENSMUSG00000089933	Gm16101	predicted gene 16101	4.15869	2.02459	1.70558	0.770266	0.836552	1
ENSMUSG00000026694	Mettl13	methyltransferase like 13	164.587	161.861	1.01673	0.0239425	0.927119	1
ENSMUSG00000026696	Vamp4	vesicle-associated membrane protein 4	370.046	331.856	1.11473	0.156697	0.737069	1
ENSMUSG00000040225	Prrc2c	proline-rich coiled-coil 2C	9889.18	9551.54	1.03535	0.0501129	0.868355	1
ENSMUSG00000026691	Fmo3	flavin containing monooxygenase 3	7.52085	7.11969	1.04941	0.0695723	1	1
ENSMUSG00000040124	Gorab	golgin, RAB6-interacting	135.105	98.8536	1.36305	0.446835	0.352667	1
ENSMUSG00000041396	Mettl18	methyltransferase like 18	38.1493	36.1265	1.05448	0.0765341	0.879297	1
ENSMUSG00000026574	Dpt	dermatopontin	72.9824	48.7466	1.48719	0.572586	0.504644	1
ENSMUSG00000040848	Sft2d2	SFT2 domain containing 2	1581.49	1501.38	1.05332	0.0749472	0.84502	1
ENSMUSG00000040836	Gpr161	G protein-coupled receptor 161	69.895	42.5938	1.62626	0.70156	0.418805	1
ENSMUSG00000026566	Mpzl1	myelin protein zero-like 1	544.633	418.214	1.30156	0.380244	0.328446	1
ENSMUSG00000026565	Pou2f1	POU domain, class 2, transcription factor 1	708.071	675.611	1.04797	0.0676032	0.886486	1
ENSMUSG00000026564	Dusp27	dual specificity phosphatase 27 (putative)	60.5149	14.453	3.98078	1.99305	0.367829	1
ENSMUSG00000089853	Gm15853	predicted gene 15853	9.77628	9.32421	1.04379	0.0618283	1	1
ENSMUSG00000040596	Pogk	pogo transposable element with KRAB domain	1021.72	704.077	1.45051	0.536561	0.27502	1
ENSMUSG00000060568	Fam78b	family with sequence similarity 78, member B	38.2373	29.7719	1.2751	0.350611	0.660399	1
ENSMUSG00000026558	Uck2	uridine-cytidine kinase 2	123.159	106.671	1.15314	0.205562	0.752418	1
ENSMUSG00000040485	Lrrc52	leucine rich repeat containing 52	25.1282	21.3927	1.16682	0.222578	0.873368	1
ENSMUSG00000026686	Lmx1a	LIM homeobox transcription factor 1 alpha	5.48553	0	6.48553	2.69722	0.249272	1
ENSMUSG00000052534	Pbx1	pre B cell leukemia homeobox 1	4169.94	2899.95	1.43779	0.523848	0.11125	1
ENSMUSG00000026683	Nuf2	NUF2, NDC80 kinetochore complex component	10.9124	10.1902	1.06453	0.0902221	1	1
ENSMUSG00000026678	Rgs5	regulator of G-protein signaling 5	23871.7	1731.27	13.7812	3.78463	0.184623	1
ENSMUSG00000038530	Rgs4	regulator of G-protein signaling 4	449.087	146.926	3.04265	1.60533	0.399772	1
ENSMUSG00000026674	Ddr2	discoidin domain receptor family, member 2	564.61	121.518	4.61656	2.20682	0.170185	1
ENSMUSG00000026670	Uap1	UDP-N-acetylglucosamine pyrophosphorylase 1	1143.73	835.921	1.36778	0.451839	0.43484	1
ENSMUSG00000026667	Uhmk1	U2AF homology motif (UHM) kinase 1	2158.49	2119.49	1.01839	0.0262939	0.959285	1
ENSMUSG00000038463	Olfml2b	olfactomedin-like 2B	239.515	114.05	2.09053	1.06387	0.368482	1
ENSMUSG00000026663	Atf6	activating transcription factor 6	1422.71	1282.08	1.1096	0.150041	0.60853	1
ENSMUSG00000070524	Fcrlb	Fc receptor-like B	7.04922	4.08281	1.58361	0.663222	0.735556	1
ENSMUSG00000026656	Fcgr2b	Fc receptor, IgG, low affinity IIb	654.599	532.353	1.2292	0.297723	0.677973	1
ENSMUSG00000059498	Fcgr3	Fc receptor, IgG, low affinity III	636.401	287.092	2.21249	1.14567	0.178313	1
ENSMUSG00000026649	Cfap126	cilia and flagella associated protein 126	46.9236	42.6274	1.09847	0.1355	0.77602	1
ENSMUSG00000056569	Mpz	myelin protein zero	13.1971	10.5837	1.22561	0.293503	0.812307	1
ENSMUSG00000038370	Pcp4l1	Purkinje cell protein 4-like 1	1871.45	245.724	7.58927	2.92396	0.245824	1
ENSMUSG00000005677	Nr1i3	nuclear receptor subfamily 1, group I, member 3	13.522	10.4828	1.26468	0.33877	0.921901	1
ENSMUSG00000005681	Apoa2	apolipoprotein A-II	27.6792	25.7564	1.07186	0.10012	0.854075	1
ENSMUSG00000058715	Fcer1g	Fc receptor, IgE, high affinity I, gamma polypeptide	487.191	286.281	1.69935	0.764982	0.280302	1
ENSMUSG00000006403	Adamts4	a disintegrin-like and metallopeptidase (reprolysin type) with thrombospondin type 1 motif, 4	484.471	31.7512	14.823	3.88977	0.188217	1
ENSMUSG00000052423	B4galt3	UDP-Gal:betaGlcNAc beta 1,4-galactosyltransferase, polypeptide 3	252.781	220.494	1.14577	0.196316	0.578085	1
ENSMUSG00000053483	Usp21	ubiquitin specific peptidase 21	289.192	271.479	1.06501	0.0908665	0.77908	1
ENSMUSG00000062963	Ufc1	ubiquitin-fold modifier conjugating enzyme 1	326.44	313.623	1.04074	0.0576062	0.892838	1
ENSMUSG00000006412	Pfdn2	prefoldin 2	369.75	326.075	1.13353	0.180825	0.689661	1
ENSMUSG00000045259	Klhdc9	kelch domain containing 9	38.2813	27.8146	1.36324	0.447042	0.501932	1
ENSMUSG00000006411	Nectin4	nectin cell adhesion molecule 4	58.5444	47.588	1.2255	0.293367	0.680707	1
ENSMUSG00000026641	Usf1	upstream transcription factor 1	244.759	200.598	1.21906	0.285765	0.473285	1
ENSMUSG00000038235	F11r	F11 receptor	1039.62	974.184	1.0671	0.0936921	0.757106	1
ENSMUSG00000091993	B930036N10Rik	RIKEN cDNA B930036N10 gene	8.44944	1.01229	4.69586	2.23139	0.275726	1
ENSMUSG00000060244	Alyref2	Aly/REF export factor 2	26.824	18.6148	1.41852	0.504387	0.707287	1
ENSMUSG00000004707	Ly9	lymphocyte antigen 9	114.098	68.5536	1.65481	0.726662	0.521617	1
ENSMUSG00000015355	Cd48	CD48 antigen	117.843	81.2291	1.44527	0.53134	0.585981	1
ENSMUSG00000015316	Slamf1	signaling lymphocytic activation molecule family member 1	17.4585	14.352	1.20235	0.26586	0.999851	1
ENSMUSG00000038147	Cd84	CD84 antigen	386.328	125.713	3.05674	1.61199	0.20765	1
ENSMUSG00000073492	Gm10521	predicted gene 10521	21.1477	1.01229	11.0062	3.46024	0.161	1
ENSMUSG00000015314	Slamf6	SLAM family member 6	25.5852	15.9041	1.5727	0.653247	0.607812	1
ENSMUSG00000026556	Vangl2	vang-like 2 (van gogh, Drosophila)	165.803	136.117	1.2165	0.282738	0.7106	1
ENSMUSG00000003458	Ncstn	nicastrin	945.068	834.718	1.13204	0.178927	0.631404	1
ENSMUSG00000026553	Copa	coatomer protein complex subunit alpha	4067.82	3138.06	1.29619	0.374278	0.233213	1
ENSMUSG00000089803	Gm10171	predicted gene 10171	3.33282	3.03688	1.07331	0.102065	1	1
ENSMUSG00000013698	Pea15a	phosphoprotein enriched in astrocytes 15A	2306.3	1882.18	1.22522	0.293036	0.335281	1
ENSMUSG00000007122	Casq1	calsequestrin 1	23.3423	14.6329	1.55712	0.638883	0.563452	1
ENSMUSG00000007107	Atp1a4	ATPase, Na+/K+ transporting, alpha 4 polypeptide	5.10195	4.6226	1.08525	0.118031	0.941129	1
ENSMUSG00000007097	Atp1a2	ATPase, Na+/K+ transporting, alpha 2 polypeptide	769.124	155.204	4.93024	2.30166	0.257942	1
ENSMUSG00000038026	Kcnj9	potassium inwardly-rectifying channel, subfamily J, member 9	36.2187	13.6542	2.53979	1.34471	0.240379	1
ENSMUSG00000026548	Slamf9	SLAM family member 9	187.908	184.47	1.01854	0.0264995	1	1
ENSMUSG00000026547	Tagln2	transgelin 2	1793.56	908.041	1.97413	0.981214	0.0663034	1
ENSMUSG00000026546	Cfap45	cilia and flagella associated protein 45	38.6922	14.7792	2.51548	1.33083	0.410785	1
ENSMUSG00000085184	4933439K11Rik	RIKEN cDNA 4933439K11 gene	18.5213	8.49185	2.05663	1.04029	0.404882	1
ENSMUSG00000049598	Vsig8	V-set and immunoglobulin domain containing 8	7.59422	0.686076	5.09717	2.3497	0.230565	1
ENSMUSG00000053318	Slamf8	SLAM family member 8	74.6615	47.1608	1.57102	0.651698	0.346221	1
ENSMUSG00000026544	Dusp23	dual specificity phosphatase 23	67.4948	33.4949	1.98565	0.989613	0.138127	1
ENSMUSG00000005338	Cadm3	cell adhesion molecule 3	22.5919	10.1566	2.11462	1.0804	0.378101	1
ENSMUSG00000043263	Ifi209	interferon activated gene 209	232.757	163.471	1.42127	0.507178	0.252021	1
ENSMUSG00000066677	Ifi208	interferon activated gene 208	395.007	84.5469	4.62912	2.21074	0.139434	1
ENSMUSG00000090222	Ifi203-ps	interferon activated gene 203, pseudogene	310.588	130.684	2.36618	1.24256	0.313506	1
ENSMUSG00000090272	Mndal	myeloid nuclear differentiation antigen like	1249.22	464.126	2.68792	1.42649	0.166327	1
ENSMUSG00000026536	Ifi211	interferon activated gene 211	258.493	73.1308	3.50047	1.80755	0.134269	1
ENSMUSG00000039997	Ifi203	interferon activated gene 203	2362.42	1075.55	2.19537	1.13446	0.338899	1
ENSMUSG00000054203	Ifi205	interferon activated gene 205	34.7704	33.8547	1.02627	0.0374097	0.993656	1
ENSMUSG00000028354	Fmn2	formin 2	33.6343	4.76889	6.00363	2.58583	0.237842	1
ENSMUSG00000050069	Grem2	gremlin 2, DAN family BMP antagonist	153.693	73.9295	2.06452	1.04581	0.422906	1
ENSMUSG00000026527	Rgs7	regulator of G protein signaling 7	8.37607	4.91518	1.58509	0.664561	0.754051	1
ENSMUSG00000026525	Opn3	opsin 3	54.4738	46.8683	1.15888	0.212737	0.813713	1
ENSMUSG00000078185	Chml	choroideremia-like	213.112	129.402	1.64193	0.715396	0.124649	1
ENSMUSG00000057335	Cep170	centrosomal protein 170	1401.51	957.865	1.46268	0.548615	0.090101	1
ENSMUSG00000026504	Sdccag8	serologically defined colon cancer antigen 8	490.409	466.655	1.05079	0.0714789	0.804089	1
ENSMUSG00000019699	Akt3	thymoma viral proto-oncogene 3	1202.37	608.183	1.97538	0.982127	0.363821	1
ENSMUSG00000089657	Gm16585	predicted gene 16585	9.77628	7.29962	1.29841	0.376742	0.867367	1
ENSMUSG00000026500	Cox20	COX20 Cox2 chaperone	8.0952	2.38445	2.68735	1.42619	0.44598	1
ENSMUSG00000039630	Hnrnpu	heterogeneous nuclear ribonucleoprotein U	6962.1	6851.59	1.01613	0.0230803	0.938429	1
ENSMUSG00000089713	Gm16564	predicted gene 16564	5.95716	2.38445	2.05563	1.03958	0.631838	1
ENSMUSG00000055067	Smyd3	SET and MYND domain containing 3	271.279	265.439	1.02192	0.0312826	0.875383	1
ENSMUSG00000038949	Cnst	consortin, connexin sorting protein	676.005	530.214	1.27445	0.349873	0.32145	1
ENSMUSG00000038936	Sccpdh	saccharopine dehydrogenase (putative)	185.51	171.322	1.08234	0.11415	0.893263	1
ENSMUSG00000026491	Ahctf1	AT hook containing transcription factor 1	1676.25	1413.91	1.18541	0.245382	0.447591	1
ENSMUSG00000026490	Cdc42bpa	CDC42 binding protein kinase alpha	3342.17	2675.87	1.24891	0.320666	0.291785	1
ENSMUSG00000010609	Psen2	presenilin 2	232.214	220.573	1.05254	0.0738709	0.823779	1
ENSMUSG00000055676	Gm5069	predicted pseudogene 5069	22.6799	20.1669	1.11873	0.161859	0.979438	1
ENSMUSG00000038855	Itpkb	inositol 1,4,5-trisphosphate 3-kinase B	2873.42	2326.9	1.23477	0.304238	0.333716	1
ENSMUSG00000053963	Stum	mechanosensory transduction mediator	145.143	57.4739	2.49929	1.32152	0.138619	1
ENSMUSG00000026496	Parp1	poly (ADP-ribose) polymerase family, member 1	1028.39	1025.81	1.00251	0.00361515	0.998068	1
ENSMUSG00000058729	Lin9	lin-9 homolog (C. elegans)	90.7659	73.8169	1.22654	0.294594	0.592632	1
ENSMUSG00000026499	Acbd3	acyl-Coenzyme A binding domain containing 3	1174.83	1017.64	1.15431	0.20703	0.496482	1
ENSMUSG00000073485	H3f3aos	H3 histone, family 3A, opposite strand	21.4558	8.96435	2.25362	1.17224	0.361712	1
ENSMUSG00000038806	Sde2	SDE2 telomere maintenance homolog (S. pombe)	472.584	391.95	1.2052	0.269273	0.451454	1
ENSMUSG00000026520	Pycr2	pyrroline-5-carboxylate reductase family, member 2	132.099	119.414	1.10535	0.144499	0.763749	1
ENSMUSG00000038793	Lefty1	left right determination factor 1	9.23128	2.02459	3.3827	1.75818	0.373261	1
ENSMUSG00000026519	Tmem63a	transmembrane protein 63a	385.727	247.456	1.55652	0.638326	0.252481	1
ENSMUSG00000085563	2210411M09Rik	RIKEN cDNA 2210411M09 gene	10.8243	2.53073	3.34897	1.74372	0.338703	1
ENSMUSG00000026516	Nvl	nuclear VCP-like	427.305	328.808	1.29865	0.377014	0.319073	1
ENSMUSG00000038733	Wdr26	WD repeat domain 26	2573.56	2485.95	1.03523	0.049949	0.891545	1
ENSMUSG00000081214	Rpl35a-ps2	ribosomal protein L35A, pseudogene 2	218.233	182.22	1.19655	0.258886	0.567938	1
ENSMUSG00000050625	Ccdc121	coiled-coil domain containing 121	5.78107	1.01229	3.36982	1.75267	0.540473	1
ENSMUSG00000004880	Lbr	lamin B receptor	704.043	586.477	1.20012	0.263178	0.521183	1
ENSMUSG00000022995	Enah	enabled homolog (Drosophila)	1519.99	1256.35	1.20968	0.274625	0.564396	1
ENSMUSG00000047539	Fbxo28	F-box protein 28	403.005	376.89	1.06911	0.0964063	0.801375	1
ENSMUSG00000026509	Capn2	calpain 2	2489.16	1881.69	1.32266	0.403439	0.192563	1
ENSMUSG00000039384	Dusp10	dual specificity phosphatase 10	147.917	137.793	1.07294	0.101567	0.979835	1
ENSMUSG00000044854	1700056E22Rik	RIKEN cDNA 1700056E22 gene	12.9624	5.60125	2.11511	1.08073	0.473597	1
ENSMUSG00000039377	Hlx	H2.0-like homeobox	421.644	345.297	1.22047	0.287432	0.477312	1
ENSMUSG00000026620	Mark1	MAP/microtubule affinity regulating kinase 1	536.627	105.028	5.0706	2.34216	0.322278	1
ENSMUSG00000039318	Rab3gap2	RAB3 GTPase activating protein subunit 2	768.05	662.968	1.15826	0.211963	0.516891	1
ENSMUSG00000039239	Tgfb2	transforming growth factor, beta 2	566.177	240.842	2.34524	1.22973	0.275463	1
ENSMUSG00000039210	Gpatch2	G patch domain containing 2	679.296	594.899	1.14163	0.191095	0.562712	1
ENSMUSG00000026604	Ptpn14	protein tyrosine phosphatase, non-receptor type 14	1646.56	1404.11	1.17255	0.229649	0.600496	1
ENSMUSG00000079045	Prox1os	prospero homeobox 1, opposite strand	4.54227	2.02459	1.83241	0.873739	0.787891	1
ENSMUSG00000089872	Rps6kc1	ribosomal protein S6 kinase polypeptide 1	410.272	366.621	1.11874	0.161875	0.649987	1
ENSMUSG00000037568	Vash2	vasohibin 2	25.3043	9.68407	2.46201	1.29984	0.230954	1
ENSMUSG00000062510	Nsl1	NSL1, MIS12 kinetochore complex component	12.1952	7.5922	1.53572	0.618913	0.787382	1
ENSMUSG00000026630	Batf3	basic leucine zipper transcription factor, ATF-like 3	40.1259	30.8515	1.29118	0.368685	0.578606	1
ENSMUSG00000026628	Atf3	activating transcription factor 3	9611	6987.97	1.37531	0.459757	0.549558	1
ENSMUSG00000037499	Nenf	neuron derived neurotrophic factor	317.517	222.216	1.42695	0.512933	0.199042	1
ENSMUSG00000037474	Dtl	denticleless E3 ubiquitin protein ligase	14.4527	7.00705	1.92988	0.948515	0.637472	1
ENSMUSG00000037461	Ints7	integrator complex subunit 7	377.256	300.442	1.25482	0.327486	0.395673	1
ENSMUSG00000049353	Rd3	retinal degeneration 3	11.8703	4.94882	2.1635	1.11337	0.433039	1
ENSMUSG00000026637	Traf5	TNF receptor-associated factor 5	190.625	173.481	1.09826	0.135215	0.820934	1
ENSMUSG00000037395	Rcor3	REST corepressor 3	355.786	352.449	1.00944	0.0135572	0.945307	1
ENSMUSG00000058248	Kcnh1	potassium voltage-gated channel, subfamily H (eag-related), member 1	28.5931	12.2484	2.2337	1.15944	0.23735	1
ENSMUSG00000016262	Sertad4	SERTA domain containing 4	92.8977	53.5827	1.72028	0.782646	0.468425	1
ENSMUSG00000089812	Gm15867	predicted gene 15867	5.13129	0	6.13129	2.61619	0.35882	1
ENSMUSG00000016194	Hsd11b1	hydroxysteroid 11-beta dehydrogenase 1	96.0166	67.395	1.41848	0.504341	0.530012	1
ENSMUSG00000016493	Cd46	CD46 antigen, complement regulatory protein	34.2568	26.3298	1.29005	0.367424	0.601992	1
ENSMUSG00000016481	Cr1l	complement component (3b/4b) receptor 1-like	310.307	234.431	1.32229	0.403035	0.320486	1
ENSMUSG00000015202	Cnksr3	Cnksr family member 3	490.916	480.445	1.02175	0.0310404	0.953843	1
ENSMUSG00000000766	Oprm1	opioid receptor, mu 1	34.0052	25.6891	1.31159	0.39132	0.642044	1
ENSMUSG00000019775	Rgs17	regulator of G-protein signaling 17	21.7493	1.01229	11.3052	3.49891	0.220286	1
ENSMUSG00000046916	Myct1	myc target 1	396.122	214.882	1.83953	0.879335	0.136511	1
ENSMUSG00000019768	Esr1	estrogen receptor 1 (alpha)	516.908	153.269	3.35718	1.74725	0.217295	1
ENSMUSG00000075327	Zbtb2	zinc finger and BTB domain containing 2	279.087	234.61	1.18877	0.249472	0.558561	1
ENSMUSG00000038587	Akap12	A kinase (PRKA) anchor protein (gravin) 12	4928.29	2641.61	1.86531	0.899417	0.260403	1
ENSMUSG00000040675	Mthfd1l	methylenetetrahydrofolate dehydrogenase (NADP+ dependent) 1-like	72.3893	36.1602	1.97494	0.981812	0.0997905	1
ENSMUSG00000082605	Gm16148	predicted gene 16148	16.4419	7.15334	2.13924	1.0971	0.378115	1
ENSMUSG00000087350	Gm16254	predicted gene 16254	5.92781	0	6.92781	2.7924	0.218286	1
ENSMUSG00000040034	Nup43	nucleoporin 43	53.1449	51.9634	1.02231	0.03183	0.986625	1
ENSMUSG00000040021	Lats1	large tumor suppressor	1280.64	1276.25	1.00343	0.0049466	0.954683	1
ENSMUSG00000019794	Katna1	katanin p60 (ATPase-containing) subunit A1	314.755	220.63	1.42469	0.510651	0.269208	1
ENSMUSG00000040006	Ginm1	glycoprotein integral membrane 1	575.754	574.011	1.00303	0.00436803	0.923537	1
ENSMUSG00000015757	Ppil4	peptidylprolyl isomerase (cyclophilin)-like 4	721.774	625.649	1.15339	0.205886	0.538841	1
ENSMUSG00000047712	Ust	uronyl-2-sulfotransferase	81.6646	60.6469	1.34094	0.423242	0.655349	1
ENSMUSG00000015305	Sash1	SAM and SH3 domain containing 1	1907.16	1412.71	1.34975	0.432693	0.164781	1
ENSMUSG00000060487	Samd5	sterile alpha motif domain containing 5	43.8696	17.3099	2.45056	1.29311	0.134065	1
ENSMUSG00000019790	Stxbp5	syntaxin binding protein 5 (tomosyn)	757.112	659.743	1.14736	0.198323	0.630718	1
ENSMUSG00000019832	Rab32	RAB32, member RAS oncogene family	110.054	97.5721	1.12663	0.172014	0.857483	1
ENSMUSG00000090112	Shprh	SNF2 histone linker PHD RING helicase	916.159	907.454	1.00958	0.0137578	0.990111	1
ENSMUSG00000047648	Fbxo30	F-box protein 30	646.362	533.24	1.21174	0.277086	0.531914	1
ENSMUSG00000019820	Utrn	utrophin	15380.7	9059.91	1.69758	0.763483	0.345152	1
ENSMUSG00000039232	Stx11	syntaxin 11	136.56	62.4798	2.16699	1.11569	0.362226	1
ENSMUSG00000078348	Sf3b5	splicing factor 3b, subunit 5	178.373	173.278	1.02924	0.0415759	0.892912	1
ENSMUSG00000062866	Phactr2	phosphatase and actin regulator 2	2004.21	1610.91	1.244	0.314982	0.415438	1
ENSMUSG00000019808	Adat2	adenosine deaminase, tRNA-specific 2	50.6253	46.0242	1.09785	0.134676	0.777017	1
ENSMUSG00000019806	Aig1	androgen-induced 1	553.525	451.832	1.22457	0.292277	0.420731	1
ENSMUSG00000015501	Hivep2	human immunodeficiency virus type I enhancer binding protein 2	1901.93	1355.01	1.40333	0.48885	0.140714	1
ENSMUSG00000039116	Adgrg6	adhesion G protein-coupled receptor G6	152.888	98.7073	1.5434	0.626114	0.178834	1
ENSMUSG00000071532	Gm10335	predicted gene 10335	17.0917	13.2944	1.26565	0.33988	0.739222	1
ENSMUSG00000085572	Gm16234	predicted gene 16234	2.96391	2.38445	1.17121	0.228003	0.990807	1
ENSMUSG00000039891	Txlnb	taxilin beta	99.0037	28.0853	3.43829	1.78169	0.124534	1
ENSMUSG00000093537	Gm7584	predicted gene 7584	25.6145	21.1001	1.20427	0.268157	0.780798	1
ENSMUSG00000039879	Heca	hdc homolog, cell cycle regulator	742.77	657.93	1.12875	0.174732	0.622562	1
ENSMUSG00000019854	Reps1	RalBP1 associated Eps domain containing protein	490.478	452.283	1.08426	0.116716	0.795505	1
ENSMUSG00000071392	Ect2l	epithelial cell transforming sequence 2 oncogene-like	8.86237	3.57667	2.15492	1.10764	0.520628	1
ENSMUSG00000059554	Ccdc28a	coiled-coil domain containing 28A	109.981	102.577	1.07149	0.0996149	0.841193	1
ENSMUSG00000039835	Nhsl1	NHS-like 1	962.204	960.926	1.00133	0.00191581	0.954774	1
ENSMUSG00000019851	Perp	PERP, TP53 apoptosis effector	532.149	449.93	1.18233	0.241634	0.469857	1
ENSMUSG00000019850	Tnfaip3	tumor necrosis factor, alpha-induced protein 3	2556.65	2246.91	1.13779	0.186231	0.595274	1
ENSMUSG00000020009	Ifngr1	interferon gamma receptor 1	1177.44	1053.39	1.11765	0.160468	0.78536	1
ENSMUSG00000069713	4933406P04Rik	RIKEN cDNA 4933406P04 gene	27.1028	26.0153	1.04025	0.056934	0.994249	1
ENSMUSG00000037608	Bclaf1	BCL2-associated transcription factor 1	2668.55	2552.02	1.04565	0.0643939	0.8359	1
ENSMUSG00000019992	Mtfr2	mitochondrial fission regulator 2	25.3923	18.6031	1.34634	0.42904	0.596962	1
ENSMUSG00000019990	Pde7b	phosphodiesterase 7B	338.79	327.705	1.03373	0.0478532	0.881186	1
ENSMUSG00000092051	Gm17229	predicted gene 17229	74.4707	64.3127	1.15553	0.208552	0.71475	1
ENSMUSG00000091730	Gm17230	predicted gene 17230	23.5205	21.4264	1.09338	0.128792	0.92374	1
ENSMUSG00000044268	Gm4895	predicted gene 4895	326.31	257.251	1.26741	0.341885	0.358502	1
ENSMUSG00000045680	Tcf21	transcription factor 21	64.8391	63.1776	1.02589	0.0368746	0.917502	1
ENSMUSG00000010461	Eya4	EYA transcriptional coactivator and phosphatase 4	29.9346	13.2271	2.17434	1.12058	0.279122	1
ENSMUSG00000077440	Gm23130	predicted gene, 23130	18.4626	16.9837	1.08223	0.114013	0.976802	1
ENSMUSG00000020010	Vnn3	vanin 3	15.1738	2.02459	5.34743	2.41885	0.126484	1
ENSMUSG00000037440	Vnn1	vanin 1	600.62	572.628	1.0488	0.0687366	0.852428	1
ENSMUSG00000087400	Gm15270	predicted gene 15270	23.7699	8.16563	2.70248	1.43429	0.286663	1
ENSMUSG00000019997	Ctgf	connective tissue growth factor	2001.35	942.93	2.12129	1.08494	0.247543	1
ENSMUSG00000037370	Enpp1	ectonucleotide pyrophosphatase/phosphodiesterase 1	687.917	649.561	1.05896	0.0826457	0.79813	1
ENSMUSG00000019984	Med23	mediator complex subunit 23	476.13	390.758	1.21792	0.28442	0.419715	1
ENSMUSG00000004360	9330159F19Rik	RIKEN cDNA 9330159F19 gene	4.15869	1.01229	2.56359	1.35816	0.650208	1
ENSMUSG00000038876	Rnf146	ring finger protein 146	589.123	540.506	1.08978	0.12404	0.682098	1
ENSMUSG00000019880	Rspo3	R-spondin 3	47.259	4.2291	9.22893	3.20616	0.198478	1
ENSMUSG00000069682	Gm10275	predicted pseudogene 10275	1408.36	1335.7	1.05436	0.0763676	0.830399	1
ENSMUSG00000019792	Trmt11	tRNA methyltransferase 11	85.5277	73.8622	1.15583	0.208924	0.791564	1
ENSMUSG00000019789	Hey2	hairy/enhancer-of-split related with YRPW motif 2	454.027	109.314	4.12482	2.04433	0.310716	1
ENSMUSG00000039684	Gm5422	predicted pseudogene 5422	446.103	380.243	1.17275	0.229897	0.5911	1
ENSMUSG00000063760	Rnf217	ring finger protein 217	150.264	92.4097	1.61936	0.695425	0.213296	1
ENSMUSG00000039552	Rsph4a	radial spoke head 4 homolog A (Chlamydomonas)	36.2607	28.9059	1.24593	0.317223	0.717413	1
ENSMUSG00000039531	Zufsp	zinc finger with UFM1-specific peptidase domain	392.631	274.753	1.42748	0.513472	0.181275	1
ENSMUSG00000046031	Fam26f	family with sequence similarity 26, member F	27.6792	6.25369	3.95374	1.98322	0.0886275	1
ENSMUSG00000047514	Tspyl1	testis-specific protein, Y-encoded-like 1	1088.81	960.317	1.13366	0.180986	0.593801	1
ENSMUSG00000039485	Tspyl4	TSPY-like 4	156.942	105.186	1.48741	0.572801	0.250041	1
ENSMUSG00000044499	Hs3st5	heparan sulfate (glucosamine) 3-O-sulfotransferase 5	5.13129	2.38445	1.81161	0.857272	0.720686	1
ENSMUSG00000069662	Marcks	myristoylated alanine rich protein kinase C substrate	1535.16	1044.89	1.46876	0.554598	0.262272	1
ENSMUSG00000051736	Fam229b	family with sequence similarity 229, member B	29.006	22.1461	1.29638	0.374484	0.65024	1
ENSMUSG00000019843	Fyn	Fyn proto-oncogene	876.354	606.362	1.44453	0.530603	0.129068	1
ENSMUSG00000085799	Gm6963	predicted gene 6963	20.173	16.9047	1.18254	0.241888	0.751076	1
ENSMUSG00000086915	Gm16365	predicted gene 16365	22.7386	5.24139	3.80342	1.9273	0.128922	1
ENSMUSG00000019842	Traf3ip2	TRAF3 interacting protein 2	196.639	125.094	1.56739	0.648363	0.18474	1
ENSMUSG00000087177	E130307A14Rik	RIKEN cDNA E130307A14 gene	163.757	111.788	1.46076	0.546723	0.230903	1
ENSMUSG00000039339	Mfsd4b2	major facilitator superfamily domain containing 4B2	10.1599	2.7443	2.98049	1.57555	0.3012	1
ENSMUSG00000071335	Mfsd4b3	major facilitator superfamily domain containing 4B3	175.694	166.518	1.05478	0.07694	0.859911	1
ENSMUSG00000038491	Cdk19os	cyclin-dependent kinase 19, opposite strand	4.99923	4.80253	1.0339	0.0480937	0.939732	1
ENSMUSG00000038481	Cdk19	cyclin-dependent kinase 19	833.055	538.693	1.54542	0.628003	0.347616	1
ENSMUSG00000045555	Mettl24	methyltransferase like 24	23.816	16.9837	1.37992	0.464583	0.676301	1
ENSMUSG00000019831	Wasf1	WAS protein family, member 1	33.4602	19.5481	1.67706	0.74593	0.403464	1
ENSMUSG00000038417	Fig4	FIG4 phosphoinositide 5-phosphatase	348.506	342.98	1.01607	0.0229932	1	1
ENSMUSG00000091415	Ak9	adenylate kinase 9	6.75368	4.76889	1.34405	0.426587	0.83709	1
ENSMUSG00000019823	Mical1	microtubule associated monooxygenase, calponin and LIM domain containing 1	495.446	220.179	2.24454	1.16642	0.166606	1
ENSMUSG00000019813	Cep57l1	centrosomal protein 57-like 1	68.5995	63.9982	1.07079	0.0986766	0.9656	1
ENSMUSG00000038332	Sesn1	sestrin 1	352.692	343.204	1.02757	0.0392312	0.895967	1
ENSMUSG00000071324	Armc2	armadillo repeat containing 2	19.8188	18.5358	1.06567	0.0917657	0.967786	1
ENSMUSG00000085666	Gm9855	predicted pseudogene 9855	22.7994	10.4374	2.08083	1.05716	0.503748	1
ENSMUSG00000019804	Snx3	sorting nexin 3	1406.92	1342.31	1.04809	0.0677678	0.831223	1
ENSMUSG00000019802	Sec63	SEC63-like (S. cerevisiae)	2077.27	1761.85	1.17892	0.237471	0.436602	1
ENSMUSG00000087719	Gm26464	predicted gene, 26464	5.51488	3.57667	1.4235	0.509441	0.830716	1
ENSMUSG00000038248	Sobp	sine oculis-binding protein homolog (Drosophila)	39.7989	16.7701	2.29593	1.19908	0.303715	1
ENSMUSG00000038214	Bend3	BEN domain containing 3	233.067	220.337	1.05751	0.0806732	0.877721	1
ENSMUSG00000045886	Gm9803	predicted gene 9803	169.687	141.605	1.19692	0.259322	0.591862	1
ENSMUSG00000047139	Cd24a	CD24a antigen	4688.7	3567.42	1.31422	0.39421	0.191947	1
ENSMUSG00000038160	Atg5	autophagy related 5	442.779	393.346	1.12535	0.170379	0.672388	1
ENSMUSG00000038151	Prdm1	PR domain containing 1, with ZNF domain	335.074	287.485	1.16496	0.220283	0.690249	1
ENSMUSG00000019849	Prep	prolyl endopeptidase	305.425	304.064	1.00446	0.0064224	0.960546	1
ENSMUSG00000038822	Hace1	HECT domain and ankyrin repeat containing, E3 ubiquitin protein ligase 1	247.736	184.391	1.34168	0.424043	0.334849	1
ENSMUSG00000056073	Grik2	glutamate receptor, ionotropic, kainate 2 (beta 2)	14.4359	4.40903	2.85374	1.51285	0.315597	1
ENSMUSG00000038774	Ascc3	activating signal cointegrator 1 complex subunit 3	1145.26	921.009	1.24322	0.314079	0.396976	1
ENSMUSG00000038594	Cep85l	centrosomal protein 85-like	428.634	229.167	1.86662	0.900428	0.225171	1
ENSMUSG00000038583	Pln	phospholamban	881.283	128.874	6.79336	2.76413	0.303849	1
ENSMUSG00000058298	Mcm9	minichromosome maintenance 9 homologous recombination repair factor	287.115	219.438	1.30701	0.386274	0.350649	1
ENSMUSG00000047669	Msl3l2	male-specific lethal 3-like 2 (Drosophila)	65.4448	28.1408	2.28013	1.18911	0.0646916	1
ENSMUSG00000019877	Serinc1	serine incorporator 1	2331.36	1917.7	1.2156	0.281663	0.369958	1
ENSMUSG00000019920	Lims1	LIM and senescent cell antigen-like domains 1	773.638	568.007	1.36139	0.445075	0.291005	1
ENSMUSG00000003226	Ranbp2	RAN binding protein 2	5423.09	4366.19	1.24201	0.312675	0.32868	1
ENSMUSG00000003227	Edar	ectodysplasin-A receptor	36.749	34.5408	1.06213	0.0869632	0.913476	1
ENSMUSG00000037990	Sh3rf3	SH3 domain containing ring finger 3	11.7382	8.23291	1.37965	0.464307	0.627964	1
ENSMUSG00000019917	Sept10	septin 10	455.892	291.477	1.56215	0.643529	0.0820794	1
ENSMUSG00000019916	P4ha1	procollagen-proline, 2-oxoglutarate 4-dioxygenase (proline 4-hydroxylase), alpha 1 polypeptide	975.07	886.309	1.10003	0.137549	0.681739	1
ENSMUSG00000009646	Pla2g12b	phospholipase A2, group XIIB	9.37802	1.37215	4.37494	2.12926	0.317625	1
ENSMUSG00000091184	Gm17059	predicted gene 17059	10.5435	8.88535	1.16773	0.223711	0.836518	1
ENSMUSG00000020108	Ddit4	DNA-damage-inducible transcript 4	331.433	243.979	1.35699	0.44041	0.225824	1
ENSMUSG00000058297	Spock2	sparc/osteonectin, cwcv and kazal-like domains proteoglycan 2	85.6431	36.7234	2.2968	1.19962	0.407638	1
ENSMUSG00000057337	Chst3	carbohydrate (chondroitin 6/keratan) sulfotransferase 3	150.524	76.7645	1.9485	0.962363	0.471486	1
ENSMUSG00000004207	Psap	prosaposin	11154.8	9839.46	1.13367	0.181002	0.559971	1
ENSMUSG00000012819	Cdh23	cadherin 23 (otocadherin)	40.4067	27.0613	1.47558	0.561286	0.516999	1
ENSMUSG00000020101	Vsir	V-set immunoregulatory receptor	932.902	571.809	1.63039	0.705217	0.101182	1
ENSMUSG00000020099	Unc5b	unc-5 netrin receptor B	666.177	351.404	1.89321	0.920837	0.204763	1
ENSMUSG00000020097	Sgpl1	sphingosine phosphate lyase 1	981.427	939.881	1.04416	0.0623381	0.877034	1
ENSMUSG00000059901	Adamts14	a disintegrin-like and metallopeptidase (reprolysin type) with thrombospondin type 1 motif, 14	36.3927	20.2005	1.76377	0.81866	0.374534	1
ENSMUSG00000061488	Rpl27a-ps1	ribosomal protein L27A, pseudogene 1	8.92107	6.5009	1.32265	0.403431	0.754257	1
ENSMUSG00000037151	Lrrc20	leucine rich repeat containing 20	68.0839	49.2073	1.37597	0.46045	0.435126	1
ENSMUSG00000020088	Sar1a	secretion associated Ras related GTPase 1A	1015.25	781.999	1.2979	0.376174	0.229911	1
ENSMUSG00000020085	Aifm2	apoptosis-inducing factor, mitochondrion-associated 2	177.503	151.942	1.16713	0.222965	0.653594	1
ENSMUSG00000020086	H2afy2	H2A histone family, member Y2	85.7478	34.1137	2.47049	1.3048	0.0790269	1
ENSMUSG00000058806	Col13a1	collagen, type XIII, alpha 1	40.9644	25.2166	1.60068	0.678684	0.364313	1
ENSMUSG00000020083	2010107G23Rik	RIKEN cDNA 2010107G23 gene	32.7518	26.6341	1.22138	0.288513	0.813764	1
ENSMUSG00000037031	Tspan15	tetraspanin 15	364.569	280.004	1.30094	0.379551	0.290095	1
ENSMUSG00000085347	Hk1os	hexokinase 1, opposite strand	9.62954	8.88535	1.07528	0.104716	0.907708	1
ENSMUSG00000020080	Hkdc1	hexokinase domain containing 1	69.7189	61.5684	1.13026	0.17666	0.792353	1
ENSMUSG00000020077	Srgn	serglycin	1396.63	1029.12	1.35676	0.440169	0.191128	1
ENSMUSG00000020075	Ddx21	DEAD (Asp-Glu-Ala-Asp) box polypeptide 21	1581.96	1437.8	1.10019	0.137757	0.636052	1
ENSMUSG00000036923	Stox1	storkhead box 1	46.7475	21.2801	2.14306	1.09967	0.15287	1
ENSMUSG00000020070	Rufy2	RUN and FYVE domain-containing 2	477.337	457.746	1.04271	0.0603325	0.794772	1
ENSMUSG00000020063	Sirt1	sirtuin 1	715.672	583.057	1.22706	0.295204	0.499289	1
ENSMUSG00000060843	Ctnna3	catenin (cadherin associated protein), alpha 3	497.7	137.23	3.60775	1.8511	0.387288	1
ENSMUSG00000062561	Gm10118	predicted gene 10118	76.2777	18.0969	4.04661	2.01671	0.341758	1
ENSMUSG00000019873	Reep3	receptor accessory protein 3	1333.16	1022.64	1.30335	0.382222	0.253101	1
ENSMUSG00000037876	Jmjd1c	jumonji domain containing 1C	5397.67	4131.17	1.3065	0.385705	0.202162	1
ENSMUSG00000037868	Egr2	early growth response 2	773.47	675.601	1.14465	0.194904	0.628709	1
ENSMUSG00000037855	Zfp365	zinc finger protein 365	17.3412	9.68407	1.71668	0.779623	0.542799	1
ENSMUSG00000019947	Arid5b	AT rich interactive domain 5B (MRF1-like)	2518.56	1583.08	1.59056	0.669531	0.292607	1
ENSMUSG00000060044	Tmem26	transmembrane protein 26	362.416	320.867	1.12909	0.175155	0.698383	1
ENSMUSG00000048701	Ccdc6	coiled-coil domain containing 6	1406.98	1184.22	1.18795	0.248468	0.463258	1
ENSMUSG00000043259	Fam13c	family with sequence similarity 13, member C	308.156	132.989	2.30732	1.20622	0.262335	1
ENSMUSG00000003923	Tfam	transcription factor A, mitochondrial	498.016	472.651	1.05355	0.0752596	0.865406	1
ENSMUSG00000019927	Ube2d1	ubiquitin-conjugating enzyme E2D 1	259.817	212.858	1.21958	0.286388	0.497204	1
ENSMUSG00000091825	Gm5778	predicted gene 5778	46.628	35.1142	1.31882	0.399243	0.529198	1
ENSMUSG00000009681	Bcr	breakpoint cluster region	1890.39	1781.65	1.061	0.0854303	0.753263	1
ENSMUSG00000033444	Specc1l	sperm antigen with calponin homology and coiled-coil domains 1-like	2010.38	1602.7	1.25421	0.326781	0.30264	1
ENSMUSG00000020178	Adora2a	adenosine A2a receptor	68.7463	37.7693	1.79901	0.8472	0.305129	1
ENSMUSG00000046807	Lrrc75b	leucine rich repeat containing 75B	50.4618	42.6728	1.17835	0.236768	0.759497	1
ENSMUSG00000006344	Ggt5	gamma-glutamyltransferase 5	56.4483	50.265	1.12062	0.164291	0.877443	1
ENSMUSG00000000902	Smarcb1	SWI/SNF related, matrix associated, actin dependent regulator of chromatin, subfamily b, member 1	619.668	595.033	1.04133	0.0584284	0.848638	1
ENSMUSG00000050157	Gm867	predicted gene 867	8.31737	6.1074	1.31094	0.390601	0.870824	1
ENSMUSG00000033208	S100b	S100 protein, beta polypeptide, neural	11.0004	4.76889	2.08019	1.05672	0.490354	1
ENSMUSG00000020231	Dip2a	disco interacting protein 2 homolog A	594.162	575.463	1.03244	0.0460542	0.894182	1
ENSMUSG00000089711	Gm16240	predicted gene 16240	10.1599	6.64719	1.45934	0.545319	0.716154	1
ENSMUSG00000001151	Pcnt	pericentrin (kendrin)	2452.8	2317.25	1.05847	0.0819832	0.759874	1
ENSMUSG00000001150	Mcm3ap	minichromosome maintenance complex component 3 associated protein	804.813	803.642	1.00146	0.0020991	0.950231	1
ENSMUSG00000009115	Spatc1l	spermatogenesis and centriole associated 1 like	21.177	11.4497	1.78133	0.832951	0.518513	1
ENSMUSG00000001120	Pcbp3	poly(rC) binding protein 3	202.143	187.596	1.07713	0.107197	0.813176	1
ENSMUSG00000001435	Col18a1	collagen, type XVIII, alpha 1	7733.86	5255.4	1.47151	0.557301	0.458794	1
ENSMUSG00000078444	Gm10941	predicted gene 10941	12.1512	3.07052	3.23083	1.69191	0.261815	1
ENSMUSG00000020260	Pofut2	protein O-fucosyltransferase 2	636.676	389.082	1.63472	0.709048	0.111218	1
ENSMUSG00000020262	Adarb1	adenosine deaminase, RNA-specific, B1	558.159	371.783	1.49996	0.584922	0.0918353	1
ENSMUSG00000020265	Sumo3	small ubiquitin-like modifier 3	1015.04	928.497	1.09311	0.128436	0.691805	1
ENSMUSG00000069581	Tspear	thrombospondin type laminin G domain and EAR repeats	6.37009	1.01229	3.66254	1.87284	0.42623	1
ENSMUSG00000009292	Trpm2	transient receptor potential cation channel, subfamily M, member 2	249.236	145.036	1.71353	0.776969	0.268257	1
ENSMUSG00000020277	Pfkl	phosphofructokinase, liver, B-type	1032.42	1000.75	1.03162	0.0449091	0.87567	1
ENSMUSG00000000732	Icosl	icos ligand	325.501	298.552	1.08997	0.124284	0.733773	1
ENSMUSG00000032834	Pwp2	PWP2 periodic tryptophan protein homolog (yeast)	220.159	163.032	1.34827	0.431109	0.330872	1
ENSMUSG00000000374	Trappc10	trafficking protein particle complex 10	912.511	890.81	1.02433	0.0346865	0.986577	1
ENSMUSG00000061032	Rrp1	ribosomal RNA processing 1 homolog (S. cerevisiae)	1854.08	1844.62	1.00512	0.00737196	0.946581	1
ENSMUSG00000005054	Cstb	cystatin B	291.599	254.495	1.14522	0.195628	0.568996	1
ENSMUSG00000032714	Syde1	synapse defective 1, Rho GTPase, homolog 1 (C. elegans)	615.692	416.435	1.47733	0.562996	0.205483	1
ENSMUSG00000060301	2610008E11Rik	RIKEN cDNA 2610008E11 gene	313.149	276.17	1.13342	0.180678	0.696514	1
ENSMUSG00000052151	Plpp2	phospholipid phosphatase 2	186.424	162.098	1.14915	0.200564	0.700653	1
ENSMUSG00000042570	Mier2	MIER family member 2	128.825	124.284	1.03625	0.0513694	0.877018	1
ENSMUSG00000020307	Cdc34	cell division cycle 34	237.492	232.012	1.02352	0.0335323	0.98379	1
ENSMUSG00000054206	Gzmm	granzyme M (lymphocyte met-ase 1)	19.8921	10.3701	1.83745	0.877709	0.454127	1
ENSMUSG00000020325	Fstl3	follistatin-like 3	88.1688	50.3659	1.73595	0.795728	0.167152	1
ENSMUSG00000006498	Ptbp1	polypyrimidine tract binding protein 1	1766.69	1740.51	1.01503	0.0215266	0.968301	1
ENSMUSG00000035781	R3hdm4	R3H domain containing 4	652.623	606.743	1.07549	0.104996	0.791443	1
ENSMUSG00000004665	Cnn2	calponin 2	682.484	378.297	1.80197	0.849579	0.275068	1
ENSMUSG00000035722	Abca7	ATP-binding cassette, sub-family A (ABC1), member 7	716.644	636.223	1.12621	0.171471	0.638867	1
ENSMUSG00000035673	Sbno2	strawberry notch homolog 2 (Drosophila)	3463.53	1690.67	2.04799	1.03421	0.298212	1
ENSMUSG00000003068	Stk11	serine/threonine kinase 11	1095.06	1005.85	1.0886	0.12248	0.729184	1
ENSMUSG00000035640	Cbarp	calcium channel, voltage-dependent, beta subunit associated regulatory protein	150.187	125.296	1.19708	0.259521	0.680547	1
ENSMUSG00000035621	Midn	midnolin	3309.19	2159.86	1.53188	0.615308	0.322144	1
ENSMUSG00000045193	Cirbp	cold inducible RNA binding protein	224.058	201.216	1.11295	0.154394	0.712071	1
ENSMUSG00000003070	Efna2	ephrin A2	14.2305	5.96111	2.18794	1.12957	0.397412	1
ENSMUSG00000020156	Mum1	melanoma associated antigen (mutated) 1	470.336	375.629	1.25146	0.323612	0.319287	1
ENSMUSG00000063457	Rps15	ribosomal protein S15	1864.83	1779.27	1.04806	0.0677233	0.857405	1
ENSMUSG00000020135	Apc2	adenomatosis polyposis coli 2	136.43	117.063	1.16404	0.219137	0.657796	1
ENSMUSG00000043822	Adamtsl5	ADAMTS-like 5	211.439	48.6222	4.28113	2.09799	0.0879483	1
ENSMUSG00000020167	Tcf3	transcription factor 3	768.408	545.163	1.40875	0.494417	0.150541	1
ENSMUSG00000003341	Atp8b3	ATPase, class I, type 8B, member 3	5.95716	1.37215	2.93285	1.5523	0.447097	1
ENSMUSG00000035397	Klf16	Kruppel-like factor 16	155.94	123.497	1.2606	0.334109	0.473468	1
ENSMUSG00000035370	Adat3	adenosine deaminase, tRNA-specific 3	16.7962	7.9857	1.9805	0.985863	0.444729	1
ENSMUSG00000003348	Mob3a	MOB kinase activator 3A	125.063	116.794	1.0702	0.0978739	0.951772	1
ENSMUSG00000035262	Amh	anti-Mullerian hormone	5.47086	3.39674	1.47174	0.557523	0.836492	1
ENSMUSG00000020216	Jsrp1	junctional sarcoplasmic reticulum protein 1	4.65966	1.37215	2.38588	1.25452	0.577433	1
ENSMUSG00000051067	Lingo3	leucine rich repeat and Ig domain containing 3	15.5867	7.9857	1.8459	0.884324	0.509747	1
ENSMUSG00000059406	Tmprss9	transmembrane protease, serine 9	5.45618	4.91518	1.09146	0.12626	1	1
ENSMUSG00000062075	Lmnb2	lamin B2	199.936	189.114	1.05692	0.0798659	0.857618	1
ENSMUSG00000015312	Gadd45b	growth arrest and DNA-damage-inducible 45 beta	1358.64	973.452	1.39529	0.480567	0.427797	1
ENSMUSG00000046822	Slc39a3	solute carrier family 39 (zinc transporter), member 3	327.134	265.08	1.23322	0.302425	0.475684	1
ENSMUSG00000035041	Creb3l3	cAMP responsive element binding protein 3-like 3	14.6288	6.79348	2.00537	1.00387	0.470972	1
ENSMUSG00000035011	Zbtb7a	zinc finger and BTB domain containing 7a	2045.64	1672.28	1.22313	0.290578	0.322991	1
ENSMUSG00000034994	Eef2	eukaryotic translation elongation factor 2	19442.4	18483.5	1.05188	0.0729676	0.829326	1
ENSMUSG00000064441	Snord37	small nucleolar RNA, C/D box 37	10.9124	9.53778	1.13044	0.176889	0.911713	1
ENSMUSG00000085779	Atcayos	ataxia, cerebellar, Cayman type, opposite strand	41.6708	6.25369	5.88263	2.55646	0.226606	1
ENSMUSG00000034958	Atcay	ataxia, cerebellar, Cayman type	6.78303	1.37215	3.281	1.71414	0.376582	1
ENSMUSG00000034949	Zfr2	zinc finger RNA binding protein 2	122.803	92.9042	1.3184	0.398785	0.673632	1
ENSMUSG00000034932	Mrpl54	mitochondrial ribosomal protein L54	364.577	336.523	1.08312	0.11519	0.743566	1
ENSMUSG00000034902	Pip5k1c	phosphatidylinositol-4-phosphate 5-kinase, type 1 gamma	2092.35	1851.71	1.12988	0.176175	0.588684	1
ENSMUSG00000034889	Cactin	cactin, spliceosome C complex subunit	462.549	372.289	1.2418	0.312428	0.368875	1
ENSMUSG00000034872	Gipc3	GIPC PDZ domain containing family, member 3	56.8613	27.1066	2.05864	1.04169	0.191621	1
ENSMUSG00000020234	4930404N11Rik	RIKEN cDNA 4930404N11 gene	6.63629	3.07052	1.876	0.907658	0.629977	1
ENSMUSG00000078440	Dohh	deoxyhypusine hydroxylase/monooxygenase	265.51	251.357	1.05608	0.0787253	0.814729	1
ENSMUSG00000055053	Nfic	nuclear factor I/C	2794.74	2702.92	1.03396	0.0481751	0.853437	1
ENSMUSG00000085327	Gm16104	predicted gene 16104	17.7101	7.65948	2.16065	1.11146	0.361884	1
ENSMUSG00000034818	Celf5	CUGBP, Elav-like family member 5	11.0591	3.7566	2.53524	1.34212	0.388747	1
ENSMUSG00000044199	S1pr4	sphingosine-1-phosphate receptor 4	17.6514	15.8251	1.10854	0.148666	0.912118	1
ENSMUSG00000034781	Gna11	guanine nucleotide binding protein, alpha 11	1144.78	907.185	1.26162	0.335277	0.320366	1
ENSMUSG00000034771	Tle2	transducin-like enhancer of split 2	391.376	326.131	1.19945	0.262369	0.502815	1
ENSMUSG00000034758	Tle6	transducin-like enhancer of split 6	43.4273	20.1669	2.09891	1.06964	0.228941	1
ENSMUSG00000034748	Sirt6	sirtuin 6	90.8665	73.716	1.22954	0.298123	0.649014	1
ENSMUSG00000061371	Zfp873	zinc finger protein 873	45.6261	29.1985	1.54399	0.626661	0.445697	1
ENSMUSG00000078435	AU041133	expressed sequence AU041133	42.6622	17.8833	2.31221	1.20927	0.129203	1
ENSMUSG00000087481	Gm15608	predicted gene 15608	12.5788	7.69312	1.56201	0.643407	0.580125	1
ENSMUSG00000062931	Zfp938	zinc finger protein 938	52.9688	46.9692	1.12507	0.170017	0.796766	1
ENSMUSG00000020251	Glt8d2	glycosyltransferase 8 domain containing 2	12.0778	10.4828	1.1389	0.187646	1	1
ENSMUSG00000020246	Hcfc2	host cell factor C2	229.153	228.525	1.00274	0.00394527	0.991472	1
ENSMUSG00000020248	Nfyb	nuclear transcription factor-Y beta	590.052	478.769	1.23195	0.300945	0.377872	1
ENSMUSG00000020250	Txnrd1	thioredoxin reductase 1	2336.72	1954.41	1.19552	0.257637	0.369331	1
ENSMUSG00000090200	1700025N21Rik	RIKEN cDNA 1700025N21 gene	8.46411	0.506147	6.28366	2.6516	0.191521	1
ENSMUSG00000034591	Slc41a2	solute carrier family 41, member 2	177.046	157.757	1.1215	0.165433	0.738964	1
ENSMUSG00000020256	Aldh1l2	aldehyde dehydrogenase 1 family, member L2	68.4487	51.2773	1.32847	0.409762	0.78604	1
ENSMUSG00000087651	1500009L16Rik	RIKEN cDNA 1500009L16 gene	20.4958	6.07376	3.03881	1.60351	0.576827	1
ENSMUSG00000046841	Ckap4	cytoskeleton-associated protein 4	484.351	313.511	1.54319	0.62592	0.08312	1
ENSMUSG00000020034	Tcp11l2	t-complex 11 (mouse) like 2	349.334	291.713	1.19685	0.259246	0.496727	1
ENSMUSG00000089096	Gm25657	predicted gene, 25657	6.3114	4.91518	1.23604	0.305726	0.952393	1
ENSMUSG00000034453	Polr3b	polymerase (RNA) III (DNA directed) polypeptide B	452.077	388.622	1.16286	0.217681	0.604245	1
ENSMUSG00000020037	Rfx4	regulatory factor X, 4 (influences HLA class II expression)	6.28205	1.01229	3.61878	1.8555	0.430231	1
ENSMUSG00000035620	Ric8b	RIC8 guanine nucleotide exchange factor B	544.423	488.049	1.11527	0.157397	0.689635	1
ENSMUSG00000060935	Tmem263	transmembrane protein 263	152.817	127.512	1.19691	0.25931	0.596944	1
ENSMUSG00000020038	Cry1	cryptochrome 1 (photolyase-like)	90.4075	61.782	1.45595	0.541962	0.330904	1
ENSMUSG00000020042	Btbd11	BTB (POZ) domain containing 11	135.074	107.007	1.25985	0.333256	0.469297	1
ENSMUSG00000035529	Prdm4	PR domain containing 4	412.557	307.055	1.34248	0.424898	0.263396	1
ENSMUSG00000085111	Ascl4	achaete-scute family bHLH transcription factor 4	17.0037	7.44591	2.13164	1.09196	0.579862	1
ENSMUSG00000077265	Gm24430	predicted gene, 24430	3.33282	3.07052	1.06444	0.0900919	1	1
ENSMUSG00000020044	Timp3	tissue inhibitor of metalloproteinase 3	21214.3	20798.2	1.02	0.0285761	0.86864	1
ENSMUSG00000020048	Hsp90b1	heat shock protein 90, beta (Grp94), member 1	9601.56	8001.82	1.1999	0.262912	0.359132	1
ENSMUSG00000020053	Igf1	insulin-like growth factor 1	443.315	332.371	1.33279	0.414454	0.356576	1
ENSMUSG00000035311	Gnptab	N-acetylglucosamine-1-phosphate transferase, alpha and beta subunits	988.963	858.079	1.15235	0.204585	0.5595	1
ENSMUSG00000087429	Gm16235	predicted gene 16235	8.44944	3.54303	2.07999	1.05657	0.634769	1
ENSMUSG00000020059	Sycp3	synaptonemal complex protein 3	21.1016	20.1215	1.0464	0.0654375	0.92044	1
ENSMUSG00000004359	Spic	Spi-C transcription factor (Spi-1/PU.1 related)	44.3286	38.0838	1.15978	0.213849	0.789679	1
ENSMUSG00000060904	Arl1	ADP-ribosylation factor-like 1	509.312	487.947	1.0437	0.0617007	0.848618	1
ENSMUSG00000074802	Gas2l3	growth arrest-specific 2 like 3	70.5048	50.0061	1.40189	0.487372	0.492965	1
ENSMUSG00000058589	Anks1b	ankyrin repeat and sterile alpha motif domain containing 1B	24.9941	18.0633	1.36357	0.447387	0.621547	1
ENSMUSG00000019979	Apaf1	apoptotic peptidase activating factor 1	351.977	248.5	1.41474	0.500535	0.173285	1
ENSMUSG00000019975	Ikbip	IKBKB interacting protein	377.508	284.504	1.32575	0.406813	0.282733	1
ENSMUSG00000019961	Tmpo	thymopoietin	1281.05	1149.02	1.11481	0.156799	0.657822	1
ENSMUSG00000019988	Nedd1	neural precursor cell expressed, developmentally down-regulated gene 1	241.026	183.705	1.31034	0.38994	0.382403	1
ENSMUSG00000020015	Cdk17	cyclin-dependent kinase 17	827.162	490.94	1.68346	0.751432	0.178627	1
ENSMUSG00000089214	Mir1931	microRNA 1931	8.39074	6.5009	1.25195	0.324175	0.793379	1
ENSMUSG00000020017	Hal	histidine ammonia lyase	13.4487	10.0439	1.30829	0.387683	0.77187	1
ENSMUSG00000020019	Ntn4	netrin 4	2895.63	2094.1	1.38257	0.467355	0.338862	1
ENSMUSG00000085723	Gm15915	predicted gene 15915	15.9703	13.2607	1.19	0.250963	0.864746	1
ENSMUSG00000086891	Gm15963	predicted gene 15963	7.68227	2.56437	2.43585	1.28442	0.521832	1
ENSMUSG00000036099	Vezt	vezatin, adherens junctions transmembrane protein	496.693	383.188	1.29544	0.373445	0.276898	1
ENSMUSG00000020021	Fgd6	FYVE, RhoGEF and PH domain containing 6	644.953	422.015	1.52702	0.610722	0.0776196	1
ENSMUSG00000005897	Nr2c1	nuclear receptor subfamily 2, group C, member 1	201.051	199.945	1.0055	0.00791572	0.974871	1
ENSMUSG00000020023	Tmcc3	transmembrane and coiled coil domains 3	1069.97	849.113	1.2598	0.333191	0.288677	1
ENSMUSG00000085409	Gm16155	predicted gene 16155	13.0211	10.7636	1.1919	0.25326	0.791723	1
ENSMUSG00000074785	Plxnc1	plexin C1	251.534	152.921	1.64067	0.714289	0.117875	1
ENSMUSG00000020027	Socs2	suppressor of cytokine signaling 2	337.894	295.392	1.1434	0.193326	0.662858	1
ENSMUSG00000074781	Ube2n	ubiquitin-conjugating enzyme E2N	309.793	308.629	1.00376	0.00541241	0.980363	1
ENSMUSG00000092867	Mir3058	microRNA 3058	22.6506	20.4141	1.10444	0.143317	0.902707	1
ENSMUSG00000036499	Eea1	early endosome antigen 1	3031.84	2615.69	1.15904	0.212928	0.462714	1
ENSMUSG00000036478	Btg1	B cell translocation gene 1, anti-proliferative	3377.97	2737.51	1.23387	0.30319	0.470725	1
ENSMUSG00000019943	Atp2b1	ATPase, Ca++ transporting, plasma membrane 1	2998.69	2482.99	1.20761	0.272155	0.3349	1
ENSMUSG00000019952	Poc1b	POC1 centriolar protein B	206.346	141.459	1.45547	0.54149	0.221179	1
ENSMUSG00000090035	Galnt4	UDP-N-acetyl-alpha-D-galactosamine:polypeptide N-acetylgalactosaminyltransferase 4	277.674	244.846	1.13353	0.180825	0.708436	1
ENSMUSG00000019960	Dusp6	dual specificity phosphatase 6	1371.35	1081.55	1.2677	0.342208	0.29447	1
ENSMUSG00000046934	Csl	citrate synthase like	45.7141	35.5531	1.27798	0.353865	0.629725	1
ENSMUSG00000019966	Kitl	kit ligand	1506.63	877.422	1.71629	0.779293	0.172988	1
ENSMUSG00000036676	Tmtc3	transmembrane and tetratricopeptide repeat containing 3	475.032	421.384	1.12701	0.172502	0.605055	1
ENSMUSG00000019971	Cep290	centrosomal protein 290	673.622	666.757	1.01028	0.0147557	0.893247	1
ENSMUSG00000044921	Rassf9	Ras association (RalGDS/AF-6) domain family (N-terminal) member 9	256.512	168.611	1.51825	0.602409	0.178922	1
ENSMUSG00000019892	Lrriq1	leucine-rich repeats and IQ motif containing 1	36.4828	32.0437	1.13434	0.181854	0.769815	1
ENSMUSG00000036019	Tmtc2	transmembrane and tetratricopeptide repeat containing 2	155.852	118.222	1.31564	0.39576	0.396387	1
ENSMUSG00000084399	Gm15666	predicted gene 15666	16.7081	12.9345	1.27081	0.345747	0.768889	1
ENSMUSG00000085282	Gm15663	predicted gene 15663	20.2023	18.862	1.06748	0.0942136	0.980208	1
ENSMUSG00000036009	Mettl25	methyltransferase like 25	68.6142	55.5064	1.23197	0.300967	0.704283	1
ENSMUSG00000019897	Ccdc59	coiled-coil domain containing 59	546.027	483.516	1.12902	0.175068	0.626673	1
ENSMUSG00000091455	Otogl	otogelin-like	11.1178	2.53073	3.43209	1.77909	0.565434	1
ENSMUSG00000019907	Ppp1r12a	protein phosphatase 1, regulatory (inhibitor) subunit 12A	6478.84	3014.18	2.14907	1.10371	0.329546	1
ENSMUSG00000035873	Pawr	PRKC, apoptosis, WT1, regulator	1122.39	1040.78	1.07834	0.108812	0.660056	1
ENSMUSG00000020181	Nav3	neuron navigator 3	43.1632	39.0625	1.10236	0.140591	0.909298	1
ENSMUSG00000020185	E2f7	E2F transcription factor 7	51.5812	33.7875	1.5115	0.59598	0.452284	1
ENSMUSG00000035798	Zdhhc17	zinc finger, DHHC domain containing 17	616.847	576.925	1.06908	0.0963671	0.754442	1
ENSMUSG00000091086	Rpl6l	ribosomal protein L6-like	527.468	410.509	1.28422	0.360891	0.328214	1
ENSMUSG00000035759	Bbs10	Bardet-Biedl syndrome 10 (human)	30.6871	24.7895	1.22868	0.297114	0.791191	1
ENSMUSG00000058799	Nap1l1	nucleosome assembly protein 1-like 1	622.609	616.123	1.01051	0.0150821	0.985579	1
ENSMUSG00000020205	Phlda1	pleckstrin homology like domain, family A, member 1	715.431	571.256	1.25194	0.324167	0.506795	1
ENSMUSG00000056888	Glipr1	GLI pathogenesis-related 1 (glioma)	93.2435	83.8725	1.11041	0.151095	0.862199	1
ENSMUSG00000035694	Caps2	calcyphosphine 2	4.27608	1.8783	1.83305	0.87425	0.728418	1
ENSMUSG00000020130	Tbc1d15	TBC1 domain family, member 15	757.714	737.685	1.02711	0.0385969	0.898224	1
ENSMUSG00000034163	Zfc3h1	zinc finger, C3H1-type containing	1572.02	1569.41	1.00166	0.0023973	0.978909	1
ENSMUSG00000020140	Lgr5	leucine rich repeat containing G protein coupled receptor 5	272.579	116.456	2.3292	1.21984	0.0917476	1
ENSMUSG00000092210	A930009A15Rik	RIKEN cDNA A930009A15 gene	5.95716	4.04917	1.37788	0.462452	0.937298	1
ENSMUSG00000034127	Tspan8	tetraspanin 8	953.787	677.883	1.40641	0.492015	0.340349	1
ENSMUSG00000054934	Kcnmb4	potassium large conductance calcium-activated channel, subfamily M, beta member 4	6.29672	5.27504	1.16282	0.217625	0.946403	1
ENSMUSG00000052291	5330438D12Rik	RIKEN cDNA 5330438D12 gene	16.8255	14.3403	1.162	0.216615	0.798512	1
ENSMUSG00000020169	Best3	bestrophin 3	45.9929	31.4367	1.44876	0.534819	0.502064	1
ENSMUSG00000020170	Frs2	fibroblast growth factor receptor substrate 2	712.832	698.972	1.0198	0.0282874	0.958508	1
ENSMUSG00000069516	Lyz2	lysozyme 2	5402.8	2407.33	2.24379	1.16594	0.397512	1
ENSMUSG00000069515	Lyz1	lysozyme 1	59.7706	24.8567	2.35028	1.23283	0.418323	1
ENSMUSG00000055531	Cpsf6	cleavage and polyadenylation specific factor 6	894.77	876.568	1.02074	0.0296185	0.920912	1
ENSMUSG00000043800	Kifc5c-ps	kinesin family member C5C, pseudogene	5.98651	0	6.98651	2.80457	0.33584	1
ENSMUSG00000020183	Cpm	carboxypeptidase M	338.187	234.654	1.43934	0.525409	0.165475	1
ENSMUSG00000020184	Mdm2	transformed mouse 3T3 cell double minute 2	1353.34	1174.76	1.15188	0.203994	0.511816	1
ENSMUSG00000052798	Nup107	nucleoporin 107	155.634	147.195	1.05695	0.0799045	0.84366	1
ENSMUSG00000052681	Rap1b	RAS related protein 1b	1795.71	1378.67	1.30227	0.381027	0.214103	1
ENSMUSG00000028630	Dyrk2	dual-specificity tyrosine-(Y)-phosphorylation regulated kinase 2	413.504	358.343	1.15351	0.206027	0.552277	1
ENSMUSG00000044544	4921513I03Rik	RIKEN cDNA 4921513I03 gene	8.50813	1.01229	4.72502	2.24032	0.273803	1
ENSMUSG00000051236	Msrb3	methionine sulfoxide reductase B3	1909.4	538.955	3.53808	1.82297	0.177006	1
ENSMUSG00000086444	Gm15961	predicted gene 15961	7.56487	3.03688	2.12166	1.08519	0.640649	1
ENSMUSG00000087480	Gm15910	predicted gene 15910	63.833	36.1265	1.74627	0.804278	0.572325	1
ENSMUSG00000086522	Gm4473	predicted gene 4473	13.0211	1.01229	6.9677	2.80068	0.0998472	1
ENSMUSG00000048661	Lemd3	LEM domain containing 3	476.761	472.211	1.00962	0.013806	0.927433	1
ENSMUSG00000082936	Gm16166	predicted gene 16166	8.77433	7.65948	1.12874	0.174716	0.936825	1
ENSMUSG00000020218	Wif1	Wnt inhibitory factor 1	5.11662	3.54303	1.34638	0.429081	0.961554	1
ENSMUSG00000052302	Tbc1d30	TBC1 domain family, member 30	104.183	97.515	1.06769	0.0944873	0.841317	1
ENSMUSG00000034707	Gns	glucosamine (N-acetyl)-6-sulfatase	4497.99	4249.75	1.0584	0.0818834	0.774393	1
ENSMUSG00000025795	Rassf3	Ras association (RalGDS/AF-6) domain family member 3	1415.2	1115.53	1.26839	0.342999	0.549316	1
ENSMUSG00000020115	Tbk1	TANK-binding kinase 1	889.104	750.226	1.18487	0.244728	0.448428	1
ENSMUSG00000034667	Xpot	exportin, tRNA (nuclear export receptor for tRNAs)	838.353	837.54	1.00097	0.00139773	0.989539	1
ENSMUSG00000053684	BC048403	cDNA sequence BC048403	86.3724	81.3637	1.06081	0.0851686	0.865877	1
ENSMUSG00000034620	Tmem5	transmembrane protein 5	303.169	226.906	1.33463	0.416438	0.287393	1
ENSMUSG00000034602	Mon2	MON2 homolog, regulator of endosome to Golgi trafficking	1511.53	1464.17	1.03233	0.0459019	0.89775	1
ENSMUSG00000020124	Usp15	ubiquitin specific peptidase 15	1029.13	948.563	1.08484	0.117486	0.720063	1
ENSMUSG00000020105	Lrig3	leucine-rich repeats and immunoglobulin-like domains 3	219.235	208.403	1.05172	0.0727557	0.857277	1
ENSMUSG00000078429	Ctdsp2	CTD (carboxy-terminal domain, RNA polymerase II, polypeptide A) small phosphatase 2	1317.31	1128.17	1.1675	0.223424	0.490499	1
ENSMUSG00000025432	Avil	advillin	74.1417	36.4864	2.00451	1.00325	0.29713	1
ENSMUSG00000080115	Mettl21b	methyltransferase like 21B	47.2338	43.6851	1.07942	0.110251	0.907307	1
ENSMUSG00000006724	Cyp27b1	cytochrome P450, family 27, subfamily b, polypeptide 1	55.8614	47.0818	1.1826	0.241957	0.769701	1
ENSMUSG00000006728	Cdk4	cyclin-dependent kinase 4	403.789	383.447	1.05291	0.0743865	0.800728	1
ENSMUSG00000025422	Agap2	ArfGAP with GTPase domain, ankyrin repeat and PH domain 2	82.4191	81.2291	1.01447	0.0207287	1	1
ENSMUSG00000040441	Slc26a10	solute carrier family 26, member 10	103.15	73.3107	1.40154	0.487017	0.366453	1
ENSMUSG00000019467	Arhgef25	Rho guanine nucleotide exchange factor (GEF) 25	422.686	88.4498	4.73658	2.24385	0.103322	1
ENSMUSG00000040415	Dtx3	deltex 3, E3 ubiquitin ligase	514.774	457.871	1.12401	0.168652	0.597898	1
ENSMUSG00000074657	Kif5a	kinesin family member 5A	47.8815	34.4735	1.37797	0.462546	0.56911	1
ENSMUSG00000092593	Gm20492	predicted gene 20492	11.428	10.0439	1.12533	0.170343	0.92655	1
ENSMUSG00000040354	Mars	methionine-tRNA synthetase	482.444	461.256	1.04584	0.0646566	0.790288	1
ENSMUSG00000025404	R3hdm2	R3H domain containing 2	2607.7	2565.8	1.01633	0.0233637	0.927086	1
ENSMUSG00000040287	Stac3	SH3 and cysteine rich domain 3	18.3892	14.6329	1.24028	0.310668	0.785888	1
ENSMUSG00000040280	Ndufa4l2	NADH dehydrogenase (ubiquinone) 1 alpha subcomplex, 4-like 2	83.918	30.0309	2.73657	1.45237	0.238345	1
ENSMUSG00000040258	Nxph4	neurexophilin 4	13.6268	3.90288	2.98331	1.57691	0.553178	1
ENSMUSG00000002147	Stat6	signal transducer and activator of transcription 6	1722.42	1660.29	1.0374	0.0529712	0.878382	1
ENSMUSG00000025402	Nab2	Ngfi-A binding protein 2	399.337	312.171	1.27833	0.354266	0.448579	1
ENSMUSG00000040195	Nemp1	nuclear envelope integral membrane protein 1	119.017	95.941	1.23804	0.308063	0.612011	1
ENSMUSG00000025401	Myo1a	myosin IA	6.69498	0.506147	5.10905	2.35306	0.293452	1
ENSMUSG00000044617	Zbtb39	zinc finger and BTB domain containing 39	409.272	401.937	1.0182	0.0260277	0.890786	1
ENSMUSG00000058396	Gpr182	G protein-coupled receptor 182	162.155	73.3897	2.19325	1.13307	0.0886747	1
ENSMUSG00000054031	Rdh18-ps	retinol dehydrogenase 18, pseudogene	15.7208	13.1144	1.18466	0.244474	0.866415	1
ENSMUSG00000054052	Rdh19	retinol dehydrogenase 19	28.6538	7.62584	3.43779	1.78148	0.320037	1
ENSMUSG00000090036	Gm15900	predicted gene 15900	31.8966	30.0645	1.05898	0.0826697	0.982855	1
ENSMUSG00000071072	Ptges3	prostaglandin E synthase 3 (cytosolic)	599.065	491.265	1.21899	0.285685	0.391409	1
ENSMUSG00000040054	Baz2a	bromodomain adjacent to zinc finger domain, 2A	2580.88	2389.95	1.07986	0.110839	0.696391	1
ENSMUSG00000040043	Rbms2	RNA binding motif, single stranded interacting protein 2	988.825	798.748	1.23767	0.307628	0.50438	1
ENSMUSG00000039994	Timeless	timeless circadian clock 1	652.611	420.923	1.54912	0.63145	0.313715	1
ENSMUSG00000040033	Stat2	signal transducer and activator of transcription 2	1469.12	748.245	1.96214	0.972428	0.286446	1
ENSMUSG00000025383	Il23a	interleukin 23, alpha subunit p19	14.9076	4.11646	3.1091	1.6365	0.376662	1
ENSMUSG00000090761	Gm17201	predicted gene 17201	24.4637	23.3047	1.04769	0.0672116	0.972382	1
ENSMUSG00000025373	Rnf41	ring finger protein 41	480.729	385.382	1.24677	0.318194	0.380289	1
ENSMUSG00000090841	Myl6	myosin, light polypeptide 6, alkali, smooth muscle and non-muscle	951.037	588.388	1.6153	0.6918	0.334286	1
ENSMUSG00000039824	Myl6b	myosin, light polypeptide 6B	67.5535	54.3025	1.23961	0.309888	0.593231	1
ENSMUSG00000025366	Esyt1	extended synaptotagmin-like protein 1	1481.65	942.368	1.57166	0.652289	0.366773	1
ENSMUSG00000039810	Zc3h10	zinc finger CCCH type containing 10	295.061	290.711	1.01491	0.0213586	0.846229	1
ENSMUSG00000093674	Rpl41	ribosomal protein L41	1757.87	1703.2	1.03208	0.0455556	0.865078	1
ENSMUSG00000025364	Pa2g4	proliferation-associated 2G4	1000.9	887.229	1.12798	0.173742	0.546933	1
ENSMUSG00000002578	Ikzf4	IKAROS family zinc finger 4	150.732	108.526	1.38535	0.47025	0.532723	1
ENSMUSG00000000711	Rab5b	RAB5B, member RAS oncogene family	595.059	592.247	1.00474	0.00682403	0.928454	1
ENSMUSG00000025358	Cdk2	cyclin-dependent kinase 2	202.615	141.368	1.4302	0.516212	0.200412	1
ENSMUSG00000025359	Pmel	premelanosome protein	8.77433	8.52549	1.02612	0.0372042	0.986263	1
ENSMUSG00000025355	Mmp19	matrix metallopeptidase 19	33.106	10.6627	2.92436	1.54812	0.134647	1
ENSMUSG00000025354	Dnajc14	DnaJ heat shock protein family (Hsp40) member C14	783.59	738.687	1.06071	0.0850249	0.824159	1
ENSMUSG00000078427	Sarnp	SAP domain containing ribonucleoprotein	55.9914	37.4314	1.48294	0.568458	0.403039	1
ENSMUSG00000025352	Gdf11	growth differentiation factor 11	565.345	157.689	3.56889	1.83548	0.252952	1
ENSMUSG00000025348	Itga7	integrin alpha 7	710.789	112.114	6.29265	2.65367	0.22812	1
ENSMUSG00000034833	Tespa1	thymocyte expressed, positive selection associated 1	13.7442	12.2148	1.11573	0.157993	0.972497	1
ENSMUSG00000040540	Gm9770	predicted gene 9770	489.132	356.049	1.37273	0.457049	0.213593	1
ENSMUSG00000082286	Pisd-ps1	phosphatidylserine decarboxylase, pseudogene 1	401.974	271.401	1.47934	0.564953	0.145329	1
ENSMUSG00000023764	Sfi1	Sfi1 homolog, spindle assembly associated (yeast)	801.74	705.775	1.13578	0.183682	0.565125	1
ENSMUSG00000087111	Gm11399	predicted gene 11399	15.5867	12.6419	1.21586	0.281978	0.752668	1
ENSMUSG00000081208	Gm11400	predicted gene 11400	86.3997	80.2051	1.07628	0.106057	0.807202	1
ENSMUSG00000086049	Gm12735	predicted gene 12735	7.23998	6.14104	1.15389	0.206507	0.91672	1
ENSMUSG00000020454	Eif4enif1	eukaryotic translation initiation factor 4E nuclear import factor 1	855.77	731.396	1.16982	0.226284	0.445071	1
ENSMUSG00000053263	Gm12592	predicted gene 12592	31.513	18.3895	1.67683	0.745741	0.390257	1
ENSMUSG00000020451	Limk2	LIM motif-containing protein kinase 2	459.057	457.073	1.00433	0.00623445	0.994639	1
ENSMUSG00000020448	Rnf185	ring finger protein 185	356.568	336.58	1.05921	0.0829877	0.868394	1
ENSMUSG00000034587	8430429K09Rik	RIKEN cDNA 8430429K09 gene	62.0093	57.1594	1.08339	0.115552	0.858236	1
ENSMUSG00000081059	Gm11945	predicted gene 11945	55.8006	52.2106	1.06747	0.0941937	0.905111	1
ENSMUSG00000020439	Smtn	smoothelin	2396.15	1658.92	1.44413	0.530201	0.316733	1
ENSMUSG00000087291	Gm11946	predicted gene 11946	81.0735	78.991	1.02603	0.0370792	0.998044	1
ENSMUSG00000056579	Tug1	taurine upregulated gene 1	1060.35	947.317	1.11919	0.162457	0.675211	1
ENSMUSG00000034543	Morc2a	microrchidia 2A	793.306	765.701	1.036	0.0510301	0.844684	1
ENSMUSG00000020435	Osbp2	oxysterol binding protein 2	79.6187	54.8876	1.44252	0.528587	0.539696	1
ENSMUSG00000084077	Gm11952	predicted gene 11952	15.1444	14.273	1.05705	0.0800494	1	1
ENSMUSG00000047205	Dusp18	dual specificity phosphatase 18	243.43	220.933	1.10137	0.139299	0.70308	1
ENSMUSG00000048807	Slc35e4	solute carrier family 35, member E4	271.061	185.042	1.46237	0.548305	0.286608	1
ENSMUSG00000082816	Gm11953	predicted gene 11953	4.99923	1.01229	2.98129	1.57594	0.55378	1
ENSMUSG00000020430	Pes1	pescadillo ribosomal biogenesis factor 1	293.632	259.985	1.12892	0.174946	0.709093	1
ENSMUSG00000003585	Sec14l2	SEC14-like lipid binding 2	59.6344	32.7298	1.79765	0.846113	0.185278	1
ENSMUSG00000093080	Mir3060	microRNA 3060	6.70966	5.48861	1.18818	0.248758	0.823093	1
ENSMUSG00000051427	Ccdc157	coiled-coil domain containing 157	366.646	268.633	1.3635	0.447317	0.224216	1
ENSMUSG00000034394	Lif	leukemia inhibitory factor	139.744	57.9918	2.38582	1.25449	0.37086	1
ENSMUSG00000034354	Mtmr3	myotubularin related protein 3	1778.44	1640.43	1.08408	0.116477	0.702138	1
ENSMUSG00000020412	Ascc2	activating signal cointegrator 1 complex subunit 2	709.784	704.042	1.00814	0.011702	0.909275	1
ENSMUSG00000009076	Zmat5	zinc finger, matrin type 5	79.7047	74.165	1.0737	0.102591	0.767175	1
ENSMUSG00000020396	Nefh	neurofilament, heavy polypeptide	17.3852	5.96111	2.64113	1.40115	0.266033	1
ENSMUSG00000034201	Gas2l1	growth arrest-specific 2 like 1	527.665	349.4	1.50875	0.593351	0.0793623	1
ENSMUSG00000034164	Emid1	EMI domain containing 1	152.901	87.3702	1.74155	0.800372	0.187111	1
ENSMUSG00000020393	Kremen1	kringle containing transmembrane protein 1	601.769	595.077	1.01123	0.0161063	0.898875	1
ENSMUSG00000020484	Xbp1	X-box binding protein 1	1248.17	1217.92	1.02482	0.0353694	0.942884	1
ENSMUSG00000083844	Ube2d-ps	ubiquitin-conjugating enzyme E2D, pseudogene	239.865	177.586	1.34873	0.431606	0.29432	1
ENSMUSG00000020476	Dbnl	drebrin-like	1082.06	1005.53	1.07603	0.105721	0.703864	1
ENSMUSG00000020474	Polm	polymerase (DNA directed), mu	116.114	98.9545	1.17168	0.228573	0.594602	1
ENSMUSG00000002741	Ykt6	YKT6 v-SNARE homolog (S. cerevisiae)	390.908	359.669	1.08661	0.119839	0.706971	1
ENSMUSG00000053838	Nudcd3	NudC domain containing 3	1473.14	1429.52	1.03049	0.0433272	0.888326	1
ENSMUSG00000004393	Ddx56	DEAD (Asp-Glu-Ala-Asp) box polypeptide 56	207.073	175.494	1.17892	0.237472	0.581269	1
ENSMUSG00000004394	Tmed4	transmembrane p24 trafficking protein 4	876.93	798.039	1.09873	0.13584	0.681225	1
ENSMUSG00000071866	Ppia	peptidylprolyl isomerase A	124.87	114.837	1.08661	0.119839	0.885019	1
ENSMUSG00000000378	Ccm2	cerebral cavernous malformation 2	257.929	240.144	1.07375	0.102658	0.851978	1
ENSMUSG00000041073	Nacad	NAC alpha domain containing	153.299	100.101	1.52618	0.60993	0.292044	1
ENSMUSG00000064495	Gm24313	predicted gene, 24313	5.83977	3.03688	1.69432	0.760707	0.803007	1
ENSMUSG00000041046	Ramp3	receptor (calcitonin) activity modifying protein 3	177.727	108.279	1.63552	0.709748	0.148265	1
ENSMUSG00000020427	Igfbp3	insulin-like growth factor binding protein 3	2068.17	1647.9	1.25488	0.32755	0.52413	1
ENSMUSG00000020422	Tns3	tensin 3	4122.65	3748.72	1.09972	0.137139	0.688074	1
ENSMUSG00000046634	Pkd1l1	polycystic kidney disease 1 like 1	11.384	6.32097	1.69158	0.75837	0.563813	1
ENSMUSG00000020413	Hus1	HUS1 checkpoint clamp component	246.297	236.645	1.04062	0.0574379	0.832916	1
ENSMUSG00000020407	Upp1	uridine phosphorylase 1	502.124	175.549	2.84977	1.51084	0.128591	1
ENSMUSG00000004668	Abca13	ATP-binding cassette, sub-family A (ABC1), member 13	14202.4	11152.3	1.27347	0.34876	0.24287	1
ENSMUSG00000081629	Eif3s6-ps1	eukaryotic translation initiation factor 3, subunit 6, pseudogene 1	174.686	169.386	1.0311	0.0441887	0.938251	1
ENSMUSG00000050830	Vwc2	von Willebrand factor C domain containing 2	7.59422	0	8.59422	3.10337	0.130987	1
ENSMUSG00000020193	Zpbp	zona pellucida binding protein	14.5701	13.5533	1.06986	0.0974282	1	1
ENSMUSG00000081325	Gm12599	predicted gene 12599	32.7958	29.1195	1.12206	0.166146	0.826718	1
ENSMUSG00000035455	Fignl1	fidgetin-like 1	16.7228	15.8588	1.05125	0.0721075	0.921824	1
ENSMUSG00000020176	Grb10	growth factor receptor bound protein 10	922.85	715.518	1.28936	0.366655	0.299138	1
ENSMUSG00000086584	Gm12002	predicted gene 12002	45.9216	13.9132	3.14632	1.65367	0.0720756	1
ENSMUSG00000085452	4930554G24Rik	RIKEN cDNA 4930554G24 gene	4.18803	2.89059	1.33348	0.415198	0.906503	1
ENSMUSG00000081631	Gm12005	predicted gene 12005	10.9564	9.17792	1.17474	0.232339	0.915862	1
ENSMUSG00000084183	Gm12009	predicted gene 12009	136.082	119.548	1.13715	0.185423	0.640706	1
ENSMUSG00000048834	Vstm2a	V-set and transmembrane domain containing 2A	145.017	132.708	1.09206	0.127052	0.774292	1
ENSMUSG00000084347	Akt2-ps	thymoma viral proto-oncogene 2, pseudogene	397.222	392.322	1.01246	0.0178625	0.985866	1
ENSMUSG00000044629	Cnrip1	cannabinoid receptor interacting protein 1	53.0295	38.2418	1.37683	0.461356	0.763031	1
ENSMUSG00000082099	Gm12013	predicted gene 12013	9.99845	2.56437	3.08566	1.62558	0.309932	1
ENSMUSG00000078970	Wdr92	WD repeat domain 92	99.907	97.0425	1.02922	0.0415472	0.905807	1
ENSMUSG00000000581	C1d	C1D nuclear receptor co-repressor	242.135	206.233	1.17325	0.230505	0.55592	1
ENSMUSG00000086468	Etaa1os	Ewing tumor-associated antigen 1, opposite strand	4.24673	3.7566	1.10304	0.141489	0.975627	1
ENSMUSG00000085675	Gm12022	predicted gene 12022	7.57955	0	8.57955	3.1009	0.131395	1
ENSMUSG00000020160	Meis1	Meis homeobox 1	475.133	122.192	3.86497	1.95046	0.206879	1
ENSMUSG00000045671	Spred2	sprouty-related, EVH1 domain containing 2	812.139	740.678	1.09635	0.13271	0.716685	1
ENSMUSG00000020152	Actr2	ARP2 actin-related protein 2	2560.36	2285.17	1.12037	0.163981	0.62024	1
ENSMUSG00000020149	Rab1a	RAB1A, member RAS oncogene family	2620.31	2596.59	1.00913	0.013111	0.956652	1
ENSMUSG00000044066	Cep68	centrosomal protein 68	703.98	696.586	1.0106	0.015211	0.928212	1
ENSMUSG00000083878	Gm12034	predicted gene 12034	3.31814	1.8783	1.50024	0.585195	0.842514	1
ENSMUSG00000049800	Sertad2	SERTA domain containing 2	815.835	790.278	1.0323	0.0458588	0.915817	1
ENSMUSG00000083555	Gm12035	predicted gene 12035	11.5454	5.42132	1.95371	0.966217	0.717455	1
ENSMUSG00000084252	Gm12036	predicted gene 12036	12.5788	9.83036	1.25377	0.326273	0.88906	1
ENSMUSG00000042363	Lgalsl	lectin, galactoside binding-like	541.003	206.177	2.61614	1.38744	0.290261	1
ENSMUSG00000020134	Peli1	pellino 1	1118.83	784.136	1.42629	0.512265	0.105059	1
ENSMUSG00000084362	2610024D14Rik	RIKEN cDNA 2610024D14 gene	8.75965	6.93976	1.22921	0.297734	0.947558	1
ENSMUSG00000020128	Vps54	VPS54 GARP complex subunit	1424.69	1279.86	1.11308	0.154551	0.686815	1
ENSMUSG00000089555	Mir1933	microRNA 1933	3.7751	1.37215	2.01298	1.00933	0.681709	1
ENSMUSG00000087253	Gm12043	predicted gene 12043	3.8338	2.05823	1.58059	0.66046	0.775498	1
ENSMUSG00000042302	Ehbp1	EH domain binding protein 1	529.893	501.556	1.05639	0.0791386	0.789695	1
ENSMUSG00000049904	Tmem17	transmembrane protein 17	51.0949	32.2237	1.56801	0.648931	0.322486	1
ENSMUSG00000082576	Gm12058	predicted gene 12058	4.68901	2.02459	1.88092	0.91144	0.782512	1
ENSMUSG00000051355	Commd1	COMM domain containing 1	687.259	680.323	1.01018	0.0146118	0.975046	1
ENSMUSG00000044068	Zrsr1	zinc finger (CCCH type), RNA binding motif and serine/arginine rich 1	878.743	722.938	1.21522	0.281217	0.348013	1
ENSMUSG00000020290	Xpo1	exportin 1	1847.83	1761.01	1.04927	0.0693885	0.835848	1
ENSMUSG00000056342	Usp34	ubiquitin specific peptidase 34	3378.12	3309.36	1.02077	0.0296577	0.91194	1
ENSMUSG00000065591	Gm22753	predicted gene, 22753	5.83977	2.7443	1.82671	0.86925	0.623204	1
ENSMUSG00000020288	Ahsa2	AHA1, activator of heat shock protein ATPase 2	283.143	232.934	1.21463	0.280516	0.464902	1
ENSMUSG00000086459	1700030C12Rik	RIKEN cDNA 1700030C12 gene	5.86912	0.506147	4.56072	2.18926	0.358405	1
ENSMUSG00000020286	1700093K21Rik	RIKEN cDNA 1700093K21 gene	7.59422	0	8.59422	3.10337	0.130987	1
ENSMUSG00000042208	0610010F05Rik	RIKEN cDNA 0610010F05 gene	327.606	273.088	1.19891	0.26172	0.508511	1
ENSMUSG00000020283	Pex13	peroxisomal biogenesis factor 13	267.726	244.575	1.09427	0.12997	0.742347	1
ENSMUSG00000020273	Papolg	poly(A) polymerase gamma	191.66	184.345	1.03947	0.0558419	0.912967	1
ENSMUSG00000081811	Gm12713	predicted gene 12713	7.15194	4.08281	1.60382	0.681516	0.732924	1
ENSMUSG00000064090	Vrk2	vaccinia related kinase 2	143.867	91.1151	1.57267	0.653217	0.154026	1
ENSMUSG00000084064	Gm12079	predicted gene 12079	14.2012	13.2607	1.06595	0.092133	0.979187	1
ENSMUSG00000032889	Gm6685	predicted pseudogene 6685	73.1711	59.1503	1.2331	0.302285	0.645536	1
ENSMUSG00000032878	Ccdc85a	coiled-coil domain containing 85A	126.322	82.8149	1.51909	0.603206	0.459285	1
ENSMUSG00000020467	Efemp1	epidermal growth factor-containing fibulin-like extracellular matrix protein 1	267.833	241.673	1.1078	0.147697	0.690083	1
ENSMUSG00000086725	A630052C17Rik	RIKEN cDNA A630052C17 gene	44.1504	30.2781	1.44352	0.529589	0.485745	1
ENSMUSG00000032740	Ccdc88a	coiled coil domain containing 88A	1046.05	851.534	1.22816	0.296497	0.431672	1
ENSMUSG00000020458	Rtn4	reticulon 4	2812.79	1882.73	1.49373	0.578922	0.140318	1
ENSMUSG00000044072	Eml6	echinoderm microtubule associated protein like 6	403.288	248.68	1.61922	0.695303	0.194535	1
ENSMUSG00000078157	4931440F15Rik	RIKEN cDNA 4931440F15 gene	23.5792	14.1604	1.62128	0.697131	0.450161	1
ENSMUSG00000020315	Sptbn1	spectrin beta, non-erythrocytic 1	38593.7	30226.8	1.2768	0.352528	0.232482	1
ENSMUSG00000060923	Acyp2	acylphosphatase 2, muscle type	83.1088	73.8505	1.12369	0.168245	0.764952	1
ENSMUSG00000082078	Gm12098	predicted gene 12098	23.5792	13.8005	1.6607	0.731789	0.454144	1
ENSMUSG00000043999	Gpr75	G protein-coupled receptor 75	12.2832	4.55532	2.39108	1.25766	0.480656	1
ENSMUSG00000020305	Asb3	ankyrin repeat and SOCS box-containing 3	149.795	108.11	1.38204	0.466794	0.341327	1
ENSMUSG00000020279	Il9r	interleukin 9 receptor	6.62161	2.38445	2.25195	1.17118	0.557907	1
ENSMUSG00000020282	Rhbdf1	rhomboid 5 homolog 1	565.49	506.516	1.1162	0.158595	0.635442	1
ENSMUSG00000069917	Hba-a2	hemoglobin alpha, adult chain 2	234.159	195.128	1.19901	0.261842	0.778899	1
ENSMUSG00000040711	Sh3pxd2b	SH3 and PX domains 2B	780.769	485.072	1.60834	0.68557	0.236887	1
ENSMUSG00000044949	Ubtd2	ubiquitin domain containing 2	72.8756	43.2009	1.67136	0.741023	0.173848	1
ENSMUSG00000044056	Efcab9	EF-hand calcium binding domain 9	12.1658	7.69312	1.51451	0.598853	0.608118	1
ENSMUSG00000020271	Fbxw11	F-box and WD-40 domain protein 11	1067.93	1013.34	1.05382	0.0756335	0.813204	1
ENSMUSG00000081254	Gm12112	predicted gene 12112	62.2147	47.0818	1.31473	0.394769	0.566757	1
ENSMUSG00000081076	Rpsa-ps4	ribosomal protein S4, pseudogene 4	77.6254	76.8757	1.00963	0.0138218	0.902989	1
ENSMUSG00000057113	Npm1	nucleophosmin 1	428.129	421.835	1.01489	0.0213178	0.963983	1
ENSMUSG00000020159	Gabrp	gamma-aminobutyric acid (GABA) A receptor, pi	9.79096	1.01229	5.36252	2.42291	0.271033	1
ENSMUSG00000020155	Kcnmb1	potassium large conductance calcium-activated channel, subfamily M, beta member 1	388.423	38.5227	9.85314	3.30058	0.200989	1
ENSMUSG00000085684	4930469K13Rik	RIKEN cDNA 4930469K13 gene	11.2079	7.29962	1.4709	0.556698	0.738668	1
ENSMUSG00000002699	Lcp2	lymphocyte cytosolic protein 2	346.353	267.745	1.2925	0.370163	0.346076	1
ENSMUSG00000056427	Slit3	slit homolog 3 (Drosophila)	1853.58	375.204	4.92971	2.3015	0.191483	1
ENSMUSG00000086311	Gm12122	predicted gene 12122	25.5537	8.96435	2.66488	1.41407	0.516142	1
ENSMUSG00000018848	Rars	arginyl-tRNA synthetase	441.318	418.774	1.0537	0.0754688	0.780956	1
ENSMUSG00000082087	Gm12138	predicted gene 12138	170.972	104.714	1.62677	0.702007	0.136562	1
ENSMUSG00000020415	Pttg1	pituitary tumor-transforming gene 1	224.892	211.846	1.0613	0.0858267	0.877913	1
ENSMUSG00000020409	Slu7	SLU7 splicing factor homolog (S. cerevisiae)	1949.72	1816.97	1.07302	0.10168	0.73568	1
ENSMUSG00000046491	C1qtnf2	C1q and tumor necrosis factor related protein 2	57.7731	8.85171	5.96578	2.57671	0.149196	1
ENSMUSG00000045877	4933415A04Rik	RIKEN cDNA 4933415A04 gene	5.44151	1.51844	2.55774	1.35487	0.605512	1
ENSMUSG00000044950	Pwwp2a	PWWP domain containing 2A	490.962	428.494	1.14545	0.195911	0.605043	1
ENSMUSG00000050541	Adra1b	adrenergic receptor, alpha 1b	14.8636	8.96435	1.59203	0.670868	0.73381	1
ENSMUSG00000019189	Rnf145	ring finger protein 145	677.491	559.11	1.21135	0.27662	0.430464	1
ENSMUSG00000057098	Ebf1	early B cell factor 1	1344.75	466.668	2.87758	1.52486	0.195898	1
ENSMUSG00000085784	Gm12158	predicted gene 12158	74.4372	31.8302	2.2978	1.20026	0.133837	1
ENSMUSG00000011254	Thg1l	tRNA-histidine guanylyltransferase 1-like (S. cerevisiae)	77.7721	67.1024	1.15667	0.209979	0.775634	1
ENSMUSG00000040489	Sox30	SRY (sex determining region Y)-box 30	9.30465	0	10.3047	3.36522	0.0778601	1
ENSMUSG00000011256	Adam19	a disintegrin and metallopeptidase domain 19 (meltrin beta)	336.21	228.829	1.46722	0.553086	0.265124	1
ENSMUSG00000082530	Gm12168	predicted gene 12168	80.5452	48.7348	1.6396	0.713344	0.200864	1
ENSMUSG00000020399	Havcr2	hepatitis A virus cellular receptor 2	243.032	172.581	1.40586	0.491457	0.64782	1
ENSMUSG00000080776	Gm12174	predicted gene 12174	1271.82	1176.41	1.08104	0.112414	0.818144	1
ENSMUSG00000020354	Sgcd	sarcoglycan, delta (dystrophin-associated glycoprotein)	42.9703	21.7526	1.93254	0.9505	0.247943	1
ENSMUSG00000081952	Gm12178	predicted gene 12178	20.1877	13.9132	1.42074	0.506638	0.697494	1
ENSMUSG00000082454	Gm12183	predicted gene 12183	5320.8	4369.73	1.2176	0.284041	0.361587	1
ENSMUSG00000078154	Gm12184	predicted gene 12184	125.905	105.771	1.18857	0.249225	0.695069	1
ENSMUSG00000046879	Irgm1	immunity-related GTPase family M member 1	3304.51	1009.99	3.26957	1.7091	0.341498	1
ENSMUSG00000058163	Gm5431	predicted gene 5431	109.74	49.5789	2.18945	1.13057	0.0653109	1
ENSMUSG00000048852	Gm12185	predicted gene 12185	451.797	56.3388	7.89687	2.98128	0.263116	1
ENSMUSG00000078153	Psme2b	protease (prosome, macropain) activator subunit 2B	792.126	452.136	1.7503	0.807605	0.15729	1
ENSMUSG00000069893	9930111J21Rik1	RIKEN cDNA 9930111J21 gene 1	491.971	243.845	2.0134	1.00963	0.125545	1
ENSMUSG00000040328	Olfr56	olfactory receptor 56	20.8207	3.39674	4.96293	2.31119	0.195092	1
ENSMUSG00000078922	Tgtp1	T cell specific GTPase 1	596.052	87.0659	6.7796	2.7612	0.253146	1
ENSMUSG00000078921	Tgtp2	T cell specific GTPase 2	2849.43	524.354	5.42573	2.43982	0.275008	1
ENSMUSG00000078920	Ifi47	interferon gamma inducible protein 47	403.316	92.5326	4.32273	2.11194	0.323435	1
ENSMUSG00000082116	Gm12188	predicted gene 12188	11.5454	5.06147	2.0697	1.04942	0.747644	1
ENSMUSG00000040283	Btnl9	butyrophilin-like 9	628.926	321.025	1.95614	0.968007	0.283754	1
ENSMUSG00000083061	Gm12191	predicted gene 12191	409.937	394.459	1.03914	0.0553886	0.909256	1
ENSMUSG00000081570	Gm12192	predicted gene 12192	11.0298	6.43362	1.61829	0.694471	0.719495	1
ENSMUSG00000020374	Rasgef1c	RasGEF domain family, member 1C	5.45618	5.42132	1.00543	0.0078105	1	1
ENSMUSG00000020376	Rnf130	ring finger protein 130	1035.18	917.261	1.12842	0.174298	0.576925	1
ENSMUSG00000036644	Tbc1d9b	TBC1 domain family, member 9B	1882.78	1660.41	1.13384	0.181222	0.573619	1
ENSMUSG00000015837	Sqstm1	sequestosome 1	6261.27	5019.32	1.24738	0.318905	0.259205	1
ENSMUSG00000036620	Mgat4b	mannoside acetylglucosaminyltransferase 4, isoenzyme B	935.464	922.299	1.01426	0.020425	0.91683	1
ENSMUSG00000050567	Maml1	mastermind like 1 (Drosophila)	712.184	588.857	1.20908	0.273909	0.363865	1
ENSMUSG00000007850	Hnrnph1	heterogeneous nuclear ribonucleoprotein H1	4057.52	3928.72	1.03278	0.0465287	0.842538	1
ENSMUSG00000085902	Gm12200	predicted gene 12200	3.81912	2.02459	1.59332	0.672033	0.88622	1
ENSMUSG00000044807	Zfp354c	zinc finger protein 354C	143.953	119.099	1.20694	0.271353	0.621196	1
ENSMUSG00000044296	Zfp879	zinc finger protein 879	20.261	17.996	1.11924	0.162518	0.947625	1
ENSMUSG00000049321	Zfp2	zinc finger protein 2	83.7607	67.7548	1.2328	0.301934	0.656228	1
ENSMUSG00000020335	Zfp354b	zinc finger protein 354B	33.3408	28.2871	1.17256	0.229657	0.750166	1
ENSMUSG00000063564	Col23a1	collagen, type XXIII, alpha 1	118.085	108.785	1.08471	0.117308	0.850473	1
ENSMUSG00000020358	Hnrnpab	heterogeneous nuclear ribonucleoprotein A/B	3166.15	2965.16	1.06776	0.0945875	0.770923	1
ENSMUSG00000001054	Rmnd5b	required for meiotic nuclear division 5 homolog B	265.068	263.099	1.00745	0.0107148	0.952774	1
ENSMUSG00000001053	N4bp3	NEDD4 binding protein 3	363.217	289.643	1.25314	0.32555	0.340457	1
ENSMUSG00000020387	Jade2	jade family PHD finger 2	1590.53	1161.59	1.36895	0.453068	0.159306	1
ENSMUSG00000020392	Cdkn2aipnl	CDKN2A interacting protein N-terminal like	251.028	240.459	1.04377	0.0618088	0.897173	1
ENSMUSG00000020389	Cdkl3	cyclin-dependent kinase-like 3	53.6459	47.4081	1.12886	0.174865	0.849921	1
ENSMUSG00000020349	Ppp2ca	protein phosphatase 2 (formerly 2A), catalytic subunit, alpha isoform	2688.29	2608.36	1.03063	0.0435326	0.888229	1
ENSMUSG00000062204	Olfr1373	olfactory receptor 1373	8.10987	0	9.10987	3.18743	0.231483	1
ENSMUSG00000000782	Tcf7	transcription factor 7, T cell specific	140.897	140.662	1.00166	0.00238901	0.900029	1
ENSMUSG00000086395	A630014C17Rik	RIKEN cDNA A630014C17 gene	11.4867	0	12.4867	3.64232	0.0905879	1
ENSMUSG00000018239	Zcchc10	zinc finger, CCHC domain containing 10	93.2121	77.5281	1.19972	0.262703	0.565974	1
ENSMUSG00000049470	Aff4	AF4/FMR2 family, member 4	4977.31	4416.83	1.12687	0.172317	0.570392	1
ENSMUSG00000036216	Leap2	liver-expressed antimicrobial peptide 2	14.8049	7.69312	1.81809	0.862421	0.452507	1
ENSMUSG00000018238	Gdf9	growth differentiation factor 9	15.1591	8.19927	1.75656	0.812755	0.476439	1
ENSMUSG00000018398	Sept8	septin 8	999.836	586.059	1.70483	0.769629	0.19162	1
ENSMUSG00000018395	Kif3a	kinesin family member 3A	526.707	522.891	1.00728	0.0104702	0.916341	1
ENSMUSG00000018899	Irf1	interferon regulatory factor 1	6461.09	2765.24	2.33606	1.22408	0.335484	1
ENSMUSG00000091191	Gm17334	predicted gene, 17334	153.415	86.886	1.75699	0.813105	0.389232	1
ENSMUSG00000081769	Gm12216	predicted gene 12216	179.912	84.8614	2.10702	1.0752	0.355857	1
ENSMUSG00000020388	Pdlim4	PDZ and LIM domain 4	57.467	23.7772	2.35971	1.23861	0.0981576	1
ENSMUSG00000018906	P4ha2	procollagen-proline, 2-oxoglutarate 4-dioxygenase (proline 4-hydroxylase), alpha II polypeptide	383.417	287.879	1.33072	0.412208	0.302891	1
ENSMUSG00000020333	Acsl6	acyl-CoA synthetase long-chain family member 6	16.8989	5.6349	2.69769	1.43172	0.242395	1
ENSMUSG00000078151	Gm12226	predicted pseudogene 12226	78.0362	58.8241	1.32114	0.401787	0.518931	1
ENSMUSG00000037533	Rapgef6	Rap guanine nucleotide exchange factor (GEF) 6	1531	1249.13	1.22547	0.293341	0.374608	1
ENSMUSG00000086039	Gm12227	predicted gene 12227	23.816	10.1902	2.21765	1.14903	0.297397	1
ENSMUSG00000082503	Gm12229	predicted gene 12229	21.5439	9.53778	2.13934	1.09716	0.314497	1
ENSMUSG00000020268	Lyrm7	LYR motif containing 7	50.5646	33.5622	1.49194	0.577186	0.387607	1
ENSMUSG00000020400	Tnip1	TNFAIP3 interacting protein 1	1334.21	993.182	1.34303	0.42549	0.182409	1
ENSMUSG00000082180	Gm12230	predicted gene 12230	17.49	14.5202	1.19134	0.252591	0.747467	1
ENSMUSG00000018340	Anxa6	annexin A6	1638.36	1364.47	1.20058	0.263731	0.408015	1
ENSMUSG00000049588	Ccdc69	coiled-coil domain containing 69	64.4408	29.2658	2.16221	1.1125	0.101493	1
ENSMUSG00000020522	Mfap3	microfibrillar-associated protein 3	465.245	458.276	1.01517	0.0217275	0.931054	1
ENSMUSG00000020520	Galnt10	UDP-N-acetyl-alpha-D-galactosamine:polypeptide N-acetylgalactosaminyltransferase 10	399.354	333.543	1.19672	0.259084	0.517665	1
ENSMUSG00000020519	Sap30l	SAP30-like	412.129	403.254	1.02196	0.0313333	0.920118	1
ENSMUSG00000086962	Gm12248	predicted gene 12248	13.8469	8.19927	1.61392	0.690573	0.549993	1
ENSMUSG00000020514	Mrpl22	mitochondrial ribosomal protein L22	107.193	105.546	1.01546	0.0221308	1	1
ENSMUSG00000082292	Gm12250	predicted gene 12250	532.709	126.184	4.19635	2.06914	0.276058	1
ENSMUSG00000078853	Igtp	interferon gamma induced GTPase	2118.53	329.346	6.41609	2.68169	0.300391	1
ENSMUSG00000069874	Irgm2	immunity-related GTPase family M member 2	1792.71	590.297	3.03352	1.60099	0.412031	1
ENSMUSG00000085342	Gm12254	predicted gene 12254	315.423	311.161	1.01365	0.019563	0.946264	1
ENSMUSG00000037001	Zfp39	zinc finger protein 39	146.3	143.899	1.01657	0.0237119	0.903611	1
ENSMUSG00000036964	Trim17	tripartite motif-containing 17	26.1448	23.8445	1.09259	0.127754	0.881083	1
ENSMUSG00000085379	2310058D17Rik	RIKEN cDNA 2310058D17 gene	32.561	27.0613	1.19599	0.258206	0.748195	1
ENSMUSG00000061462	Obscn	obscurin, cytoskeletal calmodulin and titin-interacting RhoGEF	77.7888	41.8741	1.83768	0.877885	0.143451	1
ENSMUSG00000072902	Gm10435	predicted gene 10435	3.78977	1.37215	2.01917	1.01376	0.680949	1
ENSMUSG00000020441	2310033P09Rik	RIKEN cDNA 2310033P09 gene	330.555	285.089	1.15892	0.212784	0.607566	1
ENSMUSG00000048076	Arf1	ADP-ribosylation factor 1	2657.89	2345.78	1.133	0.180147	0.563522	1
ENSMUSG00000054519	Zfp867	zinc finger protein 867	105.525	92.0601	1.14469	0.194953	0.696307	1
ENSMUSG00000072893	4933439C10Rik	RIKEN cDNA 4933439C10 gene	58.8232	57.0131	1.0312	0.0443267	0.941428	1
ENSMUSG00000081262	Gm12261	predicted gene 12261	16.8402	11.596	1.41634	0.502163	0.638808	1
ENSMUSG00000005417	Mprip	myosin phosphatase Rho interacting protein	6287.37	5295.83	1.1872	0.247558	0.511632	1
ENSMUSG00000086330	1700007J10Rik	RIKEN cDNA 1700007J10 gene	44.3999	35.0806	1.25829	0.331466	0.634482	1
ENSMUSG00000086536	Gm12264	predicted gene 12264	10.5728	6.43362	1.55682	0.638602	0.752324	1
ENSMUSG00000043648	Pld6	phospholipase D family, member 6	30.7898	9.89764	2.91713	1.54455	0.100948	1
ENSMUSG00000087249	Gm16062	predicted gene 16062	4.27608	2.05823	1.72521	0.78677	0.72109	1
ENSMUSG00000085260	Med9os	mediator complex subunit 9, opposite strand	7.18129	1.37215	3.44889	1.78613	0.345744	1
ENSMUSG00000061650	Med9	mediator complex subunit 9	241.663	193.984	1.24453	0.315597	0.425226	1
ENSMUSG00000049892	Rasd1	RAS, dexamethasone-induced 1	744.289	543.307	1.36924	0.453379	0.638601	1
ENSMUSG00000062115	Rai1	retinoic acid induced 1	1050.36	985.287	1.06598	0.0921814	0.801065	1
ENSMUSG00000051008	4930412M03Rik	RIKEN cDNA 4930412M03 gene	39.9771	32.4826	1.22383	0.291406	0.72158	1
ENSMUSG00000018415	Gid4	GID complex subunit 4, VID24 homolog	487.734	392.67	1.24148	0.312064	0.371088	1
ENSMUSG00000020536	Llgl1	lethal giant larvae homolog 1 (Drosophila)	301.889	271.975	1.10959	0.15002	0.738232	1
ENSMUSG00000002812	Flii	flightless I actin binding protein	2363.78	1925.9	1.22725	0.295424	0.360095	1
ENSMUSG00000002814	Top3a	topoisomerase (DNA) III alpha	182.53	140.649	1.29567	0.373696	0.361061	1
ENSMUSG00000043284	Tmem11	transmembrane protein 11	272.75	265.023	1.02905	0.0413098	0.918222	1
ENSMUSG00000042549	Map2k3os	mitogen-activated protein kinase kinase 3, opposite strand	47.2024	31.6166	1.47785	0.563499	0.464766	1
ENSMUSG00000018932	Map2k3	mitogen-activated protein kinase kinase 3	728.859	572.459	1.27273	0.347928	0.263616	1
ENSMUSG00000010142	Tnfrsf13b	tumor necrosis factor receptor superfamily, member 13b	59.7686	48.8138	1.21991	0.286778	0.659867	1
ENSMUSG00000042506	Usp22	ubiquitin specific peptidase 22	1258.01	1241.32	1.01343	0.0192528	0.950057	1
ENSMUSG00000001034	Mapk7	mitogen-activated protein kinase 7	210.137	199.676	1.05213	0.0733134	0.918476	1
ENSMUSG00000001039	B9d1	B9 protein domain 1	89.5083	83.7818	1.06754	0.094295	0.833133	1
ENSMUSG00000001036	Epn2	epsin 2	1152.1	660.821	1.74231	0.801	0.0757214	1
ENSMUSG00000085459	Gm12272	predicted gene 12272	12.6521	8.19927	1.48405	0.569536	0.630046	1
ENSMUSG00000004837	Grap	GRB2-related adaptor protein	200.183	184.278	1.08584	0.118816	0.814903	1
ENSMUSG00000042371	Slc5a10	solute carrier family 5 (sodium/glucose cotransporter), member 10	627.242	567.099	1.10587	0.145179	0.936172	1
ENSMUSG00000004798	Ulk2	unc-51 like kinase 2	907.07	841.319	1.07806	0.108438	0.74703	1
ENSMUSG00000072847	A530017D24Rik	RIKEN cDNA A530017D24 gene	148.996	114.611	1.29742	0.37564	0.438069	1
ENSMUSG00000047804	Akap10	A kinase (PRKA) anchor protein 10	843.071	790.255	1.06675	0.0932223	0.762101	1
ENSMUSG00000042331	Specc1	sperm antigen with calponin homology and coiled-coil domains 1	1867.6	1641.25	1.13783	0.18629	0.543626	1
ENSMUSG00000018500	Adora2b	adenosine A2b receptor	45.2845	30.2108	1.48296	0.568483	0.551348	1
ENSMUSG00000086310	Gm12278	predicted gene 12278	3.84847	3.39674	1.10274	0.141096	1	1
ENSMUSG00000087120	Gm12279	predicted gene 12279	3.76043	2.71066	1.2829	0.359414	0.96405	1
ENSMUSG00000019505	Ubb	ubiquitin B	8931.51	8424.36	1.06019	0.0843269	0.788805	1
ENSMUSG00000085748	Gm12280	predicted gene 12280	12.3273	8.91899	1.34361	0.426115	0.732658	1
ENSMUSG00000065734	Snord49a	small nucleolar RNA, C/D box 49A	11.472	7.83941	1.41096	0.496675	0.724767	1
ENSMUSG00000077457	Snord65	small nucleolar RNA, C/D box 65	3.84847	2.02459	1.60302	0.680792	0.885281	1
ENSMUSG00000046417	Lrrc75a	leucine rich repeat containing 75A	84.1087	80.1379	1.04894	0.068932	0.958442	1
ENSMUSG00000085170	Lrrc75aos1	leucine rich repeat containing 75A, opposite strand 1	12.1658	4.11646	2.57323	1.36358	0.302269	1
ENSMUSG00000047821	Trim16	tripartite motif-containing 16	304.7	215.232	1.41376	0.499534	0.328747	1
ENSMUSG00000014177	Tvp23b	trans-golgi network vesicle protein 23B	431.638	318.639	1.35352	0.436715	0.227273	1
ENSMUSG00000086677	Tvp23bos	trans-golgi network vesicle protein 23B, opposite strand	4.18803	1.8783	1.80247	0.849971	0.732078	1
ENSMUSG00000081455	Hmgb1-ps3	high mobility group box 1, pseudogene 3	3.81912	3.7566	1.01314	0.0188404	1	1
ENSMUSG00000086359	9630013K17Rik	RIKEN cDNA 9630013K17 gene	12.0925	11.3824	1.05734	0.0804419	1	1
ENSMUSG00000084884	Gm12289	predicted gene 12289	9.99845	2.53073	3.11506	1.63926	0.387585	1
ENSMUSG00000087497	2810001G20Rik	RIKEN cDNA 2810001G20 gene	58.3202	21.1792	2.67459	1.41932	0.11954	1
ENSMUSG00000047759	Hs3st3a1	heparan sulfate (glucosamine) 3-O-sulfotransferase 3A1	51.0529	43.5388	1.16871	0.224916	0.752451	1
ENSMUSG00000020549	Elac2	elaC ribonuclease Z 2	435.038	384.302	1.13168	0.178462	0.634595	1
ENSMUSG00000033389	Arhgap44	Rho GTPase activating protein 44	372.513	236.995	1.56942	0.650228	0.255676	1
ENSMUSG00000083935	Gm12294	predicted gene 12294	6.2527	4.58896	1.29768	0.375938	0.885171	1
ENSMUSG00000020548	1700086D15Rik	RIKEN cDNA 1700086D15 gene	30.9659	13.1817	2.25402	1.1725	0.334985	1
ENSMUSG00000020542	Myocd	myocardin	514.14	62.2882	8.13959	3.02496	0.256076	1
ENSMUSG00000085162	Gm12295	predicted gene 12295	5.13129	0	6.13129	2.61619	0.35882	1
ENSMUSG00000056752	Dnah9	dynein, axonemal, heavy chain 9	5.89846	5.30868	1.09349	0.128937	0.91463	1
ENSMUSG00000050270	Tmem220	transmembrane protein 220	87.5651	70.859	1.23248	0.30157	0.626527	1
ENSMUSG00000069844	Sco1	SCO1 cytochrome c oxidase assembly protein	215.168	212.7	1.01155	0.0165675	0.947525	1
ENSMUSG00000033066	Gas7	growth arrest specific 7	662.847	452.609	1.46348	0.549403	0.211894	1
ENSMUSG00000087058	Gm12301	predicted gene 12301	8.83302	8.19927	1.06889	0.0961154	0.928437	1
ENSMUSG00000049928	Glp2r	glucagon-like peptide 2 receptor	13.4927	9.21156	1.41924	0.505121	0.672792	1
ENSMUSG00000020902	Ntn1	netrin 1	935.527	632.994	1.47719	0.562851	0.0916104	1
ENSMUSG00000084993	Gm12305	predicted gene 12305	10.0571	8.16563	1.20637	0.270674	0.882477	1
ENSMUSG00000046207	Pik3r6	phosphoinositide-3-kinase, regulatory subunit 6	161.828	142.55	1.13429	0.181795	0.743596	1
ENSMUSG00000048329	Mfsd6l	major facilitator superfamily domain containing 6-like	60.9592	46.2831	1.31039	0.389994	0.603609	1
ENSMUSG00000020900	Myh10	myosin, heavy polypeptide 10, non-muscle	3249.44	3063.93	1.06053	0.0847838	0.789234	1
ENSMUSG00000052921	Arhgef15	Rho guanine nucleotide exchange factor (GEF) 15	1336.49	872.578	1.53105	0.614522	0.0704222	1
ENSMUSG00000072809	9330160F10Rik	RIKEN cDNA 9330160F10 gene	30.7165	30.6716	1.00142	0.00204282	0.974872	1
ENSMUSG00000045176	Borcs6	BLOC-1 related complex subunit 6	76.1497	56.0798	1.35161	0.43468	0.498293	1
ENSMUSG00000020895	Tmem107	transmembrane protein 107	32.3388	32.0101	1.00996	0.014297	0.98161	1
ENSMUSG00000023781	Hes7	hairy and enhancer of split 7 (Drosophila)	8.12455	2.05823	2.98361	1.57706	0.514193	1
ENSMUSG00000020892	Aloxe3	arachidonate lipoxygenase 3	5.88379	2.20452	2.14815	1.1031	0.641144	1
ENSMUSG00000020891	Alox8	arachidonate 8-lipoxygenase	17.5319	1.51844	7.35849	2.87941	0.394082	1
ENSMUSG00000049299	Trappc1	trafficking protein particle complex 1	138.765	121.877	1.13743	0.185782	0.727453	1
ENSMUSG00000043419	Chd3os	chromodomain helicase DNA binding protein 3, opposite strand	22.9902	13.9468	1.60504	0.682605	0.511607	1
ENSMUSG00000045377	Tmem88	transmembrane protein 88	124.65	85.0647	1.45994	0.545912	0.329862	1
ENSMUSG00000018476	Kdm6b	KDM1 lysine (K)-specific demethylase 6B	4376.78	3473.17	1.26009	0.333531	0.553799	1
ENSMUSG00000085178	Kdm6bos	KDM1 lysine (K)-specific demethylase 6B, opposite strand	24.7886	20.2678	1.21257	0.278066	0.755252	1
ENSMUSG00000005237	Dnah2	dynein, axonemal, heavy chain 2	83.7293	75.1437	1.11276	0.154136	0.722464	1
ENSMUSG00000086591	Dnah2os	dynein, axonemal, heavy chain 2, opposite strand	14.0817	7.95206	1.68472	0.752509	0.771936	1
ENSMUSG00000003934	Efnb3	ephrin B3	5.92781	4.80253	1.19393	0.255717	0.842614	1
ENSMUSG00000059552	Trp53	transformation related protein 53	238.137	207.909	1.1447	0.194965	0.669207	1
ENSMUSG00000041329	Atp1b2	ATPase, Na+/K+ transporting, beta 2 polypeptide	1339.69	284.178	4.70125	2.23305	0.303219	1
ENSMUSG00000088752	Mir1934	microRNA 1934	3.80445	3.03688	1.19014	0.25113	1	1
ENSMUSG00000018774	Cd68	CD68 antigen	661.369	456.816	1.4468	0.532868	0.526236	1
ENSMUSG00000005204	Senp3	SUMO/sentrin specific peptidase 3	514.87	511.927	1.00574	0.00825426	0.986998	1
ENSMUSG00000085890	Tnfsf13os	tumor necrosis factor (ligand) superfamily, member 13, opposite strand	11.7529	11.3824	1.02992	0.0425308	1	1
ENSMUSG00000018752	Tnfsfm13	tumor necrosis factor (ligand) superfamily, membrane-bound member 13	198.691	152.571	1.30032	0.378862	0.344276	1
ENSMUSG00000089669	Tnfsf13	tumor necrosis factor (ligand) superfamily, member 13	6.29672	5.27504	1.16282	0.217625	0.946403	1
ENSMUSG00000005198	Polr2a	polymerase (RNA) II (DNA directed) polypeptide A	4391.66	3953.32	1.11085	0.151664	0.60316	1
ENSMUSG00000018776	Slc35g3	solute carrier family 35, member G3	13.5367	5.99476	2.07823	1.05536	0.380671	1
ENSMUSG00000018750	Zbtb4	zinc finger and BTB domain containing 4	1679.32	1182.78	1.41945	0.505334	0.130301	1
ENSMUSG00000041189	Chrnb1	cholinergic receptor, nicotinic, beta polypeptide 1 (muscle)	146.059	106.918	1.36269	0.446459	0.382525	1
ENSMUSG00000042826	Fgf11	fibroblast growth factor 11	77.1076	64.4254	1.19384	0.255613	0.696131	1
ENSMUSG00000089876	Tmem102	transmembrane protein 102	86.3263	85.6382	1.00794	0.0114136	0.983632	1
ENSMUSG00000041165	Spem1	sperm maturation 1	5.95716	1.01229	3.45733	1.78966	0.463637	1
ENSMUSG00000051790	Nlgn2	neuroligin 2	252.483	152.201	1.65458	0.726466	0.099477	1
ENSMUSG00000018570	2810408A11Rik	RIKEN cDNA 2810408A11 gene	24.4344	9.35785	2.45557	1.29606	0.226101	1
ENSMUSG00000018565	Elp5	elongator acetyltransferase complex subunit 5	253.37	240.065	1.05519	0.077503	0.885182	1
ENSMUSG00000018567	Gabarap	gamma-aminobutyric acid receptor associated protein	1535.82	1498.69	1.02476	0.0352884	0.908293	1
ENSMUSG00000018572	Phf23	PHD finger protein 23	507.608	477.34	1.06328	0.0885174	0.757767	1
ENSMUSG00000020886	Dlg4	discs, large homolog 4 (Drosophila)	219.979	140.221	1.56477	0.645949	0.368818	1
ENSMUSG00000040963	Asgr2	asialoglycoprotein receptor 2	10.795	9.29057	1.14619	0.19685	1	1
ENSMUSG00000000317	Bcl6b	B cell CLL/lymphoma 6, member B	600.025	304.884	1.96488	0.97444	0.193853	1
ENSMUSG00000020831	0610010K14Rik	RIKEN cDNA 0610010K14 gene	14.7462	7.5922	1.83261	0.873901	0.618639	1
ENSMUSG00000000320	Alox12	arachidonate 12-lipoxygenase	341.497	167.362	2.03429	1.02453	0.305082	1
ENSMUSG00000018920	Cxcl16	chemokine (C-X-C motif) ligand 16	2264.87	1906.74	1.18773	0.248201	0.413532	1
ENSMUSG00000040829	Zmynd15	zinc finger, MYND-type containing 15	421.937	399.193	1.05683	0.0797474	0.858055	1
ENSMUSG00000020828	Pld2	phospholipase D2	377.806	301.24	1.25333	0.325761	0.402285	1
ENSMUSG00000014609	Chrne	cholinergic receptor, nicotinic, epsilon polypeptide	16.0143	9.03163	1.69607	0.762192	0.521873	1
ENSMUSG00000087279	4930544D05Rik	RIKEN cDNA 4930544D05 gene	5.0726	1.37215	2.55995	1.35612	0.531792	1
ENSMUSG00000085952	Gm12315	predicted gene 12315	5.10195	4.44267	1.12113	0.164954	0.944425	1
ENSMUSG00000050675	Gp1ba	glycoprotein 1b, alpha polypeptide	76.5459	40.0631	1.88846	0.917209	0.219822	1
ENSMUSG00000018293	Pfn1	profilin 1	1873.03	1565.98	1.19595	0.25816	0.411332	1
ENSMUSG00000060600	Eno3	enolase 3, beta muscle	88.1668	84.7941	1.03931	0.0556275	0.894415	1
ENSMUSG00000040712	Camta2	calmodulin binding transcription activator 2	1122.44	1027.9	1.09188	0.126814	0.700837	1
ENSMUSG00000020817	Rabep1	rabaptin, RAB GTPase binding effector protein 1	1917.86	1831.7	1.04701	0.0662752	0.844101	1
ENSMUSG00000081968	Rpl23a-ps2	ribosomal protein L23A, pseudogene 2	5.89846	4.44267	1.26748	0.34196	0.851024	1
ENSMUSG00000040599	Mis12	MIS12 kinetochore complex component	242.665	239.548	1.01296	0.0185768	0.962314	1
ENSMUSG00000069830	Nlrp1a	NLR family, pyrin domain containing 1A	35.7304	32.0891	1.11004	0.150617	0.922634	1
ENSMUSG00000020811	Wscd1	WSC domain containing 1	334.211	298.202	1.12035	0.163948	0.598677	1
ENSMUSG00000020808	Fam64a	family with sequence similarity 64, member A	15.44	9.65043	1.5436	0.626296	0.694005	1
ENSMUSG00000040543	Pitpnm3	PITPNM family member 3	415.699	229.312	1.80928	0.855418	0.304049	1
ENSMUSG00000020807	4933427D14Rik	RIKEN cDNA 4933427D14 gene	320.408	268.42	1.19296	0.254549	0.507318	1
ENSMUSG00000053574	4930563E22Rik	RIKEN cDNA 4930563E22 gene	20.2023	10.2575	1.8834	0.913337	0.353927	1
ENSMUSG00000040483	Xaf1	XIAP associated factor 1	522.251	233.891	2.22764	1.15551	0.252135	1
ENSMUSG00000070388	Fbxo39	F-box protein 39	4.70369	4.44267	1.04796	0.067579	0.994328	1
ENSMUSG00000020798	Spns3	spinster homolog 3	67.1133	53.3121	1.25411	0.326664	0.662028	1
ENSMUSG00000020790	Ankfy1	ankyrin repeat and FYVE domain containing 1	1719.1	1496.48	1.14866	0.199949	0.56189	1
ENSMUSG00000084329	Gm6733	predicted gene 6733	385.97	345.982	1.11525	0.157363	0.643	1
ENSMUSG00000065298	Gm26121	predicted gene, 26121	4.17336	3.39674	1.17664	0.234668	0.98389	1
ENSMUSG00000020788	Atp2a3	ATPase, Ca++ transporting, ubiquitous	2628.1	1034.11	2.53993	1.34479	0.214902	1
ENSMUSG00000020787	P2rx1	purinergic receptor P2X, ligand-gated ion channel, 1	660.476	90.3954	7.23752	2.8555	0.225861	1
ENSMUSG00000086943	4732414G09Rik	RIKEN cDNA 4732414G09 gene	11.5161	4.76889	2.16958	1.11741	0.557736	1
ENSMUSG00000020785	Camkk1	calcium/calmodulin-dependent protein kinase kinase 1, alpha	65.6482	38.2184	1.69941	0.765035	0.387115	1
ENSMUSG00000020783	Ncbp3	nuclear cap binding subunit 3	488.608	471.267	1.03672	0.0520237	0.896494	1
ENSMUSG00000040158	Tax1bp3	Tax1 (human T cell leukemia virus type I) binding protein 3	84.7019	84.367	1.00392	0.005649	1	1
ENSMUSG00000020745	Pafah1b1	platelet-activating factor acetylhydrolase, isoform 1b, subunit 1	2025	1773.89	1.14148	0.190905	0.550557	1
ENSMUSG00000000282	Mnt	max binding protein	695.453	621.442	1.1189	0.162086	0.607283	1
ENSMUSG00000077493	Snord91a	small nucleolar RNA, C/D box 91A	3.74575	1.8783	1.6488	0.72142	0.786115	1
ENSMUSG00000077637	Gm22771	predicted gene, 22771	6.3114	4.08281	1.43845	0.52452	0.815441	1
ENSMUSG00000085765	Gm12333	predicted gene 12333	11.428	9.53778	1.17938	0.238025	0.877234	1
ENSMUSG00000082481	Rps12-ps19	ribosomal protein S12, pseudogene 19	7.50618	4.76889	1.47449	0.560217	0.758294	1
ENSMUSG00000065590	Mir212	microRNA 212	4.67434	4.04917	1.12382	0.168405	1	1
ENSMUSG00000038268	Ovca2	candidate tumor suppressor in ovarian cancer 2	101.335	76.6621	1.31769	0.398011	0.417079	1
ENSMUSG00000078789	Dph1	diphthamide biosynthesis 1	77.2418	75.2563	1.02604	0.0370823	0.92036	1
ENSMUSG00000045287	Rtn4rl1	reticulon 4 receptor-like 1	326.004	252.033	1.29234	0.369985	0.510338	1
ENSMUSG00000000751	Rpa1	replication protein A1	596.227	531.295	1.12198	0.166052	0.659807	1
ENSMUSG00000000753	Serpinf1	serine (or cysteine) peptidase inhibitor, clade F, member 1	247.88	115.207	2.1417	1.09876	0.165679	1
ENSMUSG00000085148	Mir22hg	Mir22 host gene (non-protein coding)	228.594	207.221	1.10264	0.140965	0.682898	1
ENSMUSG00000038217	Tlcd2	TLC domain containing 2	75.7368	65.6849	1.15074	0.202558	0.723186	1
ENSMUSG00000020850	Prpf8	pre-mRNA processing factor 8	5624.62	5538.18	1.01561	0.0223407	0.966377	1
ENSMUSG00000038188	Scarf1	scavenger receptor class F, member 1	321.986	218.313	1.47272	0.558482	0.159593	1
ENSMUSG00000017781	Pitpna	phosphatidylinositol transfer protein, alpha	1640.37	1383.72	1.18535	0.24531	0.495613	1
ENSMUSG00000085088	4931413K12Rik	RIKEN cDNA 4931413K12 gene	70.1192	66.6416	1.05141	0.0723276	0.988076	1
ENSMUSG00000006127	Inpp5k	inositol polyphosphate 5-phosphatase K	755.525	626.695	1.20524	0.269324	0.418498	1
ENSMUSG00000017774	Myo1c	myosin IC	4900.96	3974.2	1.23313	0.30233	0.330356	1
ENSMUSG00000017776	Crk	v-crk avian sarcoma virus CT10 oncogene homolog	1808.9	1476.8	1.22473	0.292462	0.331599	1
ENSMUSG00000087059	Gm12339	predicted gene 12339	4.70369	1.51844	2.26477	1.17936	0.693307	1
ENSMUSG00000020847	Rph3al	rabphilin 3A-like (without C2 domains)	209.37	159.894	1.30751	0.386821	0.40143	1
ENSMUSG00000020846	Rflnb	refilin B	612.119	343.745	1.77847	0.830639	0.0925853	1
ENSMUSG00000017286	Glod4	glyoxalase domain containing 4	932.85	860.394	1.08411	0.116517	0.714335	1
ENSMUSG00000069808	Fam57a	family with sequence similarity 57, member A	81.8888	67.6422	1.20755	0.272082	0.661576	1
ENSMUSG00000038057	Dbil5	diazepam binding inhibitor-like 5	6.39944	1.69837	2.74219	1.45533	0.510715	1
ENSMUSG00000020844	Nxn	nucleoredoxin	344.098	192.691	1.78169	0.83325	0.126212	1
ENSMUSG00000017631	Abr	active BCR-related gene	2518.32	1797.03	1.40116	0.486622	0.126323	1
ENSMUSG00000046275	Tusc5	tumor suppressor candidate 5	118.923	35.4185	3.29291	1.71936	0.302208	1
ENSMUSG00000020841	Cpd	carboxypeptidase D	4391.5	3259.17	1.34732	0.430094	0.179122	1
ENSMUSG00000020840	Blmh	bleomycin hydrolase	750.857	678.997	1.10568	0.144932	0.695467	1
ENSMUSG00000020838	Slc6a4	solute carrier family 6 (neurotransmitter transporter, serotonin), member 4	72.4207	44.3375	1.61942	0.695481	0.288019	1
ENSMUSG00000065518	Mir423	microRNA 423	7.5502	0.506147	5.67687	2.5051	0.238479	1
ENSMUSG00000020836	Coro6	coronin 6	41.1551	38.2184	1.07488	0.104177	0.872761	1
ENSMUSG00000011877	Git1	G protein-coupled receptor kinase-interactor 1	1367.98	1122.5	1.21849	0.285095	0.350885	1
ENSMUSG00000000686	Abhd15	abhydrolase domain containing 15	44.1818	15.6788	2.70893	1.43773	0.154935	1
ENSMUSG00000017291	Taok1	TAO kinase 1	3873.47	3618.66	1.0704	0.0981457	0.738972	1
ENSMUSG00000081451	Gm12734	predicted gene 12734	48.8835	39.7486	1.22418	0.291813	0.733275	1
ENSMUSG00000061981	Flot2	flotillin 2	949.15	759.528	1.24933	0.321154	0.338808	1
ENSMUSG00000020832	Eral1	Era (G-protein)-like 1 (E. coli)	188.241	178.823	1.05237	0.0736486	0.899219	1
ENSMUSG00000058546	Rpl23a	ribosomal protein L23A	24.8033	20.6276	1.19307	0.25468	0.751822	1
ENSMUSG00000002052	Supt6	suppressor of Ty 6	3113.63	2879.06	1.08145	0.112963	0.719264	1
ENSMUSG00000002064	Sdf2	stromal cell derived factor 2	325.172	315.254	1.03136	0.0445479	0.934921	1
ENSMUSG00000037593	BC030499	cDNA sequence BC030499	17.6954	17.4108	1.01546	0.0221278	0.940315	1
ENSMUSG00000050132	Sarm1	sterile alpha and HEAT/Armadillo motif containing 1	27.2662	23.9907	1.13107	0.177686	0.853538	1
ENSMUSG00000017344	Vtn	vitronectin	6.72433	4.11646	1.5097	0.594265	0.687354	1
ENSMUSG00000001103	Sebox	SEBOX homeobox	5.94249	0	6.94249	2.79545	0.217617	1
ENSMUSG00000017615	Tnfaip1	tumor necrosis factor, alpha-induced protein 1 (endothelial)	918.873	797.723	1.15168	0.20374	0.512151	1
ENSMUSG00000001105	Ift20	intraflagellar transport 20	431.986	377.317	1.1445	0.194723	0.578394	1
ENSMUSG00000037278	Tmem97	transmembrane protein 97	57.7039	57.531	1.00295	0.00425545	0.93835	1
ENSMUSG00000017376	Nlk	nemo like kinase	563.058	535.985	1.05042	0.0709608	0.865387	1
ENSMUSG00000080180	Gm17235	predicted gene 17235	13.0651	6.46726	1.88357	0.913467	0.514704	1
ENSMUSG00000082110	Gm11196	predicted gene 11196	30.7311	27.1285	1.12808	0.173864	0.772574	1
ENSMUSG00000049489	Fam58b	family with sequence similarity 58, member B	109.006	102.408	1.0638	0.0892337	0.940463	1
ENSMUSG00000020826	Nos2	nitric oxide synthase 2, inducible	65.2373	29.8056	2.15017	1.10445	0.0936557	1
ENSMUSG00000018334	Ksr1	kinase suppressor of ras 1	318.043	204.918	1.54937	0.631686	0.175708	1
ENSMUSG00000085941	Gm11201	predicted gene 11201	10.1599	3.25045	2.62557	1.39263	0.364127	1
ENSMUSG00000017677	Wsb1	WD repeat and SOCS box-containing 1	1520.61	1280.26	1.18759	0.248035	0.575785	1
ENSMUSG00000020716	Nf1	neurofibromatosis 1	2013.39	1927.2	1.0447	0.0630868	0.861914	1
ENSMUSG00000049612	Omg	oligodendrocyte myelin glycoprotein	28.3122	25.9363	1.0882	0.121949	0.830666	1
ENSMUSG00000035575	Utp6	UTP6 small subunit processome component	896.254	839.205	1.0679	0.0947753	0.795137	1
ENSMUSG00000017548	Suz12	suppressor of zeste 12 homolog (Drosophila)	682.459	643.364	1.06067	0.0849779	0.81981	1
ENSMUSG00000017550	Atad5	ATPase family, AAA domain containing 5	117.988	96.987	1.21433	0.280155	0.631738	1
ENSMUSG00000086507	Adap2os	ArfGAP with dual PH domains 2, opposite strand	40.4654	29.8729	1.3431	0.425571	0.554801	1
ENSMUSG00000020707	Rnf135	ring finger protein 135	94.3461	65.8312	1.42667	0.512652	0.356772	1
ENSMUSG00000017686	Rhot1	ras homolog family member T1	760.721	759.73	1.0013	0.00187959	0.994556	1
ENSMUSG00000057181	5730455P16Rik	RIKEN cDNA 5730455P16 gene	412.781	366.609	1.1256	0.170696	0.604079	1
ENSMUSG00000017428	Psmd11	proteasome (prosome, macropain) 26S subunit, non-ATPase, 11	645.76	626.808	1.03019	0.0429076	0.903156	1
ENSMUSG00000035441	Myo1d	myosin ID	2386.69	1745.8	1.36689	0.450902	0.408472	1
ENSMUSG00000085078	C030013C21Rik	RIKEN cDNA C030013C21 gene	13.5367	10.0103	1.32028	0.400849	0.824773	1
ENSMUSG00000035413	Tmem98	transmembrane protein 98	66.9017	55.2021	1.20817	0.272824	0.697421	1
ENSMUSG00000035385	Ccl2	chemokine (C-C motif) ligand 2	238.955	163.931	1.45488	0.540897	0.195346	1
ENSMUSG00000035352	Ccl12	chemokine (C-C motif) ligand 12	106.558	55.54	1.90233	0.92777	0.106777	1
ENSMUSG00000020701	Tmem132e	transmembrane protein 132E	9.68824	5.42132	1.66449	0.735081	0.707586	1
ENSMUSG00000020698	Cct6b	chaperonin containing Tcp1, subunit 6b (zeta)	5.42683	3.07052	1.57887	0.658895	0.755631	1
[truncated: 7,747 more rows]

## Sheet: up_young_female
Table S2 Differentially expressed genes, aged female vs. young female mice CoRL, up in young/down in aged
gene.id	gene.symbol	gene.name	Aged	Young	foldChange	log2FoldChange	pval	padj
ENSMUSG00000003477	Inmt	indolethylamine N-methyltransferase	129.257	1133.51	0.114813	-3.12264	1.00183e-17	6.69123e-14
ENSMUSG00000031494	Cd209a	CD209a antigen	11.5621	270.614	0.04625	-4.4344	1.8353e-15	9.19349e-12
ENSMUSG00000029445	Hpd	4-hydroxyphenylpyruvic acid dioxygenase	638.157	3008.24	0.212398	-2.23516	3.93033e-10	8.97375e-07
ENSMUSG00000061959	Ces1e	carboxylesterase 1E	54.5492	340.009	0.162897	-2.61797	3.9361e-09	7.88676e-06
ENSMUSG00000063730	Hsd3b2	hydroxy-delta-5-steroid dehydrogenase, 3 beta- and steroid delta-isomerase 2	197.936	837.212	0.237333	-2.07501	1.53773e-08	2.37011e-05
ENSMUSG00000028989	Angptl7	angiopoietin-like 7	24.273	529.998	0.0475953	-4.39304	3.34232e-07	0.000352474
ENSMUSG00000064339	mt-Rnr2	mitochondrially encoded 16S rRNA	4.06463e+06	1.13321e+07	0.358682	-1.47922	1.00476e-06	0.000958688
ENSMUSG00000039639	Kcne1	potassium voltage-gated channel, Isk-related subfamily, member 1	163.034	614.714	0.266412	-1.90827	1.97678e-06	0.00158435
ENSMUSG00000021565	Slc6a19	solute carrier family 6 (neurotransmitter transporter), member 19	1272.75	3441.52	0.370006	-1.43438	4.56562e-06	0.0027899
ENSMUSG00000038526	Car14	carbonic anhydrase 14	320.259	1081.89	0.296669	-1.75308	4.42276e-06	0.0027899
ENSMUSG00000053550	Shisa7	shisa family member 7	46.6427	220.966	0.214639	-2.22001	4.59484e-06	0.0027899
ENSMUSG00000041644	Slc5a12	solute carrier family 5 (sodium/glucose cotransporter), member 12	2089.08	5454.09	0.383143	-1.38405	1.32082e-05	0.00678597
ENSMUSG00000063590	Slc22a28	solute carrier family 22, member 28	49.0323	212.126	0.234754	-2.09078	1.39591e-05	0.00688585
ENSMUSG00000061906	Ugt2b38	UDP glucuronosyltransferase 2 family, polypeptide B38	185.041	652.393	0.28473	-1.81233	1.98712e-05	0.00847148
ENSMUSG00000038453	Srcin1	SRC kinase signaling inhibitor 1	307.778	869.581	0.354681	-1.49541	2.14957e-05	0.00879
ENSMUSG00000031461	Myom2	myomesin 2	66.2519	249.771	0.26818	-1.89873	2.44465e-05	0.00960459
ENSMUSG00000041372	B4galnt3	beta-1,4-N-acetyl-galactosaminyl transferase 3	215.874	632.137	0.34254	-1.54566	2.84847e-05	0.0109759
ENSMUSG00000044162	Tnip3	TNFAIP3 interacting protein 3	90.9566	301.499	0.30399	-1.71791	3.92748e-05	0.0140527
ENSMUSG00000053101	Gpr141	G protein-coupled receptor 141	16.7081	105.906	0.165642	-2.59386	4.00242e-05	0.0140696
ENSMUSG00000022180	Slc7a8	solute carrier family 7 (cationic amino acid transporter, y+ system), member 8	2375.16	5981.09	0.397212	-1.33202	4.67974e-05	0.0158929
ENSMUSG00000031725	Ces1f	carboxylesterase 1F	68.3668	245.127	0.281833	-1.82709	4.64474e-05	0.0158929
ENSMUSG00000064337	mt-Rnr1	mitochondrially encoded 12S rRNA	3.1746e+06	7.39167e+06	0.429483	-1.21933	5.03346e-05	0.0168093
ENSMUSG00000064368	mt-Nd6	mitochondrially encoded NADH dehydrogenase 6	47197.9	110015	0.429018	-1.22089	5.11745e-05	0.0168096
ENSMUSG00000024039	Cbs	cystathionine beta-synthase	440.144	1127.8	0.390808	-1.35547	5.49023e-05	0.0171454
ENSMUSG00000028357	Kif12	kinesin family member 12	970.852	2366.72	0.410458	-1.28469	5.39786e-05	0.0171454
ENSMUSG00000064349	mt-Tc	mitochondrially encoded tRNA cysteine	60.3722	223.115	0.273842	-1.86858	5.56196e-05	0.0171454
ENSMUSG00000064367	mt-Nd5	mitochondrially encoded NADH dehydrogenase 5	180479	414476	0.435441	-1.19945	5.75744e-05	0.0174791
ENSMUSG00000026535	Ifi202b	interferon activated gene 202B	3.84847	59.6784	0.0799044	-3.64558	6.70458e-05	0.0194695
ENSMUSG00000074796	Slc4a11	solute carrier family 4, sodium bicarbonate transporter-like, member 11	223.775	597.374	0.375643	-1.41257	7.86227e-05	0.0217959
ENSMUSG00000064354	mt-Co2	mitochondrially encoded cytochrome c oxidase II	560.083	1357.27	0.413086	-1.27549	8.01622e-05	0.0217959
ENSMUSG00000022330	Osr2	odd-skipped related 2	187.606	509.509	0.369447	-1.43656	9.3945e-05	0.0247681
ENSMUSG00000086600	C030005K06Rik	RIKEN cDNA C030005K06 gene	94.1175	372.57	0.254617	-1.9736	9.89423e-05	0.0257468
ENSMUSG00000085826	Gm15638	predicted gene 15638	42.9116	166.282	0.2625	-1.92961	0.00014354	0.0349163
ENSMUSG00000030781	Slc5a2	solute carrier family 5 (sodium/glucose cotransporter), member 2	864.546	2138.91	0.404478	-1.30587	0.000144635	0.0349163
ENSMUSG00000064370	mt-Cytb	mitochondrially encoded cytochrome b	215198	469477	0.45838	-1.12538	0.000149021	0.0355469
ENSMUSG00000030364	Clec2h	C-type lectin domain family 2, member h	280.437	708.474	0.396684	-1.33394	0.000172727	0.0380321
ENSMUSG00000006649	Nphs1	nephrosis 1, nephrin	28.046	126.365	0.228053	-2.13256	0.000191782	0.0404498
ENSMUSG00000064341	mt-Nd1	mitochondrially encoded NADH dehydrogenase 1	118380	253384	0.467201	-1.09789	0.000208113	0.0428607
ENSMUSG00000052562	Slc22a30	solute carrier family 22, member 30	10.8537	76.5948	0.152764	-2.71063	0.000224119	0.0441968
ENSMUSG00000022829	Stxbp5l	syntaxin binding protein 5-like	84.3978	294.704	0.288795	-1.79188	0.000227785	0.044312
ENSMUSG00000023013	Aqp2	aquaporin 2	668.78	1637.2	0.40885	-1.29036	0.00023862	0.0458803
ENSMUSG00000021207	Akr1c21	aldo-keto reductase family 1, member C21	1987.06	4692.86	0.423545	-1.23941	0.000252617	0.0468675
ENSMUSG00000056162	Cndp1	carnosine dipeptidase 1 (metallopeptidase M20 family)	167.907	445.543	0.378255	-1.40257	0.000317925	0.0544468
ENSMUSG00000054641	Mmrn1	multimerin 1	7.63824	61.1749	0.138935	-2.84752	0.00034211	0.0575477
ENSMUSG00000064351	mt-Co1	mitochondrially encoded cytochrome c oxidase I	351126	732007	0.479676	-1.05987	0.000347521	0.0575477
ENSMUSG00000020988	L2hgdh	L-2-hydroxyglutarate dehydrogenase	319.207	763.058	0.419087	-1.25468	0.000365788	0.0591072
ENSMUSG00000089678	Agxt2	alanine-glyoxylate aminotransferase 2	305.29	799.117	0.382807	-1.38531	0.00039358	0.0620958
ENSMUSG00000064363	mt-Nd4	mitochondrially encoded NADH dehydrogenase 4	90578.1	186833	0.48481	-1.04451	0.000455266	0.0701704
ENSMUSG00000006469	Slc34a3	solute carrier family 34 (sodium phosphate), member 3	179.086	531.371	0.33827	-1.56375	0.000459093	0.0702202
ENSMUSG00000040181	Fmo1	flavin containing monooxygenase 1	2653.3	5593.64	0.474436	-1.07572	0.000494725	0.0720839
ENSMUSG00000024552	Slc14a2	solute carrier family 14 (urea transporter), member 2	1945.99	4085.63	0.47643	-1.06966	0.000494984	0.0720839
ENSMUSG00000032373	Car12	carbonic anhydrase 12	1402.26	2961.36	0.473698	-1.07796	0.00048095	0.0720839
ENSMUSG00000074179	Gm10639	predicted gene 10639	25.734	112.441	0.235665	-2.08519	0.000496461	0.0720839
ENSMUSG00000016239	Lonrf3	LON peptidase N-terminal domain and ring finger 3	336.608	781.898	0.431229	-1.21347	0.000489048	0.0720839
ENSMUSG00000020990	Cdkl1	cyclin-dependent kinase-like 1 (CDC2-related kinase)	1156.12	2445.03	0.473061	-1.0799	0.000513581	0.0740333
ENSMUSG00000047986	Palm3	paralemmin 3	113.917	310.687	0.368695	-1.4395	0.000534059	0.0764352
ENSMUSG00000031891	Hsd11b2	hydroxysteroid 11-beta dehydrogenase 2	1199.59	3059.24	0.392319	-1.3499	0.00055008	0.0781699
ENSMUSG00000010066	Cacna2d2	calcium channel, voltage-dependent, alpha 2/delta subunit 2	52.5726	174.155	0.305858	-1.70907	0.000569682	0.0792689
ENSMUSG00000064345	mt-Nd2	mitochondrially encoded NADH dehydrogenase 2	91917.5	187015	0.491501	-1.02473	0.000587291	0.0795105
ENSMUSG00000078503	Zfp990	zinc finger protein 990	0	21.8652	0.0437345	-4.51508	0.000611548	0.0816906
ENSMUSG00000002032	Tmem25	transmembrane protein 25	166.786	420.406	0.398157	-1.32859	0.000657928	0.0856033
ENSMUSG00000019787	Trdn	triadin	0	21.5727	0.0443014	-4.4965	0.000726217	0.0909451
ENSMUSG00000030945	Acsm2	acyl-CoA synthetase medium-chain family member 2	6213.36	13739.3	0.452274	-1.14473	0.000775852	0.0959614
ENSMUSG00000000673	Haao	3-hydroxyanthranilate 3,4-dioxygenase	283.684	653.666	0.434853	-1.2014	0.000792048	0.0967699
ENSMUSG00000026415	Fcamr	Fc receptor, IgA, IgM, high affinity	37.3674	130.954	0.290763	-1.78209	0.000856387	0.10337
ENSMUSG00000043252	Tmem64	transmembrane protein 64	569.514	1211.52	0.470521	-1.08767	0.000872835	0.104725
ENSMUSG00000005089	Slc1a2	solute carrier family 1 (glial high affinity glutamate transporter), member 2	76.9336	222.564	0.348597	-1.52037	0.000891068	0.105647
ENSMUSG00000036875	Dna2	DNA replication helicase/nuclease 2	87.6992	253.797	0.348117	-1.52236	0.00108424	0.12205
ENSMUSG00000040473	Cfap69	cilia and flagella associated protein 69	101.192	266.654	0.381806	-1.38909	0.00111591	0.124219
ENSMUSG00000027577	Chrna4	cholinergic receptor, nicotinic, alpha polypeptide 4	439.521	936.19	0.470045	-1.08913	0.00119076	0.127589
ENSMUSG00000059751	Rps3a3	ribosomal protein S3A3	408.537	862.116	0.474486	-1.07556	0.00128127	0.131528
ENSMUSG00000024391	Apom	apolipoprotein M	234.677	536.13	0.43877	-1.18846	0.0012866	0.131528
ENSMUSG00000030562	Nox4	NADPH oxidase 4	1868.73	3887.28	0.480864	-1.0563	0.00126809	0.131528
ENSMUSG00000034424	Gcsh	glycine cleavage system protein H (aminomethyl carrier)	341.419	762.318	0.448593	-1.15652	0.00127996	0.131528
ENSMUSG00000092837	Rpph1	ribonuclease P RNA component H1	36020.7	69316.8	0.51966	-0.944359	0.00134624	0.134873
ENSMUSG00000001986	Gria3	glutamate receptor, ionotropic, AMPA3 (alpha 3)	120.405	301.262	0.401654	-1.31597	0.00142322	0.139789
ENSMUSG00000022580	Rhpn1	rhophilin, Rho GTPase binding protein 1	53.9414	163.819	0.333344	-1.58491	0.00149343	0.139831
ENSMUSG00000092323	BB365896	expressed sequence BB365896	54.3711	162.065	0.339565	-1.55824	0.00144871	0.139831
ENSMUSG00000035878	Hykk	hydroxylysine kinase 1	1293.86	2616.48	0.494698	-1.01538	0.0014832	0.139831
ENSMUSG00000064372	mt-Tp	mitochondrially encoded tRNA proline	509.106	1044.21	0.488041	-1.03493	0.00146011	0.139831
ENSMUSG00000052102	Gnpda1	glucosamine-6-phosphate deaminase 1	283.596	624.839	0.454743	-1.13688	0.00152579	0.141539
ENSMUSG00000004231	Pax2	paired box 2	435.595	910.648	0.478908	-1.06218	0.00156306	0.144327
ENSMUSG00000059040	Eno1b	enolase 1B, retrotransposed	299.149	657.478	0.455822	-1.13346	0.00161078	0.147246
ENSMUSG00000069324	Gm5096	predicted gene 5096	14.6141	72.7709	0.211656	-2.2402	0.00163141	0.147246
ENSMUSG00000026295	Spp2	secreted phosphoprotein 2	956.196	1988.58	0.481106	-1.05557	0.00172241	0.150707
ENSMUSG00000057103	Nat8f1	N-acetyltransferase 8 (GCN5-related) family member 1	319.716	917.821	0.349051	-1.51849	0.00171499	0.150707
ENSMUSG00000005268	Prlr	prolactin receptor	1108.67	2153.1	0.515143	-0.956956	0.00189192	0.162002
ENSMUSG00000058488	Kl	klotho	5212.5	10104.7	0.515898	-0.954843	0.00188015	0.162002
ENSMUSG00000040165	Cd209c	CD209c antigen	0.412934	22.7985	0.0593707	-4.07411	0.00189118	0.162002
ENSMUSG00000022763	Aifm3	apoptosis-inducing factor, mitochondrion-associated 3	26.2643	102.711	0.262887	-1.92749	0.00197597	0.167057
ENSMUSG00000028487	Bnc2	basonuclin 2	682.792	1452.43	0.470466	-1.08784	0.00197381	0.167057
ENSMUSG00000050075	Gpr171	G protein-coupled receptor 171	26.0274	97.5268	0.274316	-1.86609	0.00199519	0.167973
ENSMUSG00000044337	Ackr3	atypical chemokine receptor 3	256.527	556.05	0.462304	-1.11308	0.00206578	0.172467
ENSMUSG00000038071	Npy6r	neuropeptide Y receptor Y6	12.3273	67.3379	0.19502	-2.35831	0.0022568	0.18457
ENSMUSG00000032796	Lama1	laminin, alpha 1	241.787	528.831	0.458234	-1.12584	0.00236047	0.189947
ENSMUSG00000033676	Gabrb3	gamma-aminobutyric acid (GABA) A receptor, subunit beta 3	115.1	315.399	0.36694	-1.44638	0.00237316	0.190204
ENSMUSG00000028435	Aqp3	aquaporin 3	815.04	1671.09	0.488036	-1.03494	0.00238607	0.190477
ENSMUSG00000000861	Bcl11a	B cell CLL/lymphoma 11A (zinc finger protein)	19.2004	79.2836	0.251613	-1.99072	0.00244438	0.192827
ENSMUSG00000032357	Tinag	tubulointerstitial nephritis antigen	831.681	1639.53	0.507567	-0.97833	0.00250354	0.196719
ENSMUSG00000026870	Cutal	cutA divalent cation tolerance homolog-like	136.287	318.246	0.430036	-1.21747	0.00256495	0.199241
ENSMUSG00000005980	Dnase1	deoxyribonuclease I	1414.46	3018.07	0.468838	-1.09284	0.00262817	0.203323
ENSMUSG00000090168	D630014O11Rik	RIKEN cDNA D630014O11 gene	11.2079	62.1755	0.193238	-2.37155	0.00263834	0.203324
ENSMUSG00000023169	Slc38a1	solute carrier family 38, member 1	151.36	368.433	0.412416	-1.27783	0.0027257	0.206983
ENSMUSG00000027562	Car2	carbonic anhydrase 2	1958.88	3641.26	0.538094	-0.894071	0.00272713	0.206983
ENSMUSG00000046959	Slc26a1	solute carrier family 26 (sulfate transporter), member 1	601.259	1311.42	0.458894	-1.12377	0.00276762	0.209263
ENSMUSG00000000318	Clec10a	C-type lectin domain family 10, member A	20.4832	83.1747	0.255222	-1.97018	0.00289335	0.215766
ENSMUSG00000012350	Ehf	ets homologous factor	559.27	1106.31	0.505976	-0.98286	0.00298317	0.220567
ENSMUSG00000034762	Glis1	GLIS family zinc finger 1	119.036	284.953	0.419776	-1.25231	0.00324288	0.237145
ENSMUSG00000079465	Col4a3	collagen, type IV, alpha 3	3171.16	5894.97	0.538022	-0.894262	0.00332807	0.240739
ENSMUSG00000063021	Hist1h2ak	histone cluster 1, H2ak	26.3817	92.0045	0.294412	-1.76409	0.00341596	0.245325
ENSMUSG00000021490	Slc34a1	solute carrier family 34 (sodium phosphate), member 1	14420.9	32341	0.445917	-1.16515	0.0034748	0.246732
ENSMUSG00000034871	Fam151a	family with sequence simliarity 151, member A	87.5358	225.217	0.391375	-1.35338	0.00347483	0.246732
ENSMUSG00000046312	AI464131	expressed sequence AI464131	280.965	586.631	0.479834	-1.05939	0.0036085	0.252809
ENSMUSG00000021379	Id4	inhibitor of DNA binding 4	228.969	474.935	0.483194	-1.04933	0.00363245	0.252826
ENSMUSG00000034687	Fras1	Fraser extracellular matrix complex subunit 1	881.644	1660.04	0.53138	-0.912184	0.00397052	0.269937
ENSMUSG00000050074	Spink8	serine peptidase inhibitor, Kazal type 8	51.0215	146.858	0.351833	-1.50704	0.00397421	0.269937
ENSMUSG00000026200	Glb1l	galactosidase, beta 1-like	470.594	936.278	0.503153	-0.990932	0.00398772	0.269939
ENSMUSG00000030589	Rasgrp4	RAS guanyl releasing protein 4	29.7732	100.878	0.302059	-1.7271	0.00405852	0.272888
ENSMUSG00000009378	Slc16a12	solute carrier family 16 (monocarboxylic acid transporters), member 12	742.16	1431.45	0.518805	-0.946737	0.00432468	0.287886
ENSMUSG00000020904	Cfap52	cilia and flagella associated protein 52	21.5292	80.2169	0.277396	-1.84998	0.0044616	0.29025
ENSMUSG00000062210	Tnfaip8	tumor necrosis factor, alpha-induced protein 8	899.681	2096.26	0.429456	-1.21942	0.00445026	0.29025
ENSMUSG00000062563	Cys1	cystin 1	447.602	873.092	0.513221	-0.962349	0.00457443	0.295671
ENSMUSG00000087030	Gm16143	predicted gene 16143	0	20.4931	0.0465266	-4.4258	0.00462115	0.29773
ENSMUSG00000039450	Dcxr	dicarbonyl L-xylulose reductase	435.046	879.482	0.495236	-1.01381	0.00465911	0.299214
ENSMUSG00000087042	Gm11611	predicted gene 11611	36.4828	115.286	0.322334	-1.63337	0.00477842	0.303953
ENSMUSG00000037703	Lzts3	leucine zipper, putative tumor suppressor family member 3	1144.83	2327.49	0.492092	-1.023	0.00485534	0.307868
ENSMUSG00000054226	Tprkb	Tp53rk binding protein	429.292	835.02	0.514691	-0.95822	0.00490553	0.309095
ENSMUSG00000038224	Serpinf2	serine (or cysteine) peptidase inhibitor, clade F, member 2	124.595	284.953	0.439216	-1.187	0.00506297	0.318015
ENSMUSG00000086784	Isoc2a	isochorismatase domain containing 2a	480.611	1019.91	0.471745	-1.08392	0.00512385	0.319834
ENSMUSG00000022366	Slc22a22	solute carrier family 22 (organic cation transporter), member 22	83.746	201.655	0.418178	-1.25781	0.00547834	0.338795
ENSMUSG00000024411	Aqp4	aquaporin 4	344.064	662.418	0.520131	-0.943053	0.00579298	0.350104
ENSMUSG00000029556	Hnf1a	HNF1 homeobox A	342.851	751.127	0.457171	-1.12919	0.0059408	0.355331
ENSMUSG00000047797	Gjb1	gap junction protein, beta 1	102.888	231.079	0.447639	-1.15959	0.00634733	0.372966
ENSMUSG00000056973	Ces1d	carboxylesterase 1D	540.904	2065.63	0.262216	-1.93117	0.00649173	0.378194
ENSMUSG00000024521	Pmaip1	phorbol-12-myristate-13-acetate-induced protein 1	453.117	829.433	0.546843	-0.870801	0.00691934	0.396122
ENSMUSG00000020261	Slc36a1	solute carrier family 36 (proton/amino acid symporter), member 1	482.29	901.897	0.535266	-0.901671	0.00744139	0.412436
ENSMUSG00000019312	Grb7	growth factor receptor bound protein 7	497.51	984.946	0.505616	-0.983885	0.00746571	0.412436
ENSMUSG00000027887	Sypl2	synaptophysin-like 2	145.523	383.243	0.381328	-1.3909	0.00746757	0.412436
ENSMUSG00000068740	Celsr2	cadherin, EGF LAG seven-pass G-type receptor 2	1979.55	3535.09	0.560096	-0.836255	0.00743429	0.412436
ENSMUSG00000068303	Spr-ps1	sepiapterin reductase pseudogene 1	0	15.3526	0.0611523	-4.03145	0.00741614	0.412436
ENSMUSG00000030830	Itgal	integrin alpha L	375.194	723.539	0.519218	-0.945587	0.00738568	0.412436
ENSMUSG00000074497	A430078G23Rik	RIKEN cDNA A430078G23 gene	8.31737	45.1699	0.201806	-2.30896	0.00734979	0.412436
ENSMUSG00000062410	Hsd3b3	hydroxy-delta-5-steroid dehydrogenase, 3 beta- and steroid delta-isomerase 3	154.343	392.771	0.394501	-1.3419	0.00756886	0.416641
ENSMUSG00000036764	Dnajc12	DnaJ heat shock protein family (Hsp40) member C12	292.961	607.463	0.48312	-1.04955	0.00765949	0.419326
ENSMUSG00000026156	B3gat2	beta-1,3-glucuronyltransferase 2 (glucuronosyltransferase S)	369.081	703.031	0.525661	-0.927797	0.00775018	0.420199
ENSMUSG00000026189	Pecr	peroxisomal trans-2-enoyl-CoA reductase	645.751	1374.61	0.470155	-1.08879	0.00774809	0.420199
ENSMUSG00000022240	Ctnnd2	catenin (cadherin associated protein), delta 2	45.995	125.848	0.370484	-1.43252	0.00778083	0.420199
ENSMUSG00000059213	Ddn	dendrin	23.7553	106.896	0.229436	-2.12384	0.0077232	0.420199
ENSMUSG00000084854	Gm12678	predicted gene 12678	53.8261	143.686	0.378933	-1.39999	0.0078162	0.420199
ENSMUSG00000029369	Afm	afamin	401.462	761.045	0.528135	-0.921023	0.00787804	0.420951
ENSMUSG00000020258	Glyctk	glycerate kinase	178.748	405.931	0.441717	-1.17881	0.00787825	0.420951
ENSMUSG00000038765	Lmx1b	LIM homeobox transcription factor 1 beta	5.98651	37.8703	0.179739	-2.47602	0.00801343	0.423838
ENSMUSG00000026065	Slc9a4	solute carrier family 9 (sodium/hydrogen exchanger), member 4	29.6851	95.7377	0.3172	-1.65654	0.0082525	0.432936
ENSMUSG00000018339	Gpx3	glutathione peroxidase 3	84044.8	153444	0.547727	-0.86847	0.00838788	0.437041
ENSMUSG00000020437	Myo1g	myosin IG	287.279	557.703	0.515978	-0.954618	0.00855608	0.440715
ENSMUSG00000000216	Scnn1g	sodium channel, nonvoltage-gated 1 gamma	525.305	1114.05	0.472	-1.08314	0.00865072	0.442907
ENSMUSG00000040350	Trim7	tripartite motif-containing 7	563.789	1331.52	0.42385	-1.23838	0.00875236	0.446237
ENSMUSG00000029822	Osbpl3	oxysterol binding protein-like 3	1128.04	2016.57	0.559602	-0.837527	0.00884012	0.448424
ENSMUSG00000074968	Ano3	anoctamin 3	106.705	341.638	0.314339	-1.6696	0.00895576	0.450453
ENSMUSG00000028836	Slc30a2	solute carrier family 30 (zinc transporter), member 2	99.4668	226.781	0.441067	-1.18093	0.00896995	0.450453
ENSMUSG00000087233	Gm43213	predicted gene 43213	74.3533	172.941	0.433212	-1.20686	0.00915941	0.456376
ENSMUSG00000001773	Folh1	folate hydrolase 1	1015.11	1841.5	0.551481	-0.858618	0.00917899	0.456376
ENSMUSG00000082280	Gm5847	predicted gene 5847	75.6214	180.184	0.422894	-1.24163	0.00920288	0.456431
ENSMUSG00000048281	Dleu7	deleted in lymphocytic leukemia, 7	26.7799	85.8854	0.319731	-1.64507	0.00926593	0.457294
ENSMUSG00000036832	Lpar3	lysophosphatidic acid receptor 3	100.117	226.208	0.44504	-1.16799	0.00934607	0.457866
ENSMUSG00000052565	Hist1h1d	histone cluster 1, H1d	258.688	504.986	0.513231	-0.962321	0.00953311	0.457976
ENSMUSG00000029516	Cit	citron	322.3	611.185	0.528109	-0.921091	0.00939514	0.457976
ENSMUSG00000004446	Bid	BH3 interacting domain death agonist	314.383	595.978	0.5283	-0.920572	0.00956475	0.457976
ENSMUSG00000038745	Nlrp6	NLR family, pyrin domain containing 6	474.287	1046.9	0.453564	-1.14062	0.00952639	0.457976
ENSMUSG00000069835	Sat2	spermidine/spermine N1-acetyl transferase 2	59.7832	146.307	0.41263	-1.27708	0.00984358	0.463543
ENSMUSG00000044986	Tst	thiosulfate sulfurtransferase, mitochondrial	143.546	297.438	0.484341	-1.0459	0.00988693	0.463543
ENSMUSG00000030468	Siglecg	sialic acid binding Ig-like lectin G	8.33204	42.7518	0.213295	-2.22908	0.0098864	0.463543
ENSMUSG00000030834	Abcc6	ATP-binding cassette, sub-family C (CFTR/MRP), member 6	85.4878	199.18	0.43205	-1.21073	0.00990821	0.463543
ENSMUSG00000052013	Btla	B and T lymphocyte associated	17.534	63.6384	0.286733	-1.80222	0.00994859	0.463581
ENSMUSG00000048997	Atxn7l2	ataxin 7-like 2	100.735	221.99	0.45623	-1.13217	0.010474	0.475311
ENSMUSG00000040860	Crocc	ciliary rootlet coiled-coil, rootletin	952.281	2026.18	0.470249	-1.0885	0.010485	0.475311
ENSMUSG00000038009	Dnajc22	DnaJ heat shock protein family (Hsp40) member C22	163.853	354.114	0.464226	-1.1071	0.0105381	0.475567
ENSMUSG00000032492	Pth1r	parathyroid hormone 1 receptor	2475.13	4324.29	0.572478	-0.804708	0.0105314	0.475567
ENSMUSG00000035852	Misp	mitotic spindle positioning	308.099	563.734	0.547336	-0.869502	0.0106049	0.476435
ENSMUSG00000032511	Scn5a	sodium channel, voltage-gated, type V, alpha	4.61564	32.5952	0.167156	-2.58073	0.0106845	0.477869
ENSMUSG00000022066	Gm21685	predicted gene, 21685	503.564	908.769	0.554606	-0.850464	0.0107782	0.479916
ENSMUSG00000044349	Snhg11	small nucleolar RNA host gene 11	410.471	1142.88	0.359715	-1.47507	0.0108125	0.480377
ENSMUSG00000067158	Col4a4	collagen, type IV, alpha 4	4067.44	7061.7	0.576046	-0.795745	0.0108737	0.482028
ENSMUSG00000089840	Gm4491	predicted gene 4491	6.19401	37.3641	0.187519	-2.41489	0.0109527	0.483396
ENSMUSG00000028434	Epb41l4b	erythrocyte membrane protein band 4.1 like 4b	201.703	390.522	0.517729	-0.94973	0.011031	0.483649
ENSMUSG00000070985	Acnat1	acyl-coenzyme A amino acid N-acyltransferase 1	186.206	370.591	0.503796	-0.989089	0.0111485	0.486672
ENSMUSG00000026073	Il1r2	interleukin 1 receptor, type II	20.9695	71.7587	0.301951	-1.72762	0.0112083	0.487231
ENSMUSG00000030223	Ptpro	protein tyrosine phosphatase, receptor type, O	158.217	317.639	0.499678	-1.00093	0.0112949	0.489862
ENSMUSG00000025176	Hoga1	4-hydroxy-2-oxoglutarate aldolase 1	393.74	755.062	0.5221	-0.937601	0.0114926	0.494159
ENSMUSG00000018168	Ikzf3	IKAROS family zinc finger 3	88.5231	193.535	0.46019	-1.1197	0.0116254	0.497732
ENSMUSG00000024064	Galnt14	UDP-N-acetyl-alpha-D-galactosamine:polypeptide N-acetylgalactosaminyltransferase 14	364.346	675.126	0.540353	-0.888027	0.0118037	0.502146
ENSMUSG00000038843	Gcnt1	glucosaminyl (N-acetyl) transferase 1, core 2	2256.95	4053.94	0.556841	-0.844663	0.0119147	0.504872
ENSMUSG00000032735	Ablim3	actin binding LIM protein family, member 3	100.318	222.979	0.452354	-1.14448	0.0119646	0.505579
ENSMUSG00000030549	Rhcg	Rhesus blood group-associated C glycoprotein	881.095	1555.54	0.566703	-0.819334	0.0119874	0.505579
ENSMUSG00000030268	Bcat1	branched chain aminotransferase 1, cytosolic	115.435	241.438	0.480268	-1.05809	0.0121598	0.510788
ENSMUSG00000018819	Lsp1	lymphocyte specific 1	373.749	885.14	0.422901	-1.24161	0.0124267	0.51982
ENSMUSG00000048826	Dact2	dishevelled-binding antagonist of beta-catenin 2	171.016	329.371	0.520674	-0.941548	0.0124582	0.52005
ENSMUSG00000018486	Wnt9b	wingless-type MMTV integration site family, member 9B	24.6712	92.5881	0.2743	-1.86617	0.0125166	0.520323
ENSMUSG00000026368	F13b	coagulation factor XIII, beta subunit	558.012	998.849	0.559097	-0.838829	0.0126249	0.522657
ENSMUSG00000023861	Mpc1	mitochondrial pyruvate carrier 1	119.86	256.114	0.470063	-1.08907	0.0126165	0.522657
ENSMUSG00000063063	Ctnna2	catenin (cadherin associated protein), alpha 2	2.4776	26.049	0.128567	-2.95941	0.0126838	0.524011
ENSMUSG00000022751	Nit2	nitrilase family, member 2	190.734	373.088	0.512536	-0.964275	0.0127155	0.52424
ENSMUSG00000005364	Il5ra	interleukin 5 receptor, alpha	47.4413	124.43	0.386202	-1.37257	0.0127745	0.52559
ENSMUSG00000021240	Abcd4	ATP-binding cassette, sub-family D (ALD), member 4	258.874	481.21	0.538923	-0.89185	0.0130393	0.532704
ENSMUSG00000024503	Spink1	serine peptidase inhibitor, Kazal type 1	446.151	880.538	0.50724	-0.97926	0.0131736	0.536504
ENSMUSG00000040808	S100g	S100 calcium binding protein G	6908.13	11507.6	0.600347	-0.736131	0.0133593	0.542786
ENSMUSG00000036330	Slc18a1	solute carrier family 18 (vesicular monoamine), member 1	571.88	1065.8	0.537006	-0.896991	0.0134735	0.544137
ENSMUSG00000055435	Maf	avian musculoaponeurotic fibrosarcoma oncogene homolog	2938.51	5861.08	0.501444	-0.995838	0.0134968	0.544137
ENSMUSG00000028145	Them4	thioesterase superfamily member 4	97.4462	208.269	0.470429	-1.08795	0.0137542	0.55093
ENSMUSG00000029016	Clcn6	chloride channel, voltage-sensitive 6	335.628	608.925	0.551917	-0.857477	0.0138028	0.55093
ENSMUSG00000029368	Alb	albumin	74.3093	168.487	0.444337	-1.17027	0.013722	0.55093
ENSMUSG00000027762	Sucnr1	succinate receptor 1	35.657	100.079	0.362655	-1.46333	0.0139205	0.551234
ENSMUSG00000048424	Ranbp3l	RAN binding protein 3-like	303.947	574.417	0.529958	-0.916051	0.0142504	0.551482
ENSMUSG00000023122	Sult1c2	sulfotransferase family, cytosolic, 1C, member 2	619.904	1088.5	0.569897	-0.811226	0.0142475	0.551482
ENSMUSG00000024043	Arhgap28	Rho GTPase activating protein 28	24.2563	99.5616	0.251152	-1.99337	0.0139713	0.551482
ENSMUSG00000069094	Pde7a	phosphodiesterase 7A	416.986	732.423	0.569912	-0.81119	0.0141976	0.551482
ENSMUSG00000027761	Aadac	arylacetamide deacetylase (esterase)	306.416	563.529	0.544553	-0.876856	0.0141454	0.551482
ENSMUSG00000086868	Gm15883	predicted gene 15883	9.99845	46.643	0.230852	-2.11496	0.0142425	0.551482
ENSMUSG00000000486	Sept1	septin 1	53.9561	129.29	0.421799	-1.24537	0.014141	0.551482
ENSMUSG00000023015	Racgap1	Rac GTPase-activating protein 1	16.6788	60.1626	0.289045	-1.79063	0.0145312	0.556715
ENSMUSG00000090256	Alms1-ps1	Alstrom syndrome 1, pseudogene 1	10.795	49.241	0.234768	-2.09069	0.0144478	0.556715
ENSMUSG00000030091	Nup210	nucleoporin 210	335.969	596.824	0.56366	-0.827104	0.0144627	0.556715
ENSMUSG00000032246	Calml4	calmodulin-like 4	963.572	1902.23	0.506808	-0.980488	0.0145282	0.556715
ENSMUSG00000029073	Cptp	ceramide-1-phosphate transfer protein	144.026	279.972	0.516159	-0.954114	0.0146425	0.556722
ENSMUSG00000035000	Dpp4	dipeptidylpeptidase 4	714.357	1235.93	0.578331	-0.790033	0.0148939	0.563073
ENSMUSG00000022055	Nefl	neurofilament, light polypeptide	9.58552	44.5511	0.232388	-2.10539	0.01495	0.564132
ENSMUSG00000027832	Ptx3	pentraxin related gene	2.96391	26.735	0.14292	-2.80672	0.0151398	0.570218
ENSMUSG00000040170	Fmo2	flavin containing monooxygenase 2	2145.2	3852.57	0.556939	-0.844409	0.0152272	0.572435
ENSMUSG00000085087	Gm13528	predicted gene 13528	31.4396	92.5209	0.34687	-1.52753	0.0154856	0.578889
ENSMUSG00000058921	Slc10a5	solute carrier family 10 (sodium/bile acid cotransporter family), member 5	261.89	562.426	0.466592	-1.09977	0.0155838	0.580395
ENSMUSG00000092572	Serpinb10	serine (or cysteine) peptidase inhibitor, clade B (ovalbumin), member 10	6.3114	35.6994	0.199224	-2.32754	0.0157471	0.581691
ENSMUSG00000026579	F5	coagulation factor V	210.404	396.112	0.532353	-0.909546	0.0156821	0.581691
ENSMUSG00000026494	Kif26b	kinesin family member 26B	100.863	214.106	0.473548	-1.07842	0.0157601	0.581691
ENSMUSG00000034285	Nipsnap1	nipsnap homolog 1 (C. elegans)	460.493	803.944	0.573323	-0.802581	0.0157947	0.581691
ENSMUSG00000061808	Ttr	transthyretin	141.957	382.547	0.372724	-1.42382	0.0158218	0.581691
ENSMUSG00000036892	Prodh2	proline dehydrogenase (oxidase) 2	462.035	1060.22	0.436322	-1.19653	0.0157989	0.581691
ENSMUSG00000034813	Grip1	glutamate receptor interacting protein 1	42.6622	112.901	0.383333	-1.38333	0.0159181	0.583093
ENSMUSG00000030244	Gys2	glycogen synthase 2	57.0415	137.297	0.419686	-1.25262	0.016294	0.589319
ENSMUSG00000044433	Camsap3	calmodulin regulated spectrin-associated protein family, member 3	238.158	443.868	0.537593	-0.895413	0.0162657	0.589319
ENSMUSG00000089804	Gm16136	predicted gene 16136	26.912	105.23	0.26275	-1.92823	0.0164906	0.592595
ENSMUSG00000044254	Pcsk9	proprotein convertase subtilisin/kexin type 9	71.9491	162.986	0.444848	-1.16861	0.0165029	0.592595
ENSMUSG00000028737	Aldh4a1	aldehyde dehydrogenase 4 family, member A1	2043.05	3665.65	0.557469	-0.843037	0.0164428	0.592595
ENSMUSG00000055373	Fut9	fucosyltransferase 9	2753.87	5475.43	0.503041	-0.991252	0.0166773	0.594595
ENSMUSG00000027820	Mme	membrane metallo endopeptidase	1227.76	2016.31	0.609107	-0.715231	0.0167143	0.594857
ENSMUSG00000026832	Cytip	cytohesin 1 interacting protein	506.708	876.996	0.578258	-0.790216	0.0167509	0.595101
ENSMUSG00000074207	Adh1	alcohol dehydrogenase 1 (class I)	353.715	636.941	0.556031	-0.846763	0.0168175	0.59641
ENSMUSG00000052566	Hook2	hook microtubule tethering protein 2	504.824	994.46	0.50813	-0.976729	0.0170119	0.601177
ENSMUSG00000054986	Sec14l3	SEC14-like lipid binding 3	15.9116	195.674	0.085988	-3.53972	0.0171108	0.60118
ENSMUSG00000048022	Tmem229a	transmembrane protein 229A	874.182	1493.44	0.585624	-0.771953	0.0170656	0.60118
ENSMUSG00000026202	Tuba4a	tubulin, alpha 4A	535.831	928.137	0.577774	-0.791423	0.0172002	0.601467
ENSMUSG00000029074	Ttll10	tubulin tyrosine ligase-like family, member 10	150.138	308.01	0.489104	-1.03179	0.017254	0.602045
ENSMUSG00000079494	Nat8f5	N-acetyltransferase 8 (GCN5-related) family member 5	1.65173	28.8606	0.0888039	-3.49323	0.0173369	0.602045
ENSMUSG00000037747	Phyhipl	phytanoyl-CoA hydroxylase interacting protein-like	369.907	661.472	0.559884	-0.8368	0.01774	0.610119
ENSMUSG00000022445	Cyp2d26	cytochrome P450, family 2, subfamily d, polypeptide 26	830.532	1697.56	0.48955	-1.03047	0.0178484	0.611331
ENSMUSG00000064225	Paqr9	progestin and adipoQ receptor family member IX	233.339	442.856	0.527962	-0.921493	0.018035	0.614571
ENSMUSG00000068397	Gm10240	predicted gene 10240	69.0418	152.268	0.456989	-1.12977	0.0181805	0.617429
ENSMUSG00000020072	Pbld2	phenazine biosynthesis-like protein domain containing 2	676.629	1331.38	0.508586	-0.975435	0.018483	0.624527
ENSMUSG00000043789	Vwce	von Willebrand factor C and EGF domains	71.3454	162.615	0.442169	-1.17733	0.0187865	0.626332
ENSMUSG00000009614	Sardh	sarcosine dehydrogenase	1452.49	2606.68	0.557391	-0.843239	0.018707	0.626332
ENSMUSG00000050730	Arhgap42	Rho GTPase activating protein 42	480.72	839.552	0.5731	-0.80314	0.0186725	0.626332
ENSMUSG00000020867	Spata20	spermatogenesis associated 20	0	12.2484	0.0754806	-3.72775	0.0188823	0.628481
ENSMUSG00000027831	Veph1	ventricular zone expressed PH domain-containing 1	662.833	1122.9	0.590652	-0.75962	0.0190864	0.631229
ENSMUSG00000025486	Sirt3	sirtuin 3	233.22	434.566	0.537737	-0.895028	0.0190909	0.631229
ENSMUSG00000026489	Coq8a	coenzyme Q8A	983.081	1641.88	0.598999	-0.739375	0.0191826	0.631335
ENSMUSG00000029059	Fam213b	family with sequence similarity 213, member B	53.1029	124.015	0.432773	-1.20832	0.0191887	0.631335
ENSMUSG00000021765	Fst	follistatin	182.32	341.191	0.535725	-0.900436	0.0192894	0.631785
ENSMUSG00000004626	Stxbp2	syntaxin binding protein 2	652.172	1126.11	0.579509	-0.787096	0.0192969	0.631785
ENSMUSG00000036853	Mcoln3	mucolipin 3	80.9729	255.259	0.319883	-1.64438	0.0193987	0.633047
ENSMUSG00000025036	Sfxn2	sideroflexin 2	367.457	650.562	0.565498	-0.822406	0.0196566	0.635257
ENSMUSG00000030674	Qprt	quinolinate phosphoribosyltransferase	132.028	259.501	0.510662	-0.96956	0.0196255	0.635257
ENSMUSG00000038486	Sv2a	synaptic vesicle glycoprotein 2 a	313.736	563.844	0.557208	-0.843711	0.0198492	0.636357
ENSMUSG00000040003	Magi2	membrane associated guanylate kinase, WW and PDZ domain containing 2	282.783	510.026	0.55532	-0.848609	0.0198049	0.636357
ENSMUSG00000035769	Xylb	xylulokinase homolog (H. influenzae)	1918.28	4199	0.456972	-1.12982	0.0197228	0.636357
ENSMUSG00000019558	Slc6a8	solute carrier family 6 (neurotransmitter transporter, creatine), member 8	1384.47	2366.52	0.585202	-0.772995	0.0198758	0.636357
ENSMUSG00000034402	Kcnh5	potassium voltage-gated channel, subfamily H (eag-related), member 5	15.5867	57.98	0.281226	-1.8302	0.0200563	0.638514
ENSMUSG00000060969	Irx1	Iroquois related homeobox 1 (Drosophila)	435.843	846.986	0.515153	-0.956927	0.020127	0.638514
ENSMUSG00000087223	4930442L01Rik	RIKEN cDNA 4930442L01 gene	18.0056	62.8952	0.29745	-1.74928	0.0201817	0.638514
ENSMUSG00000061601	Pclo	piccolo (presynaptic cytomatrix protein)	1224.14	2056.51	0.595448	-0.747953	0.0200662	0.638514
ENSMUSG00000001827	Folr1	folate receptor 1 (adult)	1318.42	2453.91	0.537462	-0.895766	0.0201633	0.638514
ENSMUSG00000031004	Mki67	antigen identified by monoclonal antibody Ki 67	454.668	792.223	0.574451	-0.799743	0.0203022	0.640622
ENSMUSG00000038704	Aspdh	aspartate dehydrogenase domain containing	120.839	308.449	0.393728	-1.34473	0.0204001	0.640683
ENSMUSG00000022123	Scel	sciellin	224.383	413.151	0.544204	-0.877782	0.0204829	0.642278
ENSMUSG00000020051	Pah	phenylalanine hydroxylase	3755.65	7286.24	0.515511	-0.955924	0.0208816	0.65314
ENSMUSG00000026068	Il18rap	interleukin 18 receptor accessory protein	30.5991	108.055	0.289754	-1.7871	0.0210985	0.658491
ENSMUSG00000032842	Abcc10	ATP-binding cassette, sub-family C (CFTR/MRP), member 10	160.401	307.291	0.523535	-0.933643	0.0213625	0.6626
ENSMUSG00000033722	BC034090	cDNA sequence BC034090	1074.88	1795.54	0.598862	-0.739705	0.0215457	0.664116
ENSMUSG00000022534	Mefv	Mediterranean fever	31.8085	86.5715	0.374648	-1.41639	0.0218004	0.664782
ENSMUSG00000075391	Gm13443	predicted gene 13443	285.853	505.043	0.566856	-0.818947	0.0218014	0.664782
ENSMUSG00000028744	Pqlc2	PQ loop repeat containing 2	90.1454	189.035	0.479624	-1.06003	0.0218055	0.664782
ENSMUSG00000038227	Hoxa9	homeobox A9	231.87	417.898	0.555911	-0.847075	0.021831	0.664782
ENSMUSG00000073722	4931408C20Rik	RIKEN cDNA 4931408C20 gene	0.825867	17.4108	0.0991735	-3.3339	0.0221173	0.667574
ENSMUSG00000021707	Dhfr	dihydrofolate reductase	305.213	536.919	0.569255	-0.812853	0.0221558	0.667574
ENSMUSG00000064254	Ethe1	ethylmalonic encephalopathy 1	263.36	546.746	0.482632	-1.051	0.0222031	0.667993
ENSMUSG00000022425	Enpp2	ectonucleotide pyrophosphatase/phosphodiesterase 2	1983.9	3217.78	0.616663	-0.697446	0.0222778	0.669236
ENSMUSG00000040612	Ildr2	immunoglobulin-like domain containing receptor 2	757.596	1268.08	0.597753	-0.742378	0.0225289	0.670036
ENSMUSG00000037098	Rab11fip3	RAB11 family interacting protein 3 (class II)	5615.2	10737.1	0.523019	-0.935065	0.0225773	0.670036
ENSMUSG00000028601	Echdc2	enoyl Coenzyme A hydratase domain containing 2	422.742	741.721	0.570527	-0.809634	0.0225513	0.670036
ENSMUSG00000038060	Dlec1	deleted in lung and esophageal cancer 1	683.511	1155.92	0.591667	-0.757143	0.0225498	0.670036
ENSMUSG00000028167	Bdh2	3-hydroxybutyrate dehydrogenase, type 2	524.032	1060.34	0.494688	-1.01541	0.022674	0.670087
ENSMUSG00000029193	Cckar	cholecystokinin A receptor	89.4097	183.918	0.488917	-1.03234	0.0227487	0.671305
ENSMUSG00000031842	Pde4c	phosphodiesterase 4C, cAMP specific	714.89	1202.29	0.594943	-0.749177	0.022876	0.67308
ENSMUSG00000043085	Tmem82	transmembrane protein 82	62.4977	165.1	0.382285	-1.38728	0.0229534	0.674365
ENSMUSG00000032815	Fanca	Fanconi anemia, complementation group A	51.3024	122.405	0.423826	-1.23846	0.0231411	0.678885
ENSMUSG00000006342	Susd2	sushi domain containing 2	1097.77	1818.84	0.603773	-0.727922	0.0232394	0.679779
ENSMUSG00000025727	A930017K11Rik	RIKEN cDNA A930017K11 gene	35.4788	94.1856	0.383239	-1.38368	0.0233851	0.682049
ENSMUSG00000060961	Slc4a4	solute carrier family 4 (anion exchanger), member 4	10315.6	20174.4	0.511348	-0.967624	0.0233648	0.682049
ENSMUSG00000067889	Sptbn2	spectrin beta, non-erythrocytic 2	1833.49	3002.17	0.610853	-0.711103	0.0237857	0.687725
ENSMUSG00000086156	Gm15354	predicted gene 15354	0.825867	18.2768	0.0947182	-3.40021	0.0237837	0.687725
ENSMUSG00000048251	Bcl11b	B cell leukemia/lymphoma 11B	104.422	215.727	0.486429	-1.0397	0.023927	0.68966
ENSMUSG00000039653	Baat	bile acid-Coenzyme A: amino acid N-acyltransferase	37.5435	97.7623	0.390265	-1.35747	0.0239868	0.68966
ENSMUSG00000018930	Ccl4	chemokine (C-C motif) ligand 4	287.976	542.565	0.531632	-0.911501	0.0243923	0.695232
ENSMUSG00000020432	Tcn2	transcobalamin 2	7159.51	11532.5	0.620843	-0.687699	0.02481	0.701216
ENSMUSG00000020992	4930512B01Rik	RIKEN cDNA 4930512B01 gene	96.4128	192.556	0.503279	-0.990571	0.0248122	0.701216
ENSMUSG00000010122	Slc47a1	solute carrier family 47, member 1	1620.3	3213.35	0.504394	-0.987378	0.0251061	0.707525
ENSMUSG00000075025	Gm10804	predicted gene 10804	216.057	500.295	0.432992	-1.20759	0.0252326	0.709096
ENSMUSG00000033669	Zfp7	zinc finger protein 7	319.408	554.61	0.576677	-0.794164	0.0254154	0.713232
ENSMUSG00000030287	Itpr2	inositol 1,4,5-triphosphate receptor 2	4085.81	6470.34	0.631525	-0.663089	0.0256004	0.715419
ENSMUSG00000028518	Prkaa2	protein kinase, AMP-activated, alpha 2 catalytic subunit	1490.05	2409.86	0.618471	-0.693221	0.0259236	0.721433
ENSMUSG00000023132	Gzma	granzyme A	2.49228	50.9628	0.0672072	-3.89524	0.0260661	0.723388
ENSMUSG00000075478	Slitrk1	SLIT and NTRK-like family, member 1	13.5367	56.4616	0.252981	-1.9829	0.0261228	0.723855
ENSMUSG00000038072	Galnt11	UDP-N-acetyl-alpha-D-galactosamine:polypeptide N-acetylgalactosaminyltransferase 11	2600.32	4201.64	0.618972	-0.692055	0.0261913	0.723855
ENSMUSG00000035459	Stab2	stabilin 2	104.776	210.135	0.500988	-0.997153	0.0263505	0.726251
ENSMUSG00000026994	Galnt3	UDP-N-acetyl-alpha-D-galactosamine:polypeptide N-acetylgalactosaminyltransferase 3	313.266	551.214	0.569102	-0.81324	0.0270027	0.738851
ENSMUSG00000076281	Gm24270	predicted gene, 24270	50921.2	81594.1	0.624084	-0.680188	0.0270289	0.738851
ENSMUSG00000022211	Carmil3	capping protein regulator and myosin 1 linker 3	33.6217	85.6382	0.399612	-1.32333	0.0270859	0.739401
ENSMUSG00000024130	Abca3	ATP-binding cassette, sub-family A (ABC1), member 3	4238.46	6795.64	0.623759	-0.680939	0.0272043	0.740614
ENSMUSG00000028391	Wdr31	WD repeat domain 31	71.2553	147.398	0.486901	-1.0383	0.0273584	0.7438
ENSMUSG00000039154	Shd	src homology 2 domain-containing transforming protein D	81.9622	167.587	0.492103	-1.02297	0.027531	0.746468
ENSMUSG00000079495	Nat8f6	N-acetyltransferase 8 (GCN5-related) family member 6	47.7075	152.28	0.317768	-1.65395	0.0277279	0.75079
ENSMUSG00000014303	Glis2	GLIS family zinc finger 2	1188.32	1915.74	0.620491	-0.688517	0.0279303	0.75228
ENSMUSG00000015957	Wnt11	wingless-type MMTV integration site family, member 11	11.5161	43.3252	0.282369	-1.82435	0.0278919	0.75228
ENSMUSG00000018459	Slc13a3	solute carrier family 13 (sodium-dependent dicarboxylate transporter), member 3	2810.49	5439.37	0.516782	-0.952371	0.0282103	0.757707
ENSMUSG00000028572	Hook1	hook microtubule tethering protein 1	817.939	1334.57	0.613174	-0.705633	0.0282885	0.75879
ENSMUSG00000029456	Acad10	acyl-Coenzyme A dehydrogenase family, member 10	259.748	457.556	0.568629	-0.814441	0.0285972	0.764004
ENSMUSG00000026322	Htr4	5 hydroxytryptamine (serotonin) receptor 4	8.0952	35.3059	0.250516	-1.99703	0.0286889	0.765431
ENSMUSG00000026304	Rab17	RAB17, member RAS oncogene family	245.887	436.703	0.56405	-0.826104	0.0288877	0.768658
ENSMUSG00000026568	Mpc2	mitochondrial pyruvate carrier 2	1131.64	1797.93	0.629621	-0.667445	0.0292389	0.768658
ENSMUSG00000074768	Bhmt	betaine-homocysteine methyltransferase	76.3152	158.443	0.484909	-1.04421	0.0288947	0.768658
ENSMUSG00000045672	Col27a1	collagen, type XXVII, alpha 1	496.043	1425.52	0.348429	-1.52106	0.0292324	0.768658
ENSMUSG00000035139	Secisbp2	SECIS binding protein 2	551.607	920.836	0.599463	-0.738257	0.0296236	0.775552
ENSMUSG00000063455	D630045J12Rik	RIKEN cDNA D630045J12 gene	903.833	1672.6	0.54065	-0.887233	0.0297262	0.775552
ENSMUSG00000031465	Angpt2	angiopoietin 2	829.43	1344.67	0.617111	-0.696398	0.029681	0.775552
ENSMUSG00000044444	Pfn3	profilin 3	192.654	455.89	0.423852	-1.23837	0.0299023	0.776103
ENSMUSG00000018126	Baiap2l2	BAI1-associated protein 2-like 2	712.291	1180.99	0.603467	-0.728654	0.0298536	0.776103
ENSMUSG00000024665	Fads2	fatty acid desaturase 2	489.468	821.376	0.596403	-0.74564	0.0298575	0.776103
ENSMUSG00000046082	Tmem174	transmembrane protein 174	1223.97	2238.49	0.546986	-0.870425	0.0300617	0.779231
ENSMUSG00000000056	Narf	nuclear prelamin A recognition factor	527.03	860.283	0.613073	-0.705868	0.0305383	0.78751
ENSMUSG00000052595	A1cf	APOBEC1 complementation factor	662.055	1110.79	0.596383	-0.74569	0.030589	0.787803
ENSMUSG00000027016	Zfp385b	zinc finger protein 385B	85.8253	172.03	0.501794	-0.994832	0.0306987	0.788441
ENSMUSG00000006641	Slc5a6	solute carrier family 5 (sodium-dependent vitamin transporter), member 6	94.2454	182.412	0.519299	-0.945363	0.0308105	0.788441
ENSMUSG00000042515	Mum1l1	melanoma associated antigen (mutated) 1-like 1	53.5578	122.799	0.440697	-1.18214	0.0307387	0.788441
ENSMUSG00000027004	Frzb	frizzled-related protein	76.091	151.774	0.504609	-0.986761	0.0311366	0.791732
ENSMUSG00000005373	Mlxipl	MLX interacting protein-like	807.414	1899.94	0.42527	-1.23355	0.0311091	0.791732
ENSMUSG00000019982	Myb	myeloblastosis oncogene	0.412934	13.4407	0.0978441	-3.35337	0.0315841	0.798045
ENSMUSG00000028519	Dab1	disabled 1	60.8732	133.788	0.459041	-1.1233	0.0316698	0.799203
ENSMUSG00000060985	Tdrd5	tudor domain containing 5	17.6954	56.1471	0.327145	-1.612	0.0317888	0.800191
ENSMUSG00000034926	Dhcr24	24-dehydrocholesterol reductase	1741.28	2803.33	0.62128	-0.686684	0.0323354	0.80887
ENSMUSG00000029036	Atad3a	ATPase family, AAA domain containing 3A	574.972	949.641	0.605877	-0.722902	0.0323092	0.80887
ENSMUSG00000045034	Ankrd34b	ankyrin repeat domain 34B	10.8096	43.0999	0.267793	-1.90081	0.0325775	0.810221
ENSMUSG00000085412	Halr1	Hoxa adjacent long noncoding RNA 1	73.9257	164.414	0.452958	-1.14255	0.0324347	0.810221
ENSMUSG00000059851	Kmt5c	lysine methyltransferase 5C	292.439	508.191	0.576285	-0.795146	0.0325916	0.810221
ENSMUSG00000038967	Pdk2	pyruvate dehydrogenase kinase, isoenzyme 2	1624.68	2571.63	0.631913	-0.662202	0.0336334	0.816864
ENSMUSG00000078706	Gm53	predicted gene 53	415.366	696.439	0.596992	-0.744217	0.0335003	0.816864
ENSMUSG00000036106	Prr5	proline rich 5 (renal)	133.887	276.348	0.486345	-1.03995	0.0332017	0.816864
ENSMUSG00000002489	Tiam1	T cell lymphoma invasion and metastasis 1	370.176	611.4	0.606101	-0.722371	0.0330242	0.816864
ENSMUSG00000037847	Nmrk1	nicotinamide riboside kinase 1	293.196	508.586	0.577323	-0.792549	0.033138	0.816864
ENSMUSG00000033386	Frrs1	ferric-chelate reductase 1	293.873	498.261	0.590618	-0.759702	0.0334782	0.816864
ENSMUSG00000015653	Steap2	six transmembrane epithelial antigen of prostate 2	1339.81	2140.74	0.626036	-0.675682	0.03346	0.816864
ENSMUSG00000084128	Esrp2	epithelial splicing regulatory protein 2	358.593	611.881	0.586725	-0.769244	0.0334646	0.816864
ENSMUSG00000086296	D030055H07Rik	RIKEN cDNA D030055H07 gene	5.79575	31.1777	0.211194	-2.24336	0.0334503	0.816864
ENSMUSG00000029098	Acox3	acyl-Coenzyme A oxidase 3, pristanoyl	657.039	1066.91	0.616195	-0.698542	0.0340101	0.824014
ENSMUSG00000033965	Slc16a2	solute carrier family 16 (monocarboxylic acid transporters), member 2	1005.18	1620.66	0.620466	-0.688577	0.0342421	0.827636
ENSMUSG00000047787	Flrt1	fibronectin leucine rich transmembrane protein 1	1645.29	2620.54	0.627984	-0.6712	0.0342911	0.827819
ENSMUSG00000022012	Enox1	ecto-NOX disulfide-thiol exchanger 1	38.711	100.18	0.392477	-1.34932	0.0343872	0.828144
ENSMUSG00000030972	Acsm5	acyl-CoA synthetase medium-chain family member 5	504.63	1107.43	0.456167	-1.13237	0.0348776	0.834937
ENSMUSG00000055805	Fmnl1	formin-like 1	955.974	1605.22	0.595792	-0.74712	0.0350945	0.838127
ENSMUSG00000023951	Vegfa	vascular endothelial growth factor A	3182.56	4975.21	0.639755	-0.644408	0.0353144	0.83889
ENSMUSG00000004415	Col26a1	collagen, type XXVI, alpha 1	11.7823	65.2007	0.193083	-2.3727	0.0352701	0.83889
ENSMUSG00000048731	Ggnbp1	gametogenetin binding protein 1	168.244	309.078	0.545812	-0.873523	0.0354586	0.84081
ENSMUSG00000064358	mt-Co3	mitochondrially encoded cytochrome c oxidase III	18.5066	92.3292	0.209008	-2.25837	0.0355397	0.841735
ENSMUSG00000081752	Gm14680	predicted gene 14680	155.959	283.446	0.551806	-0.857766	0.0356601	0.843592
ENSMUSG00000090124	Ugt1a7c	UDP glucuronosyltransferase 1 family, polypeptide A7C	542.933	1007.71	0.539236	-0.891012	0.0359065	0.845192
ENSMUSG00000071669	Snx29	sorting nexin 29	1305.5	2505.88	0.521165	-0.940188	0.0360189	0.845576
ENSMUSG00000057315	Arhgap24	Rho GTPase activating protein 24	3703.12	5795.13	0.639068	-0.645959	0.036789	0.858139
ENSMUSG00000018012	Rac3	RAS-related C3 botulinum substrate 3	31.012	78.7321	0.401495	-1.31655	0.0368798	0.858189
ENSMUSG00000031881	Cdh16	cadherin 16	8342.26	13020.1	0.64075	-0.642168	0.036846	0.858189
ENSMUSG00000032013	Trim29	tripartite motif-containing 29	1.2388	17.7824	0.119197	-3.06858	0.0371463	0.85931
ENSMUSG00000075705	Msrb1	methionine sulfoxide reductase B1	275.892	474.629	0.582161	-0.780511	0.0374615	0.861787
ENSMUSG00000029254	Stap1	signal transducing adaptor family member 1	316.83	523.782	0.605641	-0.723466	0.0374314	0.861787
ENSMUSG00000010044	Zmynd10	zinc finger, MYND domain containing 10	83.9388	170.96	0.493944	-1.01758	0.0374179	0.861787
ENSMUSG00000043088	Il17re	interleukin 17 receptor E	85.2783	169.094	0.50724	-0.979261	0.0375112	0.861898
ENSMUSG00000035849	Krt222	keratin 222	9.18726	37.4314	0.265076	-1.91552	0.0383911	0.869426
ENSMUSG00000062248	Cks2	CDC28 protein kinase regulatory subunit 2	28.2996	91.9021	0.315382	-1.66483	0.0385587	0.869426
ENSMUSG00000086213	A330040F15Rik	RIKEN cDNA A330040F15 gene	35.9085	104.69	0.349214	-1.51782	0.0385998	0.869426
ENSMUSG00000050323	Ndufaf6	NADH dehydrogenase (ubiquinone) complex I, assembly factor 6	81.9182	166.158	0.496047	-1.01145	0.0387026	0.869426
ENSMUSG00000018770	Atp5g3	ATP synthase, H+ transporting, mitochondrial F0 complex, subunit C3 (subunit 9)	1537.16	2410.55	0.637831	-0.648753	0.038829	0.870952
ENSMUSG00000001436	Slc19a1	solute carrier family 19 (folate transporter), member 1	278.995	477.915	0.584644	-0.774369	0.0390641	0.873579
ENSMUSG00000036898	Zfp157	zinc finger protein 157	130.066	245.958	0.530722	-0.913972	0.0393731	0.87732
ENSMUSG00000030492	Slc7a9	solute carrier family 7 (cationic amino acid transporter, y+ system), member 9	696.035	1251.29	0.55661	-0.84526	0.0395589	0.87732
ENSMUSG00000029122	Evc	Ellis van Creveld gene syndrome	1901.22	3003.48	0.633126	-0.659435	0.0398133	0.878707
ENSMUSG00000037709	Fam13a	family with sequence similarity 13, member A	1784.32	2766.14	0.645186	-0.632212	0.0398196	0.878707
ENSMUSG00000020098	Pcbd1	pterin 4 alpha carbinolamine dehydratase/dimerization cofactor of hepatocyte nuclear factor 1 alpha (TCF1) 1	565.42	982.067	0.576177	-0.795417	0.0402319	0.88488
ENSMUSG00000029291	Rufy3	RUN and FYVE domain containing 3	1360.82	2145.16	0.634536	-0.656225	0.040203	0.88488
ENSMUSG00000066842	Hmcn1	hemicentin 1	53.7506	120.842	0.449359	-1.15406	0.0405329	0.887605
ENSMUSG00000022987	Zfp641	zinc finger protein 641	110.392	220.19	0.503603	-0.989641	0.0406253	0.888064
ENSMUSG00000036292	Gramd1c	GRAM domain containing 1C	68.763	141.38	0.489977	-1.02921	0.0408198	0.888064
ENSMUSG00000028716	Pdzk1ip1	PDZK1 interacting protein 1	2194.33	3444.71	0.637121	-0.65036	0.0408015	0.888064
ENSMUSG00000093245	Mir677	microRNA 677	5.86912	29.6256	0.224293	-2.15654	0.0410909	0.889135
ENSMUSG00000089673	Gm16546	predicted gene 16546	4.60097	33.1233	0.164139	-2.60701	0.0412515	0.889727
ENSMUSG00000050350	Gpr18	G protein-coupled receptor 18	67.8491	139.682	0.489396	-1.03093	0.0417266	0.896116
ENSMUSG00000025980	Hspd1	heat shock protein 1 (chaperonin)	1467.51	2277.68	0.644458	-0.633842	0.0420517	0.897926
ENSMUSG00000074570	Cass4	Cas scaffolding protein family member 4	14.1571	45.3162	0.327254	-1.61152	0.0420288	0.897926
ENSMUSG00000033257	Ttll4	tubulin tyrosine ligase-like family, member 4	580.875	916.385	0.634276	-0.656818	0.0424878	0.901516
ENSMUSG00000019822	Smpd2	sphingomyelin phosphodiesterase 2, neutral	235.278	404.288	0.582989	-0.77846	0.0424638	0.901516
ENSMUSG00000063434	Sorcs3	sortilin-related VPS10 domain containing receptor 3	34.152	80.1496	0.433175	-1.20698	0.0423653	0.901516
ENSMUSG00000022551	Cyc1	cytochrome c-1	1224.42	1887.32	0.648949	-0.623823	0.0428071	0.904773
ENSMUSG00000063931	Pepd	peptidase D	1176.2	1931.6	0.609128	-0.715183	0.0428857	0.90548
ENSMUSG00000005320	Fgfr4	fibroblast growth factor receptor 4	247.509	415.12	0.597205	-0.743703	0.0439628	0.907267
ENSMUSG00000021697	Depdc1b	DEP domain containing 1B	91.8873	179.778	0.513818	-0.960669	0.0440118	0.907267
ENSMUSG00000041078	Grid1	glutamate receptor, ionotropic, delta 1	5.42683	27.7137	0.223825	-2.15956	0.0433603	0.907267
ENSMUSG00000042359	Osbpl6	oxysterol binding protein-like 6	1169.54	1909.03	0.612839	-0.706421	0.0437078	0.907267
ENSMUSG00000030004	Nat8	N-acetyltransferase 8 (GCN5-related)	133.738	245.79	0.545964	-0.873122	0.0435497	0.907267
ENSMUSG00000090188	Gm7418	predicted pseudogene 7418	0.855216	13.9132	0.124401	-3.00693	0.0430794	0.907267
ENSMUSG00000048371	Pdp2	pyruvate dehyrogenase phosphatase catalytic subunit 2	824.38	1307.32	0.63087	-0.664584	0.0435736	0.907267
ENSMUSG00000038178	Slc43a2	solute carrier family 43, member 2	2913.7	4450.05	0.654834	-0.610799	0.0447246	0.908831
ENSMUSG00000004341	Gpx6	glutathione peroxidase 6	309.946	508.272	0.61057	-0.711772	0.0443829	0.908831
ENSMUSG00000056071	S100a9	S100 calcium binding protein A9 (calgranulin B)	6.38477	38.1292	0.188728	-2.40562	0.044768	0.908831
ENSMUSG00000086390	1810019D21Rik	RIKEN cDNA 1810019D21 gene	105.835	202.318	0.525457	-0.928355	0.0445361	0.908831
ENSMUSG00000072962	Gm16401	predicted gene 16401	23.5058	65.6059	0.367923	-1.44253	0.0448576	0.909708
ENSMUSG00000052698	Tln2	talin 2	3564.38	5500.78	0.648042	-0.62584	0.0449928	0.909708
ENSMUSG00000084781	D930015M05Rik	RIKEN cDNA D930015M05 gene	20.3365	57.272	0.366153	-1.44948	0.0453902	0.913136
ENSMUSG00000033429	Mcee	methylmalonyl CoA epimerase	384.811	617.035	0.624254	-0.679794	0.0455623	0.913527
ENSMUSG00000027199	Gatm	glycine amidinotransferase (L-arginine:glycine amidinotransferase)	5853.49	11242.9	0.520681	-0.941527	0.0458008	0.914984
ENSMUSG00000047719	Ubiad1	UbiA prenyltransferase domain containing 1	183.431	312.803	0.587729	-0.766778	0.0458017	0.914984
ENSMUSG00000073676	Hspe1	heat shock protein 1 (chaperonin 10)	777.346	1201.39	0.647333	-0.627419	0.0461803	0.917061
ENSMUSG00000023150	Ivns1abp	influenza virus NS1A binding protein	5304.13	7988.28	0.66403	-0.590679	0.0461313	0.917061
ENSMUSG00000026748	Plxdc2	plexin domain containing 2	1345.71	2110.34	0.637846	-0.64872	0.046155	0.917061
ENSMUSG00000015970	Chdh	choline dehydrogenase	2546.36	4431.8	0.574663	-0.799213	0.0465045	0.91804
ENSMUSG00000086549	Gm13648	predicted gene 13648	15.1297	47.4417	0.332972	-1.58653	0.0464867	0.91804
ENSMUSG00000041921	Metap1d	methionyl aminopeptidase type 1D (mitochondrial)	265.056	441.63	0.601079	-0.734374	0.0466384	0.918245
ENSMUSG00000026581	Sell	selectin, lymphocyte	10.0718	53.887	0.20172	-2.30957	0.0468065	0.918961
ENSMUSG00000028125	Abca4	ATP-binding cassette, sub-family A (ABC1), member 4	169.056	289.971	0.584443	-0.774866	0.047017	0.918961
ENSMUSG00000029082	Bst1	bone marrow stromal cell antigen 1	289.897	482.367	0.601813	-0.732613	0.0468068	0.918961
ENSMUSG00000033533	Acsm1	acyl-CoA synthetase medium-chain family member 1	905.118	1942.78	0.466163	-1.10109	0.0470556	0.918961
ENSMUSG00000090105	Gm15890	predicted gene 15890	34.2127	83.0621	0.41889	-1.25536	0.0468315	0.918961
ENSMUSG00000037710	Cisd1	CDGSH iron sulfur domain 1	857.58	1345.97	0.637416	-0.649692	0.0475551	0.921836
ENSMUSG00000020122	Egfr	epidermal growth factor receptor	818.199	1279.06	0.639971	-0.643922	0.0476377	0.921836
ENSMUSG00000038042	Ptpdc1	protein tyrosine phosphatase domain containing 1	359.995	588.307	0.612575	-0.707042	0.0479596	0.921836
ENSMUSG00000028064	Sema4a	sema domain, immunoglobulin domain (Ig), transmembrane domain (TM) and short cytoplasmic domain, (semaphorin) 4A	960.032	1497.35	0.641396	-0.640714	0.0473365	0.921836
ENSMUSG00000028699	Tspan1	tetraspanin 1	380.118	617.033	0.616662	-0.697448	0.0474699	0.921836
ENSMUSG00000030657	Xylt1	xylosyltransferase 1	286.442	506.864	0.565982	-0.821172	0.0479563	0.921836
ENSMUSG00000056228	Cars2	cysteinyl-tRNA synthetase 2 (mitochondrial)(putative)	140.932	256.474	0.551248	-0.859226	0.0476018	0.921836
ENSMUSG00000028261	Ndufaf4	NADH dehydrogenase (ubiquinone) 1 alpha subcomplex, assembly factor 4	362.366	582.482	0.622754	-0.683267	0.0483819	0.923814
ENSMUSG00000037541	Shank2	SH3/ankyrin domain gene 2	1941.16	2968.59	0.654018	-0.612598	0.0483206	0.923814
ENSMUSG00000063903	Klk1	kallikrein 1	21629	32677.4	0.661906	-0.595302	0.0487389	0.927856
ENSMUSG00000020321	Mdh1	malate dehydrogenase 1, NAD (soluble)	5480.47	8246.04	0.66466	-0.589312	0.0495021	0.932816
ENSMUSG00000034108	Ccs	copper chaperone for superoxide dismutase	279.55	453.362	0.617459	-0.695584	0.0494474	0.932816
ENSMUSG00000015093	Clic3	chloride intracellular channel 3	12.1658	43.4042	0.2965	-1.7539	0.0495342	0.932816
ENSMUSG00000014418	Hps5	Hermansky-Pudlak syndrome 5	894.252	1380.48	0.64804	-0.625844	0.0491246	0.932816
ENSMUSG00000030909	Anks4b	ankyrin repeat and sterile alpha motif domain containing 4B	505.584	966.571	0.523563	-0.933565	0.0494007	0.932816
ENSMUSG00000030873	Scnn1b	sodium channel, nonvoltage-gated 1 beta	580.156	922.95	0.628991	-0.668889	0.0493824	0.932816
ENSMUSG00000025137	Pcyt2	phosphate cytidylyltransferase 2, ethanolamine	727.684	1152.9	0.631496	-0.663156	0.0504956	0.936924
ENSMUSG00000045064	Zc2hc1c	zinc finger, C2HC-type containing 1C	179.643	306.436	0.587579	-0.767145	0.0503094	0.936924
ENSMUSG00000021336	Slc17a4	solute carrier family 17 (sodium phosphate), member 4	37.5435	89.3041	0.426819	-1.2283	0.0501242	0.936924
ENSMUSG00000021566	Slc6a19os	solute carrier family 6 (neurotransmitter transporter), member 19, opposite strand	9.64422	37.1388	0.279091	-1.84119	0.0502277	0.936924
ENSMUSG00000054733	Msra	methionine sulfoxide reductase A	839.462	1478.74	0.567979	-0.816091	0.0502245	0.936924
ENSMUSG00000024978	Gpam	glycerol-3-phosphate acyltransferase, mitochondrial	1344.27	2176.73	0.617738	-0.694934	0.0505499	0.936924
ENSMUSG00000083563	Gm13340	predicted gene 13340	76.2378	146.521	0.523573	-0.933538	0.0498798	0.936924
ENSMUSG00000027843	Ptpn22	protein tyrosine phosphatase, non-receptor type 22 (lymphoid)	141.081	253.023	0.559322	-0.838248	0.0503294	0.936924
ENSMUSG00000038422	Hdhd3	haloacid dehalogenase-like hydrolase domain containing 3	35.4075	83.8944	0.428856	-1.22143	0.050594	0.936924
ENSMUSG00000032047	Acat1	acetyl-Coenzyme A acetyltransferase 1	2523.72	3832.26	0.658635	-0.602448	0.0500943	0.936924
ENSMUSG00000062760	1810041L15Rik	RIKEN cDNA 1810041L15 gene	14.2599	44.6974	0.333933	-1.58237	0.0508508	0.939753
ENSMUSG00000034573	Ptpn13	protein tyrosine phosphatase, non-receptor type 13	2208.87	3322.81	0.664862	-0.588872	0.0507954	0.939753
ENSMUSG00000045871	Slitrk6	SLIT and NTRK-like family, member 6	4.60097	24.4632	0.219963	-2.18467	0.0510088	0.94026
ENSMUSG00000038298	Pdzk1	PDZ domain containing 1	2384.89	4629.7	0.515232	-0.956705	0.0512228	0.940744
ENSMUSG00000030739	Myh14	myosin, heavy polypeptide 14	382.142	609.183	0.627913	-0.671363	0.0511525	0.940744
ENSMUSG00000041144	Dnah7b	dynein, axonemal, heavy chain 7B	266.569	438.953	0.608176	-0.717438	0.0513483	0.941414
ENSMUSG00000034435	Tmem30b	transmembrane protein 30B	265.259	429.405	0.618624	-0.692865	0.0522304	0.948642
ENSMUSG00000029776	Hibadh	3-hydroxyisobutyrate dehydrogenase	1017.15	1554.92	0.654372	-0.611816	0.052088	0.948642
ENSMUSG00000031482	Slc25a15	solute carrier family 25 (mitochondrial carrier ornithine transporter), member 15	766.433	1251.59	0.612677	-0.706801	0.0523157	0.948642
ENSMUSG00000041444	Arhgap32	Rho GTPase activating protein 32	1477.11	2252.91	0.655798	-0.608676	0.0522129	0.948642
ENSMUSG00000085897	Gm11604	predicted gene 11604	0	12.3157	0.0750992	-3.73506	0.0526874	0.952763
ENSMUSG00000042942	Greb1l	growth regulation by estrogen in breast cancer-like	256.77	430.011	0.598059	-0.741641	0.0527126	0.952763
ENSMUSG00000019894	Slc6a15	solute carrier family 6 (neurotransmitter transporter), member 15	55.241	112.846	0.49401	-1.01739	0.0533526	0.956196
ENSMUSG00000058809	Hspd1-ps3	heat shock protein 1 (chaperonin), pseudogene 3	1307.64	1988.18	0.657876	-0.604112	0.0530777	0.956196
ENSMUSG00000021947	Cryl1	crystallin, lambda 1	781.097	1416.26	0.551837	-0.857687	0.0532972	0.956196
ENSMUSG00000027452	Acss1	acyl-CoA synthetase short-chain family member 1	4171.19	6272.45	0.665055	-0.588453	0.0531669	0.956196
ENSMUSG00000028222	Calb1	calbindin 1	3886.61	5808.45	0.669188	-0.579517	0.0533274	0.956196
ENSMUSG00000030815	Phkg2	phosphorylase kinase, gamma 2 (testis)	159.011	269.883	0.590703	-0.759496	0.0531372	0.956196
ENSMUSG00000039738	Slx4	SLX4 structure-specific endonuclease subunit homolog (S. cerevisiae)	901.884	1387.85	0.650093	-0.621281	0.0534057	0.956291
ENSMUSG00000026348	Acmsd	amino carboxymuconate semialdehyde decarboxylase	933.571	1861.38	0.501816	-0.99477	0.0536477	0.958911
ENSMUSG00000028773	Fabp3	fatty acid binding protein 3, muscle and heart	169.97	288.339	0.590896	-0.759023	0.0537021	0.959027
ENSMUSG00000020607	Fam84a	family with sequence similarity 84, member A	225.649	377.452	0.598884	-0.739652	0.0537916	0.959511
ENSMUSG00000050199	Lgr4	leucine-rich repeat-containing G protein-coupled receptor 4	2283.62	3394.25	0.672886	-0.571566	0.0543071	0.962254
ENSMUSG00000035936	Aldh5a1	aldhehyde dehydrogenase family 5, subfamily A1	380.195	610.813	0.623058	-0.682561	0.05498	0.965499
ENSMUSG00000024575	Pde6a	phosphodiesterase 6A, cGMP-specific, rod, alpha	29.2135	71.7923	0.415065	-1.26859	0.0549443	0.965499
ENSMUSG00000052951	C130021I20Rik	Riken cDNA C130021I20 gene	0	8.99799	0.10002	-3.32164	0.0549007	0.965499
ENSMUSG00000025479	Cyp2e1	cytochrome P450, family 2, subfamily e, polypeptide 1	349.854	613.11	0.571321	-0.807627	0.0551236	0.966672
ENSMUSG00000020120	Plek	pleckstrin	1195.65	1778.03	0.672644	-0.572086	0.0552752	0.967724
ENSMUSG00000063851	Rnf183	ring finger protein 183	171.55	309.63	0.555485	-0.848181	0.0554984	0.969357
ENSMUSG00000025243	Slc6a20b	solute carrier family 6 (neurotransmitter transporter), member 20B	594.428	1088.18	0.546673	-0.87125	0.0557503	0.971364
ENSMUSG00000087047	1700110K17Rik	RIKEN cDNA 1700110K17 gene	10.4554	36.7117	0.303763	-1.71898	0.055825	0.97182
ENSMUSG00000068205	Macrod2	MACRO domain containing 2	418.204	707.743	0.591475	-0.757611	0.0561183	0.974388
ENSMUSG00000042096	Dao	D-amino acid oxidase	1086.34	2142.09	0.507368	-0.978896	0.0561181	0.974388
ENSMUSG00000046314	Stxbp6	syntaxin binding protein 6 (amisyn)	250.201	415.558	0.603039	-0.729677	0.0562025	0.975004
ENSMUSG00000044816	D630023F18Rik	RIKEN cDNA D630023F18 gene	414.278	918.78	0.451497	-1.14721	0.0563281	0.975494
ENSMUSG00000087165	2010001A14Rik	RIKEN cDNA 2010001A14 gene	6.29672	34.3155	0.206615	-2.27498	0.0563016	0.975494
ENSMUSG00000032902	Slc16a1	solute carrier family 16 (monocarboxylic acid transporters), member 1	307.313	488.836	0.629421	-0.667902	0.0566073	0.975815
ENSMUSG00000000154	Slc22a18	solute carrier family 22 (organic cation transporter), member 18	670.938	1185.97	0.566094	-0.820887	0.0564879	0.975815
ENSMUSG00000092758	Gm25026	predicted gene, 25026	1.65173	16.1513	0.154608	-2.69331	0.056869	0.976422
ENSMUSG00000053687	Dpep2	dipeptidase 2	19.5253	53.808	0.374494	-1.41699	0.0567447	0.976422
ENSMUSG00000003531	Dgcr6	DiGeorge syndrome critical region gene 6	260.84	427.031	0.611732	-0.709028	0.0575247	0.985277
ENSMUSG00000024388	Myo7b	myosin VIIB	913.96	1663.12	0.549817	-0.862977	0.0575323	0.985277
ENSMUSG00000030340	Scnn1a	sodium channel, nonvoltage-gated 1 alpha	2401.77	3664.75	0.655464	-0.609411	0.057898	0.989152
ENSMUSG00000058743	Kcnj14	potassium inwardly-rectifying channel, subfamily J, member 14	0.825867	12.9009	0.131349	-2.92852	0.05796	0.98922
ENSMUSG00000023806	Rsph3b	radial spoke 3B homolog (Chlamydomonas)	111.733	199.664	0.5618	-0.831871	0.0580845	0.990502
ENSMUSG00000025203	Scd2	stearoyl-Coenzyme A desaturase 2	1305.27	1957.55	0.666958	-0.584331	0.0581448	0.990686
ENSMUSG00000047502	Mroh7	maestro heat-like repeat family member 7	71.4921	143.64	0.501189	-0.996572	0.058534	0.993115
ENSMUSG00000040370	Lyrm5	LYR motif containing 5	270.231	444.643	0.608627	-0.716369	0.0586953	0.99499
ENSMUSG00000060981	Hist1h4h	histone cluster 1, H4h	284.824	465.091	0.613236	-0.705485	0.0590937	0.995839
ENSMUSG00000058914	C1qtnf3	C1q and tumor necrosis factor related protein 3	94.4969	169.691	0.559474	-0.837857	0.0588758	0.995839
ENSMUSG00000013539	Tango2	transport and golgi organization 2	330.708	524.457	0.631275	-0.663658	0.0590819	0.995839
ENSMUSG00000070868	Skint3	selection and upkeep of intraepithelial T cells 3	8.37607	31.7629	0.28618	-1.80501	0.0591194	0.995839
ENSMUSG00000003438	Timm50	translocase of inner mitochondrial membrane 50	170.559	281.131	0.608082	-0.717661	0.0590196	0.995839
ENSMUSG00000059493	Nhs	Nance-Horan syndrome (human)	549.49	846.932	0.649215	-0.623233	0.0589739	0.995839
ENSMUSG00000022629	Kif21a	kinesin family member 21A	1934.57	2946.51	0.656678	-0.606743	0.059405	0.997736
ENSMUSG00000024953	Prdx5	peroxiredoxin 5	3963.93	5938.52	0.667551	-0.583051	0.0594718	0.998021
ENSMUSG00000025900	Rp1	retinitis pigmentosa 1 (human)	22.2523	22.7312	0.97982	-0.0294113	0.92931	1
ENSMUSG00000033845	Mrpl15	mitochondrial ribosomal protein L15	320.957	389.509	0.824455	-0.278487	0.489547	1
ENSMUSG00000025903	Lypla1	lysophospholipase 1	757.562	1016.91	0.745212	-0.424277	0.17786	1
ENSMUSG00000062588	Gm6104	predicted gene 6104	175.057	192.994	0.907539	-0.139969	0.828116	1
ENSMUSG00000002459	Rgs20	regulator of G-protein signaling 20	8.87705	10.8763	0.831661	-0.265933	0.850967	1
ENSMUSG00000033793	Atp6v1h	ATPase, H+ transporting, lysosomal V1 subunit H	831.126	1025.27	0.810825	-0.302538	0.343273	1
ENSMUSG00000025907	Rb1cc1	RB1-inducible coiled-coil 1	1784.55	1814.98	0.983245	-0.0243768	0.915684	1
ENSMUSG00000090031	4732440D04Rik	RIKEN cDNA 4732440D04 gene	59.7832	98.1221	0.613216	-0.705534	0.234409	1
ENSMUSG00000051285	Pcmtd1	protein-L-isoaspartate (D-aspartate) O-methyltransferase domain containing 1	2062.16	2077.68	0.992536	-0.0108085	0.964712	1
ENSMUSG00000084353	Gm15452	predicted gene 15452	26.8973	52.0307	0.52606	-0.9267	0.193079	1
ENSMUSG00000061024	Rrs1	ribosome biogenesis regulator 1	324.717	326.4	0.994861	-0.00743353	0.990792	1
ENSMUSG00000025911	Adhfe1	alcohol dehydrogenase, iron containing, 1	635.707	741.645	0.857351	-0.222043	0.66726	1
ENSMUSG00000079671	2610203C22Rik	RIKEN cDNA 2610203C22 gene	64.1347	76.7865	0.837353	-0.256092	0.70286	1
ENSMUSG00000081441	Gm6161	predicted gene 6161	9.67356	15.1727	0.659975	-0.599517	0.672907	1
ENSMUSG00000067879	3110035E14Rik	RIKEN cDNA 3110035E14 gene	10.3527	24.0697	0.452844	-1.14291	0.294261	1
ENSMUSG00000025915	Sgk3	serum/glucocorticoid regulated kinase 3	406.577	456.939	0.890024	-0.168083	0.600241	1
ENSMUSG00000046334	Gm6195	predicted pseudogene 6195	19.3912	37.5104	0.529497	-0.917305	0.234537	1
ENSMUSG00000025917	Cops5	COP9 signalosome subunit 5	401.653	476.825	0.842679	-0.246945	0.435977	1
ENSMUSG00000056763	Cspp1	centrosome and spindle pole associated protein 1	875.467	1104.25	0.793004	-0.334599	0.31494	1
ENSMUSG00000067851	Arfgef1	ADP-ribosylation factor guanine nucleotide-exchange factor 1(brefeldin A-inhibited)	2712.87	2908.01	0.932918	-0.100178	0.747169	1
ENSMUSG00000088153	Gm26348	predicted gene, 26348	3.80445	4.76889	0.83282	-0.263923	0.951089	1
ENSMUSG00000042414	Prdm14	PR domain containing 14	2.13804	3.03688	0.777343	-0.363377	0.862301	1
ENSMUSG00000025937	Lactb2	lactamase, beta 2	2402.4	3945.2	0.609041	-0.71539	0.18186	1
ENSMUSG00000067813	Xkr9	X-linked Kx blood group related 9	0.825867	5.09511	0.299563	-1.73907	0.435517	1
ENSMUSG00000025932	Eya1	EYA transcriptional coactivator and phosphatase 1	10.1012	13.407	0.770539	-0.37606	0.739371	1
ENSMUSG00000032719	Sbspon	somatomedin B and thrombospondin, type 1 domain containing	16.7962	46.4177	0.375306	-1.41386	0.125688	1
ENSMUSG00000067795	4930444P10Rik	RIKEN cDNA 4930444P10 gene	2.4776	2.7443	0.928771	-0.106605	1	1
ENSMUSG00000025921	Rdh10	retinol dehydrogenase 10 (all-trans)	324.137	408.529	0.793929	-0.332918	0.366942	1
ENSMUSG00000025920	Stau2	staufen (RNA binding protein) homolog 2 (Drosophila)	240.898	329.527	0.731854	-0.450372	0.225068	1
ENSMUSG00000089982	Gm7568	predicted gene 7568	5.41216	6.5009	0.854852	-0.226254	1	1
ENSMUSG00000025940	Tmem70	transmembrane protein 70	385.519	415.48	0.928061	-0.107708	0.75807	1
ENSMUSG00000025779	Ly96	lymphocyte antigen 96	41.3353	42.841	0.965656	-0.0504189	0.960666	1
ENSMUSG00000060128	Gm2710	predicted gene 2710	18.1524	23.4846	0.78222	-0.354353	0.730581	1
ENSMUSG00000025927	Tfap2b	transcription factor AP-2 beta	1359.68	1700.59	0.799655	-0.322551	0.315371	1
ENSMUSG00000043760	Pkhd1	polycystic kidney and hepatic disease 1	6587.95	8422.16	0.782243	-0.354312	0.261007	1
ENSMUSG00000090142	Gm15795	predicted gene 15795	15.0857	22.8994	0.673059	-0.571196	0.688103	1
ENSMUSG00000070175	Gm24162	predicted gene, 24162	3.36217	7.29962	0.525586	-0.928001	0.594745	1
ENSMUSG00000041872	Il17f	interleukin 17F	4.54227	6.17469	0.772476	-0.372438	0.994409	1
ENSMUSG00000025934	Gsta3	glutathione S-transferase, alpha 3	620.357	811.073	0.765149	-0.386187	0.505608	1
ENSMUSG00000025936	Gm4956	predicted gene 4956	2.5363	4.40903	0.653777	-0.61313	0.779198	1
ENSMUSG00000082935	Gm7658	predicted gene 7658	251.397	271.075	0.927676	-0.108307	0.732409	1
ENSMUSG00000026155	Smap1	small ArfGAP 1	604.49	640.496	0.943872	-0.0833374	0.816479	1
ENSMUSG00000026153	Fam135a	family with sequence similarity 135, member A	682.4	897.368	0.760713	-0.394576	0.18368	1
ENSMUSG00000081557	Gm5697	predicted gene 5697	10.0278	16.1177	0.644234	-0.634342	0.56061	1
ENSMUSG00000048874	Phf3	PHD finger protein 3	2743.23	2764.75	0.992217	-0.0112724	0.972929	1
ENSMUSG00000070960	Gm19680	predicted gene, 19680	13.8176	15.7915	0.882447	-0.180419	0.861916	1
ENSMUSG00000042182	Bend6	BEN domain containing 6	23.4324	26.9486	0.874191	-0.193979	0.921547	1
ENSMUSG00000026131	Dst	dystonin	31330.4	32530.8	0.9631	-0.0542423	0.881026	1
ENSMUSG00000042111	Ccdc115	coiled-coil domain containing 115	220.354	247.883	0.88939	-0.169112	0.604962	1
ENSMUSG00000026127	Imp4	IMP4, U3 small nucleolar ribonucleoprotein	290.182	296.28	0.979487	-0.0299018	0.936269	1
ENSMUSG00000026126	Ptpn18	protein tyrosine phosphatase, non-receptor type 18	279.86	349.92	0.800355	-0.321287	0.353682	1
ENSMUSG00000026123	Plekhb2	pleckstrin homology domain containing, family B (evectins) member 2	1666.15	2354.1	0.70789	-0.498403	0.124236	1
ENSMUSG00000045216	Hs6st1	heparan sulfate 6-O-sulfotransferase 1	1804.92	1913.81	0.943131	-0.0844697	0.818969	1
ENSMUSG00000010453	Kansl3	KAT8 regulatory NSL complex subunit 3	1767.14	1867.81	0.94613	-0.0798894	0.809295	1
ENSMUSG00000037432	Fer1l5	fer-1-like 5 (C. elegans)	111.819	130.684	0.856745	-0.223063	0.650213	1
ENSMUSG00000001143	Lman2l	lectin, mannose-binding 2-like	340.271	459.964	0.740341	-0.433738	0.211267	1
ENSMUSG00000037408	Cnnm4	cyclin M4	320.997	330.494	0.971349	-0.0419384	0.905519	1
ENSMUSG00000001138	Cnnm3	cyclin M3	360.389	379.926	0.948713	-0.0759567	0.913927	1
ENSMUSG00000067653	Ankrd23	ankyrin repeat domain 23	61.8458	76.8874	0.806881	-0.309573	0.594337	1
ENSMUSG00000061518	Cox5b	cytochrome c oxidase subunit Vb	337.975	410.688	0.823379	-0.280371	0.470279	1
ENSMUSG00000037351	Actr1b	ARP1 actin-related protein 1B, centractin beta	1083.62	1161.13	0.933305	-0.0995788	0.772529	1
ENSMUSG00000026117	Zap70	zeta-chain (TCR) associated protein kinase	28.1802	28.6251	0.984982	-0.0218308	0.879729	1
ENSMUSG00000080054	Rpl12-ps1	ribosomal protein L12, pseudogene 1	10.9124	16.9837	0.662398	-0.594229	0.587525	1
ENSMUSG00000026112	Coa5	cytochrome C oxidase assembly factor 5	829.166	970.001	0.854958	-0.226074	0.470193	1
ENSMUSG00000026110	Mgat4a	mannoside acetylglucosaminyltransferase 4, isoenzyme A	536.158	749.484	0.715749	-0.482474	0.146673	1
ENSMUSG00000026090	2010300C02Rik	RIKEN cDNA 2010300C02 gene	23.357	31.1441	0.757745	-0.400216	0.647474	1
ENSMUSG00000037216	Lipt1	lipoyltransferase 1	51.8327	66.2028	0.786169	-0.347089	0.504506	1
ENSMUSG00000026087	Mrpl30	mitochondrial ribosomal protein L30	385.033	493.313	0.780949	-0.3567	0.301803	1
ENSMUSG00000037138	Aff3	AF4/FMR2 family, member 3	46.7161	60.2416	0.779144	-0.360037	0.499984	1
ENSMUSG00000003134	Tbc1d8	TBC1 domain family, member 8	350.082	350.313	0.999343	-0.000948131	0.95552	1
ENSMUSG00000003135	Cnot11	CCR4-NOT transcription complex, subunit 11	315.882	344.868	0.916193	-0.126276	0.746968	1
ENSMUSG00000077704	Snord89	small nucleolar RNA, C/D box 89	7.13727	16.9837	0.45248	-1.14407	0.33284	1
ENSMUSG00000048234	Rnf149	ring finger protein 149	688.856	822.569	0.837642	-0.255595	0.437607	1
ENSMUSG00000070942	Il1rl2	interleukin 1 receptor-like 2	18.123	18.3222	0.989691	-0.0149505	0.9512	1
ENSMUSG00000026069	Il1rl1	interleukin 1 receptor-like 1	85.7414	118.481	0.725987	-0.461984	0.658329	1
ENSMUSG00000026062	Slc9a2	solute carrier family 9 (sodium/hydrogen exchanger), member 2	316.913	445.948	0.711298	-0.491474	0.189085	1
ENSMUSG00000060424	Pantr1	POU domain, class 3, transcription factor 3 adjacent noncoding transcript 1	49.3865	94.051	0.5301	-0.915665	0.107814	1
ENSMUSG00000045515	Pou3f3	POU domain, class 3, transcription factor 3	1260.55	1636.18	0.770563	-0.376015	0.23827	1
ENSMUSG00000060679	Mrps9	mitochondrial ribosomal protein S9	484.039	650.842	0.744104	-0.426424	0.229824	1
ENSMUSG00000070939	Tgfbrap1	transforming growth factor, beta receptor associated protein 1	926.438	1063.21	0.87148	-0.19846	0.504535	1
ENSMUSG00000041878	8430432A02Rik	RIKEN cDNA 8430432A02 gene	7.12259	8.78442	0.830156	-0.268546	0.787741	1
ENSMUSG00000010290	AI597479	expressed sequence AI597479	209.72	242.911	0.863925	-0.211023	0.595385	1
ENSMUSG00000026049	Tex30	testis expressed 30	34.3888	35.2152	0.977182	-0.0333002	0.915943	1
ENSMUSG00000026047	Kdelc1	KDEL (Lys-Asp-Glu-Leu) containing 1	130.871	146.475	0.89419	-0.161346	0.723586	1
ENSMUSG00000041684	Bivm	basic, immunoglobulin-like variable motif containing	179.951	234.587	0.768087	-0.380658	0.386702	1
ENSMUSG00000026048	Ercc5	excision repair cross-complementing rodent repair deficiency, complementation group 5	490.717	504.199	0.973313	-0.0390241	0.93899	1
ENSMUSG00000089877	Gm16102	predicted gene 16102	5.44151	5.45497	0.997915	-0.00301106	1	1
ENSMUSG00000081185	Gm4852	predicted pseudogene 4852	2.4776	4.04917	0.688747	-0.537954	0.778705	1
ENSMUSG00000026107	Nabp1	nucleic acid binding protein 1	1787.05	2186.83	0.817271	-0.291113	0.4067	1
ENSMUSG00000072324	Gm8420	predicted gene 8420	2.13804	5.56761	0.477805	-1.06551	0.57909	1
ENSMUSG00000026103	Gls	glutaminase	3624.03	3702.42	0.978836	-0.0308616	0.917633	1
ENSMUSG00000041426	Hibch	3-hydroxyisobutyryl-Coenzyme A hydrolase	392.853	471.278	0.833945	-0.261976	0.571344	1
ENSMUSG00000026098	Pms1	postmeiotic segregation increased 1 (S. cerevisiae)	95.3648	126.737	0.7544	-0.406598	0.368205	1
ENSMUSG00000026097	Ormdl1	ORM1-like 1 (S. cerevisiae)	76.9609	110.058	0.701986	-0.510485	0.517309	1
ENSMUSG00000026095	Asnsd1	asparagine synthetase domain containing 1	392.214	490.58	0.799899	-0.322111	0.333264	1
ENSMUSG00000026094	Stk17b	serine/threonine kinase 17b (apoptosis-inducing)	368.346	588.332	0.626719	-0.674109	0.120977	1
ENSMUSG00000073678	Pgap1	post-GPI attachment to proteins 1	69.352	104.241	0.668483	-0.581037	0.266358	1
ENSMUSG00000089245	Gm24053	predicted gene, 24053	2.07934	6.64719	0.402676	-1.31231	0.529348	1
ENSMUSG00000046994	Mars2	methionine-tRNA synthetase 2 (mitochondrial)	73.7015	82.3087	0.896682	-0.157331	0.768279	1
ENSMUSG00000087022	9130024F11Rik	RIKEN cDNA 9130024F11 gene	1.26815	5.06147	0.374192	-1.41815	0.47976	1
ENSMUSG00000038323	1700066M21Rik	RIKEN cDNA 1700066M21 gene	49.5626	66.8552	0.745155	-0.424389	0.42149	1
ENSMUSG00000048495	Tyw5	tRNA-yW synthesizing protein 5	61.0346	71.2861	0.858182	-0.220645	0.718216	1
ENSMUSG00000025971	9430016H08Rik	RIKEN cDNA 9430016H08 gene	97.7837	102.104	0.958097	-0.0617557	0.932939	1
ENSMUSG00000054770	Kctd18	potassium channel tetramerisation domain containing 18	138.585	144.035	0.962419	-0.0552633	0.826942	1
ENSMUSG00000064294	Aox3	aldehyde oxidase 3	15.4546	29.2321	0.544276	-0.877589	0.333362	1
ENSMUSG00000026034	Clk1	CDC-like kinase 1	3768.58	4312.64	0.873875	-0.194501	0.493635	1
ENSMUSG00000026035	Ppil3	peptidylprolyl isomerase (cyclophilin)-like 3	53.1155	94.917	0.564191	-0.825744	0.140235	1
ENSMUSG00000026036	Nif3l1	Ngg1 interacting factor 3-like 1 (S. pombe)	165.159	176.911	0.933944	-0.0985927	0.771407	1
ENSMUSG00000026037	Orc2	origin recognition complex, subunit 2	168.727	207.864	0.812619	-0.299348	0.472815	1
ENSMUSG00000038174	Fam126b	family with sequence similarity 126, member B	548.056	569.413	0.962559	-0.0550535	0.847313	1
ENSMUSG00000026032	Ndufb3	NADH dehydrogenase (ubiquinone) 1 beta subcomplex 3	303.66	399.88	0.759977	-0.395973	0.262145	1
ENSMUSG00000047528	Als2cr12	amyotrophic lateral sclerosis 2 (juvenile) chromosome region, candidate 12 (human)	15.8676	34.3945	0.476559	-1.06927	0.240148	1
ENSMUSG00000026028	Trak2	trafficking protein, kinesin binding 2	3411.41	3818.05	0.893523	-0.162423	0.634054	1
ENSMUSG00000026027	Stradb	STE20-related kinase adaptor beta	178.079	272.222	0.655436	-0.609473	0.122656	1
ENSMUSG00000038079	Tmem237	transmembrane protein 237	181.63	197.357	0.920713	-0.119176	0.887927	1
ENSMUSG00000079550	Mpp4	membrane protein, palmitoylated 4 (MAGUK p55 subfamily member 4)	3.39151	21.6736	0.193684	-2.36822	0.0611003	1
ENSMUSG00000026024	Als2	amyotrophic lateral sclerosis 2 (juvenile)	757.265	845.086	0.896204	-0.158102	0.662127	1
ENSMUSG00000077358	Gm26293	predicted gene, 26293	1.66641	3.72296	0.564564	-0.824792	0.723192	1
ENSMUSG00000089093	Snord11	small nucleolar RNA, C/D box 11	1.71043	7.83941	0.30663	-1.70543	0.368694	1
ENSMUSG00000026019	Wdr12	WD repeat domain 12	75.6781	122.17	0.622539	-0.683764	0.157304	1
ENSMUSG00000026017	Carf	calcium response factor	89.1121	100.113	0.891201	-0.166177	0.794688	1
ENSMUSG00000026012	Cd28	CD28 antigen	17.6367	46.88	0.389238	-1.36128	0.274933	1
ENSMUSG00000026011	Ctla4	cytotoxic T-lymphocyte-associated protein 4	5.83977	10.3365	0.60334	-0.728956	0.586272	1
ENSMUSG00000081382	Rpl18-ps1	ribosomal protein L18, pseudogene 1	252.588	293.231	0.861866	-0.214464	0.599961	1
ENSMUSG00000026009	Icos	inducible T cell co-stimulator	26.1469	64.01	0.41758	-1.25987	0.309416	1
ENSMUSG00000052062	Pard3b	par-3 family cell polarity regulator beta	832.629	838.048	0.993541	-0.00934793	0.905256	1
ENSMUSG00000085019	Pard3bos2	par-3 family cell polarity regulator beta, opposite strand 2	3.36217	5.78118	0.643275	-0.636492	0.763106	1
ENSMUSG00000025968	Ndufs1	NADH dehydrogenase (ubiquinone) Fe-S protein 1	2013.51	2809.9	0.716678	-0.480603	0.125265	1
ENSMUSG00000025967	Eef1b2	eukaryotic translation elongation factor 1 beta 2	1748.34	1790.85	0.976276	-0.0346393	0.912838	1
ENSMUSG00000064602	Snora41	small nucleolar RNA, H/ACA box 41	29.9493	34.3155	0.876365	-0.190397	0.932541	1
ENSMUSG00000081643	Gm11605	predicted gene 11605	237.85	316.615	0.752012	-0.411173	0.296212	1
ENSMUSG00000025962	Fastkd2	FAST kinase domains 2	150.679	196.347	0.768592	-0.37971	0.353717	1
ENSMUSG00000025961	4933402D24Rik	RIKEN cDNA 4933402D24 gene	7.52085	8.49185	0.897702	-0.155691	0.931927	1
ENSMUSG00000087213	2810408I11Rik	RIKEN cDNA 2810408I11 gene	7.10792	8.85171	0.822996	-0.281042	0.895991	1
ENSMUSG00000084416	Rpl10a-ps1	ribosomal protein L10A, pseudogene 1	1374.98	1451.9	0.947056	-0.0784789	0.774607	1
ENSMUSG00000025950	Idh1	isocitrate dehydrogenase 1 (NADP+), soluble	3553.47	5784.61	0.614364	-0.702834	0.129015	1
ENSMUSG00000073656	Gm10558	predicted gene 10558	2.4776	7.15334	0.426525	-1.2293	0.536489	1
ENSMUSG00000026005	Rpe	ribulose-5-phosphate-3-epimerase	223.188	233.316	0.956777	-0.0637461	0.951917	1
ENSMUSG00000026004	Kansl1l	KAT8 regulatory NSL complex subunit 1-like	1033.18	1385.68	0.745798	-0.423143	0.185635	1
ENSMUSG00000062209	Erbb4	erb-b2 receptor tyrosine kinase 4	982.431	1345.67	0.730267	-0.453505	0.164428	1
ENSMUSG00000083795	Gm15670	predicted gene 15670	11.7529	31.6502	0.390592	-1.35627	0.151816	1
ENSMUSG00000087514	Gm16076	predicted gene 16076	48.9883	60.05	0.818808	-0.288402	0.662281	1
ENSMUSG00000025997	Ikzf2	IKAROS family zinc finger 2	226.55	248.816	0.91087	-0.134683	0.690187	1
ENSMUSG00000039395	Mreg	melanoregulin	42.5574	63.7057	0.673162	-0.570974	0.337657	1
ENSMUSG00000026188	Tmem169	transmembrane protein 169	38.0025	51.8171	0.738445	-0.437437	0.498528	1
ENSMUSG00000026187	Xrcc5	X-ray repair complementing defective repair in Chinese hamster cells 5	431.778	563.528	0.76662	-0.383416	0.318007	1
ENSMUSG00000046330	Rpl37a	ribosomal protein L37a	38.7823	40.7609	0.952622	-0.0700247	0.882164	1
ENSMUSG00000055322	Tns1	tensin 1	28758.7	29056.6	0.989746	-0.0148693	0.998265	1
ENSMUSG00000061815	Rufy4	RUN and FYVE domain containing 4	73.1585	135.475	0.543387	-0.879947	0.10987	1
ENSMUSG00000026180	Cxcr2	chemokine (C-X-C motif) receptor 2	3.33282	14.453	0.280388	-1.83451	0.191283	1
ENSMUSG00000006299	Aamp	angio-associated migratory protein	1764.15	1992.59	0.885414	-0.175576	0.594399	1
ENSMUSG00000026179	Pnkd	paroxysmal nonkinesiogenic dyskinesia	475.832	479.635	0.992089	-0.0114589	0.987734	1
ENSMUSG00000026176	Ctdsp1	CTD (carboxy-terminal domain, RNA polymerase II, polypeptide A) small phosphatase 1	1434.57	1440.34	0.995991	-0.00579568	0.997848	1
ENSMUSG00000065468	Mir26b	microRNA 26b	1.65173	3.39674	0.603114	-0.729497	0.797302	1
ENSMUSG00000026175	Vil1	villin 1	978.429	1408.42	0.694914	-0.525093	0.346399	1
ENSMUSG00000026174	Cnot9	CCR4-NOT transcription complex, subunit 9	306.693	333.622	0.919524	-0.121041	0.689912	1
ENSMUSG00000026173	Plcd4	phospholipase C, delta 4	60.2088	86.2672	0.701395	-0.511701	0.433979	1
ENSMUSG00000026172	Bcs1l	BCS1-like (yeast)	123.073	129.942	0.947543	-0.077736	0.803287	1
ENSMUSG00000026171	Rnf25	ring finger protein 25	265.492	290.275	0.914915	-0.128291	0.64935	1
ENSMUSG00000033276	Stk36	serine/threonine kinase 36	57.7773	85.0077	0.683395	-0.549207	0.38319	1
ENSMUSG00000026170	Cyp27a1	cytochrome P450, family 27, subfamily a, polypeptide 1	391.885	550.83	0.711967	-0.490118	0.418044	1
ENSMUSG00000006542	Prkag3	protein kinase, AMP-activated, gamma 3 non-catatlytic subunit	51.4092	83.7818	0.618166	-0.693934	0.479334	1
ENSMUSG00000047021	Ccdc108	coiled-coil domain containing 108	17.6514	22.3041	0.800348	-0.321301	0.719176	1
ENSMUSG00000006538	Ihh	Indian hedgehog	95.8972	152.403	0.631652	-0.662797	0.161554	1
ENSMUSG00000033159	Cnppd1	cyclin Pas1/PHO80 domain containing 1	509.358	617.709	0.824875	-0.277752	0.406668	1
ENSMUSG00000049339	Fam134a	family with sequence similarity 134, member A	1025.38	1172.43	0.874685	-0.193164	0.597185	1
ENSMUSG00000026197	Zfand2b	zinc finger, AN1 type domain 2B	181.222	201.903	0.898074	-0.155094	0.718899	1
ENSMUSG00000026198	Abcb6	ATP-binding cassette, sub-family B (MDR/TAP), member 6	271.916	398.104	0.683821	-0.548309	0.262471	1
ENSMUSG00000033124	Atg9a	autophagy related 9A	455.519	679.4	0.670956	-0.575709	0.0954431	1
ENSMUSG00000026199	Ankzf1	ankyrin repeat and zinc finger domain containing 1	373.194	547.556	0.682143	-0.551854	0.191018	1
ENSMUSG00000026201	Stk16	serine/threonine kinase 16	524.056	754.273	0.695186	-0.524528	0.132584	1
ENSMUSG00000033021	Gmppa	GDP-mannose pyrophosphorylase A	267.307	271.265	0.985462	-0.0211278	0.986649	1
ENSMUSG00000026213	Stk11ip	serine/threonine kinase 11 interacting protein	297.7	317.301	0.938422	-0.0916919	0.821861	1
ENSMUSG00000032908	Sgpp2	sphingosine-1-phosphate phosphotase 2	480.461	620.304	0.77492	-0.367881	0.35684	1
ENSMUSG00000012187	Mogat1	monoacylglycerol O-acyltransferase 1	106.845	148.601	0.720886	-0.472157	0.683076	1
ENSMUSG00000032883	Acsl3	acyl-CoA synthetase long-chain family member 3	357.809	445.77	0.803117	-0.316318	0.353654	1
ENSMUSG00000079470	Utp14b	UTP14B small subunit processome component	408.103	452.338	0.902423	-0.148124	0.652759	1
ENSMUSG00000054702	Ap1s3	adaptor-related protein complex AP-1, sigma 3	65.665	85.6382	0.769464	-0.378074	0.46135	1
ENSMUSG00000073643	Wdfy1	WD repeat and FYVE domain containing 1	396.255	492.682	0.804679	-0.313515	0.383445	1
ENSMUSG00000026248	Mrpl44	mitochondrial ribosomal protein L44	204.887	259.333	0.79086	-0.338506	0.357579	1
ENSMUSG00000067106	Gm5529	predicted pseudogene 5529	200.305	221.878	0.903206	-0.146873	0.747887	1
ENSMUSG00000004364	Cul3	cullin 3	2196.3	2239.6	0.980676	-0.0281519	0.945286	1
ENSMUSG00000090637	Gm6189	predicted gene 6189	2.10869	3.54303	0.684278	-0.547346	0.788176	1
ENSMUSG00000038608	Dock10	dedicator of cytokinesis 10	1117.67	1124.95	0.993537	-0.00935422	0.894446	1
ENSMUSG00000055980	Irs1	insulin receptor substrate 1	714.427	781.215	0.914617	-0.12876	0.626337	1
ENSMUSG00000026150	Mff	mitochondrial fission factor	546.209	565.285	0.966315	-0.0494349	0.872109	1
ENSMUSG00000026149	Tm4sf20	transmembrane 4 L six family member 20	12.5641	13.1817	0.956449	-0.0642406	0.955097	1
ENSMUSG00000038496	Slc19a3	solute carrier family 19, member 3	133.059	182.918	0.728908	-0.456191	0.257036	1
ENSMUSG00000053161	Daw1	dynein assembly factor with WDR repeat domains 1	0.855216	4.44267	0.340865	-1.55273	0.550963	1
ENSMUSG00000079140	Gm6374	predicted gene 6374	47.8081	55.6863	0.861022	-0.215879	0.68289	1
ENSMUSG00000045658	Pid1	phosphotyrosine interaction domain containing 1	396.471	431.497	0.919015	-0.12184	0.841281	1
ENSMUSG00000073633	Fbxo36	F-box protein 36	83.9241	89.7093	0.936223	-0.0950753	0.910808	1
ENSMUSG00000026220	Slc16a14	solute carrier family 16 (monocarboxylic acid transporters), member 14	182.643	312.024	0.586672	-0.769374	0.348691	1
ENSMUSG00000064281	Rpl19-ps1	ribosomal protein L19, pseudogene 1	116.865	132.495	0.882916	-0.179652	0.700678	1
ENSMUSG00000073628	Gm10552	predicted gene 10552	8.02183	11.2698	0.735288	-0.443619	0.8303	1
ENSMUSG00000077274	Gm22786	predicted gene, 22786	16.2071	24.7105	0.669266	-0.579349	0.605165	1
ENSMUSG00000062590	Armc9	armadillo repeat containing 9	161.162	168.768	0.955199	-0.0661267	0.888753	1
ENSMUSG00000026234	Ncl	nucleolin	8952.46	8976.64	0.997306	-0.0038918	0.962998	1
ENSMUSG00000064837	Snora75	small nucleolar RNA, H/ACA box 75	8.77433	11.9559	0.754432	-0.406537	0.858325	1
ENSMUSG00000026240	Cops7b	COP9 signalosome subunit 7B	80.7507	94.3319	0.857538	-0.221728	0.72246	1
ENSMUSG00000053333	Dis3l2	DIS3 like 3'-5' exoribonuclease 2	369.53	398.991	0.926346	-0.110376	0.777449	1
ENSMUSG00000084106	Gm6136	predicted pseudogene 6136	1067.48	1153.95	0.925126	-0.112278	0.700692	1
ENSMUSG00000026254	Eif4e2	eukaryotic translation initiation factor 4E member 2	929.792	1100.37	0.845123	-0.242767	0.455155	1
ENSMUSG00000026255	Efhd1	EF hand domain containing 1	922.965	996.467	0.926311	-0.110432	0.696566	1
ENSMUSG00000089821	Efhd1os	EF hand domain containing 1, opposite strand	15.1004	23.271	0.663359	-0.592138	0.530168	1
ENSMUSG00000048000	Gigyf2	GRB10 interacting GYF protein 2	2101.69	2758.51	0.76198	-0.392175	0.211404	1
ENSMUSG00000026259	Ngef	neuronal guanine nucleotide exchange factor	501.648	743.656	0.675007	-0.567025	0.104603	1
ENSMUSG00000079434	Neu2	neuraminidase 2	35.9232	89.9111	0.406146	-1.29993	0.144596	1
ENSMUSG00000026289	Atg16l1	autophagy related 16-like 1 (S. cerevisiae)	537.991	594.675	0.90484	-0.144265	0.631946	1
ENSMUSG00000089281	Scarna6	small Cajal body-specific RNA 6	214.944	260.648	0.825323	-0.276969	0.495689	1
ENSMUSG00000070738	Dgkd	diacylglycerol kinase, delta	1254.07	1367.73	0.916959	-0.125071	0.655592	1
ENSMUSG00000005501	Usp40	ubiquitin specific peptidase 40	664.577	720.264	0.922793	-0.115921	0.700134	1
ENSMUSG00000090165	Ugt1a10	UDP glycosyltransferase 1 family, polypeptide A10	20.2338	26.6678	0.767455	-0.381847	0.771685	1
ENSMUSG00000090145	Ugt1a6b	UDP glucuronosyltransferase 1 family, polypeptide A6B	7.10792	8.27827	0.873861	-0.194525	0.835555	1
ENSMUSG00000054545	Ugt1a6a	UDP glucuronosyltransferase 1 family, polypeptide A6A	66.8031	106.434	0.631114	-0.664028	0.24297	1
ENSMUSG00000084195	Gm15372	predicted gene 15372	4.58629	17.4781	0.302319	-1.72585	0.505948	1
ENSMUSG00000081602	Gm15369	predicted gene 15369	1.65173	10.9772	0.221398	-2.17528	0.48903	1
ENSMUSG00000082677	Gm15371	predicted gene 15371	9.14324	31.8302	0.308961	-1.6945	0.0856857	1
ENSMUSG00000089943	Ugt1a5	UDP glucuronosyltransferase 1 family, polypeptide A5	11.5915	30.8515	0.395319	-1.33891	0.184486	1
ENSMUSG00000081488	Gm15368	predicted gene 15368	5.83977	9.17792	0.67202	-0.573424	0.72047	1
ENSMUSG00000083277	Gm15376	predicted gene 15376	3.39151	10.3365	0.387378	-1.36819	0.350083	1
ENSMUSG00000090171	Ugt1a2	UDP glucuronosyltransferase 1 family, polypeptide A2	2284.02	2732.48	0.835938	-0.258533	0.729305	1
ENSMUSG00000081984	Dnajb3	DnaJ heat shock protein family (Hsp40) member B3	24.6712	43.4144	0.577993	-0.790876	0.587698	1
ENSMUSG00000089960	Ugt1a1	UDP glucuronosyltransferase 1 family, polypeptide A1	8.789	25.4302	0.370372	-1.43295	0.205186	1
ENSMUSG00000055013	Agap1	ArfGAP with GTPase domain, ankyrin repeat and PH domain 1	1932.6	2216.6	0.871937	-0.197705	0.526533	1
ENSMUSG00000088371	Gm25180	predicted gene, 25180	2.50695	13.6542	0.239313	-2.06303	0.181997	1
ENSMUSG00000088775	Gm26037	predicted gene, 26037	0	8.31192	0.107389	-3.21908	0.0684773	1
ENSMUSG00000026301	Iqca	IQ motif containing with AAA domain	2.89054	9.68407	0.364144	-1.45742	0.372788	1
ENSMUSG00000026303	Mlph	melanophilin	161.87	223.464	0.725598	-0.462758	0.282975	1
ENSMUSG00000026307	Scly	selenocysteine lyase	781.806	932.197	0.838843	-0.253526	0.463089	1
ENSMUSG00000047443	Fam132b	family with sequence similarity 132, member B	21.0135	21.6736	0.970889	-0.0426212	0.98675	1
ENSMUSG00000067071	Hes6	hairy and enhancer of split 6	196.043	330.471	0.594451	-0.750371	0.064814	1
ENSMUSG00000055866	Per2	period circadian clock 2	490.17	760.931	0.644638	-0.633439	0.23098	1
ENSMUSG00000034292	Traf3ip1	TRAF3 interacting protein 1	305.121	430.068	0.710145	-0.493814	0.178446	1
ENSMUSG00000007805	Twist2	twist basic helix-loop-helix transcription factor 2	8.34672	13.8342	0.63008	-0.666392	0.689579	1
ENSMUSG00000026260	Ndufa10	NADH dehydrogenase (ubiquinone) 1 alpha subcomplex 10	2037.65	2715.16	0.750561	-0.413959	0.168936	1
ENSMUSG00000073616	Myeov2	myeloma overexpressed 2	247.492	315.986	0.783922	-0.351218	0.332075	1
ENSMUSG00000026269	Rnpepl1	arginyl aminopeptidase (aminopeptidase B)-like 1	905.651	1078.72	0.839711	-0.252035	0.444743	1
ENSMUSG00000026270	Capn10	calpain 10	181.572	290.847	0.625574	-0.676748	0.0950146	1
ENSMUSG00000026271	Gpr35	G protein-coupled receptor 35	83.6726	136.949	0.613796	-0.704169	0.134485	1
ENSMUSG00000034159	2310007B03Rik	RIKEN cDNA 2310007B03 gene	30.9239	41.4469	0.752091	-0.411021	0.557031	1
ENSMUSG00000026273	Mterf4	mitochondrial transcription termination factor 4	184.745	236.184	0.783125	-0.352685	0.406615	1
ENSMUSG00000026275	Ppp1r7	protein phosphatase 1, regulatory (inhibitor) subunit 7	546.731	549.246	0.99543	-0.00660829	0.956267	1
ENSMUSG00000034107	Ano7	anoctamin 7	15.1591	22.2134	0.696112	-0.522609	0.71384	1
ENSMUSG00000034088	Hdlbp	high density lipoprotein (HDL) binding protein	6483.14	6866.75	0.944143	-0.0829227	0.78712	1
ENSMUSG00000034066	Farp2	FERM, RhoGEF and pleckstrin domain protein 2	554.894	625.614	0.887139	-0.172769	0.6612	1
ENSMUSG00000026277	Stk25	serine/threonine kinase 25 (yeast)	1018.29	1127.85	0.902951	-0.14728	0.634527	1
ENSMUSG00000026278	Bok	BCL2-related ovarian killer	58.3076	60.1846	0.969323	-0.0449513	0.984297	1
ENSMUSG00000026279	Thap4	THAP domain containing 4	433.017	551.822	0.785094	-0.349064	0.291137	1
ENSMUSG00000026281	Dtymk	deoxythymidylate kinase	128.999	168.283	0.767938	-0.380939	0.442153	1
ENSMUSG00000073609	D2hgdh	D-2-hydroxyglutarate dehydrogenase	184.2	229.098	0.804873	-0.313166	0.479563	1
ENSMUSG00000026285	Pdcd1	programmed cell death 1	22.5039	28.0853	0.808102	-0.307391	0.728868	1
ENSMUSG00000044757	Gm6430	predicted gene 6430	5.0139	16.7248	0.339294	-1.55939	0.258341	1
ENSMUSG00000044768	D1Ertd622e	DNA segment, Chr 1, ERATO Doi 622, expressed	363.441	377.734	0.96226	-0.0555011	0.841964	1
ENSMUSG00000040648	Ppip5k2	diphosphoinositol pentakisphosphate kinase 2	578.337	616.853	0.937661	-0.0928622	0.80787	1
ENSMUSG00000026333	Gin1	gypsy retrotransposon integrase 1	73.5694	108.02	0.683999	-0.547934	0.341452	1
ENSMUSG00000089782	Gm3531	predicted pseudogene 3531	626.258	635.187	0.985965	-0.0203921	0.94932	1
ENSMUSG00000089706	B230216N24Rik	RIKEN cDNA B230216N24 gene	66.9184	101.024	0.665708	-0.58704	0.269265	1
ENSMUSG00000082431	Tdpx-ps1	thioredoxin peroxidase, pseudogene 1	71.4314	106.907	0.671242	-0.575096	0.295197	1
ENSMUSG00000047496	Rnf152	ring finger protein 152	533.134	596.768	0.893547	-0.162385	0.543565	1
ENSMUSG00000067017	Gm3608	predicted gene 3608	303.083	329.697	0.919522	-0.121044	0.662819	1
ENSMUSG00000056536	Pign	phosphatidylinositol glycan anchor biosynthesis, class N	228.998	230.032	0.995527	-0.00646781	0.958483	1
ENSMUSG00000076999	Gm22426	predicted gene, 22426	2.13804	6.64719	0.410352	-1.28507	0.528658	1
ENSMUSG00000044340	Phlpp1	PH domain and leucine rich repeat protein phosphatase 1	1047.11	1057.34	0.99033	-0.0140188	0.899343	1
ENSMUSG00000080542	Gm22710	predicted gene, 22710	38.5182	47.9142	0.807908	-0.307737	0.634468	1
ENSMUSG00000026380	Tfcp2l1	transcription factor CP2-like 1	6862.32	9148.33	0.750144	-0.41476	0.15658	1
ENSMUSG00000026383	Epb41l5	erythrocyte membrane protein band 4.1 like 5	884.323	1288.99	0.686303	-0.543082	0.0958116	1
ENSMUSG00000026384	Ptpn4	protein tyrosine phosphatase, non-receptor type 4	465.014	574.474	0.809792	-0.304377	0.351716	1
ENSMUSG00000091876	Gm3851	predicted gene 3851	1.71043	3.54303	0.596614	-0.745131	0.724339	1
ENSMUSG00000026385	Dbi	diazepam binding inhibitor	2753.29	3634.57	0.757594	-0.400503	0.287494	1
ENSMUSG00000026388	3110009E18Rik	RIKEN cDNA 3110009E18 gene	11.296	26.6678	0.444414	-1.17002	0.224795	1
ENSMUSG00000026339	Ccdc93	coiled-coil domain containing 93	759.847	1027.84	0.739523	-0.435333	0.177537	1
ENSMUSG00000085857	Gm15392	predicted gene 15392	4.98455	10.1902	0.534802	-0.902922	0.547718	1
ENSMUSG00000026343	Gpr39	G protein-coupled receptor 39	28.3416	43.1117	0.665166	-0.588214	0.381009	1
ENSMUSG00000049690	Nckap5	NCK-associated protein 5	449.319	492.256	0.912951	-0.131391	0.634211	1
ENSMUSG00000065687	Gm23734	predicted gene, 23734	64.074	133.506	0.483802	-1.04751	0.309712	1
ENSMUSG00000026347	Tmem163	transmembrane protein 163	31.8379	44.81	0.716827	-0.480304	0.462321	1
ENSMUSG00000026349	Ccnt2	cyclin T2	1068.34	1129.23	0.946128	-0.0798923	0.750928	1
ENSMUSG00000036104	Rab3gap1	RAB3 GTPase activating protein subunit 1	1538.76	1648.07	0.93371	-0.0989543	0.73886	1
ENSMUSG00000058603	Rpl28-ps1	ribosomal protein L28, pseudogene 1	1026.89	1064.95	0.964294	-0.0524554	0.816345	1
ENSMUSG00000056211	R3hdm1	R3H domain containing 1	985.345	1142.95	0.862227	-0.213861	0.516387	1
ENSMUSG00000026356	Dars	aspartyl-tRNA synthetase	758.592	830.295	0.913745	-0.130136	0.7413	1
ENSMUSG00000045382	Cxcr4	chemokine (C-X-C motif) receptor 4	340.027	385.631	0.882049	-0.181069	0.55262	1
ENSMUSG00000042581	Thsd7b	thrombospondin, type I, domain containing 7B	5.51488	7.87305	0.734232	-0.445692	0.898451	1
ENSMUSG00000087691	Gm15674	predicted gene 15674	1.2388	6.86076	0.284807	-1.81194	0.543537	1
ENSMUSG00000026399	Cd55	CD55 molecule, decay accelerating factor for complement	113.754	127.085	0.89592	-0.158559	0.689408	1
ENSMUSG00000026405	C4bp	complement component 4 binding protein	1.28282	8.4582	0.241359	-2.05075	0.224195	1
ENSMUSG00000026409	Pfkfb2	6-phosphofructo-2-kinase/fructose-2,6-biphosphatase 2	489.359	651.777	0.751188	-0.412754	0.220005	1
ENSMUSG00000042510	AA986860	expressed sequence AA986860	439.723	473.01	0.929776	-0.105045	0.807292	1
ENSMUSG00000086706	Gm15848	predicted gene 15848	62.7912	83.4892	0.755021	-0.405411	0.539799	1
ENSMUSG00000042474	Fcmr	Fc fragment of IgM receptor	5.89846	9.4705	0.658848	-0.601983	0.627844	1
ENSMUSG00000088705	Gm25549	predicted gene, 25549	10.1158	15.7915	0.661994	-0.595111	0.59412	1
ENSMUSG00000026427	Eif2d	eukaryotic translation initiation factor 2D	419.023	484.574	0.865005	-0.20922	0.530292	1
ENSMUSG00000026430	Rassf5	Ras association (RalGDS/AF-6) domain family member 5	360.364	424.063	0.850142	-0.234224	0.478138	1
ENSMUSG00000042251	Pm20d1	peptidase M20 domain containing 1	417.667	602.827	0.693356	-0.528332	0.139593	1
ENSMUSG00000026435	Slc45a3	solute carrier family 45, member 3	260.536	290.408	0.897493	-0.156028	0.72453	1
ENSMUSG00000059149	Mfsd4a	major facilitator superfamily domain containing 4A	1451.6	1532.51	0.947241	-0.0781967	0.807658	1
ENSMUSG00000026437	Cdk18	cyclin-dependent kinase 18	546.871	681.065	0.803254	-0.316072	0.534829	1
ENSMUSG00000042115	Klhdc8a	kelch domain containing 8A	230.692	292.838	0.788503	-0.342812	0.389452	1
ENSMUSG00000009772	Nuak2	NUAK family, SNF1-like kinase, 2	1097.45	1250.94	0.877402	-0.188689	0.609004	1
ENSMUSG00000026439	Rbbp5	retinoblastoma binding protein 5	560.492	628.022	0.892643	-0.163844	0.642251	1
ENSMUSG00000048174	Tmem81	transmembrane protein 81	27.5765	38.1628	0.729683	-0.454659	0.499022	1
ENSMUSG00000053024	Cntn2	contactin 2	10.9417	17.051	0.661555	-0.596067	0.658903	1
ENSMUSG00000046062	Ppp1r15b	protein phosphatase 1, regulatory (inhibitor) subunit 15b	1585.27	1833.9	0.864498	-0.210066	0.485847	1
ENSMUSG00000041757	Plekha6	pleckstrin homology domain containing, family A member 6	2791.27	4310.56	0.647624	-0.626771	0.0677021	1
ENSMUSG00000090553	Snrpe	small nuclear ribonucleoprotein E	48.3552	52.863	0.91631	-0.126093	0.844553	1
ENSMUSG00000064246	Chil1	chitinase-like 1	8.77433	11.2362	0.798807	-0.324081	0.852944	1
ENSMUSG00000042451	Mybph	myosin binding protein H	3.31814	9.68407	0.404167	-1.30698	0.417317	1
ENSMUSG00000042429	Adora1	adenosine A1 receptor	136.799	205.007	0.668904	-0.580129	0.176246	1
ENSMUSG00000042305	Tmem183a	transmembrane protein 183A	599.553	758.401	0.790824	-0.338571	0.338565	1
ENSMUSG00000026455	Klhl12	kelch-like 12	283.78	355.373	0.799107	-0.32354	0.411557	1
ENSMUSG00000003051	Elf3	E74-like factor 3	572.652	638.875	0.896507	-0.157614	0.680671	1
ENSMUSG00000062580	Timm17a	translocase of inner mitochondrial membrane 17a	223.777	303.119	0.739109	-0.436141	0.241517	1
ENSMUSG00000041782	Lad1	ladinin	1636.05	2090.11	0.782862	-0.353171	0.273344	1
ENSMUSG00000051985	Igfn1	immunoglobulin-like and fibronectin type III domain containing 1	5.0726	32.7181	0.180099	-2.47314	0.350009	1
ENSMUSG00000026411	Tmem9	transmembrane protein 9	271.556	297.112	0.914272	-0.129304	0.726652	1
ENSMUSG00000041642	Kif21b	kinesin family member 21B	356.381	410.95	0.867536	-0.205005	0.584098	1
ENSMUSG00000041605	5730559C18Rik	RIKEN cDNA 5730559C18 gene	57.0541	97.8413	0.587347	-0.767715	0.172189	1
ENSMUSG00000026395	Ptprc	protein tyrosine phosphatase, receptor type, C	1947.55	2363.01	0.824255	-0.278838	0.52833	1
ENSMUSG00000026394	Atp6v1g3	ATPase, H+ transporting, lysosomal V1 subunit G3	913.681	1138.27	0.802865	-0.316771	0.509986	1
ENSMUSG00000079283	2310009B15Rik	RIKEN cDNA 2310009B15 gene	32.6637	41.7059	0.788269	-0.343239	0.56071	1
ENSMUSG00000056268	Dennd1b	DENN/MADD domain containing 1B	916.046	978.774	0.935977	-0.0954556	0.753803	1
ENSMUSG00000063681	Crb1	crumbs family member 1, photoreceptor morphogenesis associated	5.04325	12.6756	0.441901	-1.17821	0.603799	1
ENSMUSG00000033964	Zbtb41	zinc finger and BTB domain containing 41	1079.91	1161.86	0.929529	-0.105429	0.715458	1
ENSMUSG00000033952	Aspm	asp (abnormal spindle)-like, microcephaly associated (Drosophila)	56.7879	110.044	0.520404	-0.942296	0.0957799	1
ENSMUSG00000026361	Cdc73	cell division cycle 73, Paf1/RNA polymerase II complex component	869.084	886.926	0.979906	-0.0292841	0.951833	1
ENSMUSG00000033849	B3galt2	UDP-Gal:betaGlcNAc beta 1,3-galactosyltransferase, polypeptide 2	93.6523	96.2673	0.973116	-0.0393169	0.854034	1
ENSMUSG00000018196	Glrx2	glutaredoxin 2 (thioltransferase)	229.321	287.383	0.798665	-0.324338	0.417002	1
ENSMUSG00000018189	Uchl5	ubiquitin carboxyl-terminal esterase L5	219.161	286.764	0.765076	-0.386325	0.342729	1
ENSMUSG00000026360	Rgs2	regulator of G-protein signaling 2	1163.74	1255.51	0.926966	-0.109412	0.679656	1
ENSMUSG00000026357	Rgs18	regulator of G-protein signaling 18	5.10195	17.3436	0.332648	-1.58793	0.202478	1
ENSMUSG00000032487	Ptgs2	prostaglandin-endoperoxide synthase 2	510.347	527.09	0.968296	-0.0464794	0.911858	1
ENSMUSG00000006014	Prg4	proteoglycan 4 (megakaryocyte stimulating factor, articular superficial zone protein)	10.5288	15.8251	0.685213	-0.545376	0.661461	1
ENSMUSG00000052748	Swt1	SWT1 RNA endoribonuclease homolog (S. cerevisiae)	532.22	711.659	0.748212	-0.418481	0.19826	1
ENSMUSG00000053286	Trmt1l	tRNA methyltransferase 1 like	405.009	447.603	0.905052	-0.143927	0.669126	1
ENSMUSG00000043019	Edem3	ER degradation enhancer, mannosidase alpha-like 3	1203.3	1300.23	0.92551	-0.111679	0.715478	1
ENSMUSG00000014980	Tsen15	tRNA splicing endonuclease subunit 15	132.082	133.418	0.990065	-0.0144044	0.871233	1
ENSMUSG00000026482	Rgl1	ral guanine nucleotide dissociation stimulator,-like 1	3009.11	3569.21	0.843118	-0.246194	0.440876	1
ENSMUSG00000080950	Gm7278	predicted gene 7278	32.8692	46.8565	0.707723	-0.498744	0.535204	1
ENSMUSG00000026480	Ncf2	neutrophil cytosolic factor 2	218.172	247.624	0.88154	-0.181903	0.600853	1
ENSMUSG00000042772	Smg7	Smg-7 homolog, nonsense mediated mRNA decay factor (C. elegans)	1826.71	1860.36	0.981926	-0.0263144	0.933024	1
ENSMUSG00000079138	Gm8818	predicted pseudogene 8818	54.7673	61.9283	0.886203	-0.17429	0.788936	1
ENSMUSG00000073538	E330020D12Rik	Riken cDNA E330020D12 gene	2.94923	3.21681	0.936545	-0.0945794	0.983093	1
ENSMUSG00000042708	Shcbp1l	Shc SH2-domain binding protein 1-like	13.8763	15.4989	0.901653	-0.149356	0.9466	1
ENSMUSG00000042699	Dhx9	DEAH (Asp-Glu-Ala-His) box polypeptide 9	2229.29	2344.53	0.950868	-0.0726831	0.854009	1
ENSMUSG00000042684	Npl	N-acetylneuraminate pyruvate lyase	255.107	290.51	0.878553	-0.186799	0.759171	1
ENSMUSG00000066800	Rnasel	ribonuclease L (2', 5'-oligoisoadenylate synthetase-dependent)	235.706	277.024	0.851385	-0.232116	0.53794	1
ENSMUSG00000045968	Teddm2	transmembrane epididymal family member 2	4.12934	11.0562	0.425451	-1.23293	0.426326	1
ENSMUSG00000026473	Glul	glutamate-ammonia ligase (glutamine synthetase)	4584.35	5458.64	0.839864	-0.251773	0.393077	1
ENSMUSG00000066797	Zfp648	zinc finger protein 648	44.4753	55.2694	0.808172	-0.307266	0.747879	1
ENSMUSG00000026469	Xpr1	xenotropic and polytropic retrovirus receptor 1	1556.83	1745.03	0.892212	-0.164542	0.594345	1
ENSMUSG00000015484	Fam163a	family with sequence similarity 163, member A	81.6226	89.4401	0.913562	-0.130426	0.723778	1
ENSMUSG00000026602	Nphs2	nephrosis 2, podocin	175.956	388.545	0.454265	-1.1384	0.185931	1
ENSMUSG00000026600	Soat1	sterol O-acyltransferase 1	601.939	735.186	0.819003	-0.288059	0.439404	1
ENSMUSG00000033557	Fam20b	family with sequence similarity 20, member B	1328.38	1522.79	0.872415	-0.196914	0.530429	1
ENSMUSG00000026594	Ralgps2	Ral GEF with PH domain and SH3 binding motif 2	171.506	284.437	0.604358	-0.726524	0.104627	1
ENSMUSG00000033488	BC026585	cDNA sequence BC026585	836.739	1394.31	0.600397	-0.736012	0.125997	1
ENSMUSG00000026589	Sec16b	SEC16 homolog B (S. cerevisiae)	51.5413	56.4953	0.913837	-0.129991	0.9972	1
ENSMUSG00000089536	Scarna3a	small Cajal body-specific RNA 3A	10.0718	10.5837	0.955809	-0.0652053	1	1
ENSMUSG00000058267	Mrps14	mitochondrial ribosomal protein S14	262.412	315.401	0.832528	-0.26443	0.465435	1
ENSMUSG00000014226	Cacybp	calcyclin binding protein	476.818	589.467	0.80922	-0.305397	0.344106	1
ENSMUSG00000026721	Rabgap1l	RAB GTPase activating protein 1-like	1344.01	1692.92	0.794022	-0.33275	0.264867	1
ENSMUSG00000026709	Dars2	aspartyl-tRNA synthetase 2 (mitochondrial)	230.028	249.884	0.920854	-0.118956	0.764226	1
ENSMUSG00000044835	Ankrd45	ankyrin repeat domain 45	25.0548	26.8813	0.93449	-0.0977487	0.942198	1
ENSMUSG00000026701	Prdx6	peroxiredoxin 6	1008.53	1343.17	0.751044	-0.41303	0.185452	1
ENSMUSG00000040323	Gm15429	predicted pseudogene 15429	196.808	230.077	0.856027	-0.224272	0.611675	1
ENSMUSG00000000817	Fasl	Fas ligand (TNF superfamily, member 6)	13.5074	22.9112	0.606719	-0.720899	0.437436	1
ENSMUSG00000026698	Pigc	phosphatidylinositol glycan anchor biosynthesis, class C	114.018	179.61	0.636831	-0.651018	0.143766	1
ENSMUSG00000026692	Fmo4	flavin containing monooxygenase 4	161.992	255.79	0.634729	-0.655788	0.0973012	1
ENSMUSG00000026585	Kifap3	kinesin-associated protein 3	691.399	750.91	0.920853	-0.118957	0.773342	1
ENSMUSG00000026584	Scyl3	SCY1-like 3 (S. cerevisiae)	321.118	363.517	0.883686	-0.178395	0.630936	1
ENSMUSG00000041406	BC055324	cDNA sequence BC055324	16.3392	21.7862	0.760951	-0.394125	0.72181	1
ENSMUSG00000040918	Slc19a2	solute carrier family 19 (thiamine transporter), member 2	160.81	189.126	0.851065	-0.232659	0.539025	1
ENSMUSG00000026578	Ccdc181	coiled-coil domain containing 181	509.215	620.564	0.820856	-0.284799	0.438749	1
ENSMUSG00000026577	Blzf1	basic leucine zipper nuclear factor 1	382.021	453.598	0.842549	-0.247167	0.479436	1
ENSMUSG00000026575	Nme7	NME/NM23 family member 7	121.495	146.374	0.831183	-0.266762	0.538753	1
ENSMUSG00000026576	Atp1b1	ATPase, Na+/K+ transporting, beta 1 polypeptide	25302.2	33073.9	0.765027	-0.386417	0.213201	1
ENSMUSG00000026573	Xcl1	chemokine (C motif) ligand 1	5.41216	23.3837	0.262969	-1.92703	0.0865733	1
ENSMUSG00000040843	Tiprl	TIP41, TOR signalling pathway regulator-like (S. cerevisiae)	304.232	321.441	0.946629	-0.0791283	0.79	1
ENSMUSG00000026571	Dcaf6	DDB1 and CUL4 associated factor 6	1078.58	1293.31	0.834101	-0.261707	0.414738	1
ENSMUSG00000089299	Gm24637	predicted gene, 24637	3.39151	6.5799	0.579363	-0.787461	0.630258	1
ENSMUSG00000026567	Adcy10	adenylate cyclase 10	21.1309	21.7862	0.971242	-0.0420978	0.997978	1
ENSMUSG00000040713	Creg1	cellular repressor of E1A-stimulated genes 1	919.049	965.534	0.951906	-0.0711091	0.873391	1
ENSMUSG00000089829	Gm16565	predicted gene 16565	4.67434	5.78118	0.836777	-0.257085	0.917348	1
ENSMUSG00000005763	Cd247	CD247 antigen	30.6871	31.5493	0.973511	-0.0387306	0.896528	1
ENSMUSG00000000544	Gpa33	glycoprotein A33 (transmembrane)	2.56565	3.07052	0.875968	-0.19105	1	1
ENSMUSG00000026563	Tada1	transcriptional adaptor 1	179.507	204.523	0.878283	-0.187242	0.715168	1
ENSMUSG00000084093	Gm16418	predicted pseudogene 16418	425.792	600.421	0.709639	-0.494843	0.157956	1
ENSMUSG00000052428	Tmco1	transmembrane and coiled-coil domains 1	1904.87	1925.51	0.989286	-0.0155398	0.979843	1
ENSMUSG00000088246	Gm25911	predicted gene, 25911	81.0462	97.8632	0.829897	-0.268996	0.712494	1
ENSMUSG00000026687	Aldh9a1	aldehyde dehydrogenase 9, subfamily A1	2096.29	2852.74	0.734925	-0.444331	0.387033	1
ENSMUSG00000026688	Mgst3	microsomal glutathione S-transferase 3	417.476	535.681	0.779749	-0.358918	0.30888	1
ENSMUSG00000015843	Rxrg	retinoid X receptor gamma	10.2039	12.462	0.83226	-0.264895	0.920179	1
ENSMUSG00000026675	Hsd17b7	hydroxysteroid (17-beta) dehydrogenase 7	176.189	213.949	0.824329	-0.278708	0.456866	1
ENSMUSG00000038473	Nos1ap	nitric oxide synthase 1 (neuronal) adaptor protein	295.194	364.27	0.810889	-0.302424	0.424799	1
ENSMUSG00000042800	1700015E13Rik	RIKEN cDNA 1700015E13 gene	8.40542	10.8763	0.791949	-0.336521	0.814258	1
ENSMUSG00000053925	Gm9929	predicted gene 9929	11.6795	18.3222	0.656216	-0.607758	0.549767	1
ENSMUSG00000026659	Dusp12	dual specificity phosphatase 12	48.3825	52.4242	0.924348	-0.113492	0.895044	1
ENSMUSG00000038421	Fcrla	Fc receptor-like A	10.4848	12.4284	0.855261	-0.225564	0.902837	1
ENSMUSG00000089838	Gm2962	predicted pseudogene 2962	289.681	318.875	0.908732	-0.138073	0.772754	1
ENSMUSG00000058076	Sdhc	succinate dehydrogenase complex, subunit C, integral membrane protein	1374.44	1474.96	0.931892	-0.101765	0.793878	1
ENSMUSG00000005674	Tomm40l	translocase of outer mitochondrial membrane 40 homolog-like (yeast)	59.1921	70.3411	0.843723	-0.245159	0.735537	1
ENSMUSG00000013593	Ndufs2	NADH dehydrogenase (ubiquinone) Fe-S protein 2	3501.31	4071.37	0.860016	-0.217564	0.506736	1
ENSMUSG00000062729	Ppox	protoporphyrinogen oxidase	200.816	318.819	0.631031	-0.664217	0.0893076	1
ENSMUSG00000013973	Dedd	death effector domain-containing	75.9443	85.5709	0.888801	-0.170068	0.686707	1
ENSMUSG00000013997	Nit1	nitrilase 1	478.442	663.846	0.721132	-0.471664	0.166011	1
ENSMUSG00000048865	Arhgap30	Rho GTPase activating protein 30	509.8	690.277	0.738922	-0.436505	0.412548	1
ENSMUSG00000004709	Cd244	CD244 natural killer cell receptor 2B4	43.7689	68.6208	0.643039	-0.637022	0.28287	1
ENSMUSG00000059058	Tma7-ps	translational machinery associated 7 homolog (S. cerevisiae), pseudogene	196.2	287.865	0.682672	-0.550735	0.197268	1
ENSMUSG00000003464	Pex19	peroxisomal biogenesis factor 19	681.268	710.951	0.958308	-0.0614389	0.811326	1
ENSMUSG00000026554	Dcaf8	DDB1 and CUL4 associated factor 8	3726.61	4014.09	0.928401	-0.10718	0.76624	1
ENSMUSG00000092085	Gm17224	predicted gene 17224	2.89054	3.39674	0.884869	-0.176465	0.985337	1
ENSMUSG00000038034	Igsf8	immunoglobulin superfamily, member 8	251.676	264.123	0.953051	-0.0693747	0.850285	1
ENSMUSG00000044708	Kcnj10	potassium inwardly-rectifying channel, subfamily J, member 10	1530.3	1636.77	0.934994	-0.0969715	0.791428	1
ENSMUSG00000050229	Pigm	phosphatidylinositol glycan anchor biosynthesis, class M	398.312	398.834	0.998693	-0.00188652	0.95633	1
ENSMUSG00000037995	Igsf9	immunoglobulin superfamily, member 9	151.549	167.575	0.904931	-0.144121	0.755293	1
ENSMUSG00000037860	Aim2	absent in melanoma 2	84.1296	96.0083	0.877549	-0.188448	0.687442	1
ENSMUSG00000070501	Ifi214	interferon activated gene 214	6.68031	22.6522	0.324718	-1.62274	0.159657	1
ENSMUSG00000026532	Spta1	spectrin alpha, erythrocytic 1	6.29672	7.54684	0.853734	-0.228142	1	1
ENSMUSG00000026526	Fh1	fumarate hydratase 1	1093.94	1626.65	0.672713	-0.571938	0.0619162	1
ENSMUSG00000039783	Kmo	kynurenine 3-monooxygenase (kynurenine 3-hydroxylase)	578.2	904.755	0.639466	-0.64506	0.261705	1
ENSMUSG00000039748	Exo1	exonuclease 1	3.7164	5.92747	0.680826	-0.554642	0.753975	1
ENSMUSG00000078184	Rbm8a2	RNA binding motif protein 8A2	168.549	205.029	0.822937	-0.281147	0.551436	1
ENSMUSG00000087082	Gm15423	predicted gene 15423	4.21738	13.1481	0.368769	-1.43921	0.352685	1
ENSMUSG00000063659	Zbtb18	zinc finger and BTB domain containing 18	451.723	518.405	0.871618	-0.198232	0.665271	1
ENSMUSG00000015962	1700016C15Rik	RIKEN cDNA 1700016C15 gene	66.2141	106.806	0.623475	-0.681597	0.243924	1
ENSMUSG00000015961	Adss	adenylosuccinate synthetase, non muscle	815.013	852.442	0.956143	-0.0647014	0.843637	1
ENSMUSG00000026502	Desi2	desumoylating isopeptidase 2	256.954	278.734	0.92214	-0.116943	0.711564	1
ENSMUSG00000086350	B230369F24Rik	RIKEN cDNA B230369F24 gene	31.2028	37.6231	0.83377	-0.262278	0.642396	1
ENSMUSG00000026495	Efcab2	EF-hand calcium binding domain 2	172.194	200.408	0.859916	-0.217732	0.530806	1
ENSMUSG00000026492	Tfb2m	transcription factor B2, mitochondrial	154.396	163.291	0.945857	-0.0803057	0.804327	1
ENSMUSG00000087236	Gm1305	predicted gene 1305	4.24673	4.44267	0.963999	-0.052897	1	1
ENSMUSG00000060743	H3f3a	H3 histone, family 3A	168.624	243.17	0.694697	-0.525544	0.19025	1
ENSMUSG00000062169	Cnih4	cornichon family AMPA receptor auxiliary protein 4	422.304	488.611	0.864572	-0.209942	0.534355	1
ENSMUSG00000054135	A430110L20Rik	RIKEN cDNA A430110L20 gene	23.5498	25.9027	0.912542	-0.132037	0.949836	1
ENSMUSG00000089429	Gm26004	predicted gene, 26004	2.12336	8.67178	0.322936	-1.63068	0.348515	1
ENSMUSG00000026511	Srp9	signal recognition particle 9	166.255	187.673	0.88648	-0.173839	0.868178	1
ENSMUSG00000038633	Degs1	delta(4)-desaturase, sphingolipid 1	874.681	972.406	0.899605	-0.152637	0.665227	1
ENSMUSG00000026510	Trp53bp2	transformation related protein 53 binding protein 2	1699.37	1920.84	0.884759	-0.176644	0.587723	1
ENSMUSG00000038576	Susd4	sushi domain containing 4	91.8705	166.45	0.554615	-0.850441	0.074768	1
ENSMUSG00000079164	Tlr5	toll-like receptor 5	18.6847	20.7739	0.904051	-0.145525	0.940938	1
ENSMUSG00000059483	Gm5528	predicted gene 5528	1.65173	6.82712	0.338788	-1.56154	0.462572	1
ENSMUSG00000026621	Marc1	mitochondrial amidoxime reducing component 1	2.90521	6.79348	0.501087	-0.996867	0.594418	1
ENSMUSG00000073481	Marc2	mitochondrial amidoxime reducing component 2	1606.78	2127.72	0.755279	-0.404918	0.195091	1
ENSMUSG00000088562	Gm23780	predicted gene, 23780	1.71043	5.12875	0.442249	-1.17707	0.643323	1
ENSMUSG00000039349	C130074G19Rik	RIKEN cDNA C130074G19 gene	2841.83	3304.25	0.860093	-0.217435	0.496583	1
ENSMUSG00000026618	Iars2	isoleucine-tRNA synthetase 2, mitochondrial	1223.24	1311.26	0.932929	-0.100161	0.793553	1
ENSMUSG00000026617	Bpnt1	bisphosphate 3'-nucleotidase 1	1808.47	2091.22	0.864859	-0.209464	0.605633	1
ENSMUSG00000026615	Eprs	glutamyl-prolyl-tRNA synthetase	2459.82	2617.59	0.939748	-0.0896534	0.773079	1
ENSMUSG00000039246	Lyplal1	lysophospholipase-like 1	316.66	493.56	0.642308	-0.638663	0.175183	1
ENSMUSG00000001305	Rrp15	ribosomal RNA processing 15 homolog (S. cerevisiae)	146.669	149.028	0.984279	-0.0228611	0.978102	1
ENSMUSG00000026611	Spata17	spermatogenesis associated 17	21.7514	37.7576	0.587016	-0.768527	0.347629	1
ENSMUSG00000026610	Esrrg	estrogen-related receptor gamma	1005.16	1332.36	0.754606	-0.406204	0.197117	1
ENSMUSG00000026609	Ush2a	Usher syndrome 2A	3.39151	5.45497	0.680331	-0.555691	0.82865	1
ENSMUSG00000026608	Kctd3	potassium channel tetramerisation domain containing 3	286.199	382.211	0.749455	-0.416086	0.2442	1
ENSMUSG00000037624	Kcnk2	potassium channel, subfamily K, member 2	17.6514	26.8477	0.669764	-0.578276	0.516047	1
ENSMUSG00000026605	Cenpf	centromere protein F	71.991	100.631	0.718197	-0.477548	0.347317	1
ENSMUSG00000026603	Smyd2	SET and MYND domain containing 2	257.904	320.168	0.806131	-0.310914	0.476328	1
ENSMUSG00000010175	Prox1	prospero homeobox 1	405.598	473.415	0.857052	-0.222546	0.548816	1
ENSMUSG00000026634	Angel2	angel homolog 2 (Drosophila)	507.056	509.814	0.994602	-0.00780901	0.918008	1
ENSMUSG00000026632	Tatdn3	TatD DNase domain containing 3	110.788	133.361	0.831999	-0.265346	0.574061	1
ENSMUSG00000091017	Fam71a	family with sequence similarity 71, member A	366.782	617.141	0.594981	-0.749085	0.300243	1
ENSMUSG00000073478	D730003I15Rik	RIKEN cDNA D730003I15 gene	25.1429	34.8334	0.729567	-0.454887	0.557516	1
ENSMUSG00000026627	Tmem206	transmembrane protein 206	260.631	369.207	0.706714	-0.500801	0.20155	1
ENSMUSG00000026626	Ppp2r5a	protein phosphatase 2, regulatory subunit B', alpha	1375.71	1507.82	0.912442	-0.132195	0.651845	1
ENSMUSG00000026623	Lpgat1	lysophosphatidylglycerol acyltransferase 1	1404.41	1603.34	0.876003	-0.190992	0.532306	1
ENSMUSG00000064845	Gm26203	predicted gene, 26203	2.06467	7.36691	0.366284	-1.44896	0.563168	1
ENSMUSG00000026622	Nek2	NIMA (never in mitosis gene a)-related expressed kinase 2	18.2425	23.271	0.792816	-0.334942	0.74299	1
ENSMUSG00000055833	1700034H15Rik	RIKEN cDNA 1700034H15 gene	24.1703	42.7401	0.575451	-0.797236	0.33053	1
ENSMUSG00000037434	Slc30a1	solute carrier family 30 (zinc transporter), member 1	693.57	721.893	0.96082	-0.0576616	0.879964	1
ENSMUSG00000037375	Hhat	hedgehog acyltransferase	47.1877	57.3393	0.82599	-0.275803	0.680462	1
ENSMUSG00000016200	Syt14	synaptotagmin XIV	41.1592	78.1469	0.532671	-0.908684	0.184916	1
ENSMUSG00000016181	Diexf	digestive organ expansion factor homolog (zebrafish)	202.099	241.032	0.839139	-0.253018	0.529757	1
ENSMUSG00000026638	Irf6	interferon regulatory factor 6	290.947	345.183	0.843331	-0.245829	0.544368	1
ENSMUSG00000079144	A130010J15Rik	RIKEN cDNA A130010J15 gene	30.9826	32.4489	0.956163	-0.0646715	0.92015	1
ENSMUSG00000037318	Traf3ip3	TRAF3 interacting protein 3	47.4539	88.3152	0.542505	-0.882293	0.109717	1
ENSMUSG00000090080	Gm15872	predicted gene 15872	1.25348	5.06147	0.371771	-1.42752	0.480361	1
ENSMUSG00000009633	G0s2	G0/G1 switch gene 2	220.848	315.118	0.701789	-0.51089	0.316001	1
ENSMUSG00000026639	Lamb3	laminin, beta 3	31.4836	50.7039	0.628263	-0.67056	0.283319	1
ENSMUSG00000016179	Camk1g	calcium/calmodulin-dependent protein kinase I gamma	26.9581	62.4798	0.440425	-1.18303	0.13963	1
ENSMUSG00000026616	Cr2	complement receptor 2	41.8783	53.7744	0.782816	-0.353254	0.562659	1
ENSMUSG00000064065	Ipcef1	interaction protein for cytohesin exchange factors 1	456.781	584.439	0.781944	-0.354862	0.284185	1
ENSMUSG00000081926	Gm15536	predicted gene 15536	358.678	415.12	0.864362	-0.210293	0.54804	1
ENSMUSG00000019774	Mtrf1l	mitochondrial translational release factor 1-like	202.216	267.34	0.757308	-0.401048	0.302962	1
ENSMUSG00000019773	Fbxo5	F-box protein 5	23.0782	23.9907	0.963485	-0.0536657	0.983685	1
ENSMUSG00000019767	Ccdc170	coiled-coil domain containing 170	56.4231	111.159	0.511979	-0.965843	0.272707	1
ENSMUSG00000061759	Armt1	acidic residue methyltransferase 1	119.55	147.746	0.810438	-0.303227	0.494837	1
ENSMUSG00000019763	Rmnd1	required for meiotic nuclear division 1 homolog	260.484	289.981	0.89863	-0.154201	0.722448	1
ENSMUSG00000085687	Gm16153	predicted gene 16153	56.6999	94.5455	0.6039	-0.727619	0.222406	1
ENSMUSG00000082247	Gm16074	predicted gene 16074	2.90521	7.54684	0.456919	-1.12999	0.71325	1
ENSMUSG00000019762	Iyd	iodotyrosine deiodinase	640.36	692.523	0.924785	-0.112809	0.895475	1
ENSMUSG00000040653	Ppp1r14c	protein phosphatase 1, regulatory (inhibitor) subunit 14c	4.17336	8.55913	0.541196	-0.885778	0.693973	1
ENSMUSG00000019796	Lrp11	low density lipoprotein receptor-related protein 11	90.2041	107.379	0.841529	-0.248915	0.648598	1
ENSMUSG00000019795	Pcmt1	protein-L-isoaspartate (D-aspartate) O-methyltransferase 1	474.051	485.371	0.976726	-0.0339747	0.956437	1
ENSMUSG00000092190	Gm20470	predicted gene 20470	3.42086	5.09511	0.725313	-0.463324	0.826743	1
ENSMUSG00000081497	Gm15560	predicted gene 15560	4.58629	5.78118	0.823793	-0.279646	0.916357	1
ENSMUSG00000039981	Zc3h12d	zinc finger CCCH type containing 12D	75.7535	90.1028	0.842494	-0.247262	0.713875	1
ENSMUSG00000093060	Mir5104	microRNA 5104	2.09402	3.07052	0.760103	-0.395733	0.950007	1
ENSMUSG00000015755	Tab2	TGF-beta activated kinase 1/MAP3K7 binding protein 2	1568.66	1679.08	0.934273	-0.0980839	0.755665	1
ENSMUSG00000053980	Gm9930	predicted gene 9930	2.13804	2.89059	0.806571	-0.310126	0.94801	1
ENSMUSG00000064609	Gm25635	predicted gene, 25635	0.825867	6.86076	0.232276	-2.10609	0.478783	1
ENSMUSG00000050994	Adgb	androglobin	6.2527	18.7611	0.36702	-1.44607	0.379594	1
ENSMUSG00000055493	Epm2a	epilepsy, progressive myoclonic epilepsy, type 2 gene alpha	195.551	216.478	0.903771	-0.145971	0.79541	1
ENSMUSG00000045455	Gm9797	predicted pseudogene 9797	20.6886	28.6133	0.732394	-0.449307	0.64741	1
ENSMUSG00000019817	Plagl1	pleiomorphic adenoma gene-like 1	176.26	262.854	0.671812	-0.57387	0.166344	1
ENSMUSG00000019814	Ltv1	LTV1 ribosome biogenesis factor	332.735	389.735	0.85412	-0.227489	0.486164	1
ENSMUSG00000019810	Fuca2	fucosidase, alpha-L- 2, plasma	1270.17	1673.28	0.759237	-0.397377	0.227975	1
ENSMUSG00000019809	Pex3	peroxisomal biogenesis factor 3	172.135	234.093	0.736454	-0.441332	0.28844	1
ENSMUSG00000019868	Vta1	vesicle (multivesicular body) trafficking 1	172.338	215.355	0.801176	-0.31981	0.404953	1
ENSMUSG00000039910	Cited2	Cbp/p300-interacting transactivator, with Glu/Asp-rich carboxy-terminal domain, 2	1664.35	2101.82	0.791958	-0.336503	0.226249	1
ENSMUSG00000078453	Abracl	ABRA C-terminal like	96.1152	99.7649	0.96378	-0.0532243	0.878672	1
ENSMUSG00000019853	Hebp2	heme binding protein 2	31.2321	38.4437	0.817167	-0.291297	0.707103	1
ENSMUSG00000019852	Arfgef3	ARFGEF family member 3	295.845	296.539	0.99767	-0.00336586	0.976765	1
ENSMUSG00000020003	Pex7	peroxisomal biogenesis factor 7	294.592	377.104	0.781775	-0.355175	0.337556	1
ENSMUSG00000071369	Map3k5	mitogen-activated protein kinase kinase kinase 5	1737.58	1780.1	0.976126	-0.0348606	0.903751	1
ENSMUSG00000019996	Map7	microtubule-associated protein 7	1361.9	2482.19	0.548851	-0.865514	0.0744316	1
ENSMUSG00000019986	Ahi1	Abelson helper integration site 1	376.387	447.906	0.840681	-0.250369	0.505047	1
ENSMUSG00000019977	Hbs1l	Hbs1-like (S. cerevisiae)	374.915	425.558	0.881276	-0.182335	0.608832	1
ENSMUSG00000037542	Aldh8a1	aldehyde dehydrogenase 8 family, member A1	2046.61	3004.35	0.681323	-0.55359	0.367997	1
ENSMUSG00000019970	Sgk1	serum/glucocorticoid regulated kinase 1	4070.99	4443.82	0.91612	-0.126391	0.648983	1
ENSMUSG00000075297	H60b	histocompatibility 60b	12.8303	29.0858	0.459694	-1.12125	0.245951	1
ENSMUSG00000053219	Raet1e	retinoic acid early transcript 1E	4.23206	5.48861	0.806345	-0.310531	1	1
ENSMUSG00000037490	Slc2a12	solute carrier family 2 (facilitated glucose transporter), member 12	156.192	167.372	0.933599	-0.0991248	0.930441	1
ENSMUSG00000071359	Tbpl1	TATA box binding protein-like 1	206.346	249.962	0.826205	-0.275429	0.576859	1
ENSMUSG00000061983	Rps12	ribosomal protein S12	40.2579	40.2884	0.999263	-0.00106294	0.997528	1
ENSMUSG00000070063	Snora33	small nucleolar RNA, H/ACA box 33	37.4114	50.3323	0.74829	-0.418331	0.538576	1
ENSMUSG00000037455	Slc18b1	solute carrier family 18, subfamily B, member 1	187.529	195.03	0.961734	-0.0562902	0.922564	1
ENSMUSG00000085451	Gm15137	predicted gene 15137	2.94923	9.53778	0.374769	-1.41593	0.406058	1
ENSMUSG00000019998	Stx7	syntaxin 7	1325.02	1389.4	0.953691	-0.0684067	0.849566	1
ENSMUSG00000020000	Moxd1	monooxygenase, DBH-like 1	4.15869	7.87305	0.581388	-0.782427	0.750574	1
ENSMUSG00000019989	Enpp3	ectonucleotide pyrophosphatase/phosphodiesterase 3	190.906	286.406	0.667717	-0.582691	0.113888	1
ENSMUSG00000019987	Arg1	arginase, liver	7.09324	13.9468	0.54147	-0.885048	0.507072	1
ENSMUSG00000039166	Akap7	A kinase (PRKA) anchor protein 7	497.012	500.159	0.99372	-0.00908798	0.88662	1
ENSMUSG00000051354	Samd3	sterile alpha motif domain containing 3	3.84847	7.44591	0.574061	-0.800723	0.595382	1
ENSMUSG00000039089	L3mbtl3	l(3)mbt-like 3 (Drosophila)	239.313	278.509	0.859769	-0.217978	0.543039	1
ENSMUSG00000039031	Arhgap18	Rho GTPase activating protein 18	1240.24	1419.13	0.874031	-0.194243	0.536931	1
ENSMUSG00000064208	Gm10145	predicted gene 10145	26.4257	27.3992	0.965721	-0.0503218	0.857405	1
ENSMUSG00000019889	Ptprk	protein tyrosine phosphatase, receptor type, K	1965.99	2623.84	0.749376	-0.416237	0.193106	1
ENSMUSG00000049109	Themis	thymocyte selection associated	15.3959	27.5001	0.575294	-0.79763	0.370349	1
ENSMUSG00000090126	4930519F09Rik	RIKEN cDNA 4930519F09 gene	10.9124	15.6788	0.714221	-0.485558	0.731777	1
ENSMUSG00000019883	Echdc1	enoyl Coenzyme A hydratase domain containing 1	178.979	223.79	0.800654	-0.32075	0.462055	1
ENSMUSG00000075266	Cenpw	centromere protein W	2.55097	4.91518	0.600315	-0.736207	0.713173	1
ENSMUSG00000019791	Hint3	histidine triad nucleotide binding protein 3	206.849	254.495	0.813514	-0.297761	0.494206	1
ENSMUSG00000039697	Ncoa7	nuclear receptor coactivator 7	2824.74	3236.26	0.87288	-0.196145	0.502548	1
ENSMUSG00000088600	Gm24189	predicted gene, 24189	4.60097	5.12875	0.913884	-0.129917	1	1
ENSMUSG00000000295	Hddc2	HD domain containing 2	83.331	108.324	0.771386	-0.374476	0.454748	1
ENSMUSG00000000296	Tpd52l1	tumor protein D52-like 1	215.399	289.935	0.743803	-0.427007	0.303157	1
ENSMUSG00000019782	Rwdd1	RWD domain containing 1	165.499	174.762	0.947294	-0.0781154	0.882354	1
ENSMUSG00000039480	Nt5dc1	5'-nucleotidase domain containing 1	254.185	317.908	0.800184	-0.321596	0.423372	1
ENSMUSG00000039462	Col10a1	collagen, type X, alpha 1	36.4975	42.5265	0.861487	-0.215099	0.779725	1
ENSMUSG00000019779	Frk	fyn-related kinase	397.968	407.866	0.975792	-0.0353544	0.878563	1
ENSMUSG00000063953	Amd2	S-adenosylmethionine decarboxylase 2	49.091	51.0974	0.961488	-0.0566598	0.873704	1
ENSMUSG00000019777	Hdac2	histone deacetylase 2	606.165	689.422	0.87941	-0.185391	0.577755	1
ENSMUSG00000046463	5930403N24Rik	RIKEN cDNA 5930403N24 gene	7.62357	7.83941	0.975582	-0.0356652	1	1
ENSMUSG00000019845	Tube1	epsilon-tubulin 1	15.8822	21.1338	0.762736	-0.390744	0.762183	1
ENSMUSG00000087014	Gm16364	predicted gene 16364	7.0639	8.4582	0.852582	-0.230089	0.836679	1
ENSMUSG00000019841	Rev3l	REV3 like, DNA directed polymerase zeta catalytic subunit	1448.93	1529.82	0.947161	-0.0783178	0.756201	1
ENSMUSG00000080384	Gm22105	predicted gene, 22105	0.412934	4.6226	0.251295	-1.99254	0.438493	1
ENSMUSG00000081608	Gm16210	predicted gene 16210	6.65096	19.2891	0.377096	-1.40699	0.278304	1
ENSMUSG00000038528	Mfsd4b5	major facilitator superfamily domain containing 4B5	2075.74	2530.76	0.820276	-0.285819	0.622044	1
ENSMUSG00000038522	Mfsd4b1	major facilitator superfamily domain containing 4B1	964.937	1056.64	0.913297	-0.130844	0.881386	1
ENSMUSG00000019838	Slc16a10	solute carrier family 16 (monocarboxylic acid transporters), member 10	478.469	671.248	0.713233	-0.487555	0.135293	1
ENSMUSG00000038510	Rpf2	ribosome production factor 2 homolog	70.4881	96.57	0.732685	-0.448735	0.450622	1
ENSMUSG00000019837	Gtf3c6	general transcription factor IIIC, polypeptide 6, alpha	404.288	509.496	0.79391	-0.332953	0.376232	1
ENSMUSG00000065870	Rnu3a	U3A small nuclear RNA	634.732	797.676	0.795983	-0.329191	0.375464	1
ENSMUSG00000075232	Amd1	S-adenosylmethionine decarboxylase 1	193.603	223.768	0.865797	-0.207899	0.588333	1
ENSMUSG00000063428	Ddo	D-aspartate oxidase	544.43	714.008	0.76283	-0.390567	0.261432	1
ENSMUSG00000038446	Cdc40	cell division cycle 40	336.734	413.747	0.814315	-0.296341	0.461277	1
ENSMUSG00000019826	Zbtb24	zinc finger and BTB domain containing 24	300.046	336.017	0.893268	-0.162836	0.67696	1
ENSMUSG00000078451	Ppil6	peptidylprolyl isomerase (cyclophilin)-like 6	36.9398	40.4346	0.915654	-0.127125	0.836999	1
ENSMUSG00000019818	Cd164	CD164 antigen	1948.89	2414.68	0.807182	-0.309033	0.31623	1
ENSMUSG00000075225	Ccdc162	coiled-coil domain containing 162	9.65889	20.673	0.491805	-1.02384	0.303618	1
ENSMUSG00000090708	Gm17196	predicted gene 17196	1.25348	6.14104	0.315567	-1.66398	0.447111	1
ENSMUSG00000091370	5730435O14Rik	RIKEN cDNA 5730435O14 gene	2.50695	3.90288	0.715283	-0.483414	0.85017	1
ENSMUSG00000048756	Foxo3	forkhead box O3	2971.85	3348.42	0.887572	-0.172064	0.598551	1
ENSMUSG00000038302	Lace1	lactation elevated 1	331.532	383.458	0.864936	-0.209335	0.578275	1
ENSMUSG00000081873	Gm15197	predicted gene 15197	11.7969	15.5325	0.774045	-0.36951	0.837833	1
ENSMUSG00000038280	Ostm1	osteopetrosis associated transmembrane protein 1	326.491	378.003	0.864083	-0.210758	0.578056	1
ENSMUSG00000044770	Scml4	sex comb on midleg-like 4 (Drosophila)	26.2329	30.9641	0.851982	-0.231105	0.791619	1
ENSMUSG00000038240	Pdss2	prenyl (solanesyl) diphosphate synthase, subunit 2	204.49	297.571	0.688246	-0.539005	0.284605	1
ENSMUSG00000019797	1700021F05Rik	RIKEN cDNA 1700021F05 gene	267.839	319.405	0.839062	-0.253151	0.497446	1
ENSMUSG00000019863	Qrsl1	glutaminyl-tRNA synthase (glutamine-hydrolyzing)-like 1	127.588	147.207	0.867628	-0.204851	0.633077	1
ENSMUSG00000019864	Rtn4ip1	reticulon 4 interacting protein 1	300.52	391.883	0.767454	-0.381847	0.297317	1
ENSMUSG00000019866	Aim1	absent in melanoma 1	711.274	852	0.835022	-0.260113	0.613285	1
ENSMUSG00000019913	Sim1	single-minded homolog 1 (Drosophila)	778.771	1078.54	0.72232	-0.469291	0.150585	1
ENSMUSG00000062593	Lilrb4a	leukocyte immunoglobulin-like receptor, subfamily B, member 4A	834.626	945.73	0.882645	-0.180096	0.713643	1
ENSMUSG00000019893	Ros1	Ros1 proto-oncogene	8.96509	9.50414	0.948682	-0.0760032	0.944623	1
ENSMUSG00000019891	Dcbld1	discoidin, CUB and LCCL domain containing 1	197.72	242.595	0.815782	-0.293745	0.543078	1
ENSMUSG00000019861	Gopc	golgi associated PDZ and coiled-coil motif containing	735.566	800.255	0.919265	-0.121447	0.690592	1
ENSMUSG00000038624	Nepn	nephrocan	84.9261	147.015	0.580523	-0.784575	0.11068	1
ENSMUSG00000023068	Nus1	NUS1 dehydrodolichyl diphosphate synthase subunit	1669.16	2437.9	0.684799	-0.546247	0.0858847	1
ENSMUSG00000049576	Zfa-ps	zinc finger protein, autosomal, pseudogene	32.2214	43.966	0.738813	-0.436718	0.614439	1
ENSMUSG00000038602	Slc35f1	solute carrier family 35, member F1	135.946	153.032	0.889074	-0.169624	0.801964	1
ENSMUSG00000019857	Asf1a	anti-silencing function 1A histone chaperone	159.718	173.604	0.92047	-0.119557	0.816583	1
ENSMUSG00000019856	Fam184a	family with sequence similarity 184, member A	411.561	610.285	0.674908	-0.567237	0.104896	1
ENSMUSG00000003746	Man1a	mannosidase 1, alpha	1726.37	1797.1	0.960664	-0.0578958	0.875284	1
ENSMUSG00000038122	Tbc1d32	TBC1 domain family, member 32	418.927	483.604	0.866538	-0.206666	0.638661	1
ENSMUSG00000019878	Hsf2	heat shock factor 2	183.636	229.053	0.802581	-0.31728	0.492101	1
ENSMUSG00000019876	Pkib	protein kinase inhibitor beta, cAMP dependent, testis specific	105.141	108.245	0.971587	-0.041585	0.966086	1
ENSMUSG00000019874	Fabp7	fatty acid binding protein 7, brain	54.6478	75.6381	0.726112	-0.461737	0.722258	1
ENSMUSG00000019872	Smpdl3a	sphingomyelin phosphodiesterase, acid-like 3A	1395.13	1826.77	0.763843	-0.388653	0.227188	1
ENSMUSG00000038039	Gcc2	GRIP and coiled-coil domain containing 2	1345.67	1532.52	0.87816	-0.187444	0.566244	1
ENSMUSG00000038010	Ccdc138	coiled-coil domain containing 138	50.5499	68.1366	0.745623	-0.423481	0.534566	1
ENSMUSG00000009654	Oit3	oncoprotein induced transcript 3	4.58629	5.48861	0.860938	-0.216018	1	1
ENSMUSG00000009647	Mcu	mitochondrial calcium uniporter	316.016	399.092	0.792359	-0.335774	0.380937	1
ENSMUSG00000071280	Gm10322	predicted gene 10322	5.85444	7.5132	0.805155	-0.312661	0.939879	1
ENSMUSG00000020111	Micu1	mitochondrial calcium uptake 1	748.174	762.509	0.981225	-0.0273445	0.896939	1
ENSMUSG00000090350	Gm17148	predicted gene 17148	2.4776	4.11646	0.67969	-0.557052	0.935366	1
ENSMUSG00000091941	Gm7399	predicted gene 7399	5.47086	6.1074	0.910439	-0.135365	0.945524	1
ENSMUSG00000020109	Dnajb12	DnaJ heat shock protein family (Hsp40) member B12	1387.47	1467.9	0.945246	-0.0812376	0.805167	1
ENSMUSG00000020107	Anapc16	anaphase promoting complex subunit 16	375.131	400.432	0.936973	-0.0939199	0.739077	1
ENSMUSG00000044475	Ascc1	activating signal cointegrator 1 complex subunit 1	325.38	438.782	0.74214	-0.430237	0.409485	1
ENSMUSG00000020100	Slc29a3	solute carrier family 29 (nucleoside transporters), member 3	808.349	982.181	0.823194	-0.280695	0.606162	1
ENSMUSG00000037202	Prf1	perforin 1 (pore forming protein)	15.5867	24.3623	0.65399	-0.612659	0.533246	1
ENSMUSG00000037171	Nodal	nodal	8.86237	14.0477	0.655405	-0.60954	0.822754	1
ENSMUSG00000020091	Eif4ebp2	eukaryotic translation initiation factor 4E binding protein 2	651.214	734.839	0.886354	-0.174045	0.597932	1
ENSMUSG00000020089	Ppa1	pyrophosphatase (inorganic) 1	280.827	304.187	0.923458	-0.114882	0.766555	1
ENSMUSG00000020087	Tysnd1	trypsin domain containing 1	280.305	357.948	0.783693	-0.35164	0.503128	1
ENSMUSG00000046687	Gm5424	predicted gene 5424	10538.4	18059.1	0.583572	-0.777018	0.195259	1
ENSMUSG00000037012	Hk1	hexokinase 1	3147.37	3170.73	0.992635	-0.0106648	0.957191	1
ENSMUSG00000020079	Supv3l1	suppressor of var1, 3-like 1 (S. cerevisiae)	303.454	370.601	0.819304	-0.28753	0.50346	1
ENSMUSG00000020078	Vps26a	VPS26 retromer complex component A	776.861	853.466	0.910348	-0.13551	0.67345	1
ENSMUSG00000036955	Kif1bp	KIF1 binding protein	693.765	761.112	0.911631	-0.133478	0.728409	1
ENSMUSG00000020076	Ddx50	DEAD (Asp-Glu-Ala-Asp) box polypeptide 50	681.608	718.945	0.948138	-0.0768305	0.8606	1
ENSMUSG00000020074	Ccar1	cell division cycle and apoptosis regulator 1	2136.41	2356.84	0.906512	-0.141602	0.709443	1
ENSMUSG00000080469	Snord98	small nucleolar RNA, C/D box 98	2.4776	2.53073	0.984952	-0.0218747	1	1
ENSMUSG00000047146	Tet1	tet methylcytosine dioxygenase 1	203.788	268.341	0.760332	-0.395299	0.396898	1
ENSMUSG00000071253	Slc25a16	solute carrier family 25 (mitochondrial carrier, Graves disease autoantigen), member 16	673.202	993.225	0.678118	-0.560392	0.103938	1
ENSMUSG00000088875	Gm25862	predicted gene, 25862	3.7751	7.80577	0.542269	-0.882918	0.594478	1
ENSMUSG00000084985	Gm16135	predicted gene 16135	5.98651	7.5132	0.820668	-0.285129	0.941314	1
ENSMUSG00000020069	Hnrnph3	heterogeneous nuclear ribonucleoprotein H3	159.906	168.149	0.951271	-0.0720721	0.892374	1
ENSMUSG00000020064	Herc4	hect domain and RLD 4	682.905	704.743	0.969058	-0.0453456	0.840711	1
ENSMUSG00000089498	Gm26359	predicted gene, 26359	2.93456	6.46726	0.526908	-0.924377	0.648226	1
ENSMUSG00000075000	Nrbf2	nuclear receptor binding factor 2	201.053	208.392	0.964952	-0.0514716	0.959351	1
ENSMUSG00000057134	Ado	2-aminoethanethiol (cysteamine) dioxygenase	390.47	421.846	0.925798	-0.111231	0.730129	1
ENSMUSG00000019945	1700040L02Rik	RIKEN cDNA 1700040L02 gene	238.496	295.897	0.806664	-0.30996	0.467974	1
ENSMUSG00000019944	Rhobtb1	Rho-related BTB domain containing 1	515.155	721.858	0.714048	-0.485907	0.17352	1
ENSMUSG00000090622	A930033H14Rik	RIKEN cDNA A930033H14 gene	48.4873	52.2442	0.929439	-0.105568	0.907795	1
ENSMUSG00000019942	Cdk1	cyclin-dependent kinase 1	6.26738	7.18698	0.887675	-0.171897	1	1
ENSMUSG00000069601	Ank3	ankyrin 3, epithelial	4241.76	6338.65	0.669242	-0.579399	0.064971	1
ENSMUSG00000037762	Slc16a9	solute carrier family 16 (monocarboxylic acid transporters), member 9	257.394	418.066	0.616595	-0.697606	0.235755	1
ENSMUSG00000047692	4930533K18Rik	RIKEN cDNA 4930533K18 gene	5.42683	15.8251	0.381979	-1.38844	0.291539	1
ENSMUSG00000014329	Bicc1	BicC family RNA binding protein 1	3827.56	4623.77	0.827838	-0.272579	0.37879	1
ENSMUSG00000090212	Gm15647	predicted gene 15647	17.2091	29.8056	0.591097	-0.758532	0.429897	1
ENSMUSG00000060733	Ipmk	inositol polyphosphate multikinase	1366.68	1511.27	0.904391	-0.144982	0.638316	1
ENSMUSG00000053830	Gm9923	predicted pseudogene 9923	86.8273	91.3857	0.950659	-0.0730005	0.837818	1
ENSMUSG00000019923	Zwint	ZW10 interactor	722.163	728.54	0.991259	-0.012666	0.989326	1
ENSMUSG00000072407	Gm6419	predicted gene 6419	225.062	307.133	0.733651	-0.446835	0.28015	1
ENSMUSG00000040009	Gnaz	guanine nucleotide binding protein, alpha z subunit	145.604	147.588	0.986648	-0.0193926	1	1
ENSMUSG00000020175	Rab36	RAB36, member RAS oncogene family	46.2298	71.2071	0.654087	-0.612445	0.356872	1
ENSMUSG00000033416	Gucd1	guanylyl cyclase domain containing 1	988.434	1423.73	0.69447	-0.526015	0.230079	1
ENSMUSG00000033427	Upb1	ureidopropionase, beta	545.358	932.826	0.585075	-0.773307	0.181337	1
ENSMUSG00000020180	Snrpd3	small nuclear ribonucleoprotein D3	351.862	387.709	0.907778	-0.139588	0.734196	1
ENSMUSG00000006345	Ggt1	gamma-glutamyltransferase 1	3011.62	4327.6	0.695981	-0.52288	0.327079	1
ENSMUSG00000055872	Gm9985	predicted gene 9985	2.91988	3.43038	0.884774	-0.17662	1	1
ENSMUSG00000020196	Cabin1	calcineurin binding protein 1	1493.04	1575.79	0.947524	-0.0777657	0.801662	1
ENSMUSG00000001666	Ddt	D-dopachrome tautomerase	267.504	405.976	0.659753	-0.600001	0.10323	1
ENSMUSG00000001665	Gstt3	glutathione S-transferase, theta 3	233.348	286.246	0.815843	-0.293637	0.504022	1
ENSMUSG00000001663	Gstt1	glutathione S-transferase, theta 1	395.425	489.465	0.808264	-0.307101	0.391172	1
ENSMUSG00000009093	Gstt4	glutathione S-transferase, theta 4	5.47086	8.91899	0.652371	-0.616236	0.868213	1
ENSMUSG00000033318	Gstt2	glutathione S-transferase, theta 2	651.296	1050.31	0.620462	-0.688585	0.148729	1
ENSMUSG00000033307	Mif	macrophage migration inhibitory factor	327.256	428.302	0.764626	-0.387173	0.285292	1
ENSMUSG00000009092	Derl3	Der1-like domain family, member 3	18.8315	26.3752	0.724433	-0.465077	0.634916	1
ENSMUSG00000049422	Chchd10	coiled-coil-helix-coiled-coil-helix domain containing 10	2370.55	3462.49	0.684727	-0.5464	0.107621	1
ENSMUSG00000049764	Zfp280b	zinc finger protein 280B	149.352	162.221	0.921156	-0.118483	0.833346	1
ENSMUSG00000020229	Slc5a4a	solute carrier family 5, member 4a	10.4407	11.9222	0.885353	-0.175675	0.94807	1
ENSMUSG00000020230	Prmt2	protein arginine N-methyltransferase 2	138.614	166.079	0.835617	-0.259086	0.622435	1
ENSMUSG00000033126	Ybey	ybeY metallopeptidase	43.2365	69.5088	0.62739	-0.672565	0.318561	1
ENSMUSG00000033105	Lss	lanosterol synthase	233.599	288.013	0.811725	-0.300937	0.418816	1
ENSMUSG00000086241	4930483K19Rik	RIKEN cDNA 4930483K19 gene	1.65173	4.26274	0.503869	-0.988879	0.718875	1
ENSMUSG00000085468	Gm15343	predicted gene 15343	11.6502	15.9714	0.745383	-0.423947	0.715017	1
ENSMUSG00000001155	Ftcd	formiminotransferase cyclodeaminase	13.6562	23.271	0.603854	-0.727728	0.464001	1
ENSMUSG00000074919	Gm10787	predicted gene 10787	37.4282	54.674	0.690235	-0.53484	0.481344	1
ENSMUSG00000032977	Fam207a	family with sequence similarity 207, member A	170.678	223.396	0.765067	-0.386343	0.366997	1
ENSMUSG00000000290	Itgb2	integrin beta 2	913.796	1058.15	0.863708	-0.211385	0.594909	1
ENSMUSG00000009291	Pttg1ip	pituitary tumor-transforming 1 interacting protein	2305.64	2333.12	0.988226	-0.0170866	0.965047	1
ENSMUSG00000009293	Ube2g2	ubiquitin-conjugating enzyme E2G 2	183.634	216.063	0.850602	-0.233443	0.575686	1
ENSMUSG00000051652	Lrrc3	leucine rich repeat containing 3	84.6326	125.713	0.6758	-0.565332	0.322717	1
ENSMUSG00000020284	1810043G02Rik	RIKEN cDNA 1810043G02 gene	194.226	252.842	0.769084	-0.378786	0.359018	1
ENSMUSG00000000731	Aire	autoimmune regulator (autoimmune polyendocrinopathy candidiasis ectodermal dystrophy)	1.2388	5.45497	0.346834	-1.52768	0.507592	1
ENSMUSG00000053329	D10Jhu81e	DNA segment, Chr 10, Johns Hopkins University 81 expressed	1052.29	1525.72	0.689907	-0.535527	0.175438	1
ENSMUSG00000001211	Agpat3	1-acylglycerol-3-phosphate O-acyltransferase 3	3555.77	4120.4	0.863001	-0.212566	0.51848	1
ENSMUSG00000065691	n-R5s77	nuclear encoded rRNA 5S 77	4.21738	4.76889	0.904399	-0.144968	1	1
ENSMUSG00000064317	Gm10146	predicted gene 10146	60.8292	86.6168	0.705677	-0.50292	0.331289	1
ENSMUSG00000032788	Pdxk	pyridoxal (pyridoxine, vitamin B6) kinase	1406.06	1805.1	0.779063	-0.360189	0.256831	1
ENSMUSG00000032763	Ilvbl	ilvB (bacterial acetolactate synthase)-like	282.131	286.663	0.984244	-0.0229125	0.969499	1
ENSMUSG00000020312	Shc2	SHC (Src homology 2 domain containing) transforming protein 2	9.11389	10.4038	0.886889	-0.173175	0.987623	1
ENSMUSG00000020308	Tpgs1	tubulin polyglutamylase complex subunit 1	208.999	218.335	0.957437	-0.0627499	0.903889	1
ENSMUSG00000023175	Bsg	basigin	4588.26	5538.84	0.828409	-0.271584	0.385825	1
ENSMUSG00000020331	Hcn2	hyperpolarization-activated, cyclic nucleotide-gated K+ 2	30.6137	42.9537	0.719251	-0.475432	0.587482	1
ENSMUSG00000020329	Polrmt	polymerase (RNA) mitochondrial (DNA directed)	465.402	547.479	0.850355	-0.233862	0.530689	1
ENSMUSG00000035890	Rnf126	ring finger protein 126	304.381	357.366	0.852149	-0.230823	0.480854	1
ENSMUSG00000035863	Palm	paralemmin	1381.26	1768.77	0.781041	-0.35653	0.289823	1
ENSMUSG00000091994	E130317F20Rik	RIKEN cDNA E130317F20 gene	69.308	77.2136	0.898923	-0.153731	0.786983	1
ENSMUSG00000035835	Plppr3	phospholipid phosphatase related 3	78.1683	100.012	0.78375	-0.351534	0.495347	1
ENSMUSG00000013833	Med16	mediator complex subunit 16	376.877	411.059	0.917045	-0.124936	0.747911	1
ENSMUSG00000035773	Kiss1r	KISS1 receptor	28.0921	32.0101	0.88131	-0.182279	0.868548	1
ENSMUSG00000019564	Arid3a	AT rich interactive domain 3A (BRIGHT-like)	351.78	434.926	0.809267	-0.305313	0.435584	1
ENSMUSG00000035754	Wdr18	WD repeat domain 18	292.469	450.697	0.649702	-0.622149	0.0736782	1
ENSMUSG00000035745	Grin3b	glutamate receptor, ionotropic, NMDA3B	25.9687	44.6974	0.590159	-0.760823	0.300611	1
ENSMUSG00000013858	Tmem259	transmembrane protein 259	961.556	1131.9	0.849642	-0.235073	0.454251	1
ENSMUSG00000035697	Hmha1	histocompatibility (minor) HA-1	696.064	758.216	0.918137	-0.123218	0.779245	1
ENSMUSG00000004667	Polr2e	polymerase (RNA) II (DNA directed) polypeptide E	442.879	536.952	0.825128	-0.277311	0.418192	1
ENSMUSG00000075706	Gpx4	glutathione peroxidase 4	224.458	225.229	0.996591	-0.00492587	0.961418	1
ENSMUSG00000003072	Atp5d	ATP synthase, H+ transporting, mitochondrial F1 complex, delta subunit	2216.51	3025.85	0.732612	-0.44888	0.141859	1
ENSMUSG00000035595	1600002K03Rik	RIKEN cDNA 1600002K03 gene	52.0402	60.5225	0.862127	-0.214028	0.721406	1
ENSMUSG00000020153	Ndufs7	NADH dehydrogenase (ubiquinone) Fe-S protein 7	938.662	1283.95	0.731285	-0.451494	0.185283	1
ENSMUSG00000020150	Gamt	guanidinoacetate methyltransferase	80.692	91.5539	0.882642	-0.1801	0.759575	1
ENSMUSG00000069565	Dazap1	DAZ associated protein 1	497.806	555.409	0.896474	-0.157667	0.645958	1
ENSMUSG00000087672	Gm15122	predicted gene 15122	4.20271	16.2186	0.302156	-1.72663	0.221549	1
ENSMUSG00000020133	2310011J03Rik	RIKEN cDNA 2310011J03 gene	149.692	182.006	0.823424	-0.280293	0.48052	1
ENSMUSG00000020131	Pcsk4	proprotein convertase subtilisin/kexin type 4	36.3655	48.454	0.75556	-0.404382	0.56012	1
ENSMUSG00000035504	Reep6	receptor accessory protein 6	246.555	299.565	0.823632	-0.279929	0.672293	1
ENSMUSG00000035486	Plk5	polo-like kinase 5	0.825867	7.15334	0.223941	-2.15881	0.280808	1
ENSMUSG00000035478	Mbd3	methyl-CpG binding domain protein 3	853.286	864.656	0.986866	-0.0190742	1	1
ENSMUSG00000020163	Uqcr11	ubiquinol-cytochrome c reductase, complex III subunit XI	714.915	1028.4	0.695469	-0.523941	0.100095	1
ENSMUSG00000047417	Rexo1	REX1, RNA exonuclease 1	708.25	763.194	0.928102	-0.107645	0.750344	1
ENSMUSG00000003346	Abhd17a	abhydrolase domain containing 17A	298.692	348.231	0.858147	-0.220703	0.563857	1
ENSMUSG00000078441	Scamp4	secretory carrier membrane protein 4	207.849	224.207	0.927364	-0.108792	0.747253	1
ENSMUSG00000003345	Csnk1g2	casein kinase 1, gamma 2	1497.43	1508.19	0.992872	-0.0103205	0.974401	1
ENSMUSG00000003344	Btbd2	BTB (POZ) domain containing 2	438.928	467.151	0.939714	-0.0897057	0.784424	1
ENSMUSG00000020190	Mknk2	MAP kinase-interacting serine/threonine kinase 2	1652.43	1666.02	0.991848	-0.0118095	0.942362	1
ENSMUSG00000055862	Izumo4	IZUMO family member 4	37.2039	46.643	0.80188	-0.318542	0.674517	1
ENSMUSG00000020198	Ap3d1	adaptor-related protein complex 3, delta 1 subunit	3336.1	3366.26	0.991045	-0.0129771	0.980747	1
ENSMUSG00000061589	Dot1l	DOT1-like, histone H3 methyltransferase (S. cerevisiae)	1211.39	1233.06	0.982441	-0.0255579	0.976982	1
ENSMUSG00000075558	Gm17151	predicted gene 17151	8.87705	11.3824	0.797666	-0.326144	0.805406	1
ENSMUSG00000035278	Plekhj1	pleckstrin homology domain containing, family J member 1	147.537	158.971	0.928526	-0.106986	0.844898	1
ENSMUSG00000020211	Sf3a2	splicing factor 3a, subunit 2	314.778	320.551	0.982044	-0.0261409	0.965013	1
ENSMUSG00000035242	Oaz1	ornithine decarboxylase antizyme 1	175.187	178.305	0.982608	-0.025312	0.969958	1
ENSMUSG00000035215	Lsm7	LSM7 homolog, U6 small nuclear RNA and mRNA degradation associated	3.80445	5.45497	0.744303	-0.426039	0.883152	1
ENSMUSG00000035206	Sppl2b	signal peptide peptidase like 2B	255.187	284.987	0.895801	-0.15875	0.732707	1
ENSMUSG00000020219	Timm13	translocase of inner mitochondrial membrane 13	358.194	369.522	0.969428	-0.0447939	0.983747	1
ENSMUSG00000048240	Gng7	guanine nucleotide binding protein (G protein), gamma 7	32.4269	33.7085	0.963076	-0.0542782	0.985825	1
ENSMUSG00000004937	Sgta	small glutamine-rich tetratricopeptide repeat (TPR)-containing, alpha	829.543	926.293	0.895664	-0.15897	0.62854	1
ENSMUSG00000004929	Thop1	thimet oligopeptidase 1	186.202	262.999	0.709102	-0.495934	0.217816	1
ENSMUSG00000035027	Map2k2	mitogen-activated protein kinase kinase 2	1514.79	1694.6	0.893952	-0.16173	0.640584	1
ENSMUSG00000004934	Pias4	protein inhibitor of activated STAT 4	307.772	312.15	0.98602	-0.0203118	0.928337	1
ENSMUSG00000053603	4930442H23Rik	RIKEN cDNA 4930442H23 gene	13.478	21.539	0.642353	-0.638561	0.486139	1
ENSMUSG00000034974	Dapk3	death-associated protein kinase 3	360.418	365.249	0.986811	-0.0191545	0.970556	1
ENSMUSG00000004939	Nmrk2	nicotinamide riboside kinase 2	7.59422	12.6419	0.629985	-0.66661	0.700777	1
ENSMUSG00000004933	Matk	megakaryocyte-associated tyrosine kinase	55.1823	67.057	0.825517	-0.27663	0.681407	1
ENSMUSG00000004931	Apba3	amyloid beta (A4) precursor protein-binding, family A, member 3	257.562	344.103	0.749231	-0.416518	0.286846	1
ENSMUSG00000034917	Tjp3	tight junction protein 3	225.489	263.315	0.856893	-0.222812	0.510545	1
ENSMUSG00000090230	Gm16315	predicted gene 16315	12.1512	18.783	0.664771	-0.58907	0.681319	1
ENSMUSG00000020232	Hmg20b	high mobility group 20B	558.855	569.817	0.980797	-0.0279734	0.950209	1
ENSMUSG00000034854	Mfsd12	major facilitator superfamily domain containing 12	210.416	235.16	0.895223	-0.159681	0.754708	1
ENSMUSG00000020235	Fzr1	fizzy/cell division cycle 20 related 1 (Drosophila)	314.228	365.565	0.859953	-0.217671	0.503068	1
ENSMUSG00000078439	Smim24	small integral membrane protein 24	440.739	818.067	0.53932	-0.890786	0.11461	1
ENSMUSG00000020238	Ncln	nicalin	875.559	966.605	0.905906	-0.142566	0.643699	1
ENSMUSG00000034792	Gna15	guanine nucleotide binding protein, alpha 15	84.0856	88.2362	0.953487	-0.0687147	0.890348	1
ENSMUSG00000054452	Aes	amino-terminal enhancer of split	3442.95	4058.09	0.848453	-0.237093	0.4503	1
ENSMUSG00000054708	Ankrd24	ankyrin repeat domain 24	451.947	667.273	0.677788	-0.561095	0.129674	1
ENSMUSG00000073427	Gm4924	predicted gene 4924	7.47683	9.35785	0.818396	-0.289128	0.883203	1
ENSMUSG00000063320	1190007I07Rik	RIKEN cDNA 1190007I07 gene	36.5856	65.7522	0.563061	-0.828636	0.225921	1
ENSMUSG00000034674	Tdg	thymine DNA glycosylase	58.9113	84.1197	0.703847	-0.506666	0.346218	1
ENSMUSG00000071151	Gm4799	predicted gene 4799	146.757	188.294	0.780571	-0.357397	0.37493	1
ENSMUSG00000020255	D10Wsu102e	DNA segment, Chr 10, Wayne State University 102, expressed	246.444	266.631	0.924573	-0.113141	0.83661	1
ENSMUSG00000034560	A230046K03Rik	RIKEN cDNA A230046K03 gene	999.659	1123.04	0.890231	-0.167748	0.589864	1
ENSMUSG00000020263	Appl2	adaptor protein, phosphotyrosine interaction, PH domain and leucine zipper containing 2	915.951	1249.47	0.733283	-0.447559	0.178901	1
ENSMUSG00000049038	Mterf2	mitochondrial transcription termination factor 2	66.0779	75.7742	0.873704	-0.194784	0.690001	1
ENSMUSG00000050490	Gm8394	predicted gene 8394	233.949	244.991	0.955114	-0.0662546	0.919432	1
ENSMUSG00000001785	Pwp1	PWP1 homolog, endonuclein	245.602	258.544	0.950134	-0.0737976	0.892436	1
ENSMUSG00000001783	Rtcb	RNA 2',3'-cyclic phosphate and 5'-OH ligase	914.968	1003.69	0.911688	-0.133388	0.743502	1
ENSMUSG00000001786	Fbxo7	F-box protein 7	759.768	779.818	0.974322	-0.0375296	0.91916	1
ENSMUSG00000059602	Syn3	synapsin III	299.702	316.131	0.948197	-0.0767412	0.885518	1
ENSMUSG00000087256	Gm15990	predicted gene 15990	15.0711	25.5765	0.60471	-0.725685	0.507689	1
ENSMUSG00000084899	Gm15344	predicted gene 15344	19.0809	60.7141	0.325386	-1.61977	0.062941	1
ENSMUSG00000044937	Ttc41	tetratricopeptide repeat domain 41	58.9574	70.1949	0.842159	-0.247836	0.752406	1
ENSMUSG00000056366	Fabp3-ps1	fatty acid binding protein 3, muscle and heart, pseudogene 1	818.021	1107.79	0.73866	-0.437018	0.17293	1
ENSMUSG00000054027	Nt5dc3	5'-nucleotidase domain containing 3	372.767	373.426	0.998239	-0.00254333	0.965132	1
ENSMUSG00000089656	Gm16271	predicted gene 16271	2.4776	3.54303	0.765482	-0.385561	0.847649	1
ENSMUSG00000035365	Parpbp	PARP1 binding protein	4.23206	6.1074	0.736142	-0.441944	0.804792	1
ENSMUSG00000035351	Nup37	nucleoporin 37	28.0921	45.518	0.625394	-0.677162	0.417488	1
ENSMUSG00000020056	Ccdc53	coiled-coil domain containing 53	170.397	187.709	0.908264	-0.138816	0.730411	1
ENSMUSG00000060002	Chpt1	choline phosphotransferase 1	4316.01	5832.05	0.740094	-0.434219	0.211302	1
ENSMUSG00000020061	Mybpc1	myosin binding protein C, slow-type	4.23206	5.78118	0.771555	-0.374159	0.867642	1
ENSMUSG00000069540	Gm4925	predicted gene 4925	4.23206	4.44267	0.961302	-0.0569376	1	1
ENSMUSG00000004356	Utp20	UTP20 small subunit processome component	889.662	978.031	0.909738	-0.136477	0.686483	1
ENSMUSG00000020062	Slc5a8	solute carrier family 5 (iodide transporter), member 8	411.396	704.909	0.584205	-0.775454	0.132143	1
ENSMUSG00000035189	Ano4	anoctamin 4	20.6006	27.1066	0.768524	-0.379838	0.58777	1
ENSMUSG00000047638	Nr1h4	nuclear receptor subfamily 1, group H, member 4	557.775	866.332	0.644246	-0.634316	0.290742	1
ENSMUSG00000069539	Scyl2	SCY1-like 2 (S. cerevisiae)	831.62	892.899	0.931448	-0.102453	0.766332	1
ENSMUSG00000019948	Actr6	ARP6 actin-related protein 6	82.7734	112.182	0.740168	-0.434075	0.429302	1
ENSMUSG00000019951	Uhrf1bp1l	UHRF1 (ICBP90) binding protein 1-like	1327.22	1714.56	0.774221	-0.369182	0.217858	1
ENSMUSG00000061904	Slc25a3	solute carrier family 25 (mitochondrial carrier, phosphate carrier), member 3	4632.29	6103.39	0.759009	-0.397811	0.181072	1
ENSMUSG00000077167	Gm24119	predicted gene, 24119	1051.1	1246.05	0.84367	-0.24525	0.381695	1
ENSMUSG00000020014	Cfap54	cilia and flagella associated protein 54	77.4807	96.178	0.807597	-0.308293	0.707147	1
ENSMUSG00000015889	Lta4h	leukotriene A4 hydrolase	723.396	730.047	0.990902	-0.0131855	0.997714	1
ENSMUSG00000015890	Amdhd1	amidohydrolase domain containing 1	10.9857	29.4121	0.394111	-1.34333	0.15826	1
ENSMUSG00000036168	Ccdc38	coiled-coil domain containing 38	1.66641	5.78118	0.393207	-1.34664	0.524652	1
ENSMUSG00000020018	Snrpf	small nuclear ribonucleoprotein polypeptide F	65.12	80.5986	0.810307	-0.303459	0.664271	1
ENSMUSG00000090610	Gm3571	predicted gene 3571	116.349	157.599	0.739911	-0.434576	0.362059	1
ENSMUSG00000020020	Usp44	ubiquitin specific peptidase 44	2.10869	5.81483	0.456166	-1.13237	0.645447	1
ENSMUSG00000036112	Metap2	methionine aminopeptidase 2	1511.15	1617.61	0.934227	-0.0981551	0.811853	1
ENSMUSG00000020022	Ndufa12	NADH dehydrogenase (ubiquinone) 1 alpha subcomplex, 12	549.94	747.219	0.736335	-0.441565	0.239851	1
ENSMUSG00000086269	Tmcc3os	transmembrane and coiled coil domains 3, opposite strand	23.1663	23.4392	0.98883	-0.0162054	0.90929	1
ENSMUSG00000020024	Cep83	centrosomal protein 83	339.518	367.801	0.92331	-0.115113	0.78648	1
ENSMUSG00000045867	Cradd	CASP2 and RIPK1 domain containing adaptor with death domain	120.082	129.818	0.925579	-0.111572	0.838267	1
ENSMUSG00000062981	Mrpl42	mitochondrial ribosomal protein L42	431.866	507.45	0.851346	-0.232183	0.532137	1
ENSMUSG00000020029	Nudt4	nudix (nucleoside diphosphate linked moiety X)-type motif 4	11024.6	12434.6	0.886618	-0.173616	0.599972	1
ENSMUSG00000074780	Anapc15-ps	anaphase prompoting complex C subunit 15, pseudogene	74.6154	78.9456	0.945835	-0.0803396	0.898408	1
ENSMUSG00000089994	Gm16239	predicted gene 16239	10.1158	20.3131	0.521549	-0.939126	0.367263	1
ENSMUSG00000046567	4930430F08Rik	RIKEN cDNA 4930430F08 gene	62.7618	82.6232	0.762489	-0.391211	0.551984	1
ENSMUSG00000019888	Mgat4c	MGAT4 family, member C	1.68108	8.52549	0.281464	-1.82898	0.326619	1
ENSMUSG00000035948	Acss3	acyl-CoA synthetase short-chain family member 3	258.713	328.784	0.787523	-0.344606	0.384959	1
ENSMUSG00000019906	Lin7a	lin-7 homolog A (C. elegans)	65.7257	91.1487	0.724109	-0.465721	0.456236	1
ENSMUSG00000065653	Gm23105	predicted gene, 23105	5.94249	12.1358	0.528517	-0.919979	0.586072	1
ENSMUSG00000020186	Csrp2	cysteine and glycine-rich protein 2	1091.46	1097.75	0.994278	-0.00827882	0.964786	1
ENSMUSG00000020189	Osbpl8	oxysterol binding protein-like 8	2301.12	2972.41	0.774235	-0.369156	0.22733	1
ENSMUSG00000087819	Gm25117	predicted gene, 25117	74.1751	83.0957	0.893924	-0.161777	0.825138	1
ENSMUSG00000063334	Krr1	KRR1, small subunit (SSU) processome component, homolog (yeast)	417.175	469.007	0.88972	-0.168577	0.591963	1
ENSMUSG00000035681	Kcnc2	potassium voltage gated channel, Shaw-related subfamily, member 2	17.5633	31.3694	0.573484	-0.802174	0.316677	1
ENSMUSG00000074748	Atxn7l3b	ataxin 7-like 3B	1041.64	1081.19	0.963453	-0.0537145	0.833246	1
ENSMUSG00000020132	Rab21	RAB21, member RAS oncogene family	752.234	773.497	0.972547	-0.0401599	0.900256	1
ENSMUSG00000069520	Tmem19	transmembrane protein 19	596.975	671.934	0.888609	-0.17038	0.612645	1
ENSMUSG00000020137	Thap2	THAP domain containing, apoptosis associated protein 2	126.848	162.559	0.781664	-0.355379	0.417452	1
ENSMUSG00000020166	Cnot2	CCR4-NOT transcription complex, subunit 2	720.832	738.932	0.975538	-0.0357294	0.948539	1
ENSMUSG00000093404	Gm25190	predicted gene, 25190	0.855216	5.09511	0.304378	-1.71606	0.434666	1
ENSMUSG00000034057	Myrfl	myelin regulatory factor-like	2.99325	3.39674	0.908231	-0.138869	0.987208	1
ENSMUSG00000064181	Rab3ip	RAB3A interacting protein	1913.63	2819.46	0.678836	-0.558864	0.0656144	1
ENSMUSG00000031294	D630029K05Rik	RIKEN cDNA D630029K05 gene	199.764	343.306	0.583096	-0.778194	0.20979	1
ENSMUSG00000034024	Cct2	chaperonin containing Tcp1, subunit 2 (beta)	1539.02	1721.01	0.894315	-0.161145	0.598438	1
ENSMUSG00000020171	Yeats4	YEATS domain containing 4	273.754	289.397	0.946134	-0.0798843	0.780947	1
ENSMUSG00000060181	Slc35e3	solute carrier family 35, member E3	188.183	282.345	0.667677	-0.582778	0.131583	1
ENSMUSG00000020212	Mdm1	transformed mouse 3T3 cell double minute 1	88.4937	137.129	0.647899	-0.626159	0.177343	1
ENSMUSG00000055170	Ifng	interferon gamma	8.34672	26.0943	0.34497	-1.53546	0.138491	1
ENSMUSG00000020114	Cand1	cullin associated and neddylation disassociated 1	1293.61	1370.04	0.944256	-0.0827494	0.81043	1
ENSMUSG00000085418	Grip1os1	glutamate receptor interacting protein 1, opposite strand 1	5.04325	9.93128	0.55284	-0.855066	0.691178	1
ENSMUSG00000020228	Helb	helicase (DNA) B	339.629	357.376	0.95048	-0.0732718	0.84965	1
ENSMUSG00000020225	Tmbim4	transmembrane BAX inhibitor motif containing 4	561.624	703.998	0.798051	-0.325448	0.354701	1
ENSMUSG00000020224	Llph	LLP homolog, long-term synaptic facilitation (Aplysia)	83.9514	106.94	0.787023	-0.345522	0.548055	1
ENSMUSG00000034764	1700006J14Rik	RIKEN cDNA 1700006J14 gene	0.427608	7.15334	0.175095	-2.51379	0.202468	1
ENSMUSG00000090191	9230105E05Rik	RIKEN cDNA 9230105E05 gene	12.1805	14.7792	0.835311	-0.259615	0.820448	1
ENSMUSG00000020121	Srgap1	SLIT-ROBO Rho GTPase activating protein 1	219.054	245.835	0.891504	-0.165686	0.681249	1
ENSMUSG00000020123	Avpr1a	arginine vasopressin receptor 1A	108.962	204.897	0.534064	-0.904915	0.34791	1
ENSMUSG00000034613	Ppm1h	protein phosphatase 1H (PP2C domain containing)	2245.63	2907.27	0.772497	-0.372399	0.254647	1
ENSMUSG00000020102	Slc16a7	solute carrier family 16 (monocarboxylic acid transporters), member 7	2284.48	2904.02	0.786735	-0.34605	0.257092	1
ENSMUSG00000025436	Xrcc6bp1	XRCC6 binding protein 1	18.0937	36.0593	0.51522	-0.956741	0.258106	1
ENSMUSG00000040521	Tsfm	Ts translation elongation factor, mitochondrial	201.822	246.746	0.818669	-0.288648	0.465254	1
ENSMUSG00000006732	Mettl1	methyltransferase like 1	118.711	170.432	0.6983	-0.51808	0.254555	1
ENSMUSG00000040502	March9	membrane-associated ring finger (C3HC4) 9	139.576	157.419	0.88737	-0.172393	0.73237	1
ENSMUSG00000006736	Tspan31	tetraspanin 31	309.944	332.395	0.93266	-0.100577	0.831508	1
ENSMUSG00000040462	Os9	amplified in osteosarcoma	3602.28	4090.02	0.880777	-0.183151	0.568587	1
ENSMUSG00000006731	B4galnt1	beta-1,4-N-acetyl-galactosaminyl transferase 1	178.597	225.623	0.792494	-0.335527	0.47042	1
ENSMUSG00000025417	Pip4k2c	phosphatidylinositol-5-phosphate 4-kinase, type II, gamma	1517.66	1656.28	0.916352	-0.126027	0.690898	1
ENSMUSG00000025410	Dctn2	dynactin 2	1141.72	1284.64	0.888832	-0.170018	0.574703	1
ENSMUSG00000025409	Mbd6	methyl-CpG binding domain protein 6	688.852	748.719	0.920148	-0.120063	0.71256	1
ENSMUSG00000092384	Gm4189	predicted gene 4189	2.94923	5.09511	0.647935	-0.626079	0.770906	1
ENSMUSG00000025408	Ddit3	DNA-damage inducible transcript 3	600.096	746.841	0.803776	-0.315134	0.332375	1
ENSMUSG00000040345	Arhgap9	Rho GTPase activating protein 9	80.5033	121.338	0.666216	-0.585938	0.25703	1
ENSMUSG00000025403	Shmt2	serine hydroxymethyltransferase 2 (mitochondrial)	841.769	1407.76	0.598235	-0.741217	0.142274	1
ENSMUSG00000089789	Rdh1	retinol dehydrogenase 1 (all trans)	1.68108	10.73	0.228566	-2.12932	0.202026	1
ENSMUSG00000056148	Rdh9	retinol dehydrogenase 9	12.1512	15.8924	0.778526	-0.361183	0.871673	1
ENSMUSG00000069456	Rdh16	retinol dehydrogenase 16	998.789	1260.47	0.792561	-0.335406	0.500973	1
ENSMUSG00000074639	BC089597	cDNA sequence BC089597	1254.71	1621.11	0.774121	-0.36937	0.563201	1
ENSMUSG00000025395	Prim1	DNA primase, p49 subunit	85.3076	96.1546	0.888353	-0.170794	0.694421	1
ENSMUSG00000061315	Naca	nascent polypeptide-associated complex alpha polypeptide	453.125	526.3	0.861228	-0.215533	0.570558	1
ENSMUSG00000025393	Atp5b	ATP synthase, H+ transporting mitochondrial F1 complex, beta subunit	19815.7	26603.5	0.744864	-0.424952	0.161269	1
ENSMUSG00000064778	Snord59a	small nucleolar RNA, C/D box 59A	15.8676	21.46	0.751005	-0.413106	0.728417	1
ENSMUSG00000044005	Gls2	glutaminase 2 (liver, mitochondrial)	3.81912	10.6174	0.414821	-1.26944	0.564934	1
ENSMUSG00000051346	Spryd4	SPRY domain containing 4	59.6931	78.7876	0.760683	-0.394632	0.587656	1
ENSMUSG00000005682	Pan2	PAN2 poly(A) specific ribonuclease subunit	386.429	434.24	0.890151	-0.167878	0.682145	1
ENSMUSG00000025381	Cnpy2	canopy FGF signaling regulator 2	524.919	619.71	0.847286	-0.239079	0.504432	1
ENSMUSG00000005683	Cs	citrate synthase	2380.6	2647.39	0.899266	-0.153181	0.610771	1
ENSMUSG00000039914	Coq10a	coenzyme Q10A	153.438	191.499	0.802278	-0.317826	0.455176	1
ENSMUSG00000014498	Ankrd52	ankyrin repeat domain 52	718.621	808.498	0.888972	-0.169791	0.618058	1
ENSMUSG00000039878	Slc39a5	solute carrier family 39 (metal ion transporter), member 5	270.472	468.767	0.577886	-0.791144	0.255672	1
ENSMUSG00000025374	Nabp2	nucleic acid binding protein 2	304.44	332.316	0.916367	-0.126002	0.789633	1
ENSMUSG00000025369	Smarcc2	SWI/SNF related, matrix associated, actin dependent regulator of chromatin, subfamily c, member 2	3942.46	4027.18	0.978968	-0.0306662	0.946547	1
ENSMUSG00000018166	Erbb3	erb-b2 receptor tyrosine kinase 3	1035.19	1349.84	0.76707	-0.382569	0.210081	1
ENSMUSG00000025362	Rps26	ribosomal protein S26	242.489	368.77	0.658488	-0.602772	0.0992604	1
ENSMUSG00000049858	Suox	sulfite oxidase	271.916	450.65	0.604265	-0.726748	0.0700539	1
ENSMUSG00000025357	Dgka	diacylglycerol kinase, alpha	340.962	367.117	0.92895	-0.106327	0.714908	1
ENSMUSG00000064030	Pym1	PYM homolog 1, exon junction complex associated factor	95.1907	117.142	0.814195	-0.296553	0.542961	1
ENSMUSG00000045055	Rpsa-ps2	ribosomal protein SA, pseudogene 2	8.86237	16.6238	0.559604	-0.837521	0.443963	1
ENSMUSG00000047090	Tmem198b	transmembrane protein 198b	58.7645	73.457	0.802672	-0.317118	0.58185	1
ENSMUSG00000025353	Ormdl2	ORM1-like 2 (S. cerevisiae)	47.1751	67.5968	0.702293	-0.509854	0.449011	1
ENSMUSG00000025351	Cd63	CD63 antigen	627.291	878.389	0.714463	-0.485068	0.157218	1
ENSMUSG00000025350	Rdh5	retinol dehydrogenase 5	119.355	137.116	0.871405	-0.198584	0.918772	1
ENSMUSG00000090247	Bloc1s1	biogenesis of lysosomal organelles complex-1, subunit 1	80.9435	90.4626	0.895923	-0.158553	0.844861	1
ENSMUSG00000025347	Mettl7b	methyltransferase like 7B	928.238	1195.04	0.776929	-0.364146	0.427694	1
ENSMUSG00000020457	Drg1	developmentally regulated GTP binding protein 1	364.294	368.511	0.988588	-0.016559	0.946994	1
ENSMUSG00000082658	Fau-ps2	Finkel-Biskis-Reilly murine sarcoma virus (FBR-MuSV) ubiquitously expressed (fox derived), pseudogene 2	2.56565	3.25045	0.838887	-0.253452	1	1
ENSMUSG00000020453	Patz1	POZ (BTB) and AT hook containing zinc finger 1	339.988	414.434	0.820798	-0.284901	0.411381	1
ENSMUSG00000084941	Gm11944	predicted gene 11944	41.2599	53.0093	0.782456	-0.353918	0.564247	1
ENSMUSG00000087055	Gm11948	predicted gene 11948	5.10195	10.2239	0.543658	-0.879227	0.589563	1
ENSMUSG00000034579	Pla2g3	phospholipase A2, group III	26.5871	28.1745	0.945591	-0.0807125	1	1
ENSMUSG00000034570	Inpp5j	inositol polyphosphate 5-phosphatase J	365.937	427.165	0.856999	-0.222635	0.56956	1
ENSMUSG00000020434	4921536K21Rik	RIKEN cDNA 4921536K21 gene	20.0409	23.6645	0.853085	-0.229239	0.852165	1
ENSMUSG00000034493	4930556J24Rik	RIKEN cDNA 4930556J24 gene	20.3805	21.3137	0.958177	-0.061636	1	1
ENSMUSG00000049721	Gal3st1	galactose-3-O-sulfotransferase 1	162.417	264.663	0.61513	-0.701038	0.0841484	1
ENSMUSG00000019368	Sec14l4	SEC14-like lipid binding 4	2.93456	6.07376	0.556219	-0.846275	0.606032	1
ENSMUSG00000004748	Mtfp1	mitochondrial fission process 1	116.072	142.944	0.813319	-0.298108	0.533669	1
ENSMUSG00000083838	Gm11957	predicted gene 11957	2.50695	3.21681	0.83166	-0.265935	0.924519	1
ENSMUSG00000003581	Rnf215	ring finger protein 215	205.534	259.928	0.791538	-0.337269	0.397843	1
ENSMUSG00000002129	Sf3a1	splicing factor 3a, subunit 1	1172.46	1229.41	0.953714	-0.068371	0.825148	1
ENSMUSG00000034412	Tbc1d10a	TBC1 domain family, member 10a	368.727	486.124	0.759	-0.397828	0.334188	1
ENSMUSG00000020424	Gatsl3	GATS protein-like 3	83.289	99.6523	0.837428	-0.255963	0.622936	1
ENSMUSG00000058755	Osm	oncostatin M	50.7594	92.1391	0.555722	-0.847565	0.16198	1
ENSMUSG00000085559	Gm11959	predicted gene 11959	2.13804	4.80253	0.540805	-0.88682	0.788679	1
ENSMUSG00000081974	Gm11960	predicted gene 11960	13.7882	15.2853	0.908071	-0.139123	0.900208	1
ENSMUSG00000059534	Uqcr10	ubiquinol-cytochrome c reductase, complex III subunit X	1070.14	1593.15	0.671918	-0.573643	0.0707592	1
ENSMUSG00000009073	Nf2	neurofibromatosis 2	1421.74	1440.61	0.986908	-0.0190129	0.986942	1
ENSMUSG00000034274	Thoc5	THO complex 5	329.033	346.599	0.949466	-0.074812	0.953247	1
ENSMUSG00000009090	Ap1b1	adaptor protein complex AP-1, beta 1 subunit	1629.73	1887.85	0.863349	-0.211985	0.583035	1
ENSMUSG00000034209	Rasl10a	RAS-like, family 10, member A	39.1365	46.8902	0.838095	-0.254814	0.803178	1
ENSMUSG00000009079	Ewsr1	Ewing sarcoma breakpoint region 1	1458.55	1644.75	0.886857	-0.173226	0.604473	1
ENSMUSG00000034175	Rhbdd3	rhomboid domain containing 3	61.5063	97.7959	0.632681	-0.66045	0.262922	1
ENSMUSG00000041961	Znrf3	zinc and ring finger 3	472.521	509.003	0.928466	-0.107079	0.723412	1
ENSMUSG00000020482	Ccdc117	coiled-coil domain containing 117	499.355	703.088	0.710643	-0.492804	0.138373	1
ENSMUSG00000081021	Gm11964	predicted gene 11964	647.46	656.916	0.985627	-0.0208863	0.991418	1
ENSMUSG00000020477	Mrps24	mitochondrial ribosomal protein S24	458.118	548.683	0.835242	-0.259734	0.467859	1
ENSMUSG00000049680	Urgcp	upregulator of cell proliferation	557.193	565.937	0.984576	-0.0224249	0.929052	1
ENSMUSG00000020475	Pgam2	phosphoglycerate mutase 2	674.691	960.077	0.703056	-0.508289	0.144455	1
ENSMUSG00000080904	Gm11966	predicted gene 11966	413.641	514.223	0.80478	-0.313334	0.328745	1
ENSMUSG00000020471	Pold2	polymerase (DNA directed), delta 2, regulatory subunit	124.149	139.996	0.887603	-0.172014	0.772694	1
ENSMUSG00000057897	Camk2b	calcium/calmodulin-dependent protein kinase II, beta	38.3421	43.8533	0.877128	-0.189141	0.936011	1
ENSMUSG00000083022	Rps15a-ps6	ribosomal protein S15A, pseudogene 6	219.44	264.586	0.830015	-0.268791	0.418731	1
ENSMUSG00000083209	Gm11969	predicted gene 11969	4.21738	6.93976	0.65712	-0.60577	0.692617	1
ENSMUSG00000020456	Ogdh	oxoglutarate (alpha-ketoglutarate) dehydrogenase (lipoamide)	6757.3	8271.05	0.817004	-0.291584	0.326821	1
ENSMUSG00000041164	Zmiz2	zinc finger, MIZ-type containing 2	1683.18	1772.6	0.949586	-0.0746299	0.796446	1
ENSMUSG00000041126	H2afv	H2A histone family, member V	358.915	400.544	0.896327	-0.157902	0.608706	1
ENSMUSG00000092885	Gm22123	predicted gene, 22123	18.6093	28.1072	0.673693	-0.569837	0.562876	1
ENSMUSG00000085156	Snhg15	small nucleolar RNA host gene 15	64.2501	66.7425	0.963207	-0.0540828	0.874179	1
ENSMUSG00000084231	Gm11975	predicted gene 11975	3.36217	5.56761	0.664194	-0.590324	0.703242	1
ENSMUSG00000000384	Tbrg4	transforming growth factor beta regulated gene 4	281.51	410.958	0.685773	-0.544197	0.138029	1
ENSMUSG00000083819	Gm11977	predicted gene 11977	57.6138	62.8279	0.918309	-0.122948	0.886606	1
ENSMUSG00000020431	Adcy1	adenylate cyclase 1	462.639	484.696	0.954587	-0.0670513	0.860428	1
ENSMUSG00000020429	Igfbp1	insulin-like growth factor binding protein 1	152.333	155.078	0.982411	-0.0256014	0.91964	1
ENSMUSG00000040985	Sun3	Sad1 and UNC84 domain containing 3	4.20271	11.5624	0.41415	-1.27177	0.391321	1
ENSMUSG00000040978	Gm11992	predicted gene 11992	154.798	194.625	0.796411	-0.328414	0.60715	1
ENSMUSG00000020191	4930415F15Rik	RIKEN cDNA 4930415F15 gene	3.37684	5.45497	0.678058	-0.56052	0.828568	1
ENSMUSG00000018654	Ikzf1	IKAROS family zinc finger 1	305.433	455.883	0.670704	-0.576252	0.149819	1
ENSMUSG00000073145	Gm12000	predicted gene 12000	7.5502	24.5642	0.33446	-1.58009	0.166143	1
ENSMUSG00000020182	Ddc	dopa decarboxylase	334.651	576.149	0.581566	-0.781985	0.0719526	1
ENSMUSG00000086391	1700042O10Rik	RIKEN cDNA 1700042O10 gene	0.412934	4.76889	0.244923	-2.0296	0.389768	1
ENSMUSG00000020173	Cobl	cordon-bleu WH2 repeat	1183.18	1571.52	0.753047	-0.409188	0.216424	1
ENSMUSG00000085091	Egfros	epidermal growth factor receptor, opposite strand	76.2105	87.1668	0.875732	-0.191439	0.873552	1
ENSMUSG00000044966	Fbxo48	F-box protein 48	14.6728	27.8146	0.543918	-0.878539	0.414202	1
ENSMUSG00000033953	Ppp3r1	protein phosphatase 3, regulatory subunit B, alpha isoform (calcineurin B, type I)	661.231	701.772	0.942314	-0.0857203	0.809669	1
ENSMUSG00000020116	Pno1	partner of NOB1 homolog	231.21	267.678	0.864267	-0.210451	0.548799	1
ENSMUSG00000016984	Etaa1	Ewing tumor-associated antigen 1	191.723	197.943	0.968737	-0.0458234	1	1
ENSMUSG00000081302	Gm12020	predicted gene 12020	13.0064	14.0931	0.927999	-0.107805	0.91972	1
ENSMUSG00000082100	Glns-ps1	glutamine synthetase pseudogene 1	681.266	801.266	0.850424	-0.233746	0.503933	1
ENSMUSG00000020142	Slc1a4	solute carrier family 1 (glutamate/neutral amino acid transporter), member 4	66.6396	70.8926	0.940842	-0.0879755	0.87013	1
ENSMUSG00000078965	Gm12033	predicted gene 12033	15.9556	26.5215	0.616087	-0.698795	0.454236	1
ENSMUSG00000049659	Aftph	aftiphilin	1455.11	1584.11	0.918614	-0.12247	0.668864	1
ENSMUSG00000084259	Gm12040	predicted gene 12040	6.2527	6.64719	0.948414	-0.0764111	1	1
ENSMUSG00000089155	Gm23582	predicted gene, 23582	3.33282	3.54303	0.95373	-0.0683479	0.958604	1
ENSMUSG00000081868	Gm12039	predicted gene 12039	9.23128	9.68407	0.95762	-0.0624742	0.980955	1
ENSMUSG00000001891	Ugp2	UDP-glucose pyrophosphorylase 2	997.762	1085.69	0.919087	-0.121726	0.757921	1
ENSMUSG00000020319	Wdpcp	WD repeat containing planar cell polarity effector	179.169	195.997	0.91458	-0.128819	0.825075	1
ENSMUSG00000084081	Gm12057	predicted gene 12057	16.1317	20.8193	0.785163	-0.348936	0.705376	1
ENSMUSG00000051650	B3gnt2	UDP-GlcNAc:betaGal beta-1,3-N-acetylglucosaminyltransferase 2	96.8677	97.515	0.993429	-0.00951111	1	1
ENSMUSG00000092455	Gm20456	predicted gene 20456	20.8207	24.9021	0.84243	-0.247371	0.763123	1
ENSMUSG00000077621	Gm23772	predicted gene, 23772	9.65889	17.1636	0.586826	-0.768995	0.50101	1
ENSMUSG00000092626	9130230N09Rik	RIKEN cDNA 9130230N09 gene	55.0628	73.4234	0.753296	-0.408712	0.466873	1
ENSMUSG00000065869	Gm24917	predicted gene, 24917	3.37684	5.48861	0.674542	-0.56802	0.903445	1
ENSMUSG00000007739	Cct4	chaperonin containing Tcp1, subunit 4 (delta)	957.213	1032.77	0.926908	-0.109502	0.699585	1
ENSMUSG00000049811	Fam161a	family with sequence similarity 161, member A	92.8578	138.175	0.674387	-0.568351	0.217963	1
ENSMUSG00000085665	Gm12059	predicted gene 12059	3.34749	10.2239	0.387344	-1.36831	0.412941	1
ENSMUSG00000089103	Gm23114	predicted gene, 23114	2.99325	3.54303	0.878986	-0.186088	0.905375	1
ENSMUSG00000020280	Pus10	pseudouridylate synthase 10	203.118	215.624	0.942266	-0.0857934	0.867842	1
ENSMUSG00000020275	Rel	reticuloendotheliosis oncogene	443.259	569.94	0.778119	-0.361937	0.323598	1
ENSMUSG00000032985	5730522E02Rik	RIKEN cDNA 5730522E02 gene	1.25348	7.47955	0.265754	-1.91184	0.313867	1
ENSMUSG00000004018	Fancl	Fanconi anemia, complementation group L	50.3591	82.5896	0.61442	-0.702703	0.254753	1
ENSMUSG00000020464	Pnpt1	polyribonucleotide nucleotidyltransferase 1	467.444	485.056	0.963765	-0.0532472	0.890865	1
ENSMUSG00000020463	Smek2	SMEK homolog 2, suppressor of mek1 (Dictyostelium)	835.968	941.196	0.888316	-0.170855	0.582645	1
ENSMUSG00000020462	Cfap36	cilia and flagella associated protein 36	689.101	751.405	0.917195	-0.1247	0.777319	1
ENSMUSG00000032673	Prorsd1	prolyl-tRNA synthetase domain containing 1	149.499	175.854	0.850981	-0.232802	0.587403	1
ENSMUSG00000020459	Mtif2	mitochondrial translational initiation factor 2	367.646	477.126	0.771022	-0.375156	0.320773	1
ENSMUSG00000020460	Rps27a	ribosomal protein S27A	90.2167	90.8679	0.992913	-0.0102614	1	1
ENSMUSG00000020461	Clhc1	clathrin heavy chain linker domain containing 1	1.28282	5.60125	0.345817	-1.53192	0.457918	1
ENSMUSG00000080906	Gm12095	predicted gene 12095	7.04922	9.17792	0.790851	-0.338522	0.842329	1
ENSMUSG00000073073	Gm8098	predicted gene 8098	26.1155	38.1511	0.692585	-0.529937	0.535728	1
ENSMUSG00000040919	4930505A04Rik	RIKEN cDNA 4930505A04 gene	0.855216	7.15334	0.227541	-2.1358	0.280152	1
ENSMUSG00000081712	Gm12096	predicted gene 12096	21.5732	24.2043	0.895609	-0.159059	0.929046	1
ENSMUSG00000081887	Gm12097	predicted gene 12097	148.744	179.699	0.828694	-0.271089	0.593341	1
ENSMUSG00000040850	Psme4	proteasome (prosome, macropain) activator subunit 4	2156.76	2505.1	0.861003	-0.215909	0.485559	1
ENSMUSG00000084146	Gm12104	predicted gene 12104	2.4776	3.7566	0.731111	-0.451837	0.931059	1
ENSMUSG00000020311	Erlec1	endoplasmic reticulum lectin 1	676.183	721.005	0.93792	-0.0924632	0.776357	1
ENSMUSG00000020309	Chac2	ChaC, cation transport regulator 2	118.403	196.145	0.605662	-0.723416	0.219937	1
ENSMUSG00000082213	Gm12102	predicted gene 12102	3.36217	3.43038	0.984603	-0.022386	1	1
ENSMUSG00000020303	Stc2	stanniocalcin 2	37.7363	66.3037	0.575545	-0.796998	0.20803	1
ENSMUSG00000044502	Bod1	biorientation of chromosomes in cell division 1	388.422	483.099	0.804427	-0.313966	0.392863	1
ENSMUSG00000085772	D630024D03Rik	RIKEN cDNA D630024D03 gene	81.107	131.854	0.618024	-0.694265	0.145191	1
ENSMUSG00000020300	Cpeb4	cytoplasmic polyadenylation element binding protein 4	3319.56	3852.81	0.86163	-0.21486	0.494366	1
ENSMUSG00000020297	Nsg2	neuron specific gene family member 2	22.7973	28.6133	0.803602	-0.315447	0.758034	1
ENSMUSG00000040767	Snrnp25	small nuclear ribonucleoprotein 25 (U11/U12)	51.4659	62.9069	0.820973	-0.284594	0.641627	1
ENSMUSG00000020289	Nprl3	nitrogen permease regulator-like 3	220.71	235.7	0.936671	-0.0943857	0.890402	1
ENSMUSG00000020287	Mpg	N-methylpurine-DNA glycosylase	60.5944	75.6162	0.803935	-0.314849	0.645436	1
ENSMUSG00000069919	Hba-a1	hemoglobin alpha, adult chain 1	852.435	1311.45	0.65026	-0.620911	0.711868	1
ENSMUSG00000020272	Stk10	serine/threonine kinase 10	1323.52	1517.52	0.872247	-0.197192	0.492188	1
ENSMUSG00000057967	Fgf18	fibroblast growth factor 18	5.86912	12.1358	0.522931	-0.935307	0.58609	1
ENSMUSG00000040594	Ranbp17	RAN binding protein 17	22.0155	28.3325	0.784642	-0.349894	0.628428	1
ENSMUSG00000069913	Anp32-ps	acidic (leucine-rich) nuclear phosphoprotein 32 family, pseudogene	170.246	174.335	0.97668	-0.0340422	0.934249	1
ENSMUSG00000086243	Gm12121	predicted gene 12121	54.239	59.421	0.914235	-0.129363	0.814638	1
ENSMUSG00000047861	Foxi1	forkhead box I1	301.972	497.817	0.607382	-0.719324	0.353625	1
ENSMUSG00000020143	Dock2	dedicator of cyto-kinesis 2	1212.76	1449.73	0.836653	-0.257299	0.551466	1
ENSMUSG00000069911	Fam196b	family with sequence similarity 196, member B	114.907	128.525	0.894863	-0.160261	0.724002	1
ENSMUSG00000069910	Spdl1	spindle apparatus coiled-coil protein 1	14.6434	23.3383	0.64275	-0.637671	0.562394	1
ENSMUSG00000082309	Gm12123	predicted gene 12123	4.27608	10.4374	0.461299	-1.11623	0.588773	1
ENSMUSG00000018846	Pank3	pantothenate kinase 3	1004.48	1114.55	0.901329	-0.149875	0.659927	1
ENSMUSG00000018849	Wwc1	WW, C2 and coiled-coil domain containing 1	3368.63	4677.02	0.720313	-0.473305	0.135526	1
ENSMUSG00000049336	Tenm2	teneurin transmembrane protein 2	68.8636	80.7566	0.854532	-0.226794	0.662117	1
ENSMUSG00000042032	Mat2b	methionine adenosyltransferase II, beta	529.853	588.129	0.901082	-0.150269	0.631799	1
ENSMUSG00000020330	Hmmr	hyaluronan mediated motility receptor (RHAMM)	19.171	28.6133	0.681147	-0.553962	0.580742	1
ENSMUSG00000020328	Nudcd2	NudC domain containing 2	165.708	270.68	0.61362	-0.704583	0.0951093	1
ENSMUSG00000020326	Ccng1	cyclin G1	1978.44	2116.98	0.93459	-0.097595	0.802118	1
ENSMUSG00000055415	Atp10b	ATPase, class V, type 10B	82.2976	132.855	0.622299	-0.684319	0.16308	1
ENSMUSG00000084889	Gm12148	predicted gene 12148	2.10869	4.11646	0.607587	-0.718838	0.868542	1
ENSMUSG00000044707	Ccnjl	cyclin J-like	29.006	31.7292	0.916796	-0.125328	0.820201	1
ENSMUSG00000041278	Ttc1	tetratricopeptide repeat domain 1	529.872	555.678	0.953643	-0.068479	0.884734	1
ENSMUSG00000004296	Il12b	interleukin 12b	16.3979	16.5902	0.989068	-0.0158582	0.912143	1
ENSMUSG00000041231	Ublcp1	ubiquitin-like domain containing CTD phosphatase 1	81.696	101.531	0.80655	-0.310165	0.551766	1
ENSMUSG00000080981	Gm12161	predicted gene 12161	29.9053	39.8495	0.756564	-0.402466	0.633808	1
ENSMUSG00000006169	Clint1	clathrin interactor 1	2686.27	2899.69	0.926425	-0.110254	0.71465	1
ENSMUSG00000069899	Gm12166	predicted gene 12166	1.25348	6.14104	0.315567	-1.66398	0.447111	1
ENSMUSG00000020411	Nipal4	NIPA-like domain containing 4	4.64499	5.27504	0.899595	-0.152653	0.983083	1
ENSMUSG00000020340	Cyfip2	cytoplasmic FMR1 interacting protein 2	6916.59	9750.99	0.709352	-0.495427	0.142107	1
ENSMUSG00000048721	Fndc9	fibronectin type III domain containing 9	26.367	36.3182	0.733342	-0.447442	0.526586	1
ENSMUSG00000081078	Gm12568	predicted gene 12568	29.377	46.564	0.638655	-0.64689	0.653493	1
ENSMUSG00000020395	Itk	IL2 inducible T cell kinase	69.9578	173.696	0.406179	-1.29981	0.164824	1
ENSMUSG00000020397	Med7	mediator complex subunit 7	76.1371	80.2622	0.949237	-0.0751598	0.814065	1
ENSMUSG00000040413	Timd2	T cell immunoglobulin and mucin domain containing 2	19.6133	25.7345	0.771039	-0.375124	0.655137	1
ENSMUSG00000040405	Havcr1	hepatitis A virus cellular receptor 1	154.653	190.241	0.813912	-0.297055	0.717159	1
ENSMUSG00000055546	Timd4	T cell immunoglobulin and mucin domain containing 4	6.66564	20.9202	0.349706	-1.51578	0.190115	1
ENSMUSG00000020372	Rack1	receptor for activated C kinase 1	3248.59	3408.58	0.953077	-0.069336	0.788006	1
ENSMUSG00000040365	Trim41	tripartite motif-containing 41	453.993	514.536	0.882564	-0.180227	0.61672	1
ENSMUSG00000086245	Gm16170	predicted gene 16170	55.4631	226.487	0.248204	-2.0104	0.0696883	1
ENSMUSG00000047511	Olfr1396	olfactory receptor 1396	17.7834	20.0425	0.892643	-0.163845	1	1
ENSMUSG00000046311	Zfp62	zinc finger protein 62	624.141	631.15	0.988913	-0.0160848	0.951341	1
ENSMUSG00000020346	Mgat1	mannoside acetylglucosaminyltransferase 1	932.653	1018.26	0.916007	-0.126569	0.684522	1
ENSMUSG00000064057	Scgb3a1	secretoglobin, family 3A, member 1	6.76835	10.6174	0.668685	-0.580601	0.825541	1
ENSMUSG00000020362	Cnot6	CCR4-NOT transcription complex, subunit 6	828.879	901.165	0.919874	-0.120491	0.732639	1
ENSMUSG00000020366	Mapk9	mitogen-activated protein kinase 9	635.332	742.892	0.855409	-0.225314	0.49944	1
ENSMUSG00000065417	Mir340	microRNA 340	2.06467	4.11646	0.598983	-0.739414	0.868306	1
ENSMUSG00000085192	Gm12195	predicted gene 12195	8.43476	9.864	0.868443	-0.203497	0.910234	1
ENSMUSG00000020381	3010026O09Rik	RIKEN cDNA 3010026O09 gene	67.7443	92.1274	0.738175	-0.437965	0.460495	1
ENSMUSG00000020377	Ltc4s	leukotriene C4 synthase	38.6209	45.777	0.847017	-0.239537	0.758182	1
ENSMUSG00000020368	Canx	calnexin	9736.4	10115.7	0.962505	-0.0551346	0.896934	1
ENSMUSG00000050087	Cby3	chibby homolog 3 (Drosophila)	1.71043	6.17469	0.377777	-1.40439	0.631572	1
ENSMUSG00000020375	Rufy1	RUN and FYVE domain containing 1	912.639	942.017	0.968847	-0.0456589	0.886605	1
ENSMUSG00000048728	Zfp454	zinc finger protein 454	34.8311	59.1167	0.596026	-0.746553	0.242035	1
ENSMUSG00000020364	Zfp354a	zinc finger protein 354A	69.1298	92.7915	0.747721	-0.419429	0.409093	1
ENSMUSG00000045942	BC049762	cDNA sequence BC049762	2.90521	4.55532	0.702968	-0.50847	0.769719	1
ENSMUSG00000020385	Clk4	CDC like kinase 4	1095.74	1164.57	0.940946	-0.0878159	0.759426	1
ENSMUSG00000093734	Gm25082	predicted gene, 25082	9.20193	10.8426	0.861457	-0.215149	0.836002	1
ENSMUSG00000020359	Phykpl	5-phosphohydroxy-L-lysine phospholyase	725.473	813.266	0.892182	-0.16459	0.668179	1
ENSMUSG00000001056	Nhp2	NHP2 ribonucleoprotein	169.586	203.714	0.833291	-0.263108	0.522729	1
ENSMUSG00000052563	D930048N14Rik	RIKEN cDNA D930048N14 gene	55.6245	65.8985	0.846425	-0.240546	0.745515	1
ENSMUSG00000007777	0610009B22Rik	RIKEN cDNA 0610009B22 gene	45.0224	58.5769	0.772487	-0.372418	0.551272	1
ENSMUSG00000036391	Sec24a	Sec24 related gene family, member A (S. cerevisiae)	633.934	855.706	0.741134	-0.432194	0.16784	1
ENSMUSG00000084744	Gm25291	predicted gene, 25291	73.4834	97.5706	0.755635	-0.404239	0.676086	1
ENSMUSG00000020386	Sar1b	secretion associated Ras related GTPase 1B	354.314	413.331	0.857561	-0.221688	0.563195	1
ENSMUSG00000020390	Ube2b	ubiquitin-conjugating enzyme E2B	798.041	918.916	0.868602	-0.203232	0.506028	1
ENSMUSG00000086493	Gm12204	predicted gene 12204	2.07934	6.64719	0.402676	-1.31231	0.529348	1
ENSMUSG00000036309	Skp1a	S-phase kinase-associated protein 1A	2449.43	2748.53	0.89122	-0.166147	0.555494	1
ENSMUSG00000086920	Gm12207	predicted gene 12207	66.5369	82.8822	0.80514	-0.312688	0.606866	1
ENSMUSG00000020402	Vdac1	voltage-dependent anion channel 1	3394.73	4635.08	0.732457	-0.449185	0.146995	1
ENSMUSG00000036275	9530068E07Rik	RIKEN cDNA 9530068E07 gene	1375.12	1558.11	0.882637	-0.180108	0.578032	1
ENSMUSG00000058073	Gm11189	predicted gene 11189	13.9056	23.2257	0.615282	-0.70068	0.570941	1
ENSMUSG00000020361	Hspa4	heat shock protein 4	3388.42	3540.98	0.956926	-0.0635211	0.819916	1
ENSMUSG00000064719	Gm25930	predicted gene, 25930	7.0639	9.39149	0.776009	-0.365854	0.900524	1
ENSMUSG00000044894	Uqcrq	ubiquinol-cytochrome c reductase, complex III subunit VII	1647.93	2188.27	0.753188	-0.408918	0.176198	1
ENSMUSG00000044352	Sowaha	sosondowah ankyrin repeat domain family member A	64.3989	101.946	0.635273	-0.65455	0.312444	1
ENSMUSG00000000869	Il4	interleukin 4	0.825867	9.75135	0.169827	-2.55786	0.18848	1
ENSMUSG00000020380	Rad50	RAD50 double strand break repair protein	642.429	649.606	0.988969	-0.0160032	0.963979	1
ENSMUSG00000036117	Il5	interleukin 5	2.89054	6.07376	0.549996	-0.862508	0.649186	1
ENSMUSG00000018900	Slc22a5	solute carrier family 22 (organic cation transporter), member 5	1338.49	1976.35	0.677416	-0.561885	0.157175	1
ENSMUSG00000063652	Slc22a21	solute carrier family 22 (organic cation transporter), member 21	54.6772	59.9154	0.914008	-0.129722	0.810695	1
ENSMUSG00000080768	Gm12219	predicted gene 12219	13.0064	15.06	0.872127	-0.19739	1	1
ENSMUSG00000020334	Slc22a4	solute carrier family 22 (organic cation transporter), member 4	388.309	606.663	0.640666	-0.642355	0.0706226	1
ENSMUSG00000036045	Gm12221	predicted gene 12221	14.6434	20.3804	0.731671	-0.450733	0.64584	1
ENSMUSG00000018916	Csf2	colony stimulating factor 2 (granulocyte-macrophage)	2.06467	3.54303	0.674588	-0.567922	0.788181	1
ENSMUSG00000035992	Fnip1	folliculin interacting protein 1	1197.83	1226.4	0.976726	-0.0339741	0.927479	1
ENSMUSG00000088437	Gm24198	predicted gene, 24198	5.0139	9.864	0.553562	-0.853182	0.59	1
ENSMUSG00000093341	Gm26116	predicted gene, 26116	3.39151	4.94882	0.738216	-0.437885	0.898494	1
ENSMUSG00000052298	Cdc42se2	CDC42 small effector 2	942	943.231	0.998696	-0.00188278	0.993219	1
ENSMUSG00000020267	Hint1	histidine triad nucleotide binding protein 1	1754.4	2029.26	0.864617	-0.209866	0.558707	1
ENSMUSG00000000594	Gm2a	GM2 ganglioside activator protein	1693.84	2849.87	0.594497	-0.750258	0.073077	1
ENSMUSG00000044751	Gm12231	predicted gene 12231	1727.7	2404.69	0.718589	-0.476761	0.131815	1
ENSMUSG00000049491	Slc36a3	solute carrier family 36 (proton/amino acid symporter), member 3	5.92781	7.80577	0.786736	-0.346049	0.820725	1
ENSMUSG00000085531	Slc36a3os	solute carrier family 36 (proton/amino acid symporter), member 3, opposite strand	0	6.79348	0.128312	-2.96227	0.120439	1
ENSMUSG00000055333	Fat2	FAT atypical cadherin 2	10.9417	17.8833	0.632394	-0.661104	0.58967	1
ENSMUSG00000018585	Atox1	antioxidant 1 copper chaperone	501.77	597.609	0.839896	-0.251718	0.471528	1
ENSMUSG00000018583	G3bp1	GTPase activating protein (SH3 domain) binding protein 1	887.348	901.752	0.984044	-0.0232053	0.917119	1
ENSMUSG00000020523	Fam114a2	family with sequence similarity 114, member A2	742.594	813.862	0.91254	-0.132041	0.720068	1
ENSMUSG00000085719	4933424L21Rik	RIKEN cDNA 4933424L21 gene	2.93456	9.97664	0.358448	-1.48016	0.317509	1
ENSMUSG00000086933	4933426K07Rik	RIKEN cDNA 4933426K07 gene	26.2936	26.5215	0.991721	-0.0119934	1	1
ENSMUSG00000077155	Gm24582	predicted gene, 24582	1.2388	6.28733	0.307218	-1.70266	0.404203	1
ENSMUSG00000084223	Gm12244	predicted gene 12244	2.12336	3.07052	0.767313	-0.382112	0.950432	1
ENSMUSG00000083657	Gm12245	predicted gene 12245	9.61487	9.71771	0.990404	-0.0139104	1	1
ENSMUSG00000037331	Larp1	La ribonucleoprotein domain family, member 1	2568.1	2799.09	0.917508	-0.124208	0.709602	1
ENSMUSG00000081223	Gm12247	predicted gene 12247	8.3027	8.3792	0.991843	-0.0118161	0.965814	1
ENSMUSG00000020515	Cnot8	CCR4-NOT transcription complex, subunit 8	659.299	686.453	0.960501	-0.0581411	0.873532	1
ENSMUSG00000037275	Gemin5	gem (nuclear organelle) associated protein 5	397.27	402.838	0.986212	-0.0200305	0.938482	1
ENSMUSG00000087629	Gm12246	predicted gene 12246	3.33282	4.73525	0.755472	-0.40455	0.824001	1
ENSMUSG00000037243	Zfp692	zinc finger protein 692	157.992	213.914	0.739796	-0.434801	0.345816	1
ENSMUSG00000049755	Zfp672	zinc finger protein 672	422.644	542.777	0.779075	-0.360165	0.321821	1
ENSMUSG00000087347	1700047K16Rik	RIKEN cDNA 1700047K16 gene	7.96313	8.4582	0.947657	-0.0775631	0.913321	1
ENSMUSG00000013646	Sh3bp5l	SH3 binding domain protein 5 like	321.779	419.721	0.767203	-0.382319	0.26507	1
ENSMUSG00000084384	Gm12251	predicted gene 12251	312.405	408.069	0.766141	-0.384319	0.247178	1
ENSMUSG00000072915	Gm12258	predicted gene 12258	39.8744	39.9285	0.998677	-0.00190948	0.979058	1
ENSMUSG00000020491	2810021J22Rik	RIKEN cDNA 2810021J22 gene	64.2501	78.7657	0.818022	-0.289789	0.620789	1
ENSMUSG00000020490	Btnl10	butyrophilin-like 10	5.47086	8.96435	0.649401	-0.622819	0.631502	1
ENSMUSG00000020496	Rnf187	ring finger protein 187	1494.34	1575.63	0.948443	-0.076367	0.820872	1
ENSMUSG00000056895	Hist3h2ba	histone cluster 3, H2ba	12.1365	13.1481	0.928499	-0.107027	1	1
ENSMUSG00000080712	Hist3h2bb-ps	histone cluster 3, H2bb, pseudogene	2.09402	5.06147	0.51044	-0.970186	0.597025	1
ENSMUSG00000078851	Hist3h2a	histone cluster 3, H2a	57.4377	104.961	0.551502	-0.858562	0.116809	1
ENSMUSG00000080152	Gm12260	predicted gene 12260	5.0139	7.77213	0.685569	-0.544626	0.681634	1
ENSMUSG00000020455	Trim11	tripartite motif-containing 11	357.029	444.553	0.803561	-0.315521	0.446689	1
ENSMUSG00000049287	Iba57	IBA57 homolog, iron-sulfur cluster assembly	153.851	179.565	0.857589	-0.221641	0.645338	1
ENSMUSG00000043448	Gjc2	gap junction protein, gamma 2	2.12336	3.72296	0.661316	-0.596589	0.788142	1
ENSMUSG00000020444	Guk1	guanylate kinase 1	411.545	474.551	0.867508	-0.205052	0.55853	1
ENSMUSG00000085882	2610507I01Rik	RIKEN cDNA 2610507I01 gene	45.9783	51.8171	0.889452	-0.169011	0.759727	1
ENSMUSG00000036860	Mrpl55	mitochondrial ribosomal protein L55	172.693	252.2	0.68599	-0.54374	0.233316	1
ENSMUSG00000000126	Wnt9a	wingless-type MMTV integration site family, member 9A	14.8049	20.7739	0.725861	-0.462234	0.681222	1
ENSMUSG00000009894	Snap47	synaptosomal-associated protein, 47	552.623	649.876	0.850583	-0.233477	0.51284	1
ENSMUSG00000036819	Jmjd4	jumonji domain containing 4	228.938	293.051	0.781964	-0.354826	0.3798	1
ENSMUSG00000084145	Gm12263	predicted gene 12263	150.648	161.13	0.935346	-0.0964274	0.900437	1
ENSMUSG00000020472	Zkscan17	zinc finger with KRAB and SCAN domains 17	351.833	382.84	0.919219	-0.121519	0.755139	1
ENSMUSG00000032691	Nlrp3	NLR family, pyrin domain containing 3	367.664	402.916	0.912726	-0.131746	0.784867	1
ENSMUSG00000032633	Flcn	folliculin	513.323	691.975	0.742196	-0.430127	0.209952	1
ENSMUSG00000019373	Cops3	COP9 signalosome subunit 3	286.535	384.2	0.746455	-0.421872	0.2758	1
ENSMUSG00000032615	Nt5m	5',3'-nucleotidase, mitochondrial	103.02	110.27	0.934844	-0.0972024	0.876623	1
ENSMUSG00000000301	Pemt	phosphatidylethanolamine N-methyltransferase	5.82509	9.03163	0.680357	-0.555636	0.771994	1
ENSMUSG00000020538	Srebf1	sterol regulatory element binding transcription factor 1	650.493	851.958	0.763804	-0.388725	0.247437	1
ENSMUSG00000000538	Tom1l2	target of myb1-like 2 (chicken)	1697.82	1986.33	0.854826	-0.226298	0.454939	1
ENSMUSG00000082148	Gm12266	predicted gene 12266	39.9331	74.1095	0.544979	-0.875728	0.147825	1
ENSMUSG00000056598	Lrrc48	leucine rich repeat containing 48	20.5419	49.7471	0.424495	-1.23618	0.118735	1
ENSMUSG00000042709	Atpaf2	ATP synthase mitochondrial F1 complex assembly factor 2	262.607	311.823	0.842674	-0.246954	0.586459	1
ENSMUSG00000084249	Gm12267	predicted gene 12267	0	6.28733	0.137224	-2.86539	0.145411	1
ENSMUSG00000020537	Drg2	developmentally regulated GTP binding protein 2	319.672	471.188	0.679119	-0.558264	0.118971	1
ENSMUSG00000042678	Myo15	myosin XV	13.0944	19.7616	0.678869	-0.558796	0.636275	1
ENSMUSG00000042650	Alkbh5	alkB homolog 5, RNA demethylase	3346.44	3647.76	0.917418	-0.124349	0.682259	1
ENSMUSG00000018599	Mief2	mitochondrial elongation factor 2	102.118	140.3	0.729781	-0.454464	0.331435	1
ENSMUSG00000049323	Smcr8	Smith-Magenis syndrome chromosome region, candidate 8 homolog (human)	1120.82	1272.82	0.880676	-0.183317	0.550612	1
ENSMUSG00000020534	Shmt1	serine hydroxymethyltransferase 1 (soluble)	1012.43	1235.04	0.819896	-0.286487	0.41192	1
ENSMUSG00000042569	Dhrs7b	dehydrogenase/reductase (SDR family) member 7B	170.957	212.813	0.804241	-0.314299	0.459615	1
ENSMUSG00000018931	Natd1	N-acetyltransferase domain containing 1	338.625	369.984	0.915471	-0.127415	0.736079	1
ENSMUSG00000042529	Kcnj12	potassium inwardly-rectifying channel, subfamily J, member 12	35.242	42.7854	0.827718	-0.272789	0.709927	1
ENSMUSG00000010025	Aldh3a2	aldehyde dehydrogenase family 3, subfamily A2	942.31	1025.19	0.919233	-0.121497	0.71229	1
ENSMUSG00000069855	Slc47a2	solute carrier family 47, member 2	2.94923	4.44267	0.725605	-0.462743	0.91508	1
ENSMUSG00000060808	B9d1os	B9 protein domain 1, opposite strand	2.5363	4.58896	0.632729	-0.66034	0.77938	1
ENSMUSG00000042377	Fam83g	family with sequence similarity 83, member G	314.004	525.05	0.598809	-0.739832	0.142299	1
ENSMUSG00000020528	Prpsap2	phosphoribosyl pyrophosphate synthetase-associated protein 2	87.846	100.012	0.879558	-0.18515	0.730218	1
ENSMUSG00000014243	Zswim7	zinc finger SWIM-type containing 7	22.7827	53.1102	0.439523	-1.18599	0.111731	1
ENSMUSG00000042298	Ttc19	tetratricopeptide repeat domain 19	443.525	489.712	0.905877	-0.142613	0.701679	1
ENSMUSG00000081340	Gm12275	predicted gene 12275	8.44944	12.541	0.697838	-0.519036	0.644279	1
ENSMUSG00000018501	Ncor1	nuclear receptor co-repressor 1	7078.09	7444.29	0.950814	-0.0727647	0.81977	1
ENSMUSG00000081944	Gm12276	predicted gene 12276	20.6153	31.2567	0.670102	-0.577548	0.478548	1
ENSMUSG00000014245	Pigl	phosphatidylinositol glycan anchor biosynthesis, class L	114.064	119.954	0.951308	-0.0720161	0.904613	1
ENSMUSG00000018509	Cenpv	centromere protein V	76.2272	78.3268	0.973532	-0.0386999	1	1
ENSMUSG00000086841	2410006H16Rik	RIKEN cDNA 2410006H16 gene	158.758	191.815	0.828555	-0.271331	0.455007	1
ENSMUSG00000064437	Snord49b	small nucleolar RNA, C/D box 49B	7.59422	10.4828	0.748444	-0.418034	0.692933	1
ENSMUSG00000085762	Lrrc75aos2	leucine rich repeat containing 75A, opposite strand 2	13.8176	27.3202	0.523216	-0.934522	0.296717	1
ENSMUSG00000048497	Mmgt2	membrane magnesium transporter 2	96.721	98.7409	0.979748	-0.0295172	1	1
ENSMUSG00000084020	Wsb2-ps	WD repeat and SOCS box-containing 2, pseudogene	156.842	174.054	0.901673	-0.149324	0.693193	1
ENSMUSG00000047342	Zfp286	zinc finger protein 286	23.8894	34.2482	0.706118	-0.50202	0.593946	1
ENSMUSG00000090173	Fbxw10	F-box and WD-40 domain protein 10	14.2452	15.4989	0.924012	-0.114016	0.97555	1
ENSMUSG00000070407	Hs3st3b1	heparan sulfate (glucosamine) 3-O-sulfotransferase 3B1	314.826	317.561	0.991413	-0.0124419	0.904455	1
ENSMUSG00000042148	Cox10	cytochrome c oxidase assembly protein 10	331.025	357.161	0.927027	-0.109317	0.846715	1
ENSMUSG00000033352	Map2k4	mitogen-activated protein kinase kinase 4	677.933	702.064	0.965678	-0.0503863	0.883128	1
ENSMUSG00000076460	Mir744	microRNA 744	0.427608	4.76889	0.247467	-2.01469	0.389211	1
ENSMUSG00000018347	Zkscan6	zinc finger with KRAB and SCAN domains 6	161.267	167.081	0.965408	-0.0507899	0.870441	1
ENSMUSG00000020910	Adprm	ADP-ribose/CDP-alcohol diphosphatase, manganese dependent	114.683	138.996	0.82633	-0.27521	0.566803	1
ENSMUSG00000020908	Myh3	myosin, heavy polypeptide 3, skeletal muscle, embryonic	1.26815	4.04917	0.449212	-1.15453	0.588127	1
ENSMUSG00000056328	Myh1	myosin, heavy polypeptide 1, skeletal muscle, adult	9.65889	15.7915	0.63478	-0.655671	0.563779	1
ENSMUSG00000020905	Usp43	ubiquitin specific peptidase 43	57.3937	62.9069	0.91373	-0.130161	0.826329	1
ENSMUSG00000055134	9130017K11Rik	RIKEN cDNA 9130017K11 gene	10.795	21.539	0.523314	-0.934252	0.348231	1
ENSMUSG00000020903	Stx8	syntaxin 8	271.675	292.691	0.928441	-0.107118	0.810244	1
ENSMUSG00000087242	C78197	expressed sequence C78197	30.9093	35.5195	0.873761	-0.19469	0.796059	1
ENSMUSG00000020901	Pik3r5	phosphoinositide-3-kinase, regulatory subunit 5, p101	321.732	358.22	0.898426	-0.154529	0.771762	1
ENSMUSG00000018736	Ndel1	nudE neurodevelopment protein 1 like 1	1637.05	1967.47	0.832141	-0.2651	0.441354	1
ENSMUSG00000060938	Rpl26	ribosomal protein L26	601.981	744.828	0.808472	-0.30673	0.33431	1
ENSMUSG00000032921	Odf4	outer dense fiber of sperm tails 4	3.30347	6.61355	0.565238	-0.823068	0.647616	1
ENSMUSG00000018740	Slc25a35	solute carrier family 25, member 35	116.911	166.978	0.701939	-0.510582	0.315223	1
ENSMUSG00000020899	Pfas	phosphoribosylformylglycinamidine synthase (FGAR amidotransferase)	498.573	605.291	0.823983	-0.279314	0.430242	1
ENSMUSG00000020898	Ctc1	CTS telomere maintenance complex component 1	273.593	316.704	0.864304	-0.210389	0.641156	1
ENSMUSG00000020897	Aurkb	aurora kinase B	10.4114	17.8833	0.60431	-0.72664	0.560001	1
ENSMUSG00000064899	Snord118	small nucleolar RNA, C/D box 118	88.4937	90.5299	0.977754	-0.0324573	0.956024	1
ENSMUSG00000020894	Vamp2	vesicle-associated membrane protein 2	735.543	764.104	0.962671	-0.0548852	0.911724	1
ENSMUSG00000020893	Per1	period circadian clock 1	1686.07	2179.3	0.773779	-0.370006	0.377193	1
[truncated: 7,574 more rows]
