# Supplementary material for: Sex differences in transcriptomic profiles in aged kidney cells of renin lineage
Source: Aging (Albany NY). 2018 Apr 18;10(4):606–21. doi: 10.18632/aging.101416 (PMC5940125; doi:10.18632/aging.101416)
Supplement: Supplementary Table S3 [file aging-10-101416-s003.xlsx]

## Sheet: up_aged_male
Table S3 Differentially expressed genes, aged male vs. young male mice CoRL, up in aged/down in young
gene.id	gene.symbol	gene.name	Aged	Young	foldChange	log2FoldChange	pval	padj
ENSMUSG00000088025	Rprl3	ribonuclease P RNA-like 3	1133.86	0.685383	673.352	9.39522	1.01406e-42	2.07101e-38
ENSMUSG00000080811	Gm14513	predicted gene 14513	231.208	8.50181	24.4383	4.61107	9.92472e-21	1.01346e-16
ENSMUSG00000053279	Aldh1a1	aldehyde dehydrogenase family 1, subfamily A1	777.655	122.116	6.32454	2.66096	5.54194e-10	8.08451e-07
ENSMUSG00000085666	Gm9855	predicted pseudogene 9855	73.6594	7.2459	9.05413	3.17858	2.52482e-07	0.000128911
ENSMUSG00000078597	Cyp4a12b	cytochrome P450, family 4, subfamily a, polypeptide 12B	161.413	32.9584	4.7827	2.25782	4.80933e-06	0.00122776
ENSMUSG00000036896	C1qc	complement component 1, q subcomponent, C chain	1220.53	410.597	2.96778	1.56938	5.91422e-06	0.00140969
ENSMUSG00000036905	C1qb	complement component 1, q subcomponent, beta polypeptide	1651.62	588.747	2.80225	1.48659	9.93026e-06	0.00197385
ENSMUSG00000060639	Hist1h4i	histone cluster 1, H4i	117.765	28.2727	4.05718	2.02048	1.45606e-05	0.00255283
ENSMUSG00000032978	Guca2b	guanylate cyclase activator 2b (retina)	894.285	333.458	2.67682	1.42052	2.20815e-05	0.00344252
ENSMUSG00000036887	C1qa	complement component 1, q subcomponent, alpha polypeptide	1165.49	444.605	2.61778	1.38834	3.75792e-05	0.00517451
ENSMUSG00000069515	Lyz1	lysozyme 1	144.047	13.4767	10.0193	3.32472	3.97202e-05	0.00537222
ENSMUSG00000021508	Cxcl14	chemokine (C-X-C motif) ligand 14	37.6394	3.8993	7.88672	2.97943	4.18521e-05	0.00553693
ENSMUSG00000023992	Trem2	triggering receptor expressed on myeloid cells 2	58.4602	9.10688	5.88314	2.55659	5.17507e-05	0.00640548
ENSMUSG00000074254	Cyp2a4	cytochrome P450, family 2, subfamily a, polypeptide 4	3069.95	725.066	4.22957	2.08051	5.61456e-05	0.00682537
ENSMUSG00000075270	Pde11a	phosphodiesterase 11A	47.8465	7.8669	5.50885	2.46175	5.8287e-05	0.00696138
ENSMUSG00000068086	Cyp2d9	cytochrome P450, family 2, subfamily d, polypeptide 9	440.867	165.727	2.65024	1.40613	0.000111832	0.011251
ENSMUSG00000076530	Igkv11-106	immunoglobulin kappa variable 11-106	20.1311	0.331787	15.8667	3.98793	0.000153563	0.0141891
ENSMUSG00000035916	Ptprq	protein tyrosine phosphatase, receptor type, Q	641.96	2.67611	174.902	7.45041	0.000195531	0.0169929
ENSMUSG00000072575	Eddm3b	epididymal protein 3B	44.7524	3.57443	10.0018	3.32218	0.000208839	0.017892
ENSMUSG00000022546	Gpt	glutamic pyruvic transaminase, soluble	241.349	88.258	2.71515	1.44103	0.000210309	0.017892
ENSMUSG00000063816	Gm4987	predicted gene 4987	39.0121	5.68798	5.98268	2.58079	0.000245881	0.0200065
ENSMUSG00000026417	Pigr	polymeric immunoglobulin receptor	3622.01	735.022	4.92241	2.29937	0.000261614	0.0207279
ENSMUSG00000032940	Rbm11	RNA binding motif protein 11	45.6475	8.78306	4.76819	2.25344	0.000286674	0.0225183
ENSMUSG00000074639	BC089597	cDNA sequence BC089597	203.897	78.407	2.58034	1.36756	0.000336889	0.0252952
ENSMUSG00000079457	Gm7609	predicted pseudogene 7609	20.9064	0.663575	13.1682	3.71899	0.000403802	0.0285823
ENSMUSG00000006724	Cyp27b1	cytochrome P450, family 27, subfamily b, polypeptide 1	175.199	29.7268	5.73439	2.51964	0.00052364	0.0339502
ENSMUSG00000024747	Aldh1a7	aldehyde dehydrogenase family 1, subfamily A7	435.224	105.477	4.0969	2.03453	0.000571003	0.0357718
ENSMUSG00000059498	Fcgr3	Fc receptor, IgG, low affinity III	605.563	230.103	2.62464	1.39212	0.000582381	0.036373
ENSMUSG00000074071	Fam169b	family with sequence similarity 169, member B	127.277	47.5988	2.63952	1.40027	0.000688901	0.0415027
ENSMUSG00000040584	Abcb1a	ATP-binding cassette, sub-family B (MDR/TAP), member 1A	286.34	71.2015	3.9797	1.99266	0.000776639	0.0449329
ENSMUSG00000061684	Rpl21-ps8	ribosomal protein L21, pseudogene 8	222.784	86.9092	2.54562	1.34802	0.000839279	0.0476128
ENSMUSG00000031851	Ntpcr	nucleoside-triphosphatase, cancer-related	136.87	50.1166	2.69717	1.43145	0.000917329	0.0504976
ENSMUSG00000035504	Reep6	receptor accessory protein 6	453.848	209.802	2.15771	1.1095	0.000944969	0.0517402
ENSMUSG00000076577	Igkv8-30	immunoglobulin kappa chain variable 8-30	58.5211	0	59.5211	5.89533	0.00104871	0.0556308
ENSMUSG00000027322	Siglec1	sialic acid binding Ig-like lectin 1, sialoadhesin	180.879	71.5792	2.50594	1.32535	0.00115345	0.0590397
ENSMUSG00000044249	Defb29	defensin beta 29	198.689	56.484	3.47382	1.79652	0.00113937	0.0590397
ENSMUSG00000074417	Gm14548	predicted gene 14548	35.6603	6.00887	5.23057	2.38697	0.00120886	0.0612618
ENSMUSG00000033740	St18	suppression of tumorigenicity 18	19.2203	1.32715	8.68886	3.11917	0.00122003	0.0616086
ENSMUSG00000034918	Cdhr2	cadherin-related family member 2	317.91	140.798	2.24904	1.16931	0.0012573	0.0627354
ENSMUSG00000022899	Slc15a2	solute carrier family 15 (H+/peptide transporter), member 2	752.32	202.024	3.71049	1.89161	0.00125944	0.0627354
ENSMUSG00000022304	Dpys	dihydropyrimidinase	274.33	32.9465	8.1107	3.01983	0.00135898	0.0663983
ENSMUSG00000076749	Tcrg-C1	T cell receptor gamma, constant 1	28.2135	0.995362	14.6407	3.87191	0.00148808	0.0701129
ENSMUSG00000055555	4930502E18Rik	RIKEN cDNA 4930502E18 gene	15.7288	0	16.7288	4.06426	0.00150576	0.0705324
ENSMUSG00000001983	Taco1	translational activator of mitochondrially encoded cytochrome c oxidase I	194.622	81.2812	2.37748	1.24943	0.00175968	0.0783987
ENSMUSG00000029273	Sult1d1	sulfotransferase family 1D, member 1	4006.9	2086.7	1.91977	0.940936	0.00178302	0.0788195
ENSMUSG00000091613	Gm17046	predicted gene 17046	94.5031	31.5332	2.93556	1.55364	0.00183566	0.0802778
ENSMUSG00000083596	Rpl21-ps15	ribosomal protein L21, pseudogene 15	136.985	54.2117	2.49921	1.32147	0.00191077	0.0824703
ENSMUSG00000085468	Gm15343	predicted gene 15343	88.9127	29.8783	2.91184	1.54193	0.00209459	0.0873189
ENSMUSG00000076556	Igkv4-57	immunoglobulin kappa variable 4-57	14.374	0.887422	8.14551	3.02601	0.0021056	0.0873519
ENSMUSG00000058064	Gm10036	predicted gene 10036	622.242	293.331	2.11748	1.08235	0.00215474	0.0889014
ENSMUSG00000030769	Slc5a11	solute carrier family 5 (sodium/glucose cotransporter), member 11	327.421	156.842	2.08069	1.05706	0.00219858	0.0905273
ENSMUSG00000083798	Gm14584	predicted gene 14584	309.442	144.801	2.12921	1.09032	0.00244394	0.0978651
ENSMUSG00000091813	Ces2h	carboxylesterase 2H	49.2529	14.4721	3.24796	1.69953	0.0026682	0.104392
ENSMUSG00000027870	Hao2	hydroxyacid oxidase 2	2642.88	639.514	4.12775	2.04536	0.00293149	0.110369
ENSMUSG00000006395	Hyi	hydroxypyruvate isomerase (putative)	276.007	124.775	2.2024	1.13908	0.00316308	0.114402
ENSMUSG00000051124	Gimap9	GTPase, IMAP family member 9	257.186	117.272	2.18298	1.1263	0.00317053	0.114402
ENSMUSG00000086513	9130208D14Rik	RIKEN cDNA 9130208D14 gene	67.5508	9.4329	6.57064	2.71603	0.00337948	0.119403
ENSMUSG00000048701	Ccdc6	coiled-coil domain containing 6	2915.06	1257.01	2.318	1.21288	0.00343399	0.120502
ENSMUSG00000009646	Pla2g12b	phospholipase A2, group XIIB	23.8335	1.5728	9.65231	3.27087	0.00345317	0.120846
ENSMUSG00000026656	Fcgr2b	Fc receptor, IgG, low affinity IIb	909.643	455.776	1.99363	0.995399	0.00359376	0.124339
ENSMUSG00000038598	AI481877	expressed sequence AI481877	10.1579	0	11.1579	3.47999	0.00369719	0.126267
ENSMUSG00000026649	Cfap126	cilia and flagella associated protein 126	42.6723	12.098	3.33426	1.73737	0.0040347	0.135305
ENSMUSG00000040055	Gjb6	gap junction protein, beta 6	40.6001	10.9471	3.48201	1.79992	0.00430621	0.141619
ENSMUSG00000021418	Rpp40	ribonuclease P 40 subunit	97.6617	38.6167	2.49041	1.31638	0.00438239	0.142974
ENSMUSG00000058022	Adtrp	androgen dependent TFPI regulating protein	311.231	161.376	1.92289	0.943276	0.00440149	0.14314
ENSMUSG00000074768	Bhmt	betaine-homocysteine methyltransferase	38.8383	10.6876	3.40858	1.76917	0.00443179	0.143818
ENSMUSG00000069516	Lyz2	lysozyme 2	3694.57	1908.91	1.93495	0.952296	0.0047271	0.150376
ENSMUSG00000040413	Timd2	T cell immunoglobulin and mucin domain containing 2	559.553	198.256	2.81323	1.49223	0.00474934	0.150849
ENSMUSG00000015852	Fcrls	Fc receptor-like S, scavenger receptor	47.7081	13.3351	3.39783	1.76461	0.00483206	0.152292
ENSMUSG00000040522	Tlr8	toll-like receptor 8	85.647	31.5052	2.66563	1.41448	0.00502754	0.15652
ENSMUSG00000034714	Ttyh2	tweety family member 2	678.753	344.999	1.96461	0.974244	0.00527187	0.161179
ENSMUSG00000029804	Herc3	hect domain and RLD 3	807.329	384.617	2.0962	1.06777	0.00529522	0.161513
ENSMUSG00000000627	Sema4f	sema domain, immunoglobulin domain (Ig), TM domain, and short cytoplasmic domain	13.1295	0.663575	8.49343	3.08635	0.00543943	0.163608
ENSMUSG00000042102	Dmgdh	dimethylglycine dehydrogenase precursor	687.926	270.016	2.54201	1.34597	0.00564862	0.167921
ENSMUSG00000025592	Dach2	dachshund 2 (Drosophila)	13.1462	0	14.1462	3.82234	0.00582235	0.171093
ENSMUSG00000062611	Rps3a2	ribosomal protein S3A2	367.171	186.612	1.96241	0.972623	0.00608328	0.175345
ENSMUSG00000035699	Slc51a	solute carrier family 51, alpha subunit	461.414	236.42	1.94766	0.961743	0.00625619	0.178372
ENSMUSG00000055900	Tmem69	transmembrane protein 69	109.371	47.1058	2.29435	1.19808	0.0063522	0.179683
ENSMUSG00000035078	Mtmr9	myotubularin related protein 9	510.167	272.322	1.8702	0.903194	0.00664752	0.185468
ENSMUSG00000006585	Cdt1	chromatin licensing and DNA replication factor 1	108.427	49.7054	2.15809	1.10976	0.00668116	0.186152
ENSMUSG00000028081	Rps3a1	ribosomal protein S3A1	288.798	143.245	2.00907	1.00653	0.00676521	0.187217
ENSMUSG00000039246	Lyplal1	lysophospholipase-like 1	238.749	96.5942	2.45659	1.29666	0.00689886	0.188975
ENSMUSG00000031933	Izumo1r	IZUMO1 receptor, JUNO	16.8218	0.443711	12.3444	3.62579	0.00701376	0.190989
ENSMUSG00000093483	AA465934	expressed sequence AA465934	22.8032	3.33968	5.48501	2.45549	0.00710057	0.192933
ENSMUSG00000047898	Ccr4	chemokine (C-C motif) receptor 4	24.2178	0.663575	15.1588	3.92209	0.0071392	0.193374
ENSMUSG00000020865	Abcc3	ATP-binding cassette, sub-family C (CFTR/MRP), member 3	198.67	88.8005	2.22349	1.15282	0.00751751	0.198953
ENSMUSG00000020709	Adap2	ArfGAP with dual PH domains 2	1066.56	594.582	1.79247	0.841948	0.0079656	0.208033
ENSMUSG00000038147	Cd84	CD84 antigen	448.273	100.912	4.40844	2.14027	0.00832305	0.214623
ENSMUSG00000050164	Mchr1	melanin-concentrating hormone receptor 1	15.6242	2.01652	5.51107	2.46233	0.0084198	0.215978
ENSMUSG00000023122	Sult1c2	sulfotransferase family, cytosolic, 1C, member 2	1444.57	466.735	3.09057	1.62787	0.0084155	0.215978
ENSMUSG00000038641	Akr1d1	aldo-keto reductase family 1, member D1	227.759	66.8756	3.37028	1.75287	0.00842848	0.215978
ENSMUSG00000055137	Sugct	succinyl-CoA glutarate-CoA transferase	642.942	288.236	2.22636	1.15469	0.00853126	0.21752
ENSMUSG00000021707	Dhfr	dihydrofolate reductase	684.437	347.236	1.96831	0.97696	0.00878139	0.221908
ENSMUSG00000024059	Clip4	CAP-GLY domain containing linker protein family, member 4	216.999	90.9184	2.37166	1.2459	0.00882838	0.222337
ENSMUSG00000027965	Olfm3	olfactomedin 3	145.031	71.0917	2.02563	1.01837	0.00886218	0.222724
ENSMUSG00000030545	Pex11a	peroxisomal biogenesis factor 11 alpha	397.458	198.792	1.99437	0.995933	0.00919761	0.228798
ENSMUSG00000042073	Abhd14b	abhydrolase domain containing 14b	1770.71	1027.57	1.7225	0.784505	0.0092755	0.229189
ENSMUSG00000049971	Glt1d1	glycosyltransferase 1 domain containing 1	100.918	46.057	2.16584	1.11493	0.00946636	0.23293
ENSMUSG00000073418	C4b	complement component 4B (Chido blood group)	319.696	63.9161	4.94016	2.30456	0.00953101	0.234238
ENSMUSG00000026730	Pter	phosphotriesterase related	3236.89	1272.01	2.54349	1.34681	0.00976968	0.237249
ENSMUSG00000091957	Rps2-ps10	ribosomal protein S2, pseudogene 10	104.965	45.6656	2.27073	1.18315	0.00984201	0.238552
ENSMUSG00000002985	Apoe	apolipoprotein E	8403.22	4691.17	1.79112	0.840858	0.0101662	0.244263
ENSMUSG00000021213	Akr1c13	aldo-keto reductase family 1, member C13	56.9771	21.5843	2.56715	1.36016	0.010246	0.244633
ENSMUSG00000031844	Hsd17b2	hydroxysteroid (17-beta) dehydrogenase 2	54.2831	19.8364	2.6532	1.40773	0.0101992	0.244633
ENSMUSG00000057228	Aadat	aminoadipate aminotransferase	1042.79	471.225	2.21038	1.14429	0.0103211	0.244817
ENSMUSG00000082543	Gm14336	predicted gene 14336	66.1667	25.1845	2.56513	1.35903	0.0103475	0.244875
ENSMUSG00000030737	Slco2b1	solute carrier organic anion transporter family, member 2b1	610.768	258.986	2.35308	1.23455	0.0103371	0.244875
ENSMUSG00000076757	Tcrg-C4	T cell receptor gamma, constant 4	22.0285	0.331787	17.2914	4.11198	0.0106041	0.248927
ENSMUSG00000000869	Il4	interleukin 4	14.9092	0.663575	9.56329	3.25751	0.0106517	0.248944
ENSMUSG00000028755	Cda	cytidine deaminase	818.002	370.845	2.20254	1.13917	0.0106721	0.248944
ENSMUSG00000031827	Cotl1	coactosin-like 1 (Dictyostelium)	1842.85	1088.63	1.69218	0.758885	0.0106901	0.248944
ENSMUSG00000022022	Mtrf1	mitochondrial translational release factor 1	128.024	59.3996	2.13617	1.09503	0.0112201	0.254326
ENSMUSG00000025197	Cyp2c44	cytochrome P450, family 2, subfamily c, polypeptide 44	293.139	76.3309	3.80364	1.92738	0.0112994	0.255839
ENSMUSG00000033634	Nat8f2	N-acetyltransferase 8 (GCN5-related) family member 2	638.201	257.329	2.47437	1.30706	0.0116437	0.261893
ENSMUSG00000046532	Ar	androgen receptor	1473.33	732.308	2.01053	1.00757	0.0118371	0.265076
ENSMUSG00000039710	Slc7a12	solute carrier family 7 (cationic amino acid transporter, y+ system), member 12	19.0697	3.32584	4.63949	2.21397	0.0119692	0.266128
ENSMUSG00000049950	Rpp38	ribonuclease P/MRP 38 subunit	58.5395	21.2456	2.67646	1.42033	0.011995	0.266276
ENSMUSG00000028443	Nudt2	nudix (nucleoside diphosphate linked moiety X)-type motif 2	123.054	59.361	2.05521	1.03928	0.0120712	0.267096
ENSMUSG00000020839	Tmigd1	transmembrane and immunoglobulin domain containing 1	899.28	441.931	2.03255	1.02329	0.0125981	0.276656
ENSMUSG00000013089	Etv5	ets variant 5	347.881	188.438	1.84166	0.881007	0.0129026	0.281829
ENSMUSG00000025321	Itgb8	integrin beta 8	2428	1372.34	1.76868	0.82267	0.0130634	0.283826
ENSMUSG00000015536	Mocs2	molybdenum cofactor synthesis 2	563.443	317.68	1.77119	0.824719	0.0130441	0.283826
ENSMUSG00000021238	Aldh6a1	aldehyde dehydrogenase family 6, subfamily A1	6334.82	3699.15	1.71231	0.775947	0.0135404	0.288962
ENSMUSG00000020777	Acox1	acyl-Coenzyme A oxidase 1, palmitoyl	10898.4	6190.06	1.76051	0.815995	0.0135734	0.289097
ENSMUSG00000079261	Gm15217	predicted gene 15217	96.2096	37.8917	2.4995	1.32164	0.0137911	0.289471
ENSMUSG00000021876	Rnase4	ribonuclease, RNase A family 4	179.403	90.5137	1.97132	0.979162	0.013784	0.289471
ENSMUSG00000037053	Azgp1	alpha-2-glycoprotein 1, zinc	1017.02	344.392	2.94743	1.55946	0.0139981	0.291717
ENSMUSG00000025871	4833439L19Rik	RIKEN cDNA 4833439L19 gene	6696.55	3745.15	1.78785	0.838226	0.0141915	0.294547
ENSMUSG00000028088	Fmo5	flavin containing monooxygenase 5	976.452	576.076	1.6938	0.760264	0.0142631	0.295431
ENSMUSG00000026726	Cubn	cubilin (intrinsic factor-cobalamin receptor)	9992.59	4209.18	2.37368	1.24712	0.0143637	0.296612
ENSMUSG00000085444	Gm13936	predicted gene 13936	37.1645	9.49025	3.63809	1.86318	0.0143623	0.296612
ENSMUSG00000025894	Aasdhppt	aminoadipate-semialdehyde dehydrogenase-phosphopantetheinyl transferase	200.483	106.162	1.88018	0.910868	0.0145821	0.299515
ENSMUSG00000029776	Hibadh	3-hydroxyisobutyrate dehydrogenase	1632.29	986.013	1.65478	0.726642	0.0149604	0.304926
ENSMUSG00000085307	Gm11525	predicted gene 11525	14.6763	1.10729	7.43908	2.89512	0.0150678	0.305598
ENSMUSG00000023031	Cela1	chymotrypsin-like elastase family, member 1	360.341	144.577	2.48212	1.31157	0.0153633	0.309128
ENSMUSG00000019762	Iyd	iodotyrosine deiodinase	699.692	392.956	1.77861	0.830748	0.0154161	0.309275
ENSMUSG00000021207	Akr1c21	aldo-keto reductase family 1, member C21	7915.52	3171.43	2.49541	1.31928	0.0154917	0.309576
ENSMUSG00000020733	Slc9a3r1	solute carrier family 9 (sodium/hydrogen exchanger), member 3 regulator 1	3345.01	1862.62	1.79543	0.844332	0.015523	0.309898
ENSMUSG00000026589	Sec16b	SEC16 homolog B (S. cerevisiae)	62.7711	26.068	2.35596	1.23631	0.015759	0.311978
ENSMUSG00000051439	Cd14	CD14 antigen	926.986	387.629	2.38785	1.25571	0.0157883	0.311978
ENSMUSG00000028644	Ermap	erythroblast membrane-associated protein	27.2567	7.39452	3.36609	1.75107	0.0160028	0.314206
ENSMUSG00000058443	Rpl10-ps3	ribosomal protein L10, pseudogene 3	398.568	229.787	1.73133	0.791877	0.0160824	0.314909
ENSMUSG00000021136	Smoc1	SPARC related modular calcium binding 1	66.8177	25.5479	2.55454	1.35306	0.0168537	0.323804
ENSMUSG00000023045	Soat2	sterol O-acyltransferase 2	21.0679	4.51239	4.00332	2.0012	0.0169781	0.324816
ENSMUSG00000028013	Ppa2	pyrophosphatase (inorganic) 2	2095	1194.57	1.75314	0.80994	0.0171198	0.326765
ENSMUSG00000090124	Ugt1a7c	UDP glucuronosyltransferase 1 family, polypeptide A7C	1439.69	824.381	1.74549	0.803632	0.0173013	0.328998
ENSMUSG00000058715	Fcer1g	Fc receptor, IgE, high affinity I, gamma polypeptide	401.138	189.158	2.11476	1.08049	0.0173398	0.329345
ENSMUSG00000016526	Dyrk3	dual-specificity tyrosine-(Y)-phosphorylation regulated kinase 3	27.2421	7.09146	3.49035	1.80337	0.0176215	0.332918
ENSMUSG00000039886	Tmem120a	transmembrane protein 120A	513.832	307.878	1.66678	0.737066	0.0176893	0.333581
ENSMUSG00000042262	Ccr8	chemokine (C-C motif) receptor 8	36.2478	3.10199	9.08041	3.18276	0.0177505	0.334427
ENSMUSG00000026385	Dbi	diazepam binding inhibitor	3877.52	2104.05	1.84248	0.881651	0.0177967	0.334988
ENSMUSG00000028672	Hmgcl	3-hydroxy-3-methylglutaryl-Coenzyme A lyase	979.56	566.897	1.72665	0.787976	0.0179443	0.336884
ENSMUSG00000030004	Nat8	N-acetyltransferase 8 (GCN5-related)	789.248	340.941	2.31107	1.20856	0.0179902	0.337077
ENSMUSG00000026692	Fmo4	flavin containing monooxygenase 4	276.202	96.6718	2.83809	1.50492	0.0181833	0.339322
ENSMUSG00000035352	Ccl12	chemokine (C-C motif) ligand 12	69.8004	31.5212	2.17706	1.12238	0.0181636	0.339322
ENSMUSG00000028964	Park7	Parkinson disease (autosomal recessive, early onset) 7	2214.16	1352.46	1.63666	0.710758	0.0182728	0.339709
ENSMUSG00000028167	Bdh2	3-hydroxybutyrate dehydrogenase, type 2	1361.39	574.853	2.36586	1.24237	0.0183329	0.340067
ENSMUSG00000054474	Thnsl2	threonine synthase-like 2 (bacterial)	1303.67	620.306	2.09989	1.07031	0.0183762	0.340147
ENSMUSG00000074064	Mlycd	malonyl-CoA decarboxylase	489.308	284.475	1.71752	0.780323	0.0183645	0.340147
ENSMUSG00000019987	Arg1	arginase, liver	26.5566	7.13796	3.38618	1.75966	0.0188695	0.346246
ENSMUSG00000025950	Idh1	isocitrate dehydrogenase 1 (NADP+), soluble	5799.4	2887.23	2.00829	1.00597	0.0191393	0.349626
ENSMUSG00000090486	BC035947	cDNA sequence BC035947	508.813	190.268	2.66544	1.41437	0.0195003	0.35495
ENSMUSG00000059456	Ptk2b	PTK2 protein tyrosine kinase 2 beta	1698.85	1042.44	1.62908	0.704059	0.019524	0.355066
ENSMUSG00000066071	Cyp4a12a	cytochrome P450, family 4, subfamily a, polypeptide 12a	1619.09	936.597	1.72792	0.789037	0.019574	0.355658
ENSMUSG00000053332	Gas5	growth arrest specific 5	559.889	316.23	1.76808	0.822183	0.0197718	0.357979
ENSMUSG00000041440	Gk5	glycerol kinase 5 (putative)	277.401	120.704	2.28751	1.19378	0.0198133	0.358412
ENSMUSG00000048782	Insc	inscuteable homolog (Drosophila)	35.5788	12.7983	2.65096	1.40652	0.0198543	0.358518
ENSMUSG00000025479	Cyp2e1	cytochrome P450, family 2, subfamily e, polypeptide 1	6821.37	4176.29	1.63321	0.707706	0.019925	0.359159
ENSMUSG00000037361	Sf3b6	splicing factor 3B, subunit 6	544.382	324.947	1.67322	0.74263	0.0200299	0.360054
ENSMUSG00000020609	Apob	apolipoprotein B	4421.96	2704.94	1.63454	0.708881	0.0200451	0.360054
ENSMUSG00000028683	Eif2b3	eukaryotic translation initiation factor 2B, subunit 3	155.483	84.7724	1.8244	0.867423	0.0200084	0.360054
ENSMUSG00000000876	Pxmp4	peroxisomal membrane protein 4	655.261	348.922	1.87545	0.907236	0.020286	0.363103
ENSMUSG00000034795	Ccdc122	coiled-coil domain containing 122	72.6924	32.0343	2.23079	1.15755	0.0206261	0.367901
ENSMUSG00000024679	Ms4a6d	membrane-spanning 4-domains, subfamily A, member 6D	64.057	27.4457	2.28706	1.1935	0.0207491	0.369642
ENSMUSG00000023832	Acat2	acetyl-Coenzyme A acetyltransferase 2	229.857	121.943	1.87775	0.909004	0.0208488	0.369764
ENSMUSG00000024672	Ms4a7	membrane-spanning 4-domains, subfamily A, member 7	239.397	96.456	2.46672	1.30259	0.0209086	0.36986
ENSMUSG00000083773	Gm13394	predicted gene 13394	1211.88	677.494	1.78761	0.838029	0.0210069	0.36986
ENSMUSG00000028138	Adh5	alcohol dehydrogenase 5 (class III), chi polypeptide	1116.54	676.74	1.64892	0.721518	0.0209529	0.36986
ENSMUSG00000010048	Ifrd2	interferon-related developmental regulator 2	384.388	208.711	1.83771	0.87791	0.0209588	0.36986
ENSMUSG00000026712	Mrc1	mannose receptor, C type 1	1285.95	548.678	2.34129	1.2273	0.0210467	0.36991
ENSMUSG00000081752	Gm14680	predicted gene 14680	271.417	160.326	1.68861	0.75584	0.0210745	0.370082
ENSMUSG00000004032	Gstm5	glutathione S-transferase, mu 5	800.124	379.855	2.10349	1.07278	0.021179	0.37122
ENSMUSG00000028194	Ddah1	dimethylarginine dimethylaminohydrolase 1	3119.96	1596.26	1.95395	0.966392	0.021213	0.37122
ENSMUSG00000028528	Dnajc6	DnaJ heat shock protein family (Hsp40) member C6	338.504	183.195	1.84318	0.882194	0.0212843	0.371847
ENSMUSG00000084068	Gm11573	predicted gene 11573	7.90759	0	8.90759	3.15504	0.0213138	0.371986
ENSMUSG00000032554	Trf	transferrin	92.0626	41.8146	2.17362	1.1201	0.0213287	0.371986
ENSMUSG00000037594	BC022687	cDNA sequence BC022687	203.919	91.1462	2.22385	1.15306	0.021484	0.373419
ENSMUSG00000047905	Gm8566	predicted pseudogene 8566	1389.11	808.511	1.71722	0.780072	0.0214448	0.373419
ENSMUSG00000028199	Cryz	crystallin, zeta	1767.64	930.252	1.89921	0.925397	0.0217295	0.375768
ENSMUSG00000064109	Hcst	hematopoietic cell signal transducer	34.4146	5.99796	5.0607	2.33934	0.0217632	0.376033
ENSMUSG00000090150	Acad11	acyl-Coenzyme A dehydrogenase family, member 11	1878.62	1081.04	1.7371	0.796684	0.0217981	0.376317
ENSMUSG00000001348	Acp5	acid phosphatase 5, tartrate resistant	248.191	138.522	1.78604	0.836761	0.0218428	0.376771
ENSMUSG00000031132	Cd40lg	CD40 ligand	248.581	17.7285	13.3263	3.7362	0.0219068	0.377236
ENSMUSG00000020100	Slc29a3	solute carrier family 29 (nucleoside transporters), member 3	1157.34	715.02	1.61775	0.693985	0.0221404	0.380617
ENSMUSG00000078435	AU041133	expressed sequence AU041133	39.7907	15.1822	2.52071	1.33383	0.0222867	0.381527
ENSMUSG00000037366	Pafah2	platelet-activating factor acetylhydrolase 2	715.325	437.122	1.63499	0.709282	0.022242	0.381527
ENSMUSG00000035944	Ttc38	tetratricopeptide repeat domain 38	471.33	279.233	1.68549	0.753164	0.0224914	0.384386
ENSMUSG00000032590	Apeh	acylpeptide hydrolase	1406.52	881.062	1.59571	0.674201	0.022577	0.385527
ENSMUSG00000022244	Amacr	alpha-methylacyl-CoA racemase	1702.38	1043.79	1.63036	0.705194	0.0226556	0.385901
ENSMUSG00000081434	Gm14165	predicted gene 14165	247.476	137.223	1.79764	0.846105	0.0227529	0.386913
ENSMUSG00000045410	Akr1e1	aldo-keto reductase family 1, member E1	300.562	147.112	2.03604	1.02577	0.0227782	0.387021
ENSMUSG00000037762	Slc16a9	solute carrier family 16 (monocarboxylic acid transporters), member 9	603.754	314.136	1.91903	0.940374	0.0228331	0.387305
ENSMUSG00000055114	Anxa13	annexin A13	216.734	86.4445	2.48997	1.31613	0.0228708	0.387305
ENSMUSG00000074170	Plekhf1	pleckstrin homology domain containing, family F (with FYVE domain) member 1	145.454	53.4654	2.68893	1.42703	0.0230961	0.389506
ENSMUSG00000039682	Lap3	leucine aminopeptidase 3	2659.74	1416.96	1.87646	0.908014	0.0233559	0.392267
ENSMUSG00000021376	Tpmt	thiopurine methyltransferase	718.488	297.521	2.41017	1.26914	0.0234417	0.39274
ENSMUSG00000016552	Foxred2	FAD-dependent oxidoreductase domain containing 2	206.617	106.356	1.93392	0.951528	0.0234963	0.392842
ENSMUSG00000034285	Nipsnap1	nipsnap homolog 1 (C. elegans)	906.932	462.414	1.95922	0.970283	0.0236088	0.393602
ENSMUSG00000021996	Esd	esterase D/formylglutathione hydrolase	1904.72	1101.16	1.72909	0.790009	0.0236047	0.393602
ENSMUSG00000066072	Cyp4a10	cytochrome P450, family 4, subfamily a, polypeptide 10	718.304	364.783	1.96648	0.975614	0.0237777	0.395135
ENSMUSG00000086868	Gm15883	predicted gene 15883	90.533	43.4975	2.05704	1.04057	0.0238475	0.395323
ENSMUSG00000049152	Ugt3a2	UDP glycosyltransferases 3 family, polypeptide A2	4197.84	2470.7	1.69877	0.764489	0.0239751	0.395957
ENSMUSG00000029919	Hpgds	hematopoietic prostaglandin D synthase	227.53	104.104	2.17432	1.12056	0.0240249	0.395957
ENSMUSG00000063856	Gpx1	glutathione peroxidase 1	9750.55	5273.69	1.84874	0.886546	0.024121	0.396957
ENSMUSG00000012889	Podnl1	podocan-like 1	163.717	17.4829	8.91187	3.15573	0.0241905	0.397686
ENSMUSG00000026189	Pecr	peroxisomal trans-2-enoyl-CoA reductase	2831.94	1425.74	1.98561	0.989581	0.0242313	0.397811
ENSMUSG00000027762	Sucnr1	succinate receptor 1	204.618	92.1749	2.2068	1.14195	0.0242515	0.397821
ENSMUSG00000027187	Cat	catalase	9581.21	4987.52	1.92085	0.941747	0.024391	0.399469
ENSMUSG00000013997	Nit1	nitrilase 1	1036.01	618.238	1.67465	0.743861	0.0245003	0.400797
ENSMUSG00000025934	Gsta3	glutathione S-transferase, alpha 3	692.241	310.986	2.22202	1.15187	0.0246264	0.401334
ENSMUSG00000028179	Cth	cystathionase (cystathionine gamma-lyase)	1324.4	679.076	1.9489	0.962662	0.0246378	0.401334
ENSMUSG00000040339	Fam102b	family with sequence similarity 102, member B	782.735	399.686	1.95598	0.967894	0.0247156	0.401711
ENSMUSG00000025102	3110040N11Rik	RIKEN cDNA 3110040N11 gene	113.401	55.2322	2.03443	1.02462	0.0247074	0.401711
ENSMUSG00000031445	Proz	protein Z, vitamin K-dependent plasma glycoprotein	117.129	54.0228	2.14691	1.10226	0.0247967	0.401711
ENSMUSG00000083022	Rps15a-ps6	ribosomal protein S15A, pseudogene 6	266.977	158.4	1.68117	0.749463	0.0256694	0.407656
ENSMUSG00000028223	Decr1	2,4-dienoyl CoA reductase 1, mitochondrial	1412.08	828.962	1.70259	0.76773	0.0256399	0.407656
ENSMUSG00000029816	Gpnmb	glycoprotein (transmembrane) nmb	60.3299	15.1823	3.78994	1.92218	0.0255941	0.407656
ENSMUSG00000032076	Cadm1	cell adhesion molecule 1	514.454	297.227	1.7284	0.789434	0.025622	0.407656
ENSMUSG00000032265	Fam46a	family with sequence similarity 46, member A	613.757	369.202	1.6606	0.731703	0.0254635	0.407656
ENSMUSG00000024663	Rab3il1	RAB3A interacting protein (rabin3)-like 1	517.402	323.383	1.59812	0.676372	0.0258823	0.408812
ENSMUSG00000038642	Ctss	cathepsin S	2353.01	1300.25	1.80904	0.855221	0.0262073	0.410884
ENSMUSG00000030498	Gas2	growth arrest specific 2	2165.45	1042.59	2.07595	1.05377	0.0261475	0.410884
ENSMUSG00000023092	Fhl1	four and a half LIM domains 1	1395.44	754.648	1.848	0.885963	0.0262446	0.411038
ENSMUSG00000062054	Iah1	isoamyl acetate-hydrolyzing esterase 1 homolog	570.428	307.248	1.85379	0.89048	0.0263675	0.411985
ENSMUSG00000075268	Gm10819	predicted gene 10819	335.148	196.852	1.69899	0.764677	0.0267899	0.415753
ENSMUSG00000013415	Igf2bp1	insulin-like growth factor 2 mRNA binding protein 1	187.424	34.0202	5.38043	2.42772	0.0269402	0.41745
ENSMUSG00000006342	Susd2	sushi domain containing 2	2488.72	1341.96	1.8539	0.890564	0.02714	0.418153
ENSMUSG00000031201	Brcc3	BRCA1/BRCA2-containing complex, subunit 3	511.959	306.18	1.6699	0.739758	0.0276207	0.421913
ENSMUSG00000026117	Zap70	zeta-chain (TCR) associated protein kinase	198.044	16.3251	11.4888	3.52216	0.0279682	0.425521
ENSMUSG00000030244	Gys2	glycogen synthase 2	208.548	79.4074	2.60608	1.38188	0.0279714	0.425521
ENSMUSG00000032238	Rora	RAR-related orphan receptor alpha	1516.09	957.567	1.58266	0.662352	0.0280398	0.426084
ENSMUSG00000041453	Rpl21	ribosomal protein L21	282.083	156.339	1.79919	0.847347	0.0282503	0.427691
ENSMUSG00000016756	Cmah	cytidine monophospho-N-acetylneuraminic acid hydroxylase	735.119	450.975	1.62867	0.703696	0.0282804	0.427831
ENSMUSG00000002076	Hsf2bp	heat shock transcription factor 2 binding protein	37.819	9.69234	3.63054	1.86018	0.0284121	0.429187
ENSMUSG00000049799	Lrrc19	leucine rich repeat containing 19	1081.95	685.428	1.57766	0.657784	0.0285522	0.430984
ENSMUSG00000076469	Trbv13-2	T cell receptor beta, variable 13-2	15.7709	0.443711	11.6165	3.5381	0.0288854	0.434521
ENSMUSG00000046058	Eid2	EP300 interacting inhibitor of differentiation 2	118.948	64.1599	1.84082	0.880351	0.028946	0.434645
ENSMUSG00000028970	Abcb1b	ATP-binding cassette, sub-family B (MDR/TAP), member 1B	259.786	150.227	1.72447	0.786151	0.0289883	0.434676
ENSMUSG00000081643	Gm11605	predicted gene 11605	323.599	192.262	1.67958	0.748102	0.0291609	0.434921
ENSMUSG00000005547	Cyp2a5	cytochrome P450, family 2, subfamily a, polypeptide 5	1230.38	584.634	2.10265	1.07221	0.0291902	0.434921
ENSMUSG00000031958	Ldhd	lactate dehydrogenase D	6071.62	3051.99	1.98907	0.992097	0.0291766	0.434921
ENSMUSG00000072949	Acot1	acyl-CoA thioesterase 1	264.038	161.868	1.62731	0.702492	0.0294119	0.43634
ENSMUSG00000022215	Fitm1	fat storage-inducing transmembrane protein 1	34.4146	11.4236	2.8506	1.51127	0.0293906	0.43634
ENSMUSG00000029121	Crmp1	collapsin response mediator protein 1	31.5018	6.16441	4.53656	2.1816	0.0295052	0.43634
ENSMUSG00000033427	Upb1	ureidopropionase, beta	991.722	504.27	1.96474	0.974335	0.0296205	0.437095
ENSMUSG00000032607	Amt	aminomethyltransferase	460.951	277.129	1.66092	0.731983	0.0296091	0.437095
ENSMUSG00000035704	Alg8	asparagine-linked glycosylation 8 (alpha-1,3-glucosyltransferase)	47.0354	18.9191	2.41152	1.26994	0.0296719	0.437221
ENSMUSG00000024790	Sac3d1	SAC3 domain containing 1	64.4746	29.0155	2.18136	1.12523	0.029934	0.439815
ENSMUSG00000076916	Traj13	T cell receptor alpha joining 13	6.16329	0	7.16329	2.84062	0.0300442	0.440167
ENSMUSG00000018102	Hist1h2bc	histone cluster 1, H2bc	1724.99	1091.03	1.58052	0.660403	0.030106	0.440756
ENSMUSG00000024899	Papss2	3'-phosphoadenosine 5'-phosphosulfate synthase 2	2544.02	1131.53	2.24719	1.16813	0.0301428	0.440907
ENSMUSG00000039783	Kmo	kynurenine 3-monooxygenase (kynurenine 3-hydroxylase)	1132.34	524.026	2.15864	1.11012	0.0302305	0.441047
ENSMUSG00000051111	Sv2c	synaptic vesicle glycoprotein 2c	9.7327	0.887422	5.68643	2.50752	0.0302291	0.441047
ENSMUSG00000032093	Cd3e	CD3 antigen, epsilon polypeptide	274.708	26.6166	9.98343	3.31954	0.0302556	0.441047
ENSMUSG00000058076	Sdhc	succinate dehydrogenase complex, subunit C, integral membrane protein	1448.63	902.142	1.60509	0.682658	0.0303398	0.441647
ENSMUSG00000022877	Hrg	histidine-rich glycoprotein	65.3398	24.0584	2.64741	1.40458	0.0305693	0.443072
ENSMUSG00000015668	Pdzd11	PDZ domain containing 11	167.056	96.7347	1.71951	0.781996	0.030594	0.443072
ENSMUSG00000060703	Cd302	CD302 antigen	255.437	143.869	1.77013	0.823858	0.0308351	0.445679
ENSMUSG00000044986	Tst	thiosulfate sulfurtransferase, mitochondrial	263.878	126.359	2.07978	1.05643	0.0310613	0.447998
ENSMUSG00000033735	Spr	sepiapterin reductase	822.077	469.741	1.74847	0.806095	0.0310606	0.447998
ENSMUSG00000040552	C3ar1	complement component 3a receptor 1	549.862	202.826	2.70261	1.43435	0.0311256	0.448335
ENSMUSG00000022613	Miox	myo-inositol oxygenase	13796.4	5410.28	2.54975	1.35035	0.0311937	0.448357
ENSMUSG00000004730	Adgre1	adhesion G protein-coupled receptor E1	568.888	284.598	1.99542	0.996689	0.0312386	0.448648
ENSMUSG00000046603	Tcaim	T cell activation inhibitor, mitochondrial	542.566	252.809	2.14163	1.09871	0.0312654	0.448648
ENSMUSG00000025940	Tmem70	transmembrane protein 70	486.523	304.605	1.59527	0.673801	0.0316688	0.450398
ENSMUSG00000028132	Tmem56	transmembrane protein 56	277.029	163.436	1.6908	0.757708	0.0318028	0.451361
ENSMUSG00000070873	Lilra5	leukocyte immunoglobulin-like receptor, subfamily A (with TM domain), member 5	294.497	126.857	2.31115	1.20861	0.0319387	0.452975
ENSMUSG00000021322	Aoah	acyloxyacyl hydrolase	466.29	278.716	1.67059	0.740356	0.0320648	0.453666
ENSMUSG00000029772	Ahcyl2	S-adenosylhomocysteine hydrolase-like 2	4286.32	2788.91	1.53673	0.61986	0.032038	0.453666
ENSMUSG00000028607	Cpt2	carnitine palmitoyltransferase 2	1118.58	705.215	1.58532	0.664775	0.0326232	0.460763
ENSMUSG00000028792	Ak2	adenylate kinase 2	948.658	589.786	1.60745	0.684772	0.0326489	0.460808
ENSMUSG00000020623	Map2k6	mitogen-activated protein kinase kinase 6	253.986	134.38	1.88348	0.913404	0.0328166	0.462535
ENSMUSG00000066407	Gm10263	predicted gene 10263	57.7771	26.371	2.14742	1.1026	0.0328818	0.462815
ENSMUSG00000025041	Nt5c2	5'-nucleotidase, cytosolic II	1330.87	807.487	1.64737	0.720161	0.0331443	0.463647
ENSMUSG00000026866	Kynu	kynureninase (L-kynurenine hydrolase)	105.048	30.706	3.34474	1.74189	0.033236	0.463647
ENSMUSG00000028527	Ak4	adenylate kinase 4	1839.47	620.156	2.96297	1.56704	0.0332066	0.463647
ENSMUSG00000016503	Gtf3a	general transcription factor III A	150.47	81.8893	1.82738	0.869779	0.0332203	0.463647
ENSMUSG00000091983	Olfr457	olfactory receptor 457	6.5055	0	7.5055	2.90795	0.033147	0.463647
ENSMUSG00000069456	Rdh16	retinol dehydrogenase 16	737.537	440.987	1.67095	0.740666	0.0334431	0.465265
ENSMUSG00000001155	Ftcd	formiminotransferase cyclodeaminase	259.675	52.6107	4.86237	2.28166	0.0335723	0.465476
ENSMUSG00000076745	Tcrg-V4	T cell receptor gamma, variable 4	8.27305	0	9.27305	3.21304	0.033515	0.465476
ENSMUSG00000076490	Trbc1	T cell receptor beta, constant region 1	81.9689	9.08213	8.2293	3.04077	0.0336212	0.465839
ENSMUSG00000035472	Slc25a21	solute carrier family 25 (mitochondrial oxodicarboxylate carrier), member 21	239.298	103.968	2.28924	1.19487	0.0337612	0.465881
ENSMUSG00000086564	Cd101	CD101 antigen	39.7602	13.8758	2.74003	1.45419	0.0336905	0.465881
ENSMUSG00000031938	4931406C07Rik	RIKEN cDNA 4931406C07 gene	6860.98	3545.12	1.93507	0.952384	0.0341111	0.47036
ENSMUSG00000037440	Vnn1	vanin 1	436.109	263.766	1.65093	0.723277	0.0344269	0.473351
ENSMUSG00000033860	Fgg	fibrinogen gamma chain	58.1862	23.2008	2.44563	1.29021	0.0346173	0.474808
ENSMUSG00000010044	Zmynd10	zinc finger, MYND domain containing 10	210.632	89.806	2.3306	1.2207	0.0346459	0.474881
ENSMUSG00000025403	Shmt2	serine hydroxymethyltransferase 2 (mitochondrial)	1684.84	1004.44	1.67671	0.745632	0.0349124	0.476606
ENSMUSG00000069805	Fbp1	fructose bisphosphatase 1	6029.56	2868.61	2.10152	1.07144	0.0350051	0.476606
ENSMUSG00000093044	Snord8	small nucleolar RNA, C/D box 8	54.5444	23.0136	2.31304	1.20979	0.0349735	0.476606
ENSMUSG00000081957	Ak3l2-ps	adenylate kinase 3-like 2, pseudogene	1014.63	327.636	3.09045	1.62782	0.0350539	0.476808
ENSMUSG00000017453	Pipox	pipecolic acid oxidase	1872.97	929.031	2.01495	1.01075	0.0351549	0.477479
ENSMUSG00000025731	Mettl26	methyltransferase like 26	799.024	509.499	1.56714	0.648135	0.0351627	0.477479
ENSMUSG00000026594	Ralgps2	Ral GEF with PH domain and SH3 binding motif 2	389.091	195.879	1.98137	0.986498	0.0352303	0.478079
ENSMUSG00000026123	Plekhb2	pleckstrin homology domain containing, family B (evectins) member 2	2584.92	1678.24	1.53994	0.622871	0.0352822	0.478147
ENSMUSG00000021732	Fgf10	fibroblast growth factor 10	12.0295	1.65894	4.90027	2.29286	0.0352782	0.478147
ENSMUSG00000022323	Rida	reactive intermediate imine deaminase A homolog	5075.74	2280.09	2.22557	1.15418	0.0356884	0.47976
ENSMUSG00000078502	Gm13212	predicted gene 13212	69.1179	27.7188	2.44153	1.28779	0.0355719	0.47976
ENSMUSG00000023073	Slc10a2	solute carrier family 10, member 2	138.239	62.7545	2.18399	1.12697	0.0356638	0.47976
ENSMUSG00000079641	Rpl39	ribosomal protein L39	271.447	162.158	1.66983	0.739704	0.0356156	0.47976
ENSMUSG00000042385	Gzmk	granzyme K	46.3935	4.34993	8.85872	3.1471	0.0358974	0.481374
ENSMUSG00000049608	Gpr55	G protein-coupled receptor 55	14.0931	1.10729	7.16232	2.84043	0.0359961	0.482381
ENSMUSG00000076747	Tcrg-V5	T cell receptor gamma, variable 5	5.73134	0	6.73134	2.75089	0.0360635	0.482542
ENSMUSG00000044303	Cdkn2a	cyclin-dependent kinase inhibitor 2A	5.96818	0	6.96818	2.80078	0.0360496	0.482542
ENSMUSG00000025937	Lactb2	lactamase, beta 2	5985.11	2820.59	2.12154	1.08511	0.0362076	0.482996
ENSMUSG00000022321	Cdh10	cadherin 10	7.73595	0.331787	6.55957	2.7136	0.0362626	0.483415
ENSMUSG00000055170	Ifng	interferon gamma	130.983	15.7258	7.89095	2.9802	0.0363072	0.483693
ENSMUSG00000041052	Slc7a13	solute carrier family 7, (cationic amino acid transporter, y+ system) member 13	5337.59	2358.17	2.26292	1.17818	0.0365037	0.483869
ENSMUSG00000030792	Dkkl1	dickkopf-like 1	8.85448	0	9.85448	3.30078	0.0365573	0.483869
ENSMUSG00000006589	Aprt	adenine phosphoribosyl transferase	311.655	182.053	1.708	0.772309	0.0364694	0.483869
ENSMUSG00000029455	Aldh2	aldehyde dehydrogenase 2, mitochondrial	4254.46	2482.68	1.71337	0.776835	0.0366857	0.484627
ENSMUSG00000028085	Gatb	glutamyl-tRNA(Gln) amidotransferase, subunit B	543.31	328.811	1.65037	0.722789	0.0367529	0.485201
ENSMUSG00000029735	Tpk1	thiamine pyrophosphokinase	399.568	244.742	1.63004	0.704903	0.036928	0.485941
ENSMUSG00000020051	Pah	phenylalanine hydroxylase	7964.92	3782.67	2.10534	1.07405	0.0370425	0.486508
ENSMUSG00000028692	Akr1a1	aldo-keto reductase family 1, member A1 (aldehyde reductase)	10683.9	5801.44	1.84146	0.880847	0.0370047	0.486508
ENSMUSG00000076770	Trav8d-1	T cell receptor alpha variable 8D-1	5.65153	0	6.65153	2.73369	0.0373348	0.488775
ENSMUSG00000032403	2300009A05Rik	RIKEN cDNA 2300009A05 gene	111.572	59.5947	1.85779	0.893585	0.0374727	0.489848
ENSMUSG00000028603	Scp2	sterol carrier protein 2, liver	2178.09	1268.56	1.71641	0.779394	0.0376146	0.491178
ENSMUSG00000001497	Pax9	paired box 9	16.8059	3.8052	3.70554	1.88969	0.0379362	0.493485
ENSMUSG00000023914	Mep1a	meprin 1 alpha	3534.46	1837.31	1.92321	0.943517	0.0380028	0.494037
ENSMUSG00000029695	Aass	aminoadipate-semialdehyde synthase	3020.22	1692.9	1.78359	0.834781	0.0381034	0.495029
ENSMUSG00000049410	Zfp683	zinc finger protein 683	62.0757	4.34595	11.7988	3.56057	0.0381453	0.495258
ENSMUSG00000017737	Mmp9	matrix metallopeptidase 9	70.4814	18.7686	3.61591	1.85436	0.0383733	0.49727
ENSMUSG00000070705	Eid2b	EP300 interacting inhibitor of differentiation 2B	98.3453	50.259	1.9381	0.954646	0.0384445	0.497878
ENSMUSG00000026617	Bpnt1	bisphosphate 3'-nucleotidase 1	2212.26	1451.75	1.5235	0.607388	0.0386466	0.498508
ENSMUSG00000048251	Bcl11b	B cell leukemia/lymphoma 11B	557.344	168.308	3.2978	1.72151	0.0386514	0.498508
ENSMUSG00000037754	Ppp1r16b	protein phosphatase 1, regulatory (inhibitor) subunit 16B	3514.74	2222.68	1.58104	0.660878	0.0387373	0.498508
ENSMUSG00000033933	Vhl	von Hippel-Lindau tumor suppressor	168.895	92.1523	1.82384	0.866976	0.0386917	0.498508
ENSMUSG00000031828	Klhl36	kelch-like 36	162.69	92.7237	1.74652	0.804483	0.0388176	0.498983
ENSMUSG00000078965	Gm12033	predicted gene 12033	26.3758	7.63221	3.17135	1.6651	0.0388773	0.499366
ENSMUSG00000076392	Gm25992	predicted gene, 25992	7.82331	0.342692	6.57136	2.71619	0.0389042	0.499397
ENSMUSG00000021474	Sfxn1	sideroflexin 1	2273.97	1229.95	1.84815	0.886079	0.0389887	0.500167
ENSMUSG00000020267	Hint1	histidine triad nucleotide binding protein 1	2088.08	1360.16	1.53477	0.618025	0.0391569	0.501087
ENSMUSG00000085694	Gm14967	predicted gene 14967	16.6851	4.11916	3.45469	1.78856	0.0391284	0.501087
ENSMUSG00000075704	Txnrd2	thioredoxin reductase 2	196.219	117.056	1.67055	0.740324	0.0392929	0.501423
ENSMUSG00000025059	Gk	glycerol kinase	4188.26	2098.52	1.99534	0.996634	0.0393076	0.501423
ENSMUSG00000084319	Tpt1-ps3	tumor protein, translationally-controlled, pseudogene 3	13702.6	8920.07	1.53609	0.619266	0.0393816	0.502054
ENSMUSG00000001999	Blvra	biliverdin reductase A	465.198	271.789	1.70901	0.773158	0.0397127	0.505014
ENSMUSG00000026415	Fcamr	Fc receptor, IgA, IgM, high affinity	618.944	276.871	2.23105	1.15772	0.0397447	0.505107
ENSMUSG00000020309	Chac2	ChaC, cation transport regulator 2	255.36	117.053	2.17158	1.11874	0.0398534	0.505858
ENSMUSG00000018677	Slc25a39	solute carrier family 25, member 39	3345.93	2210	1.51377	0.598144	0.0404224	0.507824
ENSMUSG00000006378	Gcat	glycine C-acetyltransferase (2-amino-3-ketobutyrate-coenzyme A ligase)	381.052	228.295	1.6662	0.736562	0.0402853	0.507824
ENSMUSG00000048087	Gm4737	predicted gene 4737	549.486	332.614	1.65007	0.722527	0.0400682	0.507824
ENSMUSG00000018459	Slc13a3	solute carrier family 13 (sodium-dependent dicarboxylate transporter), member 3	4926.03	2824.58	1.74372	0.802169	0.0405629	0.507824
ENSMUSG00000043484	Gm5867	predicted gene 5867	198.175	121.152	1.63054	0.705352	0.0404753	0.507824
ENSMUSG00000089809	A930011G23Rik	RIKEN cDNA A930011G23 gene	15.0532	2.37703	4.75363	2.24903	0.0402654	0.507824
ENSMUSG00000034875	Nudt19	nudix (nucleoside diphosphate linked moiety X)-type motif 19	2661.72	1548.18	1.71879	0.781392	0.0403125	0.507824
ENSMUSG00000002033	Cd3g	CD3 antigen, gamma polypeptide	319.434	36.7475	8.48886	3.08557	0.0401488	0.507824
ENSMUSG00000032327	Stra6	stimulated by retinoic acid gene 6	34.7372	11.3444	2.89502	1.53357	0.0402377	0.507824
ENSMUSG00000048534	Amica1	adhesion molecule, interacts with CXADR antigen 1	71.8457	27.7735	2.5317	1.3401	0.0407339	0.508504
ENSMUSG00000024696	Lpxn	leupaxin	182.726	69.3453	2.61178	1.38503	0.0408123	0.508858
ENSMUSG00000003949	Hlf	hepatic leukemia factor	1230.51	514.662	2.3882	1.25593	0.0409348	0.509086
ENSMUSG00000031584	Gsr	glutathione reductase	1948.27	1120.44	1.73819	0.797582	0.0408983	0.509086
ENSMUSG00000032561	Acpp	acid phosphatase, prostate	155.054	63.9368	2.40317	1.26494	0.0410577	0.50943
ENSMUSG00000049093	Il23r	interleukin 23 receptor	26.4748	0.331787	20.63	4.36667	0.0415668	0.512393
ENSMUSG00000022562	Oplah	5-oxoprolinase (ATP-hydrolysing)	1298.85	823.773	1.57601	0.656276	0.0417684	0.513941
ENSMUSG00000042118	Bhmt2	betaine-homocysteine methyltransferase 2	492.493	220.419	2.22878	1.15625	0.0419368	0.515638
ENSMUSG00000005656	Snx6	sorting nexin 6	1036.01	571.345	1.81186	0.857473	0.0421152	0.516863
ENSMUSG00000076926	Traj2	T cell receptor alpha joining 2	6.22979	0	7.22979	2.85395	0.0421019	0.516863
ENSMUSG00000055312	Them7	thioesterase superfamily member 7	785.617	417.521	1.87951	0.91036	0.0423532	0.518884
ENSMUSG00000022657	Cd96	CD96 antigen	71.6554	3.67545	15.5398	3.95789	0.042769	0.521787
ENSMUSG00000021033	Gstz1	glutathione transferase zeta 1 (maleylacetoacetate isomerase)	2268.56	1170.62	1.93712	0.953911	0.0428323	0.522018
ENSMUSG00000062582	Rpl30-ps8	ribosomal protein L30, pseudogene 8	60.624	30.419	1.96136	0.971857	0.0428979	0.522018
ENSMUSG00000044647	Csrnp3	cysteine-serine-rich nuclear protein 3	136.724	48.2911	2.7941	1.48238	0.0429139	0.522018
ENSMUSG00000069733	Ube2u	ubiquitin-conjugating enzyme E2U (putative)	72.5032	25.963	2.72608	1.44683	0.0428775	0.522018
ENSMUSG00000084265	Gm14541	predicted gene 14541	28.6803	1.34896	12.6355	3.65941	0.0430397	0.522281
ENSMUSG00000021786	Oxsm	3-oxoacyl-ACP synthase, mitochondrial	346.96	219.812	1.57582	0.656103	0.0431796	0.522736
ENSMUSG00000073639	Rab18	RAB18, member RAS oncogene family	858.274	547.756	1.56586	0.646954	0.0431244	0.522736
ENSMUSG00000026473	Glul	glutamate-ammonia ligase (glutamine synthetase)	3796.28	2288.35	1.65867	0.730027	0.0432694	0.522755
ENSMUSG00000060992	Copz1	coatomer protein complex, subunit zeta 1	822.866	536.222	1.53357	0.616892	0.0432346	0.522755
ENSMUSG00000025525	Apool	apolipoprotein O-like	256.698	159.41	1.6065	0.683922	0.0432163	0.522755
ENSMUSG00000039438	Ttc36	tetratricopeptide repeat domain 36	2279.91	1105.73	2.06095	1.04331	0.0433886	0.523361
ENSMUSG00000043618	Eif5al3-ps	eukaryotic translation initiation factor 5A-like 3, pseudogene	157.176	92.1967	1.69723	0.763178	0.0434859	0.523651
ENSMUSG00000048215	A630023P12Rik	RIKEN cDNA A630023P12 gene	14.9956	0.663575	9.61521	3.26532	0.0440107	0.527115
ENSMUSG00000085998	AW822252	expressed sequence AW822252	26.5652	9.34965	2.6634	1.41327	0.0443811	0.528819
ENSMUSG00000020279	Il9r	interleukin 9 receptor	24.4207	2.32649	7.64189	2.93393	0.0444198	0.528971
ENSMUSG00000050271	D8Ertd82e	DNA segment, Chr 8, ERATO Doi 82, expressed	332.919	207.329	1.60285	0.680635	0.0445929	0.530723
ENSMUSG00000010025	Aldh3a2	aldehyde dehydrogenase family 3, subfamily A2	2218.66	1119.22	1.98144	0.986548	0.0446678	0.530996
ENSMUSG00000024910	Ctsw	cathepsin W	200.521	37.2338	5.27074	2.39801	0.0447237	0.531302
ENSMUSG00000030674	Qprt	quinolinate phosphoribosyltransferase	328.822	187.448	1.7502	0.807521	0.0447717	0.531302
ENSMUSG00000076928	Trac	T cell receptor alpha constant	180.482	30.7903	5.70874	2.51317	0.0450366	0.532919
ENSMUSG00000063052	Lrrc40	leucine rich repeat containing 40	145.573	85.4527	1.69541	0.761635	0.0452311	0.53458
ENSMUSG00000073684	Faap20	Fanconi anemia core complex associated protein 20	123.89	67.5915	1.82078	0.86456	0.0454146	0.535229
ENSMUSG00000074261	Erich4	glutamate rich 4	591.62	309.411	1.90915	0.932929	0.0453982	0.535229
ENSMUSG00000046808	Atp10d	ATPase, class V, type 10D	490.336	299.449	1.63534	0.709589	0.045514	0.536062
ENSMUSG00000035878	Hykk	hydroxylysine kinase 1	5019.07	2559.24	1.96078	0.971428	0.0458641	0.538894
ENSMUSG00000022512	Cldn1	claudin 1	122.175	65.9364	1.84017	0.879841	0.0460709	0.539606
ENSMUSG00000042978	Sbk1	SH3-binding kinase 1	655.968	424.503	1.54398	0.626656	0.0460066	0.539606
ENSMUSG00000000154	Slc22a18	solute carrier family 22 (organic cation transporter), member 18	1233.98	791.815	1.55771	0.639427	0.0460739	0.539606
ENSMUSG00000033854	Kcnk10	potassium channel, subfamily K, member 10	5.60403	0	6.60403	2.72335	0.0464563	0.541096
ENSMUSG00000021486	Prelid1	PRELI domain containing 1	1182.74	781.284	1.51318	0.597587	0.0464654	0.541096
ENSMUSG00000072594	Gm16439	predicted pseudogene 16439	367.585	228.567	1.60556	0.683079	0.0464713	0.541096
ENSMUSG00000024866	Acy3	aspartoacylase (aminoacylase) 3	9332.47	5476.81	1.70387	0.768815	0.0464431	0.541096
ENSMUSG00000028398	Tmem261	transmembrane protein 261	222.929	132.309	1.67978	0.74827	0.0465358	0.541539
ENSMUSG00000060438	Rps10-ps1	ribosomal protein S10, pseudogene 1	673.468	441.805	1.52317	0.60708	0.0466604	0.54268
ENSMUSG00000057058	Skap1	src family associated phosphoprotein 1	184.152	32.1539	5.58462	2.48146	0.0467676	0.543613
ENSMUSG00000022235	Cmbl	carboxymethylenebutenolidase-like (Pseudomonas)	1354.03	648.576	2.08602	1.06075	0.0468329	0.543756
ENSMUSG00000019738	Polr2i	polymerase (RNA) II (DNA directed) polypeptide I	167.704	94.3906	1.76856	0.822574	0.0470895	0.546048
ENSMUSG00000073844	Gm21957	predicted gene, 21957	182.023	106.887	1.69644	0.762511	0.0472222	0.546723
ENSMUSG00000092416	Zfp141	zinc finger protein 141	127.484	61.7359	2.04802	1.03423	0.0472052	0.546723
ENSMUSG00000020803	Txndc17	thioredoxin domain containing 17	629.432	405.719	1.55004	0.632306	0.0475359	0.548838
ENSMUSG00000038967	Pdk2	pyruvate dehydrogenase kinase, isoenzyme 2	2326.86	1553.58	1.49742	0.582478	0.0475908	0.548838
ENSMUSG00000071552	Tigit	T cell immunoreceptor with Ig and ITIM domains	103.307	18.7774	5.27405	2.39891	0.047593	0.548838
ENSMUSG00000053600	Zfp472	zinc finger protein 472	70.4481	36.2535	1.91789	0.939521	0.0475094	0.548838
ENSMUSG00000029193	Cckar	cholecystokinin A receptor	419.981	227.772	1.84018	0.879843	0.0475643	0.548838
ENSMUSG00000006567	Atp7b	ATPase, Cu++ transporting, beta polypeptide	33.9865	12.1159	2.66749	1.41548	0.0475152	0.548838
ENSMUSG00000089169	Gm25413	predicted gene, 25413	6.47865	0	7.47865	2.90278	0.0481041	0.551732
ENSMUSG00000020644	Id2	inhibitor of DNA binding 2	2532.9	1665.93	1.5201	0.604164	0.0480996	0.551732
ENSMUSG00000028124	Gclm	glutamate-cysteine ligase, modifier subunit	1543.69	920.945	1.67546	0.744561	0.0481952	0.551732
ENSMUSG00000066829	Zfp810	zinc finger protein 810	209.411	128.955	1.61911	0.695197	0.0481806	0.551732
ENSMUSG00000024391	Apom	apolipoprotein M	436.895	284.922	1.53152	0.614963	0.0482585	0.552148
ENSMUSG00000067344	Rps25-ps1	ribosomal protein S25, pseudogene 1	769.264	494.767	1.55368	0.635689	0.048595	0.553208
ENSMUSG00000020089	Ppa1	pyrophosphatase (inorganic) 1	219.485	130.8	1.67287	0.742328	0.0487112	0.553913
ENSMUSG00000006273	Atp6v1b2	ATPase, H+ transporting, lysosomal V1 subunit B2	2716.49	1745.61	1.55586	0.637717	0.0488018	0.554326
ENSMUSG00000030225	Dera	deoxyribose-phosphate aldolase (putative)	351.545	210.613	1.66599	0.73638	0.0489556	0.555468
ENSMUSG00000025936	Gm4956	predicted gene 4956	41.7943	18.6132	2.18192	1.1256	0.049064	0.556377
ENSMUSG00000028007	Snx7	sorting nexin 7	1017.71	577.031	1.76239	0.817531	0.049226	0.556747
ENSMUSG00000039774	Galnt12	UDP-N-acetyl-alpha-D-galactosamine:polypeptide N-acetylgalactosaminyltransferase 12	74.5183	25.5123	2.84842	1.51016	0.0492258	0.556747
ENSMUSG00000046994	Mars2	methionine-tRNA synthetase 2 (mitochondrial)	85.1257	45.622	1.84732	0.885432	0.0493236	0.557463
ENSMUSG00000026770	Il2ra	interleukin 2 receptor, alpha chain	202.604	33.5802	5.88787	2.55775	0.0494685	0.557607
ENSMUSG00000028559	Osbpl9	oxysterol binding protein-like 9	3094.82	2085.02	1.48407	0.569564	0.0494622	0.557607
ENSMUSG00000023274	Cd4	CD4 antigen	227.828	77.4014	2.91867	1.54531	0.0494442	0.557607
ENSMUSG00000076680	Ighv6-6	immunoglobulin heavy variable 6-6	9.0318	0.331787	7.53259	2.91315	0.049549	0.557849
ENSMUSG00000032066	Bco2	beta-carotene oxygenase 2	154.021	94.5967	1.62161	0.697429	0.0500042	0.56128
ENSMUSG00000040966	Slc22a2	solute carrier family 22 (organic cation transporter), member 2	1375.77	895.161	1.53629	0.619452	0.0502266	0.562996
ENSMUSG00000061119	Prcp	prolylcarboxypeptidase (angiotensinase C)	526.572	336.3	1.5641	0.645336	0.0503685	0.563967
ENSMUSG00000020003	Pex7	peroxisomal biogenesis factor 7	436.144	281.925	1.54509	0.627687	0.0508886	0.567184
ENSMUSG00000022751	Nit2	nitrilase family, member 2	457.825	230.715	1.98013	0.985594	0.0507934	0.567184
ENSMUSG00000034871	Fam151a	family with sequence simliarity 151, member A	202.978	122.122	1.65671	0.728324	0.0508612	0.567184
ENSMUSG00000029173	Sepsecs	Sep (O-phosphoserine) tRNA:Sec (selenocysteine) tRNA synthase	535.681	336.52	1.59007	0.669093	0.0507814	0.567184
ENSMUSG00000030630	Fah	fumarylacetoacetate hydrolase	2751.71	1444.67	1.9041	0.929111	0.0509057	0.567184
ENSMUSG00000076435	Acsf2	acyl-CoA synthetase family member 2	133.642	78.3497	1.69681	0.762828	0.0511136	0.568879
ENSMUSG00000037601	Nme1	NME/NM23 nucleoside diphosphate kinase 1	246.896	148.397	1.65931	0.730582	0.0512282	0.569088
ENSMUSG00000025868	Higd2a	HIG1 domain family, member 2A	575.511	365.025	1.57506	0.655407	0.0514134	0.569732
ENSMUSG00000036820	Amdhd2	amidohydrolase domain containing 2	458.44	281.4	1.62691	0.702137	0.0513404	0.569732
ENSMUSG00000056486	Chn1	chimerin 1	122.399	49.6202	2.43774	1.28554	0.0513873	0.569732
ENSMUSG00000040570	Rundc3b	RUN domain containing 3B	26.2961	8.57703	2.85016	1.51104	0.0513895	0.569732
ENSMUSG00000001891	Ugp2	UDP-glucose pyrophosphorylase 2	1061.22	683.398	1.55206	0.634182	0.0515492	0.570617
ENSMUSG00000045699	Gm21411	predicted gene, 21411	10.9621	1.551	4.68917	2.22933	0.051964	0.572726
ENSMUSG00000002769	Gnmt	glycine N-methyltransferase	104.258	58.4857	1.76947	0.823318	0.0521197	0.573823
ENSMUSG00000023030	Slc11a2	solute carrier family 11 (proton-coupled divalent metal ion transporters), member 2	578.474	370.332	1.56053	0.642034	0.0522238	0.574323
ENSMUSG00000041997	Tlk1	tousled-like kinase 1	1959.38	1298.86	1.50816	0.592785	0.052352	0.574323
ENSMUSG00000038388	Mpp6	membrane protein, palmitoylated 6 (MAGUK p55 subfamily member 6)	1400.77	913.728	1.53245	0.615839	0.0522567	0.574323
ENSMUSG00000079494	Nat8f5	N-acetyltransferase 8 (GCN5-related) family member 5	150.325	88.9058	1.68315	0.751168	0.0523902	0.574323
ENSMUSG00000025027	Xpnpep1	X-prolyl aminopeptidase (aminopeptidase P) 1, soluble	1584.31	905.304	1.7492	0.806696	0.05246	0.57478
ENSMUSG00000032309	Fbxo22	F-box protein 22	781.574	520.879	1.49953	0.584511	0.0525161	0.575087
ENSMUSG00000035772	Mrps2	mitochondrial ribosomal protein S2	408.22	269.378	1.51351	0.597901	0.052605	0.575443
ENSMUSG00000032094	Cd3d	CD3 antigen, delta polypeptide	58.3678	8.12346	6.50715	2.70203	0.0527175	0.576365
ENSMUSG00000032413	Rasa2	RAS p21 protein activator 2	531.912	356.41	1.49104	0.576319	0.0529216	0.577977
ENSMUSG00000073609	D2hgdh	D-2-hydroxyglutarate dehydrogenase	255.493	155.241	1.64165	0.715146	0.053097	0.579583
ENSMUSG00000025815	Dhtkd1	dehydrogenase E1 and transketolase domain containing 1	637.113	300.289	2.11794	1.08266	0.0532237	0.580656
ENSMUSG00000091679	Vmn2r96	vomeronasal 2, receptor 96	13.1183	0	14.1183	3.8195	0.05331	0.580694
ENSMUSG00000041912	Tdrkh	tudor and KH domain containing protein	70.7825	38.4502	1.81957	0.8636	0.0534232	0.580694
ENSMUSG00000089659	Gm3470	predicted gene 3470	307.163	188.011	1.6304	0.705227	0.053384	0.580694
ENSMUSG00000036814	Slc6a20a	solute carrier family 6 (neurotransmitter transporter), member 20A	57.5489	29.5385	1.91722	0.939016	0.0532859	0.580694
ENSMUSG00000069682	Gm10275	predicted pseudogene 10275	1421.55	940	1.51174	0.596209	0.0535649	0.581225
ENSMUSG00000032098	Treh	trehalase (brush-border membrane glycoprotein)	661.227	378.397	1.74547	0.803616	0.053589	0.581225
ENSMUSG00000020395	Itk	IL2 inducible T cell kinase	844.809	123.274	6.80599	2.7668	0.0537104	0.582011
ENSMUSG00000028150	Rorc	RAR-related orphan receptor gamma	245.786	135.504	1.8079	0.854313	0.0538186	0.582788
ENSMUSG00000021451	Sema4d	sema domain, immunoglobulin domain (Ig), transmembrane domain (TM) and short cytoplasmic domain, (semaphorin) 4D	1497.88	1013.53	1.47741	0.563074	0.0539709	0.58364
ENSMUSG00000071716	Apol7e	apolipoprotein L 7e	58.6559	8.05013	6.59172	2.72065	0.0540652	0.58373
ENSMUSG00000007415	Gatad1	GATA zinc finger domain containing 1	1080.67	714.692	1.51137	0.595856	0.0542728	0.584607
ENSMUSG00000021384	Susd3	sushi domain containing 3	313.023	194.637	1.60513	0.682688	0.054568	0.587263
ENSMUSG00000031294	D630029K05Rik	RIKEN cDNA D630029K05 gene	509.939	230.628	2.20586	1.14134	0.0549534	0.59007
ENSMUSG00000022210	Dhrs4	dehydrogenase/reductase (SDR family) member 4	1408.83	790.392	1.78145	0.833055	0.0549346	0.59007
ENSMUSG00000025196	Cpn1	carboxypeptidase N, polypeptide 1	364.178	169.72	2.13904	1.09696	0.0550675	0.590666
ENSMUSG00000068205	Macrod2	MACRO domain containing 2	1545.17	764.53	2.01973	1.01416	0.0551535	0.590666
ENSMUSG00000058186	Zfp980	zinc finger protein 980	7.0413	0.342692	5.98894	2.5823	0.0551007	0.590666
ENSMUSG00000051262	Nat8f3	N-acetyltransferase 8 (GCN5-related) family member 3	25.4287	8.3285	2.83311	1.50239	0.0551515	0.590666
ENSMUSG00000037849	Ifi206	interferon activated gene 206	114.941	43.2279	2.62146	1.39037	0.0555075	0.591307
ENSMUSG00000062397	Zfp706	zinc finger protein 706	1340.03	915.417	1.46335	0.549271	0.0555834	0.591307
ENSMUSG00000031485	Prosc	proline synthetase co-transcribed	1319.11	883.896	1.49182	0.577078	0.0556032	0.591307
ENSMUSG00000028743	Akr7a5	aldo-keto reductase family 7, member A5 (aflatoxin aldehyde reductase)	1730.17	989.214	1.74828	0.805939	0.0559538	0.592627
ENSMUSG00000056973	Ces1d	carboxylesterase 1D	1377.1	917.422	1.5005	0.585446	0.0563149	0.5953
ENSMUSG00000071711	Mpst	mercaptopyruvate sulfurtransferase	313.44	183.429	1.70494	0.76972	0.0563495	0.595357
ENSMUSG00000067613	Krt83	keratin 83	26.1173	4.31722	5.0999	2.35047	0.0564874	0.595582
ENSMUSG00000081666	Gm11677	predicted gene 11677	5.11104	0	6.11104	2.61142	0.0567175	0.596858
ENSMUSG00000076914	Traj15	T cell receptor alpha joining 15	14.2204	1.00627	7.58642	2.92342	0.0567253	0.596858
ENSMUSG00000042041	2010003K11Rik	RIKEN cDNA 2010003K11 gene	17.5714	4.31434	3.49458	1.80512	0.0568342	0.596935
ENSMUSG00000072664	Ugt3a1	UDP glycosyltransferases 3 family, polypeptide A1	591.909	324.436	1.82189	0.865438	0.0574998	0.599754
ENSMUSG00000042203	Tbc1d22b	TBC1 domain family, member 22B	608.098	400.142	1.51841	0.602561	0.0574101	0.599754
ENSMUSG00000039069	Mtg2	mitochondrial ribosome associated GTPase 2	218.917	128.476	1.69852	0.76428	0.0573248	0.599754
ENSMUSG00000082082	Gm13230	predicted gene 13230	8.09017	0.663575	5.46424	2.45002	0.05745	0.599754
ENSMUSG00000056204	Pgpep1	pyroglutamyl-peptidase I	690.802	397.629	1.73545	0.795313	0.0573131	0.599754
ENSMUSG00000040740	Slc25a34	solute carrier family 25, member 34	244.102	126.018	1.92966	0.948349	0.0575764	0.600246
ENSMUSG00000022574	Naprt	nicotinate phosphoribosyltransferase	198.723	103.987	1.90236	0.92779	0.0576611	0.600298
ENSMUSG00000024131	Slc3a1	solute carrier family 3, member 1	2592.55	1511.63	1.7146	0.777874	0.057632	0.600298
ENSMUSG00000020020	Usp44	ubiquitin specific peptidase 44	5.43238	0	6.43238	2.68535	0.0577058	0.60037
ENSMUSG00000090186	Gm7592	predicted gene 7592	10.6848	1.65894	4.39455	2.13572	0.0579368	0.601547
ENSMUSG00000013707	Tnfaip8l2	tumor necrosis factor, alpha-induced protein 8-like 2	75.6249	38.7442	1.92795	0.947068	0.0580681	0.602145
ENSMUSG00000030559	Rab38	RAB38, member RAS oncogene family	53.3904	25.6134	2.04373	1.0312	0.0581123	0.602145
ENSMUSG00000083854	Dnajc19-ps	DnaJ heat shock protein family (Hsp40) member C19, pseudogene	422.01	278.52	1.51334	0.597736	0.0580962	0.602145
ENSMUSG00000037280	Galnt6	UDP-N-acetyl-alpha-D-galactosamine:polypeptide N-acetylgalactosaminyltransferase 6	109.061	46.4933	2.3174	1.21251	0.0582179	0.602323
ENSMUSG00000052316	Lrrc15	leucine rich repeat containing 15	23.8568	7.28952	2.99858	1.58428	0.058198	0.602323
ENSMUSG00000028571	Cyp2j13	cytochrome P450, family 2, subfamily j, polypeptide 13	3962.56	2400.11	1.65072	0.723097	0.0581666	0.602323
ENSMUSG00000076137	Gm26384	predicted gene, 26384	102.587	58.5372	1.73987	0.798978	0.0584536	0.603537
ENSMUSG00000027227	Sord	sorbitol dehydrogenase	5786.44	2796.59	2.06872	1.04874	0.0584254	0.603537
ENSMUSG00000040181	Fmo1	flavin containing monooxygenase 1	4798.76	2550.73	1.88098	0.911488	0.0588102	0.603791
ENSMUSG00000076613	Ighg2b	immunoglobulin heavy constant gamma 2B	167.966	23.711	6.83768	2.77351	0.0589807	0.603791
ENSMUSG00000006717	Acot13	acyl-CoA thioesterase 13	1440.43	914.93	1.57374	0.654193	0.0585971	0.603791
ENSMUSG00000028405	Aco1	aconitase 1	2324.51	1543.06	1.5061	0.590817	0.0586356	0.603791
ENSMUSG00000060317	Acnat2	acyl-coenzyme A amino acid N-acyltransferase 2	1169.44	627.663	1.8618	0.896698	0.0588088	0.603791
ENSMUSG00000055850	Rnf181	ring finger protein 181	1735.02	1055.75	1.64279	0.71615	0.0586856	0.603791
ENSMUSG00000022366	Slc22a22	solute carrier family 22 (organic cation transporter), member 22	453.24	263.435	1.71777	0.780541	0.0590439	0.604075
ENSMUSG00000028393	Alad	aminolevulinate, delta-, dehydratase	717.627	447.345	1.60284	0.680635	0.0590971	0.604075
ENSMUSG00000026687	Aldh9a1	aldehyde dehydrogenase 9, subfamily A1	3233.33	1967.16	1.64333	0.716621	0.059331	0.606162
ENSMUSG00000039678	Tbc1d13	TBC1 domain family, member 13	1245.31	753.641	1.65152	0.723799	0.0595274	0.60756
ENSMUSG00000026285	Pdcd1	programmed cell death 1	140.791	11.3007	11.5271	3.52696	0.0595846	0.607778
ENSMUSG00000073988	Ttpa	tocopherol (alpha) transfer protein	88.4025	42.6915	2.04622	1.03296	0.0596966	0.60808
ENSMUSG00000022040	Ephx2	epoxide hydrolase 2, cytoplasmic	3559.47	2139.96	1.66303	0.733811	0.0598241	0.60846
ENSMUSG00000031402	Mpp1	membrane protein, palmitoylated	1810.07	1036.12	1.74625	0.804258	0.0597961	0.60846
ENSMUSG00000039206	Daglb	diacylglycerol lipase, beta	330.753	207.382	1.59204	0.670878	0.0600339	0.609067
ENSMUSG00000050232	Cxcr3	chemokine (C-X-C motif) receptor 3	94.471	12.3248	7.16492	2.84095	0.0600255	0.609067
ENSMUSG00000030474	Siglece	sialic acid binding Ig-like lectin E	201.146	83.2034	2.40068	1.26345	0.0601313	0.609416
ENSMUSG00000091498	Mpc1-ps	mitochondrial pyruvate carrier 1, pseudogene	1022.36	678.579	1.50588	0.590602	0.0603499	0.610767
ENSMUSG00000024661	Fth1	ferritin heavy polypeptide 1	19992.6	13648.9	1.46474	0.550643	0.0604535	0.611511
ENSMUSG00000030844	Rgs10	regulator of G-protein signalling 10	255.902	162.053	1.57557	0.655878	0.0605206	0.611688
ENSMUSG00000020917	Acly	ATP citrate lyase	2252.69	1484.32	1.51731	0.601513	0.0608355	0.613104
ENSMUSG00000001755	Coasy	Coenzyme A synthase	1290.9	843.346	1.53006	0.613593	0.0608654	0.613104
ENSMUSG00000057880	Abat	4-aminobutyrate aminotransferase	1853.04	1127.46	1.64298	0.716317	0.061241	0.615066
ENSMUSG00000070713	Gm10282	predicted pseudogene 10282	256.523	151.143	1.69263	0.75927	0.0612567	0.615066
ENSMUSG00000026667	Uhmk1	U2AF homology motif (UHM) kinase 1	2382.25	1604.03	1.48486	0.570329	0.061632	0.615831
ENSMUSG00000046687	Gm5424	predicted gene 5424	25512	13276.2	1.92156	0.94228	0.0615408	0.615831
ENSMUSG00000076864	Trdv1	T cell receptor delta variable 1	10.9642	0	11.9642	3.58066	0.061798	0.615831
ENSMUSG00000030800	Prss8	protease, serine 8 (prostasin)	1237.87	789.178	1.56784	0.648777	0.0616083	0.615831
ENSMUSG00000032281	Acsbg1	acyl-CoA synthetase bubblegum family member 1	48.2738	8.91679	4.96872	2.31287	0.0616762	0.615831
ENSMUSG00000032560	Dnajc13	DnaJ heat shock protein family (Hsp40) member C13	4935.64	3398.97	1.45197	0.538008	0.0617829	0.615831
ENSMUSG00000060002	Chpt1	choline phosphotransferase 1	7016.24	4852.45	1.44583	0.531893	0.0620481	0.616283
ENSMUSG00000021665	Hexb	hexosaminidase B	639.62	419.251	1.52438	0.608218	0.0619369	0.616283
ENSMUSG00000028470	Hint2	histidine triad nucleotide binding protein 2	653.272	426.82	1.52932	0.612886	0.0620513	0.616283
ENSMUSG00000038072	Galnt11	UDP-N-acetyl-alpha-D-galactosamine:polypeptide N-acetylgalactosaminyltransferase 11	4093.6	2625.04	1.55923	0.640836	0.0619479	0.616283
ENSMUSG00000030742	Lat	linker for activation of T cells	138.308	21.614	6.16024	2.62299	0.062019	0.616283
ENSMUSG00000024575	Pde6a	phosphodiesterase 6A, cGMP-specific, rod, alpha	279.988	171.248	1.6313	0.706019	0.0623447	0.616593
ENSMUSG00000058492	Scp2-ps2	sterol carrier protein 2, pseudogene 2	2291.95	1431.92	1.6002	0.678251	0.0622448	0.616593
ENSMUSG00000034663	Bmp2k	BMP2 inducible kinase	655.764	440.172	1.48868	0.574033	0.062536	0.617162
ENSMUSG00000031609	Sap30	sin3 associated polypeptide	949.136	476.274	1.99076	0.993317	0.0625258	0.617162
ENSMUSG00000076899	Traj30	T cell receptor alpha joining 30	6.87204	0	7.87204	2.97674	0.0626998	0.617184
ENSMUSG00000024772	Ehd1	EH-domain containing 1	1554.09	1050.8	1.4785	0.564135	0.0627066	0.617184
ENSMUSG00000047728	BC025446	cDNA sequence BC025446	184.911	99.7351	1.84554	0.884043	0.06292	0.618688
ENSMUSG00000024371	C2	complement component 2 (within H-2S)	83.7552	48.5873	1.70921	0.773332	0.0630107	0.618984
ENSMUSG00000026011	Ctla4	cytotoxic T-lymphocyte-associated protein 4	80.6796	13.2053	5.74995	2.52355	0.0632614	0.619292
ENSMUSG00000081604	Gm11518	predicted gene 11518	12.2366	3.23572	3.125	1.64386	0.0633036	0.619292
ENSMUSG00000047454	Gphn	gephyrin	1037.86	684.017	1.51655	0.600796	0.0631232	0.619292
ENSMUSG00000048521	Cxcr6	chemokine (C-X-C motif) receptor 6	340.562	45.0957	7.40984	2.88944	0.0632399	0.619292
ENSMUSG00000037759	Ptger2	prostaglandin E receptor 2 (subtype EP2)	16.1373	4.10428	3.35744	1.74736	0.0635395	0.619357
ENSMUSG00000030775	Trat1	T cell receptor associated transmembrane adaptor 1	16.8507	2.21457	5.55307	2.47329	0.0636587	0.619357
ENSMUSG00000024818	Slc25a45	solute carrier family 25, member 45	421.131	277.722	1.51452	0.598862	0.0636725	0.619357
ENSMUSG00000044145	1810024B03Rik	RIKEN cDNA 1810024B03 gene	32.9376	13.5015	2.34029	1.22669	0.0634144	0.619357
ENSMUSG00000028307	Aldob	aldolase B, fructose-bisphosphate	42136.6	23056.2	1.82752	0.869891	0.0636247	0.619357
ENSMUSG00000028639	Ybx1	Y box protein 1	6687.76	4554.7	1.46822	0.554066	0.0636855	0.619357
ENSMUSG00000031077	Fadd	Fas (TNFRSF6)-associated via death domain	111.355	65.1272	1.69907	0.764746	0.0635613	0.619357
ENSMUSG00000031734	Irx3	Iroquois related homeobox 3	550.419	348.996	1.5755	0.655811	0.0636051	0.619357
ENSMUSG00000025911	Adhfe1	alcohol dehydrogenase, iron containing, 1	1119.08	678.671	1.64797	0.720689	0.0644125	0.619417
ENSMUSG00000026012	Cd28	CD28 antigen	276.525	41.0161	6.60521	2.7236	0.0638722	0.619417
ENSMUSG00000020087	Tysnd1	trypsin domain containing 1	400.406	251.649	1.58879	0.667931	0.0643105	0.619417
ENSMUSG00000034641	Cd300ld	CD300 molecule like family member d	207.273	114.521	1.8029	0.850321	0.0642684	0.619417
ENSMUSG00000076746	Tcrg-V6	T cell receptor gamma, variable 6	20.0955	0	21.0955	4.39886	0.0643034	0.619417
ENSMUSG00000068120	Gm10231	predicted pseudogene 10231	9.34507	1.10729	4.90919	2.29549	0.0639937	0.619417
ENSMUSG00000057388	Mrpl18	mitochondrial ribosomal protein L18	586.2	380.337	1.53984	0.622785	0.0644415	0.619417
ENSMUSG00000053644	Aldh7a1	aldehyde dehydrogenase family 7, member A1	2465.08	1534.18	1.60638	0.683815	0.0642385	0.619417
ENSMUSG00000051154	Commd3	COMM domain containing 3	845.242	556.256	1.51859	0.602731	0.0643085	0.619417
ENSMUSG00000033308	Dpyd	dihydropyrimidine dehydrogenase	1178.54	725.038	1.62463	0.700112	0.0642514	0.619417
ENSMUSG00000046562	Unc119b	unc-119 lipid binding chaperone B	1391.65	930.315	1.49536	0.58049	0.0638917	0.619417
ENSMUSG00000030148	Clec4a2	C-type lectin domain family 4, member a2	70.613	26.7541	2.58027	1.36752	0.0643251	0.619417
ENSMUSG00000061959	Ces1e	carboxylesterase 1E	518.824	326.972	1.58497	0.664453	0.0641079	0.619417
ENSMUSG00000056290	Ms4a4b	membrane-spanning 4-domains, subfamily A, member 4B	187.315	38.8828	4.72171	2.23931	0.0645714	0.619737
ENSMUSG00000028070	Apoa1bp	apolipoprotein A-I binding protein	363.178	229.241	1.58173	0.661503	0.0646359	0.619737
ENSMUSG00000032392	Parp16	poly (ADP-ribose) polymerase family, member 16	141.271	83.3098	1.68748	0.754871	0.0645782	0.619737
ENSMUSG00000086324	Gm15564	predicted gene 15564	1726.3	1146.38	1.50543	0.590173	0.0647195	0.619965
ENSMUSG00000061330	Gm11361	predicted pseudogene 11361	646.479	422.831	1.52768	0.611343	0.0648392	0.620278
ENSMUSG00000054733	Msra	methionine sulfoxide reductase A	1482.94	854.589	1.73441	0.794445	0.0648432	0.620278
ENSMUSG00000086052	Gm11802	predicted gene 11802	7.6308	0.331787	6.48061	2.69613	0.0649201	0.620366
ENSMUSG00000015806	Qdpr	quinoid dihydropteridine reductase	1410.63	873.249	1.61468	0.691248	0.0649436	0.620366
ENSMUSG00000043832	Clec4a3	C-type lectin domain family 4, member a3	129.835	63.6086	2.02504	1.01795	0.0648977	0.620366
ENSMUSG00000025461	Cd163l1	CD163 molecule-like 1	91.2608	0.674479	55.0982	5.78393	0.0651111	0.621095
ENSMUSG00000029201	Ugdh	UDP-glucose dehydrogenase	541.368	362.656	1.49143	0.576697	0.065277	0.622387
ENSMUSG00000041625	Ggact	gamma-glutamylamine cyclotransferase	505.723	302.111	1.67174	0.741353	0.0655408	0.624319
ENSMUSG00000023367	Tmem176a	transmembrane protein 176A	2040.59	1359.73	1.50036	0.585309	0.0655895	0.624491
ENSMUSG00000049922	Slc35c1	solute carrier family 35, member C1	204.757	125.327	1.62877	0.70378	0.065782	0.624619
ENSMUSG00000059159	Gm8129	predicted pseudogene 8129	512.325	333.27	1.53566	0.618859	0.0657983	0.624619
ENSMUSG00000084230	Gm14388	predicted gene 14388	25.6593	10.3341	2.35214	1.23397	0.0657212	0.624619
ENSMUSG00000027610	Gss	glutathione synthetase	1705.75	1027.22	1.65991	0.731102	0.0659495	0.625295
ENSMUSG00000035067	Xkr6	X-linked Kx blood group related 6	96.0282	54.7506	1.7404	0.799418	0.0660588	0.625751
ENSMUSG00000022821	Hgd	homogentisate 1, 2-dioxygenase	1501.78	897.896	1.6718	0.741406	0.0663637	0.626894
ENSMUSG00000078532	Nkain1	Na+/K+ transporting ATPase interacting 1	120.67	66.3291	1.80709	0.853671	0.066285	0.626894
ENSMUSG00000050708	Ftl1	ferritin light polypeptide 1	5519.79	3564.82	1.54825	0.630639	0.0663438	0.626894
ENSMUSG00000030688	Stard10	START domain containing 10	2796	1674.42	1.66943	0.73936	0.0663098	0.626894
ENSMUSG00000076897	Traj32	T cell receptor alpha joining 32	4.74012	0	5.74012	2.52108	0.0664298	0.627229
ENSMUSG00000038286	Bphl	biphenyl hydrolase-like (serine hydrolase, breast epithelial mucin-associated antigen)	952.179	576.546	1.6504	0.722812	0.0664675	0.627295
ENSMUSG00000027984	Hadh	hydroxyacyl-Coenzyme A dehydrogenase	3291.01	2043.66	1.61005	0.687109	0.0666413	0.628284
ENSMUSG00000025198	Erlin1	ER lipid raft associated 1	627.281	386.944	1.61952	0.695564	0.0667015	0.628342
ENSMUSG00000068303	Spr-ps1	sepiapterin reductase pseudogene 1	15.5125	4.12315	3.22312	1.68846	0.0667608	0.628611
ENSMUSG00000037542	Aldh8a1	aldehyde dehydrogenase 8 family, member A1	3987.79	2104.32	1.89463	0.921913	0.0670686	0.629816
ENSMUSG00000022150	Dab2	disabled 2, mitogen-responsive phosphoprotein	5874.48	3736.14	1.57218	0.65277	0.0670383	0.629816
ENSMUSG00000026175	Vil1	villin 1	1845.7	960.479	1.92068	0.941619	0.0671681	0.630411
ENSMUSG00000039315	Clnk	cytokine-dependent hematopoietic cell linker	64.9437	24.1128	2.6259	1.39281	0.0674227	0.63164
ENSMUSG00000030562	Nox4	NADPH oxidase 4	2349.81	1280.19	1.83487	0.875675	0.0674009	0.63164
ENSMUSG00000037972	Snn	stannin	729.154	476.822	1.52809	0.611729	0.0677631	0.632332
ENSMUSG00000024670	Cd6	CD6 antigen	131.852	24.7873	5.15183	2.36508	0.067821	0.632332
ENSMUSG00000075014	Gm10800	predicted gene 10800	21.052	1.65894	8.29356	3.05199	0.0677627	0.632332
ENSMUSG00000026358	Rgs1	regulator of G-protein signaling 1	1130.37	547.125	2.06407	1.04549	0.0681473	0.632467
ENSMUSG00000062014	Gmfb	glia maturation factor, beta	912.025	623.456	1.46211	0.548054	0.0681172	0.632467
ENSMUSG00000049653	Spatc1	spermatogenesis and centriole associated 1	11.4347	2.3374	3.72588	1.89758	0.0680346	0.632467
ENSMUSG00000028071	Sh2d2a	SH2 domain containing 2A	597.381	116.608	5.08793	2.34708	0.0681805	0.632467
ENSMUSG00000090061	Nwd2	NACHT and WD repeat domain containing 2	29.8589	12.5883	2.271	1.18333	0.0683677	0.632529
ENSMUSG00000045031	Cetn4	centrin 4	16.3574	4.6857	3.05282	1.61014	0.0685406	0.632544
ENSMUSG00000076906	Traj23	T cell receptor alpha joining 23	7.37049	0.887422	4.43488	2.1489	0.0688506	0.63368
ENSMUSG00000000791	Il12rb1	interleukin 12 receptor, beta 1	36.4015	6.99731	4.67676	2.22551	0.0689611	0.634411
ENSMUSG00000033216	Eefsec	eukaryotic elongation factor, selenocysteine-tRNA-specific	334.215	214.469	1.55574	0.637605	0.0690163	0.634633
ENSMUSG00000039470	Zdhhc2	zinc finger, DHHC domain containing 2	51.16	28.0132	1.7978	0.846233	0.0690486	0.634644
ENSMUSG00000017801	Mlx	MAX-like protein X	436.463	290.199	1.50228	0.587157	0.0692685	0.636092
ENSMUSG00000076752	Tcrg-C2	T-cell receptor gamma, constant 2	15.6822	0.331787	12.5262	3.64687	0.0692456	0.636092
ENSMUSG00000026573	Xcl1	chemokine (C motif) ligand 1	99.4101	17.4967	5.42854	2.44056	0.0693501	0.636468
ENSMUSG00000058952	Cfi	complement component factor i	58.664	26.6534	2.15756	1.1094	0.0693717	0.636468
ENSMUSG00000025586	Cpeb1	cytoplasmic polyadenylation element binding protein 1	82.4437	41.889	1.94557	0.960196	0.0694294	0.636712
ENSMUSG00000076912	Traj17	T cell receptor alpha joining 17	15.6788	0.331787	12.5236	3.64658	0.0698048	0.637578
ENSMUSG00000027339	Rassf2	Ras association (RalGDS/AF-6) domain family member 2	722.221	371.545	1.9413	0.957023	0.0696221	0.637578
ENSMUSG00000070044	Fam149a	family with sequence similarity 149, member A	856.399	583.739	1.46629	0.552174	0.0697543	0.637578
ENSMUSG00000031700	Gpt2	glutamic pyruvate transaminase (alanine aminotransferase) 2	661.872	313.62	2.1069	1.07512	0.0696473	0.637578
ENSMUSG00000082286	Pisd-ps1	phosphatidylserine decarboxylase, pseudogene 1	310.948	201.678	1.53913	0.622115	0.0699366	0.637926
ENSMUSG00000078122	F630028O10Rik	RIKEN cDNA F630028O10 gene	63.9489	19.1121	3.22935	1.69124	0.0699079	0.637926
ENSMUSG00000037157	Il22ra1	interleukin 22 receptor, alpha 1	61.8008	27.6913	2.18885	1.13017	0.0700315	0.638506
ENSMUSG00000029821	Dfna5	deafness, autosomal dominant 5 (human)	286.075	187.073	1.5264	0.610132	0.0701242	0.639066
ENSMUSG00000026187	Xrcc5	X-ray repair complementing defective repair in Chinese hamster cells 5	531.194	349.253	1.51946	0.603556	0.0706073	0.641197
ENSMUSG00000007034	Slc44a4	solute carrier family 44, member 4	565.852	374.914	1.50793	0.592569	0.0706518	0.641197
ENSMUSG00000049493	Pls1	plastin 1 (I-isoform)	551.339	281.262	1.95683	0.968521	0.070672	0.641197
ENSMUSG00000023571	Fam132a	family with sequence similarity 132, member A	285.658	171.904	1.65791	0.729362	0.0708763	0.64248
ENSMUSG00000022853	Ehhadh	enoyl-Coenzyme A, hydratase/3-hydroxyacyl Coenzyme A dehydrogenase	3475.73	2088.57	1.66385	0.734526	0.0711255	0.643882
ENSMUSG00000037386	Rims2	regulating synaptic membrane exocytosis 2	163.892	100.68	1.62168	0.697489	0.0712039	0.643948
ENSMUSG00000059586	Nsmce2	NSE2/MMS21 homolog, SMC5-SMC6 complex SUMO ligase	221.11	134.184	1.64303	0.716356	0.071259	0.643948
ENSMUSG00000022560	Slc52a2	solute carrier protein 52, member 2	216.661	131.426	1.64364	0.716897	0.0712423	0.643948
ENSMUSG00000015451	C4a	complement component 4A (Rodgers blood group)	88.95	41.4294	2.11999	1.08406	0.0713402	0.644112
ENSMUSG00000024677	Ms4a6b	membrane-spanning 4-domains, subfamily A, member 6B	296.713	86.8599	3.3885	1.76065	0.0714427	0.644752
ENSMUSG00000034341	Wbp2	WW domain binding protein 2	2005.76	1394.18	1.43835	0.524414	0.0716451	0.645153
ENSMUSG00000043391	2510009E07Rik	RIKEN cDNA 2510009E07 gene	508.755	343.879	1.47807	0.563715	0.0716009	0.645153
ENSMUSG00000049091	Sephs2	selenophosphate synthetase 2	2446.48	1352.72	1.80797	0.854371	0.0716375	0.645153
ENSMUSG00000026070	Il18r1	interleukin 18 receptor 1	478.494	102.738	4.62216	2.20857	0.0717767	0.645951
ENSMUSG00000028691	Prdx1	peroxiredoxin 1	2061.38	1421.79	1.44954	0.535592	0.0719636	0.645951
ENSMUSG00000026914	Psmd14	proteasome (prosome, macropain) 26S subunit, non-ATPase, 14	305.321	191.856	1.58834	0.667522	0.072202	0.64703
ENSMUSG00000021456	Fbp2	fructose bisphosphatase 2	162.821	78.1339	2.07017	1.04975	0.0723043	0.647508
ENSMUSG00000017688	Hnf4g	hepatocyte nuclear factor 4, gamma	184.402	65.4038	2.79204	1.48132	0.0723187	0.647508
ENSMUSG00000028243	Ubxn2b	UBX domain protein 2B	355.865	238.964	1.48716	0.572562	0.0724659	0.648205
ENSMUSG00000048371	Pdp2	pyruvate dehyrogenase phosphatase catalytic subunit 2	1352.39	732.725	1.84455	0.883269	0.0724551	0.648205
ENSMUSG00000021218	Gdi2	guanosine diphosphate (GDP) dissociation inhibitor 2	4074.57	2821.94	1.44373	0.529805	0.0725634	0.648512
ENSMUSG00000063796	Slc22a8	solute carrier family 22 (organic anion transporter), member 8	3360.7	2022.25	1.66153	0.732516	0.072851	0.649143
ENSMUSG00000061838	Suclg2	succinate-Coenzyme A ligase, GDP-forming, beta subunit	1284.54	889.702	1.44329	0.529357	0.0730799	0.650421
ENSMUSG00000026202	Tuba4a	tubulin, alpha 4A	808.347	545.533	1.48087	0.566449	0.0732124	0.650944
ENSMUSG00000030878	Cdr2	cerebellar degeneration-related 2	1410.64	893.44	1.57824	0.658318	0.0732736	0.650986
ENSMUSG00000093402	Gm18588	predicted gene, 18588	448.886	306.862	1.46132	0.547272	0.0734897	0.65199
ENSMUSG00000032418	Me1	malic enzyme 1, NADP(+)-dependent, cytosolic	1481.85	728.792	2.03188	1.02282	0.0735248	0.652017
ENSMUSG00000000673	Haao	3-hydroxyanthranilate 3,4-dioxygenase	770.063	424.903	1.81042	0.856324	0.0736219	0.652312
ENSMUSG00000047638	Nr1h4	nuclear receptor subfamily 1, group H, member 4	1378.31	849.573	1.62163	0.697443	0.0739475	0.653925
ENSMUSG00000048164	Gm7204	predicted pseudogene 7204	1183.91	798.217	1.48259	0.568123	0.0739222	0.653925
ENSMUSG00000021023	1110008L16Rik	RIKEN cDNA 1110008L16 gene	156.5	96.0276	1.62325	0.698885	0.0740059	0.654013
ENSMUSG00000003809	Gcdh	glutaryl-Coenzyme A dehydrogenase	2243.76	1391.86	1.61162	0.68851	0.0741982	0.654579
ENSMUSG00000023019	Gpd1	glycerol-3-phosphate dehydrogenase 1 (soluble)	2563.39	1415.64	1.81019	0.856143	0.0747	0.654741
ENSMUSG00000024600	Slc27a6	solute carrier family 27 (fatty acid transporter), member 6	36.996	5.11453	6.21406	2.63554	0.0745894	0.654741
ENSMUSG00000039131	Gipc2	GIPC PDZ domain containing family, member 2	987.166	558.324	1.76671	0.821068	0.0747562	0.654741
ENSMUSG00000039105	Atp6v1g1	ATPase, H+ transporting, lysosomal V1 subunit G1	463.444	317.558	1.45796	0.54395	0.0743168	0.654741
ENSMUSG00000028572	Hook1	hook microtubule tethering protein 1	1407.22	980.342	1.435	0.521049	0.0746204	0.654741
ENSMUSG00000029915	Clec5a	C-type lectin domain family 5, member a	88.3979	47.137	1.85715	0.893094	0.0747333	0.654741
ENSMUSG00000060181	Slc35e3	solute carrier family 35, member E3	274.793	173.249	1.58275	0.662433	0.0749094	0.654862
ENSMUSG00000031533	Mrps31	mitochondrial ribosomal protein S31	316.432	207.055	1.52571	0.609479	0.0749357	0.654862
ENSMUSG00000082456	Gm11598	predicted gene 11598	22.9292	8.23545	2.59102	1.37352	0.0749798	0.654967
ENSMUSG00000003882	Il7r	interleukin 7 receptor	519.257	97.1807	5.29897	2.40571	0.0752068	0.655321
ENSMUSG00000030759	Far1	fatty acyl CoA reductase 1	1860.1	1230.12	1.51171	0.596182	0.0751726	0.655321
ENSMUSG00000051147	Nat2	N-acetyltransferase 2 (arylamine N-acetyltransferase)	99.9695	50.7089	1.95265	0.965433	0.0752036	0.655321
ENSMUSG00000080665	Mir1199	microRNA 1199	14.2221	3.36547	3.48694	1.80196	0.0752128	0.655321
ENSMUSG00000036775	Decr2	2-4-dienoyl-Coenzyme A reductase 2, peroxisomal	362.876	240.863	1.50447	0.589256	0.0754764	0.656497
ENSMUSG00000002297	Dbf4	DBF4 zinc finger	109.846	63.0452	1.73074	0.791393	0.0754667	0.656497
ENSMUSG00000045314	Sowahb	sosondowah ankyrin repeat domain family member B	287.859	180.408	1.59232	0.671127	0.0755571	0.656828
ENSMUSG00000006538	Ihh	Indian hedgehog	128.133	45.9865	2.7483	1.45854	0.0757082	0.657486
ENSMUSG00000027070	Lrp2	low density lipoprotein receptor-related protein 2	67611.1	36109.8	1.87235	0.90485	0.0757833	0.657486
ENSMUSG00000040472	Rabggta	Rab geranylgeranyl transferase, a subunit	455.07	299.369	1.51837	0.60252	0.0761142	0.657535
ENSMUSG00000022237	Ankrd33b	ankyrin repeat domain 33B	1292.13	846.405	1.52599	0.609745	0.0761431	0.657535
ENSMUSG00000038128	Camk4	calcium/calmodulin-dependent protein kinase IV	102.171	53.3817	1.89717	0.923847	0.0758905	0.657535
ENSMUSG00000028136	Snx27	sorting nexin family member 27	1058.98	724.16	1.46172	0.547668	0.0759591	0.657535
ENSMUSG00000028460	Sit1	suppression inducing transmembrane adaptor 1	14.8461	1.65894	5.95957	2.57521	0.0760437	0.657535
ENSMUSG00000029373	Pf4	platelet factor 4	50.934	18.7033	2.63579	1.39824	0.0759958	0.657535
ENSMUSG00000032105	Pdzd3	PDZ domain containing 3	762.428	412.294	1.84718	0.885323	0.0760347	0.657535
ENSMUSG00000032299	Commd4	COMM domain containing 4	260.124	169.926	1.5277	0.61136	0.0761167	0.657535
ENSMUSG00000002204	Napsa	napsin A aspartic peptidase	2027.05	1121.02	1.8075	0.853998	0.0763256	0.658276
ENSMUSG00000024228	Nudt12	nudix (nucleoside diphosphate linked moiety X)-type motif 12	650	397.779	1.63248	0.707067	0.0765908	0.659727
ENSMUSG00000030056	Isy1	ISY1 splicing factor homolog	399.829	259.909	1.53628	0.619438	0.0768283	0.661216
ENSMUSG00000040560	Wdr7	WD repeat domain 7	1023.38	680.676	1.50274	0.587599	0.0768789	0.661372
ENSMUSG00000032459	Mrps22	mitochondrial ribosomal protein S22	345.045	235.825	1.46118	0.547137	0.077568	0.665827
ENSMUSG00000010601	Apol7a	apolipoprotein L 7a	4.91177	0	5.91177	2.56359	0.0777469	0.666359
ENSMUSG00000027615	Hps3	Hermansky-Pudlak syndrome 3	578.702	393.126	1.47085	0.556654	0.0777523	0.666359
ENSMUSG00000063931	Pepd	peptidase D	2313.8	1450.88	1.59435	0.672967	0.07784	0.666552
ENSMUSG00000029679	Hyal6	hyaluronoglucosaminidase 6	4.58726	0	5.58726	2.48214	0.077957	0.667274
ENSMUSG00000081429	Rps27-ps1	ribosomal protein S27, pseudogene 1	4.86635	0	5.86635	2.55246	0.0780445	0.667743
ENSMUSG00000019989	Enpp3	ectonucleotide pyrophosphatase/phosphodiesterase 3	440.929	220.181	1.99804	0.998583	0.0781664	0.668506
ENSMUSG00000024588	Fech	ferrochelatase	1399.23	952.911	1.46788	0.553735	0.0782744	0.66915
ENSMUSG00000031517	Gpm6a	glycoprotein m6a	350.332	219.996	1.58977	0.668816	0.0784015	0.669395
ENSMUSG00000091742	Gm5093	predicted gene 5093	6.87751	0.887422	4.17369	2.06132	0.0784959	0.669856
ENSMUSG00000040658	Dnph1	2'-deoxynucleoside 5'-phosphate N-hydrolase 1	99.5084	43.0182	2.28334	1.19114	0.0787285	0.669856
ENSMUSG00000053799	Exoc6	exocyst complex component 6	1202.49	836.843	1.43641	0.522471	0.0787834	0.669856
ENSMUSG00000028378	Ptgr1	prostaglandin reductase 1	59.4963	30.6309	1.91257	0.935514	0.0787386	0.669856
ENSMUSG00000064267	Hvcn1	hydrogen voltage-gated channel 1	157.199	94.8649	1.65023	0.722669	0.0786454	0.669856
ENSMUSG00000082308	Gm15770	predicted gene 15770	91.4954	54.2071	1.67543	0.744528	0.0787611	0.669856
ENSMUSG00000029634	Rnf6	ring finger protein (C3H2C3 type) 6	1784.73	1246.13	1.43187	0.517898	0.0785649	0.669856
ENSMUSG00000044876	Zfp444	zinc finger protein 444	446.809	299.709	1.48918	0.574516	0.0787778	0.669856
ENSMUSG00000063683	Glyat	glycine-N-acyltransferase	3221.03	1561.37	2.06227	1.04423	0.0788453	0.670021
ENSMUSG00000029918	Mrps33	mitochondrial ribosomal protein S33	46.4975	22.2835	2.03997	1.02855	0.0790419	0.67099
ENSMUSG00000019996	Map7	microtubule-associated protein 7	2835.9	1728.35	1.64044	0.714082	0.0792158	0.671413
ENSMUSG00000025155	Dus1l	dihydrouridine synthase 1-like (S. cerevisiae)	468.348	308.791	1.51505	0.599362	0.079723	0.671413
ENSMUSG00000022750	Klhl22	kelch-like 22	353.901	243.091	1.45397	0.539994	0.0797505	0.671413
ENSMUSG00000041079	Rwdd2b	RWD domain containing 2B	205.775	131.384	1.56194	0.643337	0.0796764	0.671413
ENSMUSG00000079037	Prnp	prion protein	675.457	453.038	1.48987	0.575184	0.0796081	0.671413
ENSMUSG00000028967	Errfi1	ERBB receptor feedback inhibitor 1	6713.05	3958.83	1.69554	0.761746	0.0795044	0.671413
ENSMUSG00000039633	Lonrf1	LON peptidase N-terminal domain and ring finger 1	251.788	146.186	1.71748	0.780291	0.0797228	0.671413
ENSMUSG00000031820	Babam1	BRISC and BRCA1 A complex member 1	889.745	604.84	1.47026	0.556075	0.0794134	0.671413
ENSMUSG00000032047	Acat1	acetyl-Coenzyme A acetyltransferase 1	4652.03	3243.92	1.43394	0.519988	0.0794456	0.671413
ENSMUSG00000039988	Ankrd13c	ankyrin repeat domain 13c	2635.14	1734.22	1.5192	0.603313	0.0798464	0.671901
ENSMUSG00000001901	Kcnh6	potassium voltage-gated channel, subfamily H (eag-related), member 6	17.8805	6.11785	2.65256	1.40738	0.0800562	0.671999
ENSMUSG00000028266	Lmo4	LIM domain only 4	568.432	382.481	1.4849	0.570368	0.0800884	0.671999
ENSMUSG00000070291	Ddx43	DEAD (Asp-Glu-Ala-Asp) box polypeptide 43	21.1004	2.69792	5.97644	2.57929	0.0800806	0.671999
ENSMUSG00000078695	Cisd3	CDGSH iron sulfur domain 3	160.069	101.99	1.56393	0.645177	0.080236	0.672685
ENSMUSG00000033972	Zfp944	zinc finger protein 944	130.133	79.7223	1.62449	0.699989	0.0803725	0.673
ENSMUSG00000026009	Icos	inducible T cell co-stimulator	259.009	56.2735	4.53978	2.18262	0.0810702	0.676602
ENSMUSG00000041920	Slc16a6	solute carrier family 16 (monocarboxylic acid transporters), member 6	230.799	119.321	1.92651	0.945989	0.0813131	0.677266
ENSMUSG00000039616	Mocos	molybdenum cofactor sulfurase	106.931	63.5142	1.67298	0.742419	0.0813818	0.677563
ENSMUSG00000073427	Gm4924	predicted gene 4924	19.7766	7.1172	2.55958	1.3559	0.0815064	0.678055
ENSMUSG00000000581	C1d	C1D nuclear receptor co-repressor	245.692	164.249	1.49285	0.578068	0.0815469	0.678098
ENSMUSG00000040978	Gm11992	predicted gene 11992	185.54	105.636	1.74932	0.806791	0.0817283	0.678099
ENSMUSG00000054003	Tdrd9	tudor domain containing 9	14.1627	2.83165	3.95723	1.98449	0.0818114	0.678099
ENSMUSG00000091695	Gm17669	predicted gene, 17669	36.0634	16.231	2.15097	1.10499	0.0817772	0.678099
ENSMUSG00000034438	Gbp8	guanylate-binding protein 8	114.003	38.8721	2.88431	1.52823	0.0816719	0.678099
ENSMUSG00000068587	Mgam	maltase-glucoamylase	878.389	512.524	1.71246	0.776069	0.081806	0.678099
ENSMUSG00000034755	Pcdh11x	protocadherin 11 X-linked	7.59063	0.887422	4.55152	2.18635	0.0818114	0.678099
ENSMUSG00000039824	Myl6b	myosin, light polypeptide 6B	93.1975	55.3658	1.67118	0.740869	0.0821427	0.680461
ENSMUSG00000027883	Gpsm2	G-protein signalling modulator 2 (AGS3-like, C. elegans)	90.7277	53.6088	1.67972	0.748224	0.0822714	0.68053
ENSMUSG00000019861	Gopc	golgi associated PDZ and coiled-coil motif containing	870.922	585.38	1.48696	0.572363	0.0824098	0.681264
ENSMUSG00000029275	Gfi1	growth factor independent 1	47.3461	8.34228	5.17497	2.37155	0.0824606	0.681264
ENSMUSG00000071253	Slc25a16	solute carrier family 25 (mitochondrial carrier, Graves disease autoantigen), member 16	857.768	589.203	1.45504	0.541059	0.082729	0.681406
ENSMUSG00000018509	Cenpv	centromere protein V	124.628	76.5431	1.62011	0.696088	0.0827404	0.681406
ENSMUSG00000024132	Eci1	enoyl-Coenzyme A delta isomerase 1	560.139	377.315	1.48326	0.568768	0.0829111	0.681406
ENSMUSG00000033107	Rnf125	ring finger protein 125	200.814	62.9293	3.15684	1.65848	0.0828423	0.681406
ENSMUSG00000027863	Cd2	CD2 antigen	363.181	78.1252	4.60259	2.20244	0.0828509	0.681406
ENSMUSG00000037348	Paqr7	progestin and adipoQ receptor family member VII	401.65	279.294	1.43653	0.522584	0.0828284	0.681406
ENSMUSG00000086784	Isoc2a	isochorismatase domain containing 2a	997.193	549.722	1.81252	0.857995	0.08278	0.681406
ENSMUSG00000037742	Eef1a1	eukaryotic translation elongation factor 1 alpha 1	11441.6	7999.06	1.43031	0.516329	0.0828984	0.681406
ENSMUSG00000005804	Bloc1s6	biogenesis of lysosomal organelles complex-1, subunit 6, pallidin	285.665	190.489	1.49703	0.582103	0.0830072	0.681701
ENSMUSG00000031530	Dusp4	dual specificity phosphatase 4	267.756	172.137	1.55227	0.634382	0.0832022	0.682974
ENSMUSG00000032011	Thy1	thymus cell antigen 1, theta	404.785	75.0798	5.33367	2.41513	0.0834594	0.683437
ENSMUSG00000040247	Tbc1d10c	TBC1 domain family, member 10c	173.9	38.6551	4.41053	2.14095	0.0835101	0.683578
ENSMUSG00000039197	Adk	adenosine kinase	822.73	501.1	1.64057	0.714197	0.083553	0.683655
ENSMUSG00000028536	2610528J11Rik	RIKEN cDNA 2610528J11 gene	184.472	117.378	1.56677	0.647794	0.0836356	0.684057
ENSMUSG00000024646	Cyb5a	cytochrome b5 type A (microsomal)	4920.4	2851.81	1.72511	0.786685	0.083725	0.684514
ENSMUSG00000084854	Gm12678	predicted gene 12678	164.384	74.8843	2.17943	1.12395	0.0837891	0.684764
ENSMUSG00000024070	Prkd3	protein kinase D3	1327.89	908.675	1.46084	0.546796	0.0838311	0.684833
ENSMUSG00000091255	Speer4e	spermatogenesis associated glutamate (E)-rich protein 4e	12.5449	0.663575	8.14202	3.02539	0.0840311	0.685918
ENSMUSG00000048787	Dcun1d3	DCN1, defective in cullin neddylation 1, domain containing 3 (S. cerevisiae)	419.236	276.496	1.51438	0.598732	0.0840804	0.686046
ENSMUSG00000068220	Lgals1	lectin, galactose binding, soluble 1	318.815	214.29	1.48551	0.570954	0.0841373	0.686193
ENSMUSG00000051671	Coa6	cytochrome c oxidase assembly factor 6	256.243	150.76	1.69507	0.761344	0.0843764	0.686815
ENSMUSG00000029066	Mrpl20	mitochondrial ribosomal protein L20	312.382	201.08	1.55078	0.632998	0.0844395	0.686966
ENSMUSG00000026739	Bmi1	Bmi1 polycomb ring finger oncogene	600.288	408.575	1.46808	0.553928	0.0849082	0.689769
ENSMUSG00000000805	Car4	carbonic anhydrase 4	1751.04	1180.24	1.48322	0.568731	0.0850828	0.690431
ENSMUSG00000001663	Gstt1	glutathione S-transferase, theta 1	507.557	339.961	1.49154	0.576801	0.0851919	0.69052
ENSMUSG00000060096	Amd-ps3	S-adenosylmethionine decarboxylase, pseudogene 3	52.6475	25.6083	2.0162	1.01164	0.0855145	0.690847
ENSMUSG00000022451	Twf1	twinfilin actin binding protein 1	962.978	658.566	1.46154	0.547485	0.0859199	0.691782
ENSMUSG00000042345	Ubash3a	ubiquitin associated and SH3 domain containing, A	100.878	11.7949	7.96237	2.9932	0.0861962	0.691782
ENSMUSG00000046805	Mpeg1	macrophage expressed gene 1	2137.72	1212.84	1.76195	0.817174	0.0858477	0.691782
ENSMUSG00000079604	Gm13219	predicted gene 13219	4.61281	0	5.61281	2.48872	0.0859509	0.691782
ENSMUSG00000041058	Wwp1	WW domain containing E3 ubiquitin protein ligase 1	2869.83	2012.31	1.42592	0.511895	0.0863754	0.691782
ENSMUSG00000076492	Trbj2-1	T cell receptor beta joining 2-1	4.3525	0	5.3525	2.42021	0.0861241	0.691782
ENSMUSG00000022322	Shcbp1	Shc SH2-domain binding protein 1	16.9289	4.60251	3.20016	1.67815	0.08615	0.691782
ENSMUSG00000031362	Xlr4c	X-linked lymphocyte-regulated 4C	5.77229	0.331787	5.08511	2.34628	0.0863141	0.691782
ENSMUSG00000020553	Pctp	phosphatidylcholine transfer protein	289.129	194.327	1.48535	0.570806	0.0867488	0.693085
ENSMUSG00000037710	Cisd1	CDGSH iron sulfur domain 1	1284.15	901.875	1.4234	0.509343	0.0868446	0.693094
ENSMUSG00000076889	Traj41	T cell receptor alpha joining 41	5.88082	0	6.88082	2.78258	0.087015	0.693626
ENSMUSG00000087260	Lamtor5	late endosomal/lysosomal adaptor, MAPK and MTOR activator 5	342.567	233.709	1.4638	0.54972	0.0870811	0.693626
ENSMUSG00000039899	Fgl2	fibrinogen-like protein 2	759.262	296.413	2.55625	1.35403	0.0872799	0.693908
ENSMUSG00000076540	Igkv4-80	immunoglobulin kappa variable 4-80	6.46793	0	7.46793	2.90071	0.0872864	0.693908
ENSMUSG00000024669	Cd5	CD5 antigen	131.736	24.5319	5.19882	2.37818	0.0874462	0.694098
ENSMUSG00000052520	Cyp2j5	cytochrome P450, family 2, subfamily j, polypeptide 5	10102.1	6908.14	1.46228	0.548216	0.0874459	0.694098
ENSMUSG00000011831	Evi5	ecotropic viral integration site 5	2100.77	1428.05	1.47075	0.55655	0.0876651	0.694827
ENSMUSG00000040170	Fmo2	flavin containing monooxygenase 2	3628.56	2126.34	1.70615	0.770745	0.0879535	0.695332
ENSMUSG00000010362	Rdm1	RAD52 motif 1	115.982	67.7837	1.70072	0.766143	0.0880783	0.695332
ENSMUSG00000075033	Nxpe3	neurexophilin and PC-esterase domain family, member 3	225.787	152.015	1.48212	0.567661	0.0878937	0.695332
ENSMUSG00000068134	Zfp120	zinc finger protein 120	172.522	110.404	1.55759	0.639315	0.0878782	0.695332
ENSMUSG00000035936	Aldh5a1	aldhehyde dehydrogenase family 5, subfamily A1	511.884	350.01	1.46117	0.547123	0.088293	0.695951
ENSMUSG00000000817	Fasl	Fas ligand (TNF superfamily, member 6)	208.448	33.3345	6.10022	2.60886	0.0888939	0.697203
ENSMUSG00000021591	Glrx	glutaredoxin	156.169	104.959	1.4833	0.568809	0.0888316	0.697203
ENSMUSG00000086688	Gm11560	predicted gene 11560	1410.81	997.36	1.41413	0.499918	0.0892612	0.698728
ENSMUSG00000026659	Dusp12	dual specificity phosphatase 12	60.8684	33.6943	1.78324	0.834503	0.0893765	0.699173
ENSMUSG00000074506	Gm10705	predicted gene 10705	162.112	105.31	1.53431	0.617593	0.0893865	0.699173
ENSMUSG00000053044	Cd8b1	CD8 antigen, beta chain 1	91.7015	14.1887	6.10332	2.6096	0.0894417	0.699337
ENSMUSG00000061852	Gm7582	predicted gene 7582	4.37467	0	5.37467	2.42618	0.08956	0.699994
ENSMUSG00000034947	Tmem106a	transmembrane protein 106A	839.554	593.937	1.41285	0.498605	0.090216	0.702336
ENSMUSG00000032308	Ulk3	unc-51-like kinase 3	169.277	105.914	1.59265	0.671432	0.0901957	0.702336
ENSMUSG00000053898	Ech1	enoyl coenzyme A hydratase 1, peroxisomal	1669.21	1132.42	1.4736	0.55935	0.0903565	0.70299
ENSMUSG00000038528	Mfsd4b5	major facilitator superfamily domain containing 4B5	2573.83	1696.88	1.51649	0.60074	0.0905033	0.703329
ENSMUSG00000034028	Cd226	CD226 antigen	181.587	33.9654	5.22194	2.38459	0.0905432	0.703371
ENSMUSG00000025792	Slc25a10	solute carrier family 25 (mitochondrial carrier, dicarboxylate transporter), member 10	2557.03	1539.94	1.66004	0.73122	0.0906588	0.704002
ENSMUSG00000048022	Tmem229a	transmembrane protein 229A	1767.69	1240.09	1.42511	0.511076	0.0906997	0.704029
ENSMUSG00000030669	Calca	calcitonin/calcitonin-related polypeptide, alpha	186.794	42.1148	4.35568	2.1229	0.0908607	0.704029
ENSMUSG00000035202	Lars2	leucyl-tRNA synthetase, mitochondrial	10399.3	7214.85	1.44132	0.527386	0.0910226	0.704029
ENSMUSG00000068014	Gm14648	predicted gene 14648	13.929	3.54172	3.28707	1.7168	0.0909104	0.704029
ENSMUSG00000028706	Nsun4	NOL1/NOP2/Sun domain family, member 4	94.6621	55.4222	1.69547	0.761684	0.091232	0.704169
ENSMUSG00000029462	Vps29	VPS29 retromer complex component	776.328	544.615	1.42468	0.51064	0.0913811	0.705053
ENSMUSG00000022679	Mpv17l	Mpv17 transgene, kidney disease mutant-like	1054.79	658.823	1.60011	0.678173	0.0914713	0.705483
ENSMUSG00000047388	Atmin	ATM interactor	428.489	295.04	1.45078	0.536831	0.0915873	0.706111
ENSMUSG00000084289	Gm6977	predicted gene 6977	279.248	188.168	1.48148	0.567038	0.0916256	0.70614
ENSMUSG00000088119	Gm24060	predicted gene, 24060	15.8827	4.1697	3.2657	1.70739	0.0916679	0.706199
ENSMUSG00000084866	A930006K02Rik	RIKEN cDNA A930006K02 gene	29.4374	6.413	4.10595	2.03772	0.091886	0.707079
ENSMUSG00000028247	Coq3	coenzyme Q3 methyltransferase	161.049	100.702	1.59338	0.672092	0.0918604	0.707079
ENSMUSG00000066839	Ecsit	ECSIT signalling integrator	465.799	311.671	1.49294	0.578156	0.0919665	0.707432
ENSMUSG00000003559	As3mt	arsenic (+3 oxidation state) methyltransferase	390.931	246.662	1.58253	0.662231	0.0920344	0.707688
ENSMUSG00000051663	Pcdhb1	protocadherin beta 1	7.34047	0.887422	4.41898	2.14371	0.0921625	0.707729
ENSMUSG00000072621	Slfn10-ps	schlafen 10, pseudogene	76.9891	22.1182	3.37349	1.75424	0.0925033	0.708625
ENSMUSG00000069302	Hist1h2ah	histone cluster 1, H2ah	8.92623	1.02807	4.89441	2.29114	0.0926017	0.708848
ENSMUSG00000012187	Mogat1	monoacylglycerol O-acyltransferase 1	338.982	234.142	1.44586	0.531926	0.0926763	0.709153
ENSMUSG00000022106	Rcbtb2	regulator of chromosome condensation (RCC1) and BTB (POZ) domain containing protein 2	514.082	257.472	1.99279	0.994793	0.0929419	0.710386
ENSMUSG00000057497	Fam136a	family with sequence similarity 136, member A	270.375	173.944	1.55121	0.633391	0.0929241	0.710386
ENSMUSG00000076915	Traj14	T cell receptor alpha joining 14	6.84988	0	7.84988	2.97267	0.0932322	0.711696
ENSMUSG00000024039	Cbs	cystathionine beta-synthase	1944.87	1083.36	1.79448	0.843569	0.0932875	0.711696
ENSMUSG00000019874	Fabp7	fatty acid binding protein 7, brain	61.1481	35.4038	1.70719	0.771623	0.0934431	0.712085
ENSMUSG00000062309	Rpp25	ribonuclease P/MRP 25 subunit	6.0313	0.342692	5.23672	2.38866	0.0934411	0.712085
ENSMUSG00000021947	Cryl1	crystallin, lambda 1	1230.88	771.997	1.59364	0.672326	0.0935487	0.712358
ENSMUSG00000034729	Mrps10	mitochondrial ribosomal protein S10	162.537	101.775	1.59122	0.670132	0.093672	0.712766
ENSMUSG00000029136	Rbks	ribokinase	103.346	61.9116	1.65862	0.729983	0.0937551	0.713092
ENSMUSG00000092607	Scnm1	sodium channel modifier 1	243.571	164.697	1.47602	0.561709	0.0939933	0.714146
ENSMUSG00000058799	Nap1l1	nucleosome assembly protein 1-like 1	701.466	487.196	1.4389	0.524968	0.0942972	0.714732
ENSMUSG00000020228	Helb	helicase (DNA) B	490.692	339.191	1.44534	0.531408	0.0943962	0.714732
ENSMUSG00000055737	Ghr	growth hormone receptor	3973.32	2728.58	1.45602	0.542027	0.0941927	0.714732
ENSMUSG00000062410	Hsd3b3	hydroxy-delta-5-steroid dehydrogenase, 3 beta- and steroid delta-isomerase 3	487.115	224.651	2.16314	1.11313	0.0943268	0.714732
ENSMUSG00000028292	Rars2	arginyl-tRNA synthetase 2, mitochondrial	404.474	262.799	1.53706	0.620171	0.0944659	0.714732
ENSMUSG00000057425	Ugt2b37	UDP glucuronosyltransferase 2 family, polypeptide B37	295.754	149.89	1.96669	0.975766	0.0944174	0.714732
ENSMUSG00000083626	Gm4459	predicted gene 4459	386.338	269.744	1.43064	0.516665	0.0945075	0.714732
ENSMUSG00000036781	Rps27l	ribosomal protein S27-like	304.415	200.435	1.51619	0.600455	0.0945253	0.714732
ENSMUSG00000022236	Ropn1l	ropporin 1-like	34.2409	15.6209	2.12028	1.08425	0.0947147	0.715147
ENSMUSG00000083512	Gm12749	predicted gene 12749	111.354	68.0243	1.62774	0.702873	0.0946778	0.715147
ENSMUSG00000031129	Slc9a9	solute carrier family 9 (sodium/hydrogen exchanger), member 9	455.405	185.457	2.44777	1.29147	0.0947203	0.715147
ENSMUSG00000025997	Ikzf2	IKAROS family zinc finger 2	250.753	156.73	1.5961	0.674555	0.0948932	0.715659
ENSMUSG00000062588	Gm6104	predicted gene 6104	155.646	101.621	1.52646	0.610186	0.0949738	0.715747
ENSMUSG00000018012	Rac3	RAS-related C3 botulinum substrate 3	56.5959	30.1882	1.84672	0.884966	0.0951018	0.715747
ENSMUSG00000029017	Pmpcb	peptidase (mitochondrial processing) beta	1593.07	1125.83	1.41466	0.500452	0.095113	0.715747
ENSMUSG00000093606	B130034C11Rik	RIKEN cDNA B130034C11 gene	12.5822	3.5457	2.98792	1.57914	0.0951916	0.716058
ENSMUSG00000019831	Wasf1	WAS protein family, member 1	26.9403	11.7306	2.19473	1.13405	0.0953419	0.716652
ENSMUSG00000039934	Gsap	gamma-secretase activating protein	387.837	247.874	1.56239	0.643751	0.0953904	0.716652
ENSMUSG00000025176	Hoga1	4-hydroxy-2-oxoglutarate aldolase 1	958.868	522.138	1.83483	0.875645	0.0957588	0.71719
ENSMUSG00000001082	Mfsd10	major facilitator superfamily domain containing 10	89.6784	53.3867	1.66729	0.737504	0.0956985	0.71719
ENSMUSG00000015027	Galns	galactosamine (N-acetyl)-6-sulfate sulfatase	887.916	607.512	1.4608	0.546762	0.0957635	0.71719
ENSMUSG00000081400	Gm13680	predicted gene 13680	304.059	204.364	1.48545	0.570903	0.0959032	0.71727
ENSMUSG00000055435	Maf	avian musculoaponeurotic fibrosarcoma oncogene homolog	6305.43	3935.6	1.602	0.679874	0.096272	0.718102
ENSMUSG00000009894	Snap47	synaptosomal-associated protein, 47	669.736	461.674	1.44969	0.535748	0.0966259	0.718108
ENSMUSG00000063787	Chchd1	coiled-coil-helix-coiled-coil-helix domain containing 1	276.849	182.447	1.5146	0.598939	0.0963479	0.718108
ENSMUSG00000071470	Ccnb1ip1	cyclin B1 interacting protein 1	4.45656	0	5.45656	2.44799	0.0968631	0.718108
ENSMUSG00000045763	Basp1	brain abundant, membrane attached signal protein 1	263.294	175.181	1.50013	0.585085	0.0967229	0.718108
ENSMUSG00000023829	Slc22a1	solute carrier family 22 (organic cation transporter), member 1	1798.57	1224.25	1.46875	0.554584	0.0964023	0.718108
ENSMUSG00000066170	E230001N04Rik	RIKEN cDNA E230001N04 gene	56.0152	27.4675	2.00282	1.00203	0.0964183	0.718108
ENSMUSG00000052142	Rasal3	RAS protein activator like 3	443.451	103.767	4.24228	2.08484	0.0965975	0.718108
ENSMUSG00000024781	Lipa	lysosomal acid lipase A	2188.38	1507.52	1.45134	0.537386	0.0965003	0.718108
ENSMUSG00000012123	Aim1l	absent in melanoma 1-like	124.311	38.9434	3.13721	1.64948	0.0967979	0.718108
ENSMUSG00000047592	Nxpe5	neurexophilin and PC-esterase domain family, member 5	8.72795	1.37077	4.10329	2.03678	0.0969408	0.718108
ENSMUSG00000074420	Gm10693	predicted pseudogene 10693	6.50529	0.663575	4.51154	2.17362	0.0967265	0.718108
ENSMUSG00000040660	Cyp2b9	cytochrome P450, family 2, subfamily b, polypeptide 9	16.1368	2.25819	5.25961	2.39495	0.0965781	0.718108
ENSMUSG00000032640	Chsy1	chondroitin sulfate synthase 1	198.52	126.936	1.55953	0.641115	0.0969251	0.718108
ENSMUSG00000020042	Btbd11	BTB (POZ) domain containing 11	232.715	152.118	1.52637	0.610107	0.0971217	0.7182
ENSMUSG00000022847	Thpo	thrombopoietin	76.8534	44.4504	1.71293	0.776467	0.0970923	0.7182
ENSMUSG00000025243	Slc6a20b	solute carrier family 6 (neurotransmitter transporter), member 20B	1173.34	733.934	1.59788	0.676162	0.0970937	0.7182
ENSMUSG00000059089	Fcgr4	Fc receptor, IgG, low affinity IV	161.906	82.8475	1.94289	0.958201	0.0974558	0.718455
ENSMUSG00000076617	Ighm	immunoglobulin heavy constant mu	804.36	389.893	2.06031	1.04286	0.0973871	0.718455
ENSMUSG00000075705	Msrb1	methionine sulfoxide reductase B1	612.269	433.374	1.41185	0.497583	0.0975722	0.718455
ENSMUSG00000004530	Coro1c	coronin, actin binding protein 1C	980.747	673.784	1.45491	0.540926	0.0974839	0.718455
ENSMUSG00000030868	Dctn5	dynactin 5	426.057	284.922	1.49361	0.578806	0.0975411	0.718455
ENSMUSG00000030745	Il21r	interleukin 21 receptor	301.301	104.63	2.86189	1.51697	0.0975858	0.718455
ENSMUSG00000031303	Map3k15	mitogen-activated protein kinase kinase kinase 15	362.825	229.027	1.58166	0.661443	0.0975701	0.718455
ENSMUSG00000011256	Adam19	a disintegrin and metallopeptidase domain 19 (meltrin beta)	477.032	182.59	2.6038	1.38062	0.0978949	0.719564
ENSMUSG00000062929	Cfl2	cofilin 2, muscle	387.22	269.698	1.43415	0.520192	0.0979636	0.719564
ENSMUSG00000004609	Cd33	CD33 antigen	332.463	157.068	2.10962	1.07698	0.0978991	0.719564
ENSMUSG00000076880	Traj51	T cell receptor alpha joining 51	4.15869	0	5.15869	2.367	0.0981008	0.719839
ENSMUSG00000015947	Fcgr1	Fc receptor, IgG, high affinity I	141.554	84.702	1.66336	0.734103	0.0981263	0.719839
ENSMUSG00000020098	Pcbd1	pterin 4 alpha carbinolamine dehydratase/dimerization cofactor of hepatocyte nuclear factor 1 alpha (TCF1) 1	787.938	560.665	1.40464	0.490204	0.0981986	0.720112
ENSMUSG00000004610	Etfb	electron transferring flavoprotein, beta polypeptide	3154.18	2102.42	1.50002	0.584983	0.0982773	0.720338
ENSMUSG00000020116	Pno1	partner of NOB1 homolog	340.763	226.988	1.49904	0.58404	0.0984209	0.720965
ENSMUSG00000087624	9230111E07Rik	RIKEN cDNA 9230111E07 gene	9.83238	2.03434	3.56993	1.8359	0.0986983	0.720973
ENSMUSG00000033752	Mnd1	meiotic nuclear divisions 1	11.6218	2.92176	3.2184	1.68634	0.0984847	0.720973
ENSMUSG00000041272	Tox	thymocyte selection-associated high mobility group box	161.395	27.1971	5.75928	2.52589	0.0987044	0.720973
ENSMUSG00000000486	Sept1	septin 1	257.954	73.3149	3.48456	1.80098	0.0985336	0.720973
ENSMUSG00000005696	Sh2d1a	SH2 domain containing 1A	8.85448	0.775498	5.55026	2.47256	0.0985127	0.720973
ENSMUSG00000055629	B4galnt4	beta-1,4-N-acetyl-galactosaminyl transferase 4	23.3352	3.81611	5.05287	2.3371	0.0987782	0.721254
ENSMUSG00000086229	Gm4887	predicted gene 4887	196.232	129.222	1.51459	0.598923	0.0992059	0.723084
ENSMUSG00000051998	Lax1	lymphocyte transmembrane adaptor 1	142.49	32.0419	4.34265	2.11858	0.0992421	0.72309
ENSMUSG00000023915	Tnfrsf21	tumor necrosis factor receptor superfamily, member 21	2587.46	1742.76	1.48442	0.569897	0.0994614	0.723109
ENSMUSG00000027690	Slc2a2	solute carrier family 2 (facilitated glucose transporter), member 2	1224.94	858.954	1.42559	0.511558	0.099504	0.723109
ENSMUSG00000028712	Cyp4a31	cytochrome P450, family 4, subfamily a, polypeptide 31	685.23	418.138	1.63724	0.711268	0.0995633	0.723109
ENSMUSG00000085249	Gm12847	predicted gene 12847	5.81532	0.342692	5.07586	2.34365	0.0994157	0.723109
ENSMUSG00000047844	Bex4	brain expressed X-linked 4	82.4826	44.7604	1.82434	0.867378	0.0993178	0.723109
ENSMUSG00000062727	Hist1h2bk	histone cluster 1, H2bk	40.3152	19.5609	2.00941	1.00677	0.100187	0.726346
ENSMUSG00000076904	Traj25	T cell receptor alpha joining 25	5.34372	0.443711	4.39404	2.13555	0.100273	0.726571
ENSMUSG00000035235	Trim13	tripartite motif-containing 13	81.3196	47.5037	1.69718	0.763141	0.100465	0.727326
ENSMUSG00000003528	Slc25a1	solute carrier family 25 (mitochondrial carrier, citrate transporter), member 1	662.051	457.764	1.4453	0.531369	0.100631	0.727326
ENSMUSG00000024317	Rnf138	ring finger protein 138	191.953	123.239	1.55308	0.635128	0.100742	0.727326
ENSMUSG00000027359	Slc27a2	solute carrier family 27 (fatty acid transporter), member 2	20423.1	12884.1	1.5851	0.66457	0.100689	0.727326
ENSMUSG00000027843	Ptpn22	protein tyrosine phosphatase, non-receptor type 22 (lymphoid)	858.728	220.757	3.8769	1.9549	0.100821	0.727326
ENSMUSG00000052738	Suclg1	succinate-CoA ligase, GDP-forming, alpha subunit	2994.87	2151.37	1.39189	0.47705	0.100665	0.727326
ENSMUSG00000068877	Selenbp2	selenium binding protein 2	213.502	125.881	1.69057	0.757514	0.101262	0.72844
ENSMUSG00000015112	Slc25a13	solute carrier family 25 (mitochondrial carrier, adenine nucleotide translocator), member 13	867.896	557.319	1.55627	0.638094	0.101296	0.72844
ENSMUSG00000015484	Fam163a	family with sequence similarity 163, member A	140.91	74.7844	1.87255	0.905007	0.101535	0.729154
ENSMUSG00000073492	Gm10521	predicted gene 10521	17.1296	5.33837	2.8603	1.51616	0.101704	0.729633
ENSMUSG00000050272	Dscam	Down syndrome cell adhesion molecule	19.6871	3.31787	4.79105	2.26034	0.101819	0.729633
ENSMUSG00000035473	Galm	galactose mutarotase	1010.88	714.611	1.41401	0.499793	0.101781	0.729633
ENSMUSG00000038121	Fam210a	family with sequence similarity 210, member A	1802.71	1312.19	1.37354	0.457897	0.101934	0.730196
ENSMUSG00000067071	Hes6	hairy and enhancer of split 6	405.371	271.697	1.4902	0.575501	0.102567	0.730501
ENSMUSG00000020189	Osbpl8	oxysterol binding protein-like 8	2824.89	2005.26	1.40853	0.494191	0.102614	0.730501
ENSMUSG00000021185	9030617O03Rik	RIKEN cDNA 9030617O03 gene	1308.77	841.996	1.55371	0.635718	0.102315	0.730501
ENSMUSG00000022856	Tmem41a	transmembrane protein 41a	104.785	65.6304	1.58764	0.66688	0.10262	0.730501
ENSMUSG00000062619	2310039H08Rik	RIKEN cDNA 2310039H08 gene	129.07	80.7255	1.59154	0.670426	0.102172	0.730501
ENSMUSG00000024694	Keg1	kidney expressed gene 1	7460.06	4358.87	1.7113	0.775095	0.10246	0.730501
ENSMUSG00000043252	Tmem64	transmembrane protein 64	1078.68	768.391	1.4033	0.48882	0.102427	0.730501
ENSMUSG00000051844	B230319C09Rik	RIKEN cDNA B230319C09 gene	73.2172	42.1149	1.72138	0.783568	0.102277	0.730501
ENSMUSG00000030149	Klrk1	killer cell lectin-like receptor subfamily K, member 1	231.19	66.7948	3.42489	1.77606	0.102466	0.730501
ENSMUSG00000030814	Bcl7c	B cell CLL/lymphoma 7C	107.748	64.5095	1.66004	0.731219	0.10253	0.730501
ENSMUSG00000031482	Slc25a15	solute carrier family 25 (mitochondrial carrier ornithine transporter), member 15	1437.77	845.343	1.69999	0.765523	0.102517	0.730501
ENSMUSG00000025588	Nat1	N-acetyl transferase 1	6.44764	0.685383	4.41896	2.14371	0.102256	0.730501
ENSMUSG00000071719	Tmem28	transmembrane protein 28	88.6168	41.0086	2.1333	1.09308	0.102199	0.730501
ENSMUSG00000078566	Bnip3	BCL2/adenovirus E1B interacting protein 3	300.802	204.342	1.46976	0.555578	0.102965	0.731966
ENSMUSG00000026069	Il1rl1	interleukin 1 receptor-like 1	314.221	101.77	3.06726	1.61695	0.103288	0.732504
ENSMUSG00000021335	Slc17a1	solute carrier family 17 (sodium phosphate), member 1	2113.45	1326.74	1.59252	0.671313	0.103199	0.732504
ENSMUSG00000005225	Plekha8	pleckstrin homology domain containing, family A (phosphoinositide binding specific) member 8	527.568	365.992	1.44027	0.526341	0.103271	0.732504
ENSMUSG00000082465	Rps6-ps3	ribosomal protein S6, pseudogene 3	46.5588	22.2875	2.04224	1.03015	0.103124	0.732504
ENSMUSG00000023277	Twf2	twinfilin actin binding protein 2	213.157	140.562	1.51282	0.597237	0.103296	0.732504
ENSMUSG00000025645	Ccdc51	coiled-coil domain containing 51	98.8047	61.5343	1.596	0.674461	0.103213	0.732504
ENSMUSG00000027761	Aadac	arylacetamide deacetylase (esterase)	414.702	290.315	1.42698	0.512969	0.103496	0.733645
ENSMUSG00000076919	Traj9	T cell receptor alpha joining 9	6.81122	0.663575	4.69544	2.23126	0.103622	0.733798
ENSMUSG00000032788	Pdxk	pyridoxal (pyridoxine, vitamin B6) kinase	974.631	683.695	1.42491	0.510875	0.103728	0.734297
ENSMUSG00000076754	Trgv2	T cell receptor gamma variable 2	32.2726	4.54505	6.00042	2.58506	0.103827	0.734609
ENSMUSG00000053329	D10Jhu81e	DNA segment, Chr 10, Johns Hopkins University 81 expressed	1245.34	870.227	1.43056	0.516579	0.103991	0.735387
ENSMUSG00000020258	Glyctk	glycerate kinase	570.105	294.197	1.93465	0.952076	0.104113	0.735944
ENSMUSG00000032026	Rexo2	RNA exonuclease 2	665.698	453.684	1.46629	0.55217	0.104312	0.736896
ENSMUSG00000046756	Mrps7	mitchondrial ribosomal protein S7	601.728	417.261	1.44103	0.527104	0.104563	0.737138
ENSMUSG00000041596	Nlrp5-ps	NLR family, pyrin domain containing 5, pseudogene	36.0262	17.7901	1.97052	0.978574	0.104541	0.737138
ENSMUSG00000064202	4430402I18Rik	RIKEN cDNA 4430402I18 gene	64.9604	39.5883	1.62511	0.700535	0.104917	0.73825
ENSMUSG00000001482	Def8	differentially expressed in FDCP 8	1315.73	791.554	1.66138	0.732382	0.104942	0.73825
ENSMUSG00000030905	Crym	crystallin, mu	240.115	102.677	2.32563	1.21762	0.105102	0.738645
ENSMUSG00000027710	Acad9	acyl-Coenzyme A dehydrogenase family, member 9	584.022	409.786	1.42415	0.510102	0.105154	0.738754
ENSMUSG00000020149	Rab1a	RAB1A, member RAS oncogene family	2701.26	1923.2	1.40435	0.489906	0.105365	0.739045
ENSMUSG00000028033	Kcnq5	potassium voltage-gated channel, subfamily Q, member 5	60.016	14.7247	3.88026	1.95615	0.105895	0.740411
ENSMUSG00000081277	Gm15285	predicted gene 15285	245.09	165.394	1.47896	0.564583	0.105795	0.740411
ENSMUSG00000084215	Gm11814	predicted gene 11814	64.1087	36.6765	1.7281	0.789186	0.105996	0.740411
ENSMUSG00000081855	Rpl17-ps5	ribosomal protein L17, pseudogene 5	64.9904	40.2192	1.60096	0.67894	0.105925	0.740411
ENSMUSG00000034826	Nup54	nucleoporin 54	180.443	116.433	1.54508	0.627677	0.105935	0.740411
ENSMUSG00000081895	Rpl17-ps10	ribosomal protein L17, pseudogene 10	561.132	390.657	1.43527	0.521318	0.105952	0.740411
ENSMUSG00000022295	Atp6v1c1	ATPase, H+ transporting, lysosomal V1 subunit C1	908.883	637.151	1.42581	0.511782	0.106242	0.741554
ENSMUSG00000024424	Ttc39c	tetratricopeptide repeat domain 39C	264.76	176.755	1.49509	0.580235	0.106444	0.741816
ENSMUSG00000030167	Klrc1	killer cell lectin-like receptor subfamily C, member 1	66.9	18.0523	3.56387	1.83344	0.106461	0.741816
ENSMUSG00000065698	Gm25409	predicted gene, 25409	4.44116	0	5.44116	2.44391	0.106377	0.741816
ENSMUSG00000022792	Yars2	tyrosyl-tRNA synthetase 2 (mitochondrial)	171.607	114.673	1.49219	0.577429	0.106677	0.742054
ENSMUSG00000030036	Mogs	mannosyl-oligosaccharide glucosidase	423.88	295.681	1.43211	0.518142	0.106919	0.742982
ENSMUSG00000069520	Tmem19	transmembrane protein 19	555.948	378.749	1.46662	0.552498	0.107023	0.743304
ENSMUSG00000044811	Cd300c2	CD300C molecule 2	124.73	73.3921	1.6901	0.757109	0.107134	0.743304
ENSMUSG00000028713	Cyp4b1	cytochrome P450, family 4, subfamily b, polypeptide 1	18105.9	12410.2	1.45892	0.544896	0.107044	0.743304
ENSMUSG00000031887	Tradd	TNFRSF1A-associated via death domain	112.923	67.9152	1.65309	0.725167	0.107148	0.743304
ENSMUSG00000022401	Xpnpep3	X-prolyl aminopeptidase 3, mitochondrial	299.726	192.564	1.55362	0.635638	0.107264	0.743412
ENSMUSG00000000409	Lck	lymphocyte protein tyrosine kinase	237.405	61.6715	3.80405	1.92753	0.107262	0.743412
ENSMUSG00000020225	Tmbim4	transmembrane BAX inhibitor motif containing 4	666.043	457.86	1.4537	0.539726	0.107481	0.744276
ENSMUSG00000092072	Gm4540	predicted gene 4540	206.108	130.37	1.57652	0.65674	0.107507	0.744276
ENSMUSG00000023068	Nus1	NUS1 dehydrodolichyl diphosphate synthase subunit	2356.2	1679.7	1.40251	0.488013	0.107858	0.745609
ENSMUSG00000076441	Ass1	argininosuccinate synthetase 1	2453.23	1346.48	1.82135	0.865005	0.107882	0.745609
ENSMUSG00000020629	Adi1	acireductone dioxygenase 1	524.499	362.175	1.44696	0.533024	0.107958	0.745882
ENSMUSG00000088022	Gm22146	predicted gene, 22146	10.5885	1.77086	4.18229	2.06429	0.108094	0.746319
ENSMUSG00000073633	Fbxo36	F-box protein 36	208.048	141.41	1.46792	0.553778	0.108275	0.746809
ENSMUSG00000078970	Wdr92	WD repeat domain 92	95.0015	57.4554	1.6423	0.715721	0.108443	0.747714
ENSMUSG00000089678	Agxt2	alanine-glyoxylate aminotransferase 2	826.939	476.291	1.73466	0.794656	0.10873	0.74912
ENSMUSG00000089694	Nat8f7	N-acetyltransferase 8 (GCN5-related) family member 7	44.7212	25.3194	1.73717	0.796739	0.108757	0.74912
ENSMUSG00000025545	Clybl	citrate lyase beta like	543.843	367.4	1.47895	0.564569	0.108918	0.749487
ENSMUSG00000038522	Mfsd4b1	major facilitator superfamily domain containing 4B1	1125.59	783.636	1.43581	0.521864	0.109302	0.750347
ENSMUSG00000028001	Fga	fibrinogen alpha chain	100.532	56.0819	1.77871	0.830828	0.1093	0.750347
ENSMUSG00000005362	Crbn	cereblon	662.426	482.372	1.3725	0.456803	0.109354	0.750452
ENSMUSG00000029545	Acads	acyl-Coenzyme A dehydrogenase, short chain	907.063	584.559	1.55076	0.632978	0.10942	0.750649
ENSMUSG00000040174	Alkbh3	alkB homolog 3, alpha-ketoglutarate-dependent dioxygenase	259.555	171.919	1.5068	0.591488	0.109946	0.752261
ENSMUSG00000032758	Kap	kidney androgen regulated protein	47106.6	28864.1	1.63199	0.706635	0.110026	0.752531
ENSMUSG00000041119	Pde9a	phosphodiesterase 9A	398.3	264.487	1.50403	0.588831	0.110352	0.754006
ENSMUSG00000055805	Fmnl1	formin-like 1	2030.1	1387	1.46333	0.549254	0.110655	0.75457
ENSMUSG00000028189	Ctbs	chitobiase, di-N-acetyl-	408.772	287.806	1.41885	0.504719	0.11065	0.75457
ENSMUSG00000015405	Ace2	angiotensin I converting enzyme (peptidyl-dipeptidase A) 2	285.883	187.12	1.525	0.608813	0.110601	0.75457
ENSMUSG00000031696	Vps35	VPS35 retromer complex component	1803.58	1302.56	1.38434	0.469203	0.11078	0.754659
ENSMUSG00000014470	Rnf166	ring finger protein 166	301.574	206.326	1.45941	0.545389	0.110758	0.754659
ENSMUSG00000020798	Spns3	spinster homolog 3	117.607	35.1225	3.28346	1.71522	0.11096	0.754808
ENSMUSG00000027423	Snx5	sorting nexin 5	1673.19	1199.47	1.39461	0.479864	0.111283	0.75543
ENSMUSG00000010651	Acaa1b	acetyl-Coenzyme A acyltransferase 1B	680.147	391.897	1.73365	0.793813	0.111345	0.75548
ENSMUSG00000025481	Urah	urate (5-hydroxyiso-) hydrolase	21.8304	6.96172	2.86752	1.5198	0.111437	0.755541
ENSMUSG00000054892	Txk	TXK tyrosine kinase	97.8096	23.8741	3.9724	1.99001	0.11172	0.75616
ENSMUSG00000003849	Nqo1	NAD(P)H dehydrogenase, quinone 1	204.069	133.241	1.52762	0.611286	0.111704	0.75616
ENSMUSG00000027636	Sla2	Src-like-adaptor 2	54.9378	16.3528	3.22356	1.68866	0.111927	0.756662
ENSMUSG00000027219	Slc28a2	solute carrier family 28 (sodium-coupled nucleoside transporter), member 2	86.4431	26.7373	3.15255	1.65652	0.112019	0.756783
ENSMUSG00000041301	Cftr	cystic fibrosis transmembrane conductance regulator	151.697	77.4347	1.94681	0.96111	0.112205	0.757281
ENSMUSG00000031387	Renbp	renin binding protein	732.117	414.281	1.76535	0.819957	0.112315	0.757281
ENSMUSG00000090602	Gm5611	predicted gene 5611	16.5937	4.71443	3.07882	1.62238	0.112437	0.757857
ENSMUSG00000055826	Tescl	tescalcin-like	5.48535	0.443711	4.49214	2.1674	0.112527	0.75821
ENSMUSG00000051022	Hs3st1	heparan sulfate (glucosamine) 3-O-sulfotransferase 1	68.3109	30.2308	2.21931	1.15011	0.112675	0.758709
ENSMUSG00000023919	Cenpq	centromere protein Q	50.0519	29.7365	1.66095	0.732013	0.11285	0.759135
ENSMUSG00000017493	Igfbp4	insulin-like growth factor binding protein 4	6992.37	4854.06	1.44043	0.526501	0.113009	0.759702
ENSMUSG00000020086	H2afy2	H2A histone family, member Y2	63.3402	36.9559	1.69513	0.761395	0.113252	0.760585
ENSMUSG00000021832	Psmc6	proteasome (prosome, macropain) 26S subunit, ATPase, 6	925.251	653.679	1.41482	0.500614	0.113219	0.760585
ENSMUSG00000082536	Gm13456	predicted gene 13456	4106.21	2962.92	1.38573	0.470651	0.11346	0.761234
ENSMUSG00000026321	Tnfrsf11a	tumor necrosis factor receptor superfamily, member 11a, NFKB activator	180.514	110.292	1.63097	0.705727	0.113792	0.761442
ENSMUSG00000023044	Csad	cysteine sulfinic acid decarboxylase	1184.48	597.564	1.98055	0.985898	0.113739	0.761442
ENSMUSG00000062908	Acadm	acyl-Coenzyme A dehydrogenase, medium chain	4244.71	3068.97	1.38298	0.467783	0.11367	0.761442
ENSMUSG00000035637	Grhpr	glyoxylate reductase/hydroxypyruvate reductase	796.545	532.692	1.49439	0.579558	0.113827	0.761442
ENSMUSG00000042096	Dao	D-amino acid oxidase	2620.38	1466.61	1.78615	0.836855	0.113772	0.761442
ENSMUSG00000009145	Dqx1	DEAQ RNA-dependent ATPase	113.273	69.8022	1.61398	0.69062	0.113824	0.761442
ENSMUSG00000030538	Cib1	calcium and integrin binding 1 (calmyrin)	642.574	453.893	1.41478	0.50058	0.113675	0.761442
ENSMUSG00000025903	Lypla1	lysophospholipase 1	1304.61	911.511	1.43078	0.516806	0.114034	0.762482
ENSMUSG00000068037	Mas1	MAS1 oncogene	20.9346	8.27796	2.36416	1.24133	0.114399	0.762774
ENSMUSG00000032387	Rbpms2	RNA binding protein with multiple splicing 2	780.478	506.334	1.54036	0.623271	0.114381	0.762774
ENSMUSG00000033488	BC026585	cDNA sequence BC026585	1624.96	911.532	1.78182	0.833348	0.114749	0.763595
ENSMUSG00000005681	Apoa2	apolipoprotein A-II	28.2596	12.4298	2.1787	1.12347	0.114978	0.763595
ENSMUSG00000019189	Rnf145	ring finger protein 145	709.584	491.569	1.44261	0.528679	0.114958	0.763595
ENSMUSG00000024246	Thumpd2	THUMP domain containing 2	61.4207	35.8395	1.69439	0.760769	0.114977	0.763595
ENSMUSG00000052595	A1cf	APOBEC1 complementation factor	1204.81	717.648	1.67788	0.74664	0.1147	0.763595
ENSMUSG00000082743	Gm12988	predicted gene 12988	146.352	100.939	1.44549	0.531556	0.11471	0.763595
ENSMUSG00000038065	Mturn	maturin, neural progenitor differentiation regulator homolog (Xenopus)	1648.28	1147.56	1.43596	0.522013	0.114686	0.763595
ENSMUSG00000063229	Ldha	lactate dehydrogenase A	2401.5	1743.58	1.37712	0.461657	0.114972	0.763595
ENSMUSG00000026000	Lancl1	LanC (bacterial lantibiotic synthetase component C)-like 1	196.309	126.503	1.54749	0.629928	0.115243	0.764242
ENSMUSG00000042660	Wdr55	WD repeat domain 55	218.582	151.044	1.4442	0.53027	0.115368	0.764242
ENSMUSG00000030909	Anks4b	ankyrin repeat and sterile alpha motif domain containing 4B	877.37	464.025	1.88887	0.91752	0.115225	0.764242
ENSMUSG00000049287	Iba57	IBA57 homolog, iron-sulfur cluster assembly	178.283	122.132	1.45602	0.542032	0.115518	0.764738
ENSMUSG00000020383	Il13	interleukin 13	10.7761	2.43842	3.42486	1.77605	0.11565	0.764872
ENSMUSG00000029162	Khk	ketohexokinase	2683.09	1572.37	1.70595	0.770573	0.115618	0.764872
ENSMUSG00000043681	Fam25c	family with sequence similarity 25, member C	7.30816	1.10729	3.94259	1.97914	0.115877	0.765629
ENSMUSG00000092118	Fancf	Fanconi anemia, complementation group F	46.0841	25.9531	1.74689	0.804788	0.115949	0.765855
ENSMUSG00000022752	Tomm70a	translocase of outer mitochondrial membrane 70 homolog A (yeast)	1103.3	790.644	1.39495	0.480211	0.116016	0.766054
ENSMUSG00000044783	Hjurp	Holliday junction recognition protein	538.957	384.038	1.40235	0.487844	0.116117	0.766221
ENSMUSG00000028127	Abcd3	ATP-binding cassette, sub-family D (ALD), member 3	3456.98	2538.56	1.36164	0.445348	0.116097	0.766221
ENSMUSG00000081865	Gm15484	predicted gene 15484	68.0174	41.1927	1.63577	0.709966	0.116465	0.766823
ENSMUSG00000083364	Llph-ps2	LLP homolog, pseudogene 2	171.053	110.46	1.54363	0.626326	0.116397	0.766823
ENSMUSG00000035824	Tk2	thymidine kinase 2, mitochondrial	286.839	197.562	1.44962	0.535675	0.116689	0.767023
ENSMUSG00000040502	March9	membrane-associated ring finger (C3HC4) 9	156.368	103.962	1.49929	0.584276	0.116981	0.768428
ENSMUSG00000042210	Abhd14a	abhydrolase domain containing 14A	252.005	169.959	1.47992	0.565515	0.117053	0.768428
ENSMUSG00000005150	Wdr83	WD repeat domain containing 83	117.483	71.1016	1.64328	0.716581	0.117147	0.76855
ENSMUSG00000040351	Ankib1	ankyrin repeat and IBR domain containing 1	1994.9	1440.53	1.38457	0.469437	0.117209	0.76871
ENSMUSG00000061825	Ces2c	carboxylesterase 2C	332.597	221.378	1.50013	0.585091	0.117336	0.769293
ENSMUSG00000024346	Pfdn1	prefoldin 1	667.015	471.835	1.41279	0.498544	0.117422	0.769365
ENSMUSG00000040405	Havcr1	hepatitis A virus cellular receptor 1	54.4404	14.6227	3.54871	1.8273	0.117671	0.77075
ENSMUSG00000021751	Acox2	acyl-Coenzyme A oxidase 2, branched chain	312.14	173.227	1.79731	0.845842	0.117964	0.771431
ENSMUSG00000035310	Lin54	lin-54 homolog (C. elegans)	261.81	180.316	1.44946	0.535511	0.117883	0.771431
ENSMUSG00000032246	Calml4	calmodulin-like 4	1979.65	945.805	2.09193	1.06483	0.117813	0.771431
ENSMUSG00000026458	Ppfia4	protein tyrosine phosphatase, receptor type, f polypeptide (PTPRF), interacting protein (liprin), alpha 4	88.5149	27.4446	3.14699	1.65397	0.118066	0.77185
ENSMUSG00000076913	Traj16	T cell receptor alpha joining 16	6.50659	0.663575	4.51232	2.17387	0.118229	0.771921
ENSMUSG00000038009	Dnajc22	DnaJ heat shock protein family (Hsp40) member C22	586.646	361.524	1.62098	0.69687	0.118287	0.771921
ENSMUSG00000026827	Gpd2	glycerol phosphate dehydrogenase 2, mitochondrial	897.814	633.175	1.4173	0.503142	0.118286	0.771921
ENSMUSG00000031373	Car5b	carbonic anhydrase 5b, mitochondrial	561.229	401.027	1.39849	0.483866	0.118177	0.771921
ENSMUSG00000089224	Gm22075	predicted gene, 22075	3.72674	0	4.72674	2.24084	0.118729	0.772111
ENSMUSG00000035790	Cep19	centrosomal protein 19	323.481	223.534	1.44513	0.531202	0.118723	0.772111
ENSMUSG00000071267	Zfp942	zinc finger protein 942	188.69	130.04	1.44757	0.533638	0.118781	0.772111
ENSMUSG00000024785	Rcl1	RNA terminal phosphate cyclase-like 1	127.164	80.1394	1.57955	0.659512	0.118745	0.772111
ENSMUSG00000023456	Tpi1	triosephosphate isomerase 1	2535.85	1703.92	1.48796	0.573339	0.11867	0.772111
ENSMUSG00000084110	Gm4992	predicted pseudogene 4992	3.72674	0	4.72674	2.24084	0.118729	0.772111
ENSMUSG00000059461	Gm7331	predicted gene 7331	67.2492	39.198	1.69782	0.763686	0.118945	0.772652
ENSMUSG00000029556	Hnf1a	HNF1 homeobox A	654.575	408.735	1.6	0.67807	0.119109	0.773043
ENSMUSG00000040855	Reps2	RALBP1 associated Eps domain containing protein 2	1168.65	771.918	1.5133	0.597693	0.119131	0.773043
ENSMUSG00000041797	Abca9	ATP-binding cassette, sub-family A (ABC1), member 9	721.052	386.311	1.86427	0.898611	0.119428	0.773924
ENSMUSG00000020150	Gamt	guanidinoacetate methyltransferase	88.2456	43.0766	2.02479	1.01777	0.119621	0.774379
ENSMUSG00000018927	Ccl6	chemokine (C-C motif) ligand 6	294.286	197.69	1.48616	0.571591	0.119628	0.774379
ENSMUSG00000079104	Prps1l3	phosphoribosyl pyrophosphate synthetase 1-like 3	346.738	243.418	1.42272	0.508651	0.119867	0.774609
ENSMUSG00000076907	Traj22	T cell receptor alpha joining 22	22.4113	1.77484	8.43699	3.07673	0.119834	0.774609
ENSMUSG00000029378	Areg	amphiregulin	89.6995	28.7538	3.04833	1.60802	0.119765	0.774609
ENSMUSG00000002870	Mcm2	minichromosome maintenance complex component 2	217.16	143.598	1.50874	0.593341	0.11981	0.774609
ENSMUSG00000050967	Creg2	cellular repressor of E1A-stimulated genes 2	22.8695	9.87944	2.194	1.13356	0.120093	0.774931
ENSMUSG00000025785	Exosc7	exosome component 7	188.005	118.196	1.58567	0.665095	0.120092	0.774931
ENSMUSG00000020078	Vps26a	VPS26 retromer complex component A	856.236	611.588	1.39937	0.484777	0.120592	0.775752
ENSMUSG00000026956	Uap1l1	UDP-N-acteylglucosamine pyrophosphorylase 1-like 1	749.919	493.317	1.5191	0.603221	0.12051	0.775752
ENSMUSG00000028367	Txn1	thioredoxin 1	430.311	306.707	1.40169	0.487171	0.120514	0.775752
ENSMUSG00000034744	Nagk	N-acetylglucosamine kinase	267.374	186.183	1.43375	0.519794	0.120534	0.775752
ENSMUSG00000032372	Plscr2	phospholipid scramblase 2	2637.77	1906.48	1.38339	0.468203	0.1206	0.775752
ENSMUSG00000033965	Slc16a2	solute carrier family 16 (monocarboxylic acid transporters), member 2	1679.17	1213.06	1.38394	0.468777	0.120496	0.775752
ENSMUSG00000026024	Als2	amyotrophic lateral sclerosis 2 (juvenile)	848.267	608.865	1.39255	0.477729	0.120678	0.775787
ENSMUSG00000025371	Chmp6	charged multivesicular body protein 6	365.815	248.584	1.4697	0.555526	0.120947	0.775787
ENSMUSG00000063268	Parp10	poly (ADP-ribose) polymerase family, member 10	355.624	239.357	1.48373	0.569224	0.120824	0.775787
ENSMUSG00000037172	E330009J07Rik	RIKEN cDNA E330009J07 gene	312.964	222.538	1.40452	0.49008	0.12082	0.775787
ENSMUSG00000040613	Apobec1	apolipoprotein B mRNA editing enzyme, catalytic polypeptide 1	547.873	308.944	1.77088	0.824466	0.120925	0.775787
ENSMUSG00000030587	2200002D01Rik	RIKEN cDNA 2200002D01 gene	90.7253	52.6749	1.7089	0.773072	0.120926	0.775787
ENSMUSG00000064127	Med14	mediator complex subunit 14	1162.74	832.371	1.39642	0.481738	0.120934	0.775787
ENSMUSG00000071708	Sms	spermine synthase	149.199	100.102	1.48562	0.571066	0.120778	0.775787
ENSMUSG00000051354	Samd3	sterile alpha motif domain containing 3	82.107	15.2742	5.10668	2.35239	0.121255	0.776304
ENSMUSG00000021182	Ccdc88c	coiled-coil domain containing 88C	1242.47	754.866	1.64509	0.718167	0.121311	0.776304
ENSMUSG00000021884	Hacl1	2-hydroxyacyl-CoA lyase 1	286.915	203.756	1.40614	0.491737	0.12117	0.776304
ENSMUSG00000024386	Proc	protein C	1067	678.332	1.57213	0.652725	0.12112	0.776304
ENSMUSG00000025533	Asl	argininosuccinate lyase	1812.85	1156.45	1.56711	0.648102	0.121393	0.776304
ENSMUSG00000036526	Card11	caspase recruitment domain family, member 11	401.157	144.256	2.7686	1.46916	0.121067	0.776304
ENSMUSG00000083482	Gm14706	predicted gene 14706	20.9601	8.4226	2.33058	1.22069	0.121374	0.776304
ENSMUSG00000029810	Tmem176b	transmembrane protein 176B	5007.5	3546.05	1.41202	0.497762	0.121717	0.776522
ENSMUSG00000043932	Klri2	killer cell lectin-like receptor family I member 2	42.0697	10.341	3.79771	1.92513	0.121701	0.776522
ENSMUSG00000081126	Gm15784	predicted gene 15784	45.2032	22.9649	1.92795	0.94707	0.121716	0.776522
ENSMUSG00000086583	Gm15500	predicted pseudogene 15500	4520.78	3274.93	1.3803	0.464986	0.121604	0.776522
ENSMUSG00000057841	Rpl32	ribosomal protein L32	1204.99	866.761	1.38978	0.474853	0.121797	0.776605
ENSMUSG00000029530	Ccr9	chemokine (C-C motif) receptor 9	46.7199	14.1571	3.14836	1.6546	0.121895	0.776987
ENSMUSG00000022982	Sod1	superoxide dismutase 1, soluble	1929.11	1307.42	1.47514	0.560856	0.122137	0.778044
ENSMUSG00000071867	Gm6304	predicted gene 6304	139.616	94.037	1.4796	0.565203	0.122114	0.778044
ENSMUSG00000019787	Trdn	triadin	35.4744	16.2361	2.11617	1.08145	0.122327	0.778486
ENSMUSG00000024387	Csnk2b	casein kinase 2, beta polypeptide	923.265	671.519	1.37433	0.458731	0.122609	0.778486
ENSMUSG00000082512	Gm13937	predicted gene 13937	20.2157	6.5645	2.80463	1.48781	0.122653	0.778486
ENSMUSG00000028864	Hgf	hepatocyte growth factor	25.6249	12.3535	1.99385	0.995557	0.122522	0.778486
ENSMUSG00000029447	Cct6a	chaperonin containing Tcp1, subunit 6a (zeta)	1375.15	979.921	1.40292	0.488432	0.122262	0.778486
ENSMUSG00000029650	Slc46a3	solute carrier family 46, member 3	321.806	225.258	1.42672	0.512699	0.122432	0.778486
ENSMUSG00000028158	Mttp	microsomal triglyceride transfer protein	283.267	192.545	1.46874	0.55458	0.123221	0.780225
ENSMUSG00000068180	AY512915	cDNA sequence AY512915	5.72687	0.331787	5.05101	2.33657	0.123244	0.780225
ENSMUSG00000069996	Gm7125	predicted pseudogene 7125	12.0196	3.13072	3.15189	1.65621	0.123729	0.781604
ENSMUSG00000038160	Atg5	autophagy related 5	439.1	305.491	1.43593	0.521986	0.124257	0.782465
ENSMUSG00000081262	Gm12261	predicted gene 12261	13.8247	4.09049	2.91223	1.54212	0.124358	0.782465
ENSMUSG00000037149	Ddx1	DEAD (Asp-Glu-Ala-Asp) box polypeptide 1	949.571	694.664	1.36642	0.450405	0.124086	0.782465
ENSMUSG00000091549	Gm6548	predicted gene 6548	485.626	338.152	1.43483	0.520881	0.12415	0.782465
ENSMUSG00000038298	Pdzk1	PDZ domain containing 1	4359.29	2577.58	1.69096	0.757846	0.124229	0.782465
ENSMUSG00000030615	Tmem126a	transmembrane protein 126A	179.557	116.781	1.53299	0.616349	0.124085	0.782465
ENSMUSG00000032077	Bud13	BUD13 homolog	218.966	142.466	1.53323	0.616577	0.123965	0.782465
ENSMUSG00000057113	Npm1	nucleophosmin 1	421.319	295.354	1.42505	0.511011	0.12477	0.78363
ENSMUSG00000038541	Srd5a2	steroid 5 alpha-reductase 2	32.839	14.4602	2.18878	1.13013	0.124884	0.784048
ENSMUSG00000065979	Cpped1	calcineurin-like phosphoesterase domain containing 1	798.047	577.096	1.3822	0.466971	0.125102	0.784701
ENSMUSG00000079297	Gm2223	predicted pseudogene 2223	746.399	528.314	1.41201	0.497754	0.125067	0.784701
ENSMUSG00000039114	Nrn1	neuritin 1	6.5209	0.887422	3.98475	1.99449	0.125254	0.785376
ENSMUSG00000036391	Sec24a	Sec24 related gene family, member A (S. cerevisiae)	864.307	618.104	1.39768	0.48303	0.12543	0.785398
ENSMUSG00000021932	Rnaseh2b	ribonuclease H2, subunit B	158.989	93.3811	1.69514	0.761401	0.125436	0.785398
ENSMUSG00000004865	Srpk1	serine/arginine-rich protein specific kinase 1	1246.97	906.734	1.37482	0.459244	0.125472	0.785398
ENSMUSG00000048572	Tmem252	transmembrane protein 252	876.21	532.505	1.64424	0.717421	0.125548	0.785559
ENSMUSG00000076755	Gm16602	T cell receptor gamma, variable 1	10.2555	1.32715	4.8366	2.27399	0.126098	0.785669
ENSMUSG00000076902	Traj27	T cell receptor alpha joining 27	5.19424	0.342692	4.6133	2.2058	0.126139	0.785669
ENSMUSG00000041565	L3mbtl4	l(3)mbt-like 4 (Drosophila)	3.68787	0	4.68787	2.22893	0.126044	0.785669
ENSMUSG00000034709	Ppp1r21	protein phosphatase 1, regulatory subunit 21	1026.71	734.667	1.39698	0.48231	0.125649	0.785669
ENSMUSG00000028459	Cd72	CD72 antigen	540.963	347.567	1.55483	0.63676	0.126112	0.785669
ENSMUSG00000029053	Prkcz	protein kinase C, zeta	477.677	345.066	1.38319	0.468004	0.125756	0.785669
ENSMUSG00000011837	Snapc2	small nuclear RNA activating complex, polypeptide 2	138.526	87.4325	1.57777	0.657889	0.125795	0.785669
ENSMUSG00000031641	Cbr4	carbonyl reductase 4	142.4	97.6074	1.45425	0.540274	0.125884	0.785669
ENSMUSG00000050921	P2ry10	purinergic receptor P2Y, G-protein coupled 10	409.476	122.951	3.31159	1.72752	0.126006	0.785669
ENSMUSG00000021886	Gpr65	G-protein coupled receptor 65	301.166	130.518	2.29752	1.20008	0.126269	0.785739
ENSMUSG00000028082	Sh3d19	SH3 domain protein D19	1359.05	890.779	1.5251	0.608902	0.126466	0.786004
ENSMUSG00000023452	Pisd	phosphatidylserine decarboxylase	168.553	114.696	1.4655	0.551393	0.126445	0.786004
ENSMUSG00000055717	Slain1	SLAIN motif family, member 1	123.595	59.2342	2.06851	1.04859	0.126534	0.786191
ENSMUSG00000020182	Ddc	dopa decarboxylase	362.051	230.117	1.57085	0.65155	0.126825	0.787182
ENSMUSG00000082100	Glns-ps1	glutamine synthetase pseudogene 1	504.964	322.951	1.56185	0.64326	0.126848	0.787182
ENSMUSG00000006818	Sod2	superoxide dismutase 2, mitochondrial	2612.72	1906.68	1.3701	0.454283	0.126736	0.787182
ENSMUSG00000043931	Gimap7	GTPase, IMAP family member 7	71.7611	20.0728	3.45284	1.78778	0.126798	0.787182
ENSMUSG00000007029	Vars	valyl-tRNA synthetase	639.012	460.415	1.38706	0.472034	0.127091	0.787733
ENSMUSG00000018858	Mrpl58	mitochondrial ribosomal protein L58	492.167	346.05	1.42103	0.506934	0.127175	0.788016
ENSMUSG00000026701	Prdx6	peroxiredoxin 6	1235.32	906.488	1.36235	0.446096	0.127238	0.788168
ENSMUSG00000026036	Nif3l1	Ngg1 interacting factor 3-like 1 (S. pombe)	171.628	118.978	1.43883	0.524899	0.127577	0.789572
ENSMUSG00000004929	Thop1	thimet oligopeptidase 1	207.925	141.67	1.4644	0.550307	0.128218	0.789719
ENSMUSG00000083061	Gm12191	predicted gene 12191	411.862	293.382	1.40247	0.48797	0.127997	0.789719
ENSMUSG00000076900	Traj29	T cell receptor alpha joining 29	5.73134	0.887422	3.56642	1.83448	0.128701	0.789719
ENSMUSG00000067148	Polr1c	polymerase (RNA) I polypeptide C	287.745	197.771	1.45265	0.538686	0.127855	0.789719
ENSMUSG00000036299	BC031181	cDNA sequence BC031181	835.184	591.772	1.41063	0.496342	0.128318	0.789719
ENSMUSG00000024953	Prdx5	peroxiredoxin 5	6061.53	4411.95	1.3738	0.458176	0.12844	0.789719
ENSMUSG00000028780	Sema3c	sema domain, immunoglobulin domain (Ig), short basic domain, secreted, (semaphorin) 3C	822.142	574.053	1.43142	0.517447	0.128666	0.789719
ENSMUSG00000029617	Ccz1	CCZ1 vacuolar protein trafficking and biogenesis associated	519.285	369.837	1.403	0.488517	0.128607	0.789719
ENSMUSG00000029700	Slc13a1	solute carrier family 13 (sodium/sulfate symporters), member 1	2821.19	1740.52	1.62054	0.696473	0.128173	0.789719
ENSMUSG00000035448	Ccr3	chemokine (C-C motif) receptor 3	4.03137	0	5.03137	2.33095	0.128726	0.789719
ENSMUSG00000021548	Ccnh	cyclin H	244.026	171.581	1.41977	0.505661	0.128767	0.789734
ENSMUSG00000086359	9630013K17Rik	RIKEN cDNA 9630013K17 gene	12.3428	3.36149	3.05922	1.61317	0.12887	0.790051
ENSMUSG00000055373	Fut9	fucosyltransferase 9	4744.32	3053.32	1.55364	0.635653	0.128944	0.790108
ENSMUSG00000028715	Cyp4a14	cytochrome P450, family 4, subfamily a, polypeptide 14	125.815	56.0721	2.22202	1.15187	0.129018	0.79032
ENSMUSG00000034424	Gcsh	glycine cleavage system protein H (aminomethyl carrier)	601.877	408.098	1.47368	0.559419	0.12906	0.790344
ENSMUSG00000079434	Neu2	neuraminidase 2	94.5042	61.0975	1.53797	0.62103	0.129583	0.790557
ENSMUSG00000019832	Rab32	RAB32, member RAS oncogene family	117.816	74.1858	1.5803	0.6602	0.129866	0.790557
ENSMUSG00000020224	Llph	LLP homolog, long-term synaptic facilitation (Aplysia)	83.3951	50.2492	1.64676	0.71963	0.130179	0.790557
ENSMUSG00000076891	Traj39	T cell receptor alpha joining 39	8.95963	0	9.95963	3.31609	0.130004	0.790557
ENSMUSG00000021983	Atp8a2	ATPase, aminophospholipid transporter-like, class I, type 8A, member 2	26.4439	10.244	2.44076	1.28733	0.129399	0.790557
ENSMUSG00000023830	Igf2r	insulin-like growth factor 2 receptor	3910.13	2866.83	1.3638	0.447627	0.129733	0.790557
ENSMUSG00000027076	Timm10	translocase of inner mitochondrial membrane 10	115.966	78.2118	1.47663	0.562307	0.12938	0.790557
ENSMUSG00000028152	Tspan5	tetraspanin 5	292.445	196.114	1.48871	0.574058	0.129433	0.790557
ENSMUSG00000056735	A930024E05Rik	RIKEN cDNA A930024E05 gene	44.5041	14.8562	2.86979	1.52095	0.129354	0.790557
ENSMUSG00000053063	Clec12a	C-type lectin domain family 12, member a	408.355	226.808	1.79693	0.845535	0.129984	0.790557
ENSMUSG00000031934	Panx1	pannexin 1	56.1724	26.0996	2.10972	1.07705	0.130058	0.790557
ENSMUSG00000031347	Cetn2	centrin 2	412.294	298.636	1.37932	0.463959	0.129431	0.790557
ENSMUSG00000030945	Acsm2	acyl-CoA synthetase medium-chain family member 2	27761.9	19217.6	1.44458	0.530651	0.130337	0.790579
ENSMUSG00000086942	Gm15489	predicted gene 15489	8.53206	1.66984	3.57027	1.83603	0.130333	0.790579
ENSMUSG00000056498	Tmem154	transmembrane protein 154	114.464	28.9846	3.85078	1.94515	0.130622	0.790894
ENSMUSG00000000958	Slc7a7	solute carrier family 7 (cationic amino acid transporter, y+ system), member 7	785.504	551.93	1.42243	0.508355	0.130758	0.791167
ENSMUSG00000074892	B3galt5	UDP-Gal:betaGlcNAc beta 1,3-galactosyltransferase, polypeptide 5	331.593	191.773	1.72531	0.786858	0.130968	0.791167
ENSMUSG00000078487	Ankrd65	ankyrin repeat domain 65	23.8051	9.29225	2.41008	1.26908	0.13092	0.791167
ENSMUSG00000031730	Dhodh	dihydroorotate dehydrogenase	141.277	91.348	1.54066	0.623549	0.130977	0.791167
ENSMUSG00000052446	Zfp961	zinc finger protein 961	174.912	114.526	1.5227	0.606633	0.131042	0.791328
ENSMUSG00000076896	Traj33	T cell receptor alpha joining 33	7.79677	0	8.79677	3.13697	0.131298	0.791438
ENSMUSG00000053168	9030619P08Rik	RIKEN cDNA 9030619P08 gene	16.4971	3.93893	3.54269	1.82484	0.131211	0.791438
ENSMUSG00000024354	Slc23a1	solute carrier family 23 (nucleobase transporters), member 1	864.638	565.213	1.52882	0.612418	0.131297	0.791438
ENSMUSG00000002781	Tmem143	transmembrane protein 143	291.967	200.164	1.45636	0.542363	0.131118	0.791438
ENSMUSG00000031119	Gpc4	glypican 4	2066.81	1490.9	1.38603	0.470959	0.131203	0.791438
ENSMUSG00000067714	Lpar5	lysophosphatidic acid receptor 5	29.1249	12.3317	2.25965	1.1761	0.131433	0.791817
ENSMUSG00000040771	Oard1	O-acyl-ADP-ribose deacylase 1	373.118	259.274	1.4374	0.523464	0.131565	0.792257
ENSMUSG00000053317	Sec61b	Sec61 beta subunit	176.181	121.106	1.45104	0.537089	0.131584	0.792257
ENSMUSG00000073491	Ifi213	interferon activated gene 213	218.392	96.2138	2.25679	1.17427	0.131634	0.792323
ENSMUSG00000066880	Zfp617	zinc finger protein 617	151.829	99.2196	1.52495	0.608758	0.131833	0.792589
ENSMUSG00000003762	Coq8b	coenzyme Q8B	152.063	99.7388	1.51941	0.603509	0.131883	0.792654
ENSMUSG00000019173	Rab5c	RAB5C, member RAS oncogene family	1977.94	1436.32	1.37683	0.461346	0.132043	0.792931
ENSMUSG00000074217	2210011C24Rik	RIKEN cDNA 2210011C24 gene	56.522	28.3411	1.96046	0.971191	0.13208	0.792931
ENSMUSG00000039264	Gimap3	GTPase, IMAP family member 3	373.829	123.944	2.99998	1.58495	0.132456	0.793991
ENSMUSG00000083829	Gm2199	predicted gene 2199	81.0983	46.7202	1.72041	0.782753	0.132836	0.79511
ENSMUSG00000020193	Zpbp	zona pellucida binding protein	15.1549	5.43939	2.50877	1.32698	0.133027	0.795352
ENSMUSG00000002233	Rhoc	ras homolog family member C	629.09	444.174	1.41538	0.501189	0.132991	0.795352
ENSMUSG00000028927	Padi2	peptidyl arginine deiminase, type II	298.583	97.5928	3.03859	1.6034	0.132935	0.795352
ENSMUSG00000032314	Etfa	electron transferring flavoprotein, alpha polypeptide	1131.1	816.189	1.38536	0.470265	0.133071	0.795352
ENSMUSG00000073008	Gpr174	G protein-coupled receptor 174	63.0357	11.7364	5.02776	2.32992	0.133226	0.795578
ENSMUSG00000046798	Cldn12	claudin 12	550.194	387.163	1.42001	0.505899	0.133483	0.796182
ENSMUSG00000020413	Hus1	HUS1 checkpoint clamp component	274.794	200.088	1.37151	0.455767	0.133605	0.79632
ENSMUSG00000020611	Gna13	guanine nucleotide binding protein, alpha 13	1319.34	935.969	1.40916	0.494831	0.13413	0.79632
ENSMUSG00000034158	Lrrc58	leucine rich repeat containing 58	2821.05	2058.95	1.36996	0.454132	0.133812	0.79632
ENSMUSG00000025732	Fam195a	family with sequence similarity 195, member A	482.201	321.775	1.49702	0.582095	0.134129	0.79632
ENSMUSG00000019232	Etnppl	ethanolamine phosphate phospholyase	58.1367	27.5982	2.06785	1.04813	0.133986	0.79632
ENSMUSG00000085351	Gm12472	predicted gene 12472	4.10989	0	5.10989	2.35329	0.134051	0.79632
ENSMUSG00000039753	Fbxl5	F-box and leucine-rich repeat protein 5	729.047	520.044	1.40113	0.486586	0.134114	0.79632
ENSMUSG00000003153	Slc2a3	solute carrier family 2 (facilitated glucose transporter), member 3	188.83	88.316	2.12538	1.08772	0.134113	0.79632
ENSMUSG00000076922	Traj6	T cell receptor alpha joining 6	13.0132	2.66226	3.82637	1.93598	0.134361	0.796578
ENSMUSG00000045629	Sh3tc2	SH3 domain and tetratricopeptide repeats 2	428.007	277.121	1.54252	0.625287	0.134352	0.796578
ENSMUSG00000048706	Lurap1l	leucine rich adaptor protein 1-like	115.642	78.3031	1.47084	0.556643	0.134369	0.796578
ENSMUSG00000047583	Tyw3	tRNA-yW synthesizing protein 3 homolog (S. cerevisiae)	174.225	114.527	1.51675	0.600979	0.134485	0.797035
ENSMUSG00000049109	Themis	thymocyte selection associated	171.041	23.8046	6.93585	2.79407	0.134796	0.797178
ENSMUSG00000027285	Haus2	HAUS augmin-like complex, subunit 2	90.6342	59.4443	1.51601	0.600279	0.134593	0.797178
ENSMUSG00000044867	Gimap1os	GTPase, IMAP family member 1, opposite strand	58.3002	16.6025	3.36885	1.75226	0.134899	0.797178
ENSMUSG00000033940	Brk1	BRICK1, SCAR/WAVE actin-nucleating complex subunit	343.868	249.447	1.37701	0.461536	0.134861	0.797178
ENSMUSG00000001604	Tcea3	transcription elongation factor A (SII), 3	928.669	608.054	1.52642	0.610147	0.135105	0.797677
ENSMUSG00000031242	2610002M06Rik	RIKEN cDNA 2610002M06 gene	191.751	134.528	1.42222	0.508145	0.135076	0.797677
ENSMUSG00000040648	Ppip5k2	diphosphoinositol pentakisphosphate kinase 2	637.808	455.374	1.39975	0.485166	0.135438	0.798278
ENSMUSG00000033618	Map3k13	mitogen-activated protein kinase kinase kinase 13	679.342	391.643	1.73273	0.793044	0.135312	0.798278
ENSMUSG00000092730	Snora24	small nucleolar RNA, H/ACA box 24	172.605	116.68	1.47523	0.560938	0.135486	0.798278
ENSMUSG00000083283	Gm15361	predicted pseudogene 15361	105.637	68.5036	1.53426	0.617544	0.135362	0.798278
ENSMUSG00000001323	Srr	serine racemase	623.611	445.19	1.39988	0.4853	0.135619	0.798293
ENSMUSG00000036534	Slc38a7	solute carrier family 38, member 7	210.53	141.039	1.48924	0.574579	0.135674	0.798293
ENSMUSG00000084013	Gm14270	predicted gene 14270	297.842	210.868	1.41051	0.49622	0.13583	0.798519
ENSMUSG00000039599	Fam149b	family with sequence similarity 149, member B	461.221	325.733	1.41467	0.500469	0.135988	0.798585
ENSMUSG00000022092	Ppp3cc	protein phosphatase 3, catalytic subunit, gamma isoform	213.788	134.042	1.59053	0.669508	0.136112	0.798585
ENSMUSG00000038900	Rpl12	ribosomal protein L12	79.7845	49.2596	1.60734	0.684679	0.135909	0.798585
ENSMUSG00000034226	Rhov	ras homolog family member V	37.1958	20.7772	1.75393	0.810595	0.136115	0.798585
ENSMUSG00000021606	Ndufs6	NADH dehydrogenase (ubiquinone) Fe-S protein 6	594.639	424.379	1.40026	0.48569	0.136257	0.79902
ENSMUSG00000025218	Poll	polymerase (DNA directed), lambda	99.7435	65.4571	1.51592	0.60019	0.136309	0.79902
ENSMUSG00000049744	Arhgap15	Rho GTPase activating protein 15	568.994	230.585	2.46127	1.2994	0.13627	0.79902
ENSMUSG00000055069	Rab39	RAB39, member RAS oncogene family	13.6209	4.35685	2.72939	1.44858	0.136387	0.799036
ENSMUSG00000025075	Habp2	hyaluronic acid binding protein 2	1598.54	1052.9	1.51773	0.601918	0.136449	0.799167
ENSMUSG00000075591	Gm10874	predicted gene 10874	11.6531	2.43443	3.68419	1.88135	0.136526	0.799171
ENSMUSG00000040525	Cblc	Casitas B-lineage lymphoma c	218.841	149.557	1.46018	0.546148	0.136636	0.799347
ENSMUSG00000004897	Hdgf	hepatoma-derived growth factor	2249.6	1663.54	1.35209	0.435188	0.136685	0.799405
ENSMUSG00000081926	Gm15536	predicted gene 15536	362.465	260.482	1.39002	0.475108	0.137121	0.799907
ENSMUSG00000001436	Slc19a1	solute carrier family 19 (folate transporter), member 1	456.295	320.55	1.42216	0.508083	0.136931	0.799907
ENSMUSG00000021807	2700060E02Rik	RIKEN cDNA 2700060E02 gene	404.92	290.917	1.39053	0.475635	0.13715	0.799907
ENSMUSG00000039157	Fam102a	family with sequence similarity 102, member A	1303.6	926.461	1.40664	0.492254	0.136989	0.799907
ENSMUSG00000027207	Galk2	galactokinase 2	537.108	373.525	1.43678	0.522835	0.137081	0.799907
ENSMUSG00000050188	Lsm10	U7 snRNP-specific Sm-like protein LSM10	41.9504	22.9877	1.79052	0.840376	0.13699	0.799907
ENSMUSG00000079495	Nat8f6	N-acetyltransferase 8 (GCN5-related) family member 6	227.639	77.2333	2.92253	1.54722	0.137099	0.799907
ENSMUSG00000006732	Mettl1	methyltransferase like 1	248.602	151.517	1.63656	0.710666	0.137528	0.800837
ENSMUSG00000074435	Smcp	sperm mitochondria-associated cysteine-rich protein	37.3802	14.4968	2.47665	1.30839	0.137557	0.800837
ENSMUSG00000042428	Mgat3	mannoside acetylglucosaminyltransferase 3	1179.23	777.063	1.51688	0.601108	0.137769	0.801064
ENSMUSG00000086478	Gm14102	predicted gene 14102	6.56314	0.685383	4.48749	2.16591	0.13792	0.80135
ENSMUSG00000085172	Gm6542	predicted gene 6542	559.043	401.798	1.39038	0.475482	0.138091	0.801432
ENSMUSG00000079227	Ccr5	chemokine (C-C motif) receptor 5	438.812	178.03	2.45664	1.29669	0.138051	0.801432
ENSMUSG00000023074	Mospd1	motile sperm domain containing 1	130.555	86.5283	1.503	0.587844	0.138087	0.801432
ENSMUSG00000019303	Psmc3ip	proteasome (prosome, macropain) 26S subunit, ATPase 3, interacting protein	56.8824	34.2368	1.64267	0.716041	0.138246	0.801874
ENSMUSG00000045594	Glb1	galactosidase, beta 1	578	415.237	1.39103	0.476158	0.138288	0.80189
ENSMUSG00000031634	Ufsp2	UFM1-specific peptidase 2	434.881	314.147	1.38311	0.467911	0.138401	0.802091
ENSMUSG00000032854	Ugt8a	UDP galactosyltransferase 8A	894.158	549.101	1.62726	0.702447	0.138486	0.802357
ENSMUSG00000024601	Isoc1	isochorismatase domain containing 1	459.265	322.121	1.42443	0.510389	0.138809	0.803054
ENSMUSG00000089844	A530032D15Rik	RIKEN cDNA A530032D15Rik gene	25.7584	8.68896	2.76174	1.46558	0.139369	0.803105
ENSMUSG00000022219	Cideb	cell death-inducing DNA fragmentation factor, alpha subunit-like effector B	105.199	64.4016	1.6238	0.699374	0.139214	0.803105
ENSMUSG00000084981	Gm15962	predicted gene 15962	62.7401	25.5461	2.40111	1.2637	0.139234	0.803105
ENSMUSG00000028932	Psmc2	proteasome (prosome, macropain) 26S subunit, ATPase 2	682.077	505.775	1.34789	0.430703	0.139096	0.803105
ENSMUSG00000049686	Orai1	ORAI calcium release-activated calcium modulator 1	203.4	140.141	1.44819	0.534255	0.139413	0.803105
ENSMUSG00000024437	Gm8615	predicted pseudogene 8615	271.885	164.665	1.64721	0.720024	0.139376	0.803105
ENSMUSG00000060419	Rps16-ps2	ribosomal protein S16, pseudogene 2	1357.41	983.072	1.3804	0.465086	0.139583	0.803692
ENSMUSG00000085965	2310016D23Rik	RIKEN cDNA 2310016D23 gene	3.55509	0	4.55509	2.18748	0.139729	0.804084
ENSMUSG00000076895	Traj34	T cell receptor alpha joining 34	4.91177	0.331787	4.43897	2.15023	0.140134	0.805283
ENSMUSG00000041362	Shtn1	shootin 1	530.946	382.172	1.38827	0.473288	0.140174	0.805283
ENSMUSG00000006315	Tmem147	transmembrane protein 147	253.829	163.961	1.54479	0.627406	0.140253	0.805283
ENSMUSG00000019883	Echdc1	enoyl Coenzyme A hydratase domain containing 1	173.005	120.527	1.43182	0.517852	0.140315	0.805414
ENSMUSG00000025395	Prim1	DNA primase, p49 subunit	63.8009	38.9999	1.62003	0.696018	0.140406	0.805709
ENSMUSG00000083268	Gm11511	predicted gene 11511	9.02504	2.66226	2.73739	1.4528	0.14051	0.805852
ENSMUSG00000028226	Mmp16	matrix metallopeptidase 16	88.0224	32.8346	2.63111	1.39567	0.14055	0.805857
ENSMUSG00000059475	Zfp426	zinc finger protein 426	270.656	185.631	1.45558	0.541591	0.140601	0.80592
ENSMUSG00000011382	Dhdh	dihydrodiol dehydrogenase (dimeric)	244.923	160.802	1.5199	0.603973	0.140849	0.806891
ENSMUSG00000031826	Usp10	ubiquitin specific peptidase 10	764.966	555.579	1.37621	0.460696	0.141018	0.807629
ENSMUSG00000031787	Katnb1	katanin p80 (WD40-containing) subunit B 1	259.229	187.171	1.38294	0.467741	0.141304	0.809039
ENSMUSG00000050107	Gsg2	germ cell associated 2, haspin	53.2944	31.9195	1.64931	0.721863	0.141447	0.809409
ENSMUSG00000042351	Grap2	GRB2-related adaptor protein 2	212.469	74.9609	2.81025	1.4907	0.141653	0.809905
ENSMUSG00000078503	Zfp990	zinc finger protein 990	70.1191	32.554	2.11954	1.08375	0.141583	0.809905
ENSMUSG00000080904	Gm11966	predicted gene 11966	382.211	270.262	1.41269	0.498449	0.14182	0.81017
ENSMUSG00000062083	Rpl13a-ps1	ribosomal protein 13A, pseudogene 1	88.8456	56.7512	1.55574	0.637597	0.141788	0.81017
ENSMUSG00000022336	Eif3e	eukaryotic translation initiation factor 3, subunit E	541.685	401.515	1.34824	0.431073	0.141919	0.810184
ENSMUSG00000058979	Cecr5	cat eye syndrome chromosome region, candidate 5	199.677	137.762	1.44619	0.532256	0.141991	0.810184
ENSMUSG00000004264	Phb2	prohibitin 2	905.535	653.326	1.38545	0.470353	0.142064	0.810184
ENSMUSG00000026167	Wnt10a	wingless-type MMTV integration site family, member 10A	12.2256	3.36547	3.02959	1.59912	0.142426	0.81063
ENSMUSG00000016940	Kctd2	potassium channel tetramerisation domain containing 2	407.161	284.725	1.42851	0.51451	0.143027	0.81063
ENSMUSG00000054589	Gm9949	predicted gene 9949	30.8734	17.0254	1.76825	0.822319	0.142846	0.81063
ENSMUSG00000024558	Mapk4	mitogen-activated protein kinase 4	589.694	423.483	1.39156	0.476705	0.142923	0.81063
ENSMUSG00000041660	Bbox1	butyrobetaine (gamma), 2-oxoglutarate dioxygenase 1 (gamma-butyrobetaine hydroxylase)	39.8958	22.7926	1.71885	0.78144	0.142423	0.81063
ENSMUSG00000027332	Ivd	isovaleryl coenzyme A dehydrogenase	3042.25	2250.5	1.35166	0.434727	0.143204	0.81063
ENSMUSG00000027605	Acss2	acyl-CoA synthetase short-chain family member 2	1133.8	639.663	1.77129	0.8248	0.142482	0.81063
ENSMUSG00000028551	Cdkn2c	cyclin-dependent kinase inhibitor 2C (p18, inhibits CDK4)	89.698	56.4652	1.57831	0.658382	0.143086	0.81063
ENSMUSG00000033985	Tesk2	testis-specific kinase 2	161.082	106.971	1.50116	0.586082	0.142383	0.81063
ENSMUSG00000092464	Gm8902	predicted gene 8902	10.5729	2.77021	3.06957	1.61804	0.14295	0.81063
ENSMUSG00000091460	Gm7808	predicted pseudogene 7808	30.1591	14.0245	2.07389	1.05234	0.142817	0.81063
ENSMUSG00000032269	Htr3a	5-hydroxytryptamine (serotonin) receptor 3A	12.6098	3.78738	2.84286	1.50734	0.142759	0.81063
ENSMUSG00000085711	Gm15163	predicted gene 15163	1342.16	992.742	1.35162	0.434693	0.142766	0.81063
ENSMUSG00000085853	Gm12167	predicted gene 12167	18.462	2.99405	4.87276	2.28474	0.143498	0.811142
ENSMUSG00000021893	Capn7	calpain 7	859.648	620.134	1.38561	0.470519	0.143486	0.811142
ENSMUSG00000026492	Tfb2m	transcription factor B2, mitochondrial	186.59	129.838	1.43376	0.519804	0.143591	0.811217
ENSMUSG00000028710	Atpaf1	ATP synthase mitochondrial F1 complex assembly factor 1	102.749	67.034	1.52495	0.608765	0.143577	0.811217
ENSMUSG00000057982	Zfp809	zinc finger protein 809	325.682	234.113	1.38946	0.474529	0.143719	0.811493
ENSMUSG00000025909	Sntg1	syntrophin, gamma 1	6.38343	0.674479	4.40939	2.14058	0.143863	0.811635
ENSMUSG00000015846	Rxra	retinoid X receptor alpha	1481.33	1088.62	1.36041	0.444045	0.144252	0.812681
ENSMUSG00000063646	Jakmip1	janus kinase and microtubule interacting protein 1	173.544	51.1758	3.34531	1.74214	0.144218	0.812681
ENSMUSG00000015357	Clpx	caseinolytic mitochondrial matrix peptidase chaperone subunit	1318.98	987.554	1.33527	0.417128	0.144447	0.812681
ENSMUSG00000079362	Gm43302	predicted gene 43302	87.405	57.0146	1.52384	0.607711	0.144845	0.813727
ENSMUSG00000003662	Ciao1	cytosolic iron-sulfur protein assembly 1	525.669	366.619	1.43265	0.518684	0.144944	0.813748
ENSMUSG00000070572	Trmt112-ps2	tRNA methyltransferase 11-2, pseudogene 2	263.585	187.575	1.40308	0.488596	0.145276	0.814432
ENSMUSG00000084772	Gm15473	predicted gene 15473	3.57726	0	4.57726	2.19448	0.145232	0.814432
ENSMUSG00000054226	Tprkb	Tp53rk binding protein	763.149	418.542	1.82139	0.865038	0.145348	0.81461
ENSMUSG00000028601	Echdc2	enoyl Coenzyme A hydratase domain containing 2	784.434	533.198	1.47031	0.556116	0.145393	0.814642
ENSMUSG00000020901	Pik3r5	phosphoinositide-3-kinase, regulatory subunit 5, p101	423.658	252.539	1.67492	0.744091	0.145599	0.8149
ENSMUSG00000072568	Fam84b	family with sequence similarity 84, member B	575.886	427.121	1.34748	0.430269	0.145495	0.8149
ENSMUSG00000070493	Chchd2	coiled-coil-helix-coiled-coil-helix domain containing 2	761.713	562.022	1.35468	0.437947	0.14556	0.8149
ENSMUSG00000020009	Ifngr1	interferon gamma receptor 1	1674.78	900.939	1.85797	0.893731	0.145642	0.814918
ENSMUSG00000018774	Cd68	CD68 antigen	446.277	314.146	1.41927	0.50515	0.146058	0.815135
ENSMUSG00000017950	Hnf4a	hepatic nuclear factor 4, alpha	9352.9	5114.37	1.82859	0.87073	0.146077	0.815135
ENSMUSG00000036632	Alg5	asparagine-linked glycosylation 5 (dolichyl-phosphate beta-glucosyltransferase)	211.228	139.462	1.51094	0.595442	0.145918	0.815135
ENSMUSG00000062353	Gm15772	predicted gene 15772	2913.64	2018.83	1.44302	0.529086	0.145997	0.815135
ENSMUSG00000037103	Dcaf15	DDB1 and CUL4 associated factor 15	189.23	130.634	1.44514	0.531213	0.146153	0.815135
ENSMUSG00000019810	Fuca2	fucosidase, alpha-L- 2, plasma	2469.4	1804.77	1.36806	0.45213	0.146983	0.816982
ENSMUSG00000035385	Ccl2	chemokine (C-C motif) ligand 2	213.631	141.649	1.50461	0.589391	0.147011	0.816982
ENSMUSG00000026003	Acadl	acyl-Coenzyme A dehydrogenase, long-chain	2985.4	2197.63	1.3583	0.441803	0.14732	0.81743
ENSMUSG00000034833	Tespa1	thymocyte expressed, positive selection associated 1	111.456	30.0998	3.61596	1.85438	0.147183	0.81743
ENSMUSG00000076917	Traj12	T cell receptor alpha joining 12	21.9118	3.76557	4.80778	2.26537	0.147321	0.81743
ENSMUSG00000030359	Pzp	pregnancy zone protein	1175.93	664.196	1.7693	0.823176	0.147372	0.81743
ENSMUSG00000015316	Slamf1	signaling lymphocytic activation molecule family member 1	51.7782	15.2822	3.24147	1.69665	0.147472	0.817487
ENSMUSG00000029499	Pxmp2	peroxisomal membrane protein 2	95.8501	66.2675	1.43978	0.525845	0.147488	0.817487
ENSMUSG00000028133	Rwdd3	RWD domain containing 3	54.4492	33.2466	1.61912	0.695206	0.14761	0.817659
ENSMUSG00000026029	Casp8	caspase 8	695.095	509.01	1.36487	0.448758	0.14775	0.817684
ENSMUSG00000064917	Gm22574	predicted gene, 22574	3.53501	0	4.53501	2.18111	0.147818	0.817684
ENSMUSG00000090231	Cfb	complement factor B	69.3402	40.1837	1.70796	0.772275	0.147809	0.817684
ENSMUSG00000028568	Btf3l4	basic transcription factor 3-like 4	126.853	86.6879	1.45805	0.544041	0.147757	0.817684
ENSMUSG00000036918	Ttc7	tetratricopeptide repeat domain 7	950.299	685.745	1.38523	0.470124	0.147935	0.817799
ENSMUSG00000085272	Sbk3	SH3 domain binding kinase family, member 3	6.54644	0.685383	4.47758	2.16272	0.147959	0.817799
ENSMUSG00000036832	Lpar3	lysophosphatidic acid receptor 3	203.268	144.327	1.40557	0.491159	0.148226	0.818083
ENSMUSG00000030108	Slc6a13	solute carrier family 6 (neurotransmitter transporter, GABA), member 13	321.494	210.889	1.522	0.605964	0.148182	0.818083
ENSMUSG00000019082	Slc25a22	solute carrier family 25 (mitochondrial carrier, glutamate), member 22	207.496	148.166	1.39775	0.483105	0.148251	0.818083
ENSMUSG00000022762	Ncam2	neural cell adhesion molecule 2	50.8323	29.48	1.70054	0.765989	0.148418	0.818344
ENSMUSG00000004462	Tbccd1	TBCC domain containing 1	229.997	154.182	1.48855	0.573911	0.149182	0.819705
ENSMUSG00000024507	Hsd17b4	hydroxysteroid (17-beta) dehydrogenase 4	2142.8	1610.97	1.32992	0.411344	0.149071	0.819705
ENSMUSG00000054312	Mrps21	mitochondrial ribosomal protein S21	384.35	273.669	1.40296	0.488473	0.149361	0.819705
ENSMUSG00000027882	Stxbp3	syntaxin binding protein 3	393.487	279.468	1.40653	0.492143	0.148914	0.819705
ENSMUSG00000093398	Vmn1r-ps11	vomeronasal 1 receptor, pseudogene 11	17.6985	7.75902	2.13477	1.09408	0.14945	0.819705
ENSMUSG00000055093	Gm8430	predicted pseudogene 8430	439.453	314.603	1.39559	0.480876	0.149117	0.819705
ENSMUSG00000030165	Klrd1	killer cell lectin-like receptor, subfamily D, member 1	110.191	26.451	4.05054	2.01811	0.14949	0.819705
ENSMUSG00000030283	St8sia1	ST8 alpha-N-acetyl-neuraminide alpha-2,8-sialyltransferase 1	1462.45	946.931	1.54384	0.626524	0.14948	0.819705
ENSMUSG00000030603	Psmc4	proteasome (prosome, macropain) 26S subunit, ATPase, 4	847.585	616.218	1.37485	0.459278	0.149389	0.819705
ENSMUSG00000079427	Mthfsl	5, 10-methenyltetrahydrofolate synthetase-like	76.3678	49.6597	1.5272	0.610893	0.148964	0.819705
ENSMUSG00000025794	Rpl14	ribosomal protein L14	743.039	540.124	1.37499	0.459418	0.149508	0.819705
ENSMUSG00000003438	Timm50	translocase of inner mitochondrial membrane 50	200.661	138.283	1.44785	0.53391	0.149762	0.820074
ENSMUSG00000015401	Tmem27	transmembrane protein 27	6068.42	4335.57	1.39959	0.485005	0.149745	0.820074
ENSMUSG00000032673	Prorsd1	prolyl-tRNA synthetase domain containing 1	179.071	122.694	1.45578	0.541793	0.149817	0.820079
ENSMUSG00000060216	Arrb2	arrestin, beta 2	598.641	356.741	1.67619	0.745184	0.150228	0.820471
ENSMUSG00000004789	Dlst	dihydrolipoamide S-succinyltransferase (E2 component of 2-oxo-glutarate complex)	3290.67	2470.19	1.33202	0.413618	0.150491	0.820471
ENSMUSG00000021587	Pcsk1	proprotein convertase subtilisin/kexin type 1	3.49744	0	4.49744	2.16911	0.150172	0.820471
ENSMUSG00000034371	Tkfc	triokinase, FMN cyclase	2124.52	1271.43	1.67044	0.740226	0.150108	0.820471
ENSMUSG00000039982	Dtx4	deltex 4, E3 ubiquitin ligase	378.416	270.212	1.39896	0.484359	0.150359	0.820471
ENSMUSG00000027287	Snap23	synaptosomal-associated protein 23	1382.96	1021.86	1.35303	0.436197	0.150052	0.820471
ENSMUSG00000066097	Cyp2j11	cytochrome P450, family 2, subfamily j, polypeptide 11	865.609	615.9	1.40478	0.490346	0.150373	0.820471
ENSMUSG00000076498	Trbc2	T cell receptor beta, constant 2	69.2967	19.6142	3.41011	1.76982	0.150412	0.820471
ENSMUSG00000089929	Bcl2a1b	B cell leukemia/lymphoma 2 related protein A1b	33.9216	17.2769	1.9107	0.934099	0.150817	0.820931
ENSMUSG00000032643	Fhl3	four and a half LIM domains 3	89.9916	59.6523	1.50022	0.585172	0.151171	0.82179
ENSMUSG00000050855	Zfp940	zinc finger protein 940	43.574	25.0548	1.71078	0.774653	0.151272	0.821876
ENSMUSG00000038567	Cyp24a1	cytochrome P450, family 24, subfamily a, polypeptide 1	1915.97	994.491	1.92566	0.94535	0.151389	0.822074
ENSMUSG00000032300	1700017B05Rik	RIKEN cDNA 1700017B05 gene	319.4	219.869	1.45063	0.53668	0.151359	0.822074
ENSMUSG00000005813	Metap1	methionyl aminopeptidase 1	399.67	296.167	1.3483	0.43114	0.151621	0.822938
ENSMUSG00000031434	Morc4	microrchidia 4	296.138	199.603	1.48123	0.566792	0.151629	0.822938
ENSMUSG00000062939	Stat4	signal transducer and activator of transcription 4	242.4	68.4476	3.50479	1.80933	0.151851	0.823123
ENSMUSG00000019850	Tnfaip3	tumor necrosis factor, alpha-induced protein 3	5268.56	2291.88	2.29823	1.20052	0.151976	0.823123
ENSMUSG00000027698	Nceh1	neutral cholesterol ester hydrolase 1	1641.96	1206.13	1.36106	0.444726	0.15176	0.823123
ENSMUSG00000028719	Cmpk1	cytidine monophosphate (UMP-CMP) kinase 1	571.559	419.729	1.36087	0.444534	0.151967	0.823123
ENSMUSG00000033027	Klrc3	killer cell lectin-like receptor subfamily C, member 3	8.2475	1.21921	4.16703	2.05902	0.151949	0.823123
ENSMUSG00000076909	Traj20	T cell receptor alpha joining 20	8.1679	1.66984	3.43387	1.77984	0.152333	0.824569
ENSMUSG00000078126	Rpl23a-ps3	ribosomal protein L23A, pseudogene 3	559.397	400.392	1.39614	0.481439	0.152812	0.825632
ENSMUSG00000041954	Tnfrsf18	tumor necrosis factor receptor superfamily, member 18	77.202	34.6589	2.19306	1.13295	0.152767	0.825632
ENSMUSG00000068011	Mkrn2os	makorin, ring finger protein 2, opposite strand	56.3618	34.8878	1.59837	0.676598	0.152718	0.825632
ENSMUSG00000057531	Dtnbp1	dystrobrevin binding protein 1	745.773	550.916	1.35305	0.43622	0.152946	0.825707
ENSMUSG00000021612	Slc6a18	solute carrier family 6 (neurotransmitter transporter), member 18	2165.4	1304.94	1.65888	0.730212	0.152938	0.825707
ENSMUSG00000058655	Eif4b	eukaryotic translation initiation factor 4B	4004.09	2972.5	1.34693	0.429675	0.152948	0.825707
ENSMUSG00000030747	Dgat2	diacylglycerol O-acyltransferase 2	707.241	492.422	1.43537	0.521418	0.153008	0.825813
ENSMUSG00000019373	Cops3	COP9 signalosome subunit 3	318.355	229.965	1.3827	0.467489	0.153125	0.82623
ENSMUSG00000023216	Epb42	erythrocyte membrane protein band 4.2	11.2697	3.69726	2.61209	1.3852	0.153309	0.826784
ENSMUSG00000068874	Selenbp1	selenium binding protein 1	1613.58	1121.05	1.43895	0.525015	0.153306	0.826784
ENSMUSG00000080902	Gm11226	predicted gene 11226	26.9859	13.1973	1.97121	0.979084	0.153391	0.826788
ENSMUSG00000020605	Hs1bp3	HCLS1 binding protein 3	190.617	132.939	1.43063	0.516649	0.153447	0.826872
ENSMUSG00000026080	Chst10	carbohydrate sulfotransferase 10	36.2045	11.4236	2.99467	1.5824	0.153806	0.827004
ENSMUSG00000076488	Trbj1-6	T cell receptor beta joining 1-6	3.33912	0	4.33912	2.1174	0.15377	0.827004
ENSMUSG00000004612	Nkg7	natural killer cell group 7 sequence	115.919	33.6742	3.37194	1.75358	0.153759	0.827004
ENSMUSG00000079139	Gm4204	predicted gene 4204	1220	923.66	1.32049	0.401071	0.154705	0.827606
ENSMUSG00000078812	Eif5a	eukaryotic translation initiation factor 5A	2272.06	1699.07	1.33704	0.419043	0.154639	0.827606
ENSMUSG00000062082	Cd200r4	CD200 receptor 4	37.6832	8.63045	4.01675	2.00603	0.154718	0.827606
ENSMUSG00000024885	Aldh3b1	aldehyde dehydrogenase 3 family, member B1	121.201	80.8387	1.49319	0.578396	0.154686	0.827606
ENSMUSG00000027347	Rasgrp1	RAS guanyl releasing protein 1	514.55	251.042	2.04549	1.03245	0.154476	0.827606
ENSMUSG00000087938	Gm26049	predicted gene, 26049	10.4448	2.77713	3.03004	1.59933	0.15469	0.827606
ENSMUSG00000038459	Abhd17c	abhydrolase domain containing 17C	820.774	625.001	1.31273	0.392575	0.154638	0.827606
ENSMUSG00000085354	Gm2044	predicted gene 2044	13.3864	4.2271	2.75227	1.46062	0.154341	0.827606
ENSMUSG00000005951	Shpk	sedoheptulokinase	143.335	96.0852	1.48669	0.572099	0.155097	0.829198
ENSMUSG00000040498	Igsf23	immunoglobulin superfamily, member 23	9.53004	2.77021	2.79296	1.4818	0.155194	0.829289
ENSMUSG00000050830	Vwc2	von Willebrand factor C domain containing 2	3.41763	0	4.41763	2.14327	0.155349	0.829358
ENSMUSG00000020732	Rab37	RAB37, member RAS oncogene family	45.4918	12.2277	3.51472	1.81341	0.155573	0.829358
ENSMUSG00000001542	Ell2	elongation factor RNA polymerase II 2	662.584	487.605	1.35812	0.44161	0.155357	0.829358
ENSMUSG00000040037	Negr1	neuronal growth regulator 1	18.9328	7.98575	2.21826	1.14943	0.155552	0.829358
ENSMUSG00000003477	Inmt	indolethylamine N-methyltransferase	3075.5	1885.83	1.63051	0.705323	0.155525	0.829358
ENSMUSG00000027344	Fsip1	fibrous sheath-interacting protein 1	7.6449	1.5728	3.36011	1.74851	0.155781	0.829656
ENSMUSG00000044408	Sptssa	serine palmitoyltransferase, small subunit A	214.405	153.193	1.39699	0.48232	0.156069	0.830053
ENSMUSG00000045316	Fahd1	fumarylacetoacetate hydrolase domain containing 1	638.253	404.95	1.57471	0.655087	0.156058	0.830053
ENSMUSG00000053436	Mapk14	mitogen-activated protein kinase 14	1375.55	1010.77	1.36053	0.444174	0.15605	0.830053
ENSMUSG00000045817	Zfp36l2	zinc finger protein 36, C3H type-like 2	3179.7	2032.88	1.56386	0.645108	0.156052	0.830053
ENSMUSG00000049751	Rpl36al	ribosomal protein L36A-like	512.242	367.622	1.39233	0.477499	0.156129	0.830056
ENSMUSG00000024528	Srfbp1	serum response factor binding protein 1	177.159	119.039	1.48418	0.569662	0.156259	0.830199
ENSMUSG00000089914	4930486I03Rik	RIKEN cDNA 4930486I03 gene	3.65915	0	4.65915	2.22007	0.15752	0.830551
ENSMUSG00000026112	Coa5	cytochrome C oxidase assembly factor 5	906.335	674.526	1.34315	0.425623	0.158562	0.830551
ENSMUSG00000026634	Angel2	angel homolog 2 (Drosophila)	448.851	328.401	1.36566	0.4496	0.157566	0.830551
ENSMUSG00000038624	Nepn	nephrocan	132.482	82.472	1.59912	0.677278	0.157211	0.830551
ENSMUSG00000044475	Ascc1	activating signal cointegrator 1 complex subunit 1	469.852	336.865	1.39361	0.478826	0.157629	0.830551
ENSMUSG00000017286	Glod4	glyoxalase domain containing 4	897.138	647.005	1.38601	0.470933	0.157443	0.830551
ENSMUSG00000018168	Ikzf3	IKAROS family zinc finger 3	649.41	196.499	3.29324	1.71951	0.156792	0.830551
ENSMUSG00000046352	Gjb2	gap junction protein, beta 2	831.54	530.834	1.56542	0.646545	0.157842	0.830551
ENSMUSG00000024911	Fibp	fibroblast growth factor (acidic) intracellular binding protein	159.375	106.755	1.48833	0.573696	0.157522	0.830551
ENSMUSG00000039097	Rln1	relaxin 1	3.38006	0	4.38006	2.13095	0.157872	0.830551
ENSMUSG00000062456	Rpl9-ps6	ribosomal protein L9, pseudogene 6	862.841	627.242	1.37501	0.459445	0.157357	0.830551
ENSMUSG00000050592	Fam78a	family with sequence similarity 78, member A	140.31	81.7169	1.70836	0.772615	0.15873	0.830551
ENSMUSG00000027184	Caprin1	cell cycle associated protein 1	4682.93	3497.77	1.33874	0.420871	0.15794	0.830551
ENSMUSG00000027692	Tnik	TRAF2 and NCK interacting kinase	313.153	107.382	2.89858	1.53535	0.157068	0.830551
ENSMUSG00000037096	Gm9762	predicted pseudogene 9762	202.391	138.524	1.45775	0.543747	0.157277	0.830551
ENSMUSG00000084760	Gm15472	predicted gene 15472	120.637	31.8806	3.69934	1.88727	0.158605	0.830551
ENSMUSG00000028182	Lrriq3	leucine-rich repeats and IQ motif containing 3	33.776	18.2595	1.80566	0.852524	0.158694	0.830551
ENSMUSG00000043753	Dmrta1	doublesex and mab-3 related transcription factor like family A1	14.6137	3.20993	3.70877	1.89094	0.156942	0.830551
ENSMUSG00000083836	Ldha-ps2	lactate dehydrogenase A, pseudogene 2	118.186	84.8498	1.38831	0.473326	0.157899	0.830551
ENSMUSG00000082575	Gm13050	predicted gene 13050	527.813	384.205	1.37281	0.457132	0.158328	0.830551
ENSMUSG00000029649	Pomp	proteasome maturation protein	536.903	395.611	1.35625	0.439623	0.156432	0.830551
ENSMUSG00000029822	Osbpl3	oxysterol binding protein-like 3	2004.73	1403.1	1.42849	0.514488	0.15711	0.830551
ENSMUSG00000030061	Uba3	ubiquitin-like modifier activating enzyme 3	424.01	299.888	1.41252	0.49827	0.158112	0.830551
ENSMUSG00000032712	2810474O19Rik	RIKEN cDNA 2810474O19 gene	1704.48	1243.48	1.37044	0.454641	0.156886	0.830551
ENSMUSG00000031497	Tnfsf13b	tumor necrosis factor (ligand) superfamily, member 13b	37.0853	15.316	2.33423	1.22295	0.156959	0.830551
ENSMUSG00000003299	Mrpl4	mitochondrial ribosomal protein L4	458.587	331.852	1.38076	0.465458	0.158172	0.830551
ENSMUSG00000052336	Cx3cr1	chemokine (C-X3-C motif) receptor 1	572.085	279.293	2.04459	1.03181	0.157394	0.830551
ENSMUSG00000061536	Sec22c	SEC22 homolog C, vesicle trafficking protein	93.5416	59.3135	1.5675	0.648468	0.157829	0.830551
ENSMUSG00000086241	4930483K19Rik	RIKEN cDNA 4930483K19 gene	8.26858	1.9155	3.17907	1.66861	0.158894	0.831009
ENSMUSG00000003135	Cnot11	CCR4-NOT transcription complex, subunit 11	371.296	258.904	1.43243	0.518469	0.159906	0.831326
ENSMUSG00000089782	Gm3531	predicted pseudogene 3531	575.656	422.581	1.36138	0.445073	0.160091	0.831326
ENSMUSG00000033544	Angptl1	angiopoietin-like 1	27.9326	12.8517	2.08874	1.06264	0.159605	0.831326
ENSMUSG00000025422	Agap2	ArfGAP with GTPase domain, ankyrin repeat and PH domain 2	212.817	74.7985	2.82086	1.49613	0.159527	0.831326
ENSMUSG00000025347	Mettl7b	methyltransferase like 7B	1320.65	779.131	1.69413	0.760547	0.160029	0.831326
ENSMUSG00000076875	Traj58	T cell receptor alpha joining 58	3.62159	0	4.62159	2.20839	0.159743	0.831326
ENSMUSG00000027424	Mgme1	mitochondrial genome maintainance exonuclease 1	238.684	170.051	1.40124	0.486708	0.159377	0.831326
ENSMUSG00000068130	Zfp442	zinc finger protein 442	70.7618	39.9409	1.75282	0.809675	0.160136	0.831326
ENSMUSG00000028487	Bnc2	basonuclin 2	1556.14	922.881	1.68543	0.753119	0.160021	0.831326
ENSMUSG00000057103	Nat8f1	N-acetyltransferase 8 (GCN5-related) family member 1	679.881	441.581	1.53843	0.621462	0.159128	0.831326
ENSMUSG00000032370	Lactb	lactamase, beta	521.675	396.155	1.31605	0.396211	0.159493	0.831326
ENSMUSG00000015970	Chdh	choline dehydrogenase	4859.13	3520.98	1.37994	0.464609	0.160392	0.832027
ENSMUSG00000028737	Aldh4a1	aldehyde dehydrogenase 4 family, member A1	3127.89	2185.99	1.43069	0.516707	0.160385	0.832027
ENSMUSG00000049881	2810025M15Rik	RIKEN cDNA 2810025M15 gene	98.957	63.4614	1.55065	0.632871	0.160669	0.832619
ENSMUSG00000017868	Sgk2	serum/glucocorticoid regulated kinase 2	1486.94	1032.78	1.43932	0.525392	0.160643	0.832619
ENSMUSG00000046082	Tmem174	transmembrane protein 174	1938.54	1412.91	1.37176	0.456023	0.160831	0.83296
ENSMUSG00000053862	Slc51b	solute carrier family 51, beta subunit	135.113	95.7566	1.40676	0.492376	0.160939	0.83296
ENSMUSG00000024955	Esrra	estrogen related receptor, alpha	531.818	387.064	1.37302	0.45735	0.161041	0.833023
ENSMUSG00000062937	Mtap	methylthioadenosine phosphorylase	371.197	277.165	1.33804	0.420126	0.161074	0.833023
ENSMUSG00000037940	Inpp4b	inositol polyphosphate-4-phosphatase, type II	720.907	272.293	2.64151	1.40136	0.161065	0.833023
ENSMUSG00000021496	Pcbd2	pterin 4 alpha carbinolamine dehydratase/dimerization cofactor of hepatocyte nuclear factor 1 alpha (TCF1) 2	64.736	41.4682	1.54789	0.630299	0.161269	0.833189
ENSMUSG00000028834	Trim63	tripartite motif-containing 63	80.282	38.7378	2.04546	1.03242	0.161683	0.834062
ENSMUSG00000003037	Rab8a	RAB8A, member RAS oncogene family	1081.93	802.492	1.34778	0.430589	0.161881	0.834872
ENSMUSG00000032469	Dbr1	debranching RNA lariats 1	179.441	123.641	1.44769	0.533751	0.162054	0.835556
ENSMUSG00000040345	Arhgap9	Rho GTPase activating protein 9	218.997	83.43	2.60568	1.38166	0.162137	0.835558
ENSMUSG00000034255	Arhgap27	Rho GTPase activating protein 27	556.516	394.526	1.40956	0.495243	0.162125	0.835558
ENSMUSG00000027709	Mccc1	methylcrotonoyl-Coenzyme A carboxylase 1 (alpha)	1597.77	1187.4	1.34531	0.42794	0.16228	0.836067
ENSMUSG00000027282	Mtch2	mitochondrial carrier 2	644.265	474.834	1.35607	0.439433	0.162437	0.836072
ENSMUSG00000022722	Arl6	ADP-ribosylation factor-like 6	150.906	104.625	1.43817	0.524232	0.162829	0.836385
ENSMUSG00000053347	Zfp943	zinc finger prtoein 943	227.869	167.091	1.36158	0.445277	0.162809	0.836385
ENSMUSG00000051735	Rinl	Ras and Rab interactor-like	316.038	122.796	2.56098	1.3567	0.162733	0.836385
ENSMUSG00000015217	Hmgb3	high mobility group box 3	58.0795	35.2414	1.63016	0.705017	0.162815	0.836385
ENSMUSG00000053914	Kdm4d	lysine (K)-specific demethylase 4D	10.1947	2.65828	3.06009	1.61357	0.162975	0.836711
ENSMUSG00000057236	Rbbp4	retinoblastoma binding protein 4	1418.76	1055.67	1.34362	0.426121	0.163173	0.837219
ENSMUSG00000037257	Aagab	alpha- and gamma-adaptin binding protein	511.363	371.278	1.37629	0.460784	0.163202	0.837219
ENSMUSG00000025260	Hsd17b10	hydroxysteroid (17-beta) dehydrogenase 10	466.519	337.535	1.38101	0.465722	0.163276	0.837219
ENSMUSG00000018446	C1qbp	complement component 1, q subcomponent binding protein	825.727	617.843	1.33592	0.417838	0.16381	0.837484
ENSMUSG00000039640	Mrpl12	mitochondrial ribosomal protein L12	722.488	530.873	1.36027	0.443889	0.164348	0.837484
ENSMUSG00000020652	Cenpo	centromere protein O	75.9603	50.578	1.49211	0.577357	0.16398	0.837484
ENSMUSG00000021051	Ppp2r5e	protein phosphatase 2, regulatory subunit B', epsilon	1446.3	1102.41	1.31167	0.391401	0.164479	0.837484
ENSMUSG00000046573	Lyrm4	LYR motif containing 4	171.468	121.977	1.40244	0.487942	0.163491	0.837484
ENSMUSG00000022389	Tef	thyrotroph embryonic factor	2813.9	1910.91	1.47229	0.558066	0.164466	0.837484
ENSMUSG00000024158	Hagh	hydroxyacyl glutathione hydrolase	812.15	613.698	1.32284	0.403644	0.164234	0.837484
ENSMUSG00000043346	Gm6741	predicted gene 6741	23.092	10.2073	2.14967	1.10412	0.164455	0.837484
ENSMUSG00000057766	Ankrd29	ankyrin repeat domain 29	171.951	121.923	1.40699	0.492614	0.164076	0.837484
ENSMUSG00000043833	2900005J15Rik	RIKEN cDNA 2900005J15 gene	37.8629	20.2147	1.83189	0.873334	0.164453	0.837484
ENSMUSG00000076494	Trbj2-3	T cell receptor beta joining 2-3	3.40223	0	4.40223	2.13823	0.164362	0.837484
ENSMUSG00000058446	Znrf2	zinc and ring finger 2	1301.26	974.342	1.33519	0.417041	0.163756	0.837484
ENSMUSG00000030157	Clec2d	C-type lectin domain family 2, member d	1126.08	821.884	1.36967	0.45383	0.164152	0.837484
ENSMUSG00000005142	Man2b1	mannosidase 2, alpha B1	1760.4	1306.99	1.34665	0.429373	0.164263	0.837484
ENSMUSG00000056131	Pgm3	phosphoglucomutase 3	254.247	179.696	1.41258	0.498329	0.163836	0.837484
ENSMUSG00000060730	Gm10086	predicted pseudogene 10086	41.7853	24.7517	1.66146	0.732451	0.164645	0.837703
ENSMUSG00000030111	A2m	alpha-2-macroglobulin	5.53961	0.685383	3.88019	1.95613	0.164625	0.837703
ENSMUSG00000004707	Ly9	lymphocyte antigen 9	196.507	77.2557	2.52386	1.33563	0.164777	0.837797
ENSMUSG00000025138	Sirt7	sirtuin 7	432.771	321.458	1.3452	0.427823	0.164766	0.837797
ENSMUSG00000051486	Pcdhb11	protocadherin beta 11	9.65496	2.02344	3.52412	1.81726	0.164798	0.837797
ENSMUSG00000029651	Mtus2	microtubule associated tumor suppressor candidate 2	11.5998	3.11982	3.05835	1.61275	0.164827	0.837797
ENSMUSG00000019808	Adat2	adenosine deaminase, tRNA-specific 2	48.5254	30.0872	1.59311	0.671849	0.164911	0.837805
ENSMUSG00000050866	Clrn3	clarin 3	193.682	133.047	1.45234	0.538382	0.164986	0.837979
ENSMUSG00000087652	Gm15918	predicted gene 15918	3.52299	0	4.52299	2.17728	0.165801	0.838409
ENSMUSG00000024493	Lars	leucyl-tRNA synthetase	635.892	457.403	1.38937	0.474433	0.165892	0.838409
ENSMUSG00000024650	Slc22a6	solute carrier family 22 (organic anion transporter), member 6	5699.51	3933.27	1.44894	0.534995	0.165259	0.838409
ENSMUSG00000074890	Lcmt2	leucine carboxyl methyltransferase 2	185.48	122.023	1.51582	0.600097	0.165503	0.838409
ENSMUSG00000037885	Stk35	serine/threonine kinase 35	581.328	422.515	1.37499	0.45942	0.165224	0.838409
ENSMUSG00000062518	Zfp534	zinc finger protein 534	3.38345	0	4.38345	2.13207	0.165633	0.838409
ENSMUSG00000000355	Mcts1	malignant T cell amplified sequence 1	182.315	121.498	1.49647	0.581564	0.165879	0.838409
ENSMUSG00000042271	Nxt2	nuclear transport factor 2-like export factor 2	436.43	302.924	1.43927	0.52534	0.165703	0.838409
ENSMUSG00000038224	Serpinf2	serine (or cysteine) peptidase inhibitor, clade F, member 2	1163.58	867.659	1.34066	0.422943	0.16653	0.838466
ENSMUSG00000033983	Coil	coilin	97.9712	63.5021	1.53439	0.617663	0.166029	0.838466
ENSMUSG00000033417	Cacul1	CDK2 associated, cullin domain 1	1196.64	912.01	1.31175	0.391497	0.166064	0.838466
ENSMUSG00000016256	Ctsz	cathepsin Z	1002.15	720.779	1.38983	0.474911	0.16632	0.838466
ENSMUSG00000030972	Acsm5	acyl-CoA synthetase medium-chain family member 5	1005.76	571.303	1.75914	0.814873	0.166242	0.838466
ENSMUSG00000030979	Uros	uroporphyrinogen III synthase	165.237	112.523	1.46434	0.550248	0.166601	0.838466
ENSMUSG00000025497	Cdhr5	cadherin-related family member 5	1607.29	1183.6	1.35767	0.44113	0.166701	0.838763
ENSMUSG00000001588	Acap1	ArfGAP with coiled-coil, ankyrin repeat and PH domains 1	241.956	69.765	3.43329	1.77959	0.166981	0.838928
ENSMUSG00000037907	Ankrd13b	ankyrin repeat domain 13b	151.944	106.54	1.4222	0.508128	0.166962	0.838928
ENSMUSG00000021236	Entpd5	ectonucleoside triphosphate diphosphohydrolase 5	1783.53	1337.93	1.3328	0.414459	0.166894	0.838928
ENSMUSG00000021013	Ttc8	tetratricopeptide repeat domain 8	219.264	153.183	1.42858	0.514587	0.166799	0.838928
ENSMUSG00000033047	Eif3l	eukaryotic translation initiation factor 3, subunit L	1214.59	893.126	1.35953	0.443104	0.166867	0.838928
ENSMUSG00000074207	Adh1	alcohol dehydrogenase 1 (class I)	2001.74	1248.36	1.60301	0.680785	0.166963	0.838928
ENSMUSG00000005980	Dnase1	deoxyribonuclease I	3901.25	2565.89	1.52022	0.604283	0.1671	0.839237
ENSMUSG00000027455	Nsfl1c	NSFL1 (p97) cofactor (p47)	445.682	328.458	1.35581	0.439154	0.167124	0.839237
ENSMUSG00000043230	Fam124b	family with sequence similarity 124, member B	15.9857	6.81016	2.17483	1.1209	0.167375	0.839314
ENSMUSG00000031112	Stk26	serine/threonine kinase 26	108.103	42.0057	2.53694	1.34309	0.167405	0.839314
ENSMUSG00000045374	Wdr81	WD repeat domain 81	1435.49	1029.32	1.39422	0.479461	0.167532	0.839633
ENSMUSG00000068227	Il2rb	interleukin 2 receptor, beta chain	457.985	154.211	2.95717	1.56422	0.167705	0.84009
ENSMUSG00000030301	Ccdc91	coiled-coil domain containing 91	1065.96	786.343	1.35514	0.438447	0.167697	0.84009
ENSMUSG00000029551	Psmg3	proteasome (prosome, macropain) assembly chaperone 3	74.5047	48.9328	1.51213	0.596578	0.167791	0.840314
ENSMUSG00000020715	Ern1	endoplasmic reticulum (ER) to nucleus signalling 1	899.104	642.763	1.39819	0.483563	0.168141	0.84129
ENSMUSG00000031861	Lpar2	lysophosphatidic acid receptor 2	99.7533	64.0589	1.54865	0.631008	0.16828	0.841317
ENSMUSG00000039263	Npepl1	aminopeptidase-like 1	627.967	461.058	1.36123	0.444913	0.168688	0.842463
ENSMUSG00000039089	L3mbtl3	l(3)mbt-like 3 (Drosophila)	277.391	200.239	1.38338	0.468198	0.168845	0.842493
ENSMUSG00000018822	Sfrp5	secreted frizzled-related sequence protein 5	13.9923	2.10265	4.83209	2.27265	0.168766	0.842493
ENSMUSG00000026750	Psmb7	proteasome (prosome, macropain) subunit, beta type 7	543.919	403.695	1.34649	0.429208	0.168804	0.842493
ENSMUSG00000033105	Lss	lanosterol synthase	233.874	173.943	1.34257	0.425	0.170844	0.84341
ENSMUSG00000078439	Smim24	small integral membrane protein 24	454.547	331.944	1.36824	0.452321	0.169544	0.84341
ENSMUSG00000064181	Rab3ip	RAB3A interacting protein	2719.75	2082.08	1.30612	0.385288	0.170683	0.84341
ENSMUSG00000083752	Gm12014	predicted gene 12014	3.64375	0	4.64375	2.21529	0.16936	0.84341
ENSMUSG00000057967	Fgf18	fibroblast growth factor 18	14.1749	5.28789	2.41336	1.27104	0.170233	0.84341
ENSMUSG00000020326	Ccng1	cyclin G1	2113.55	1604.9	1.31674	0.396968	0.171122	0.84341
ENSMUSG00000020838	Slc6a4	solute carrier family 6 (neurotransmitter transporter, serotonin), member 4	41.3553	22.8105	1.77885	0.830943	0.171089	0.84341
ENSMUSG00000006575	Rundc3a	RUN domain containing 3A	84.7575	54.2477	1.55224	0.634349	0.169912	0.84341
ENSMUSG00000066553	Gm6969	predicted pseudogene 6969	133.397	97.6389	1.36252	0.446272	0.170879	0.84341
ENSMUSG00000002020	Ltbp2	latent transforming growth factor beta binding protein 2	47.4474	24.4723	1.90196	0.92749	0.16986	0.84341
ENSMUSG00000021371	Mcur1	mitochondrial calcium uniporter regulator 1	1384.67	1057.18	1.30949	0.389007	0.170163	0.84341
ENSMUSG00000052087	Rgs14	regulator of G-protein signaling 14	84.9013	38.9582	2.14978	1.10419	0.169936	0.84341
ENSMUSG00000062382	Ftl1-ps1	ferritin light polypeptide 1, pseudogene 1	1012.77	735.187	1.37705	0.461582	0.171176	0.84341
ENSMUSG00000047643	Gm5454	predicted gene 5454	176.615	125.749	1.40132	0.486783	0.170956	0.84341
ENSMUSG00000021913	Ogdhl	oxoglutarate dehydrogenase-like	58.2153	34.8413	1.65215	0.724347	0.17037	0.84341
ENSMUSG00000085523	Gm15945	predicted gene 15945	8.79236	2.25819	3.00546	1.58759	0.170353	0.84341
ENSMUSG00000087141	Plcxd2	phosphatidylinositol-specific phospholipase C, X domain containing 2	261.086	137.197	1.89648	0.923321	0.171064	0.84341
ENSMUSG00000022724	Mina	myc induced nuclear antigen	320.57	226.048	1.41631	0.502137	0.170597	0.84341
ENSMUSG00000014769	Psmb1	proteasome (prosome, macropain) subunit, beta type 1	832.469	625.583	1.33018	0.411622	0.169952	0.84341
ENSMUSG00000051977	Prdm9	PR domain containing 9	168.553	114.836	1.46373	0.549651	0.169177	0.84341
ENSMUSG00000073563	Csnk1g3	casein kinase 1, gamma 3	932.815	708.052	1.31699	0.397245	0.170859	0.84341
ENSMUSG00000024570	Rbfa	ribosome binding factor A	492.099	352.615	1.39445	0.479695	0.169787	0.84341
ENSMUSG00000081344	Gm14303	predicted gene 14303	1553.63	1161.49	1.33733	0.419352	0.170718	0.84341
ENSMUSG00000036362	P2ry13	purinergic receptor P2Y, G-protein coupled 13	27.1834	14.8534	1.77776	0.830058	0.170216	0.84341
ENSMUSG00000027937	Jtb	jumping translocation breakpoint	398.503	288.226	1.38129	0.466012	0.169986	0.84341
ENSMUSG00000028385	Snx30	sorting nexin family member 30	607.479	436.971	1.38931	0.474372	0.169693	0.84341
ENSMUSG00000087289	4933424M12Rik	RIKEN cDNA 4933424M12 gene	8.39589	1.99072	3.14168	1.65154	0.171105	0.84341
ENSMUSG00000025503	Taldo1	transaldolase 1	1476.77	1105.14	1.33597	0.417886	0.171139	0.84341
ENSMUSG00000038000	Acd	adrenocortical dysplasia	235.764	171.484	1.37267	0.456986	0.170643	0.84341
ENSMUSG00000083621	Gm14586	predicted gene 14586	2597.34	1926.54	1.34801	0.430834	0.169225	0.84341
ENSMUSG00000092074	Dynlt1a	dynein light chain Tctex-type 1A	7.15004	1.01717	4.04033	2.01447	0.171299	0.843607
ENSMUSG00000044056	Efcab9	EF-hand calcium binding domain 9	7.49333	1.47179	3.43611	1.78078	0.171773	0.844095
ENSMUSG00000084069	Gm12306	predicted gene 12306	6.06132	0.995362	3.53886	1.82329	0.171517	0.844095
ENSMUSG00000070394	Tmem256	transmembrane protein 256	370.347	249.537	1.4822	0.567744	0.171758	0.844095
ENSMUSG00000021660	Btf3	basic transcription factor 3	172.021	118.4	1.44908	0.535139	0.171764	0.844095
ENSMUSG00000022564	Grina	glutamate receptor, ionotropic, N-methyl D-aspartate-associated protein 1 (glutamate binding)	2383.47	1749.68	1.36202	0.445749	0.171702	0.844095
ENSMUSG00000002550	Uck1	uridine-cytidine kinase 1	311.023	213.499	1.45466	0.540685	0.172307	0.844095
ENSMUSG00000068129	Cst7	cystatin F (leukocystatin)	24.9954	10.0201	2.35891	1.23812	0.172275	0.844095
ENSMUSG00000029213	Commd8	COMM domain containing 8	483.863	359.039	1.34669	0.429423	0.172289	0.844095
ENSMUSG00000029440	Psmd9	proteasome (prosome, macropain) 26S subunit, non-ATPase, 9	211.919	146.886	1.43975	0.525821	0.171629	0.844095
ENSMUSG00000076545	Igkv4-72	immunoglobulin kappa chain variable 4-72	15.9595	0	16.9595	4.08402	0.172229	0.844095
ENSMUSG00000030336	Cd27	CD27 antigen	188.861	74.7036	2.50795	1.32651	0.171976	0.844095
ENSMUSG00000027601	Mtfr1	mitochondrial fission regulator 1	723.241	541.414	1.33522	0.417074	0.172595	0.844557
ENSMUSG00000026307	Scly	selenocysteine lyase	817.075	584.739	1.39666	0.481976	0.17383	0.845207
ENSMUSG00000035754	Wdr18	WD repeat domain 18	405.902	297.574	1.36282	0.446593	0.173087	0.845207
ENSMUSG00000001095	Slc13a2	solute carrier family 13 (sodium-dependent dicarboxylate transporter), member 2	174.801	105.728	1.64718	0.719997	0.174033	0.845207
ENSMUSG00000020635	Fkbp1b	FK506 binding protein 1b	31.441	14.6909	2.0675	1.04789	0.174321	0.845207
ENSMUSG00000022253	Nadk2	NAD kinase 2, mitochondrial	1018.42	757.081	1.34474	0.427331	0.173453	0.845207
ENSMUSG00000033220	Rac2	RAS-related C3 botulinum substrate 2	471.901	220.235	2.13755	1.09596	0.173904	0.845207
ENSMUSG00000013539	Tango2	transport and golgi organization 2	570.316	416.874	1.36719	0.451218	0.173181	0.845207
ENSMUSG00000068039	Tcp1	t-complex protein 1	1810.01	1377.54	1.31372	0.393654	0.174181	0.845207
ENSMUSG00000007338	Mrpl49	mitochondrial ribosomal protein L49	315.318	232.401	1.35525	0.438563	0.172987	0.845207
ENSMUSG00000079419	Ms4a6c	membrane-spanning 4-domains, subfamily A, member 6C	241.705	142.543	1.69081	0.757716	0.173177	0.845207
ENSMUSG00000044627	Swi5	SWI5 recombination repair homolog (yeast)	599.884	449.476	1.33389	0.415635	0.173578	0.845207
ENSMUSG00000027429	Sec23b	SEC23 homolog B, COPII coat complex component	860.35	640.732	1.34223	0.42463	0.174368	0.845207
ENSMUSG00000027752	Exosc8	exosome component 8	112.461	74.1251	1.5103	0.594834	0.172897	0.845207
ENSMUSG00000051517	Arhgef39	Rho guanine nucleotide exchange factor (GEF) 39	105.931	68.0193	1.54929	0.631611	0.173487	0.845207
ENSMUSG00000084403	Rps15a-ps8	ribosomal protein S15A, pseudogene 8	10.7115	3.10598	2.8523	1.51213	0.1743	0.845207
ENSMUSG00000028599	Tnfrsf1b	tumor necrosis factor receptor superfamily, member 1b	823.565	430.242	1.91207	0.935134	0.174071	0.845207
ENSMUSG00000028937	Acot7	acyl-CoA thioesterase 7	152.092	107.633	1.40926	0.494937	0.174234	0.845207
ENSMUSG00000025534	Gusb	glucuronidase, beta	465.823	334.206	1.39264	0.477826	0.1742	0.845207
ENSMUSG00000042389	Tsen2	tRNA splicing endonuclease subunit 2	74.4805	49.2141	1.50317	0.58801	0.174446	0.845207
ENSMUSG00000086032	Gm15929	predicted gene 15929	3.40561	0	4.40561	2.13934	0.173461	0.845207
ENSMUSG00000052833	Sae1	SUMO1 activating enzyme subunit 1	441.81	313.558	1.40772	0.493362	0.174393	0.845207
ENSMUSG00000033790	Tubgcp5	tubulin, gamma complex associated protein 5	304.996	221.224	1.37697	0.461497	0.173368	0.845207
ENSMUSG00000005465	Il27ra	interleukin 27 receptor, alpha	82.9663	29.6344	2.74092	1.45466	0.174119	0.845207
ENSMUSG00000031732	Phlpp2	PH domain and leucine rich repeat protein phosphatase 2	379.717	277.566	1.3667	0.4507	0.173048	0.845207
ENSMUSG00000051705	Senp8	SUMO/sentrin specific peptidase 8	114.339	79.3727	1.43506	0.521107	0.173692	0.845207
ENSMUSG00000004552	Ctse	cathepsin E	14.032	5.00952	2.50137	1.32272	0.174844	0.845362
ENSMUSG00000019837	Gtf3c6	general transcription factor IIIC, polypeptide 6, alpha	411.701	306.538	1.34195	0.424331	0.17467	0.845362
ENSMUSG00000024414	Mrpl27	mitochondrial ribosomal protein L27	131.615	94.3143	1.39135	0.476485	0.174924	0.845362
ENSMUSG00000022110	Sucla2	succinate-Coenzyme A ligase, ADP-forming, beta subunit	1765.17	1347.7	1.30953	0.389054	0.17492	0.845362
ENSMUSG00000047746	Fbxo40	F-box protein 40	543.578	340.269	1.59575	0.674232	0.174625	0.845362
ENSMUSG00000029204	Rhoh	ras homolog family member H	103.702	35.664	2.85572	1.51386	0.174865	0.845362
ENSMUSG00000055653	Gpc3	glypican 3	344.786	227.223	1.51512	0.599434	0.174925	0.845362
ENSMUSG00000038845	Phb	prohibitin	286.801	205.163	1.39599	0.481288	0.175197	0.845549
ENSMUSG00000091587	Gm17191	predicted gene 17191	4.86973	0.342692	4.37161	2.12817	0.1752	0.845549
ENSMUSG00000024767	Otub1	OTU domain, ubiquitin aldehyde binding 1	806.13	592.843	1.35916	0.44272	0.175094	0.845549
ENSMUSG00000020891	Alox8	arachidonate 8-lipoxygenase	8.30068	2.21457	2.89329	1.53271	0.17552	0.845594
ENSMUSG00000028636	Ppcs	phosphopantothenoylcysteine synthetase	232.999	171.214	1.35877	0.442302	0.175529	0.845594
ENSMUSG00000036995	Asap3	ArfGAP with SH3 domain, ankyrin repeat and PH domain 3	141.123	80.1723	1.75089	0.808085	0.17576	0.845594
ENSMUSG00000037108	Zcwpw1	zinc finger, CW type with PWWP domain 1	36.2768	20.8118	1.70903	0.773174	0.175341	0.845594
ENSMUSG00000042447	Mios	missing oocyte, meiosis regulator, homolog (Drosophila)	189.029	133.495	1.4129	0.498662	0.175612	0.845594
ENSMUSG00000072653	Zfp783	zinc finger protein 783	41.5036	23.0263	1.76904	0.822969	0.175744	0.845594
ENSMUSG00000018648	Dusp14	dual specificity phosphatase 14	84.5798	49.2083	1.7045	0.769345	0.176453	0.846421
ENSMUSG00000020948	Klhl28	kelch-like 28	98.4249	64.9866	1.50674	0.591433	0.176033	0.846421
ENSMUSG00000025870	Arl10	ADP-ribosylation factor-like 10	115.393	77.6403	1.48007	0.565666	0.176489	0.846421
ENSMUSG00000041707	1810011H11Rik	RIKEN cDNA 1810011H11 gene	50.0423	19.4766	2.49272	1.31772	0.176483	0.846421
ENSMUSG00000037525	Bcdin3d	BCDIN3 domain containing	62.5487	37.7848	1.63849	0.712371	0.176455	0.846421
ENSMUSG00000001289	Pfdn5	prefoldin 5	924.498	694.385	1.33092	0.412419	0.176395	0.846421
ENSMUSG00000028261	Ndufaf4	NADH dehydrogenase (ubiquinone) 1 alpha subcomplex, assembly factor 4	554.58	413.856	1.33921	0.421385	0.176345	0.846421
ENSMUSG00000029003	Mad2l2	MAD2 mitotic arrest deficient-like 2	75.6951	48.3784	1.55321	0.635255	0.175987	0.846421
ENSMUSG00000020335	Zfp354b	zinc finger protein 354B	42.7674	23.7088	1.77133	0.824834	0.177264	0.847559
ENSMUSG00000022742	Cpox	coproporphyrinogen oxidase	1138.08	718.465	1.58323	0.662873	0.17733	0.847559
ENSMUSG00000056612	Ppp1r14b	protein phosphatase 1, regulatory (inhibitor) subunit 14B	100.859	66.3229	1.51299	0.597406	0.177266	0.847559
ENSMUSG00000031725	Ces1f	carboxylesterase 1F	3447.77	2345.7	1.46963	0.555449	0.177323	0.847559
ENSMUSG00000048429	1810026J23Rik	RIKEN cDNA 1810026J23 gene	500.422	367.447	1.36091	0.444571	0.177296	0.847559
ENSMUSG00000020402	Vdac1	voltage-dependent anion channel 1	4443.67	3380.84	1.31428	0.394268	0.177398	0.847681
ENSMUSG00000020142	Slc1a4	solute carrier family 1 (glutamate/neutral amino acid transporter), member 4	112.609	68.0811	1.64458	0.717715	0.177706	0.847966
ENSMUSG00000029553	Tfec	transcription factor EC	123.748	73.9175	1.66514	0.73564	0.177544	0.847966
ENSMUSG00000005625	Psmd4	proteasome (prosome, macropain) 26S subunit, non-ATPase, 4	1574.14	1180.43	1.33324	0.414941	0.177941	0.848301
ENSMUSG00000026156	B3gat2	beta-1,3-glucuronyltransferase 2 (glucuronosyltransferase S)	516.036	369.47	1.39562	0.48091	0.178206	0.848368
ENSMUSG00000057134	Ado	2-aminoethanethiol (cysteamine) dioxygenase	361.761	264.105	1.36837	0.452455	0.178059	0.848368
ENSMUSG00000058260	Serpina9	serine (or cysteine) peptidase inhibitor, clade A (alpha-1 antiproteinase, antitrypsin), member 9	6.92205	0	7.92205	2.98587	0.178161	0.848368
ENSMUSG00000071633	Gm4952	predicted gene 4952	23.8694	13.0508	1.76995	0.823713	0.17819	0.848368
ENSMUSG00000031304	Il2rg	interleukin 2 receptor, gamma chain	187.653	90.2471	2.06749	1.04788	0.178113	0.848368
ENSMUSG00000026245	Farsb	phenylalanyl-tRNA synthetase, beta subunit	310.553	230.999	1.34291	0.425359	0.1787	0.849135
ENSMUSG00000055865	Fam19a3	family with sequence similarity 19, member A3	28.0762	3.14163	7.02047	2.81157	0.178505	0.849135
ENSMUSG00000029291	Rufy3	RUN and FYVE domain containing 3	2554.45	1698.21	1.5039	0.588713	0.17866	0.849135
ENSMUSG00000030942	Thumpd1	THUMP domain containing 1	360.261	260.321	1.38244	0.467218	0.178544	0.849135
ENSMUSG00000082812	Gm14860	predicted gene 14860	5.2829	0	6.2829	2.65143	0.17861	0.849135
ENSMUSG00000026155	Smap1	small ArfGAP 1	699.637	523.107	1.33682	0.418805	0.178927	0.849137
ENSMUSG00000019923	Zwint	ZW10 interactor	793.149	593.832	1.33508	0.416928	0.178881	0.849137
ENSMUSG00000034157	Cipc	CLOCK interacting protein, circadian	525.345	378.195	1.38806	0.473068	0.179153	0.849137
ENSMUSG00000021770	Samd8	sterile alpha motif domain containing 8	909.133	662.595	1.37152	0.455774	0.17908	0.849137
ENSMUSG00000083240	Gm13453	predicted gene 13453	396.844	294.735	1.34527	0.427894	0.179151	0.849137
ENSMUSG00000079563	Pglyrp2	peptidoglycan recognition protein 2	47.8929	17.3244	2.66818	1.41586	0.179319	0.849506
ENSMUSG00000025929	Il17a	interleukin 17A	6.22412	0	7.22412	2.85282	0.179928	0.849632
ENSMUSG00000020321	Mdh1	malate dehydrogenase 1, NAD (soluble)	7027.94	5368.42	1.30907	0.388541	0.179848	0.849632
ENSMUSG00000072946	Ptgr2	prostaglandin reductase 2	1455.79	1104.14	1.31819	0.39856	0.179459	0.849632
ENSMUSG00000076885	Traj45	T cell receptor alpha joining 45	6.22412	0	7.22412	2.85282	0.179928	0.849632
ENSMUSG00000038628	Polr3k	polymerase (RNA) III (DNA directed) polypeptide K	145.016	101.96	1.41818	0.50404	0.179701	0.849632
ENSMUSG00000084286	Cyp2j15-ps	cytochrome P450, family 2, subfamily j, member 15, pseudogene	12.7317	4.45499	2.51727	1.33186	0.179842	0.849632
ENSMUSG00000031432	Prps1	phosphoribosyl pyrophosphate synthetase 1	158.35	107.174	1.47309	0.558845	0.179398	0.849632
ENSMUSG00000039704	Lmbrd2	LMBR1 domain containing 2	1074.67	809.811	1.32666	0.407797	0.180144	0.849801
ENSMUSG00000087258	Gm15461	predicted gene 15461	4.77113	0.331787	4.33337	2.11549	0.180213	0.849801
ENSMUSG00000002635	Pdcd2l	programmed cell death 2-like	110.558	76.239	1.44433	0.530398	0.18028	0.849919
ENSMUSG00000024399	Ltb	lymphotoxin B	119.337	30.3277	3.84122	1.94156	0.180465	0.850093
ENSMUSG00000029161	Cgref1	cell growth regulator with EF hand domain 1	1474.39	1053.81	1.39872	0.48411	0.180367	0.850093
ENSMUSG00000076614	Ighg1	immunoglobulin heavy constant gamma 1 (G1m marker)	14.9371	0	15.9371	3.99432	0.18068	0.850628
ENSMUSG00000004018	Fancl	Fanconi anemia, complementation group L	60.7245	39.6229	1.51945	0.60355	0.180754	0.850783
ENSMUSG00000035150	Eif2s3x	eukaryotic translation initiation factor 2, subunit 3, structural gene X-linked	76.4309	54.7625	1.38858	0.473614	0.180924	0.851187
ENSMUSG00000045257	Morn2	MORN repeat containing 2	135.055	93.5893	1.43837	0.524437	0.181057	0.851618
ENSMUSG00000034792	Gna15	guanine nucleotide binding protein, alpha 15	85.5443	48.9141	1.73387	0.793993	0.181239	0.852081
ENSMUSG00000085068	Gm15895	predicted gene 15895	52.361	29.5097	1.74898	0.806516	0.181204	0.852081
ENSMUSG00000043110	Lrrn4	leucine rich repeat neuronal 4	9.32738	2.69792	2.79276	1.48169	0.181328	0.852109
ENSMUSG00000022372	Sla	src-like adaptor	754.305	395.043	1.90713	0.931401	0.181834	0.852917
ENSMUSG00000039001	Rps21	ribosomal protein S21	474.748	343.431	1.38126	0.465982	0.181776	0.852917
ENSMUSG00000045917	Tmem268	transmembrane protein 268	131.188	91.3163	1.4319	0.517933	0.181814	0.852917
ENSMUSG00000074277	Phldb3	pleckstrin homology like domain, family B, member 3	114.228	76.2323	1.49196	0.577213	0.181803	0.852917
ENSMUSG00000036712	Cyld	CYLD lysine 63 deubiquitinase	758.801	579.51	1.30885	0.388301	0.181619	0.852917
ENSMUSG00000015962	1700016C15Rik	RIKEN cDNA 1700016C15 gene	197.181	121.87	1.61293	0.689685	0.18243	0.853671
ENSMUSG00000078995	Zfp456	zinc finger protein 456	35.5905	19.5816	1.77783	0.830114	0.182532	0.853671
ENSMUSG00000035834	Polr3g	polymerase (RNA) III (DNA directed) polypeptide G	94.8409	64.3758	1.466	0.551885	0.182576	0.853671
ENSMUSG00000023755	Rhebl1	Ras homolog enriched in brain like 1	54.6344	35.6574	1.51769	0.601873	0.182556	0.853671
ENSMUSG00000073371	Gm6594	predicted pseudogene 6594	12.9873	4.90557	2.3685	1.24397	0.182455	0.853671
ENSMUSG00000028943	Espn	espin	306.239	220.617	1.38635	0.471294	0.182216	0.853671
ENSMUSG00000053977	Cd8a	CD8 antigen, alpha chain	134.911	28.7728	4.56495	2.1906	0.182484	0.853671
ENSMUSG00000034203	Chchd4	coiled-coil-helix-coiled-coil-helix domain containing 4	264.32	193.28	1.36566	0.4496	0.182738	0.853851
ENSMUSG00000060961	Slc4a4	solute carrier family 4 (anion exchanger), member 4	14923.4	11482.5	1.29964	0.378116	0.182791	0.853873
ENSMUSG00000085641	4930465M20Rik	RIKEN cDNA 4930465M20 gene	3.42778	0	4.42778	2.14658	0.182986	0.854199
ENSMUSG00000081664	Gm15544	predicted gene 15544	14.4426	6.12477	2.16745	1.116	0.183162	0.854631
ENSMUSG00000037971	1110032A03Rik	RIKEN cDNA 1110032A03 gene	362.514	280.217	1.29264	0.370326	0.183259	0.854888
ENSMUSG00000045466	Zfp956	zinc finger protein 956	80.6764	54.9767	1.45911	0.545092	0.183308	0.854921
ENSMUSG00000025209	Twnk	twinkle mtDNA helicase	357.301	260.117	1.37219	0.456476	0.183596	0.855481
ENSMUSG00000029725	Ppp1r35	protein phosphatase 1, regulatory subunit 35	80.8509	49.6005	1.61759	0.693847	0.183648	0.855532
ENSMUSG00000031506	Ptpn7	protein tyrosine phosphatase, non-receptor type 7	179.586	56.5876	3.13584	1.64885	0.184098	0.8556
ENSMUSG00000002329	Mdp1	magnesium-dependent phosphatase 1	302.64	227.503	1.32882	0.410149	0.184319	0.8556
ENSMUSG00000005615	Pcyt1a	phosphate cytidylyltransferase 1, choline, alpha isoform	1654.67	1278.77	1.29373	0.371539	0.184182	0.8556
ENSMUSG00000003546	Klc4	kinesin light chain 4	1141.13	844.653	1.35059	0.433589	0.18399	0.8556
ENSMUSG00000045826	Ptprcap	protein tyrosine phosphatase, receptor type, C polypeptide-associated protein	144.176	45.6127	3.11451	1.639	0.184089	0.8556
ENSMUSG00000026950	Neb	nebulin	64.9728	31.3054	2.04216	1.0301	0.184363	0.8556
ENSMUSG00000002108	Nr1h3	nuclear receptor subfamily 1, group H, member 3	282.526	195.498	1.4429	0.52897	0.183934	0.8556
ENSMUSG00000086926	Gm6226	predicted gene 6226	33.4959	17.6196	1.85266	0.889599	0.18423	0.8556
ENSMUSG00000000948	Gm38393	predicted gene, 38393	145.734	100.209	1.4498	0.535858	0.184161	0.8556
ENSMUSG00000005078	Jkamp	JNK1/MAPK8-associated membrane protein	145.246	94.7893	1.52675	0.610461	0.184982	0.856557
ENSMUSG00000038462	Uqcrfs1	ubiquinol-cytochrome c reductase, Rieske iron-sulfur polypeptide 1	2301.57	1758.11	1.30894	0.388401	0.184901	0.856557
ENSMUSG00000036908	Unc93b1	unc-93 homolog B1 (C. elegans)	1183.09	800.465	1.47741	0.563074	0.185079	0.856557
ENSMUSG00000002957	Ap2a2	adaptor-related protein complex 2, alpha 2 subunit	2285.47	1766.07	1.29393	0.371763	0.18499	0.856557
ENSMUSG00000033192	Lpcat2	lysophosphatidylcholine acyltransferase 2	128.485	90.3739	1.41709	0.502934	0.185211	0.856557
ENSMUSG00000031349	Nsdhl	NAD(P) dependent steroid dehydrogenase-like	304.342	232.24	1.30913	0.38861	0.185172	0.856557
ENSMUSG00000002280	Narfl	nuclear prelamin A recognition factor-like	362.556	266.535	1.35891	0.44245	0.185444	0.856862
ENSMUSG00000026721	Rabgap1l	RAB GTPase activating protein 1-like	1610.96	1233.63	1.30562	0.38474	0.1859	0.85761
ENSMUSG00000089764	Gm16580	predicted gene 16580	473.399	349.264	1.35441	0.437659	0.185849	0.85761
ENSMUSG00000028457	Atp8b5	ATPase, class I, type 8B, member 5	21.0399	10.1538	1.976	0.982581	0.185893	0.85761
ENSMUSG00000029189	Sel1l3	sel-1 suppressor of lin-12-like 3 (C. elegans)	673.11	428.653	1.56896	0.649812	0.185788	0.85761
ENSMUSG00000091815	Gm17153	predicted gene 17153	7.12658	1.10729	3.85642	1.94726	0.18599	0.857639
ENSMUSG00000070601	Vmn2r84	vomeronasal 2, receptor 84	7.11018	1.88278	2.81332	1.49227	0.186348	0.857821
ENSMUSG00000049299	Trappc1	trafficking protein particle complex 1	129.416	91.9441	1.40317	0.488687	0.186351	0.857821
ENSMUSG00000071645	Tut1	terminal uridylyl transferase 1, U6 snRNA-specific	240.833	171.627	1.40089	0.486349	0.186182	0.857821
ENSMUSG00000027305	Ndufaf1	NADH dehydrogenase (ubiquinone) 1 alpha subcomplex, assembly factor 1	193.221	142.661	1.35194	0.435028	0.186328	0.857821
ENSMUSG00000086968	4933431E20Rik	RIKEN cDNA 4933431E20 gene	157.96	95.075	1.65454	0.726429	0.186344	0.857821
ENSMUSG00000076461	Trbv1	T cell receptor beta, variable 1	18.9293	1.43907	8.17084	3.03048	0.186263	0.857821
ENSMUSG00000044573	Acp1	acid phosphatase 1, soluble	154.629	108.106	1.4264	0.512383	0.186641	0.858121
ENSMUSG00000064036	Mro	maestro	25.7352	9.13371	2.63824	1.39958	0.186582	0.858121
ENSMUSG00000090817	Gm4450	predicted gene 4450	178.091	75.3278	2.34635	1.23042	0.186612	0.858121
ENSMUSG00000024503	Spink1	serine peptidase inhibitor, Kazal type 1	680.563	441.838	1.53908	0.622066	0.186751	0.858239
ENSMUSG00000053541	Gm4759	predicted gene 4759	356.177	147.15	2.41092	1.26958	0.186862	0.858363
ENSMUSG00000025917	Cops5	COP9 signalosome subunit 5	469.774	349.23	1.34419	0.426732	0.187594	0.858424
ENSMUSG00000004151	Etv1	ets variant 1	246.232	168.597	1.45776	0.543757	0.187386	0.858424
ENSMUSG00000033114	Slc35d2	solute carrier family 35, member D2	89.8564	59.6603	1.49779	0.582835	0.18712	0.858424
ENSMUSG00000017756	Slc12a7	solute carrier family 12, member 7	3004.3	2289.56	1.31204	0.391813	0.187674	0.858424
ENSMUSG00000091014	Gm5244	predicted pseudogene 5244	4.39683	0.342692	4.01941	2.00698	0.187415	0.858424
ENSMUSG00000052056	Zfp217	zinc finger protein 217	683.551	510.775	1.3376	0.41965	0.187603	0.858424
ENSMUSG00000027962	Vcam1	vascular cell adhesion molecule 1	732.092	445.879	1.64047	0.714112	0.18704	0.858424
ENSMUSG00000080746	Rpsa-ps12	ribosomal protein SA, pseudogene 12	80.526	52.4637	1.52489	0.608701	0.187113	0.858424
ENSMUSG00000081359	Cox20-ps	COX20 Cox2 chaperone, pseudogene	106.239	73.1735	1.44578	0.53185	0.187379	0.858424
ENSMUSG00000052698	Tln2	talin 2	4201.5	3209.23	1.3091	0.388573	0.18754	0.858424
ENSMUSG00000047528	Als2cr12	amyotrophic lateral sclerosis 2 (juvenile) chromosome region, candidate 12 (human)	25.9947	14.4078	1.75202	0.80902	0.18791	0.858444
ENSMUSG00000026192	Atic	5-aminoimidazole-4-carboxamide ribonucleotide formyltransferase/IMP cyclohydrolase	240.499	175.863	1.36546	0.449389	0.187849	0.858444
ENSMUSG00000022148	Fyb	FYN binding protein	2100.03	1169.48	1.79502	0.843997	0.18787	0.858444
ENSMUSG00000054612	Mgmt	O-6-methylguanine-DNA methyltransferase	24.0047	12.1813	1.89699	0.923708	0.187954	0.858444
ENSMUSG00000038225	Primpol	primase and polymerase (DNA-directed)	107.687	77.7303	1.3805	0.465194	0.188057	0.858444
ENSMUSG00000056162	Cndp1	carnosine dipeptidase 1 (metallopeptidase M20 family)	836.513	482.93	1.73065	0.791315	0.188158	0.858687
ENSMUSG00000078348	Sf3b5	splicing factor 3b, subunit 5	165.474	113.434	1.45476	0.54078	0.188414	0.859114
ENSMUSG00000079000	Dnmt3bos	DNA methyltransferase 3B, opposite strand	5.7047	0.663575	4.0303	2.01089	0.188655	0.859982
ENSMUSG00000081985	Gng2-ps1	guanine nucleotide binding protein (G protein), gamma 2 subunit, pseudogene 1	5.31162	0.775498	3.55484	1.82979	0.189128	0.861023
ENSMUSG00000053852	Adgrg4	adhesion G protein-coupled receptor G4	35.7697	7.98575	4.092	2.03281	0.189104	0.861023
ENSMUSG00000020610	Amz2	archaelysin family metallopeptidase 2	522.88	375.427	1.39172	0.476865	0.189328	0.861744
ENSMUSG00000060376	Bckdha	branched chain ketoacid dehydrogenase E1, alpha polypeptide	1706.24	1310.07	1.30218	0.380926	0.189783	0.862661
ENSMUSG00000035498	Cdcp1	CUB domain containing protein 1	611.2	447.581	1.36475	0.448635	0.189749	0.862661
ENSMUSG00000057614	Gnai1	guanine nucleotide binding protein (G protein), alpha inhibiting 1	702.329	530.289	1.32382	0.404703	0.189925	0.863115
ENSMUSG00000048163	Selplg	selectin, platelet (p-selectin) ligand	643.152	319.592	2.00926	1.00666	0.190116	0.863622
ENSMUSG00000047021	Ccdc108	coiled-coil domain containing 108	22.5831	2.78803	6.2257	2.63823	0.19025	0.863873
ENSMUSG00000032898	Fbxo21	F-box protein 21	685.373	521.092	1.31466	0.39469	0.190804	0.865537
ENSMUSG00000040466	Blvrb	biliverdin reductase B (flavin reductase (NADPH))	106.612	73.0566	1.45311	0.53914	0.190839	0.865537
ENSMUSG00000082981	Polr2k-ps	polymerase (RNA) II (DNA directed) polypeptide K, pseudogene	8.04058	1.35986	3.83098	1.93771	0.190928	0.865581
ENSMUSG00000040385	Ppp1ca	protein phosphatase 1, catalytic subunit, alpha isoform	1263.99	934.101	1.35279	0.435936	0.191011	0.865581
ENSMUSG00000037703	Lzts3	leucine zipper, putative tumor suppressor family member 3	1542.34	1149.79	1.34112	0.423437	0.191181	0.865581
ENSMUSG00000037325	Bbs7	Bardet-Biedl syndrome 7 (human)	80.4836	54.8251	1.45962	0.545596	0.191417	0.865581
ENSMUSG00000091575	2010016I18Rik	RIKEN cDNA 2010016I18 gene	27.0807	8.93063	2.82768	1.49962	0.191084	0.865581
ENSMUSG00000064945	Rny3	RNA, Y3 small cytoplasmic (associated with Ro protein)	410.205	231.834	1.76609	0.820557	0.191665	0.865581
ENSMUSG00000052736	Klrc2	killer cell lectin-like receptor subfamily C, member 2	21.0481	4.76093	3.82717	1.93628	0.191352	0.865581
ENSMUSG00000031731	Ap1g1	adaptor protein complex AP-1, gamma 1 subunit	1607.72	1242.08	1.29414	0.371996	0.191173	0.865581
ENSMUSG00000031360	Ctps2	cytidine 5'-triphosphate synthase 2	396.38	285.996	1.38462	0.469489	0.191664	0.865581
ENSMUSG00000086795	Gm11579	predicted gene 11579	8.05707	1.77484	3.26399	1.70664	0.192666	0.866884
ENSMUSG00000086706	Gm15848	predicted gene 15848	169.066	103.055	1.63439	0.708751	0.194702	0.866884
ENSMUSG00000020083	2010107G23Rik	RIKEN cDNA 2010107G23 gene	24.1826	10.9006	2.11608	1.0814	0.192933	0.866884
ENSMUSG00000009115	Spatc1l	spermatogenesis and centriole associated 1 like	16.4658	6.17531	2.43415	1.28342	0.193232	0.866884
ENSMUSG00000091086	Rpl6l	ribosomal protein L6-like	455.169	334.206	1.36086	0.44452	0.193902	0.866884
ENSMUSG00000021040	Slirp	SRA stem-loop interacting RNA binding protein	136.138	92.5681	1.46564	0.551534	0.193938	0.866884
ENSMUSG00000035509	Fbxl21	F-box and leucine-rich repeat protein 21	47.4245	22.7065	2.04267	1.03046	0.194283	0.866884
ENSMUSG00000021737	Psmd6	proteasome (prosome, macropain) 26S subunit, non-ATPase, 6	730.615	538.655	1.35571	0.439048	0.192924	0.866884
ENSMUSG00000043157	Arl11	ADP-ribosylation factor-like 11	22.7102	12.307	1.78178	0.83332	0.194248	0.866884
ENSMUSG00000038725	Pkhd1l1	polycystic kidney and hepatic disease 1-like 1	6.048	1.12909	3.31033	1.72697	0.193742	0.866884
ENSMUSG00000055660	Mettl4	methyltransferase like 4	161.232	108.745	1.47826	0.563898	0.193481	0.866884
ENSMUSG00000024359	Hspa9	heat shock protein 9	8834.14	6803.04	1.29852	0.376863	0.192562	0.866884
ENSMUSG00000024664	Fads3	fatty acid desaturase 3	956.341	697.171	1.37121	0.455452	0.192598	0.866884
ENSMUSG00000024665	Fads2	fatty acid desaturase 2	645.161	482.336	1.33688	0.418866	0.193266	0.866884
ENSMUSG00000026664	Phyh	phytanoyl-CoA hydroxylase	3676.49	2804.74	1.3107	0.390342	0.193625	0.866884
ENSMUSG00000080979	Gm13675	predicted gene 13675	24.8142	13.9194	1.73024	0.790974	0.194234	0.866884
ENSMUSG00000027349	Fam98b	family with sequence similarity 98, member B	192.835	133.379	1.44245	0.528519	0.193835	0.866884
ENSMUSG00000018322	Tomm34	translocase of outer mitochondrial membrane 34	376.592	276.71	1.35966	0.443246	0.194569	0.866884
ENSMUSG00000068739	Sars	seryl-aminoacyl-tRNA synthetase	1078.46	819.533	1.31556	0.395673	0.194063	0.866884
ENSMUSG00000028766	Alpl	alkaline phosphatase, liver/bone/kidney	3188.3	2440.33	1.30638	0.385571	0.192344	0.866884
ENSMUSG00000039917	Rhbdd2	rhomboid domain containing 2	353.242	254.951	1.38402	0.468865	0.192715	0.866884
ENSMUSG00000083041	Gm9835	predicted pseudogene 9835	62.0219	42.8735	1.43645	0.522505	0.192298	0.866884
ENSMUSG00000029775	Klhdc10	kelch domain containing 10	955.223	716.948	1.33188	0.413468	0.194519	0.866884
ENSMUSG00000076586	Igkv8-21	immunoglobulin kappa variable 8-21	15.9817	0	16.9817	4.08591	0.19296	0.866884
ENSMUSG00000030030	1700003E16Rik	RIKEN cDNA 1700003E16 gene	40.298	23.9079	1.65803	0.729469	0.194685	0.866884
ENSMUSG00000015709	Arnt2	aryl hydrocarbon receptor nuclear translocator 2	671.652	496.237	1.35278	0.435927	0.192887	0.866884
ENSMUSG00000031628	Casp3	caspase 3	109.717	73.2725	1.49068	0.575975	0.193069	0.866884
ENSMUSG00000032399	Rpl4	ribosomal protein L4	5577.43	4269.8	1.30618	0.385351	0.19374	0.866884
ENSMUSG00000086158	Ccpg1os	cell cycle progression 1, opposite strand	132.336	91.6698	1.43883	0.524896	0.194239	0.866884
ENSMUSG00000032564	Cpne4	copine IV	64.2519	43.5945	1.46323	0.549154	0.192334	0.866884
ENSMUSG00000050621	Rps27rt	ribosomal protein S27, retrogene	1263.92	951.707	1.32771	0.408937	0.194483	0.866884
ENSMUSG00000020392	Cdkn2aipnl	CDKN2A interacting protein N-terminal like	186.447	133.189	1.39689	0.482214	0.194783	0.867006
ENSMUSG00000091144	Phf11c	PHD finger protein 11C	57.3843	38.9731	1.46059	0.546553	0.194814	0.867006
ENSMUSG00000083669	Gm10169	predicted pseudogene 10169	393.434	298.12	1.31865	0.399061	0.194926	0.867313
ENSMUSG00000042198	Chchd7	coiled-coil-helix-coiled-coil-helix domain containing 7	326.275	246.634	1.32161	0.402294	0.195113	0.867959
ENSMUSG00000014077	Chp1	calcineurin-like EF hand protein 1	811.421	598.477	1.35522	0.438523	0.195303	0.868233
ENSMUSG00000001741	Il16	interleukin 16	259.424	150.348	1.72069	0.782988	0.195264	0.868233
ENSMUSG00000027239	Mdk	midkine	419.59	309.017	1.35667	0.440069	0.195782	0.868923
ENSMUSG00000021417	Eci2	enoyl-Coenzyme A delta isomerase 2	486.366	361.108	1.34592	0.428588	0.196173	0.869018
ENSMUSG00000049871	Nlrc3	NLR family, CARD domain containing 3	154.039	66.3376	2.30241	1.20315	0.196202	0.869018
ENSMUSG00000024069	Slc30a6	solute carrier family 30 (zinc transporter), member 6	98.4943	67.0518	1.46204	0.54798	0.196097	0.869018
ENSMUSG00000032409	Atr	ataxia telangiectasia and Rad3 related	441.581	321.215	1.37356	0.457919	0.195896	0.869018
ENSMUSG00000058704	Memo1	mediator of cell motility 1	210.225	153.704	1.36535	0.449272	0.196388	0.869277
ENSMUSG00000062580	Timm17a	translocase of inner mitochondrial membrane 17a	313.037	230.927	1.35403	0.437259	0.196508	0.869428
ENSMUSG00000001783	Rtcb	RNA 2',3'-cyclic phosphate and 5'-OH ligase	962.58	742.261	1.29642	0.374535	0.197748	0.869452
ENSMUSG00000035365	Parpbp	PARP1 binding protein	9.23971	2.36613	3.04199	1.60501	0.196605	0.869452
ENSMUSG00000040471	Ggt6	gamma-glutamyltransferase 6	87.3871	45.8073	1.88832	0.917103	0.196714	0.869452
ENSMUSG00000002332	Dhrs1	dehydrogenase/reductase (SDR family) member 1	640.717	471.958	1.35681	0.440224	0.197702	0.869452
ENSMUSG00000023266	Frs3	fibroblast growth factor receptor substrate 3	63.4202	40.147	1.56561	0.646728	0.197016	0.869452
ENSMUSG00000027324	Rpusd2	RNA pseudouridylate synthase domain containing 2	102.947	73.355	1.39799	0.48335	0.197719	0.869452
ENSMUSG00000033068	Entpd6	ectonucleoside triphosphate diphosphohydrolase 6	165.096	118.767	1.38682	0.471783	0.197566	0.869452
ENSMUSG00000074479	Gm10704	predicted pseudogene 10704	427.425	322.623	1.32384	0.40473	0.19719	0.869452
ENSMUSG00000029221	Slc30a9	solute carrier family 30 (zinc transporter), member 9	1601.82	1228.75	1.30336	0.382238	0.197667	0.869452
ENSMUSG00000035234	Fam175a	family with sequence similarity 175, member A	105.231	70.5362	1.485	0.570461	0.197402	0.869452
ENSMUSG00000047230	Cldn2	claudin 2	3242.22	2301.2	1.40875	0.494414	0.197311	0.869452
ENSMUSG00000021102	Glrx5	glutaredoxin 5	289.441	216.475	1.33552	0.417398	0.197929	0.869482
ENSMUSG00000022248	Rad1	RAD1 checkpoint DNA exonuclease	75.9101	48.701	1.54746	0.629898	0.198054	0.869482
ENSMUSG00000083287	Gm13502	predicted gene 13502	230.74	172.317	1.33709	0.419093	0.198054	0.869482
ENSMUSG00000067274	Rplp0	ribosomal protein, large, P0	2062.37	1599.74	1.28902	0.36627	0.198223	0.869482
ENSMUSG00000048636	A730049H05Rik	RIKEN cDNA A730049H05 gene	30.5666	17.274	1.72741	0.788609	0.197924	0.869482
ENSMUSG00000052974	Cyp2f2	cytochrome P450, family 2, subfamily f, polypeptide 2	36.8957	20.4851	1.76382	0.818702	0.198049	0.869482
ENSMUSG00000067768	Xlr4b	X-linked lymphocyte-regulated 4B	14.0829	5.90785	2.18344	1.12661	0.198201	0.869482
ENSMUSG00000040521	Tsfm	Ts translation elongation factor, mitochondrial	218.286	158.752	1.37266	0.456973	0.198307	0.869663
ENSMUSG00000074576	Mocs3	molybdenum cofactor synthesis 3	29.1027	14.4929	1.943	0.958283	0.198494	0.870294
ENSMUSG00000005364	Il5ra	interleukin 5 receptor, alpha	115.49	61.9947	1.8492	0.886904	0.198718	0.870533
ENSMUSG00000002059	Rab34	RAB34, member RAS oncogene family	316.854	236.251	1.33973	0.421946	0.198782	0.870627
ENSMUSG00000044751	Gm12231	predicted gene 12231	2006.02	1557.33	1.28793	0.365056	0.199197	0.870641
ENSMUSG00000008333	Snrpb2	U2 small nuclear ribonucleoprotein B	141.052	102.002	1.37912	0.463751	0.199069	0.870641
ENSMUSG00000085614	1700123M08Rik	RIKEN cDNA 1700123M08 gene	4.19964	0.331787	3.90426	1.96505	0.199038	0.870641
ENSMUSG00000054986	Sec14l3	SEC14-like lipid binding 3	30.2693	14.1175	2.06842	1.04853	0.199548	0.871552
ENSMUSG00000028629	Exo5	exonuclease 5	60.8862	38.8515	1.55292	0.634984	0.199704	0.87159
ENSMUSG00000050553	Gk2	glycerol kinase 2	7.36581	1.69165	3.10806	1.63601	0.199626	0.87159
ENSMUSG00000061577	Adgrg5	adhesion G protein-coupled receptor G5	50.6052	19.7452	2.48757	1.31474	0.199674	0.87159
ENSMUSG00000004356	Utp20	UTP20 small subunit processome component	990.672	711.851	1.39113	0.476262	0.199897	0.871954
ENSMUSG00000069844	Sco1	SCO1 cytochrome c oxidase assembly protein	225.814	168.394	1.33897	0.421128	0.19987	0.871954
ENSMUSG00000028573	Fggy	FGGY carbohydrate kinase domain containing	851.406	569.489	1.49417	0.57934	0.199975	0.872108
ENSMUSG00000032301	Psma4	proteasome (prosome, macropain) subunit, alpha type 4	958.024	722.238	1.32601	0.407096	0.200063	0.872307
ENSMUSG00000069255	Dusp22	dual specificity phosphatase 22	199.677	150.274	1.32657	0.407704	0.200224	0.872391
ENSMUSG00000076518	Igkv2-112	immunoglobulin kappa variable 2-112	14.7523	0	15.7523	3.97749	0.200328	0.872391
ENSMUSG00000032446	Eomes	eomesodermin	61.263	22.5854	2.63989	1.40048	0.200424	0.872391
ENSMUSG00000031163	Glod5	glyoxalase domain containing 5	138.485	102.392	1.34908	0.43198	0.20034	0.872391
ENSMUSG00000000743	Chmp1a	charged multivesicular body protein 1A	345.788	256.024	1.34924	0.432149	0.200476	0.872433
ENSMUSG00000067121	Gm7027	predicted gene 7027	126.201	87.2021	1.44215	0.528222	0.200563	0.87244
ENSMUSG00000020372	Rack1	receptor for activated C kinase 1	3251.45	2464.78	1.31904	0.399487	0.20085	0.873314
ENSMUSG00000058690	Ccser2	coiled-coil serine rich 2	2295.64	1781.02	1.28879	0.366017	0.200984	0.873517
ENSMUSG00000052146	Rps10	ribosomal protein S10	94.1293	65.1897	1.43722	0.523282	0.201058	0.873517
ENSMUSG00000084235	Gm15421	predicted gene 15421	22.9493	11.6939	1.88668	0.915847	0.201109	0.873517
ENSMUSG00000042305	Tmem183a	transmembrane protein 183A	754.6	571.618	1.31955	0.400049	0.201425	0.873872
ENSMUSG00000022102	Dok2	docking protein 2	113.899	64.5985	1.75154	0.808628	0.202168	0.873872
ENSMUSG00000003526	Prodh	proline dehydrogenase	3830.39	2786.82	1.37433	0.45873	0.202123	0.873872
ENSMUSG00000047810	Ccdc88b	coiled-coil domain containing 88B	441.613	251.829	1.75064	0.807886	0.201887	0.873872
ENSMUSG00000056999	Ide	insulin degrading enzyme	1476.6	1132.33	1.30376	0.38268	0.202101	0.873872
ENSMUSG00000084342	Gm11224	predicted gene 11224	75.4309	49.2814	1.52006	0.604132	0.201755	0.873872
ENSMUSG00000025791	Pgm2	phosphoglucomutase 2	633.625	457.608	1.38381	0.468644	0.201768	0.873872
ENSMUSG00000051498	Tlr6	toll-like receptor 6	40.8536	19.0943	2.08286	1.05856	0.201686	0.873872
ENSMUSG00000029664	Tfpi2	tissue factor pathway inhibitor 2	53.4171	36.1338	1.46543	0.551327	0.201705	0.873872
ENSMUSG00000030365	Clec2i	C-type lectin domain family 2, member i	74.8782	27.0731	2.70288	1.4345	0.201593	0.873872
ENSMUSG00000020420	Zfp607a	zinc finger protein 607A	53.3555	32.1739	1.6385	0.712375	0.201615	0.873872
ENSMUSG00000030924	2610020H08Rik	RIKEN cDNA 2610020H08 gene	100.5	59.3551	1.68172	0.749934	0.202176	0.873872
ENSMUSG00000008129	4930432K21Rik	RIKEN cDNA 4930432K21 gene	15.6203	5.34131	2.62095	1.39009	0.201842	0.873872
ENSMUSG00000006519	Cyba	cytochrome b-245, alpha polypeptide	1105.05	830.639	1.32996	0.411384	0.201341	0.873872
ENSMUSG00000058470	Gm8369	predicted gene 8369	12.6378	4.11518	2.66614	1.41475	0.202559	0.875154
ENSMUSG00000084970	1700060J05Rik	RIKEN cDNA 1700060J05 gene	8.68513	2.23638	2.99258	1.58139	0.202832	0.875776
ENSMUSG00000038679	Trps1	trichorhinophalangeal syndrome I (human)	2628.44	1967.95	1.33545	0.417327	0.202984	0.876065
ENSMUSG00000024446	Rpp21	ribonuclease P 21 subunit	146.539	103.081	1.41755	0.503395	0.203234	0.876959
ENSMUSG00000048707	Tprn	taperin	306.831	214.329	1.42958	0.515595	0.203283	0.876984
ENSMUSG00000057363	Uxs1	UDP-glucuronate decarboxylase 1	335.115	229.874	1.45584	0.541848	0.203527	0.877383
ENSMUSG00000055541	Lair1	leukocyte-associated Ig-like receptor 1	387.958	204.174	1.89575	0.922768	0.203547	0.877383
ENSMUSG00000031165	Was	Wiskott-Aldrich syndrome	261.797	153.824	1.69739	0.76332	0.203487	0.877383
ENSMUSG00000028234	Rps20	ribosomal protein S20	807.037	620.443	1.30026	0.3788	0.203616	0.877495
ENSMUSG00000050854	Tmem125	transmembrane protein 125	113.636	76.0817	1.48721	0.572604	0.203758	0.877924
ENSMUSG00000048217	Nags	N-acetylglutamate synthase	4.77769	0.775498	3.25412	1.70227	0.203943	0.8783
ENSMUSG00000025980	Hspd1	heat shock protein 1 (chaperonin)	2249.06	1735.01	1.29611	0.374189	0.204043	0.878409
ENSMUSG00000035027	Map2k2	mitogen-activated protein kinase kinase 2	1558.85	1199.3	1.29955	0.378013	0.204318	0.878603
ENSMUSG00000040350	Trim7	tripartite motif-containing 7	1397.78	829.496	1.68427	0.752126	0.204215	0.878603
ENSMUSG00000035042	Ccl5	chemokine (C-C motif) ligand 5	241.621	87.0992	2.75395	1.4615	0.204415	0.878603
ENSMUSG00000015766	Eps8	epidermal growth factor receptor pathway substrate 8	2107.17	1565.66	1.34565	0.428305	0.20447	0.878603
ENSMUSG00000031543	Ank1	ankyrin 1, erythroid	25.5685	12.4626	1.97351	0.980761	0.204382	0.878603
ENSMUSG00000044067	Gpr22	G protein-coupled receptor 22	21.4998	10.1746	2.01348	1.00969	0.204532	0.878662
ENSMUSG00000026979	Psd4	pleckstrin and Sec7 domain containing 4	397.137	177.876	2.22578	1.15431	0.204867	0.879546
ENSMUSG00000069925	4932416K20Rik	RIKEN cDNA 4932416K20 gene	6.35372	1.32715	3.15997	1.65991	0.204928	0.879625
ENSMUSG00000028064	Sema4a	sema domain, immunoglobulin domain (Ig), transmembrane domain (TM) and short cytoplasmic domain, (semaphorin) 4A	1130.92	894.474	1.26404	0.338045	0.20507	0.880049
ENSMUSG00000009772	Nuak2	NUAK family, SNF1-like kinase, 2	1434.95	1044.48	1.37349	0.457843	0.205704	0.881642
ENSMUSG00000018848	Rars	arginyl-tRNA synthetase	476.107	361.104	1.3176	0.397909	0.205847	0.881642
ENSMUSG00000090381	Gm6158	predicted gene 6158	168.06	123.026	1.3631	0.446895	0.205673	0.881642
ENSMUSG00000003644	Rps6ka1	ribosomal protein S6 kinase polypeptide 1	485.244	369.032	1.31406	0.394028	0.205821	0.881642
ENSMUSG00000080893	Gm15920	predicted gene 15920	481.995	361.173	1.3336	0.415329	0.205963	0.881642
ENSMUSG00000004268	Emg1	EMG1 N1-specific pseudouridine methyltransferase	269.133	195.05	1.37788	0.462448	0.205883	0.881642
ENSMUSG00000034345	Gtf2h5	general transcription factor IIH, polypeptide 5	245.725	176.784	1.38778	0.472781	0.206174	0.881872
ENSMUSG00000024120	Lrpprc	leucine-rich PPR-motif containing	1810.72	1410.22	1.2838	0.360419	0.206229	0.881872
ENSMUSG00000038843	Gcnt1	glucosaminyl (N-acetyl) transferase 1, core 2	3785.87	2956.24	1.28054	0.356752	0.206544	0.882849
ENSMUSG00000026548	Slamf9	SLAM family member 9	187.983	104.953	1.78365	0.834834	0.207783	0.882853
ENSMUSG00000033307	Mif	macrophage migration inhibitory factor	284.197	197.191	1.43901	0.525072	0.20659	0.882853
ENSMUSG00000078572	Ndufaf8	NADH dehydrogenase (ubiquinone) 1 alpha subcomplex assembly factor 8	169.708	116.452	1.45343	0.539457	0.206807	0.882853
ENSMUSG00000022013	Dnajc15	DnaJ heat shock protein family (Hsp40) member C15	569.946	424.504	1.34181	0.424184	0.207295	0.882853
ENSMUSG00000025781	Atp5c1	ATP synthase, H+ transporting, mitochondrial F1 complex, gamma polypeptide 1	3479.36	2651.39	1.31216	0.391945	0.207261	0.882853
ENSMUSG00000082367	Gm12363	predicted gene 12363	14.3269	1.01717	7.59823	2.92566	0.207724	0.882853
ENSMUSG00000029468	P2rx7	purinergic receptor P2X, ligand-gated ion channel, 7	367.998	220.725	1.66422	0.734843	0.207972	0.882853
ENSMUSG00000016510	Mtif3	mitochondrial translational initiation factor 3	437.234	331.368	1.31852	0.398921	0.207705	0.882853
ENSMUSG00000061414	Cracr2a	calcium release activated channel regulator 2A	56.588	21.8249	2.52303	1.33516	0.207906	0.882853
ENSMUSG00000030802	Bckdk	branched chain ketoacid dehydrogenase kinase	399.136	306.372	1.3018	0.380504	0.206816	0.882853
ENSMUSG00000031758	Cdyl2	chromodomain protein, Y chromosome-like 2	132.188	91.7045	1.43669	0.522749	0.207513	0.882853
ENSMUSG00000009927	Rps25	ribosomal protein S25	176.214	127.419	1.37997	0.464633	0.207721	0.882853
ENSMUSG00000040675	Mthfd1l	methylenetetrahydrofolate dehydrogenase (NADP+ dependent) 1-like	87.2925	57.6772	1.50472	0.58949	0.208041	0.882963
ENSMUSG00000041372	B4galnt3	beta-1,4-N-acetyl-galactosaminyl transferase 3	486.073	345.182	1.40699	0.49261	0.208157	0.883099
ENSMUSG00000087538	Gm16341	predicted gene 16341	4.20302	0.331787	3.90679	1.96599	0.209928	0.883265
ENSMUSG00000034159	2310007B03Rik	RIKEN cDNA 2310007B03 gene	16.3398	8.80885	1.76777	0.821928	0.209428	0.883265
ENSMUSG00000006731	B4galnt1	beta-1,4-N-acetyl-galactosaminyl transferase 1	328.65	172.366	1.90147	0.927113	0.210049	0.883265
ENSMUSG00000020122	Egfr	epidermal growth factor receptor	1195.81	886.127	1.34908	0.431979	0.208524	0.883265
ENSMUSG00000058809	Hspd1-ps3	heat shock protein 1 (chaperonin), pseudogene 3	2002.1	1578.65	1.26807	0.342629	0.208533	0.883265
ENSMUSG00000042700	Sipa1l1	signal-induced proliferation-associated 1 like 1	2281.25	1758.5	1.2971	0.375289	0.209988	0.883265
ENSMUSG00000021711	Trappc13	trafficking protein particle complex 13	398.637	291.349	1.36699	0.450999	0.208902	0.883265
ENSMUSG00000022014	Epsti1	epithelial stromal interaction 1 (breast)	442.53	268.755	1.6442	0.717382	0.208261	0.883265
ENSMUSG00000039458	Mtmr12	myotubularin related protein 12	1173.57	905.163	1.29621	0.374294	0.210101	0.883265
ENSMUSG00000022496	Tnfrsf17	tumor necrosis factor receptor superfamily, member 17	5.49211	0.685383	3.85201	1.94561	0.208939	0.883265
ENSMUSG00000079620	Muc4	mucin 4	28.014	8.86919	2.93986	1.55575	0.210083	0.883265
ENSMUSG00000022831	Hcls1	hematopoietic cell specific Lyn substrate 1	864.699	589.986	1.46484	0.550742	0.209024	0.883265
ENSMUSG00000002017	Fam98a	family with sequence similarity 98, member A	289.583	216.379	1.33676	0.418737	0.209887	0.883265
ENSMUSG00000024431	Nr3c1	nuclear receptor subfamily 3, group C, member 1	2381.57	1864.98	1.27685	0.352583	0.20875	0.883265
ENSMUSG00000001700	Gramd3	GRAM domain containing 3	542.255	369.841	1.46493	0.55083	0.208714	0.883265
ENSMUSG00000024845	Tmem134	transmembrane protein 134	337.137	252.388	1.33446	0.416261	0.209584	0.883265
ENSMUSG00000081087	Rps15a-ps7	ribosomal protein S15A, pseudogene 7	466.117	363.854	1.28029	0.356465	0.209449	0.883265
ENSMUSG00000018209	Stk4	serine/threonine kinase 4	1162.68	890.852	1.30479	0.383817	0.209892	0.883265
ENSMUSG00000000339	Rtca	RNA 3'-terminal phosphate cyclase	142.177	99.8914	1.41912	0.504993	0.21002	0.883265
ENSMUSG00000081559	Gm12411	predicted gene 12411	11.7793	5.11851	2.08864	1.06256	0.208487	0.883265
ENSMUSG00000001166	Oas1c	2'-5' oligoadenylate synthetase 1C	35.7882	21.5527	1.63121	0.705944	0.209048	0.883265
ENSMUSG00000018999	Slc35b4	solute carrier family 35, member B4	942.657	711.603	1.32424	0.405164	0.20942	0.883265
ENSMUSG00000012848	Rps5	ribosomal protein S5	1413.42	1082.62	1.30527	0.384351	0.208753	0.883265
ENSMUSG00000085923	Gm12781	predicted gene 12781	9.16776	3.45559	2.28202	1.19031	0.209948	0.883265
ENSMUSG00000051234	Rnf7	ring finger protein 7	222.644	156.574	1.41929	0.50517	0.209473	0.883265
ENSMUSG00000091058	Gm17538	predicted gene, 17538	228.568	158.49	1.43939	0.525457	0.21023	0.883441
ENSMUSG00000034994	Eef2	eukaryotic translation elongation factor 2	18844.7	14518.4	1.29797	0.376256	0.21097	0.883828
ENSMUSG00000039450	Dcxr	dicarbonyl L-xylulose reductase	664.738	487.937	1.3616	0.445306	0.210749	0.883828
ENSMUSG00000057554	Lgals8	lectin, galactose binding, soluble 8	642.128	489.325	1.31164	0.391368	0.211033	0.883828
ENSMUSG00000021509	Slc25a48	solute carrier family 25, member 48	345.386	264.771	1.30332	0.382196	0.210967	0.883828
ENSMUSG00000028565	Nfia	nuclear factor I/A	1308.47	1006.34	1.29993	0.378438	0.210808	0.883828
ENSMUSG00000034926	Dhcr24	24-dehydrocholesterol reductase	2903.21	2185.28	1.32838	0.409669	0.210885	0.883828
ENSMUSG00000030060	Hmces	5-hydroxymethylcytosine (hmC) binding, ES cell specific	228.764	160.068	1.42651	0.512487	0.210853	0.883828
ENSMUSG00000079426	Arpc4	actin related protein 2/3 complex, subunit 4	579.629	429.766	1.3479	0.430711	0.211058	0.883828
ENSMUSG00000006587	Snai3	snail family zinc finger 3	9.47686	2.67611	2.84999	1.51096	0.210548	0.883828
ENSMUSG00000057933	Gsta2	glutathione S-transferase, alpha 2 (Yc2)	342.297	197.826	1.72662	0.787953	0.210523	0.883828
ENSMUSG00000079283	2310009B15Rik	RIKEN cDNA 2310009B15 gene	48.1325	28.3251	1.67544	0.744541	0.211417	0.88432
ENSMUSG00000039304	Tnfsf10	tumor necrosis factor (ligand) superfamily, member 10	493.719	366.072	1.34774	0.430547	0.211324	0.88432
ENSMUSG00000080896	Gm14567	predicted gene 14567	24.6679	14.5692	1.64863	0.72127	0.211435	0.88432
ENSMUSG00000091580	Gm6467	predicted gene 6467	136.239	95.1879	1.42678	0.512761	0.21148	0.884326
ENSMUSG00000061477	Rps7	ribosomal protein S7	69.8945	45.8953	1.51176	0.596231	0.211643	0.884647
ENSMUSG00000000171	Sdhd	succinate dehydrogenase complex, subunit D, integral membrane protein	1191.61	933.459	1.27625	0.351914	0.212074	0.88554
ENSMUSG00000020178	Adora2a	adenosine A2a receptor	95.0975	41.1451	2.28016	1.18913	0.212127	0.885583
ENSMUSG00000046010	Zfp830	zinc finger protein 830	392.702	294.79	1.33102	0.412532	0.212473	0.885761
ENSMUSG00000001444	Tbx21	T-box 21	159.38	58.7843	2.68265	1.42366	0.212457	0.885761
ENSMUSG00000037966	Ninj1	ninjurin 1	826.779	643.883	1.28361	0.360208	0.212452	0.885761
ENSMUSG00000068299	Nat8f4	N-acetyltransferase 8 (GCN5-related) family member 4	97.0466	69.6228	1.38831	0.473334	0.21245	0.885761
ENSMUSG00000055652	Klhl25	kelch-like 25	102.288	71.7198	1.42035	0.50625	0.212386	0.885761
ENSMUSG00000039660	Spout1	SPOUT domain containing methyltransferase 1	164.233	113.574	1.44215	0.528224	0.212534	0.885832
ENSMUSG00000066677	Ifi208	interferon activated gene 208	123.784	57.4457	2.13503	1.09426	0.212798	0.88586
ENSMUSG00000050002	Idnk	idnK gluconokinase homolog (E. coli)	104.214	71.4402	1.45242	0.538461	0.212887	0.88586
ENSMUSG00000084790	Gm15879	predicted gene 15879	55.6554	34.5055	1.59568	0.674169	0.212748	0.88586
ENSMUSG00000023806	Rsph3b	radial spoke 3B homolog (Chlamydomonas)	178.761	131.93	1.3523	0.435417	0.212681	0.88586
ENSMUSG00000051469	Zfp24	zinc finger protein 24	716.779	546.804	1.31028	0.38988	0.212826	0.88586
ENSMUSG00000038903	Ccdc68	coiled-coil domain containing 68	86.1242	59.8881	1.43089	0.516913	0.212994	0.88586
ENSMUSG00000060224	Pyroxd2	pyridine nucleotide-disulphide oxidoreductase domain 2	918.329	574.887	1.59637	0.674796	0.212954	0.88586
ENSMUSG00000054428	Atpif1	ATPase inhibitory factor 1	1207.59	926.717	1.30275	0.381563	0.212897	0.88586
ENSMUSG00000033036	Gm7879	predicted pseudogene 7879	17.4394	7.04093	2.29319	1.19736	0.213018	0.88586
ENSMUSG00000050174	Nudt6	nudix (nucleoside diphosphate linked moiety X)-type motif 6	62.9357	42.6508	1.46471	0.550613	0.213141	0.886194
ENSMUSG00000026068	Il18rap	interleukin 18 receptor accessory protein	303.471	130.674	2.3123	1.20933	0.213427	0.886366
ENSMUSG00000078193	Gm2000	predicted gene 2000	1449.45	1121.59	1.29206	0.369669	0.213519	0.886366
ENSMUSG00000014243	Zswim7	zinc finger SWIM-type containing 7	26.7324	15.0049	1.73275	0.793062	0.213455	0.886366
ENSMUSG00000025026	Add3	adducin 3 (gamma)	2752.87	2182.69	1.26111	0.334693	0.213491	0.886366
ENSMUSG00000073155	1810058I24Rik	RIKEN cDNA 1810058I24 gene	200.654	146.641	1.36584	0.44979	0.213321	0.886366
ENSMUSG00000034394	Lif	leukemia inhibitory factor	96.7366	38.6632	2.46417	1.3011	0.213604	0.886495
ENSMUSG00000031886	Ces2e	carboxylesterase 2E	74.9223	47.3481	1.57032	0.651063	0.213918	0.887257
ENSMUSG00000020537	Drg2	developmentally regulated GTP binding protein 2	344.559	253.315	1.35878	0.442315	0.214029	0.887356
ENSMUSG00000092500	Gm20400	predicted gene 20400	50.7186	21.3932	2.30956	1.20762	0.213986	0.887356
ENSMUSG00000035842	Ddx11	DEAD/H (Asp-Glu-Ala-Asp/His) box helicase 11	83.9324	55.4291	1.50512	0.589876	0.214328	0.888332
ENSMUSG00000025194	Abcc2	ATP-binding cassette, sub-family C (CFTR/MRP), member 2	3405.06	2319.62	1.46773	0.553591	0.214438	0.888332
ENSMUSG00000025199	Chuk	conserved helix-loop-helix ubiquitous kinase	1616.54	1261.1	1.28162	0.357973	0.214386	0.888332
ENSMUSG00000028062	Lamtor2	late endosomal/lysosomal adaptor, MAPK and MTOR activator 2	350.386	265.749	1.31729	0.397577	0.214532	0.888332
ENSMUSG00000001773	Folh1	folate hydrolase 1	1333.94	957.315	1.39301	0.478204	0.214506	0.888332
ENSMUSG00000082513	Gm15374	predicted gene 15374	19.3264	9.27731	1.9778	0.983894	0.215288	0.888487
ENSMUSG00000005763	Cd247	CD247 antigen	120.691	29.9622	3.93031	1.97464	0.215098	0.888487
ENSMUSG00000026615	Eprs	glutamyl-prolyl-tRNA synthetase	2700.29	2056.77	1.31273	0.392567	0.215551	0.888487
ENSMUSG00000081629	Eif3s6-ps1	eukaryotic translation initiation factor 3, subunit 6, pseudogene 1	169.74	122.462	1.38294	0.467734	0.215311	0.888487
ENSMUSG00000086474	9130204K15Rik	RIKEN cDNA 9130204K15 gene	5.09096	0.663575	3.66137	1.87238	0.215477	0.888487
ENSMUSG00000021607	Mrpl36	mitochondrial ribosomal protein L36	116.046	82.012	1.40999	0.495689	0.215055	0.888487
ENSMUSG00000021631	Mrps36-ps1	mitichondrial ribosomal protein S36, pseudogene 1	132.795	92.7868	1.42658	0.512565	0.215347	0.888487
ENSMUSG00000024044	Epb41l3	erythrocyte membrane protein band 4.1 like 3	745.122	563.528	1.32167	0.402365	0.215645	0.888487
ENSMUSG00000046230	Vps13a	vacuolar protein sorting 13A	1259.08	962.202	1.30822	0.38761	0.215804	0.888487
ENSMUSG00000039021	Ttc16	tetratricopeptide repeat domain 16	22.491	10.019	2.13186	1.09211	0.215414	0.888487
ENSMUSG00000086353	Gm13481	predicted gene 13481	4.6793	0	5.6793	2.50571	0.215081	0.888487
ENSMUSG00000077714	Snord17	small nucleolar RNA, C/D box 17	3872.39	3002.85	1.28947	0.366781	0.215092	0.888487
ENSMUSG00000017929	B4galt5	UDP-Gal:betaGlcNAc beta 1,4-galactosyltransferase, polypeptide 5	1717.26	1279.59	1.34178	0.424143	0.215161	0.888487
ENSMUSG00000028544	Slc5a9	solute carrier family 5 (sodium/glucose cotransporter), member 9	182.202	108.186	1.67788	0.746642	0.215816	0.888487
ENSMUSG00000063015	Ccni	cyclin I	1725.98	1315.64	1.31166	0.391392	0.215779	0.888487
ENSMUSG00000066278	Vps37b	vacuolar protein sorting 37B	1085.9	513.63	2.11201	1.07862	0.215899	0.888487
[truncated: 7,854 more rows]

## Sheet: up_young_male
Table S3 Differentially expressed genes, aged male vs. young male mice CoRL, up in young/down in aged
gene.id	gene.symbol	gene.name	Aged	Young	foldChange	log2FoldChange	pval	padj
ENSMUSG00000031461	Myom2	myomesin 2	26.4677	278.094	0.0984172	-3.34495	2.09866e-17	1.4287e-13
ENSMUSG00000022665	Ccdc80	coiled-coil domain containing 80	101.881	765.426	0.134235	-2.89716	2.51613e-16	1.28467e-12
ENSMUSG00000017817	Jph2	junctophilin 2	8.32154	146.082	0.0633767	-3.9799	1.52826e-14	6.24232e-11
ENSMUSG00000031465	Angpt2	angiopoietin 2	162.578	857.296	0.190585	-2.39149	1.19265e-12	4.05959e-09
ENSMUSG00000006649	Nphs1	nephrosis 1, nephrin	13.463	145.663	0.0986137	-3.34207	1.70966e-12	4.98805e-09
ENSMUSG00000046618	Olfml2a	olfactomedin-like 2A	22.763	186.382	0.126816	-2.97919	1.49996e-11	3.82922e-08
ENSMUSG00000026602	Nphs2	nephrosis 2, podocin	46.6096	508.038	0.0935285	-3.41845	2.95418e-11	6.70369e-08
ENSMUSG00000038463	Olfml2b	olfactomedin-like 2B	20.4688	156.144	0.136619	-2.87177	1.70279e-10	3.16147e-07
ENSMUSG00000027204	Fbn1	fibrillin 1	123.92	543.214	0.229541	-2.12317	4.80409e-10	8.08451e-07
ENSMUSG00000029675	Eln	elastin	43.6375	309.41	0.143802	-2.79785	5.31761e-10	8.08451e-07
ENSMUSG00000024620	Pdgfrb	platelet derived growth factor receptor, beta polypeptide	151.967	634.57	0.240677	-2.05483	2.49517e-09	3.39726e-06
ENSMUSG00000033460	Armcx1	armadillo repeat containing, X-linked 1	35.0903	187.882	0.191073	-2.38781	3.43675e-09	4.3868e-06
ENSMUSG00000041734	Kirrel	kin of IRRE like (Drosophila)	38.1593	202.884	0.192066	-2.38032	3.76687e-09	4.52534e-06
ENSMUSG00000034981	Parm1	prostate androgen-regulated mucin-like protein 1	153.089	615.696	0.249863	-2.00079	4.07097e-09	4.61896e-06
ENSMUSG00000038765	Lmx1b	LIM homeobox transcription factor 1 beta	1.78525	55.4687	0.0493237	-4.34157	4.43433e-09	4.76644e-06
ENSMUSG00000029082	Bst1	bone marrow stromal cell antigen 1	73.3138	311.665	0.237679	-2.07292	5.5994e-09	5.71783e-06
ENSMUSG00000016458	Wt1	Wilms tumor 1 homolog	12.7507	103.66	0.131385	-2.92813	6.49048e-09	6.31215e-06
ENSMUSG00000005220	Corin	corin	52.552	338.945	0.157531	-2.66629	1.05536e-08	9.79707e-06
ENSMUSG00000048126	Col6a3	collagen, type VI, alpha 3	135.129	517.99	0.262297	-1.93073	1.59064e-08	1.41242e-05
ENSMUSG00000032648	Pygm	muscle glycogen phosphorylase	28.5368	159.535	0.18399	-2.4423	2.08322e-08	1.66581e-05
ENSMUSG00000059146	Ntrk3	neurotrophic tyrosine kinase, receptor, type 3	4.47873	154	0.0353466	-4.82228	2.1207e-08	1.66581e-05
ENSMUSG00000034898	Filip1	filamin A interacting protein 1	79.706	572.02	0.140843	-2.82784	1.99297e-08	1.66581e-05
ENSMUSG00000032744	Heyl	hairy/enhancer-of-split related with YRPW motif-like	39.0927	183.566	0.217227	-2.20273	2.86139e-08	2.16438e-05
ENSMUSG00000027955	Fam198b	family with sequence similarity 198, member B	35.1903	185.001	0.19457	-2.36164	4.31956e-08	3.15066e-05
ENSMUSG00000040488	Ltbp4	latent transforming growth factor beta binding protein 4	495.575	1563.67	0.317368	-1.65577	9.18237e-08	6.25105e-05
ENSMUSG00000008734	Gprc5b	G protein-coupled receptor, family C, group 5, member B	92.4416	361.301	0.257911	-1.95505	8.98414e-08	6.25105e-05
ENSMUSG00000036545	Adamts2	a disintegrin-like and metallopeptidase (reprolysin type) with thrombospondin type 1 motif, 2	43.0647	205.605	0.21328	-2.22918	1.06464e-07	6.7947e-05
ENSMUSG00000018593	Sparc	secreted acidic cysteine rich glycoprotein	693.752	2164.19	0.320874	-1.63992	1.06245e-07	6.7947e-05
ENSMUSG00000024552	Slc14a2	solute carrier family 14 (urea transporter), member 2	597.663	2236.29	0.267583	-1.90194	1.26629e-07	7.8368e-05
ENSMUSG00000026840	Lamc3	laminin gamma 3	54.3076	213.363	0.258009	-1.95451	1.36534e-07	8.2013e-05
ENSMUSG00000020542	Myocd	myocardin	11.5135	167.915	0.0740813	-3.75475	1.47746e-07	8.3817e-05
ENSMUSG00000022816	Fstl1	follistatin-like 1	286.504	893.141	0.321543	-1.63692	1.86411e-07	0.000102894
ENSMUSG00000007655	Cav1	caveolin 1, caveolae protein	181.748	620.418	0.294082	-1.76571	2.0856e-07	0.00011209
ENSMUSG00000050010	Shisa3	shisa family member 3	40.2997	180.646	0.227364	-2.13692	2.46872e-07	0.000128911
ENSMUSG00000059213	Ddn	dendrin	14.4221	88.6528	0.172021	-2.53935	2.81507e-07	0.000134612
ENSMUSG00000059336	Slc14a1	solute carrier family 14 (urea transporter), member 1	79.7987	509.494	0.158275	-2.65949	2.8342e-07	0.000134612
ENSMUSG00000038146	Notch3	notch 3	111.136	1205.02	0.0929804	-3.42693	3.46668e-07	0.000160909
ENSMUSG00000028031	Dkk2	dickkopf WNT signaling pathway inhibitor 2	243.099	818.813	0.297749	-1.74783	4.01197e-07	0.000182081
ENSMUSG00000041482	Piezo2	piezo-type mechanosensitive ion channel component 2	98.093	348.847	0.283247	-1.81987	4.60898e-07	0.000204629
ENSMUSG00000026620	Mark1	MAP/microtubule affinity regulating kinase 1	22.3446	202.126	0.114927	-3.12122	5.2305e-07	0.000227282
ENSMUSG00000050315	Synpo2	synaptopodin 2	32.2255	336.55	0.0984314	-3.34474	6.03158e-07	0.000248142
ENSMUSG00000050640	Tmem150c	transmembrane protein 150C	43.8605	172.452	0.258634	-1.95102	6.07507e-07	0.000248142
ENSMUSG00000052911	Lamb2	laminin, beta 2	793.79	2313.26	0.343431	-1.54191	5.89341e-07	0.000248142
ENSMUSG00000067818	Myl9	myosin, light polypeptide 9, regulatory	90.4909	1158.52	0.078904	-3.66376	7.41522e-07	0.000296943
ENSMUSG00000074796	Slc4a11	solute carrier family 4, sodium bicarbonate transporter-like, member 11	73.664	261.596	0.284331	-1.81436	9.53004e-07	0.000374292
ENSMUSG00000021388	Aspn	asporin	6.24519	59.1896	0.120373	-3.05442	9.99752e-07	0.00037811
ENSMUSG00000015627	Gata5	GATA binding protein 5	16.998	93.8795	0.189694	-2.39826	9.83156e-07	0.00037811
ENSMUSG00000022840	Adcy5	adenylate cyclase 5	60.7873	338.211	0.18215	-2.4568	1.13621e-06	0.000421907
ENSMUSG00000057914	Cacnb2	calcium channel, voltage-dependent, beta 2 subunit	39.0348	176.919	0.225017	-2.15189	1.194e-06	0.000435446
ENSMUSG00000026398	Nr5a2	nuclear receptor subfamily 5, group A, member 2	3.46534	43.7559	0.0997709	-3.32524	1.32236e-06	0.000473799
ENSMUSG00000018604	Tbx3	T-box 3	146.902	614.387	0.240339	-2.05686	1.38949e-06	0.000489268
ENSMUSG00000048583	Igf2	insulin-like growth factor 2	47.2846	182.936	0.262507	-1.92957	1.49724e-06	0.000518273
ENSMUSG00000068196	Col8a1	collagen, type VIII, alpha 1	64.5133	235.352	0.277186	-1.85108	1.58275e-06	0.000538741
ENSMUSG00000021719	Rgs7bp	regulator of G-protein signalling 7 binding protein	14.9225	246.768	0.0642637	-3.95985	1.64326e-06	0.000550168
ENSMUSG00000041324	Inhba	inhibin beta-A	3.65239	47.0055	0.0969137	-3.36716	1.7231e-06	0.000567595
ENSMUSG00000049265	Kcnk3	potassium channel, subfamily K, member 3	4.35458	49.2884	0.106478	-3.23138	1.92381e-06	0.000623652
ENSMUSG00000067586	S1pr3	sphingosine-1-phosphate receptor 3	39.8371	425.395	0.0957731	-3.38424	2.40121e-06	0.000766249
ENSMUSG00000024011	Pi16	peptidase inhibitor 16	234.873	691.368	0.340676	-1.55353	2.48289e-06	0.000780125
ENSMUSG00000026837	Col5a1	collagen, type V, alpha 1	65.5481	254.944	0.26001	-1.94336	2.70087e-06	0.000835756
ENSMUSG00000040856	Dlk1	delta-like 1 homolog (Drosophila)	2.43656	42.7348	0.0785771	-3.66975	2.79282e-06	0.00083879
ENSMUSG00000018830	Myh11	myosin, heavy polypeptide 11, smooth muscle	619.515	12617.6	0.0491746	-4.34594	2.78517e-06	0.00083879
ENSMUSG00000029641	Rasl11a	RAS-like, family 11, member A	44.0312	154.721	0.289179	-1.78997	2.86897e-06	0.000849175
ENSMUSG00000032875	Arhgef17	Rho guanine nucleotide exchange factor (GEF) 17	646.296	1733.46	0.373198	-1.42199	3.11765e-06	0.000909598
ENSMUSG00000032289	Thsd4	thrombospondin, type I, domain containing 4	165.491	658.363	0.252502	-1.98563	3.58123e-06	0.00103013
ENSMUSG00000005124	Wisp1	WNT1 inducible signaling pathway protein 1	40.3389	168.731	0.243556	-2.03767	3.79297e-06	0.00107589
ENSMUSG00000041731	Pgm5	phosphoglucomutase 5	35.1244	131.256	0.27314	-1.87229	3.94513e-06	0.00109967
ENSMUSG00000074364	Ehd2	EH-domain containing 2	294.514	951.933	0.31011	-1.68915	3.98452e-06	0.00109967
ENSMUSG00000020866	Cacna1g	calcium channel, voltage-dependent, T type, alpha 1G subunit	18.7786	95.0589	0.205901	-2.27998	4.51162e-06	0.00116694
ENSMUSG00000039601	Rcan2	regulator of calcineurin 2	173.112	603.33	0.288108	-1.79532	4.48669e-06	0.00116694
ENSMUSG00000052430	Bmpr1b	bone morphogenetic protein receptor, type 1B	74.5439	241.742	0.31121	-1.68404	4.51394e-06	0.00116694
ENSMUSG00000066113	Adamtsl1	ADAMTS-like 1	32.6957	241.683	0.138847	-2.84843	4.43715e-06	0.00116694
ENSMUSG00000059974	Ntm	neurotrimin	0.622381	25.5618	0.0610795	-4.03317	4.49533e-06	0.00116694
ENSMUSG00000037577	Ephx3	epoxide hydrolase 3	3.03677	38.9772	0.100977	-3.3079	4.88144e-06	0.00123078
ENSMUSG00000040260	Daam2	dishevelled associated activator of morphogenesis 2	126.919	466.178	0.273812	-1.86874	5.22475e-06	0.00130128
ENSMUSG00000030020	Prickle2	prickle planar cell polarity protein 2	126.039	381.617	0.332026	-1.59063	5.5022e-06	0.00134112
ENSMUSG00000031997	Trpc6	transient receptor potential cation channel, subfamily C, member 6	6.09233	96.1781	0.0729828	-3.7763	5.51602e-06	0.00134112
ENSMUSG00000026535	Ifi202b	interferon activated gene 202B	1.40101	43.7331	0.0536741	-4.21963	6.07416e-06	0.00140969
ENSMUSG00000022123	Scel	sciellin	96.278	283.635	0.341764	-1.54893	6.04445e-06	0.00140969
ENSMUSG00000030409	Dmpk	dystrophia myotonica-protein kinase	98.4841	402.012	0.246851	-2.01829	6.01709e-06	0.00140969
ENSMUSG00000020123	Avpr1a	arginine vasopressin receptor 1A	50.3621	168.733	0.302606	-1.72449	6.66095e-06	0.0015285
ENSMUSG00000041020	Map7d2	MAP7 domain containing 2	0.933571	27.0048	0.0690442	-3.85634	6.83186e-06	0.0015503
ENSMUSG00000022883	Robo1	roundabout guidance receptor 1	25.0597	100.908	0.255717	-1.96738	7.49001e-06	0.00164518
ENSMUSG00000040852	Plekhh2	pleckstrin homology domain containing, family H (with MyTH4 domain) member 2	39.5816	143.505	0.280831	-1.83222	7.49166e-06	0.00164518
ENSMUSG00000035783	Acta2	actin, alpha 2, smooth muscle, aorta	186.912	3361.28	0.0558882	-4.16131	7.34547e-06	0.00164518
ENSMUSG00000051236	Msrb3	methionine sulfoxide reductase B3	159.599	608.522	0.263484	-1.92421	7.77549e-06	0.00168935
ENSMUSG00000041540	Sox5	SRY (sex determining region Y)-box 5	60.1425	186.948	0.325315	-1.62009	8.02482e-06	0.00172517
ENSMUSG00000028464	Tpm2	tropomyosin 2, beta	110.441	1203.86	0.0924932	-3.43451	8.79434e-06	0.0018709
ENSMUSG00000037166	Ppp1r14a	protein phosphatase 1, regulatory (inhibitor) subunit 14A	5.46995	70.9291	0.0899489	-3.47475	9.00922e-06	0.00188856
ENSMUSG00000051243	Islr2	immunoglobulin superfamily containing leucine-rich repeat 2	41.0245	152.901	0.273062	-1.8727	9.06226e-06	0.00188856
ENSMUSG00000048065	Cyb5r2	cytochrome b5 reductase 2	1.65455	29.6126	0.0867141	-3.52759	9.50394e-06	0.0019606
ENSMUSG00000022306	Zfpm2	zinc finger protein, multitype 2	20.0234	91.6489	0.226914	-2.13978	9.84044e-06	0.00197385
ENSMUSG00000068699	Flnc	filamin C, gamma	2.56595	35.7127	0.0971313	-3.36392	1.00514e-05	0.00197385
ENSMUSG00000045534	Kcna5	potassium voltage-gated channel, shaker-related subfamily, member 5	8.77904	128.31	0.0756247	-3.725	9.98547e-06	0.00197385
ENSMUSG00000031075	Ano1	anoctamin 1, calcium activated chloride channel	36.4229	276.04	0.135081	-2.8881	9.72227e-06	0.00197385
ENSMUSG00000049907	Rasl11b	RAS-like, family 11, member B	51.4553	182.331	0.286123	-1.80529	1.03155e-05	0.00198749
ENSMUSG00000043496	Tril	TLR4 interactor with leucine-rich repeats	63.4348	232.211	0.276293	-1.85573	1.03132e-05	0.00198749
ENSMUSG00000048332	Lhfp	lipoma HMGIC fusion partner	35.4292	137.287	0.263432	-1.9245	1.07672e-05	0.00205513
ENSMUSG00000004085	Zak	sterile alpha motif and leucine zipper containing kinase AZK	340.337	1241.74	0.274666	-1.86425	1.0974e-05	0.0020752
ENSMUSG00000058145	Adamts17	a disintegrin-like and metallopeptidase (reprolysin type) with thrombospondin type 1 motif, 17	0.193811	22.2013	0.0514544	-4.28056	1.14759e-05	0.0021502
ENSMUSG00000029334	Prkg2	protein kinase, cGMP-dependent, type II	13.5502	244.575	0.0592494	-4.07706	1.21777e-05	0.00226096
ENSMUSG00000001870	Ltbp1	latent transforming growth factor beta binding protein 1	191.058	779.279	0.24614	-2.02245	1.24639e-05	0.00229325
ENSMUSG00000035187	Nkx6-1	NK6 homeobox 1	0	40.3745	0.0241695	-5.37067	1.32838e-05	0.00240083
ENSMUSG00000032502	Stac	src homology three (SH3) and cysteine rich domain	7.354	46.436	0.176111	-2.50544	1.32429e-05	0.00240083
ENSMUSG00000002265	Peg3	paternally expressed 3	216.911	733.886	0.296523	-1.75378	1.42101e-05	0.00254573
ENSMUSG00000007097	Atp1a2	ATPase, Na+/K+ transporting, alpha 2 polypeptide	38.3516	254.342	0.154113	-2.69794	1.46582e-05	0.00255283
ENSMUSG00000061603	Akap6	A kinase (PRKA) anchor protein 6	16.3845	320.844	0.0540153	-4.21049	1.47854e-05	0.00255283
ENSMUSG00000039385	Cdh6	cadherin 6	63.6675	211.733	0.303985	-1.71793	1.48747e-05	0.00255283
ENSMUSG00000028339	Col15a1	collagen, type XV, alpha 1	201.069	556.759	0.362288	-1.46479	1.47765e-05	0.00255283
ENSMUSG00000024529	Lox	lysyl oxidase	12.8668	149.964	0.0918551	-3.4445	1.62495e-05	0.00274267
ENSMUSG00000025324	Atp10a	ATPase, class V, type 10A	72.3346	245.559	0.297432	-1.74937	1.62001e-05	0.00274267
ENSMUSG00000020241	Col6a2	collagen, type VI, alpha 2	147.892	437.293	0.339708	-1.55763	1.76733e-05	0.00295854
ENSMUSG00000031636	Pdlim3	PDZ and LIM domain 3	33.4308	201.694	0.169866	-2.55753	1.82068e-05	0.00302307
ENSMUSG00000004044	Ptrf	polymerase I and transcript release factor	646.705	1958.02	0.330628	-1.59672	1.84059e-05	0.00303148
ENSMUSG00000045680	Tcf21	transcription factor 21	8.92852	58.1954	0.167725	-2.57583	1.86861e-05	0.00305301
ENSMUSG00000040118	Cacna2d1	calcium channel, voltage-dependent, alpha2/delta subunit 1	23.3627	117.271	0.205991	-2.27935	1.95893e-05	0.00315018
ENSMUSG00000039607	Rbms3	RNA binding motif, single stranded interacting protein	116.587	365.558	0.320788	-1.64031	1.95449e-05	0.00315018
ENSMUSG00000031595	Pdgfrl	platelet-derived growth factor receptor-like	6.95623	46.7459	0.166637	-2.58522	2.04369e-05	0.00326081
ENSMUSG00000032911	Cspg4	chondroitin sulfate proteoglycan 4	273.475	759.158	0.361076	-1.46962	2.09748e-05	0.00332068
ENSMUSG00000021798	Ldb3	LIM domain binding 3	7.0105	187.754	0.0424387	-4.55847	2.1211e-05	0.00333225
ENSMUSG00000034520	Gjc1	gap junction protein, gamma 1	40.354	160.018	0.256828	-1.96112	2.23922e-05	0.00346451
ENSMUSG00000057123	Gja5	gap junction protein, alpha 5	136.215	364.85	0.375059	-1.41481	2.26161e-05	0.00347284
ENSMUSG00000032366	Tpm1	tropomyosin 1, alpha	967.296	2670.3	0.362481	-1.46402	2.29893e-05	0.00350381
ENSMUSG00000051331	Cacna1c	calcium channel, voltage-dependent, L type, alpha 1C subunit	15.4173	257.886	0.0634152	-3.97903	2.41378e-05	0.0036516
ENSMUSG00000037016	Frem2	Fras1 related extracellular matrix protein 2	177.563	462.201	0.385499	-1.3752	2.60046e-05	0.00390509
ENSMUSG00000038530	Rgs4	regulator of G-protein signaling 4	11.8977	217.644	0.0589895	-4.0834	2.79813e-05	0.00411666
ENSMUSG00000026674	Ddr2	discoidin domain receptor family, member 2	51.0829	171.695	0.301589	-1.72934	2.79993e-05	0.00411666
ENSMUSG00000021061	Sptb	spectrin beta, erythrocytic	148.902	396.792	0.376836	-1.40799	2.80182e-05	0.00411666
ENSMUSG00000031825	Crispld2	cysteine-rich secretory protein LCCL domain containing 2	44.8939	144.451	0.315529	-1.66415	2.86281e-05	0.00417622
ENSMUSG00000015143	Actn1	actinin, alpha 1	500.688	1620.96	0.309309	-1.69288	3.06105e-05	0.00443338
ENSMUSG00000029309	Sparcl1	SPARC-like 1	427.16	3937.46	0.108713	-3.20141	3.08251e-05	0.00443338
ENSMUSG00000023336	Wfdc1	WAP four-disulfide core domain 1	10.9931	54.8666	0.214673	-2.21978	3.32854e-05	0.00475377
ENSMUSG00000037664	Cdkn1c	cyclin-dependent kinase inhibitor 1C (P57)	71.9614	234.211	0.310196	-1.68875	3.35899e-05	0.00476393
ENSMUSG00000031616	Ednra	endothelin receptor type A	13.2491	137.652	0.102769	-3.28252	3.3978e-05	0.00478574
ENSMUSG00000056602	Fry	FRY microtubule binding protein	456.255	1610.31	0.283779	-1.81716	3.56536e-05	0.00498735
ENSMUSG00000026494	Kif26b	kinesin family member 26B	61.095	225.822	0.273761	-1.86901	3.77516e-05	0.00517451
ENSMUSG00000075592	Nynrin	NYN domain and retroviral integrase containing	65.5755	203.029	0.326304	-1.61571	3.76151e-05	0.00517451
ENSMUSG00000041117	Ccdc8	coiled-coil domain containing 8	13.9002	66.5269	0.220656	-2.18013	3.84601e-05	0.00523647
ENSMUSG00000034771	Tle2	transducin-like enhancer of split 2	104.179	279.114	0.375486	-1.41317	4.01329e-05	0.00539233
ENSMUSG00000052727	Map1b	microtubule-associated protein 1B	284.269	692.502	0.411346	-1.28158	4.05589e-05	0.00541395
ENSMUSG00000004891	Nes	nestin	433.21	1249	0.347368	-1.52546	4.20224e-05	0.00553693
ENSMUSG00000031561	Tenm3	teneurin transmembrane protein 3	36.7699	134.899	0.277926	-1.84723	4.39336e-05	0.00575164
ENSMUSG00000048096	Lmod1	leiomodin 1 (smooth muscle)	69.8059	553.768	0.127632	-2.96994	4.51793e-05	0.00587704
ENSMUSG00000021614	Vcan	versican	42.1871	180.264	0.238256	-2.06942	4.67974e-05	0.00597339
ENSMUSG00000024998	Plce1	phospholipase C, epsilon 1	67.1022	422.837	0.16068	-2.63774	4.66002e-05	0.00597339
ENSMUSG00000032085	Tagln	transgelin	118.186	1061.42	0.112183	-3.15608	4.62451e-05	0.00597339
ENSMUSG00000070645	Ren1	renin 1 structural	57.7026	778.87	0.0752723	-3.73174	4.71321e-05	0.00597875
ENSMUSG00000007872	Id3	inhibitor of DNA binding 3	245.315	613.358	0.40093	-1.31858	4.97788e-05	0.00627551
ENSMUSG00000058806	Col13a1	collagen, type XIII, alpha 1	1.95034	25.8075	0.110056	-3.18368	5.02546e-05	0.00629663
ENSMUSG00000014846	Tppp3	tubulin polymerization-promoting protein family member 3	27.1612	102.74	0.27146	-1.88119	5.13888e-05	0.00639948
ENSMUSG00000025608	Podxl	podocalyxin-like	2213.83	6047.19	0.366197	-1.44931	5.37139e-05	0.00660843
ENSMUSG00000028476	Reck	reversion-inducing-cysteine-rich protein with kazal motifs	61.7249	195.401	0.319372	-1.64669	5.47576e-05	0.00669649
ENSMUSG00000021390	Ogn	osteoglycin	51.5271	166.256	0.314052	-1.67093	5.71673e-05	0.00690845
ENSMUSG00000005611	Mrvi1	MRV integration site 1	58.1572	460.419	0.128207	-2.96345	5.81941e-05	0.00696138
ENSMUSG00000025375	Aatk	apoptosis-associated tyrosine kinase	41.9131	137.731	0.309325	-1.6928	5.93348e-05	0.00704531
ENSMUSG00000028763	Hspg2	perlecan (heparan sulfate proteoglycan 2)	1987.43	4899.09	0.405794	-1.30118	6.03425e-05	0.00712355
ENSMUSG00000017446	C1qtnf1	C1q and tumor necrosis factor related protein 1	28.2215	104.014	0.278262	-1.84549	6.40291e-05	0.00751532
ENSMUSG00000023013	Aqp2	aquaporin 2	541.745	1335.69	0.406036	-1.30032	6.55609e-05	0.00764704
ENSMUSG00000032332	Col12a1	collagen, type XII, alpha 1	230.533	1002.89	0.230634	-2.11632	6.75428e-05	0.00779337
ENSMUSG00000029761	Cald1	caldesmon 1	827.437	3582.74	0.231165	-2.113	7.00571e-05	0.00803806
ENSMUSG00000086596	Susd5	sushi domain containing 5	13.0232	218.191	0.0639772	-3.9663	7.20223e-05	0.00821738
ENSMUSG00000016995	Matn4	matrilin 4	12.3565	55.0418	0.238331	-2.06896	7.40699e-05	0.00840405
ENSMUSG00000002831	Plin4	perilipin 4	52.9735	201.024	0.267164	-1.9042	7.64121e-05	0.00852768
ENSMUSG00000038295	Atg9b	autophagy related 9B	8.93846	55.0458	0.177327	-2.49551	7.61271e-05	0.00852768
ENSMUSG00000045103	Dmd	dystrophin, muscular dystrophy	173.953	974.826	0.179287	-2.47966	7.63721e-05	0.00852768
ENSMUSG00000026207	Speg	SPEG complex locus	69.1613	309.331	0.226085	-2.14506	7.69545e-05	0.00853899
ENSMUSG00000061991	Hist1h2af	histone cluster 1, H2af	24.9836	95.8048	0.268412	-1.89748	7.77678e-05	0.00853899
ENSMUSG00000031596	Slc7a2	solute carrier family 7 (cationic amino acid transporter, y+ system), member 2	61.4243	190.359	0.326215	-1.61611	7.75172e-05	0.00853899
ENSMUSG00000019997	Ctgf	connective tissue growth factor	391.489	1180.87	0.332092	-1.59035	7.86447e-05	0.00858909
ENSMUSG00000064080	Fbln2	fibulin 2	195.245	535.937	0.365489	-1.4521	8.33897e-05	0.00905887
ENSMUSG00000066842	Hmcn1	hemicentin 1	17.6191	72.3582	0.253811	-1.97817	9.01678e-05	0.00964975
ENSMUSG00000034810	Scn7a	sodium channel, voltage-gated, type VII, alpha	41.2524	200.375	0.209819	-2.25278	9.02464e-05	0.00964975
ENSMUSG00000043079	Synpo	synaptopodin	377.446	1495.8	0.252838	-1.98372	9.13608e-05	0.00971803
ENSMUSG00000024247	Pkdcc	protein kinase domain containing, cytoplasmic	85.3782	236.701	0.363389	-1.46041	9.33709e-05	0.00988039
ENSMUSG00000040998	Npnt	nephronectin	1204.97	2678.83	0.450018	-1.15195	9.59109e-05	0.0100451
ENSMUSG00000031273	Col4a6	collagen, type IV, alpha 6	27.94	99	0.2894	-1.78886	9.5872e-05	0.0100451
ENSMUSG00000015053	Gata2	GATA binding protein 2	357.632	878.716	0.407668	-1.29453	9.84196e-05	0.0102552
ENSMUSG00000026073	Il1r2	interleukin 1 receptor, type II	22.7803	89.8792	0.261669	-1.93418	0.000101055	0.010329
ENSMUSG00000028681	Ptch2	patched 2	10.9444	60.2792	0.194917	-2.35907	0.000100563	0.010329
ENSMUSG00000070423	Olfr558	olfactory receptor 558	13.8976	149.969	0.0986804	-3.34109	0.000100126	0.010329
ENSMUSG00000037060	Prkcdbp	protein kinase C, delta binding protein	94.8319	239.59	0.398321	-1.328	0.000101151	0.010329
ENSMUSG00000032334	Loxl1	lysyl oxidase-like 1	51.7844	155.489	0.337305	-1.56787	0.000105545	0.0107241
ENSMUSG00000031841	Cdh13	cadherin 13	35.5376	107.474	0.336833	-1.56989	0.000108054	0.0109246
ENSMUSG00000024043	Arhgap28	Rho GTPase activating protein 28	15.669	60.9983	0.268862	-1.89506	0.000115494	0.0115624
ENSMUSG00000037621	Atoh8	atonal bHLH transcription factor 8	27.8957	95.0747	0.300763	-1.7333	0.000119465	0.0119016
ENSMUSG00000078794	Dact3	dishevelled-binding antagonist of beta-catenin 3	11.3275	55.3558	0.218744	-2.19268	0.000120184	0.0119151
ENSMUSG00000042485	Mustn1	musculoskeletal, embryonic nuclear protein 1	10.6052	157.173	0.0733704	-3.76866	0.000121181	0.0119559
ENSMUSG00000082542	Gm13311	predicted gene 13311	0.409787	17.5839	0.0758605	-3.72051	0.000121767	0.011956
ENSMUSG00000058571	Gpc6	glypican 6	36.5371	498.041	0.0752184	-3.73277	0.000124899	0.0120321
ENSMUSG00000032625	Thsd7a	thrombospondin, type I, domain containing 7A	212.843	572.149	0.373101	-1.42236	0.000123176	0.0120321
ENSMUSG00000057604	Lmcd1	LIM and cysteine-rich domains 1	127.984	313.091	0.410659	-1.28399	0.000123824	0.0120321
ENSMUSG00000032060	Cryab	crystallin, alpha B	395.965	957.249	0.414261	-1.27139	0.000124429	0.0120321
ENSMUSG00000063296	Tmem117	transmembrane protein 117	62.4374	168.252	0.37481	-1.41577	0.00012955	0.0124216
ENSMUSG00000085180	AI838599	expressed sequence AI838599	37.6684	119.817	0.320059	-1.64359	0.000132171	0.0126137
ENSMUSG00000021461	Fancc	Fanconi anemia, complementation group C	152.921	390.041	0.39362	-1.34513	0.000137337	0.0129949
ENSMUSG00000028005	Gucy1b3	guanylate cyclase 1, soluble, beta 3	24.5023	171.188	0.148107	-2.75529	0.000137438	0.0129949
ENSMUSG00000029838	Ptn	pleiotrophin	29.4012	103.249	0.291622	-1.77783	0.000140258	0.0132004
ENSMUSG00000038132	Rbm24	RNA binding motif protein 24	2.95696	69.7989	0.0558901	-4.16126	0.000145411	0.0136226
ENSMUSG00000020121	Srgap1	SLIT-ROBO Rho GTPase activating protein 1	77.6334	210.203	0.372313	-1.42541	0.000150073	0.0139952
ENSMUSG00000052632	Asap2	ArfGAP with SH3 domain, ankyrin repeat and PH domain 2	341.276	776.802	0.440055	-1.18425	0.000154237	0.0141891
ENSMUSG00000021904	Sema3g	sema domain, immunoglobulin domain (Ig), short basic domain, secreted, (semaphorin) 3G	512.444	1381.66	0.371346	-1.42917	0.000154032	0.0141891
ENSMUSG00000031375	Bgn	biglycan	614.154	1371.82	0.448094	-1.15813	0.000155134	0.0142076
ENSMUSG00000073557	Ppp1r12b	protein phosphatase 1, regulatory (inhibitor) subunit 12B	516.85	1230.5	0.420503	-1.24981	0.000162034	0.0146846
ENSMUSG00000042439	Zfp532	zinc finger protein 532	125.272	372.692	0.337903	-1.56532	0.000163147	0.0146846
ENSMUSG00000003411	Rab3b	RAB3B, member RAS oncogene family	0.193811	16.5382	0.0680694	-3.87685	0.000162023	0.0146846
ENSMUSG00000036570	Fxyd1	FXYD domain-containing ion transport regulator 1	7.20093	58.0923	0.138782	-2.84911	0.000163218	0.0146846
ENSMUSG00000027276	Jag1	jagged 1	655.963	1795.43	0.365705	-1.45125	0.000168882	0.0151276
ENSMUSG00000053617	Sh3pxd2a	SH3 and PX domains 2A	552.12	1233.58	0.448025	-1.15835	0.000173749	0.0154955
ENSMUSG00000070436	Serpinh1	serine (or cysteine) peptidase inhibitor, clade H, member 1	932.311	2000.61	0.466281	-1.10073	0.000177627	0.0157725
ENSMUSG00000045319	Proser2	proline and serine rich 2	34.8589	103.252	0.343964	-1.53967	0.00017853	0.0157841
ENSMUSG00000071347	C1qtnf9	C1q and tumor necrosis factor related protein 9	11.6984	55.3005	0.225547	-2.1485	0.000185713	0.0163484
ENSMUSG00000039110	Mycbpap	MYCBP associated protein	54.388	171.148	0.321747	-1.636	0.000186655	0.0163608
ENSMUSG00000037989	Wnk2	WNK lysine deficient protein kinase 2	41.6079	130.158	0.32486	-1.62211	0.0001989	0.0171398
ENSMUSG00000061808	Ttr	transthyretin	310.153	823.709	0.377289	-1.40626	0.000198803	0.0171398
ENSMUSG00000016918	Sulf1	sulfatase 1	28.1946	99.4713	0.290577	-1.78301	0.000210059	0.017892
ENSMUSG00000029563	Foxp2	forkhead box P2	4.91723	39.31	0.146793	-2.76814	0.000211133	0.017892
ENSMUSG00000092837	Rpph1	ribonuclease P RNA component H1	23372.7	51349.9	0.455177	-1.1355	0.000213599	0.0180262
ENSMUSG00000026208	Des	desmin	58.6704	231.8	0.256316	-1.964	0.00021507	0.0180756
ENSMUSG00000079243	Xirp1	xin actin-binding repeat containing 1	11.923	190.642	0.0674332	-3.8904	0.00021656	0.0181263
ENSMUSG00000003665	Has1	hyaluronan synthase1	15.0346	54.6021	0.288381	-1.79395	0.000219622	0.0183075
ENSMUSG00000031626	Sorbs2	sorbin and SH3 domain containing 2	403.646	1591.83	0.254042	-1.97686	0.000227677	0.0189018
ENSMUSG00000075254	Heg1	heart development protein with EGF-like domains 1	1990.52	4864.2	0.40934	-1.28863	0.000232728	0.019243
ENSMUSG00000046768	Rhoj	ras homolog family member J	78.8277	348.696	0.228277	-2.13114	0.000234355	0.0192993
ENSMUSG00000071847	Apcdd1	adenomatosis polyposis coli down-regulated 1	7.68376	45.4069	0.187122	-2.41795	0.000241775	0.0198129
ENSMUSG00000030268	Bcat1	branched chain aminotransferase 1, cytosolic	61.4571	197.932	0.313962	-1.67134	0.000242531	0.0198129
ENSMUSG00000006576	Slc4a3	solute carrier family 4 (anion exchanger), member 3	172.645	468.893	0.369541	-1.43619	0.000247242	0.0200374
ENSMUSG00000050288	Fzd2	frizzled class receptor 2	9.54435	48.3325	0.21374	-2.22607	0.000254276	0.0204452
ENSMUSG00000018486	Wnt9b	wingless-type MMTV integration site family, member 9B	29.6256	92.5452	0.327388	-1.61093	0.000254079	0.0204452
ENSMUSG00000040280	Ndufa4l2	NADH dehydrogenase (ubiquinone) 1 alpha subcomplex, 4-like 2	4.90391	34.2082	0.167686	-2.57617	0.000257038	0.0205862
ENSMUSG00000026566	Mpzl1	myelin protein zero-like 1	127.251	298.138	0.428734	-1.22185	0.00025901	0.0206632
ENSMUSG00000040543	Pitpnm3	PITPNM family member 3	103.22	242	0.428887	-1.22133	0.000261852	0.0207279
ENSMUSG00000062980	Cped1	cadherin-like and PC-esterase domain containing 1	106.184	295.603	0.361373	-1.46844	0.000278595	0.0219681
ENSMUSG00000074896	Ifit3	interferon-induced protein with tetratricopeptide repeats 3	194.022	450.991	0.431472	-1.21266	0.00028862	0.0225842
ENSMUSG00000026043	Col3a1	collagen, type III, alpha 1	366.446	2157.42	0.170239	-2.55437	0.000292973	0.0228374
ENSMUSG00000020787	P2rx1	purinergic receptor P2X, ligand-gated ion channel, 1	20.7346	176.499	0.122449	-3.02975	0.000303038	0.0235321
ENSMUSG00000020658	Efr3b	EFR3 homolog B	57.7293	158.96	0.367149	-1.44556	0.000305303	0.0236182
ENSMUSG00000035407	Kank4	KN motif and ankyrin repeat domains 4	112.309	303.472	0.37215	-1.42604	0.000310495	0.0238392
ENSMUSG00000050074	Spink8	serine peptidase inhibitor, Kazal type 8	35.7192	103.8	0.350373	-1.51304	0.000309759	0.0238392
ENSMUSG00000069378	Prdm6	PR domain containing 6	0	13.1835	0.0705043	-3.82614	0.000319317	0.0243587
ENSMUSG00000052131	Akr1b7	aldo-keto reductase family 1, member B7	3.14739	98.5517	0.0416606	-4.58517	0.000319646	0.0243587
ENSMUSG00000021250	Fos	FBJ osteosarcoma oncogene	7726.59	15837.9	0.487887	-1.03538	0.000320879	0.0243618
ENSMUSG00000057098	Ebf1	early B cell factor 1	165.624	537.324	0.309524	-1.69188	0.000330979	0.0250355
ENSMUSG00000001349	Cnn1	calponin 1	3.0965	92.8024	0.0436716	-4.51716	0.000335062	0.0252508
ENSMUSG00000019817	Plagl1	pleiomorphic adenoma gene-like 1	97.4082	224.936	0.435557	-1.19907	0.000341737	0.0254177
ENSMUSG00000086416	Gm14002	predicted gene 14002	34.2455	105.217	0.331824	-1.59151	0.000340423	0.0254177
ENSMUSG00000033152	Podxl2	podocalyxin-like 2	4.88513	34.0537	0.167889	-2.57442	0.000342255	0.0254177
ENSMUSG00000024112	Cacna1h	calcium channel, voltage-dependent, T type, alpha 1H subunit	8.6087	77.566	0.122301	-3.03149	0.000347275	0.0256971
ENSMUSG00000031523	Dlc1	deleted in liver cancer 1	870.801	2629.4	0.331433	-1.59321	0.000352824	0.0260134
ENSMUSG00000026211	Obsl1	obscurin-like 1	18.4708	69.1792	0.277444	-1.84973	0.000357637	0.0262454
ENSMUSG00000021062	Rab15	RAB15, member RAS oncogene family	26.4136	87.9656	0.308137	-1.69836	0.000359825	0.0262454
ENSMUSG00000059895	Ptp4a3	protein tyrosine phosphatase 4a3	123.714	308.718	0.402667	-1.31234	0.000358864	0.0262454
ENSMUSG00000010311	Optc	opticin	0.31119	26.4126	0.0478317	-4.38589	0.000365323	0.0263857
ENSMUSG00000043631	Ecm2	extracellular matrix protein 2, female organ and adipocyte specific	29.0554	139.312	0.214204	-2.22294	0.000363155	0.0263857
ENSMUSG00000048078	Tenm4	teneurin transmembrane protein 4	86.0294	209.8	0.412854	-1.2763	0.000365625	0.0263857
ENSMUSG00000024501	Dpysl3	dihydropyrimidinase-like 3	87.9957	220.321	0.40211	-1.31434	0.000367286	0.0264123
ENSMUSG00000001119	Col6a1	collagen, type VI, alpha 1	108.672	332.113	0.329235	-1.60281	0.000384393	0.0274773
ENSMUSG00000032194	Kank2	KN motif and ankyrin repeat domains 2	363.478	797.767	0.4563	-1.13194	0.000384788	0.0274773
ENSMUSG00000041329	Atp1b2	ATPase, Na+/K+ transporting, beta 2 polypeptide	78.7759	453.937	0.175356	-2.51164	0.000392888	0.027958
ENSMUSG00000028369	Svep1	sushi, von Willebrand factor type A, EGF and pentraxin domain containing 1	77.0935	209.658	0.370713	-1.43163	0.00040446	0.0285823
ENSMUSG00000025272	Tro	trophinin	12.9291	53.26	0.25671	-1.96179	0.000416305	0.0293179
ENSMUSG00000041741	Pde3a	phosphodiesterase 3A, cGMP inhibited	84.9917	576.266	0.148964	-2.74697	0.000419961	0.0294737
ENSMUSG00000015222	Map2	microtubule-associated protein 2	124.149	352.271	0.354258	-1.49713	0.000424813	0.0296108
ENSMUSG00000032186	Tmod2	tropomodulin 2	5.83749	35.4056	0.187814	-2.41262	0.00042454	0.0296108
ENSMUSG00000004951	Hspb1	heat shock protein 1	133.625	346.564	0.387339	-1.36833	0.000426734	0.0296435
ENSMUSG00000021256	Vash1	vasohibin 1	24.8521	81.2287	0.314393	-1.66936	0.00043248	0.0298764
ENSMUSG00000035403	Crb2	crumbs family member 2	14.5613	61.9846	0.247065	-2.01704	0.000433092	0.0298764
ENSMUSG00000030351	Tspan11	tetraspanin 11	16.341	58.8175	0.289898	-1.78639	0.000434475	0.0298764
ENSMUSG00000056481	Cd248	CD248 antigen, endosialin	43.6502	118.495	0.373659	-1.42021	0.000437838	0.0300066
ENSMUSG00000036095	Dgkb	diacylglycerol kinase, beta	32.6277	274.823	0.121918	-3.03602	0.000441522	0.0301578
ENSMUSG00000026796	Fam129b	family with sequence similarity 129, member B	362.477	803.91	0.451575	-1.14696	0.00044768	0.0304766
ENSMUSG00000041012	Cmtm8	CKLF-like MARVEL transmembrane domain containing 8	104.56	251.934	0.417341	-1.2607	0.000458155	0.031086
ENSMUSG00000039103	Nexn	nexilin	69.5428	367.601	0.19138	-2.38549	0.000459756	0.0310914
ENSMUSG00000001508	Sgca	sarcoglycan, alpha (dystrophin-associated glycoprotein)	0.31119	17.5077	0.0708456	-3.81918	0.000469538	0.0314406
ENSMUSG00000040152	Thbs1	thrombospondin 1	1037.89	2461.87	0.421822	-1.24529	0.000468016	0.0314406
ENSMUSG00000001520	Nrip2	nuclear receptor interacting protein 2	43.4442	176.795	0.249974	-2.00015	0.000467205	0.0314406
ENSMUSG00000026678	Rgs5	regulator of G-protein signaling 5	415.986	3155.34	0.132111	-2.92018	0.000476106	0.0317762
ENSMUSG00000042834	Nrep	neuronal regeneration related protein	40.1386	116.225	0.350936	-1.51072	0.000479462	0.0318959
ENSMUSG00000040752	Myh6	myosin, heavy polypeptide 6, cardiac muscle, alpha	14.8965	273.762	0.0578555	-4.1114	0.000486943	0.0322884
ENSMUSG00000030255	Sspn	sarcospan	20.4235	119.287	0.178104	-2.48921	0.0004912	0.0324653
ENSMUSG00000021448	Shc3	src homology 2 domain-containing transforming protein C3	5.3137	51.2476	0.120842	-3.04881	0.000497958	0.0325955
ENSMUSG00000026879	Gsn	gelsolin	892.063	2527.5	0.353199	-1.50145	0.000497795	0.0325955
ENSMUSG00000031340	Gabre	gamma-aminobutyric acid (GABA) A receptor, subunit epsilon	8.59855	54.2761	0.173647	-2.52577	0.000496195	0.0325955
ENSMUSG00000092164	Rergl	RERG/RAS-like	7.4169	135.305	0.0617503	-4.01741	0.000510876	0.0333343
ENSMUSG00000063564	Col23a1	collagen, type XXIII, alpha 1	18.3292	82.0456	0.232754	-2.10312	0.000518841	0.0337461
ENSMUSG00000026065	Slc9a4	solute carrier family 9 (sodium/hydrogen exchanger), member 4	18.8451	65.253	0.299535	-1.7392	0.000535303	0.0345308
ENSMUSG00000024168	Tmem204	transmembrane protein 204	151.082	344.024	0.440787	-1.18185	0.000539358	0.0345308
ENSMUSG00000074818	Pdzd7	PDZ domain containing 7	17.2805	61.2548	0.29364	-1.76788	0.000538246	0.0345308
ENSMUSG00000063430	Wscd2	WSC domain containing 2	64.4228	167.3	0.388726	-1.36317	0.000537224	0.0345308
ENSMUSG00000022793	B4galt4	UDP-Gal:betaGlcNAc beta 1,4-galactosyltransferase, polypeptide 4	61.1626	170.855	0.361715	-1.46707	0.000543974	0.0347174
ENSMUSG00000035547	Capn5	calpain 5	148.047	321.473	0.462201	-1.11341	0.000548597	0.0349034
ENSMUSG00000024065	Ehd3	EH-domain containing 3	904.977	2984.79	0.30343	-1.72057	0.000555509	0.0352334
ENSMUSG00000046275	Tusc5	tumor suppressor candidate 5	4.36135	73.9578	0.0715249	-3.80541	0.000560354	0.0354307
ENSMUSG00000036853	Mcoln3	mucolipin 3	89.9241	260.706	0.347428	-1.52521	0.000562172	0.0354359
ENSMUSG00000034109	Golim4	golgi integral membrane protein 4	684.539	1461.65	0.468697	-1.09327	0.000565947	0.0355641
ENSMUSG00000024049	Myom1	myomesin 1	72.076	953.057	0.076595	-3.70661	0.000593068	0.0368153
ENSMUSG00000029661	Col1a2	collagen, type I, alpha 2	292.625	1392.68	0.210683	-2.24685	0.000592151	0.0368153
ENSMUSG00000087006	Gm13889	predicted gene 13889	5.10111	51.2205	0.116833	-3.09747	0.000596506	0.0369165
ENSMUSG00000020963	Tshr	thyroid stimulating hormone receptor	30.6765	88.6935	0.353164	-1.50159	0.000618702	0.0381745
ENSMUSG00000090210	Itga10	integrin, alpha 10	8.36379	43.7271	0.209354	-2.25599	0.000625466	0.0384756
ENSMUSG00000006356	Crip2	cysteine rich protein 2	388.737	817.129	0.476376	-1.06983	0.000636763	0.038936
ENSMUSG00000005640	Insrr	insulin receptor-related receptor	124.311	310.46	0.402333	-1.31354	0.000636732	0.038936
ENSMUSG00000052921	Arhgef15	Rho guanine nucleotide exchange factor (GEF) 15	286.041	617.024	0.464449	-1.10641	0.000644112	0.0392678
ENSMUSG00000030525	Chrna7	cholinergic receptor, nicotinic, alpha polypeptide 7	7.58725	51.3762	0.163953	-2.60864	0.000650497	0.039539
ENSMUSG00000021186	Fbln5	fibulin 5	251.382	536.553	0.469502	-1.0908	0.000654304	0.0396523
ENSMUSG00000052920	Prkg1	protein kinase, cGMP-dependent, type I	41.5801	198.707	0.213213	-2.22963	0.00068346	0.0412967
ENSMUSG00000001300	Efnb2	ephrin B2	669.658	1602.83	0.418161	-1.25787	0.000691739	0.0415511
ENSMUSG00000039639	Kcne1	potassium voltage-gated channel, Isk-related subfamily, member 1	141.875	457.078	0.311902	-1.68084	0.000700264	0.0418172
ENSMUSG00000003032	Klf4	Kruppel-like factor 4 (gut)	1383.97	2874.3	0.481678	-1.05386	0.000700084	0.0418172
ENSMUSG00000049538	Adamts16	a disintegrin-like and metallopeptidase (reprolysin type) with thrombospondin type 1 motif, 16	18.5253	62.3581	0.308173	-1.69819	0.000703474	0.0418865
ENSMUSG00000002799	Jag2	jagged 2	132.279	334.911	0.39677	-1.33363	0.000710155	0.0421613
ENSMUSG00000091383	Hist1h2al	histone cluster 1, H2al	0.819574	110.396	0.0163342	-5.93596	0.000713421	0.0422325
ENSMUSG00000041120	Nbl1	neuroblastoma, suppression of tumorigenicity 1	52.2998	136.293	0.388219	-1.36506	0.000717638	0.0423593
ENSMUSG00000033565	Rbfox2	RNA binding protein, fox-1 homolog (C. elegans) 2	327.162	659.133	0.497114	-1.00835	0.000741796	0.0435336
ENSMUSG00000032135	Mcam	melanoma cell adhesion molecule	174.457	798.177	0.219547	-2.1874	0.000750055	0.0438922
ENSMUSG00000031824	6430548M08Rik	RIKEN cDNA 6430548M08 gene	307.394	637.508	0.482991	-1.04993	0.000757635	0.0442091
ENSMUSG00000039865	Slc44a3	solute carrier family 44, member 3	60.1315	164.058	0.370365	-1.43298	0.00076276	0.0443813
ENSMUSG00000071342	Lsmem1	leucine-rich single-pass membrane protein 1	7.52226	35.8166	0.231479	-2.11105	0.000768569	0.0445923
ENSMUSG00000050295	Foxc1	forkhead box C1	194.046	462.508	0.420804	-1.24878	0.000781719	0.045099
ENSMUSG00000032537	Ephb1	Eph receptor B1	7.47455	37.9561	0.217541	-2.20064	0.000790896	0.0454999
ENSMUSG00000017667	Zfp334	zinc finger protein 334	54.9472	152.123	0.365374	-1.45256	0.000803276	0.0460823
ENSMUSG00000079173	Zan	zonadhesin	5.49549	29.9703	0.209733	-2.25337	0.000812777	0.0464968
ENSMUSG00000056492	Adgrf5	adhesion G protein-coupled receptor F5	2682.39	6898.97	0.388898	-1.36254	0.000816564	0.0465829
ENSMUSG00000002504	Slc9a3r2	solute carrier family 9 (sodium/hydrogen exchanger), member 3 regulator 2	763.187	1793.77	0.425786	-1.2318	0.000834863	0.0474942
ENSMUSG00000055407	Map6	microtubule-associated protein 6	22.8577	71.275	0.330096	-1.59904	0.000842871	0.0476841
ENSMUSG00000022995	Enah	enabled homolog (Drosophila)	498.075	985.797	0.505753	-0.983496	0.000851492	0.0480387
ENSMUSG00000021760	Gpx8	glutathione peroxidase 8 (putative)	42.3917	117.408	0.36646	-1.44827	0.000857622	0.0482039
ENSMUSG00000029546	Uncx	UNC homeobox	18.573	69.5855	0.277295	-1.85051	0.00085914	0.0482039
ENSMUSG00000062073	Gm10109	predicted gene 10109	2.14077	22.1698	0.135554	-2.88306	0.000882936	0.0494033
ENSMUSG00000023341	Mx2	MX dynamin-like GTPase 2	44.4181	185.449	0.243596	-2.03744	0.000893414	0.0498144
ENSMUSG00000027800	Tm4sf1	transmembrane 4 superfamily member 1	416.257	1014.85	0.410747	-1.28368	0.00089963	0.049927
ENSMUSG00000041828	Abca8a	ATP-binding cassette, sub-family A (ABC1), member 8a	50.4397	173.352	0.295034	-1.76105	0.000915744	0.0504976
ENSMUSG00000028701	Lurap1	leucine rich adaptor protein 1	144.445	305.421	0.474658	-1.07504	0.000913882	0.0504976
ENSMUSG00000036961	Wnt8b	wingless-type MMTV integration site family, member 8B	2.84634	23.3959	0.157664	-2.66508	0.000924008	0.0507285
ENSMUSG00000019326	Aoc3	amine oxidase, copper containing 3	21.2174	278.679	0.0794392	-3.654	0.000950326	0.0518944
ENSMUSG00000041445	Mmrn2	multimerin 2	643.081	1366.47	0.471001	-1.0862	0.000968017	0.0527195
ENSMUSG00000002055	Spag5	sperm associated antigen 5	46.1763	113.725	0.411214	-1.28204	0.000972255	0.0528095
ENSMUSG00000032254	Kif23	kinesin family member 23	54.781	156.099	0.35507	-1.49383	0.000989034	0.0535784
ENSMUSG00000038370	Pcp4l1	Purkinje cell protein 4-like 1	69.5896	344.653	0.204221	-2.2918	0.000998072	0.053722
ENSMUSG00000020155	Kcnmb1	potassium large conductance calcium-activated channel, subfamily M, beta member 1	13.9624	86.3778	0.171237	-2.54593	0.000999578	0.053722
ENSMUSG00000004105	Angptl2	angiopoietin-like 2	149.755	323.846	0.464083	-1.10755	0.000994434	0.053722
ENSMUSG00000021943	Gdf10	growth differentiation factor 10	67.7004	192.252	0.355497	-1.49209	0.00101547	0.0541485
ENSMUSG00000089804	Gm16136	predicted gene 16136	24.2386	75.8704	0.328327	-1.6068	0.00101203	0.0541485
ENSMUSG00000006362	Cbfa2t3	core-binding factor, runt domain, alpha subunit 2, translocated to, 3 (human)	262.678	636.652	0.413514	-1.27399	0.0010153	0.0541485
ENSMUSG00000024867	Pip5k1b	phosphatidylinositol-4-phosphate 5-kinase, type 1 beta	50.1745	143.188	0.354916	-1.49445	0.00103781	0.055196
ENSMUSG00000042745	Id1	inhibitor of DNA binding 1	112.1	322.231	0.349904	-1.51497	0.00105415	0.0557743
ENSMUSG00000007877	Tcap	titin-cap	0	11.4959	0.0800265	-3.64338	0.00106281	0.0560872
ENSMUSG00000009418	Nav1	neuron navigator 1	478.048	971.092	0.492801	-1.02092	0.00107886	0.0566984
ENSMUSG00000085440	Sorbs2os	sorbin and SH3 domain containing 2, opposite strand	18.182	58.8866	0.320305	-1.64248	0.00107994	0.0566984
ENSMUSG00000047841	BC051628	cDNA sequence BC051628	0.622381	14.7019	0.103324	-3.27475	0.00109679	0.0574353
ENSMUSG00000042499	Hoxd11	homeobox D11	0.603598	16.9302	0.0894355	-3.48301	0.00110082	0.0574987
ENSMUSG00000026193	Fn1	fibronectin 1	401.529	996.985	0.403342	-1.30993	0.00110711	0.0576797
ENSMUSG00000054083	Capn12	calpain 12	11.6964	51.6109	0.241325	-2.05095	0.0011213	0.0582705
ENSMUSG00000038576	Susd4	sushi domain containing 4	58.2253	145.664	0.403817	-1.30823	0.00114865	0.0590397
ENSMUSG00000042436	Mfap4	microfibrillar-associated protein 4	35.6309	260.9	0.139866	-2.83788	0.00115269	0.0590397
ENSMUSG00000072720	Myo18b	myosin XVIIIb	0	10.7738	0.0849341	-3.55751	0.00115007	0.0590397
ENSMUSG00000087365	C430049B03Rik	RIKEN cDNA C430049B03 gene	16.9569	64.4906	0.27419	-1.86675	0.00114788	0.0590397
ENSMUSG00000019820	Utrn	utrophin	3720.91	7912.29	0.470337	-1.08823	0.00117946	0.0599204
ENSMUSG00000042607	Asb4	ankyrin repeat and SOCS box-containing 4	13.3887	54.186	0.260731	-1.93937	0.00117897	0.0599204
ENSMUSG00000033590	Myo5c	myosin VC	223.702	437.284	0.512684	-0.963858	0.00117768	0.0599204
ENSMUSG00000021701	Plk2	polo-like kinase 2	722.773	1422.87	0.508314	-0.976209	0.00122173	0.0616086
ENSMUSG00000024027	Glp1r	glucagon-like peptide 1 receptor	11.2798	91.6101	0.132597	-2.91488	0.00125355	0.0627354
ENSMUSG00000027314	Dll4	delta-like 4 (Drosophila)	245.022	614.188	0.399914	-1.32224	0.00125626	0.0627354
ENSMUSG00000029544	Cabp1	calcium binding protein 1	5.84087	32.1017	0.206662	-2.27465	0.00125097	0.0627354
ENSMUSG00000025348	Itga7	integrin alpha 7	67.8687	262.094	0.261765	-1.93366	0.00127109	0.0631615
ENSMUSG00000043003	Rasef	RAS and EF hand domain containing	21.5333	64.0508	0.346396	-1.52951	0.00128204	0.0635513
ENSMUSG00000022061	Nkx3-1	NK-3 transcription factor, locus 1 (Drosophila)	12.5697	132.955	0.1013	-3.30329	0.00132047	0.0650118
ENSMUSG00000029096	Htra3	HtrA serine peptidase 3	14.4306	72.2425	0.210678	-2.24689	0.00132687	0.0650118
ENSMUSG00000023328	Ache	acetylcholinesterase	28.4674	75.2593	0.38641	-1.37179	0.0013147	0.0650118
ENSMUSG00000038244	Mical2	microtubule associated monooxygenase, calponin and LIM domain containing 2	129.819	303.344	0.429839	-1.21813	0.00132742	0.0650118
ENSMUSG00000013076	Amotl1	angiomotin-like 1	655.9	1696.44	0.386995	-1.36961	0.00132376	0.0650118
ENSMUSG00000045281	Gpr20	G protein-coupled receptor 20	0.387622	24.6486	0.0541013	-4.20819	0.00137494	0.0666995
ENSMUSG00000009876	Cox4i2	cytochrome c oxidase subunit IV isoform 2	1.90601	50.6731	0.0562383	-4.1523	0.0013748	0.0666995
ENSMUSG00000036377	C530008M17Rik	RIKEN cDNA C530008M17 gene	7.1887	38.8969	0.205247	-2.28457	0.0013713	0.0666995
ENSMUSG00000040189	Ccdc114	coiled-coil domain containing 114	45.5053	130.883	0.352626	-1.50379	0.00138585	0.0669363
ENSMUSG00000052854	Nrk	Nik related kinase	0	10.5431	0.0866321	-3.52896	0.00138638	0.0669363
ENSMUSG00000071001	Hrct1	histidine rich carboxyl terminus 1	2.17833	20.8306	0.145591	-2.78001	0.00140087	0.0674765
ENSMUSG00000045094	Arhgef37	Rho guanine nucleotide exchange factor (GEF) 37	31.213	81.1901	0.391934	-1.35132	0.00140865	0.0676912
ENSMUSG00000060843	Ctnna3	catenin (cadherin associated protein), alpha 3	12.4228	179.02	0.074563	-3.7454	0.00144117	0.0689732
ENSMUSG00000048285	Frmd6	FERM domain containing 6	53.2544	136.741	0.393887	-1.34415	0.00145081	0.0689732
ENSMUSG00000000794	Kcnn3	potassium intermediate/small conductance calcium-activated channel, subfamily N, member 3	8.62956	50.1024	0.188437	-2.40785	0.00144755	0.0689732
ENSMUSG00000030098	Grip2	glutamate receptor interacting protein 2	68.4649	369.188	0.187648	-2.4139	0.00145026	0.0689732
ENSMUSG00000006675	P4htm	prolyl 4-hydroxylase, transmembrane (endoplasmic reticulum)	12.7251	48.5307	0.277104	-1.8515	0.00145221	0.0689732
ENSMUSG00000056427	Slit3	slit homolog 3 (Drosophila)	101.925	557.213	0.184382	-2.43923	0.00146609	0.0694707
ENSMUSG00000074793	Hspa12b	heat shock protein 12B	95.6067	224.455	0.428496	-1.22265	0.00148266	0.0700935
ENSMUSG00000030306	Tmtc1	transmembrane and tetratricopeptide repeat containing 1	335.789	725.703	0.463447	-1.10952	0.00148994	0.0701129
ENSMUSG00000000317	Bcl6b	B cell CLL/lymphoma 6, member B	85.0114	192.577	0.444327	-1.17031	0.0014951	0.0701943
ENSMUSG00000046719	Nxph3	neurexophilin 3	0.819574	13.97	0.121548	-3.0404	0.00153134	0.0715663
ENSMUSG00000027977	Ndst3	N-deacetylase/N-sulfotransferase (heparan glucosaminyl) 3	2.37006	102.385	0.0325974	-4.9391	0.00153979	0.0716396
ENSMUSG00000039410	Prdm16	PR domain containing 16	510.889	1004.34	0.50917	-0.973781	0.00153992	0.0716396
ENSMUSG00000019789	Hey2	hairy/enhancer-of-split related with YRPW motif 2	20.3635	160.759	0.13207	-2.92063	0.00156181	0.0723286
ENSMUSG00000039883	Lrrc17	leucine rich repeat containing 17	2.45196	21.71	0.152001	-2.71784	0.00156033	0.0723286
ENSMUSG00000030516	Tjp1	tight junction protein 1	1466.93	2758.46	0.531963	-0.910603	0.00157383	0.0724305
ENSMUSG00000031871	Cdh5	cadherin 5	1041.93	2331.02	0.447221	-1.16094	0.00157025	0.0724305
ENSMUSG00000084843	B230312C02Rik	RIKEN cDNA B230312C02 gene	0	10.5034	0.0869305	-3.52399	0.00158379	0.0726699
ENSMUSG00000031870	Pgr	progesterone receptor	22.5298	67.9025	0.341494	-1.55007	0.00158697	0.0726699
ENSMUSG00000018554	Ybx2	Y box protein 2	84.7071	220.463	0.387004	-1.36958	0.00159117	0.0726992
ENSMUSG00000000216	Scnn1g	sodium channel, nonvoltage-gated 1 gamma	347.646	988.859	0.352218	-1.50546	0.00161307	0.0735353
ENSMUSG00000032766	Gng11	guanine nucleotide binding protein (G protein), gamma 11	54.7543	135.34	0.408935	-1.29006	0.0016297	0.0737992
ENSMUSG00000040265	Dnm3	dynamin 3	336.422	689.874	0.488399	-1.03387	0.00171357	0.0774255
ENSMUSG00000075318	Scn2a	sodium channel, voltage-gated, type II, alpha	7.59739	33.2892	0.250731	-1.99579	0.00172387	0.0775799
ENSMUSG00000053647	Gper1	G protein-coupled estrogen receptor 1	18.2736	60.3209	0.314307	-1.66975	0.00172459	0.0775799
ENSMUSG00000017167	Cntnap1	contactin associated protein-like 1	32.9425	86.3781	0.388456	-1.36418	0.00172892	0.0776038
ENSMUSG00000024940	Ltbp3	latent transforming growth factor beta binding protein 3	325.918	621.967	0.524776	-0.930226	0.00173972	0.0779172
ENSMUSG00000016382	Pls3	plastin 3 (T-isoform)	749.957	1551.69	0.483649	-1.04797	0.00175403	0.0783862
ENSMUSG00000007682	Dio2	deiodinase, iodothyronine, type II	7.16206	42.3781	0.188161	-2.40996	0.00176198	0.0783987
ENSMUSG00000091017	Fam71a	family with sequence similarity 71, member A	132.334	728.772	0.182707	-2.4524	0.00176894	0.078537
ENSMUSG00000030849	Fgfr2	fibroblast growth factor receptor 2	239.565	610.232	0.393574	-1.34529	0.00177411	0.0785956
ENSMUSG00000001435	Col18a1	collagen, type XVIII, alpha 1	1982.36	4070.74	0.487104	-1.0377	0.00179494	0.079175
ENSMUSG00000055235	Wdr86	WD repeat domain 86	11.0961	43.0172	0.274805	-1.86352	0.00179892	0.0791797
ENSMUSG00000020717	Pecam1	platelet/endothelial cell adhesion molecule 1	1002.89	2253.04	0.445372	-1.16692	0.00180547	0.0792972
ENSMUSG00000022595	Lypd2	Ly6/Plaur domain containing 2	4.26613	30.1813	0.168888	-2.56586	0.0018328	0.0802778
ENSMUSG00000085925	Rtl1	retrotransposon-like 1	9.36724	37.1191	0.271969	-1.87848	0.00186251	0.0812777
ENSMUSG00000038156	Spon1	spondin 1, (f-spondin) extracellular matrix protein	156.249	340.547	0.460403	-1.11903	0.00187953	0.0818458
ENSMUSG00000028108	Ecm1	extracellular matrix protein 1	90.0669	200.753	0.451378	-1.14759	0.001891	0.0821701
ENSMUSG00000038210	Hoxa11	homeobox A11	0.409787	12.9953	0.100733	-3.3114	0.00189937	0.0823585
ENSMUSG00000012017	Scarf2	scavenger receptor class F, member 2	49.1254	111.793	0.4444	-1.17007	0.00192114	0.0824703
ENSMUSG00000042804	Gpr153	G protein-coupled receptor 153	15.939	56.0312	0.297013	-1.7514	0.00192214	0.0824703
ENSMUSG00000043088	Il17re	interleukin 17 receptor E	52.1411	122.402	0.430632	-1.21547	0.00192181	0.0824703
ENSMUSG00000053198	Prx	periaxin	28.0219	92.3721	0.31082	-1.68585	0.00192132	0.0824703
ENSMUSG00000019913	Sim1	single-minded homolog 1 (Drosophila)	394.945	807.083	0.489981	-1.0292	0.00192903	0.0825923
ENSMUSG00000026604	Ptpn14	protein tyrosine phosphatase, non-receptor type 14	482.328	1092.41	0.442036	-1.17776	0.00194016	0.0828951
ENSMUSG00000041378	Cldn5	claudin 5	82.6709	230.142	0.361989	-1.46598	0.00196031	0.0835811
ENSMUSG00000086311	Gm12122	predicted gene 12122	0	10.1498	0.0896874	-3.47895	0.00198009	0.0842489
ENSMUSG00000029163	Emilin1	elastin microfibril interfacer 1	138.517	335.861	0.414168	-1.27171	0.00201935	0.0857406
ENSMUSG00000028373	Astn2	astrotactin 2	8.38278	33.5635	0.271465	-1.88116	0.00205071	0.0868915
ENSMUSG00000041075	Fzd7	frizzled class receptor 7	290.504	590.746	0.492617	-1.02146	0.00206074	0.0871356
ENSMUSG00000039376	Synpo2l	synaptopodin 2-like	16.5789	53.3898	0.323202	-1.62949	0.00207217	0.0871477
ENSMUSG00000042216	Sgsm1	small G protein signaling modulator 1	75.4661	156.415	0.485762	-1.04168	0.00206962	0.0871477
ENSMUSG00000030790	Adm	adrenomedullin	83.5483	185.539	0.453248	-1.14163	0.00207383	0.0871477
ENSMUSG00000029335	Bmp3	bone morphogenetic protein 3	34.2472	86.0639	0.404843	-1.30456	0.00208004	0.0872292
ENSMUSG00000048776	Pthlh	parathyroid hormone-like peptide	1.6136	19.345	0.128464	-2.96056	0.00209928	0.0873189
ENSMUSG00000054793	Cadm4	cell adhesion molecule 4	144.011	315.85	0.457665	-1.12764	0.00209733	0.0873189
ENSMUSG00000053646	Plxnb1	plexin B1	536.06	990.468	0.541681	-0.884484	0.0020978	0.0873189
ENSMUSG00000092035	Peg10	paternally expressed 10	29.5737	79.3975	0.380282	-1.39486	0.00210863	0.0873519
ENSMUSG00000027737	Slc7a11	solute carrier family 7 (cationic amino acid transporter, y+ system), member 11	9.83337	38.3859	0.275057	-1.8622	0.00213646	0.0883256
ENSMUSG00000025656	Arhgef9	CDC42 guanine nucleotide exchange factor (GEF) 9	53.5319	127.554	0.424196	-1.2372	0.00220826	0.0907431
ENSMUSG00000020758	Itgb4	integrin beta 4	112.442	229.614	0.491912	-1.02353	0.00222106	0.0910859
ENSMUSG00000029361	Nos1	nitric oxide synthase 1, neuronal	63.6091	148.722	0.431528	-1.21248	0.002233	0.0913921
ENSMUSG00000040666	Sh3bgr	SH3-binding domain glutamic acid-rich protein	4.18294	25.1795	0.197977	-2.3366	0.00224354	0.0916397
ENSMUSG00000033207	Mamdc2	MAM domain containing 2	3.42309	50.4876	0.085906	-3.5411	0.00224923	0.0916888
ENSMUSG00000047793	Sned1	sushi, nidogen and EGF-like domains 1	244.037	512.486	0.477203	-1.06732	0.00227554	0.0925763
ENSMUSG00000055980	Irs1	insulin receptor substrate 1	320.9	737.865	0.435668	-1.1987	0.00232744	0.0944997
ENSMUSG00000034738	Nostrin	nitric oxide synthase trafficker	66.5233	216.453	0.310519	-1.68725	0.00233314	0.0944998
ENSMUSG00000003545	Fosb	FBJ osteosarcoma oncogene B	5209.57	10457	0.498238	-1.00509	0.0023367	0.0944998
ENSMUSG00000000058	Cav2	caveolin 2	195.709	486.774	0.40328	-1.31015	0.00234594	0.0946858
ENSMUSG00000051586	Mical3	microtubule associated monooxygenase, calponin and LIM domain containing 3	610.232	1181.51	0.516892	-0.952067	0.00242211	0.0975674
ENSMUSG00000061080	Lsamp	limbic system-associated membrane protein	13.8278	50.8099	0.286196	-1.80493	0.00243361	0.0978376
ENSMUSG00000045083	Lingo2	leucine rich repeat and Ig domain containing 2	0.819574	13.338	0.126906	-2.97817	0.00244866	0.0978651
ENSMUSG00000032549	Rab6b	RAB6B, member RAS oncogene family	162.872	324.744	0.503072	-0.991164	0.00244547	0.0978651
ENSMUSG00000042363	Lgalsl	lectin, galactoside binding-like	103.084	226.611	0.457289	-1.12882	0.00248466	0.0991052
ENSMUSG00000031520	Vegfc	vascular endothelial growth factor C	43.8345	108.518	0.409381	-1.28848	0.0024894	0.0991052
ENSMUSG00000040435	Ppp1r15a	protein phosphatase 1, regulatory (inhibitor) subunit 15A	3229.76	6025.48	0.536095	-0.89944	0.00250368	0.0994799
ENSMUSG00000027524	Edn3	endothelin 3	37.9617	95.2374	0.40485	-1.30454	0.00254383	0.100684
ENSMUSG00000090260	2810442N19Rik	RIKEN cDNA 2810442N19 gene	3.53839	26.282	0.166351	-2.58769	0.00256879	0.101475
ENSMUSG00000063434	Sorcs3	sortilin-related VPS10 domain containing receptor 3	14.2659	45.8458	0.325876	-1.61761	0.00259544	0.10233
ENSMUSG00000027460	Angpt4	angiopoietin 4	4.21504	33.1624	0.152654	-2.71166	0.00262246	0.103196
ENSMUSG00000068747	Sort1	sortilin 1	759.122	1575.47	0.482168	-1.05239	0.00262917	0.103261
ENSMUSG00000072214	Sept5	septin 5	13.0008	46.0399	0.297638	-1.74837	0.00263554	0.103312
ENSMUSG00000054728	Phactr1	phosphatase and actin regulator 1	315.38	589.322	0.535944	-0.899844	0.00267445	0.104437
ENSMUSG00000033209	Ttc28	tetratricopeptide repeat domain 28	483.02	914.584	0.528646	-0.919627	0.00268397	0.104608
ENSMUSG00000034117	Ptgdr2	prostaglandin D2 receptor 2	0.581433	14.5612	0.101627	-3.29865	0.00269186	0.104716
ENSMUSG00000006574	Slc4a1	solute carrier family 4 (anion exchanger), member 1	250.743	612.491	0.410344	-1.28509	0.00271009	0.105167
ENSMUSG00000037679	Inf2	inverted formin, FH2 and WH2 domain containing	187.593	437.27	0.430314	-1.21654	0.00271889	0.105167
ENSMUSG00000002489	Tiam1	T cell lymphoma invasion and metastasis 1	241.191	477.461	0.506188	-0.982254	0.00271627	0.105167
ENSMUSG00000091191	Gm17334	predicted gene, 17334	41.634	104.28	0.404959	-1.30415	0.00274613	0.10562
ENSMUSG00000018845	Unc45b	unc-45 myosin chaperone B	23.7926	93.0339	0.263656	-1.92327	0.00274206	0.10562
ENSMUSG00000056679	Gpr173	G-protein coupled receptor 173	0	9.87656	0.0919409	-3.44315	0.00274579	0.10562
ENSMUSG00000036564	Ndrg4	N-myc downstream regulated gene 4	16.4573	75.077	0.229469	-2.12363	0.00276043	0.10597
ENSMUSG00000047146	Tet1	tet methylcytosine dioxygenase 1	63.5476	167.935	0.382087	-1.38803	0.00278105	0.106482
ENSMUSG00000037419	Endod1	endonuclease domain containing 1	256.593	506.961	0.507112	-0.979624	0.00278418	0.106482
ENSMUSG00000006154	Eps8l1	EPS8-like 1	81.0012	326.871	0.250102	-1.99941	0.00279498	0.106695
ENSMUSG00000072235	Tuba1a	tubulin, alpha 1A	71.6002	155.734	0.463206	-1.11028	0.00280386	0.106834
ENSMUSG00000029108	Pcdh7	protocadherin 7	126.208	347.517	0.364998	-1.45404	0.00286619	0.109006
ENSMUSG00000026394	Atp6v1g3	ATPase, H+ transporting, lysosomal V1 subunit G3	432.669	901.134	0.480715	-1.05675	0.00288122	0.109171
ENSMUSG00000067889	Sptbn2	spectrin beta, non-erythrocytic 2	1213.88	2580.71	0.470574	-1.08751	0.00287631	0.109171
ENSMUSG00000031661	Nkd1	naked cuticle 1 homolog (Drosophila)	21.2261	57.5784	0.379425	-1.39812	0.00290012	0.109684
ENSMUSG00000024140	Epas1	endothelial PAS domain protein 1	3972.26	9122.95	0.435476	-1.19933	0.00293986	0.110369
ENSMUSG00000074852	Hpse2	heparanase 2	0	18.506	0.0512664	-4.28584	0.00292835	0.110369
ENSMUSG00000031891	Hsd11b2	hydroxysteroid 11-beta dehydrogenase 2	948.311	2253.36	0.4211	-1.24777	0.00293674	0.110369
ENSMUSG00000002325	Irf9	interferon regulatory factor 9	404.11	762.5	0.530596	-0.914314	0.00295192	0.110416
ENSMUSG00000052516	Robo2	roundabout guidance receptor 2	45.5661	142.035	0.325557	-1.61902	0.00295157	0.110416
ENSMUSG00000061171	Slc38a11	solute carrier family 38, member 11	4.63367	51.9308	0.106435	-3.23196	0.0029597	0.110505
ENSMUSG00000018417	Myo1b	myosin IB	129.456	282.355	0.460397	-1.11905	0.00299369	0.110683
ENSMUSG00000026471	Mr1	major histocompatibility complex, class I-related	52.1512	119.425	0.441362	-1.17996	0.00296995	0.110683
ENSMUSG00000055254	Ntrk2	neurotrophic tyrosine kinase, receptor, type 2	4.08226	26.5146	0.184711	-2.43666	0.00298032	0.110683
ENSMUSG00000001657	Hoxc8	homeobox C8	29.6951	91.0757	0.333368	-1.58481	0.00299699	0.110683
ENSMUSG00000056947	Mab21l1	mab-21-like 1 (C. elegans)	5.3969	26.7534	0.230491	-2.11722	0.00299471	0.110683
ENSMUSG00000031486	Adgra2	adhesion G protein-coupled receptor A2	159.038	376.819	0.423584	-1.23928	0.00298618	0.110683
ENSMUSG00000026185	Igfbp5	insulin-like growth factor binding protein 5	5451.49	9788.55	0.55697	-0.844327	0.00300839	0.110903
ENSMUSG00000037206	Islr	immunoglobulin superfamily containing leucine-rich repeat	28.9265	76.1783	0.387759	-1.36677	0.00303854	0.111813
ENSMUSG00000027750	Postn	periostin, osteoblast specific factor	3.1119	22.1003	0.178002	-2.49003	0.00305069	0.112058
ENSMUSG00000019467	Arhgef25	Rho guanine nucleotide exchange factor (GEF) 25	44.7544	118.625	0.382482	-1.38654	0.00306333	0.11232
ENSMUSG00000004031	Brinp2	bone morphogenic protein/retinoic acid inducible neural-specific 2	0.193811	12.4902	0.0884948	-3.49826	0.00308563	0.112572
ENSMUSG00000049521	Cdc42ep1	CDC42 effector protein (Rho GTPase binding) 1	256.603	493.763	0.520658	-0.941591	0.00308672	0.112572
ENSMUSG00000062488	Ifit3b	interferon-induced protein with tetratricopeptide repeats 3B	66.7028	151.998	0.442509	-1.17622	0.00308297	0.112572
ENSMUSG00000056508	1700001K19Rik	RIKEN cDNA 1700001K19 gene	12.7896	44.3719	0.303923	-1.71822	0.0031149	0.113238
ENSMUSG00000045333	Zfp423	zinc finger protein 423	44.1307	121.55	0.368263	-1.44119	0.0031161	0.113238
ENSMUSG00000041696	Rasl12	RAS-like, family 12	31.2034	113.238	0.281897	-1.82676	0.00316991	0.114402
ENSMUSG00000034910	Pygo1	pygopus 1	7.71607	45.1829	0.188729	-2.40561	0.00316106	0.114402
ENSMUSG00000046387	Pcdhb17	protocadherin beta 17	12.2801	38.3958	0.337094	-1.56878	0.00317954	0.114525
ENSMUSG00000001506	Col1a1	collagen, type I, alpha 1	368.921	1886.76	0.195957	-2.35139	0.00321314	0.115532
ENSMUSG00000090628	Gm17083	predicted gene 17083	45.1912	112.452	0.407144	-1.29639	0.00326565	0.116792
ENSMUSG00000086607	4930511M06Rik	RIKEN cDNA 4930511M06 gene	12.2678	42.1287	0.307634	-1.70071	0.00325595	0.116792
ENSMUSG00000027894	Slc6a17	solute carrier family 6 (neurotransmitter transporter), member 17	252.083	479.039	0.527214	-0.923539	0.00327679	0.116792
ENSMUSG00000063531	Sema3e	sema domain, immunoglobulin domain (Ig), short basic domain, secreted, (semaphorin) 3E	4.28492	26.7374	0.190534	-2.39188	0.00327032	0.116792
ENSMUSG00000060034	Ctf2	cardiotrophin 2	0.31119	10.9828	0.109423	-3.19202	0.00327604	0.116792
ENSMUSG00000020154	Ptprb	protein tyrosine phosphatase, receptor type, B	2858.15	6647.99	0.430013	-1.21755	0.00331109	0.117809
ENSMUSG00000045903	Npas4	neuronal PAS domain protein 4	0.622381	26.1095	0.0598455	-4.06261	0.00333347	0.118399
ENSMUSG00000078921	Tgtp2	T cell specific GTPase 2	171.312	421.211	0.408118	-1.29294	0.00336192	0.1191
ENSMUSG00000031024	St5	suppression of tumorigenicity 5	480.229	889.206	0.540581	-0.887417	0.00336488	0.1191
ENSMUSG00000024186	Rgs11	regulator of G-protein signaling 11	68.2257	149.634	0.459561	-1.12167	0.00339096	0.119403
ENSMUSG00000027210	Meis2	Meis homeobox 2	611.616	1428.05	0.428686	-1.22201	0.00340677	0.119753
ENSMUSG00000058070	Eml1	echinoderm microtubule associated protein like 1	127.892	354.498	0.362567	-1.46368	0.0034556	0.120846
ENSMUSG00000029185	Fam114a1	family with sequence similarity 114, member A1	84.3433	191.973	0.442254	-1.17705	0.00347302	0.121247
ENSMUSG00000075027	4631405J19Rik	RIKEN cDNA 4631405J19 gene	24.1834	80.4056	0.309356	-1.69266	0.00350631	0.1222
ENSMUSG00000020099	Unc5b	unc-5 netrin receptor B	172.331	354.691	0.487309	-1.03709	0.00355813	0.123512
ENSMUSG00000001240	Ramp2	receptor (calcitonin) activity modifying protein 2	165.285	324.216	0.511305	-0.967743	0.00356208	0.123512
ENSMUSG00000030873	Scnn1b	sodium channel, nonvoltage-gated 1 beta	320.674	780.6	0.411559	-1.28083	0.00355178	0.123512
ENSMUSG00000024678	Ms4a4d	membrane-spanning 4-domains, subfamily A, member 4D	8.20437	32.5939	0.273989	-1.86781	0.00359812	0.124339
ENSMUSG00000019899	Lama2	laminin, alpha 2	110.189	347.002	0.319507	-1.64608	0.00365622	0.126005
ENSMUSG00000035258	Abi3bp	ABI gene family, member 3 (NESH) binding protein	54.9851	128.063	0.433782	-1.20496	0.003671	0.126005
ENSMUSG00000040562	Gstm2	glutathione S-transferase, mu 2	142.16	302.34	0.471947	-1.0833	0.00366977	0.126005
ENSMUSG00000049047	Armcx3	armadillo repeat containing, X-linked 3	74.0847	163.729	0.455807	-1.1335	0.0036674	0.126005
ENSMUSG00000078816	Prkcg	protein kinase C, gamma	7.27189	34.2479	0.234678	-2.09125	0.00368199	0.12617
ENSMUSG00000023963	Cyp39a1	cytochrome P450, family 39, subfamily a, polypeptide 1	35.936	91.8063	0.39799	-1.3292	0.00370899	0.126303
ENSMUSG00000038239	Hrc	histidine rich calcium binding protein	7.94069	80.2617	0.110023	-3.18412	0.00371062	0.126303
ENSMUSG00000067780	Pi15	peptidase inhibitor 15	13.858	101.871	0.144434	-2.79152	0.00373726	0.126694
ENSMUSG00000068323	Slc4a5	solute carrier family 4, sodium bicarbonate cotransporter, member 5	9.56105	35.478	0.289519	-1.78827	0.0037407	0.126694
ENSMUSG00000030401	Rtn2	reticulon 2 (Z-band associated protein)	12.8292	122.429	0.112042	-3.15789	0.00373986	0.126694
ENSMUSG00000022687	Boc	biregional cell adhesion molecule-related/down-regulated by oncogenes (Cdon) binding protein	127.302	284.914	0.448745	-1.15603	0.0037525	0.126883
ENSMUSG00000035934	Pknox2	Pbx/knotted 1 homeobox 2	13.383	47.8722	0.294299	-1.76465	0.00377756	0.127519
ENSMUSG00000025810	Nrp1	neuropilin 1	2416.2	4501.99	0.536799	-0.897546	0.0038568	0.129979
ENSMUSG00000008136	Fhl2	four and a half LIM domains 2	52.283	119.505	0.442163	-1.17735	0.00388819	0.130821
ENSMUSG00000040836	Gpr161	G protein-coupled receptor 161	10.107	36.1673	0.298838	-1.74257	0.00397645	0.133571
ENSMUSG00000071856	Mcc	mutated in colorectal cancers	284.039	616.348	0.461714	-1.11493	0.00408347	0.136492
ENSMUSG00000031565	Fgfr1	fibroblast growth factor receptor 1	454.038	834.836	0.54441	-0.877233	0.00408217	0.136492
ENSMUSG00000042246	Tmc7	transmembrane channel-like gene family 7	14.4903	48.716	0.311576	-1.68235	0.00409364	0.136609
ENSMUSG00000049791	Fzd4	frizzled class receptor 4	901.846	1582.94	0.57	-0.810967	0.00411845	0.137212
ENSMUSG00000024485	Slc4a9	solute carrier family 4, sodium bicarbonate cotransporter, member 9	419.655	1085.3	0.387237	-1.36871	0.00419257	0.139001
ENSMUSG00000029070	Mxra8	matrix-remodelling associated 8	68.9524	147.599	0.470747	-1.08698	0.004179	0.139001
ENSMUSG00000066273	Olfr33	olfactory receptor 33	0	8.82961	0.101733	-3.29713	0.00418747	0.139001
ENSMUSG00000040732	Erg	avian erythroblastosis virus E-26 (v-ets) oncogene related	166.014	436.341	0.381884	-1.38879	0.00420396	0.139153
ENSMUSG00000024411	Aqp4	aquaporin 4	230.948	429.214	0.539147	-0.89125	0.0042701	0.140658
ENSMUSG00000036617	Etl4	enhancer trap locus 4	737.926	1301.47	0.567327	-0.817747	0.00425693	0.140658
ENSMUSG00000042662	Dusp15	dual specificity phosphatase-like 15	54.4435	119.619	0.459659	-1.12136	0.00426479	0.140658
ENSMUSG00000086040	Wipf3	WAS/WASL interacting protein family, member 3	48.8507	107.842	0.458008	-1.12655	0.00432958	0.142159
ENSMUSG00000019893	Ros1	Ros1 proto-oncogene	1.20381	16.0617	0.129168	-2.95268	0.0043552	0.142771
ENSMUSG00000084897	Gm14226	predicted gene 14226	5.61625	39.0001	0.165406	-2.59592	0.00436598	0.142895
ENSMUSG00000032827	Ppp1r9a	protein phosphatase 1, regulatory (inhibitor) subunit 9A	442.193	800.361	0.553051	-0.854516	0.0043754	0.142974
ENSMUSG00000071984	Fndc1	fibronectin type III domain containing 1	19.318	54.3597	0.367018	-1.44608	0.00439912	0.14314
ENSMUSG00000046818	Ddit4l	DNA-damage-inducible transcript 4-like	72.5737	154.104	0.47435	-1.07597	0.00443643	0.143818
ENSMUSG00000091243	Vgll3	vestigial like family member 3	13.1182	49.6736	0.278611	-1.84368	0.00445525	0.144199
ENSMUSG00000021253	Tgfb3	transforming growth factor, beta 3	69.1598	183.804	0.379645	-1.39728	0.00449918	0.145161
ENSMUSG00000040136	Abcc8	ATP-binding cassette, sub-family C (CFTR/MRP), member 8	0.914788	20.1264	0.0906347	-3.46379	0.00449378	0.145161
ENSMUSG00000001995	Sipa1l2	signal-induced proliferation-associated 1 like 2	483.033	967.491	0.49978	-1.00063	0.00455471	0.14672
ENSMUSG00000078190	Dnm3os	dynamin 3, opposite strand	45.5028	101.63	0.453109	-1.14207	0.00456519	0.146827
ENSMUSG00000026109	Tmeff2	transmembrane protein with EGF-like and two follistatin-like domains 2	8.27742	32.1354	0.279986	-1.83658	0.00458273	0.147159
ENSMUSG00000042429	Adora1	adenosine A1 receptor	64.1545	142.36	0.454482	-1.13771	0.0046007	0.147504
ENSMUSG00000035692	Isg15	ISG15 ubiquitin-like modifier	26.3452	65.7553	0.409633	-1.2876	0.0046139	0.147696
ENSMUSG00000022994	Adcy6	adenylate cyclase 6	1424.09	2432.61	0.585589	-0.77204	0.00466935	0.149237
ENSMUSG00000022836	Mylk	myosin, light polypeptide kinase	1599.97	4103.34	0.390067	-1.35821	0.00471474	0.150217
ENSMUSG00000049807	Arhgap23	Rho GTPase activating protein 23	162.879	385.21	0.424325	-1.23676	0.00477199	0.151333
ENSMUSG00000004988	Fxyd4	FXYD domain-containing ion transport regulator 4	46.0629	110.706	0.421309	-1.24705	0.00479048	0.151684
ENSMUSG00000079588	Tmem182	transmembrane protein 182	2.3312	26.7443	0.120068	-3.05808	0.00480599	0.151704
ENSMUSG00000030554	Synm	synemin, intermediate filament protein	61.4801	258.342	0.240918	-2.05339	0.00479973	0.151704
ENSMUSG00000031209	Heph	hephaestin	119.375	231.408	0.51795	-0.949116	0.00484663	0.152516
ENSMUSG00000024420	Zfp521	zinc finger protein 521	68.8916	146.448	0.474009	-1.07702	0.00487261	0.152862
ENSMUSG00000047766	Lrrc49	leucine rich repeat containing 49	49.6102	114.63	0.437691	-1.19201	0.00487208	0.152862
ENSMUSG00000025959	Klf7	Kruppel-like factor 7 (ubiquitous)	267.604	531.005	0.50489	-0.98596	0.00492309	0.153912
ENSMUSG00000086943	4732414G09Rik	RIKEN cDNA 4732414G09 gene	0	9.49031	0.0953261	-3.39098	0.00492869	0.153912
ENSMUSG00000020614	Fam20a	family with sequence similarity 20, member A	64.1709	147.713	0.438232	-1.19023	0.00492664	0.153912
ENSMUSG00000057722	Lepr	leptin receptor	54.0515	120.447	0.453298	-1.14147	0.00494168	0.154082
ENSMUSG00000015647	Lama5	laminin, alpha 5	1648.37	3165.56	0.520873	-0.940998	0.00504428	0.156803
ENSMUSG00000005397	Nid1	nidogen 1	347.961	667.595	0.521932	-0.938067	0.00506027	0.156958
ENSMUSG00000005360	Slc1a3	solute carrier family 1 (glial high affinity glutamate transporter), member 3	31.4972	78.7498	0.407489	-1.29517	0.00506466	0.156958
ENSMUSG00000021684	Pde8b	phosphodiesterase 8B	85.1858	188.73	0.454254	-1.13843	0.00508005	0.157197
ENSMUSG00000023064	Sncg	synuclein, gamma	95.7219	294.855	0.326924	-1.61297	0.0050983	0.157523
ENSMUSG00000037887	Dusp8	dual specificity phosphatase 8	82.1347	166.539	0.496211	-1.01097	0.0051309	0.15829
ENSMUSG00000037813	D630003M21Rik	RIKEN cDNA D630003M21 gene	15.2066	48.0445	0.330447	-1.59751	0.00515935	0.158928
ENSMUSG00000078302	Foxd1	forkhead box D1	2.00122	18.3159	0.155376	-2.68617	0.00521657	0.160449
ENSMUSG00000026657	Frmd4a	FERM domain containing 4A	603.919	1118.97	0.540122	-0.888643	0.00525471	0.161179
ENSMUSG00000027684	Mecom	MDS1 and EVI1 complex locus	1049.1	2045.31	0.51317	-0.96249	0.00526092	0.161179
ENSMUSG00000033763	Mtss1l	metastasis suppressor 1-like	140.193	400.263	0.35187	-1.50688	0.00526498	0.161179
ENSMUSG00000050919	Zfp366	zinc finger protein 366	165.282	348.86	0.47528	-1.07315	0.00530117	0.161513
ENSMUSG00000029484	Anxa3	annexin A3	108.646	214.22	0.509462	-0.972954	0.00530654	0.161513
ENSMUSG00000062960	Kdr	kinase insert domain protein receptor	1738.18	3465.12	0.501766	-0.994912	0.00533219	0.162053
ENSMUSG00000028328	Tmod1	tropomodulin 1	14.0951	49.8313	0.296966	-1.75163	0.00538439	0.16312
ENSMUSG00000038143	Stox2	storkhead box 2	157.528	316.815	0.498807	-1.00345	0.00539129	0.16312
ENSMUSG00000014786	Slc9a5	solute carrier family 9 (sodium/hydrogen exchanger), member 5	10.3939	36.7793	0.301592	-1.72933	0.00538645	0.16312
ENSMUSG00000017969	Ptgis	prostaglandin I2 (prostacyclin) synthase	12.0983	84.6558	0.152918	-2.70917	0.00542349	0.163608
ENSMUSG00000086964	Gm15948	predicted gene 15948	7.55306	29.4502	0.280887	-1.83194	0.00543183	0.163608
ENSMUSG00000045868	Gvin1	GTPase, very large interferon inducible 1	23.8543	74.0717	0.331074	-1.59478	0.00543772	0.163608
ENSMUSG00000025902	Sox17	SRY (sex determining region Y)-box 17	204.84	441.06	0.465638	-1.10272	0.0054587	0.163946
ENSMUSG00000059408	Mrgprh	MAS-related GPR, member H	3.27491	25.4964	0.16134	-2.63183	0.00547489	0.164191
ENSMUSG00000023885	Thbs2	thrombospondin 2	189.868	348.153	0.546661	-0.871283	0.0055182	0.165005
ENSMUSG00000013236	Ptprs	protein tyrosine phosphatase, receptor type, S	408.489	737.278	0.554654	-0.850339	0.00551711	0.165005
ENSMUSG00000068246	Apol9b	apolipoprotein L 9b	8.8844	31.349	0.305555	-1.7105	0.00554996	0.165712
ENSMUSG00000018001	Cyth3	cytohesin 3	381.366	678.791	0.562476	-0.830137	0.00560913	0.167234
ENSMUSG00000039542	Ncam1	neural cell adhesion molecule 1	49.9948	114.395	0.441916	-1.17815	0.00562736	0.167533
ENSMUSG00000032548	Slco2a1	solute carrier organic anion transporter family, member 2a1	340.4	854.149	0.399229	-1.32471	0.00570365	0.169311
ENSMUSG00000052062	Pard3b	par-3 family cell polarity regulator beta	393.062	675.987	0.582083	-0.780704	0.00575959	0.170318
ENSMUSG00000022528	Hes1	hairy and enhancer of split 1 (Drosophila)	467.709	898.077	0.521322	-0.939752	0.00577096	0.170318
ENSMUSG00000036745	Ttll7	tubulin tyrosine ligase-like family, member 7	77.4417	225.205	0.346773	-1.52794	0.00576864	0.170318
ENSMUSG00000042254	Cilp	cartilage intermediate layer protein, nucleotide pyrophosphohydrolase	3.85635	61.2942	0.0779582	-3.68115	0.00576832	0.170318
ENSMUSG00000041134	Cyyr1	cysteine and tyrosine-rich protein 1	389.666	878.201	0.444342	-1.17026	0.00579925	0.170906
ENSMUSG00000032452	Clstn2	calsyntenin 2	12.7287	63.1483	0.214016	-2.22421	0.005821	0.171093
ENSMUSG00000050493	Fam167b	family with sequence similarity 167, member B	60.0746	132.534	0.457371	-1.12856	0.00585888	0.171919
ENSMUSG00000032860	P2ry2	purinergic receptor P2Y, G-protein coupled 2	75.9314	150.421	0.508064	-0.976919	0.00589169	0.172387
ENSMUSG00000031274	Col4a5	collagen, type IV, alpha 5	406.691	748.237	0.544141	-0.877947	0.00588592	0.172387
ENSMUSG00000020566	Atp6v1c2	ATPase, H+ transporting, lysosomal V1 subunit C2	159.793	334.021	0.47995	-1.05905	0.00598589	0.174659
ENSMUSG00000015468	Notch4	notch 4	469.979	1245.83	0.377742	-1.40453	0.00599162	0.174659
ENSMUSG00000037892	Pcdh18	protocadherin 18	19.1829	106.3	0.188098	-2.41044	0.00600356	0.174659
ENSMUSG00000053886	Sh2d4a	SH2 domain containing 4A	262.174	495.976	0.529552	-0.917157	0.0060022	0.174659
ENSMUSG00000061815	Rufy4	RUN and FYVE domain containing 4	44.5801	96.1328	0.469256	-1.09155	0.0060401	0.174785
ENSMUSG00000012350	Ehf	ets homologous factor	399.773	929.421	0.430744	-1.2151	0.00604514	0.174785
ENSMUSG00000074899	Sptbn5	spectrin beta, non-erythrocytic 5	43.1263	125.691	0.348299	-1.5216	0.00602263	0.174785
ENSMUSG00000062184	Hs6st2	heparan sulfate 6-O-sulfotransferase 2	8.18221	30.7496	0.289207	-1.78983	0.00605069	0.174785
ENSMUSG00000031397	Tktl1	transketolase-like 1	1.22936	25.2508	0.0849256	-3.55766	0.00603922	0.174785
ENSMUSG00000079277	Hoxd3	homeobox D3	74.485	170.34	0.440556	-1.1826	0.00608722	0.175345
ENSMUSG00000030352	Tspan9	tetraspanin 9	428.612	772.414	0.555475	-0.848206	0.00610849	0.17571
ENSMUSG00000020019	Ntn4	netrin 4	985.399	1716.04	0.574476	-0.799681	0.00617203	0.177287
ENSMUSG00000020914	Top2a	topoisomerase (DNA) II alpha	78.3459	180.438	0.437317	-1.19325	0.00626219	0.178372
ENSMUSG00000022220	Adcy4	adenylate cyclase 4	150.828	310.334	0.487668	-1.03603	0.00625452	0.178372
ENSMUSG00000027861	Casq2	calsequestrin 2	1.01338	13.1766	0.142022	-2.81582	0.00623765	0.178372
ENSMUSG00000008384	Sertad1	SERTA domain containing 1	233.11	424.706	0.549934	-0.862669	0.00625002	0.178372
ENSMUSG00000019539	Rcn3	reticulocalbin 3, EF-hand calcium binding domain	94.6911	192.501	0.494525	-1.01588	0.00624107	0.178372
ENSMUSG00000002997	Prkar2b	protein kinase, cAMP dependent regulatory, type II beta	22.4289	62.566	0.368576	-1.43997	0.00628804	0.17861
ENSMUSG00000082280	Gm5847	predicted gene 5847	44.507	111.485	0.404562	-1.30557	0.00628045	0.17861
ENSMUSG00000025432	Avil	advillin	12.3409	40.8748	0.31859	-1.65023	0.00632218	0.179146
ENSMUSG00000036103	Colec12	collectin sub-family member 12	52.3508	134.04	0.395075	-1.3398	0.00632446	0.179146
ENSMUSG00000032514	Ttc21a	tetratricopeptide repeat domain 21A	39.527	190.193	0.21197	-2.23807	0.00636324	0.179746
ENSMUSG00000037736	Limch1	LIM and calponin homology domains 1	1190.41	2050.9	0.58064	-0.784284	0.00637777	0.179908
ENSMUSG00000054690	Emcn	endomucin	613.59	1172.61	0.523675	-0.933258	0.00639305	0.18009
ENSMUSG00000046714	Foxc2	forkhead box C2	24.827	67.2903	0.378195	-1.4028	0.00646362	0.181827
ENSMUSG00000026343	Gpr39	G protein-coupled receptor 39	22.644	54.5566	0.425584	-1.23248	0.00647776	0.181974
ENSMUSG00000006586	Runx1t1	runt-related transcription factor 1; translocated to, 1 (cyclin D-related)	38.6293	96.914	0.404736	-1.30495	0.00652618	0.183083
ENSMUSG00000037031	Tspan15	tetraspanin 15	111.304	243.501	0.459321	-1.12242	0.00656783	0.183771
ENSMUSG00000022537	Tmem44	transmembrane protein 44	143.742	302.183	0.47741	-1.0667	0.00656871	0.183771
ENSMUSG00000037962	Rflna	refilin A	14.711	47.1391	0.326366	-1.61544	0.00658581	0.183997
ENSMUSG00000045876	Pcdhb8	protocadherin beta 8	0	8.50579	0.105199	-3.24881	0.00670138	0.186461
ENSMUSG00000004631	Sgce	sarcoglycan, epsilon	25.0673	72.0987	0.356605	-1.4876	0.00672105	0.186754
ENSMUSG00000023411	Nfatc4	nuclear factor of activated T cells, cytoplasmic, calcineurin dependent 4	6.54983	63.4337	0.117172	-3.0933	0.00676506	0.187217
ENSMUSG00000028517	Plpp3	phospholipid phosphatase 3	895.776	1519.81	0.58967	-0.76202	0.00675021	0.187217
ENSMUSG00000093587	Gm20554	predicted gene, 20554	29.5812	68.0204	0.443075	-1.17438	0.00682803	0.188444
ENSMUSG00000034205	Loxl2	lysyl oxidase-like 2	78.7364	156.656	0.505761	-0.983473	0.00681936	0.188444
ENSMUSG00000005973	Rcn1	reticulocalbin 1	127.643	264.053	0.48535	-1.0429	0.00686089	0.188587
ENSMUSG00000006386	Tek	endothelial-specific receptor tyrosine kinase	680.58	1369.11	0.497465	-1.00733	0.006858	0.188587
ENSMUSG00000092323	BB365896	expressed sequence BB365896	31.0196	75.734	0.417281	-1.26091	0.00684369	0.188587
ENSMUSG00000021806	Nid2	nidogen 2	213.519	409.966	0.521988	-0.93791	0.00689212	0.188975
ENSMUSG00000090291	Lrrc10b	leucine rich repeat containing 10B	0.819574	14.0888	0.120591	-3.05181	0.00691865	0.188975
ENSMUSG00000037605	Adgrl3	adhesion G protein-coupled receptor L3	26.979	79.2288	0.34874	-1.51978	0.0069213	0.188975
ENSMUSG00000008153	Clstn3	calsyntenin 3	0.409787	9.69927	0.131765	-2.92396	0.00690916	0.188975
ENSMUSG00000034235	Usp54	ubiquitin specific peptidase 54	329.494	580.23	0.56861	-0.814487	0.00699082	0.190619
ENSMUSG00000027859	Ngf	nerve growth factor	6.15544	26.8384	0.257035	-1.95996	0.00710405	0.192933
ENSMUSG00000041577	Prelp	proline arginine-rich end leucine-rich repeat	57.3148	147.811	0.391873	-1.35154	0.00711555	0.192989
ENSMUSG00000022438	Parvb	parvin, beta	147.571	278.53	0.531504	-0.911848	0.00716569	0.193834
ENSMUSG00000047497	Adamts12	a disintegrin-like and metallopeptidase (reprolysin type) with thrombospondin type 1 motif, 12	11.0132	33.4517	0.348696	-1.51996	0.00718617	0.194131
ENSMUSG00000062859	Tcp11	t-complex protein 11	8.9997	31.2905	0.309679	-1.69115	0.00722816	0.195007
ENSMUSG00000005958	Ephb3	Eph receptor B3	46.3303	104.726	0.447667	-1.1595	0.00725014	0.195085
ENSMUSG00000002980	Bcam	basal cell adhesion molecule	853.478	1819.97	0.469244	-1.09159	0.00724114	0.195085
ENSMUSG00000020032	Nuak1	NUAK family, SNF1-like kinase, 1	275.588	510.274	0.540977	-0.886361	0.00726832	0.195317
ENSMUSG00000035606	Ky	kyphoscoliosis peptidase	2.65253	24.9735	0.140625	-2.83007	0.00728507	0.19551
ENSMUSG00000006369	Fbln1	fibulin 1	106.822	420.825	0.255607	-1.968	0.00730188	0.195704
ENSMUSG00000001098	Kctd10	potassium channel tetramerisation domain containing 10	246.531	443.886	0.556392	-0.845825	0.00732675	0.196113
ENSMUSG00000038776	Ephx1	epoxide hydrolase 1, microsomal	486.448	835.053	0.583035	-0.778347	0.00741579	0.197977
ENSMUSG00000021838	Samd4	sterile alpha motif domain containing 4	106.347	285.194	0.375083	-1.41472	0.00741487	0.197977
ENSMUSG00000026640	Plxna2	plexin A2	647.357	1340.18	0.483421	-1.04865	0.00745504	0.198248
ENSMUSG00000043259	Fam13c	family with sequence similarity 13, member C	56.6894	135.433	0.422842	-1.24181	0.00744121	0.198248
ENSMUSG00000046841	Ckap4	cytoskeleton-associated protein 4	168.187	313.128	0.538591	-0.892738	0.00744709	0.198248
ENSMUSG00000025900	Rp1	retinitis pigmentosa 1 (human)	3.36675	20.9792	0.198676	-2.33151	0.00747805	0.198601
ENSMUSG00000053702	Nebl	nebulette	79.8068	171.853	0.467487	-1.097	0.00750317	0.198953
ENSMUSG00000074766	Ism1	isthmin 1, angiogenesis inhibitor	7.69599	28.4748	0.295031	-1.76106	0.00752053	0.198953
ENSMUSG00000026421	Csrp1	cysteine and glycine-rich protein 1	452.743	980.426	0.462331	-1.113	0.00761623	0.201224
ENSMUSG00000056071	S100a9	S100 calcium binding protein A9 (calgranulin B)	10.6219	39.3476	0.288046	-1.79563	0.00764429	0.201705
ENSMUSG00000086243	Gm12121	predicted gene 12121	20.1697	72.6916	0.287274	-1.7995	0.00767805	0.202334
ENSMUSG00000025666	Tmem47	transmembrane protein 47	39.7558	116.675	0.346344	-1.52972	0.00770536	0.202792
ENSMUSG00000066456	Hmgn3	high mobility group nucleosomal binding domain 3	76.0007	150.081	0.509665	-0.97238	0.00772935	0.203161
ENSMUSG00000017314	Mpp2	membrane protein, palmitoylated 2 (MAGUK p55 subfamily member 2)	43.7365	89.7751	0.492828	-1.02084	0.00774409	0.203287
ENSMUSG00000055538	Zcchc24	zinc finger, CCHC domain containing 24	104.554	208.112	0.504774	-0.986291	0.00777287	0.203781
ENSMUSG00000022330	Osr2	odd-skipped related 2	121.626	248.793	0.490912	-1.02646	0.00796464	0.208033
ENSMUSG00000015957	Wnt11	wingless-type MMTV integration site family, member 11	12.1385	38.0075	0.336818	-1.56996	0.00795766	0.208033
ENSMUSG00000039552	Rsph4a	radial spoke head 4 homolog A (Chlamydomonas)	12.734	39.729	0.337204	-1.56831	0.00802523	0.209294
ENSMUSG00000081303	Gm16011	predicted gene 16011	0	7.86696	0.112778	-3.14844	0.0080344	0.209294
ENSMUSG00000064724	Gm25852	predicted gene, 25852	3.81202	21.4179	0.21465	-2.21994	0.0081255	0.211398
ENSMUSG00000070509	Rgma	repulsive guidance molecule family member A	65.6233	147.962	0.447251	-1.16084	0.00813774	0.211447
ENSMUSG00000022676	Snai2	snail family zinc finger 2	32.7042	81.3604	0.409228	-1.28902	0.00818676	0.21245
ENSMUSG00000027858	Tspan2	tetraspanin 2	14.1893	127.333	0.118358	-3.07877	0.00822163	0.213084
ENSMUSG00000061143	Maml3	mastermind like 3 (Drosophila)	279.999	509.961	0.549944	-0.862645	0.00823909	0.213113
ENSMUSG00000005672	Kit	kit oncogene	241.703	501.709	0.482791	-1.05053	0.0082436	0.213113
ENSMUSG00000020674	Pxdn	peroxidasin	281.878	490.569	0.57546	-0.797213	0.00830091	0.214323
ENSMUSG00000070644	Etnk2	ethanolamine kinase 2	60.0382	158.796	0.381976	-1.38845	0.00842339	0.215978
ENSMUSG00000039835	Nhsl1	NHS-like 1	453.272	778.23	0.582975	-0.778493	0.00839463	0.215978
ENSMUSG00000043822	Adamtsl5	ADAMTS-like 5	24.5954	69.4762	0.363178	-1.46125	0.00845783	0.216459
ENSMUSG00000067629	Syngap1	synaptic Ras GTPase activating protein 1 homolog (rat)	60.5963	129.008	0.473788	-1.07769	0.00848558	0.216897
ENSMUSG00000037936	Scarb1	scavenger receptor class B, member 1	186.799	333.293	0.561779	-0.831925	0.00853081	0.21752
ENSMUSG00000021294	Kif26a	kinesin family member 26A	77.4961	225.857	0.346016	-1.53109	0.00854361	0.217564
ENSMUSG00000034402	Kcnh5	potassium voltage-gated channel, subfamily H (eag-related), member 5	17.7667	49.8223	0.369262	-1.43728	0.00862891	0.219189
ENSMUSG00000041624	Gucy1a2	guanylate cyclase 1, soluble, alpha 2	27.9047	139.734	0.205385	-2.2836	0.0086187	0.219189
ENSMUSG00000033910	Gucy1a3	guanylate cyclase 1, soluble, alpha 3	128.511	355.815	0.362963	-1.46211	0.00869016	0.220471
ENSMUSG00000053963	Stum	mechanosensory transduction mediator	17.1684	78.6039	0.228235	-2.13141	0.00876503	0.221908
ENSMUSG00000039529	Atp8b1	ATPase, class I, type 8B, member 1	203.196	427.746	0.476263	-1.07017	0.00879027	0.221908
ENSMUSG00000027827	Kcnab1	potassium voltage-gated channel, shaker-related subfamily, beta member 1	20.6935	117.659	0.182821	-2.45149	0.00878543	0.221908
ENSMUSG00000033960	9430020K01Rik	RIKEN cDNA 9430020K01 gene	510.655	1409.85	0.362656	-1.46333	0.00882904	0.222337
ENSMUSG00000046743	Fat4	FAT atypical cadherin 4	220.938	482.519	0.459005	-1.12342	0.00886623	0.222724
ENSMUSG00000055172	C1ra	complement component 1, r subcomponent A	36.4377	89.5005	0.413674	-1.27344	0.00888383	0.222892
ENSMUSG00000038587	Akap12	A kinase (PRKA) anchor protein (gravin) 12	1075.42	2606.08	0.412884	-1.27619	0.00889954	0.223013
ENSMUSG00000036862	Dchs1	dachsous 1 (Drosophila)	139.948	278.61	0.504085	-0.98826	0.00896781	0.224448
ENSMUSG00000049107	Ntf3	neurotrophin 3	8.98279	35.6592	0.272313	-1.87666	0.00898017	0.224482
ENSMUSG00000033377	Palmd	palmdelphin	94.3736	260.557	0.364638	-1.45547	0.00903494	0.225575
ENSMUSG00000020135	Apc2	adenomatosis polyposis coli 2	42.8399	97.6271	0.444501	-1.16974	0.00904764	0.225617
ENSMUSG00000051726	Kcnf1	potassium voltage-gated channel, subfamily F, member 1	1.01338	12.21	0.152414	-2.71393	0.00915267	0.227957
ENSMUSG00000060985	Tdrd5	tudor domain containing 5	8.60849	34.9809	0.267044	-1.90485	0.00925058	0.229189
ENSMUSG00000021373	Cap2	CAP, adenylate cyclase-associated protein, 2 (yeast)	7.5309	84.8631	0.0993547	-3.33127	0.00926654	0.229189
ENSMUSG00000038319	Kcnh2	potassium voltage-gated channel, subfamily H (eag-related), member 2	12.8347	36.2575	0.371325	-1.42924	0.00924828	0.229189
ENSMUSG00000032006	Pdgfd	platelet-derived growth factor, D polypeptide	247.483	432.892	0.572685	-0.804187	0.00928069	0.229189
ENSMUSG00000010660	Plcd1	phospholipase C, delta 1	59.5234	124.078	0.483887	-1.04726	0.0092288	0.229189
ENSMUSG00000050334	C130071C03Rik	RIKEN cDNA C130071C03 gene	2.60482	18.5724	0.184178	-2.44082	0.00940284	0.231925
ENSMUSG00000035168	Tanc1	tetratricopeptide repeat, ankyrin repeat and coiled-coil containing 1	1847.96	2978.81	0.620498	-0.688502	0.00944287	0.232632
ENSMUSG00000040009	Gnaz	guanine nucleotide binding protein, alpha z subunit	73.5181	149.503	0.495128	-1.01413	0.00954987	0.23442
ENSMUSG00000026463	Atp2b4	ATPase, Ca++ transporting, plasma membrane 4	806.202	1418.87	0.568504	-0.814757	0.0096468	0.236217
ENSMUSG00000020160	Meis1	Meis homeobox 1	64.3442	152.888	0.424622	-1.23575	0.00964509	0.236217
ENSMUSG00000032198	Dock6	dedicator of cytokinesis 6	581.764	1288.4	0.451967	-1.14571	0.0096578	0.236217
ENSMUSG00000087594	BC039771	cDNA sequence BC039771	16.0507	50.9306	0.328337	-1.60675	0.00968518	0.236321
ENSMUSG00000029669	Tspan12	tetraspanin 12	214.24	405.728	0.529199	-0.918119	0.00969985	0.236396
ENSMUSG00000047414	Flrt2	fibronectin leucine rich transmembrane protein 2	36.0824	83.6015	0.438318	-1.18995	0.00975989	0.237249
ENSMUSG00000017007	Rbpjl	recombination signal binding protein for immunoglobulin kappa J region-like	30.946	132.024	0.240152	-2.05798	0.00976562	0.237249
ENSMUSG00000070576	Mn1	meningioma 1	120.356	230.287	0.524698	-0.930441	0.00988134	0.239107
ENSMUSG00000037362	Nov	nephroblastoma overexpressed gene	0.505001	11.1641	0.123725	-3.01479	0.0100273	0.242022
ENSMUSG00000022358	Fbxo32	F-box protein 32	116.503	222.88	0.524846	-0.930033	0.0100492	0.242022
ENSMUSG00000053062	Jam2	junction adhesion molecule 2	202.405	400.036	0.507199	-0.979377	0.0100445	0.242022
ENSMUSG00000027656	Wisp2	WNT1 inducible signaling pathway protein 2	0.933571	15.3555	0.118221	-3.08044	0.010047	0.242022
ENSMUSG00000026295	Spp2	secreted phosphoprotein 2	351.944	756.756	0.465776	-1.10229	0.0102633	0.244633
ENSMUSG00000042523	Dnal1	dynein, axonemal, light chain 1	101.455	192.823	0.528602	-0.919746	0.0102848	0.244633
ENSMUSG00000078202	Nrarp	Notch-regulated ankyrin repeat protein	65.3596	153.81	0.428653	-1.22212	0.0102717	0.244633
ENSMUSG00000039476	Prrx2	paired related homeobox 2	0.387622	11.1641	0.114075	-3.13194	0.0102389	0.244633
ENSMUSG00000070880	Gad1	glutamate decarboxylase 1	8.19553	36.3793	0.246006	-2.02324	0.0102894	0.244633
ENSMUSG00000037239	Spred3	sprouty-related, EVH1 domain containing 3	23.7672	59.9535	0.406329	-1.29928	0.0102833	0.244633
ENSMUSG00000022357	Klhl38	kelch-like 38	1.98244	16.5341	0.170094	-2.5556	0.0103125	0.244817
ENSMUSG00000090053	Palm2	paralemmin 2	1.34336	12.3645	0.175342	-2.51175	0.0103633	0.244964
ENSMUSG00000032128	Robo3	roundabout guidance receptor 3	62.9755	136.317	0.465895	-1.10192	0.0104318	0.246299
ENSMUSG00000047861	Foxi1	forkhead box I1	174.203	421.424	0.414756	-1.26966	0.0104717	0.246955
ENSMUSG00000021135	Slc10a1	solute carrier family 10 (sodium/bile acid cotransporter family), member 1	65.1771	147.073	0.446922	-1.16191	0.0105994	0.248927
ENSMUSG00000033032	Afap1l1	actin filament associated protein 1-like 1	321.017	567.286	0.566647	-0.819477	0.0105809	0.248927
ENSMUSG00000028435	Aqp3	aquaporin 3	737.452	1358.71	0.543096	-0.880722	0.0105873	0.248927
ENSMUSG00000090665	Gad1-ps	glutamate decarboxylase 1, pseudogene	0.387622	15.7397	0.0828939	-3.59259	0.0106357	0.248944
ENSMUSG00000035165	Kcne3	potassium voltage-gated channel, Isk-related subfamily, gene 3	12.7984	41.4174	0.3253	-1.62016	0.0106844	0.248944
ENSMUSG00000059708	Akap17b	A kinase (PRKA) anchor protein 17B	125.507	231.338	0.544496	-0.877006	0.0106306	0.248944
ENSMUSG00000041479	Syt15	synaptotagmin XV	41.4248	91.3199	0.459541	-1.12174	0.010725	0.249171
ENSMUSG00000024743	Syt7	synaptotagmin VII	52.5497	120.979	0.439007	-1.18768	0.0107387	0.249171
ENSMUSG00000052852	Reep1	receptor accessory protein 1	12.9176	38.6088	0.351378	-1.5089	0.0107486	0.249171
ENSMUSG00000031328	Flna	filamin, alpha	3452.97	8938.45	0.386374	-1.37193	0.010717	0.249171
ENSMUSG00000022096	Hr	hairless	54.1049	148.241	0.369234	-1.43739	0.0107722	0.249433
ENSMUSG00000048763	Hoxb3	homeobox B3	58.7673	113.618	0.521449	-0.939401	0.0108081	0.249982
ENSMUSG00000050821	Fam131a	family with sequence similarity 131, member A	17.442	46.3499	0.389483	-1.36037	0.0108368	0.250362
ENSMUSG00000021379	Id4	inhibitor of DNA binding 4	100.65	218.425	0.463256	-1.11012	0.0108791	0.250775
ENSMUSG00000029708	Gcc1	golgi coiled coil 1	559.384	949.504	0.589565	-0.762277	0.0108792	0.250775
ENSMUSG00000000204	Slfn4	schlafen 4	0.603598	54.7768	0.0287503	-5.12028	0.0109886	0.251593
ENSMUSG00000039830	Olig2	oligodendrocyte transcription factor 2	0	10.8353	0.0844931	-3.56502	0.0109819	0.251593
ENSMUSG00000026883	Dab2ip	disabled 2 interacting protein	793.67	1320.32	0.601424	-0.733546	0.0109832	0.251593
ENSMUSG00000035245	Eogt	EGF domain-specific O-linked N-acetylglucosamine (GlcNAc) transferase	271.351	483.53	0.562093	-0.83112	0.0109704	0.251593
ENSMUSG00000030782	Tgfb1i1	transforming growth factor beta 1 induced transcript 1	57.3731	190.301	0.305138	-1.71247	0.0109556	0.251593
ENSMUSG00000070304	Scn2b	sodium channel, voltage-gated, type II, beta	12.3497	36.0335	0.360477	-1.47202	0.0109806	0.251593
ENSMUSG00000004655	Aqp1	aquaporin 1	3747.41	7529.53	0.497762	-1.00647	0.0110108	0.251818
ENSMUSG00000036158	Prickle1	prickle planar cell polarity protein 1	147.73	270.757	0.547292	-0.869618	0.0110637	0.252032
ENSMUSG00000039954	Stk32a	serine/threonine kinase 32A	43.1025	91.4884	0.476843	-1.06841	0.0110695	0.252032
ENSMUSG00000073555	Gm4951	predicted gene 4951	53.7172	120.004	0.452194	-1.14499	0.0110519	0.252032
ENSMUSG00000025529	Zfp711	zinc finger protein 711	30.3478	65.2461	0.473203	-1.07947	0.011043	0.252032
ENSMUSG00000032131	Abcg4	ATP-binding cassette, sub-family G (WHITE), member 4	1.24476	12.7507	0.163247	-2.61487	0.0111336	0.252927
ENSMUSG00000022661	Cd200	CD200 antigen	266.229	538.051	0.495739	-1.01235	0.0112136	0.254326
ENSMUSG00000059742	Kcnh7	potassium voltage-gated channel, subfamily H (eag-related), member 7	35.0425	73.7054	0.482463	-1.05151	0.0113344	0.256348
ENSMUSG00000052534	Pbx1	pre B cell leukemia homeobox 1	1195.4	2028.87	0.5894	-0.762681	0.0114467	0.258602
ENSMUSG00000017734	Dbndd2	dysbindin (dystrobrevin binding protein 1) domain containing 2	16.4232	46.8561	0.364074	-1.4577	0.0115563	0.260788
ENSMUSG00000052504	Epha3	Eph receptor A3	25.96	66.6	0.398816	-1.32621	0.0116039	0.261574
ENSMUSG00000043144	Aqp6	aquaporin 6	151.716	345.69	0.440496	-1.1828	0.0116433	0.261893
ENSMUSG00000017631	Abr	active BCR-related gene	1033.78	1784.01	0.579708	-0.786603	0.0117266	0.263468
ENSMUSG00000047821	Trim16	tripartite motif-containing 16	92.8676	189.431	0.492922	-1.02057	0.0118009	0.264631
ENSMUSG00000021367	Edn1	endothelin 1	113.233	228.203	0.498394	-1.00464	0.0118043	0.264631
ENSMUSG00000037624	Kcnk2	potassium channel, subfamily K, member 2	2.25476	15.8557	0.193096	-2.37261	0.0118525	0.265129
ENSMUSG00000030322	Mbd4	methyl-CpG binding domain protein 4	76.2415	162.758	0.471679	-1.08412	0.0118775	0.265398
ENSMUSG00000035441	Myo1d	myosin ID	876.686	1436.14	0.610716	-0.711427	0.0119048	0.265717
ENSMUSG00000027254	Map1a	microtubule-associated protein 1 A	77.5341	253.843	0.308166	-1.69822	0.0119352	0.265815
ENSMUSG00000044562	Rasip1	Ras interacting protein 1	180.272	444.046	0.407311	-1.2958	0.0119257	0.265815
ENSMUSG00000039457	Ppl	periplakin	352.319	748.494	0.471409	-1.08495	0.0119753	0.266128
ENSMUSG00000038583	Pln	phospholamban	26.8612	142.724	0.193852	-2.36698	0.0120226	0.266347
ENSMUSG00000026880	Stom	stomatin	177.855	344.858	0.517133	-0.951393	0.0120243	0.266347
ENSMUSG00000034063	4930590J08Rik	RIKEN cDNA 4930590J08 gene	0	7.30441	0.120418	-3.05388	0.012161	0.268793
ENSMUSG00000041737	Tmem45b	transmembrane protein 45b	87.6592	160.116	0.550282	-0.861758	0.0121864	0.269062
ENSMUSG00000001661	Hoxc6	homeobox C6	125.681	220.245	0.572582	-0.804445	0.0122677	0.270564
ENSMUSG00000038872	Zfhx3	zinc finger homeobox 3	1583.04	3374.49	0.469278	-1.09149	0.0123745	0.272627
ENSMUSG00000037579	Kcnh3	potassium voltage-gated channel, subfamily H (eag-related), member 3	2.22058	17.5651	0.173475	-2.5272	0.0125293	0.275443
ENSMUSG00000086003	B230206L02Rik	RIKEN cDNA B230206L02 gene	9.40142	30.6963	0.328159	-1.60754	0.0126214	0.276871
ENSMUSG00000030549	Rhcg	Rhesus blood group-associated C glycoprotein	680.889	1395.85	0.488163	-1.03456	0.0126512	0.277226
ENSMUSG00000036223	Ska1	spindle and kinetochore associated complex subunit 1	0	7.14887	0.122716	-3.0266	0.012726	0.278567
ENSMUSG00000021478	Drd1	dopamine receptor D1	0	7.33602	0.119961	-3.05936	0.0128487	0.280952
ENSMUSG00000041040	Fam117b	family with sequence similarity 117, member B	1064.51	1768.07	0.602298	-0.73145	0.0129829	0.28328
ENSMUSG00000006221	Hspb7	heat shock protein family, member 7 (cardiovascular)	43.5112	87.3248	0.503949	-0.98865	0.0130018	0.283389
ENSMUSG00000054580	Pla2r1	phospholipase A2 receptor 1	106.806	228.28	0.470196	-1.08867	0.0130712	0.283826
ENSMUSG00000041729	Coro2b	coronin, actin binding protein, 2B	79.4329	166.354	0.480616	-1.05704	0.0130774	0.283826
ENSMUSG00000015093	Clic3	chloride intracellular channel 3	15.6057	43.3587	0.37435	-1.41754	0.0130951	0.283909
ENSMUSG00000043342	Hoxd9	homeobox D9	163.544	286.323	0.57268	-0.804198	0.0131905	0.285672
ENSMUSG00000034413	Neurl1b	neuralized E3 ubiquitin protein ligase 1B	352.543	584.193	0.604148	-0.727026	0.013226	0.286139
ENSMUSG00000040289	Hey1	hairy/enhancer-of-split related with YRPW motif 1	22.6552	62.2194	0.374177	-1.41821	0.013275	0.286895
ENSMUSG00000045392	Olfr1033	olfactory receptor 1033	2.45534	20.5276	0.160507	-2.63929	0.0133127	0.287404
ENSMUSG00000038418	Egr1	early growth response 1	8179.05	15096.6	0.54181	-0.884141	0.0133751	0.28784
ENSMUSG00000050549	5730508B09Rik	RIKEN cDNA 5730508B09 gene	28.3342	67.2753	0.429645	-1.21878	0.0133624	0.28784
ENSMUSG00000025498	Irf7	interferon regulatory factor 7	198.661	363.724	0.54743	-0.869254	0.0133491	0.28784
ENSMUSG00000028456	Unc13b	unc-13 homolog B (C. elegans)	281.813	468.883	0.601879	-0.732456	0.013413	0.288322
ENSMUSG00000019124	Scrn1	secernin 1	56.367	110.457	0.514701	-0.958193	0.0134258	0.288322
ENSMUSG00000026478	Lamc1	laminin, gamma 1	907.807	1485.65	0.611311	-0.710022	0.0135016	0.288962
ENSMUSG00000026893	Gca	grancalcin	159.291	299.381	0.533626	-0.906098	0.01353	0.288962
ENSMUSG00000042766	Trim46	tripartite motif-containing 46	79.4125	146.618	0.544732	-0.876382	0.0135026	0.288962
ENSMUSG00000033502	Cdc14a	CDC14 cell division cycle 14A	361.996	628.567	0.57658	-0.794407	0.0135207	0.288962
ENSMUSG00000032092	Mpzl2	myelin protein zero-like 2	53.1386	110.213	0.486801	-1.0386	0.0134902	0.288962
ENSMUSG00000034450	Gulo	gulonolactone (L-) oxidase	2.02001	15.7121	0.180708	-2.46827	0.0135807	0.289097
ENSMUSG00000047033	Pcdhb15	protocadherin beta 15	3.23058	18.1832	0.220535	-2.18092	0.0135892	0.289097
ENSMUSG00000045954	Sdpr	serum deprivation response	772.272	1380.47	0.559746	-0.837156	0.0137371	0.289471
ENSMUSG00000021759	Plpp1	phospholipid phosphatase 1	647.778	1144.46	0.566389	-0.820135	0.0137655	0.289471
ENSMUSG00000083305	Gm13315	predicted gene 13315	3.66253	41.3125	0.110193	-3.1819	0.0136992	0.289471
ENSMUSG00000001864	Aif1l	allograft inflammatory factor 1-like	1443.32	2533.59	0.569845	-0.811359	0.0136446	0.289471
ENSMUSG00000074682	Zcchc3	zinc finger, CCHC domain containing 3	56.2817	110.662	0.51299	-0.962997	0.0137251	0.289471
ENSMUSG00000029392	Rilpl1	Rab interacting lysosomal protein-like 1	211.623	364.964	0.580993	-0.783406	0.0136424	0.289471
ENSMUSG00000038521	C1s1	complement component 1, s subcomponent 1	30.5912	65.9424	0.471917	-1.0834	0.0136779	0.289471
ENSMUSG00000068959	Zfp619	zinc finger protein 619	51.4764	121.732	0.427569	-1.22577	0.013658	0.289471
ENSMUSG00000090958	Lrrc32	leucine rich repeat containing 32	412.917	878.866	0.470431	-1.08794	0.0137558	0.289471
ENSMUSG00000038604	Fam65a	family with sequence similarity 65, member A	770.942	1250.35	0.616889	-0.696918	0.013739	0.289471
ENSMUSG00000052143	Gm9869	predicted gene 9869	12.0352	38.1443	0.333003	-1.58639	0.0137022	0.289471
ENSMUSG00000084411	Gm11510	predicted gene 11510	5.48197	24.5388	0.253809	-1.97819	0.0138208	0.289797
ENSMUSG00000031290	Lrch2	leucine-rich repeats and calponin homology (CH) domain containing 2	1.93811	25.5756	0.110557	-3.17714	0.0138722	0.290577
ENSMUSG00000026452	Syt2	synaptotagmin II	10.005	44.8208	0.240175	-2.05784	0.0139059	0.290985
ENSMUSG00000063060	Sox7	SRY (sex determining region Y)-box 7	98.6083	232.647	0.426319	-1.22999	0.0139902	0.291717
ENSMUSG00000036885	Arhgef26	Rho guanine nucleotide exchange factor (GEF) 26	95.2863	238.596	0.40187	-1.3152	0.0139884	0.291717
ENSMUSG00000025477	Inpp5a	inositol polyphosphate-5-phosphatase A	452.374	760.838	0.595106	-0.748782	0.0139581	0.291717
ENSMUSG00000055148	Klf2	Kruppel-like factor 2 (lung)	1651.31	2765.59	0.597237	-0.743624	0.014136	0.293992
ENSMUSG00000086740	Gm17029	predicted gene 17029	46.0438	94.7967	0.49108	-1.02597	0.014173	0.29446
ENSMUSG00000086567	Gm2830	predicted gene 2830	7.11248	25.029	0.311671	-1.68191	0.014229	0.295025
ENSMUSG00000027442	Cst8	cystatin 8 (cystatin-related epididymal spermatogenic)	0	7.86402	0.112816	-3.14796	0.0143001	0.295898
ENSMUSG00000033278	Ptprm	protein tyrosine phosphatase, receptor type, M	558.656	1103.27	0.50681	-0.980484	0.0143843	0.296739
ENSMUSG00000057751	Megf6	multiple EGF-like-domains 6	5.1997	21.5022	0.275515	-1.8598	0.0144289	0.297358
ENSMUSG00000001029	Icam2	intercellular adhesion molecule 2	191.389	370.609	0.51772	-0.949755	0.0145256	0.299049
ENSMUSG00000038248	Sobp	sine oculis-binding protein homolog (Drosophila)	12.6609	35.0669	0.378766	-1.40062	0.0146069	0.299515
ENSMUSG00000035285	Nat14	N-acetyltransferase 14	20.1319	55.1448	0.376382	-1.40973	0.0145958	0.299515
ENSMUSG00000066571	4931406P16Rik	RIKEN cDNA 4931406P16 gene	618.97	1019.55	0.607484	-0.719081	0.0145666	0.299515
ENSMUSG00000090399	Gm38399	predicted gene, 38399	156.611	285.085	0.550923	-0.860078	0.0146235	0.299554
ENSMUSG00000028047	Thbs3	thrombospondin 3	22.963	53.6979	0.438098	-1.19067	0.0146385	0.299562
ENSMUSG00000066319	Rtp3	receptor transporter protein 3	29.64	69.1295	0.436906	-1.19461	0.0148116	0.302801
ENSMUSG00000068115	Ninl	ninein-like	667.422	1088.51	0.613507	-0.704849	0.0148896	0.304091
ENSMUSG00000069170	Adgrv1	adhesion G protein-coupled receptor V1	19.5864	58.8354	0.34405	-1.53931	0.01493	0.30461
ENSMUSG00000030806	Stx1b	syntaxin 1B	11.074	34.2151	0.342863	-1.5443	0.0149927	0.30528
ENSMUSG00000044345	Marveld1	MARVEL (membrane-associating) domain containing 1	298.826	574.475	0.521006	-0.940627	0.0150334	0.305598
ENSMUSG00000082420	Gm6517	predicted gene 6517	96.2655	183.89	0.526071	-0.92667	0.0150673	0.305598
ENSMUSG00000086807	Platr21	pluripotency associated transcript 21	4.89189	20.3968	0.275364	-1.86059	0.0150682	0.305598
ENSMUSG00000025203	Scd2	stearoyl-Coenzyme A desaturase 2	712.32	1580.49	0.451045	-1.14866	0.0151072	0.306085
ENSMUSG00000022534	Mefv	Mediterranean fever	56.2045	150.994	0.376361	-1.40981	0.0151489	0.306626
ENSMUSG00000058254	Tspan7	tetraspanin 7	176.611	302.973	0.584298	-0.775225	0.0151968	0.307292
ENSMUSG00000068397	Gm10240	predicted gene 10240	50.7903	112.413	0.456652	-1.13083	0.0152394	0.307849
ENSMUSG00000074676	Foxs1	forkhead box S1	2.80201	17.2206	0.208666	-2.26073	0.0152767	0.308296
ENSMUSG00000046694	Fam46b	family with sequence similarity 46, member B	35.4411	69.5219	0.516734	-0.952505	0.0153123	0.308565
ENSMUSG00000036667	Tcaf1	TRPM8 channel-associated factor 1	256.048	429.801	0.596673	-0.744987	0.0153202	0.308565
ENSMUSG00000078349	AW011738	expressed sequence AW011738	19.5463	66.7032	0.303476	-1.72034	0.0153942	0.309212
ENSMUSG00000031503	Col4a2	collagen, type IV, alpha 2	2045.15	3475.41	0.588581	-0.764687	0.0153978	0.309212
ENSMUSG00000028524	Sgip1	SH3-domain GRB2-like (endophilin) interacting protein 1	10.7205	33.8328	0.33648	-1.57141	0.0154476	0.309576
ENSMUSG00000035342	Lzts2	leucine zipper, putative tumor suppressor 2	365.1	627.636	0.582372	-0.779988	0.0155775	0.310605
ENSMUSG00000016128	Stard13	StAR-related lipid transfer (START) domain containing 13	202.81	351.534	0.578128	-0.790538	0.0155888	0.310605
ENSMUSG00000056900	Usp13	ubiquitin specific peptidase 13 (isopeptidase T-3)	0.603598	14.4809	0.103586	-3.27111	0.0156799	0.311931
ENSMUSG00000028195	Cyr61	cysteine rich protein 61	1346.66	2274.72	0.592189	-0.755872	0.0156865	0.311931
ENSMUSG00000036030	Prtg	protogenin	1.78525	15.4595	0.169218	-2.56305	0.0157012	0.311931
ENSMUSG00000026447	Pik3c2b	phosphoinositide-3-kinase, class 2, beta polypeptide	98.7177	190.056	0.521929	-0.938074	0.0158105	0.311978
ENSMUSG00000024210	Ip6k3	inositol hexaphosphate kinase 3	17.237	41.791	0.426187	-1.23044	0.0158101	0.311978
ENSMUSG00000085110	Gm13920	predicted gene 13920	3.38215	18.2912	0.227158	-2.13823	0.0157388	0.311978
ENSMUSG00000027996	Sfrp2	secreted frizzled-related protein 2	99.4918	299.803	0.334079	-1.58174	0.0157745	0.311978
ENSMUSG00000031785	Adgrg1	adhesion G protein-coupled receptor G1	2879.29	4817.97	0.597697	-0.742514	0.015741	0.311978
ENSMUSG00000020256	Aldh1l2	aldehyde dehydrogenase 1 family, member L2	24.0767	61.9688	0.39824	-1.32829	0.0158495	0.312446
ENSMUSG00000054640	Slc8a1	solute carrier family 8 (sodium/calcium exchanger), member 1	2265.36	4906.38	0.461826	-1.11458	0.0158966	0.313072
ENSMUSG00000022871	Fetub	fetuin beta	4.8087	20.9712	0.264378	-1.91933	0.0159777	0.314206
ENSMUSG00000050936	Gm42743	predicted gene 42743	1.03217	24.8576	0.0785908	-3.6695	0.0160157	0.314206
ENSMUSG00000004347	Pde1c	phosphodiesterase 1C	36.4584	111.28	0.333617	-1.58374	0.0160055	0.314206
ENSMUSG00000044927	H1fx	H1 histone family, member X	7.15004	23.8644	0.32778	-1.6092	0.0160777	0.314909
ENSMUSG00000036040	Adamtsl2	ADAMTS-like 2	138.286	299.149	0.464057	-1.10763	0.0161181	0.315307
ENSMUSG00000027221	Chst1	carbohydrate (keratan sulfate Gal-6) sulfotransferase 1	6.36595	24.4625	0.289287	-1.78943	0.0161708	0.316035
ENSMUSG00000022098	Bmp1	bone morphogenetic protein 1	52.9748	108.805	0.491551	-1.02459	0.0162213	0.316719
ENSMUSG00000041361	Myzap	myocardial zonula adherens protein	19.2228	45.5646	0.434295	-1.20325	0.0163268	0.318474
ENSMUSG00000026173	Plcd4	phospholipase C, delta 4	28.2221	68.4008	0.421063	-1.24789	0.0163674	0.318962
ENSMUSG00000033420	Antxr1	anthrax toxin receptor 1	96.4748	230.904	0.420324	-1.25043	0.0164097	0.319176
ENSMUSG00000040424	Hipk4	homeodomain interacting protein kinase 4	3.7833	16.6787	0.270568	-1.88594	0.0163961	0.319176
ENSMUSG00000079333	Gm11096	predicted gene 11096	5.35595	21.0098	0.288778	-1.79197	0.0164682	0.32001
ENSMUSG00000022518	4930562C15Rik	RIKEN cDNA 4930562C15 gene	4.46333	18.9834	0.273393	-1.87095	0.0165215	0.320348
ENSMUSG00000030302	Atp2b2	ATPase, Ca++ transporting, plasma membrane 2	115.979	246.692	0.472276	-1.0823	0.0165033	0.320348
ENSMUSG00000054404	Slfn5	schlafen 5	801.041	1533.73	0.522595	-0.936234	0.016631	0.321643
ENSMUSG00000003341	Atp8b3	ATPase, class I, type 8B, member 3	0	6.65866	0.130571	-2.93709	0.0166691	0.322075
ENSMUSG00000033389	Arhgap44	Rho GTPase activating protein 44	129.533	227.15	0.572139	-0.805563	0.0167239	0.322828
ENSMUSG00000020021	Fgd6	FYVE, RhoGEF and PH domain containing 6	167.832	306.792	0.548525	-0.86637	0.0167586	0.322888
ENSMUSG00000087690	Gm16031	predicted gene 16031	3.76113	17.487	0.25754	-1.95713	0.0167529	0.322888
ENSMUSG00000034107	Ano7	anoctamin 7	6.28952	23.0372	0.30326	-1.72137	0.0168451	0.323804
ENSMUSG00000023942	Slc29a1	solute carrier family 29 (nucleoside transporters), member 1	148.25	255.491	0.581893	-0.781174	0.0168512	0.323804
ENSMUSG00000041559	Fmod	fibromodulin	129.447	233.34	0.556659	-0.845134	0.0168909	0.323909
ENSMUSG00000033191	Tie1	tyrosine kinase with immunoglobulin-like and EGF-like domains 1	476.837	907.705	0.525843	-0.927295	0.0168796	0.323909
ENSMUSG00000025492	Ifitm3	interferon induced transmembrane protein 3	294.255	496.604	0.593352	-0.753039	0.0169452	0.324646
ENSMUSG00000070643	Sox13	SRY (sex determining region Y)-box 13	552.542	891.094	0.620497	-0.688504	0.0169859	0.324816
ENSMUSG00000050100	Hmx2	H6 homeobox 2	14.0458	44.2809	0.332277	-1.58954	0.0170926	0.32655
ENSMUSG00000082154	Gm16464	predicted gene 16464	81.6395	165.496	0.496346	-1.01058	0.0172024	0.328034
ENSMUSG00000025407	Gli1	GLI-Kruppel family member GLI1	11.1848	31.0201	0.380536	-1.3939	0.0172422	0.328486
ENSMUSG00000026728	Vim	vimentin	1713.46	3316.47	0.516796	-0.952333	0.017291	0.328998
ENSMUSG00000054320	Lrrc36	leucine rich repeat containing 36	0.819574	9.79735	0.16852	-2.569	0.0173518	0.329345
ENSMUSG00000056870	Gulp1	GULP, engulfment adaptor PTB domain containing 1	20.1201	57.2483	0.362587	-1.4636	0.0173837	0.329646
ENSMUSG00000046280	She	src homology 2 domain-containing transforming protein E	221.346	443.618	0.500083	-0.99976	0.0174639	0.330859
ENSMUSG00000027799	Nbea	neurobeachin	855.01	1370.46	0.624161	-0.680009	0.0174891	0.331029
ENSMUSG00000026564	Dusp27	dual specificity phosphatase 27 (putative)	0.622381	9.26934	0.157983	-2.66216	0.0175408	0.331699
ENSMUSG00000020620	Abca8b	ATP-binding cassette, sub-family A (ABC1), member 8b	13.4083	45.7059	0.308491	-1.6967	0.0176589	0.333317
ENSMUSG00000062591	Tubb4a	tubulin, beta 4A class IVA	11.2931	36.8269	0.324983	-1.62156	0.0178325	0.335353
ENSMUSG00000036019	Tmtc2	transmembrane and tetratricopeptide repeat containing 2	29.0187	69.5128	0.42572	-1.23202	0.0179469	0.336884
ENSMUSG00000000411	Tssk3	testis-specific serine kinase 3	2.92933	19.7015	0.189809	-2.39738	0.0179844	0.337077
ENSMUSG00000023036	Pcdhgc4	protocadherin gamma subfamily C, 4	633.633	1191.35	0.532254	-0.909813	0.0180127	0.337189
ENSMUSG00000058656	Samd12	sterile alpha motif domain containing 12	41.2364	104.838	0.399065	-1.3253	0.0181931	0.339322
ENSMUSG00000045975	C2cd2	C2 calcium-dependent domain containing 2	313.469	525.155	0.597674	-0.74257	0.0181653	0.339322
ENSMUSG00000050304	Slc25a2	solute carrier family 25 (mitochondrial carrier, ornithine transporter) member 2	12.5037	39.8605	0.330483	-1.59735	0.0182717	0.339709
ENSMUSG00000052371	Hoxd3os1	homeobox D3, opposite strand 1	39.5004	84.0555	0.476164	-1.07047	0.0182804	0.339709
ENSMUSG00000050556	Kcnb1	potassium voltage gated channel, Shab-related subfamily, member 1	81.9906	211.638	0.390291	-1.35738	0.0182365	0.339709
ENSMUSG00000027834	Serpini1	serine (or cysteine) peptidase inhibitor, clade I, member 1	31.5532	148.798	0.217314	-2.20214	0.0182979	0.339726
ENSMUSG00000021493	Pdlim7	PDZ and LIM domain 7	164.51	446.557	0.369807	-1.43515	0.0183872	0.340147
ENSMUSG00000028238	Atp6v0d2	ATPase, H+ transporting, lysosomal V0 subunit D2	338.657	684.364	0.495587	-1.01279	0.0184462	0.340928
ENSMUSG00000078653	Cntd1	cyclin N-terminal domain containing 1	11.7595	34.4865	0.359558	-1.4757	0.0184697	0.341054
ENSMUSG00000021879	Dnah12	dynein, axonemal, heavy chain 12	35.0043	82.3556	0.431936	-1.21111	0.0184898	0.341118
ENSMUSG00000004791	Pgf	placental growth factor	1.86714	13.0894	0.203496	-2.29693	0.0185636	0.34217
ENSMUSG00000038692	Hoxb4	homeobox B4	349.341	569.261	0.614353	-0.70286	0.0186772	0.343953
ENSMUSG00000028776	Tinagl1	tubulointerstitial nephritis antigen-like 1	517.193	1312.17	0.394613	-1.34149	0.0187568	0.344797
ENSMUSG00000038457	Tmem255b	transmembrane protein 255B	2.65253	13.6164	0.249893	-2.00062	0.0187458	0.344797
ENSMUSG00000076163	Mir701	microRNA 701	2.29025	16.2282	0.190981	-2.3885	0.0187831	0.34497
ENSMUSG00000091562	Crybg3	beta-gamma crystallin domain containing 3	728.655	1161.66	0.627574	-0.672143	0.0189299	0.346927
ENSMUSG00000036899	Trpv5	transient receptor potential cation channel, subfamily V, member 5	200.22	445.297	0.450866	-1.14923	0.0189406	0.346927
ENSMUSG00000020638	Cmpk2	cytidine monophosphate (UMP-CMP) kinase 2, mitochondrial	106.68	210.161	0.509941	-0.971597	0.019054	0.348692
ENSMUSG00000039943	Plcb4	phospholipase C, beta 4	337.742	677.611	0.499169	-1.0024	0.0191047	0.349306
ENSMUSG00000041889	Shisa4	shisa family member 4	46.7359	100.665	0.469543	-1.09067	0.0191722	0.349914
ENSMUSG00000034842	Art3	ADP-ribosyltransferase 3	24.8456	55.8016	0.455015	-1.13601	0.0193912	0.353595
ENSMUSG00000041439	Mfsd6	major facilitator superfamily domain containing 6	366.952	600.589	0.611633	-0.709262	0.0194475	0.354305
ENSMUSG00000062561	Gm10118	predicted gene 10118	1.03217	25.528	0.0766046	-3.70643	0.0195927	0.355681
ENSMUSG00000027716	Trpc3	transient receptor potential cation channel, subfamily C, member 3	11.6697	47.78	0.259732	-1.94491	0.0196562	0.356517
ENSMUSG00000020846	Rflnb	refilin B	199.177	341.157	0.585044	-0.773382	0.01973	0.357538
ENSMUSG00000018909	Arrb1	arrestin, beta 1	960.586	1581.77	0.607533	-0.718964	0.0198498	0.358518
ENSMUSG00000018727	Cpsf4l	cleavage and polyadenylation specific factor 4-like	17.255	42.6032	0.418661	-1.25615	0.0199022	0.359066
ENSMUSG00000088453	Gm25706	predicted gene, 25706	0.622381	9.18321	0.159319	-2.65001	0.0200184	0.360054
ENSMUSG00000050666	Vstm4	V-set and transmembrane domain containing 4	10.5812	28.7332	0.389503	-1.36029	0.0201619	0.361834
ENSMUSG00000087041	Gm16295	predicted gene 16295	7.99178	24.2099	0.356677	-1.48731	0.0202016	0.362227
ENSMUSG00000040936	Ulk4	unc-51-like kinase 4	38.5657	83.5751	0.467817	-1.09598	0.0202201	0.362242
ENSMUSG00000003585	Sec14l2	SEC14-like lipid binding 2	13.1727	40.6096	0.340611	-1.5538	0.0203158	0.363319
ENSMUSG00000026833	Olfm1	olfactomedin 1	193.79	351.461	0.552657	-0.855544	0.0203848	0.364234
ENSMUSG00000025213	Kazald1	Kazal-type serine peptidase inhibitor domain 1	5.35803	19.0053	0.317817	-1.65373	0.0205571	0.366991
ENSMUSG00000027748	Trpc4	transient receptor potential cation channel, subfamily C, member 4	2.45872	14.4235	0.22425	-2.15682	0.0207599	0.369642
ENSMUSG00000023000	Dhh	desert hedgehog	15.813	44.1153	0.372667	-1.42404	0.0208573	0.369764
ENSMUSG00000047619	Ddi1	DNA-damage inducible 1	4.46312	25.241	0.20819	-2.26402	0.020788	0.369764
ENSMUSG00000049804	Armcx4	armadillo repeat containing, X-linked 4	153.179	279.024	0.550591	-0.860947	0.0208259	0.369764
ENSMUSG00000016494	Cd34	CD34 antigen	264.445	422.526	0.62675	-0.674038	0.0210257	0.36986
ENSMUSG00000093780	Gm22395	predicted gene, 22395	0	6.30506	0.136891	-2.8689	0.0209806	0.36986
ENSMUSG00000038387	Rras	related RAS viral (r-ras) oncogene	118.66	203.867	0.584089	-0.775741	0.0210231	0.36986
ENSMUSG00000078963	Hsbp1l1	heat shock factor binding protein 1-like 1	18.3654	48.2038	0.393576	-1.34529	0.0212302	0.37122
ENSMUSG00000075569	Rsph10b	radial spoke head 10 homolog B (Chlamydomonas)	7.55306	25.6966	0.320381	-1.64214	0.0212288	0.37122
ENSMUSG00000078954	Arhgap8	Rho GTPase activating protein 8	38.5098	79.6847	0.489681	-1.03009	0.0214765	0.373419
ENSMUSG00000024427	Spry4	sprouty homolog 4 (Drosophila)	187.384	316.346	0.593623	-0.752382	0.0214719	0.373419
ENSMUSG00000092369	1700039E22Rik	RIKEN cDNA 1700039E22 gene	3.8308	18.9232	0.242472	-2.04411	0.0215376	0.373715
ENSMUSG00000031502	Col4a1	collagen, type IV, alpha 1	2722.98	5017.77	0.542758	-0.88162	0.021556	0.373716
ENSMUSG00000029829	Tmem213	transmembrane protein 213	126.816	261.898	0.486181	-1.04043	0.0215925	0.374031
ENSMUSG00000028222	Calb1	calbindin 1	2332.24	5595.5	0.41691	-1.26219	0.0216436	0.374599
ENSMUSG00000028698	Pik3r3	phosphatidylinositol 3 kinase, regulatory subunit, polypeptide 3 (p55)	375.637	661.554	0.568463	-0.814863	0.0218865	0.377205
ENSMUSG00000060424	Pantr1	POU domain, class 3, transcription factor 3 adjacent noncoding transcript 1	37.2892	77.38	0.488508	-1.03355	0.0219956	0.378446
ENSMUSG00000039661	Dusp26	dual specificity phosphatase 26 (putative)	14.6546	39.9438	0.382344	-1.38706	0.0222028	0.381369
ENSMUSG00000058740	Kcnt1	potassium channel, subfamily T, member 1	226.916	379.286	0.599328	-0.738583	0.0222684	0.381527
ENSMUSG00000040434	Large2	LARGE xylosyl- and glucuronyltransferase 2	198.116	324.208	0.612273	-0.707753	0.0222717	0.381527
ENSMUSG00000009035	Tmem184b	transmembrane protein 184b	440.565	703.01	0.627214	-0.67297	0.022368	0.382598
ENSMUSG00000048960	Prex2	phosphatidylinositol-3,4,5-trisphosphate-dependent Rac exchange factor 2	736.1	1232.64	0.597501	-0.742986	0.0226237	0.38568
ENSMUSG00000020810	Cygb	cytoglobin	68.6593	155.435	0.445292	-1.16718	0.0226157	0.38568
ENSMUSG00000041633	Kctd12b	potassium channel tetramerisation domain containing 12b	94.5858	170.609	0.556997	-0.844258	0.0227017	0.386363
ENSMUSG00000013611	Snx31	sorting nexin 31	18.473	53.7633	0.355584	-1.49174	0.0228646	0.387305
ENSMUSG00000089208	Gm26216	predicted gene, 26216	0	6.44566	0.134306	-2.8964	0.0228694	0.387305
ENSMUSG00000033855	Ston1	stonin 1	169.884	284.749	0.598023	-0.741728	0.0229088	0.387306
ENSMUSG00000071176	Arhgef10	Rho guanine nucleotide exchange factor (GEF) 10	194.053	442.369	0.439933	-1.18464	0.0229031	0.387306
ENSMUSG00000030402	Ppm1n	protein phosphatase, Mg2+/Mn2+ dependent, 1N (putative)	5.20309	18.7854	0.313518	-1.67338	0.0229448	0.387594
ENSMUSG00000024534	Sncaip	synuclein, alpha interacting protein (synphilin)	43.125	147.552	0.297035	-1.7513	0.0230664	0.389327
ENSMUSG00000031618	Nr3c2	nuclear receptor subfamily 3, group C, member 2	449.584	696.515	0.645984	-0.63043	0.0231551	0.390179
ENSMUSG00000029211	Gabra4	gamma-aminobutyric acid (GABA) A receptor, subunit alpha 4	0	9.97354	0.0911283	-3.45596	0.0232324	0.391158
ENSMUSG00000026628	Atf3	activating transcription factor 3	3645.34	6555.42	0.556148	-0.846459	0.0233157	0.391914
ENSMUSG00000078915	Hsp25-ps1	heat shock protein 25, pseudogene 1	8.8844	26.8078	0.355454	-1.49227	0.0232991	0.391914
ENSMUSG00000030523	Trpm1	transient receptor potential cation channel, subfamily M, member 1	2.78531	17.1105	0.209012	-2.25834	0.0233758	0.392279
ENSMUSG00000086894	Gm15708	predicted gene 15708	16.5507	42.6963	0.401651	-1.31598	0.0234233	0.39274
ENSMUSG00000037833	Sh2d4b	SH2 domain containing 4B	44.0944	86.2334	0.51694	-0.951931	0.0234937	0.392842
ENSMUSG00000028519	Dab1	disabled 1	41.7169	81.31	0.518976	-0.946261	0.0235055	0.392842
ENSMUSG00000026131	Dst	dystonin	17623	26822.7	0.657031	-0.605967	0.0236058	0.393602
ENSMUSG00000027583	Zbtb46	zinc finger and BTB domain containing 46	218.424	370.603	0.590478	-0.760045	0.023699	0.394783
ENSMUSG00000049892	Rasd1	RAS, dexamethasone-induced 1	237.716	478.743	0.497592	-1.00696	0.0237975	0.395135
ENSMUSG00000089710	Gm15810	predicted gene 15810	5.35803	27.1754	0.225659	-2.14778	0.0237972	0.395135
ENSMUSG00000079965	Gm14853	predicted gene 14853	9.88894	31.148	0.338713	-1.56186	0.0237667	0.395135
ENSMUSG00000027579	Srms	src-related kinase lacking C-terminal regulatory tyrosine and N-terminal myristylation sites	15.4408	37.8303	0.423401	-1.2399	0.0238374	0.395323
ENSMUSG00000034614	Pik3ip1	phosphoinositide-3-kinase interacting protein 1	118.583	218.256	0.545402	-0.874609	0.0238939	0.39552
ENSMUSG00000031994	Adamts8	a disintegrin-like and metallopeptidase (reprolysin type) with thrombospondin type 1 motif, 8	28.1838	92.3282	0.312701	-1.67714	0.0239175	0.39552
ENSMUSG00000031302	Nlgn3	neuroligin 3	4.89845	21.605	0.260935	-1.93824	0.0238985	0.39552
ENSMUSG00000086331	Gm16310	predicted gene 16310	72.1545	132.926	0.546233	-0.872413	0.0240409	0.395957
ENSMUSG00000058152	Chsy3	chondroitin sulfate synthase 3	6.15544	20.0868	0.339333	-1.55923	0.0240048	0.395957
ENSMUSG00000027435	Cd93	CD93 antigen	1219.51	1903.27	0.640931	-0.641759	0.0240022	0.395957
ENSMUSG00000040728	Esrp1	epithelial splicing regulatory protein 1	114.268	205.518	0.558151	-0.841272	0.0242042	0.397686
ENSMUSG00000020656	Grhl1	grainyhead-like 1 (Drosophila)	6.5032	28.2102	0.256869	-1.96089	0.0243858	0.399469
ENSMUSG00000068015	Lrch1	leucine-rich repeats and calponin homology (CH) domain containing 1	493.532	828.857	0.595924	-0.746799	0.024531	0.400797
ENSMUSG00000022508	Bcl6	B cell leukemia/lymphoma 6	372.074	644.346	0.578099	-0.790613	0.0245132	0.400797
ENSMUSG00000018566	Slc2a4	solute carrier family 2 (facilitated glucose transporter), member 4	188.586	339.92	0.5561	-0.846584	0.0246086	0.401334
ENSMUSG00000030376	Slc8a2	solute carrier family 8 (sodium/calcium exchanger), member 2	6.8965	28.7677	0.26527	-1.91446	0.0246425	0.401334
ENSMUSG00000042807	Hecw2	HECT, C2 and WW domain containing E3 ubiquitin protein ligase 2	501.348	1078.54	0.465334	-1.10366	0.024794	0.401711
ENSMUSG00000022048	Dpysl2	dihydropyrimidinase-like 2	579.267	944.346	0.613814	-0.704125	0.0247512	0.401711
ENSMUSG00000079608	Stard6	StAR-related lipid transfer (START) domain containing 6	0	6.16441	0.139579	-2.84085	0.0248033	0.401711
ENSMUSG00000042985	Upk3b	uroplakin 3B	14.3168	36.6506	0.406814	-1.29756	0.0247725	0.401711
ENSMUSG00000034471	Caskin2	CASK-interacting protein 2	709.811	1156.31	0.614193	-0.703236	0.0249083	0.403092
ENSMUSG00000006930	Hap1	huntingtin-associated protein 1	54.7284	111.55	0.495145	-1.01408	0.0249309	0.403138
ENSMUSG00000022824	Muc13	mucin 13, epithelial transmembrane	0.603598	8.61667	0.166752	-2.58422	0.0250141	0.403526
ENSMUSG00000030000	Add2	adducin 2 (beta)	23.0729	57.6637	0.410354	-1.28506	0.0250064	0.403526
ENSMUSG00000031749	St3gal2	ST3 beta-galactoside alpha-2,3-sialyltransferase 2	291.602	471.617	0.619111	-0.69173	0.0250068	0.403526
ENSMUSG00000020653	Klf11	Kruppel-like factor 11	293.713	461.81	0.636791	-0.651107	0.0250533	0.403839
ENSMUSG00000036437	Npy1r	neuropeptide Y receptor Y1	8.25526	84.2708	0.10854	-3.20371	0.0250794	0.403941
ENSMUSG00000020092	Pald1	phosphatase domain containing, paladin 1	93.0691	201.081	0.465502	-1.10314	0.0251356	0.404044
ENSMUSG00000054204	Fam150b	family with sequence similarity 150, member B	0	6.10989	0.140649	-2.82983	0.0252045	0.404044
ENSMUSG00000022766	Serpind1	serine (or cysteine) peptidase inhibitor, clade D, member 1	12.4361	34.5549	0.377898	-1.40393	0.025149	0.404044
ENSMUSG00000034382	AI661453	expressed sequence AI661453	520.018	927.511	0.561133	-0.833586	0.0251912	0.404044
ENSMUSG00000071042	Rasgrp3	RAS, guanyl releasing protein 3	262.36	526.232	0.499515	-1.0014	0.0251361	0.404044
ENSMUSG00000020651	Slc26a4	solute carrier family 26, member 4	291.96	622.963	0.469515	-1.09076	0.0256352	0.407656
ENSMUSG00000022211	Carmil3	capping protein regulator and myosin 1 linker 3	24.5652	53.3879	0.470053	-1.08911	0.025641	0.407656
ENSMUSG00000054855	Rnd1	Rho family GTPase 1	60.7009	114.597	0.533758	-0.905741	0.0256087	0.407656
ENSMUSG00000000530	Acvrl1	activin A receptor, type II-like 1	354.175	591.403	0.599549	-0.73805	0.0255167	0.407656
ENSMUSG00000024430	Cabyr	calcium-binding tyrosine-(Y)-phosphorylation regulated (fibrousheathin 2)	10.8092	31.6312	0.361898	-1.46634	0.0255648	0.407656
ENSMUSG00000039813	Tbc1d2	TBC1 domain family, member 2	85.8015	162.104	0.532184	-0.910002	0.0256691	0.407656
ENSMUSG00000086316	2210013O21Rik	RIKEN cDNA 2210013O21 gene	36.0965	76.0656	0.481362	-1.05481	0.025557	0.407656
ENSMUSG00000055523	Gucy2g	guanylate cyclase 2g	1.32457	10.5758	0.200814	-2.31607	0.0257493	0.407782
ENSMUSG00000025083	Afap1l2	actin filament associated protein 1-like 2	294.57	537.762	0.548609	-0.86615	0.0257593	0.407782
ENSMUSG00000027864	Ptgfrn	prostaglandin F2 receptor negative regulator	113.877	193.774	0.589798	-0.761707	0.0257306	0.407782
ENSMUSG00000034037	Fgd5	FYVE, RhoGEF and PH domain containing 5	668.383	1534.13	0.436042	-1.19746	0.0257771	0.407782
ENSMUSG00000010154	Spire2	spire homolog 2 (Drosophila)	40.0125	88.1442	0.46007	-1.12008	0.0257338	0.407782
ENSMUSG00000050751	Pgbd5	piggyBac transposable element derived 5	2.72558	14.5256	0.239963	-2.05911	0.0258173	0.408101
ENSMUSG00000066258	Trim12a	tripartite motif-containing 12A	100.293	218.597	0.461269	-1.11632	0.0259975	0.410315
ENSMUSG00000090257	Gm4524	predicted gene 4524	84.4125	148.761	0.570326	-0.810142	0.0260192	0.41034
ENSMUSG00000021280	Exoc3l4	exocyst complex component 3-like 4	42.5355	125.616	0.343838	-1.5402	0.0261652	0.410884
ENSMUSG00000038781	Stap2	signal transducing adaptor family member 2	89.0032	155.093	0.576601	-0.794355	0.0261952	0.410884
ENSMUSG00000028977	Casz1	castor zinc finger 1	566.478	986.982	0.574381	-0.799919	0.0262147	0.410884
ENSMUSG00000030787	Lyve1	lymphatic vessel endothelial hyaluronan receptor 1	4.96494	24.7507	0.231642	-2.11003	0.0261838	0.410884
ENSMUSG00000031740	Mmp2	matrix metallopeptidase 2	57.355	133.055	0.435305	-1.1999	0.0261321	0.410884
ENSMUSG00000056569	Mpz	myelin protein zero	2.45872	12.2823	0.2604	-1.9412	0.0262705	0.411128
ENSMUSG00000002565	Scin	scinderin	883.572	1530.24	0.577682	-0.791652	0.0263857	0.411985
ENSMUSG00000075538	Gm10855	predicted gene 10855	0.387622	8.53746	0.145492	-2.78099	0.0264087	0.412028
ENSMUSG00000037185	Krt80	keratin 80	226.061	388.498	0.582957	-0.778539	0.0264745	0.412646
ENSMUSG00000067206	Lrrc66	leucine rich repeat containing 66	198.779	390.002	0.510942	-0.968768	0.0264887	0.412646
ENSMUSG00000019992	Mtfr2	mitochondrial fission regulator 2	6.93745	21.7715	0.34857	-1.52048	0.0265868	0.413858
ENSMUSG00000062319	Gm10115	predicted gene 10115	0	5.91875	0.144535	-2.79051	0.0266853	0.415075
ENSMUSG00000018899	Irf1	interferon regulatory factor 1	1411.64	2538.94	0.556171	-0.846399	0.0267252	0.41538
ENSMUSG00000022893	Adamts1	a disintegrin-like and metallopeptidase (reprolysin type) with thrombospondin type 1 motif, 1	1323.68	2293.55	0.577315	-0.79257	0.0267662	0.4157
ENSMUSG00000053490	Trim60	tripartite motif-containing 60	7.34047	24.4527	0.327685	-1.60962	0.0269288	0.41745
ENSMUSG00000049620	Prss33	protease, serine 33	0.892623	10.6441	0.162539	-2.62114	0.0269867	0.417854
ENSMUSG00000070871	Ccnyl1	cyclin Y-like 1	164.56	278.915	0.591463	-0.75764	0.0270255	0.417948
ENSMUSG00000055485	Soga1	suppressor of glucose, autophagy associated 1	585.823	929.041	0.630964	-0.664369	0.0270746	0.417948
ENSMUSG00000046733	Gprc5a	G protein-coupled receptor, family C, group 5, member A	72.3777	173.345	0.420876	-1.24853	0.0270706	0.417948
ENSMUSG00000032815	Fanca	Fanconi anemia, complementation group A	67.3424	118.484	0.571982	-0.80596	0.0270511	0.417948
ENSMUSG00000092051	Gm17229	predicted gene 17229	38.696	75.4	0.519581	-0.944579	0.0271494	0.418153
ENSMUSG00000032034	Kcnj5	potassium inwardly-rectifying channel, subfamily J, member 5	30.0669	76.849	0.399066	-1.3253	0.0271407	0.418153
ENSMUSG00000001946	Esam	endothelial cell-specific adhesion molecule	314.544	629.939	0.500118	-0.999661	0.0272143	0.418838
ENSMUSG00000046916	Myct1	myc target 1	54.4459	127.145	0.43268	-1.20863	0.0273548	0.419328
ENSMUSG00000040624	Plekhg1	pleckstrin homology domain containing, family G (with RhoGef domain) member 1	437.375	749.228	0.584322	-0.775165	0.0273599	0.419328
ENSMUSG00000053080	2700081O15Rik	RIKEN cDNA 2700081O15 gene	87.7443	156.411	0.563775	-0.826807	0.0273117	0.419328
ENSMUSG00000023224	Serping1	serine (or cysteine) peptidase inhibitor, clade G, member 1	150.698	390.331	0.387647	-1.36718	0.0273627	0.419328
ENSMUSG00000030605	Mfge8	milk fat globule-EGF factor 8 protein	392.375	674.814	0.582076	-0.78072	0.0273429	0.419328
ENSMUSG00000046167	Gldn	gliomedin	0	12.2336	0.0755651	-3.72614	0.0273694	0.419328
ENSMUSG00000030411	Nova2	neuro-oncological ventral antigen 2	77.3673	169.783	0.458871	-1.12384	0.0274008	0.419496
ENSMUSG00000039952	Dag1	dystroglycan 1	1830.97	2818.03	0.649859	-0.621802	0.0274361	0.419721
ENSMUSG00000082809	Gm14150	predicted gene 14150	7.84885	24.9905	0.340465	-1.55442	0.0275647	0.421373
ENSMUSG00000029061	Mmp23	matrix metallopeptidase 23	27.9246	58.9133	0.482774	-1.05058	0.0276627	0.422239
ENSMUSG00000025069	Gsto2	glutathione S-transferase omega 2	7.80114	26.2264	0.323258	-1.62924	0.0278062	0.424112
ENSMUSG00000024897	Apba1	amyloid beta (A4) precursor protein binding, family A, member 1	103.63	230.711	0.451553	-1.14703	0.0278902	0.425076
ENSMUSG00000024548	Setbp1	SET binding protein 1	775.533	1252.56	0.619464	-0.690908	0.0279819	0.425521
ENSMUSG00000054889	Dsp	desmoplakin	1472.8	2757.93	0.534191	-0.904571	0.0280639	0.426134
ENSMUSG00000055639	Dach1	dachshund 1 (Drosophila)	356.983	553.588	0.645493	-0.631526	0.0281262	0.426445
ENSMUSG00000031004	Mki67	antigen identified by monoclonal antibody Ki 67	334.943	805.277	0.41666	-1.26306	0.0281254	0.426445
ENSMUSG00000025008	Tctn3	tectonic family member 3	65.7704	123.752	0.535225	-0.901782	0.0281639	0.4267
ENSMUSG00000022723	Crybg3	beta-gamma crystallin domain containing 3	418.73	661.623	0.633437	-0.658727	0.0283553	0.428645
ENSMUSG00000052726	Kcnt2	potassium channel, subfamily T, member 2	14.4597	37.021	0.40661	-1.29828	0.0286713	0.432462
ENSMUSG00000035969	Rusc2	RUN and SH3 domain containing 2	286.536	506.016	0.567114	-0.818289	0.0288194	0.434302
ENSMUSG00000039270	Megf9	multiple EGF-like-domains 9	351.183	645.085	0.545104	-0.875397	0.0288358	0.434302
ENSMUSG00000040808	S100g	S100 calcium binding protein G	4469.67	10011.7	0.4465	-1.16327	0.0288929	0.434521
ENSMUSG00000022324	Matn2	matrilin 2	58.2792	150.61	0.390996	-1.35477	0.028965	0.434645
ENSMUSG00000020607	Fam84a	family with sequence similarity 84, member A	143.282	237.834	0.60411	-0.727117	0.0291987	0.434921
ENSMUSG00000014813	Stc1	stanniocalcin 1	77.9746	158.577	0.494898	-1.0148	0.029155	0.434921
ENSMUSG00000039693	Msantd3	Myb/SANT-like DNA-binding domain containing 3	29.8635	59.4623	0.510459	-0.970134	0.0291507	0.434921
ENSMUSG00000031558	Slit2	slit homolog 2 (Drosophila)	817.533	1515.84	0.53963	-0.889958	0.029158	0.434921
ENSMUSG00000085382	Gm13861	predicted gene 13861	1.2072	10.6045	0.190202	-2.39439	0.0291477	0.434921
ENSMUSG00000043251	Exoc3l	exocyst complex component 3-like	34.9218	69.2545	0.511309	-0.967733	0.0292176	0.434921
ENSMUSG00000036768	Kif15	kinesin family member 15	16.567	48.5288	0.354682	-1.4954	0.0290576	0.434921
ENSMUSG00000017765	Slc12a4	solute carrier family 12, member 4	176.223	306.552	0.576236	-0.795269	0.0292888	0.435663
ENSMUSG00000025352	Gdf11	growth differentiation factor 11	112.286	211.359	0.533461	-0.906544	0.0293232	0.435857
ENSMUSG00000029287	Tgfbr3	transforming growth factor, beta receptor III	641.475	981.754	0.65375	-0.613189	0.029433	0.43634
ENSMUSG00000030222	Rerg	RAS-like, estrogen-regulated, growth-inhibitor	8.38257	27.6408	0.327595	-1.61002	0.0294834	0.43634
ENSMUSG00000002266	Zim1	zinc finger, imprinted 1	1.24476	10.4707	0.195695	-2.35332	0.0294977	0.43634
ENSMUSG00000030621	Me3	malic enzyme 3, NADP(+)-dependent, mitochondrial	504.441	774.117	0.652084	-0.61687	0.029477	0.43634
ENSMUSG00000068263	Efcc1	EF hand and coiled-coil domain containing 1	8.18538	27.3813	0.323642	-1.62753	0.0296712	0.437221
ENSMUSG00000005836	Gata6	GATA binding protein 6	8.61078	32.6226	0.285843	-1.8067	0.0297007	0.437331
ENSMUSG00000054027	Nt5dc3	5'-nucleotidase domain containing 3	182.416	295.582	0.618434	-0.693308	0.0297991	0.438463
ENSMUSG00000010529	Gm266	predicted gene 266	0	7.97883	0.111373	-3.16653	0.0298975	0.439595
ENSMUSG00000022799	Arhgap31	Rho GTPase activating protein 31	953.679	1819.87	0.5243	-0.931536	0.0300033	0.440167
ENSMUSG00000027784	Ppm1l	protein phosphatase 1 (formerly 2C)-like	406.128	633.812	0.641336	-0.640847	0.0300276	0.440167
ENSMUSG00000038859	Baiap2l1	BAI1-associated protein 2-like 1	268.583	433.037	0.621106	-0.687088	0.0300256	0.440167
ENSMUSG00000062995	Ica1	islet cell autoantigen 1	98.8803	191.096	0.51995	-0.943556	0.0301595	0.440907
ENSMUSG00000019846	Lama4	laminin, alpha 4	111.276	192.843	0.579212	-0.787837	0.030277	0.441047
ENSMUSG00000000093	Tbx2	T-box 2	596.978	985.625	0.606084	-0.72241	0.030255	0.441047
ENSMUSG00000060260	Pwwp2b	PWWP domain containing 2B	69.8645	122.588	0.573394	-0.802402	0.030362	0.441655
ENSMUSG00000045318	Adra2c	adrenergic receptor, alpha 2c	4.67254	19.2836	0.279662	-1.83824	0.0304587	0.442728
ENSMUSG00000054598	9130230L23Rik	RIKEN cDNA 9130230L23 gene	19.9313	48.5943	0.422051	-1.24451	0.0304791	0.442728
ENSMUSG00000054951	9130008F23Rik	RIKEN cDNA 9130008F23 gene	18.7123	47.1146	0.409695	-1.28738	0.0306042	0.443072
ENSMUSG00000051855	Mest	mesoderm specific transcript	36.2086	114.282	0.322762	-1.63146	0.0306113	0.443072
ENSMUSG00000036867	Smad6	SMAD family member 6	192.365	375.649	0.513381	-0.961897	0.0305487	0.443072
ENSMUSG00000000531	Grasp	GRP1 (general receptor for phosphoinositides 1)-associated scaffold protein	215.29	508.528	0.424491	-1.23619	0.0306452	0.443249
ENSMUSG00000086591	Dnah2os	dynein, axonemal, heavy chain 2, opposite strand	0.99122	10.3588	0.175302	-2.51209	0.0308842	0.446073
ENSMUSG00000007107	Atp1a4	ATPase, Na+/K+ transporting, alpha 4 polypeptide	1.22936	9.26242	0.217235	-2.20267	0.0311286	0.448335
ENSMUSG00000021466	Ptch1	patched 1	442.539	724.244	0.611571	-0.709408	0.031196	0.448357
ENSMUSG00000026811	St6galnac6	ST6 (alpha-N-acetyl-neuraminyl-2,3-beta-galactosyl-1,3)-N-acetylgalactosaminide alpha-2,6-sialyltransferase 6	21.7778	48.1128	0.463786	-1.10847	0.0311612	0.448357
ENSMUSG00000034459	Ifit1	interferon-induced protein with tetratricopeptide repeats 1	129.156	252.377	0.513685	-0.961045	0.0312901	0.448648
ENSMUSG00000074358	Ccdc61	coiled-coil domain containing 61	93.5417	172.634	0.544489	-0.877026	0.0313041	0.448648
ENSMUSG00000020728	Cep112	centrosomal protein 112	103.651	174.867	0.595058	-0.748899	0.0313763	0.448738
ENSMUSG00000022212	Cpne6	copine VI	0.622381	8.58396	0.169281	-2.56251	0.0313758	0.448738
ENSMUSG00000034127	Tspan8	tetraspanin 8	248.682	500.677	0.497696	-1.00666	0.0314278	0.44916
ENSMUSG00000022912	Pros1	protein S (alpha)	263.184	415.07	0.634952	-0.655281	0.0314838	0.449331
ENSMUSG00000027777	Schip1	schwannomin interacting protein 1	188.669	319.614	0.591582	-0.757351	0.0314766	0.449331
ENSMUSG00000044033	Ccdc141	coiled-coil domain containing 141	980.022	1520.05	0.644965	-0.632706	0.0315676	0.449899
ENSMUSG00000042918	Mamstr	MEF2 activating motif and SAP domain containing transcriptional regulator	33.7503	110.693	0.311123	-1.68444	0.0315666	0.449899
ENSMUSG00000021359	Tfap2a	transcription factor AP-2, alpha	75.9504	139.358	0.548245	-0.867108	0.0316607	0.450398
ENSMUSG00000029436	Mmp17	matrix metallopeptidase 17	15.0787	52.5329	0.300352	-1.73527	0.0316317	0.450398
ENSMUSG00000038816	Ctnnal1	catenin (cadherin associated protein), alpha-like 1	347.939	534.606	0.651484	-0.618199	0.0316921	0.450416
ENSMUSG00000039959	Hip1	huntingtin interacting protein 1	767.525	1551.28	0.495093	-1.01423	0.0317592	0.451055
ENSMUSG00000070476	Fam217b	family with sequence similarity 217, member B	34.3514	73.829	0.472429	-1.08183	0.031985	0.453317
ENSMUSG00000002012	Pnck	pregnancy upregulated non-ubiquitously expressed CaM kinase	1.63915	10.3301	0.232933	-2.10201	0.0320763	0.453666
ENSMUSG00000022231	Sema5a	sema domain, seven thrombospondin repeats (type 1 and type 1-like), transmembrane domain (TM) and short cytoplasmic domain, (semaphorin) 5A	947.694	1419.1	0.668047	-0.581979	0.0322051	0.455173
ENSMUSG00000021708	Rasgrf2	RAS protein-specific guanine nucleotide-releasing factor 2	128.168	231.199	0.556279	-0.84612	0.0327099	0.46135
ENSMUSG00000085452	4930554G24Rik	RIKEN cDNA 4930554G24 gene	0	5.64149	0.150569	-2.73151	0.0328636	0.462815
ENSMUSG00000032855	Pkd1	polycystic kidney disease 1 homolog	954.895	1500.22	0.636745	-0.651213	0.0329635	0.463646
ENSMUSG00000058248	Kcnh1	potassium voltage-gated channel, subfamily H (eag-related), member 1	6.09571	21.2278	0.319227	-1.64735	0.0331459	0.463647
ENSMUSG00000087291	Gm11946	predicted gene 11946	25.8454	54.4298	0.484314	-1.04598	0.0331521	0.463647
ENSMUSG00000085913	Gm15601	predicted gene 15601	29.876	62.582	0.48561	-1.04213	0.0332332	0.463647
ENSMUSG00000052684	Jun	jun proto-oncogene	13050	19697.6	0.662536	-0.593929	0.0331219	0.463647
ENSMUSG00000028978	Nos3	nitric oxide synthase 3, endothelial cell	137.406	310.357	0.444524	-1.16967	0.0331086	0.463647
ENSMUSG00000092402	Gm20485	predicted gene 20485	0	5.61968	0.151065	-2.72676	0.0330796	0.463647
ENSMUSG00000085813	Gm15870	predicted gene 15870	0	5.61968	0.151065	-2.72676	0.0330796	0.463647
ENSMUSG00000049128	Ivl	involucrin	1.39762	15.8865	0.141984	-2.8162	0.0332918	0.464108
ENSMUSG00000060470	Adgrg3	adhesion G protein-coupled receptor G3	51.9012	131.124	0.400389	-1.32052	0.0333158	0.464126
ENSMUSG00000020992	4930512B01Rik	RIKEN cDNA 4930512B01 gene	65.3749	122.618	0.536934	-0.897184	0.0335683	0.465476
ENSMUSG00000044043	Pcdhb14	protocadherin beta 14	12.1612	33.0377	0.386665	-1.37084	0.0335193	0.465476
ENSMUSG00000063903	Klk1	kallikrein 1	10354.5	26597.2	0.389331	-1.36093	0.0335372	0.465476
ENSMUSG00000022894	Adamts5	a disintegrin-like and metallopeptidase (reprolysin type) with thrombospondin type 1 motif, 5 (aggrecanase-2)	154.535	351.395	0.441364	-1.17996	0.033718	0.465881
ENSMUSG00000001089	Luzp1	leucine zipper protein 1	1335.17	1978.72	0.674929	-0.567192	0.033709	0.465881
ENSMUSG00000084965	Gm13857	predicted gene 13857	0	5.55425	0.152573	-2.71243	0.0337398	0.465881
ENSMUSG00000045180	Shroom2	shroom family member 2	550.387	865.42	0.636397	-0.652002	0.0337546	0.465881
ENSMUSG00000009828	Ick	intestinal cell kinase	160.944	271.123	0.595112	-0.748767	0.0341318	0.47036
ENSMUSG00000020185	E2f7	E2F transcription factor 7	4.12867	24.7674	0.199037	-2.32889	0.0342552	0.471742
ENSMUSG00000038738	Shank1	SH3/ankyrin domain gene 1	42.8294	81.5763	0.530774	-0.913829	0.034426	0.473351
ENSMUSG00000051515	Fam181b	family with sequence similarity 181, member B	4.67254	18.5477	0.29019	-1.78493	0.0344415	0.473351
ENSMUSG00000080316	Spaca6	sperm acrosome associated 6	207.748	392.046	0.531104	-0.912934	0.0345027	0.473873
ENSMUSG00000052105	Mtcl1	microtubule crosslinking factor 1	247.501	405.789	0.610886	-0.711025	0.0345602	0.474344
ENSMUSG00000044574	5031434C07Rik	RIKEN cDNA 5031434C07 gene	66.667	170.039	0.395623	-1.3378	0.0347332	0.475758
ENSMUSG00000035678	Tnfsf9	tumor necrosis factor (ligand) superfamily, member 9	119.913	206.944	0.581471	-0.782221	0.0348068	0.476447
ENSMUSG00000019966	Kitl	kit ligand	421.372	690.167	0.611099	-0.710522	0.034887	0.476606
ENSMUSG00000024597	Slc12a2	solute carrier family 12, member 2	480.665	745.827	0.644949	-0.632743	0.0349499	0.476606
ENSMUSG00000074987	Wt1os	Wilms tumor 1 homolog, opposite strand	0.819574	8.5741	0.190052	-2.39554	0.0348575	0.476606
ENSMUSG00000047907	Tshz2	teashirt zinc finger family member 2	20.6251	46.1915	0.458241	-1.12582	0.0349931	0.476606
ENSMUSG00000036334	Igsf10	immunoglobulin superfamily, member 10	20.0831	110.433	0.189199	-2.40202	0.0349585	0.476606
ENSMUSG00000047250	Ptgs1	prostaglandin-endoperoxide synthase 1	188.417	297.371	0.634837	-0.655543	0.0350666	0.476808
ENSMUSG00000020900	Myh10	myosin, heavy polypeptide 10, non-muscle	1779.69	2647.91	0.672233	-0.572967	0.0354196	0.479374
ENSMUSG00000081165	Gm11783	predicted gene 11783	0	5.39583	0.156352	-2.67713	0.0354181	0.479374
ENSMUSG00000060548	Tnfrsf19	tumor necrosis factor receptor superfamily, member 19	9.18415	31.015	0.318105	-1.65242	0.0355099	0.47976
ENSMUSG00000015605	Srf	serum response factor	504.307	771.002	0.654541	-0.611446	0.035582	0.47976
ENSMUSG00000027931	Npr1	natriuretic peptide receptor 1	250.12	508.848	0.492539	-1.02169	0.0355257	0.47976
ENSMUSG00000029049	Morn1	MORN repeat containing 1	69.8396	123.441	0.569263	-0.812833	0.0356359	0.47976
ENSMUSG00000085708	Gm16063	predicted gene 16063	0	5.37402	0.156887	-2.6722	0.0356584	0.47976
ENSMUSG00000034911	Ushbp1	Usher syndrome 1C binding protein 1	234.116	483.332	0.485444	-1.04262	0.0357066	0.47976
ENSMUSG00000038578	Susd1	sushi domain containing 1	89.6328	156.866	0.574111	-0.800598	0.0357559	0.480053
ENSMUSG00000034485	Uaca	uveal autoantigen with coiled-coil domains and ankyrin repeats	1135.86	1764.4	0.64397	-0.634935	0.0357754	0.480053
ENSMUSG00000086330	1700007J10Rik	RIKEN cDNA 1700007J10 gene	14.5613	39.6378	0.382926	-1.38486	0.0361056	0.482582
ENSMUSG00000028270	Gbp2	guanylate binding protein 2	210.012	359.112	0.585961	-0.771125	0.0361802	0.482996
ENSMUSG00000030074	Gxylt2	glucoside xylosyltransferase 2	3.13199	15.1387	0.25603	-1.96561	0.0362064	0.482996
ENSMUSG00000005417	Mprip	myosin phosphatase Rho interacting protein	3159.14	4769.08	0.662491	-0.594026	0.0363357	0.483757
ENSMUSG00000054708	Ankrd24	ankyrin repeat domain 24	283.618	432.435	0.656658	-0.606786	0.0363886	0.483869
ENSMUSG00000035172	Plekhh3	pleckstrin homology domain containing, family H (with MyTH4 domain) member 3	68.5614	117.981	0.584641	-0.774378	0.0365099	0.483869
ENSMUSG00000050234	Gja4	gap junction protein, alpha 4	75.8354	178.264	0.428617	-1.22224	0.0365454	0.483869
ENSMUSG00000039539	Sgcz	sarcoglycan zeta	1.94696	11.6325	0.233283	-2.09985	0.0364396	0.483869
ENSMUSG00000048967	Yjefn3	YjeF N-terminal domain containing 3	3.18834	14.9257	0.262992	-1.92691	0.0365253	0.483869
ENSMUSG00000085582	3110099E03Rik	RIKEN cDNA 3110099E03 gene	18.1508	47.6066	0.393995	-1.34375	0.0365924	0.48402
ENSMUSG00000030699	Tbx6	T-box 6	28.7636	65.7949	0.445598	-1.16619	0.0366525	0.484501
ENSMUSG00000020439	Smtn	smoothelin	900.034	1377.75	0.653516	-0.613704	0.0368703	0.485941
ENSMUSG00000036770	Stpg3	sperm tail PG rich repeat containing 3	6.49327	23.1245	0.310609	-1.68683	0.036918	0.485941
ENSMUSG00000013419	Zfp651	zinc finger protein 651	151.256	246.673	0.614745	-0.70194	0.0368793	0.485941
ENSMUSG00000002324	Rec8	REC8 meiotic recombination protein	23.2907	103.393	0.232686	-2.10354	0.0370262	0.486508
ENSMUSG00000044819	Oxgr1	oxoglutarate (alpha-ketoglutarate) receptor 1	231.766	422.515	0.549605	-0.863534	0.0370899	0.486817
ENSMUSG00000032172	Olfm2	olfactomedin 2	22.1774	56.9258	0.400123	-1.32148	0.037147	0.487253
ENSMUSG00000001558	Klhl10	kelch-like 10	2.56387	15.215	0.219789	-2.18581	0.0372228	0.487906
ENSMUSG00000023809	Rps6ka2	ribosomal protein S6 kinase, polypeptide 2	73.3186	129.5	0.569492	-0.812253	0.0372445	0.487906
ENSMUSG00000042348	Arl15	ADP-ribosylation factor-like 15	234.065	381.133	0.615139	-0.701017	0.0374604	0.489848
ENSMUSG00000090698	Apold1	apolipoprotein L domain containing 1	317.103	638.502	0.497424	-1.00745	0.0374887	0.489848
ENSMUSG00000091387	Gcnt4	glucosaminyl (N-acetyl) transferase 4, core 2 (beta-1,6-N-acetylglucosaminyltransferase)	50.9066	96.8219	0.530624	-0.914238	0.0377308	0.492334
ENSMUSG00000023039	Krt7	keratin 7	958.985	1631.65	0.587994	-0.766128	0.0377513	0.492334
ENSMUSG00000040254	Sema3d	sema domain, immunoglobulin domain (Ig), short basic domain, secreted, (semaphorin) 3D	61.8298	112.962	0.551322	-0.859032	0.0377957	0.492598
ENSMUSG00000021219	Rgs6	regulator of G-protein signaling 6	79.6895	130.168	0.61516	-0.700966	0.037905	0.493394
ENSMUSG00000085069	Gm13111	predicted gene 13111	184.208	320.819	0.575502	-0.797107	0.0378968	0.493394
ENSMUSG00000019853	Hebp2	heme binding protein 2	10.2345	24.5664	0.439425	-1.18631	0.0382948	0.496723
ENSMUSG00000074480	Mex3a	mex3 RNA binding family member A	22.7946	49.4874	0.471297	-1.08529	0.0383068	0.496723
ENSMUSG00000022053	Ebf2	early B cell factor 2	0	7.35887	0.119633	-3.06331	0.0385128	0.498171
ENSMUSG00000029671	Wnt16	wingless-type MMTV integration site family, member 16	4.01467	15.6615	0.300973	-1.73229	0.038516	0.498171
ENSMUSG00000000957	Mmp14	matrix metallopeptidase 14 (membrane-inserted)	141.31	233.178	0.607701	-0.718567	0.0385436	0.498213
ENSMUSG00000047330	Kcne4	potassium voltage-gated channel, Isk-related subfamily, gene 4	5.66246	27.8507	0.230929	-2.11448	0.0387203	0.498508
ENSMUSG00000044667	Plppr4	phospholipid phosphatase related 4	40.1523	72.8793	0.55702	-0.844198	0.038675	0.498508
ENSMUSG00000030342	Cd9	CD9 antigen	295.922	473.99	0.625112	-0.677814	0.038735	0.498508
ENSMUSG00000037169	Mycn	v-myc avian myelocytomatosis viral related oncogene, neuroblastoma derived	40.1812	76.1417	0.533839	-0.905525	0.0388231	0.498983
ENSMUSG00000074415	2610203C20Rik	RIKEN cDNA 2610203C20 gene	8.83539	25.3856	0.372756	-1.4237	0.0390369	0.500471
ENSMUSG00000086837	Gm16618	predicted gene, 16618	4.97696	19.6104	0.289998	-1.78589	0.0391586	0.501087
ENSMUSG00000078670	Fam174b	family with sequence similarity 174, member B	134.517	224.563	0.600795	-0.735055	0.0391958	0.50125
ENSMUSG00000026235	Epha4	Eph receptor A4	146.068	230.078	0.63644	-0.651903	0.039254	0.501423
ENSMUSG00000053965	Pde5a	phosphodiesterase 5A, cGMP-specific	88.3655	158.907	0.558861	-0.83944	0.0392998	0.501423
ENSMUSG00000032718	Mansc1	MANSC domain containing 1	60.8036	134.032	0.457697	-1.12754	0.0395724	0.504172
ENSMUSG00000000385	Tmprss2	transmembrane protease, serine 2	1226.63	1825.13	0.67226	-0.572909	0.039705	0.505014
ENSMUSG00000034361	Cpne2	copine II	97.8742	163.369	0.601536	-0.733276	0.0396673	0.505014
ENSMUSG00000025776	Crispld1	cysteine-rich secretory protein LCCL domain containing 1	84.3949	147.025	0.576896	-0.793616	0.0398006	0.505502
ENSMUSG00000092210	A930009A15Rik	RIKEN cDNA A930009A15 gene	0.819574	7.65402	0.210258	-2.24977	0.0405721	0.507824
ENSMUSG00000020315	Sptbn1	spectrin beta, non-erythrocytic 1	17436.3	25399.7	0.686489	-0.542691	0.040605	0.507824
ENSMUSG00000079105	C7	complement component 7	53.1102	129.435	0.414845	-1.26936	0.0404925	0.507824
ENSMUSG00000024048	Myl12a	myosin, light chain 12A, regulatory, non-sarcomeric	750.09	1152.58	0.651093	-0.619065	0.0401534	0.507824
ENSMUSG00000074653	Lrrc31	leucine rich repeat containing 31	21.0013	49.0636	0.439466	-1.18618	0.0404002	0.507824
ENSMUSG00000027765	P2ry1	purinergic receptor P2Y, G-protein coupled 1	74.3204	127.022	0.588341	-0.765276	0.0405856	0.507824
ENSMUSG00000028718	Stil	Scl/Tal1 interrupting locus	1.78525	12.7031	0.203256	-2.29863	0.0401077	0.507824
ENSMUSG00000028859	Csf3r	colony stimulating factor 3 receptor (granulocyte)	110.531	198.342	0.559497	-0.837798	0.0403333	0.507824
ENSMUSG00000049649	Gpr3	G-protein coupled receptor 3	10.1015	27.4635	0.390027	-1.35835	0.040431	0.507824
ENSMUSG00000038456	Dennd2a	DENN/MADD domain containing 2A	28.6187	55.7185	0.522206	-0.937308	0.0402057	0.507824
ENSMUSG00000030353	Tead4	TEA domain family member 4	34.5355	69.0942	0.506967	-0.980035	0.0403727	0.507824
ENSMUSG00000040987	Mill2	MHC I like leukocyte 2	28.8848	61.3738	0.479125	-1.06153	0.0405906	0.507824
ENSMUSG00000031452	1700029H14Rik	RIKEN cDNA 1700029H14 gene	0.387622	8.13731	0.151863	-2.71915	0.0402187	0.507824
ENSMUSG00000032258	Lca5	Leber congenital amaurosis 5 (human)	47.2391	95.9829	0.497398	-1.00753	0.0402598	0.507824
ENSMUSG00000031377	Bmx	BMX non-receptor tyrosine kinase	14.5868	62.7803	0.244383	-2.03278	0.040218	0.507824
ENSMUSG00000087514	Gm16076	predicted gene 16076	20.4555	42.408	0.494276	-1.01661	0.0406831	0.508489
ENSMUSG00000001507	Itga3	integrin alpha 3	611.991	1033.24	0.592697	-0.754633	0.0407341	0.508504
ENSMUSG00000033083	Tbc1d4	TBC1 domain family, member 4	370.331	634.017	0.584758	-0.774087	0.0407827	0.5088
ENSMUSG00000041773	Enc1	ectodermal-neural cortex 1	177.445	294.528	0.603819	-0.727813	0.0409892	0.509086
ENSMUSG00000022433	Csnk1e	casein kinase 1, epsilon	244.344	392.458	0.623556	-0.681408	0.0410051	0.509086
ENSMUSG00000049044	Rapgef4	Rap guanine nucleotide exchange factor (GEF) 4	156.616	372.61	0.421875	-1.24511	0.0409645	0.509086
ENSMUSG00000039611	Tmem246	transmembrane protein 246	84.4268	144.009	0.589115	-0.76338	0.0408889	0.509086
ENSMUSG00000086061	Gm13075	predicted gene 13075	24.1436	45.6467	0.539022	-0.891583	0.0409437	0.509086
ENSMUSG00000020486	Sept4	septin 4	185.409	306.178	0.606843	-0.720606	0.0411272	0.509729
ENSMUSG00000007989	Fzd3	frizzled class receptor 3	37.1356	68.5828	0.548061	-0.867592	0.0411373	0.509729
ENSMUSG00000026308	Klhl30	kelch-like 30	4.30032	16.5232	0.302474	-1.72512	0.0412372	0.510417
ENSMUSG00000044807	Zfp354c	zinc finger protein 354C	47.8166	94.412	0.511641	-0.966797	0.0413222	0.510524
ENSMUSG00000062204	Olfr1373	olfactory receptor 1373	0.409787	7.15683	0.172835	-2.53253	0.0412957	0.510524
ENSMUSG00000001930	Vwf	Von Willebrand factor	95.3261	161.42	0.593069	-0.753728	0.0412998	0.510524
ENSMUSG00000062044	Lmtk3	lemur tyrosine kinase 3	31.8386	60.8021	0.531351	-0.912264	0.0413459	0.510524
ENSMUSG00000034949	Zfr2	zinc finger RNA binding protein 2	53.992	103.205	0.527727	-0.922137	0.0415725	0.512393
ENSMUSG00000023079	Gtf2ird1	general transcription factor II I repeat domain-containing 1	203.978	322.117	0.634377	-0.656587	0.0415623	0.512393
ENSMUSG00000021268	Meg3	maternally expressed 3	16.7411	86.4961	0.202765	-2.30212	0.0416761	0.51336
ENSMUSG00000031354	Amelx	amelogenin, X-linked	2.56049	15.3367	0.217944	-2.19797	0.0417736	0.513941
ENSMUSG00000041992	Rapgef5	Rap guanine nucleotide exchange factor (GEF) 5	208.343	379.588	0.550051	-0.862361	0.0420011	0.516118
ENSMUSG00000029223	Uchl1	ubiquitin carboxy-terminal hydrolase L1	30.1176	58.0715	0.526778	-0.924733	0.0421376	0.516863
ENSMUSG00000031292	Cdkl5	cyclin-dependent kinase-like 5	102.901	170.741	0.604988	-0.725022	0.0421978	0.517291
ENSMUSG00000049288	Lix1l	Lix1-like	57.0738	106.778	0.53883	-0.892098	0.0424874	0.520216
ENSMUSG00000021458	2010111I01Rik	RIKEN cDNA 2010111I01 gene	577.259	886.344	0.651674	-0.617777	0.0426786	0.521409
ENSMUSG00000028073	Pear1	platelet endothelial aggregation receptor 1	199.9	363.609	0.551002	-0.859871	0.042687	0.521409
ENSMUSG00000054162	Spock3	sparc/osteonectin, cwcv and kazal-like domains proteoglycan 3	17.3911	37.9887	0.471704	-1.08405	0.042675	0.521409
ENSMUSG00000024098	Twsg1	twisted gastrulation BMP signaling modulator 1	717.338	1192.02	0.602117	-0.731884	0.0427574	0.521787
ENSMUSG00000078706	Gm53	predicted gene 53	266.069	412.575	0.645757	-0.630937	0.0429925	0.522018
ENSMUSG00000037544	Dlgap5	discs, large (Drosophila) homolog-associated protein 5	16.0964	76.6081	0.220291	-2.18252	0.0429844	0.522018
ENSMUSG00000037003	Tns2	tensin 2	1726.74	2629.1	0.656912	-0.606228	0.0429494	0.522018
ENSMUSG00000024302	Dtna	dystrobrevin alpha	75.3559	126.178	0.600387	-0.736036	0.0429717	0.522018
ENSMUSG00000015850	Adamtsl4	ADAMTS-like 4	113.946	297.198	0.385468	-1.37532	0.0431637	0.522736
ENSMUSG00000001911	Nfix	nuclear factor I/X	726.262	1084.94	0.66971	-0.578393	0.0431661	0.522736
ENSMUSG00000038071	Npy6r	neuropeptide Y receptor Y6	19.8587	44.6611	0.456816	-1.13032	0.0432844	0.522755
ENSMUSG00000085696	Hoxaas3	Hoxa cluster antisense RNA 3	13.623	36.8022	0.38683	-1.37023	0.0433091	0.522755
ENSMUSG00000024843	Chka	choline kinase alpha	1916.04	3205.88	0.597791	-0.742288	0.0434105	0.523361
ENSMUSG00000063160	Numbl	numb-like	32.6544	67.731	0.489653	-1.03017	0.043446	0.523479
ENSMUSG00000020682	Mmp28	matrix metallopeptidase 28 (epilysin)	30.6859	66.2467	0.471189	-1.08562	0.0437097	0.52589
ENSMUSG00000044646	Zbtb7c	zinc finger and BTB domain containing 7C	40.5313	85.4163	0.480596	-1.0571	0.0437233	0.52589
ENSMUSG00000021313	Ryr2	ryanodine receptor 2, cardiac	47.8528	99.2248	0.487432	-1.03673	0.043799	0.526297
ENSMUSG00000050105	Grrp1	glycine/arginine rich protein 1	46.882	113.6	0.417819	-1.25905	0.0438087	0.526297
ENSMUSG00000001036	Epn2	epsin 2	369.964	558.587	0.662924	-0.593084	0.0438798	0.526408
ENSMUSG00000027196	Alkbh3os1	alkB homolog 3, opposite strand 1	6.26267	20.8187	0.332865	-1.58699	0.0439041	0.526408
ENSMUSG00000063171	Rps4l	ribosomal protein S4-like	44.6543	82.3638	0.547651	-0.868671	0.0438639	0.526408
ENSMUSG00000037552	Plekhg2	pleckstrin homology domain containing, family G (with RhoGef domain) member 2	381.344	724.115	0.527287	-0.923339	0.043921	0.526408
ENSMUSG00000079020	Slc45a4	solute carrier family 45, member 4	584.197	886.486	0.659388	-0.600801	0.0440425	0.527115
ENSMUSG00000074971	Fibin	fin bud initiation factor homolog (zebrafish)	2.2172	17.7017	0.172027	-2.5393	0.0440833	0.527115
ENSMUSG00000056468	5730596B20Rik	RIKEN cDNA 5730596B20 gene	23.3672	49.9135	0.478599	-1.06311	0.0441212	0.52726
ENSMUSG00000078117	Gm16485	predicted gene 16485	15.2402	35.5445	0.444395	-1.17008	0.0441952	0.527836
ENSMUSG00000034917	Tjp3	tight junction protein 3	133.559	223.709	0.598815	-0.739817	0.0442887	0.528265
ENSMUSG00000044026	Slc35g1	solute carrier family 35, member G1	153.459	313.123	0.491717	-1.0241	0.0443088	0.528265
ENSMUSG00000025856	Pdgfa	platelet derived growth factor, alpha	141.896	219.357	0.648478	-0.624871	0.0442827	0.528265
ENSMUSG00000048450	Msx1	msh homeobox 1	32.4375	59.5622	0.552119	-0.85695	0.0446295	0.530849
ENSMUSG00000049721	Gal3st1	galactose-3-O-sulfotransferase 1	101.051	167.457	0.605799	-0.723089	0.0447635	0.531302
ENSMUSG00000020140	Lgr5	leucine rich repeat containing G protein coupled receptor 5	29.2103	71.044	0.419332	-1.25384	0.0448116	0.531467
ENSMUSG00000086893	Gm11365	predicted gene 11365	6.24519	21.0367	0.328778	-1.60481	0.0449202	0.532447
ENSMUSG00000039699	Batf2	basic leucine zipper transcription factor, ATF-like 2	26.7341	59.6542	0.45725	-1.12894	0.0450487	0.532919
ENSMUSG00000035735	Dagla	diacylglycerol lipase, alpha	45.3556	86.8405	0.527725	-0.922142	0.0450644	0.532919
ENSMUSG00000050737	Ptges	prostaglandin E synthase	143.062	290.906	0.493523	-1.01881	0.0450301	0.532919
ENSMUSG00000085049	Parvaos	parvin, alpha, opposite strand	0.933571	8.55235	0.202418	-2.30459	0.0452739	0.534661
ENSMUSG00000062866	Phactr2	phosphatase and actin regulator 2	1044.07	1565.15	0.667285	-0.583625	0.045417	0.535229
ENSMUSG00000026018	Ica1l	islet cell autoantigen 1-like	64.4319	132.586	0.489811	-1.0297	0.0457201	0.538179
ENSMUSG00000044052	Ccr10	chemokine (C-C motif) receptor 10	11.4892	31.4323	0.385086	-1.37675	0.0458514	0.538894
ENSMUSG00000026785	Pkn3	protein kinase N3	46.5597	85.9717	0.546841	-0.870806	0.0458863	0.538894
ENSMUSG00000045328	Cenpe	centromere protein E	54.2733	126.715	0.432785	-1.20828	0.0458636	0.538894
ENSMUSG00000021745	Ptprg	protein tyrosine phosphatase, receptor type, G	1120.32	1626.39	0.689034	-0.537353	0.0459256	0.539046
ENSMUSG00000030303	Far2	fatty acyl CoA reductase 2	14.2467	38.0708	0.390233	-1.35759	0.0460791	0.539606
ENSMUSG00000032036	Kirrel3	kin of IRRE like 3 (Drosophila)	18.0632	46.9521	0.397547	-1.3308	0.0461055	0.539606
ENSMUSG00000086844	B230206H07Rik	RIKEN cDNA B230206H07 gene	17.2226	38.4256	0.462204	-1.1134	0.0461371	0.539666
ENSMUSG00000020422	Tns3	tensin 3	2006.43	3010.44	0.666602	-0.585103	0.0462806	0.540714
ENSMUSG00000085781	Gm15640	predicted gene 15640	13.9954	34.7977	0.418894	-1.25534	0.0463005	0.540714
ENSMUSG00000014599	Csf1	colony stimulating factor 1 (macrophage)	256.753	464.788	0.55337	-0.853683	0.0463061	0.540714
ENSMUSG00000047819	Tigd4	tigger transposable element derived 4	0	14.0223	0.0665677	-3.90903	0.0463927	0.541096
ENSMUSG00000068876	Cgn	cingulin	296.112	460.778	0.643409	-0.636193	0.0467939	0.543613
ENSMUSG00000038594	Cep85l	centrosomal protein 85-like	163.673	266.874	0.614741	-0.70195	0.0471104	0.546048
ENSMUSG00000029381	Shroom3	shroom family member 3	934.13	1431.63	0.652738	-0.615423	0.0470592	0.546048
ENSMUSG00000020297	Nsg2	neuron specific gene family member 2	25.3825	55.7499	0.46489	-1.10504	0.0475522	0.548838
ENSMUSG00000012443	Kif11	kinesin family member 11	32.4662	70.2615	0.469625	-1.09042	0.0476429	0.549103
ENSMUSG00000020826	Nos2	nitric oxide synthase 2, inducible	7.29952	29.359	0.273379	-1.87102	0.0477995	0.550474
ENSMUSG00000051728	4930563D23Rik	RIKEN cDNA 4930563D23 gene	7.96961	22.2995	0.38497	-1.37718	0.0478157	0.550474
ENSMUSG00000003228	Grk5	G protein-coupled receptor kinase 5	160.341	259.779	0.618687	-0.692718	0.0479733	0.551666
ENSMUSG00000031760	Mt3	metallothionein 3	1.22598	9.27332	0.216676	-2.20639	0.0479644	0.551666
ENSMUSG00000046442	Ppm1e	protein phosphatase 1E (PP2C domain containing)	38.7555	86.9392	0.45208	-1.14535	0.0481545	0.551732
ENSMUSG00000038486	Sv2a	synaptic vesicle glycoprotein 2 a	189.235	347.261	0.546242	-0.872388	0.0481626	0.551732
ENSMUSG00000086565	Gm13133	predicted gene 13133	2.37006	13.8006	0.227698	-2.13481	0.0480651	0.551732
ENSMUSG00000043857	Mgat5b	mannoside acetylglucosaminyltransferase 5, isoenzyme B	0	5.20176	0.161245	-2.63268	0.0483046	0.552214
ENSMUSG00000027523	Gnas	GNAS (guanine nucleotide binding protein, alpha stimulating) complex locus	638.626	987.007	0.64739	-0.627293	0.0483184	0.552214
ENSMUSG00000044951	Mylk4	myosin light chain kinase family, member 4	0.819574	7.31133	0.218927	-2.19148	0.0484238	0.5528
ENSMUSG00000019779	Frk	fyn-related kinase	231.256	378.731	0.611634	-0.709261	0.0485507	0.553057
ENSMUSG00000024074	Crim1	cysteine rich transmembrane BMP regulator 1 (chordin like)	1329.96	1970.81	0.674994	-0.567054	0.048492	0.553057
ENSMUSG00000029687	Ezh2	enhancer of zeste 2 polycomb repressive complex 2 subunit	124.597	211.328	0.591523	-0.757494	0.0485546	0.553057
ENSMUSG00000022607	Ptk2	PTK2 protein tyrosine kinase 2	769.567	1144.63	0.672616	-0.572146	0.0486273	0.553268
ENSMUSG00000022505	Emp2	epithelial membrane protein 2	97.4157	194.25	0.50405	-0.988362	0.0487468	0.55401
ENSMUSG00000084421	Gm25107	predicted gene, 25107	2.21382	13.0607	0.228567	-2.12931	0.0489566	0.555468
ENSMUSG00000087774	Gm22320	predicted gene, 22320	0	5.13633	0.162964	-2.61738	0.049233	0.556747
ENSMUSG00000027474	Ccm2l	cerebral cavernous malformation 2-like	60.6436	180.408	0.339806	-1.55722	0.0492252	0.556747
ENSMUSG00000061462	Obscn	obscurin, cytoskeletal calmodulin and titin-interacting RhoGEF	22.0637	45.5803	0.495138	-1.0141	0.0495002	0.557607
ENSMUSG00000019027	Dnah1	dynein, axonemal, heavy chain 1	9.8955	28.7401	0.366357	-1.44868	0.049477	0.557607
ENSMUSG00000028041	Adam15	a disintegrin and metallopeptidase domain 15 (metargidin)	425.663	648.081	0.657334	-0.605301	0.0494272	0.557607
ENSMUSG00000035967	Ints6l	integrator complex subunit 6 like	369.363	584.497	0.632562	-0.660721	0.0496336	0.558494
ENSMUSG00000033684	Qsox1	quiescin Q6 sulfhydryl oxidase 1	193.455	299.671	0.646738	-0.628747	0.0496952	0.55888
ENSMUSG00000022885	St6gal1	beta galactoside alpha 2,6 sialyltransferase 1	255.919	400.115	0.640512	-0.642702	0.0497863	0.559596
ENSMUSG00000069171	Nr2f1	nuclear receptor subfamily 2, group F, member 1	13.9125	31.5718	0.457833	-1.12711	0.0500186	0.56128
ENSMUSG00000085839	Gm15949	predicted gene 15949	4.50745	18.0208	0.289548	-1.78813	0.0499992	0.56128
ENSMUSG00000020642	Rnf144a	ring finger protein 144A	156.042	281.652	0.5556	-0.847881	0.0500756	0.561611
ENSMUSG00000083993	Gm14398	predicted gene 14398	0.387622	7.72925	0.158962	-2.65324	0.0503391	0.563947
ENSMUSG00000081805	Gm14335	predicted gene 14335	8.83648	27.2752	0.347883	-1.52332	0.0505965	0.565899
ENSMUSG00000034463	Scara3	scavenger receptor class A, member 3	10.1412	26.2344	0.409085	-1.28953	0.0509055	0.567184
ENSMUSG00000003847	Nfat5	nuclear factor of activated T cells 5	3304.96	4835.17	0.68359	-0.548798	0.0508432	0.567184
ENSMUSG00000043782	Ccdc64b	coiled-coil domain containing 64B	29.2878	58.4904	0.509122	-0.973918	0.0510853	0.568874
ENSMUSG00000049336	Tenm2	teneurin transmembrane protein 2	32.6864	68.9959	0.481262	-1.0551	0.05123	0.569088
ENSMUSG00000039396	Neil3	nei like 3 (E. coli)	1.03217	8.40079	0.21617	-2.20976	0.0512438	0.569088
ENSMUSG00000031910	Has3	hyaluronan synthase 3	88.6076	153.118	0.581423	-0.782339	0.0511888	0.569088
ENSMUSG00000002845	Tmem39a	transmembrane protein 39a	137.993	220.692	0.626963	-0.673547	0.0515085	0.570477
ENSMUSG00000024909	Efemp2	epidermal growth factor-containing fibulin-like extracellular matrix protein 2	49.4543	84.396	0.590828	-0.75919	0.0516187	0.571077
ENSMUSG00000038086	Hspb2	heat shock protein 2	4.74559	17.1581	0.31642	-1.66009	0.05165	0.571114
ENSMUSG00000034472	Rasd2	RASD family, member 2	37.1734	80.1691	0.470294	-1.08836	0.0517108	0.571168
ENSMUSG00000041064	Pif1	PIF1 5'-to-3' DNA helicase	0.581433	8.23838	0.171181	-2.54641	0.0517032	0.571168
ENSMUSG00000025383	Il23a	interleukin 23, alpha subunit p19	0.193811	6.27235	0.164158	-2.60685	0.051888	0.572197
ENSMUSG00000091462	Gm17084	predicted gene 17084	14.4165	54.6751	0.2769	-1.85256	0.0518743	0.572197
ENSMUSG00000065475	Mir27b	microRNA 27b	10.9266	25.862	0.443994	-1.17139	0.0518647	0.572197
ENSMUSG00000006219	Fblim1	filamin binding LIM protein 1	56.0152	98.9255	0.570577	-0.809506	0.052035	0.573199
ENSMUSG00000020904	Cfap52	cilia and flagella associated protein 52	18.8367	44.2264	0.438608	-1.189	0.052351	0.574323
ENSMUSG00000017692	Rhbdl3	rhomboid, veinlet-like 3 (Drosophila)	23.2312	46.6093	0.508959	-0.974378	0.0523633	0.574323
ENSMUSG00000038615	Nfe2l1	nuclear factor, erythroid derived 2,-like 1	2778.57	4422.83	0.628318	-0.670434	0.0522202	0.574323
ENSMUSG00000040003	Magi2	membrane associated guanylate kinase, WW and PDZ domain containing 2	260.608	416.9	0.626006	-0.675751	0.0523067	0.574323
ENSMUSG00000026335	Pam	peptidylglycine alpha-amidating monooxygenase	1692.16	2494.33	0.678529	-0.559517	0.0526044	0.575443
ENSMUSG00000026380	Tfcp2l1	transcription factor CP2-like 1	5606.08	8038.02	0.697483	-0.51977	0.0534262	0.580694
ENSMUSG00000049872	Fam26e	family with sequence similarity 26, member E	1.93811	14.4452	0.190227	-2.3942	0.0533517	0.580694
ENSMUSG00000030054	Gp9	glycoprotein 9 (platelet)	2.36668	14.1135	0.22276	-2.16644	0.0533641	0.580694
ENSMUSG00000048442	Smim5	small integral membrane protein 5	114.573	175.443	0.655015	-0.610401	0.0535143	0.581032
ENSMUSG00000046223	Plaur	plasminogen activator, urokinase receptor	139.392	267.757	0.522377	-0.936836	0.0535119	0.581032
ENSMUSG00000082527	Gm8200	predicted gene 8200	0	4.84418	0.17111	-2.547	0.0537184	0.582011
ENSMUSG00000045039	Megf8	multiple EGF-like-domains 8	581.515	845.586	0.688076	-0.53936	0.0539011	0.583371
ENSMUSG00000087480	Gm15910	predicted gene 15910	16.7875	58.7668	0.297615	-1.74848	0.0539831	0.58364
ENSMUSG00000042961	Egflam	EGF-like, fibronectin type III and laminin G domains	33.5039	83.1477	0.410039	-1.28617	0.054037	0.58373
ENSMUSG00000054909	Wbscr25	Williams Beuren syndrome chromosome region 25 (human)	0	4.82237	0.171751	-2.54161	0.0540771	0.58373
ENSMUSG00000080763	Gm12341	predicted gene 12341	2.31579	12.2754	0.24977	-2.00133	0.0541866	0.584308
ENSMUSG00000045775	Slc16a5	solute carrier family 16 (monocarboxylic acid transporters), member 5	188.874	360.128	0.525781	-0.927467	0.0542029	0.584308
ENSMUSG00000036611	Eepd1	endonuclease/exonuclease/phosphatase family domain containing 1	38.7104	74.6365	0.525017	-0.929564	0.0542165	0.584308
ENSMUSG00000027580	Helz2	helicase with zinc finger 2, transcriptional coactivator	1196.69	2153.12	0.556002	-0.846839	0.0545769	0.587263
ENSMUSG00000033669	Zfp7	zinc finger protein 7	278.493	414.725	0.672302	-0.57282	0.0546863	0.58813
ENSMUSG00000028434	Epb41l4b	erythrocyte membrane protein band 4.1 like 4b	143.978	261.7	0.551879	-0.857576	0.0549333	0.59007
ENSMUSG00000050447	Lypd6	LY6/PLAUR domain containing 6	36.8907	91.0651	0.411564	-1.28081	0.0551441	0.590666
ENSMUSG00000020427	Igfbp3	insulin-like growth factor binding protein 3	751.154	1256.26	0.598248	-0.741183	0.0554503	0.591307
ENSMUSG00000042331	Specc1	sperm antigen with calponin homology and coiled-coil domains 1	958.963	1439.63	0.666349	-0.585651	0.0555571	0.591307
ENSMUSG00000022012	Enox1	ecto-NOX disulfide-thiol exchanger 1	58.3883	96.7815	0.607357	-0.719382	0.0556187	0.591307
ENSMUSG00000063704	Mapk15	mitogen-activated protein kinase 15	97.8409	168.937	0.581632	-0.781822	0.0553303	0.591307
ENSMUSG00000082152	Gm13655	predicted gene 13655	42.3429	71.6068	0.596953	-0.744311	0.0555303	0.591307
ENSMUSG00000028451	1700022I11Rik	RIKEN cDNA 1700022I11 gene	4.3204	19.4519	0.260141	-1.94263	0.05545	0.591307
ENSMUSG00000050677	Ccdc96	coiled-coil domain containing 96	32.5823	61.4689	0.537585	-0.895436	0.0554746	0.591307
ENSMUSG00000002910	Arrdc2	arrestin domain containing 2	187.486	287.768	0.652725	-0.615452	0.0553643	0.591307
ENSMUSG00000037129	Tmprss13	transmembrane protease, serine 13	0.409787	6.31995	0.192595	-2.37636	0.0555206	0.591307
ENSMUSG00000038264	Sema7a	sema domain, immunoglobulin domain (Ig), and GPI membrane anchor, (semaphorin) 7A	195.127	415.332	0.471083	-1.08595	0.0555018	0.591307
ENSMUSG00000031391	L1cam	L1 cell adhesion molecule	666.445	1200.37	0.55557	-0.847958	0.0553202	0.591307
ENSMUSG00000018378	Cuedc1	CUE domain containing 1	276.997	435.143	0.637398	-0.649733	0.0556542	0.591376
ENSMUSG00000061751	Kalrn	kalirin, RhoGEF kinase	874.528	1460.04	0.599249	-0.738773	0.0557413	0.591859
ENSMUSG00000084846	A730011C13Rik	RIKEN cDNA A730011C13 gene	25.3306	57.8129	0.447701	-1.15939	0.0557575	0.591859
ENSMUSG00000032028	Nxpe2	neurexophilin and PC-esterase domain family, member 2	14.0918	39.4048	0.373513	-1.42077	0.0558454	0.592483
ENSMUSG00000049362	Olfr173	olfactory receptor 173	0	4.71045	0.175118	-2.5136	0.055975	0.592627
ENSMUSG00000070999	Ccin	calicin	0	4.71045	0.175118	-2.5136	0.055975	0.592627
ENSMUSG00000048574	Gm5593	predicted gene 5593	0	4.71045	0.175118	-2.5136	0.055975	0.592627
ENSMUSG00000038811	Gngt2	guanine nucleotide binding protein (G protein), gamma transducing activity polypeptide 2	92.1497	159.965	0.578694	-0.789127	0.0561017	0.593661
ENSMUSG00000034164	Emid1	EMI domain containing 1	28.4059	55.645	0.519127	-0.945842	0.0561655	0.594028
ENSMUSG00000059772	Slx1b	SLX1 structure-specific endonuclease subunit homolog B (S. cerevisiae)	54.8109	94.6886	0.583255	-0.777801	0.0564084	0.595364
ENSMUSG00000025038	Efhc2	EF-hand domain (C-terminal) containing 2	8.65641	21.6784	0.425797	-1.23176	0.0563839	0.595364
ENSMUSG00000040569	Slc26a7	solute carrier family 26, member 7	20.5451	52.0635	0.406024	-1.30036	0.0564838	0.595582
ENSMUSG00000052539	Magi3	membrane associated guanylate kinase, WW and PDZ domain containing 3	725.481	1067.04	0.680201	-0.555968	0.0565407	0.595837
ENSMUSG00000019699	Akt3	thymoma viral proto-oncogene 3	336.092	560.371	0.60048	-0.735813	0.056764	0.596935
ENSMUSG00000085281	Gm13316	predicted gene 13316	0	5.0967	0.164023	-2.60803	0.0568196	0.596935
ENSMUSG00000031586	Rbpms	RNA binding protein gene with multiple splicing	620.079	900.567	0.688889	-0.537658	0.0568496	0.596935
ENSMUSG00000091071	1700030C10Rik	RIKEN cDNA 1700030C10 gene	1.47406	11.59	0.196509	-2.34733	0.0571511	0.599631
ENSMUSG00000067377	Tspan6	tetraspanin 6	14.4052	34.5668	0.433135	-1.20711	0.057165	0.599631
ENSMUSG00000064837	Snora75	small nucleolar RNA, H/ACA box 75	3.78985	15.6289	0.288043	-1.79564	0.0572738	0.599754
ENSMUSG00000035184	Fam124a	family with sequence similarity 124, member A	82.0543	128.937	0.639187	-0.64569	0.0574862	0.599754
ENSMUSG00000024736	Tmem132a	transmembrane protein 132A	113.378	180.03	0.631816	-0.662424	0.0574889	0.599754
ENSMUSG00000065604	Mir29b-1	microRNA 29b-1	0.797409	8.69692	0.185359	-2.43161	0.0572657	0.599754
ENSMUSG00000004902	Slc25a18	solute carrier family 25 (mitochondrial carrier), member 18	36.6762	75.6051	0.491824	-1.02379	0.0574818	0.599754
ENSMUSG00000034751	Mast4	microtubule associated serine/threonine kinase family member 4	955.176	1444.54	0.661468	-0.596257	0.0577657	0.600687
ENSMUSG00000023912	Slc25a27	solute carrier family 25, member 27	33.5457	64.1786	0.530016	-0.915891	0.0578033	0.600772
ENSMUSG00000065611	Mir23a	microRNA 23a	4.9715	19.3658	0.293213	-1.76998	0.0578469	0.600919
ENSMUSG00000089273	Gm24550	predicted gene, 24550	0	5.01749	0.166182	-2.58916	0.0580953	0.602145
ENSMUSG00000078528	Gm17068	predicted gene 17068	13.6178	32.1739	0.44064	-1.18233	0.0582478	0.602327
ENSMUSG00000031099	Smarca1	SWI/SNF related, matrix associated, actin dependent regulator of chromatin, subfamily a, member 1	17.0345	37.6828	0.466215	-1.10093	0.0582969	0.602529
ENSMUSG00000020897	Aurkb	aurora kinase B	3.46196	14.4097	0.289555	-1.78809	0.0589472	0.603791
ENSMUSG00000042826	Fgf11	fibroblast growth factor 11	35.8535	67.5737	0.537428	-0.895855	0.0586755	0.603791
ENSMUSG00000000753	Serpinf1	serine (or cysteine) peptidase inhibitor, clade F, member 1	73.342	142.445	0.518263	-0.948244	0.0589008	0.603791
ENSMUSG00000044548	Dact1	dishevelled-binding antagonist of beta-catenin 1	19.0742	42.1407	0.465319	-1.10371	0.0587491	0.603791
ENSMUSG00000046159	Chrm3	cholinergic receptor, muscarinic 3, cardiac	22.8588	53.3847	0.438704	-1.18868	0.058862	0.603791
ENSMUSG00000024913	Lrp5	low density lipoprotein receptor-related protein 5	689.664	1008.3	0.684301	-0.547297	0.0589397	0.603791
ENSMUSG00000042613	Pbxip1	pre B cell leukemia transcription factor interacting protein 1	1321.89	1875.72	0.704895	-0.504519	0.0589662	0.603791
ENSMUSG00000087516	Tbx3os1	T-box 3, opposite strand 1	1.55049	11.8415	0.198613	-2.33197	0.0588414	0.603791
ENSMUSG00000036687	Tmem184a	transmembrane protein 184a	259.517	380.142	0.683517	-0.548952	0.0589557	0.603791
ENSMUSG00000030717	Nupr1	nuclear protein transcription regulator 1	178.672	341.63	0.524391	-0.931284	0.0586498	0.603791
ENSMUSG00000029228	Lnx1	ligand of numb-protein X 1	147.861	225.647	0.656799	-0.606475	0.0590733	0.604075
ENSMUSG00000033717	Adra2a	adrenergic receptor, alpha 2a	10.8943	27.4704	0.417777	-1.25919	0.0594525	0.607099
ENSMUSG00000013275	Slc41a1	solute carrier family 41, member 1	367.751	558.707	0.658828	-0.602026	0.0596082	0.607778
ENSMUSG00000046417	Lrrc75a	leucine rich repeat containing 75A	24.6117	51.9358	0.483826	-1.04744	0.0596974	0.60808
ENSMUSG00000085517	Gm12963	predicted gene 12963	0.193811	6.17531	0.166378	-2.58747	0.0598201	0.60846
ENSMUSG00000026574	Dpt	dermatopontin	13.7049	59.3126	0.243812	-2.03616	0.0600627	0.609067
ENSMUSG00000023008	Fmnl3	formin-like 3	530.155	845.604	0.627395	-0.672554	0.0600326	0.609067
ENSMUSG00000000416	Cttnbp2	cortactin binding protein 2	439.342	669.127	0.657103	-0.60581	0.0600263	0.609067
ENSMUSG00000022101	Fgf17	fibroblast growth factor 17	0	4.89466	0.169645	-2.55941	0.0601611	0.609416
ENSMUSG00000043336	Filip1l	filamin A interacting protein 1-like	701.222	1528.47	0.459127	-1.12303	0.0601866	0.609416
ENSMUSG00000007039	Ddah2	dimethylarginine dimethylaminohydrolase 2	116.915	201.802	0.581428	-0.782326	0.0606207	0.611688
ENSMUSG00000039405	Prss23	protease, serine 23	258.739	391.686	0.661442	-0.596314	0.0605933	0.611688
ENSMUSG00000029231	Pdgfra	platelet derived growth factor receptor, alpha polypeptide	119.744	272.386	0.441662	-1.17898	0.0608811	0.613104
ENSMUSG00000029417	Cxcl9	chemokine (C-X-C motif) ligand 9	37.4973	90.6719	0.419946	-1.25172	0.0608601	0.613104
ENSMUSG00000021319	Sfrp4	secreted frizzled-related protein 4	28.6227	84.834	0.345116	-1.53485	0.0609595	0.613288
ENSMUSG00000042761	Mrap2	melanocortin 2 receptor accessory protein 2	5.17754	17.1443	0.340468	-1.55441	0.060952	0.613288
ENSMUSG00000057074	Ces1g	carboxylesterase 1G	37.4087	73.4095	0.51618	-0.954053	0.061132	0.614722
ENSMUSG00000024613	Tcof1	treacle ribosome biogenesis factor 1	805.726	1235.85	0.652244	-0.616516	0.0612154	0.615066
ENSMUSG00000092470	Gm20518	predicted gene 20518	32.8531	72.1062	0.463067	-1.11071	0.0613459	0.61566
ENSMUSG00000051067	Lingo3	leucine rich repeat and Ig domain containing 3	2.2493	13.2628	0.227817	-2.13406	0.061718	0.615831
ENSMUSG00000020889	Nr1d1	nuclear receptor subfamily 1, group D, member 1	1163.91	1755.37	0.663247	-0.592381	0.061762	0.615831
ENSMUSG00000071414	Gm6736	predicted gene 6736	23.7402	48.2028	0.50282	-0.991885	0.0617803	0.615831
ENSMUSG00000079018	Ly6c1	lymphocyte antigen 6 complex, locus C1	311.362	583.377	0.534522	-0.903678	0.0616592	0.615831
ENSMUSG00000057346	Apol9a	apolipoprotein L 9a	11.261	32.6802	0.364042	-1.45782	0.0618152	0.615831
ENSMUSG00000050520	Cldn8	claudin 8	453.063	827.905	0.547787	-0.868313	0.0615222	0.615831
ENSMUSG00000053164	Gpr21	G protein-coupled receptor 21	19.7587	47.7127	0.426145	-1.23058	0.0616334	0.615831
ENSMUSG00000027966	Col11a1	collagen, type XI, alpha 1	4.29823	24.6724	0.206379	-2.27664	0.0615128	0.615831
ENSMUSG00000003352	Cacnb3	calcium channel, voltage-dependent, beta 3 subunit	82.1315	151.84	0.543912	-0.878555	0.0620851	0.616283
ENSMUSG00000029001	Fbxo44	F-box protein 44	115.88	184.76	0.629201	-0.668407	0.0620549	0.616283
ENSMUSG00000029769	Ccdc136	coiled-coil domain containing 136	70.3964	125.686	0.56357	-0.827335	0.0621021	0.616283
ENSMUSG00000032908	Sgpp2	sphingosine-1-phosphate phosphotase 2	264.526	473.414	0.559693	-0.837293	0.0622599	0.616593
ENSMUSG00000081259	Gm6893	predicted gene 6893	0	4.77183	0.173255	-2.52903	0.0623403	0.616593
ENSMUSG00000052951	C130021I20Rik	Riken cDNA C130021I20 gene	0.387622	6.94683	0.174613	-2.51776	0.0623216	0.616593
ENSMUSG00000070720	Tmem200b	transmembrane protein 200B	16.8608	34.8976	0.497547	-1.00709	0.0622104	0.616593
ENSMUSG00000037738	Nek5	NIMA (never in mitosis gene a)-related expressed kinase 5	3.90723	15.7259	0.293391	-1.7691	0.0622157	0.616593
ENSMUSG00000069372	Ctxn3	cortexin 3	2.45872	9.9369	0.316243	-1.66089	0.0625533	0.617162
ENSMUSG00000011958	Bnip2	BCL2/adenovirus E1B interacting protein 2	484.227	722.021	0.671111	-0.575377	0.0624778	0.617162
ENSMUSG00000020886	Dlg4	discs, large homolog 4 (Drosophila)	86.1649	146.83	0.589631	-0.762117	0.0626654	0.617184
ENSMUSG00000092200	Tnxa	tenascin XA (pseudogene)	0.31119	5.83954	0.191707	-2.38302	0.0626706	0.617184
ENSMUSG00000025784	Clec3b	C-type lectin domain family 3, member b	18.7551	96.1357	0.203377	-2.29777	0.0626542	0.617184
ENSMUSG00000024968	Rcor2	REST corepressor 2	19.0214	40.2875	0.484926	-1.04416	0.0629815	0.618984
ENSMUSG00000042846	Lrrtm3	leucine rich repeat transmembrane neuronal 3	11.2547	29.4255	0.402776	-1.31195	0.063069	0.619258
ENSMUSG00000034295	Fhod3	formin homology 2 domain containing 3	877.895	1239.93	0.708254	-0.497661	0.063315	0.619292
ENSMUSG00000082375	Gm14141	predicted gene 14141	0.387622	6.85671	0.176616	-2.50131	0.063293	0.619292
ENSMUSG00000032479	Map4	microtubule-associated protein 4	1446.88	2059.27	0.70276	-0.508896	0.063142	0.619292
ENSMUSG00000017491	Rarb	retinoic acid receptor, beta	89.937	143.674	0.628563	-0.669871	0.0634313	0.619357
ENSMUSG00000057440	Mpp7	membrane protein, palmitoylated 7 (MAGUK p55 subfamily member 7)	204.005	315.599	0.647523	-0.626997	0.0634734	0.619357
ENSMUSG00000051048	P4ha3	procollagen-proline, 2-oxoglutarate 4-dioxygenase (proline 4-hydroxylase), alpha polypeptide III	0	4.71443	0.174996	-2.51461	0.0634	0.619357
ENSMUSG00000034311	Kif4	kinesin family member 4	10.233	25.4866	0.424103	-1.23751	0.0635718	0.619357
ENSMUSG00000036923	Stox1	storkhead box 1	10.1083	24.8735	0.429332	-1.21983	0.0644499	0.619417
ENSMUSG00000000320	Alox12	arachidonate 12-lipoxygenase	69.3666	119.887	0.582086	-0.780697	0.0641912	0.619417
ENSMUSG00000017390	Aldoc	aldolase C, fructose-bisphosphate	87.3748	160.081	0.548636	-0.866078	0.0644328	0.619417
ENSMUSG00000060981	Hist1h4h	histone cluster 1, H4h	175.889	290.055	0.607753	-0.718442	0.0640418	0.619417
ENSMUSG00000060429	Sntb1	syntrophin, basic 1	137.876	231.277	0.597892	-0.742043	0.0641886	0.619417
ENSMUSG00000048218	Amigo2	adhesion molecule with Ig like domain 2	80.1889	157.737	0.511469	-0.967282	0.0638451	0.619417
ENSMUSG00000086969	4930443O20Rik	RIKEN cDNA 4930443O20 gene	2.02339	10.9006	0.254052	-1.9768	0.0641707	0.619417
ENSMUSG00000039953	Clstn1	calsyntenin 1	1438.13	2004.01	0.717767	-0.478413	0.0644243	0.619417
ENSMUSG00000029672	Fam3c	family with sequence similarity 3, member C	348.127	509.121	0.684399	-0.54709	0.0638957	0.619417
ENSMUSG00000055799	Tcf7l1	transcription factor 7 like 1 (T cell specific, HMG box)	102.074	171.318	0.598163	-0.741389	0.0637224	0.619417
ENSMUSG00000001918	Slc1a5	solute carrier family 1 (neutral amino acid transporter), member 5	336.623	538.766	0.625499	-0.676921	0.0639743	0.619417
ENSMUSG00000009545	Kcnq1	potassium voltage-gated channel, subfamily Q, member 1	325.306	559.266	0.582413	-0.779885	0.0641836	0.619417
ENSMUSG00000091561	Gm6665	predicted gene 6665	110.089	183.699	0.601462	-0.733455	0.0646653	0.619737
ENSMUSG00000026814	Eng	endoglin	1241.24	2086.13	0.595189	-0.74858	0.0646262	0.619737
ENSMUSG00000031293	Rs1	retinoschisis (X-linked, juvenile) 1 (human)	4.08434	14.7266	0.323296	-1.62907	0.0646497	0.619737
ENSMUSG00000031722	Hp	haptoglobin	5.03799	17.5989	0.324643	-1.62307	0.0647513	0.619979
ENSMUSG00000004415	Col26a1	collagen, type XXVI, alpha 1	20.9399	43.3667	0.494512	-1.01592	0.0650231	0.620545
ENSMUSG00000037406	Htra4	HtrA serine peptidase 4	4.91385	19.1567	0.293393	-1.76909	0.0650048	0.620545
ENSMUSG00000028475	5430416O09Rik	RIKEN cDNA 5430416O09 gene	36.7968	88.8563	0.420636	-1.24936	0.065394	0.623211
ENSMUSG00000024076	Vit	vitrin	3.27829	11.6365	0.338566	-1.56249	0.0656339	0.624619
ENSMUSG00000029658	Wdr95	WD40 repeat domain 95	15.1906	43.8255	0.361193	-1.46916	0.0657243	0.624619
ENSMUSG00000031028	Tub	tubby candidate gene	6.53104	17.0789	0.416565	-1.26339	0.0657996	0.624619
ENSMUSG00000084960	B430010I23Rik	RIKEN cDNA B430010I23 gene	38.6333	72.9449	0.535984	-0.899739	0.065817	0.624619
ENSMUSG00000054072	Iigp1	interferon inducible GTPase 1	299.089	535.715	0.559122	-0.838764	0.0659425	0.625295
ENSMUSG00000026556	Vangl2	vang-like 2 (van gogh, Drosophila)	49.9526	82.7429	0.608441	-0.716811	0.0659843	0.625335
ENSMUSG00000021765	Fst	follistatin	61.9467	105.066	0.593465	-0.752766	0.0663628	0.626894
ENSMUSG00000084845	Tmem240	transmembrane protein 240	6.59395	20.6721	0.350401	-1.51292	0.0662657	0.626894
ENSMUSG00000050335	Lgals3	lectin, galactose binding, soluble 3	375.022	605.809	0.619671	-0.690425	0.0665513	0.627795
ENSMUSG00000053093	Myh7	myosin, heavy polypeptide 7, cardiac muscle, beta	6.4698	21.206	0.336386	-1.57181	0.0666646	0.628284
ENSMUSG00000022622	Acr	acrosin prepropeptide	1.78863	10.5867	0.240675	-2.05484	0.0668469	0.629131
ENSMUSG00000026586	Prrx1	paired related homeobox 1	16.8506	47.1143	0.371005	-1.43049	0.0670738	0.629816
ENSMUSG00000024533	Spire1	spire homolog 1 (Drosophila)	585.731	847.904	0.691163	-0.532901	0.0669826	0.629816
ENSMUSG00000007476	Lrrc8a	leucine rich repeat containing 8A	1179.16	1697.34	0.694891	-0.525141	0.0670124	0.629816
ENSMUSG00000026141	Col19a1	collagen, type XIX, alpha 1	28.1265	77.6413	0.370372	-1.43295	0.0672498	0.630888
ENSMUSG00000080741	Gm11398	predicted gene 11398	71.3001	133.324	0.538251	-0.89365	0.0673269	0.631321
ENSMUSG00000006269	Atp6v1b1	ATPase, H+ transporting, lysosomal V1 subunit B1	700.478	1158.19	0.605144	-0.724649	0.0674682	0.631776
ENSMUSG00000090232	Gm16132	predicted gene 16132	1.39762	10.0815	0.216362	-2.20848	0.0675053	0.631834
ENSMUSG00000073599	Ecscr	endothelial cell surface expressed chemotaxis and apoptosis regulator	90.9348	146.188	0.624609	-0.678974	0.0675829	0.63227
ENSMUSG00000021974	Fgf9	fibroblast growth factor 9	216.952	383.931	0.566212	-0.820586	0.0677913	0.632332
ENSMUSG00000043501	Lgals2	lectin, galactose-binding, soluble 2	9.69851	24.2535	0.423645	-1.23907	0.067628	0.632332
ENSMUSG00000081404	Gm15694	predicted gene 15694	0	4.49058	0.18213	-2.45696	0.0678035	0.632332
ENSMUSG00000046449	C77370	expressed sequence C77370	40.4261	78.0353	0.524147	-0.931956	0.0676917	0.632332
ENSMUSG00000001403	Ube2c	ubiquitin-conjugating enzyme E2C	3.59812	14.1393	0.303722	-1.71918	0.0678823	0.632464
ENSMUSG00000026605	Cenpf	centromere protein F	35.694	101.401	0.358336	-1.48061	0.0682233	0.632467
ENSMUSG00000037336	Mfsd2b	major facilitator superfamily domain containing 2B	26.7117	53.6542	0.507037	-0.979836	0.0681303	0.632467
ENSMUSG00000038545	Cul7	cullin 7	426.53	612.513	0.696855	-0.521069	0.0680759	0.632467
ENSMUSG00000028063	Lmna	lamin A	1291.36	2006	0.643929	-0.635027	0.0681478	0.632467
ENSMUSG00000037613	Tnfrsf23	tumor necrosis factor receptor superfamily, member 23	13.0329	30.9765	0.438852	-1.18819	0.0679568	0.632467
ENSMUSG00000028539	Artn	artemin	15.1043	29.7831	0.523153	-0.934695	0.0683118	0.632529
ENSMUSG00000061535	C1qtnf7	C1q and tumor necrosis factor related protein 7	14.5502	30.0316	0.50111	-0.996801	0.0683212	0.632529
ENSMUSG00000002908	Kcnn1	potassium intermediate/small conductance calcium-activated channel, subfamily N, member 1	35.087	67.1023	0.529895	-0.916223	0.0683849	0.632529
ENSMUSG00000050394	Armcx6	armadillo repeat containing, X-linked 6	13.5924	29.9633	0.471281	-1.08534	0.0683467	0.632529
ENSMUSG00000038188	Scarf1	scavenger receptor class F, member 1	100.412	166.152	0.606706	-0.720932	0.0685422	0.632544
ENSMUSG00000060969	Irx1	Iroquois related homeobox 1 (Drosophila)	346.631	559.912	0.61976	-0.690219	0.0684943	0.632544
ENSMUSG00000028037	Ifi44	interferon-induced protein 44	252.241	388.454	0.650246	-0.620942	0.0684832	0.632544
ENSMUSG00000040703	Cyp2s1	cytochrome P450, family 2, subfamily s, polypeptide 1	80.9468	148.113	0.549564	-0.863642	0.0684366	0.632544
ENSMUSG00000053560	Ier2	immediate early response 2	1213.22	1793.74	0.676542	-0.563749	0.0685723	0.632544
ENSMUSG00000086098	Gm14291	predicted gene 14291	0	4.44697	0.183588	-2.44545	0.0687152	0.633004
ENSMUSG00000064325	Hhip	Hedgehog-interacting protein	7.4631	40.7191	0.202859	-2.30145	0.0686692	0.633004
ENSMUSG00000031748	Gnao1	guanine nucleotide binding protein, alpha O	29.63	80.3639	0.376457	-1.40944	0.0687147	0.633004
ENSMUSG00000032374	Plod2	procollagen lysine, 2-oxoglutarate 5-dioxygenase 2	256.144	390.091	0.657504	-0.604929	0.0687983	0.633484
ENSMUSG00000015452	Ager	advanced glycosylation end product-specific receptor	6.80446	20.6642	0.360246	-1.47295	0.0696579	0.637578
ENSMUSG00000027993	Trim2	tripartite motif-containing 2	1069.36	1508.32	0.709166	-0.495806	0.0696959	0.637578
ENSMUSG00000029759	Pon3	paraoxonase 3	101.543	226.32	0.451095	-1.1485	0.0697204	0.637578
ENSMUSG00000048200	Cracr2b	calcium release activated channel regulator 2B	83.2965	147.024	0.569478	-0.812287	0.0697482	0.637578
ENSMUSG00000020649	Rrm2	ribonucleotide reductase M2	33.4327	59.6224	0.567986	-0.816073	0.0698633	0.637826
ENSMUSG00000021385	Ippk	inositol 1,3,4,5,6-pentakisphosphate 2-kinase	151.783	228.097	0.666895	-0.584469	0.0701797	0.639244
ENSMUSG00000067063	Gm6990	predicted pseudogene 6990	2.26153	10.0746	0.294505	-1.76364	0.0702064	0.639244
[truncated: 7,936 more rows]
