# Supplementary material for: Sex differences in transcriptomic profiles in aged kidney cells of renin lineage
Source: Aging (Albany NY). 2018 Apr 18;10(4):606–21. doi: 10.18632/aging.101416 (PMC5940125; doi:10.18632/aging.101416)
Supplement: Supplementary Table S4 [file aging-10-101416-s004.xlsx]

## Sheet: up_young_female
Table S4 Differentially expressed genes, young female vs. young male mice CoRL, up in female/down in male
gene.id	gene.symbol	gene.name	Female	Male	foldChange	log2FoldChange	pval	padj
ENSMUSG00000028715	Cyp4a14	cytochrome P450, family 4, subfamily a, polypeptide 14	3036.98	53.6973	55.5416	5.7955	6.92026e-93	6.87632e-89
ENSMUSG00000005268	Prlr	prolactin receptor	1630.39	41.4735	38.4096	5.26339	4.35899e-72	2.16566e-68
ENSMUSG00000090171	Ugt1a2	UDP glucuronosyltransferase 1 family, polypeptide A2	2070.1	12.1973	156.934	7.29402	1.14397e-31	2.526e-28
ENSMUSG00000074639	Rdh16f2	RDH16 family member 2	1228.03	75.0635	16.1579	4.01417	2.02793e-26	3.35842e-23
ENSMUSG00000029445	Hpd	4-hydroxyphenylpyruvic acid dioxygenase	2278.66	330.581	6.87513	2.78139	5.39495e-26	7.65813e-23
ENSMUSG00000027870	Hao2	hydroxyacid oxidase 2	3115.25	612.228	5.08171	2.34531	5.22015e-23	6.916e-20
ENSMUSG00000057933	Gsta2	glutathione S-transferase, alpha 2 (Yc2)	1041.9	189.431	5.47653	2.45326	5.63321e-21	6.9968e-18
ENSMUSG00000085541	Gm16010	predicted gene 16010	908.822	155.931	5.79761	2.53546	8.93543e-21	1.04455e-17
ENSMUSG00000066072	Cyp4a10	cytochrome P450, family 4, subfamily a, polypeptide 10	1707.64	349.161	4.87958	2.28676	3.0307e-20	3.34606e-17
ENSMUSG00000075044	Slc22a29	solute carrier family 22. member 29	240.165	16.0619	14.1347	3.82117	2.50183e-16	2.61678e-13
ENSMUSG00000026866	Kynu	kynureninase (L-kynurenine hydrolase)	261.012	29.4122	8.61537	3.10691	2.13217e-15	2.11863e-12
ENSMUSG00000021884	Hacl1	2-hydroxyacyl-CoA lyase 1	788.178	195.162	4.0231	2.00831	7.11397e-14	6.42618e-11
ENSMUSG00000074768	Bhmt	betaine-homocysteine methyltransferase	119.973	10.2316	10.7708	3.42905	4.96614e-12	3.79585e-09
ENSMUSG00000051483	Cbr1	carbonyl reductase 1	809.6	234.872	3.43661	1.78098	7.79923e-12	5.74052e-09
ENSMUSG00000035540	Gc	vitamin D binding protein	519.947	136.145	3.79851	1.92543	4.37497e-11	3.10514e-08
ENSMUSG00000021228	Acot3	acyl-CoA thioesterase 3	381.782	93.0043	4.07196	2.02572	7.06099e-11	4.83873e-08
ENSMUSG00000039246	Lyplal1	lysophospholipase-like 1	373.762	92.4706	4.00941	2.00339	8.02924e-11	5.31883e-08
ENSMUSG00000025197	Cyp2c44	cytochrome P450, family 2, subfamily c, polypeptide 44	306.644	73.1183	4.15071	2.05336	2.30445e-10	1.4773e-07
ENSMUSG00000029260	Ugt2b34	UDP glucuronosyltransferase 2 family, polypeptide B34	442.583	120.199	3.65995	1.87182	3.70342e-10	2.23025e-07
ENSMUSG00000025196	Cpn1	carboxypeptidase N, polypeptide 1	518.647	162.495	3.17837	1.66829	5.55861e-09	2.98558e-06
ENSMUSG00000074179	Gm10639	predicted gene 10639	85.1525	8.60657	8.96808	3.1648	2.41111e-08	1.22862e-05
ENSMUSG00000030562	Nox4	NADPH oxidase 4	2944.36	1225.36	2.4017	1.26406	3.75354e-08	1.81937e-05
ENSMUSG00000024899	Papss2	3'-phosphoadenosine 5'-phosphosulfate synthase 2	2768.93	1083.33	2.55451	1.35305	4.19263e-08	1.93768e-05
ENSMUSG00000039653	Baat	bile acid-Coenzyme A: amino acid N-acyltransferase	74.0588	6.361	10.1968	3.35005	6.66546e-08	3.01052e-05
ENSMUSG00000026726	Cubn	cubilin (intrinsic factor-cobalamin receptor)	9061.12	4028.93	2.2487	1.16909	1.63115e-07	7.2035e-05
ENSMUSG00000022445	Cyp2d26	cytochrome P450, family 2, subfamily d, polypeptide 26	1285.57	542.45	2.3674	1.24331	2.57345e-07	0.000111179
ENSMUSG00000021364	Elovl2	elongation of very long chain fatty acids (FEN1/Elo2, SUR4/Elo3, yeast)-like 2	274.019	88.1116	3.08623	1.62584	6.03422e-07	0.000255145
ENSMUSG00000032348	Gsta4	glutathione S-transferase, alpha 4	742.646	306.425	2.41896	1.27438	6.98535e-07	0.000289208
ENSMUSG00000034845	Plvap	plasmalemma vesicle associated protein	2089.89	948.373	2.20239	1.13907	8.21038e-07	0.00033299
ENSMUSG00000001467	Cyp51	cytochrome P450, family 51	867.821	380.178	2.27931	1.18859	1.49494e-06	0.000594179
ENSMUSG00000024757	Slc22a19	solute carrier family 22 (organic anion transporter), member 19	244.242	18.4714	12.595	3.65478	3.2936e-06	0.0012834
ENSMUSG00000038094	Atp13a4	ATPase type 13A4	32.3325	0	33.3325	5.05886	3.4335e-06	0.00131219
ENSMUSG00000069456	Rdh16	retinol dehydrogenase 16	954.499	422.103	2.25832	1.17525	3.93286e-06	0.00144737
ENSMUSG00000032327	Stra6	stimulated by retinoic acid gene 6	72.9542	10.8611	6.235	2.64039	4.18784e-06	0.00151318
ENSMUSG00000027199	Gatm	glycine amidinotransferase (L-arginine:glycine amidinotransferase)	8514.55	4318.36	1.97148	0.979282	7.21388e-06	0.00251511
ENSMUSG00000022512	Cldn1	claudin 1	190.856	63.1372	2.99133	1.58079	7.3723e-06	0.00252603
ENSMUSG00000032788	Pdxk	pyridoxal (pyridoxine, vitamin B6) kinase	1367.07	654.616	2.0867	1.06122	8.85841e-06	0.00298378
ENSMUSG00000085412	Halr1	Hoxa adjacent long noncoding RNA 1	124.561	32.2611	3.775	1.91648	9.09615e-06	0.0030128
ENSMUSG00000021751	Acox2	acyl-Coenzyme A oxidase 2, branched chain	389.001	165.746	2.33889	1.22582	1.34908e-05	0.00439513
ENSMUSG00000069324	Gm5096	predicted gene 5096	55.1039	6.90685	7.09561	2.82693	1.55529e-05	0.00490609
ENSMUSG00000026295	Spp2	secreted phosphoprotein 2	1506.1	724.301	2.0779	1.05513	2.16269e-05	0.00671549
ENSMUSG00000090817	Gm4450	predicted gene 4450	239.554	72.0721	3.29201	1.71897	2.69138e-05	0.00822859
ENSMUSG00000032849	Abcc4	ATP-binding cassette, sub-family C (CFTR/MRP), member 4	1615.65	812.585	1.98707	0.990645	2.90572e-05	0.00874929
ENSMUSG00000021765	Fst	follistatin	258.38	100.625	2.55233	1.35182	4.34698e-05	0.0123411
ENSMUSG00000021456	Fbp2	fructose bisphosphatase 2	201.959	74.8026	2.67746	1.42087	5.80075e-05	0.0162364
ENSMUSG00000028012	Rrh	retinal pigment epithelium derived rhodopsin homolog	82.9093	16.074	4.91444	2.29703	6.94765e-05	0.0189138
ENSMUSG00000025934	Gsta3	glutathione S-transferase, alpha 3	614.33	297.739	2.05976	1.04247	7.84045e-05	0.0207924
ENSMUSG00000026473	Glul	glutamate-ammonia ligase (glutamine synthetase)	4133.72	2191.42	1.88592	0.915268	7.84698e-05	0.0207924
ENSMUSG00000038725	Pkhd1l1	polycystic kidney and hepatic disease 1-like 1	26.5741	1.07958	13.2594	3.72895	8.8816e-05	0.0232242
ENSMUSG00000024354	Slc23a1	solute carrier family 23 (nucleobase transporters), member 1	1126.12	541.106	2.07914	1.05599	9.58671e-05	0.0238545
ENSMUSG00000038526	Car14	carbonic anhydrase 14	819.484	381.323	2.14605	1.10168	9.70156e-05	0.0238545
ENSMUSG00000034785	Dio1	deiodinase, iodothyronine, type I	163.782	60.5469	2.67734	1.4208	9.51909e-05	0.0238545
ENSMUSG00000050866	Clrn3	clarin 3	299.33	127.401	2.33899	1.22589	9.72282e-05	0.0238545
ENSMUSG00000022613	Miox	myo-inositol oxygenase	10900.4	5178.02	2.10492	1.07377	0.000103206	0.0250125
ENSMUSG00000029368	Alb	albumin	127.581	42.5565	2.95204	1.56171	0.000114371	0.0273842
ENSMUSG00000034918	Cdhr2	cadherin-related family member 2	309.371	134.839	2.28485	1.1921	0.000139806	0.0326865
ENSMUSG00000043300	B3galnt1	UDP-GalNAc:betaGlcNAc beta 1,3-galactosaminyltransferase, polypeptide 1	285.998	126.166	2.25688	1.17433	0.000156477	0.0357432
ENSMUSG00000028553	Angptl3	angiopoietin-like 3	182.823	71.6349	2.53078	1.33958	0.000166823	0.0376735
ENSMUSG00000027016	Zfp385b	zinc finger protein 385B	130.258	44.5054	2.88446	1.5283	0.000213231	0.0470839
ENSMUSG00000022180	Slc7a8	solute carrier family 7 (cationic amino acid transporter, y+ system), member 8	4530.55	2195.74	2.06286	1.04464	0.000227935	0.0497775
ENSMUSG00000027820	Mme	membrane metallo endopeptidase	1526.61	852.483	1.78985	0.839838	0.000259713	0.0549072
ENSMUSG00000040283	Btnl9	butyrophilin-like 9	243.029	100.467	2.405	1.26604	0.000275389	0.0566353
ENSMUSG00000070985	Acnat1	acyl-coenzyme A amino acid N-acyltransferase 1	280.671	116.232	2.40269	1.26465	0.000276436	0.0566353
ENSMUSG00000019767	Ccdc170	coiled-coil domain containing 170	84.1341	20.5527	3.95004	1.98187	0.000303942	0.0616351
ENSMUSG00000044816	D630023F18Rik	RIKEN cDNA D630023F18 gene	695.809	363.516	1.9116	0.934781	0.000315463	0.0633252
ENSMUSG00000023122	Sult1c2	sulfotransferase family, cytosolic, 1C, member 2	824.397	446.705	1.84362	0.882539	0.000321823	0.0639559
ENSMUSG00000082100	Glns-ps1	glutamine synthetase pseudogene 1	606.851	309.211	1.95948	0.97047	0.00032776	0.0643691
ENSMUSG00000020182	Ddc	dopa decarboxylase	436.324	220.248	1.97662	0.983037	0.000357341	0.068946
ENSMUSG00000089960	Ugt1a1	UDP glucuronosyltransferase 1 family, polypeptide A1	19.2741	0.319066	15.37	3.94205	0.000365105	0.0697667
ENSMUSG00000042102	Dmgdh	dimethylglycine dehydrogenase precursor	505.304	258.493	1.95113	0.964307	0.000371465	0.0703059
ENSMUSG00000031980	Agt	angiotensinogen (serpin peptidase inhibitor, clade A, member 8)	259.254	120.083	2.14938	1.10392	0.000386495	0.0711187
ENSMUSG00000025221	Kcnip2	Kv channel-interacting protein 2	51.6497	10.2945	4.66152	2.2208	0.000406483	0.0734366
ENSMUSG00000028527	Ak4	adenylate kinase 4	1088.02	593.722	1.83115	0.872747	0.000419632	0.0751293
ENSMUSG00000090165	Ugt1a10	UDP glycosyltransferase 1 family, polypeptide A10	20.1886	0.638132	12.9346	3.69317	0.000477703	0.0847624
ENSMUSG00000038602	Slc35f1	solute carrier family 35, member F1	115.943	37.5458	3.03389	1.60117	0.000520101	0.090644
ENSMUSG00000039710	Slc7a12	solute carrier family 7 (cationic amino acid transporter, y+ system), member 12	296.037	3.17889	71.0804	6.15138	0.000552982	0.0947363
ENSMUSG00000040181	Fmo1	flavin containing monooxygenase 1	4236.82	2441.56	1.73499	0.794926	0.000571087	0.0970017
ENSMUSG00000029086	Prom1	prominin 1	2387.23	1344.58	1.77487	0.827713	0.000596681	0.0996457
ENSMUSG00000074183	Gsta1	glutathione S-transferase, alpha 1 (Ya)	17.3411	0.42346	12.8849	3.68761	0.00059176	0.0996457
ENSMUSG00000040405	Havcr1	hepatitis A virus cellular receptor 1	143.958	14.0163	9.65338	3.27103	0.000695139	0.113234
ENSMUSG00000005233	Spc25	SPC25, NDC80 kinetochore complex component, homolog (S. cerevisiae)	460.524	205.692	2.2329	1.15892	0.000690076	0.113234
ENSMUSG00000040584	Abcb1a	ATP-binding cassette, sub-family B (MDR/TAP), member 1A	164.015	68.219	2.38395	1.25335	0.000829327	0.13185
ENSMUSG00000053550	Shisa7	shisa family member 7	167.371	71.1511	2.33359	1.22255	0.000855483	0.134929
ENSMUSG00000006641	Slc5a6	solute carrier family 5 (sodium-dependent vitamin transporter), member 6	138.09	58.6911	2.33017	1.22043	0.000987959	0.151029
ENSMUSG00000031700	Gpt2	glutamic pyruvate transaminase (alanine aminotransferase) 2	569.831	300.116	1.89571	0.922742	0.0010162	0.15416
ENSMUSG00000006538	Ihh	Indian hedgehog	115.414	44.0377	2.58481	1.37006	0.00119718	0.179094
ENSMUSG00000036775	Decr2	2-4-dienoyl-Coenzyme A reductase 2, peroxisomal	432.085	230.668	1.86942	0.902588	0.00128621	0.187947
ENSMUSG00000058022	Adtrp	androgen dependent TFPI regulating protein	298.001	154.428	1.92373	0.943903	0.0013417	0.194625
ENSMUSG00000022323	Rida	reactive intermediate imine deaminase A homolog	3971.88	2182.49	1.81951	0.863552	0.00145291	0.205807
ENSMUSG00000028179	Cth	cystathionase (cystathionine gamma-lyase)	1110.77	650.1	1.70752	0.7719	0.00144727	0.205807
ENSMUSG00000031827	Cotl1	coactosin-like 1 (Dictyostelium)	1755.32	1042.27	1.68347	0.751439	0.00146021	0.205807
ENSMUSG00000025027	Xpnpep1	X-prolyl aminopeptidase (aminopeptidase P) 1, soluble	1444.54	866.501	1.66633	0.736673	0.00157867	0.219391
ENSMUSG00000041220	Elovl6	ELOVL family member 6, elongation of long chain fatty acids (yeast)	706.237	406.574	1.73524	0.795133	0.00176106	0.241362
ENSMUSG00000002985	Apoe	apolipoprotein E	7278.69	4492.51	1.62005	0.696035	0.00179059	0.243729
ENSMUSG00000025321	Itgb8	integrin beta 8	2161.64	1313.81	1.64483	0.717936	0.0018692	0.248454
ENSMUSG00000027187	Cat	catalase	8073.1	4774.32	1.6908	0.757705	0.00186616	0.248454
ENSMUSG00000029304	Spp1	secreted phosphoprotein 1	11460.8	7055.43	1.62431	0.699823	0.00184269	0.248454
ENSMUSG00000030769	Slc5a11	solute carrier family 5 (sodium/glucose cotransporter), member 11	284.922	150.099	1.89229	0.920133	0.00187531	0.248454
ENSMUSG00000027070	Lrp2	low density lipoprotein receptor-related protein 2	55706.8	34563.3	1.61172	0.688599	0.00197961	0.2547
ENSMUSG00000032841	Prr5l	proline rich 5 like	110.516	38.2062	2.84434	1.50809	0.00194365	0.2547
ENSMUSG00000027875	Hmgcs2	3-hydroxy-3-methylglutaryl-Coenzyme A synthase 2	457.752	155.132	2.93822	1.55494	0.0021482	0.271919
ENSMUSG00000035459	Stab2	stabilin 2	159.148	75.3785	2.09677	1.06817	0.00222879	0.280334
ENSMUSG00000056328	Myh1	myosin, heavy polypeptide 1, skeletal muscle, adult	11.9538	0	12.9538	3.69531	0.00243939	0.299246
ENSMUSG00000026692	Fmo4	flavin containing monooxygenase 4	193.672	92.5259	2.08147	1.05761	0.00248393	0.301285
ENSMUSG00000074796	Slc4a11	solute carrier family 4, sodium bicarbonate transporter-like, member 11	452.36	250.632	1.80167	0.849337	0.00248633	0.301285
ENSMUSG00000010651	Acaa1b	acetyl-Coenzyme A acyltransferase 1B	763.975	375.109	2.03392	1.02426	0.00264874	0.318417
ENSMUSG00000019970	Sgk1	serum/glucocorticoid regulated kinase 1	3365	2055.27	1.63695	0.711009	0.00278749	0.326967
ENSMUSG00000040213	Kyat3	kynurenine aminotransferase 3	274.798	151.027	1.81414	0.859282	0.00278877	0.326967
ENSMUSG00000030934	Oat	ornithine aminotransferase	2391.48	1499.85	1.59408	0.672725	0.00281343	0.326967
ENSMUSG00000028544	Slc5a9	solute carrier family 5 (sodium/glucose cotransporter), member 9	205.177	103.518	1.97265	0.980136	0.00289264	0.334218
ENSMUSG00000044254	Pcsk9	proprotein convertase subtilisin/kexin type 9	123.436	54.0572	2.26012	1.1764	0.00291903	0.335318
ENSMUSG00000043681	Fam25c	family with sequence similarity 25, member C	17.3411	1.06159	8.89657	3.15325	0.00297278	0.339529
ENSMUSG00000024164	C3	complement component 3	1038.26	637.896	1.62665	0.701904	0.00325109	0.364048
ENSMUSG00000081957	Ak3l2-ps	adenylate kinase 3-like 2, pseudogene	542.08	313.68	1.72582	0.787279	0.0032859	0.364048
ENSMUSG00000031628	Casp3	caspase 3	150.393	70.1778	2.12696	1.0888	0.00324564	0.364048
ENSMUSG00000032607	Amt	aminomethyltransferase	466.649	265.336	1.75586	0.812178	0.00340695	0.374068
ENSMUSG00000037071	Scd1	stearoyl-Coenzyme A desaturase 1	2604.48	389.626	6.67002	2.73769	0.00345537	0.3773
ENSMUSG00000026368	F13b	coagulation factor XIII, beta subunit	756.531	447.999	1.68716	0.754593	0.0035106	0.381236
ENSMUSG00000064354	mt-Co2	mitochondrially encoded cytochrome c oxidase II	1027.78	508.314	2.01994	1.01431	0.00353218	0.381494
ENSMUSG00000037709	Fam13a	family with sequence similarity 13, member A	2094.83	1322.22	1.58389	0.66347	0.0035928	0.385944
ENSMUSG00000023031	Cela1	chymotrypsin-like elastase family, member 1	319.111	138.351	2.29716	1.19985	0.00370509	0.39375
ENSMUSG00000076435	Acsf2	acyl-CoA synthetase family member 2	157.586	75.0105	2.08637	1.061	0.00372672	0.393942
ENSMUSG00000044986	Tst	thiosulfate sulfurtransferase, mitochondrial	225.239	120.909	1.8558	0.892043	0.00386345	0.406235
ENSMUSG00000058952	Cfi	complement component factor i	71.0529	25.5069	2.71827	1.44269	0.0039175	0.40975
ENSMUSG00000074063	Osgin1	oxidative stress induced growth inhibitor 1	862.341	501.598	1.71776	0.780526	0.00398787	0.414927
ENSMUSG00000053279	Aldh1a1	aldehyde dehydrogenase family 1, subfamily A1	274.829	117.071	2.33613	1.22412	0.00419351	0.43296
ENSMUSG00000030909	Anks4b	ankyrin repeat and sterile alpha motif domain containing 4B	731.938	444.23	1.6462	0.719138	0.00420476	0.43296
ENSMUSG00000023333	Gcm1	glial cells missing homolog 1 (Drosophila)	23.6315	2.93457	6.26029	2.64623	0.00422856	0.433166
ENSMUSG00000024131	Slc3a1	solute carrier family 3, member 1	2264.43	1447.13	1.56439	0.645598	0.00436773	0.445128
ENSMUSG00000025950	Idh1	isocitrate dehydrogenase 1 (NADP+), soluble	4381.5	2763.61	1.58521	0.664674	0.00450626	0.452979
ENSMUSG00000015653	Steap2	six transmembrane epithelial antigen of prostate 2	1621.39	960.633	1.68712	0.754561	0.0045501	0.452979
ENSMUSG00000037703	Lzts3	leucine zipper, putative tumor suppressor family member 3	1763.03	1100.65	1.60127	0.679213	0.00462194	0.456974
ENSMUSG00000021913	Ogdhl	oxoglutarate dehydrogenase-like	102.183	33.3529	3.00363	1.58671	0.00466808	0.459251
ENSMUSG00000066097	Cyp2j11	cytochrome P450, family 2, subfamily j, polypeptide 11	970.515	589.885	1.64417	0.717359	0.00493432	0.480685
ENSMUSG00000055430	Nap1l5	nucleosome assembly protein 1-like 5	149.881	64.2122	2.31369	1.2102	0.0053847	0.51201
ENSMUSG00000054986	Sec14l3	SEC14-like lipid binding 3	148.039	13.5329	10.2552	3.35829	0.00546065	0.51676
ENSMUSG00000020051	Pah	phenylalanine hydroxylase	5518.56	3620.82	1.52398	0.60784	0.00570778	0.534125
ENSMUSG00000031665	Sall1	sal-like 1 (Drosophila)	1357.51	852.332	1.59201	0.670847	0.00572478	0.534125
ENSMUSG00000027896	Slc16a4	solute carrier family 16 (monocarboxylic acid transporters), member 4	389.156	226.306	1.71644	0.779418	0.00588149	0.543641
ENSMUSG00000072962	Gm16401	predicted gene 16401	49.7053	14.1058	3.35668	1.74704	0.00598829	0.548411
ENSMUSG00000036151	Tm6sf2	transmembrane 6 superfamily member 2	22.9298	3.09837	5.83885	2.54568	0.00604466	0.549214
ENSMUSG00000030834	Abcc6	ATP-binding cassette, sub-family C (CFTR/MRP), member 6	150.87	74.5963	2.00896	1.00645	0.00608357	0.54954
ENSMUSG00000021213	Akr1c13	aldo-keto reductase family 1, member C13	59.7464	20.6688	2.80341	1.48718	0.00637213	0.57042
ENSMUSG00000021379	Id4	inhibitor of DNA binding 4	359.611	209.109	1.7163	0.779305	0.00635015	0.57042
ENSMUSG00000022899	Slc15a2	solute carrier family 15 (H+/peptide transporter), member 2	355.48	193.474	1.83304	0.874241	0.00663227	0.591045
ENSMUSG00000006378	Gcat	glycine C-acetyltransferase (2-amino-3-ketobutyrate-coenzyme A ligase)	382.046	218.498	1.7451	0.803313	0.00672717	0.596826
ENSMUSG00000029314	Gpat3	glycerol-3-phosphate acyltransferase 3	179.869	95.1869	1.88039	0.91103	0.00676491	0.597507
ENSMUSG00000058443	Rpl10-ps3	ribosomal protein L10, pseudogene 3	362.841	219.994	1.64638	0.719301	0.00712409	0.626447
ENSMUSG00000032511	Scn5a	sodium channel, voltage-gated, type V, alpha	24.6727	3.96017	5.17577	2.37177	0.00752233	0.658552
ENSMUSG00000046070	Igfals	insulin-like growth factor binding protein, acid labile subunit	82.5608	36.1524	2.24913	1.16937	0.00758934	0.661504
ENSMUSG00000029369	Afm	afamin	576.409	356.409	1.61554	0.692016	0.007972	0.688815
ENSMUSG00000022821	Hgd	homogentisate 1, 2-dioxygenase	1344.95	859.475	1.56419	0.645416	0.00801731	0.689732
ENSMUSG00000037440	Vnn1	vanin 1	433.699	252.427	1.71528	0.778445	0.00814227	0.691501
ENSMUSG00000090610	Gm3571	predicted gene 3571	119.366	58.223	2.03242	1.0232	0.00812561	0.691501
ENSMUSG00000042770	Hebp1	heme binding protein 1	216.323	117.453	1.83468	0.875529	0.00818218	0.691934
ENSMUSG00000035000	Dpp4	dipeptidylpeptidase 4	936.008	589.071	1.58796	0.667174	0.00822036	0.692217
ENSMUSG00000020089	Ppa1	pyrophosphatase (inorganic) 1	230.371	125.306	1.83182	0.873279	0.0082856	0.693332
ENSMUSG00000032735	Ablim3	actin binding LIM protein family, member 3	168.922	87.0582	1.92965	0.948342	0.00854703	0.70773
ENSMUSG00000028937	Acot7	acyl-CoA thioesterase 7	191.938	103.031	1.85462	0.891121	0.00870154	0.717534
ENSMUSG00000046798	Cldn12	claudin 12	602.716	370.804	1.62375	0.699328	0.00924339	0.746723
ENSMUSG00000078439	Smim24	small integral membrane protein 24	619.755	317.673	1.94794	0.961948	0.00957234	0.763981
ENSMUSG00000034159	2310007B03Rik	RIKEN cDNA 2310007B03 gene	31.3774	8.42155	3.43652	1.78095	0.00981718	0.774194
ENSMUSG00000087613	Gm13855	predicted gene 13855	112.682	44.8048	2.48188	1.31143	0.00987832	0.775936
ENSMUSG00000022330	Osr2	odd-skipped related 2	385.802	238.15	1.61741	0.693682	0.0100279	0.784587
ENSMUSG00000039697	Ncoa7	nuclear receptor coactivator 7	2450.73	1645.23	1.4893	0.574635	0.010107	0.78767
ENSMUSG00000054545	Ugt1a6a	UDP glucuronosyltransferase 1 family, polypeptide A6A	80.6254	32.75	2.41853	1.27413	0.0104094	0.800486
ENSMUSG00000063796	Slc22a8	solute carrier family 22 (organic anion transporter), member 8	3932.14	1935.47	2.03108	1.02225	0.0104825	0.800486
ENSMUSG00000068587	Mgam	maltase-glucoamylase	763.161	490.62	1.55437	0.636332	0.0105131	0.800486
ENSMUSG00000090191	9230105E05Rik	RIKEN cDNA 9230105E05 gene	11.1887	0.42346	8.56276	3.09808	0.0105818	0.802368
ENSMUSG00000054385	Ceacam2	carcinoembryonic antigen-related cell adhesion molecule 2	207.926	29.9058	6.76008	2.75704	0.0111974	0.836566
ENSMUSG00000093580	Gm20706	predicted gene 20706	187.186	99.1807	1.87847	0.909557	0.0115064	0.844375
ENSMUSG00000054226	Tprkb	Tp53rk binding protein	632.395	400.765	1.57653	0.656753	0.0115144	0.844375
ENSMUSG00000037594	BC022687	cDNA sequence BC022687	158.713	87.2143	1.81052	0.856402	0.0120037	0.873808
ENSMUSG00000036106	Prr5	proline rich 5 (renal)	209.331	115.911	1.79906	0.847244	0.0121704	0.875933
ENSMUSG00000023089	Ndufa5	NADH dehydrogenase (ubiquinone) 1 alpha subcomplex, 5	1462.62	966	1.51357	0.597951	0.0121527	0.875933
ENSMUSG00000026200	Glb1l	galactosidase, beta 1-like	709.213	451.713	1.56879	0.649656	0.0124231	0.876609
ENSMUSG00000057880	Abat	4-aminobutyrate aminotransferase	1643.24	1079.14	1.52226	0.606211	0.0124392	0.876609
ENSMUSG00000024378	Stard4	StAR-related lipid transfer (START) domain containing 4	922.314	597.39	1.543	0.625734	0.0123918	0.876609
ENSMUSG00000025993	Slc40a1	solute carrier family 40 (iron-regulated transporter), member 1	406.348	251.635	1.6124	0.68921	0.0128118	0.898117
ENSMUSG00000024503	Spink1	serine peptidase inhibitor, Kazal type 1	666.885	422.857	1.57573	0.656021	0.0129251	0.898117
ENSMUSG00000022122	Ednrb	endothelin receptor type B	670.989	376.126	1.78187	0.833393	0.0130228	0.899091
ENSMUSG00000006717	Acot13	acyl-CoA thioesterase 13	1298.32	875.954	1.48163	0.567183	0.0135619	0.920144
ENSMUSG00000053897	Slc39a8	solute carrier family 39 (metal ion transporter), member 8	381.246	234.384	1.62392	0.699483	0.0135917	0.920144
ENSMUSG00000032357	Tinag	tubulointerstitial nephritis antigen	1241.8	751.629	1.65128	0.723588	0.0136279	0.920144
ENSMUSG00000021081	Serpina1f	serine (or cysteine) peptidase inhibitor, clade A, member 1F	382.731	53.7385	7.01026	2.80947	0.0137077	0.920312
ENSMUSG00000069805	Fbp1	fructose bisphosphatase 1	4283.67	2745.48	1.56006	0.641599	0.0139021	0.928304
ENSMUSG00000033096	Apmap	adipocyte plasma membrane associated protein	613.941	398.913	1.53769	0.620762	0.0139201	0.928304
ENSMUSG00000013584	Aldh1a2	aldehyde dehydrogenase family 1, subfamily A2	29.2949	7.07654	3.75098	1.90727	0.0144045	0.949653
ENSMUSG00000028712	Cyp4a31	cytochrome P450, family 4, subfamily a, polypeptide 31	803.293	400.022	2.00561	1.00404	0.0146094	0.955039
ENSMUSG00000025544	Tm9sf2	transmembrane 9 superfamily member 2	2211.94	1511.52	1.46308	0.549011	0.0147685	0.95601
ENSMUSG00000039385	Cdh6	cadherin 6	322.613	202.742	1.58835	0.667525	0.0147494	0.95601
ENSMUSG00000028970	Abcb1b	ATP-binding cassette, sub-family B (MDR/TAP), member 1B	263.727	143.993	1.82579	0.868519	0.014766	0.95601
ENSMUSG00000062588	Gm6104	predicted gene 6104	146.205	97.246	1.49833	0.583355	0.138289	1
ENSMUSG00000002459	Rgs20	regulator of G-protein signaling 20	8.2348	5.54107	1.41182	0.497554	0.71187	1
ENSMUSG00000033793	Atp6v1h	ATPase, H+ transporting, lysosomal V1 subunit H	776.425	766.465	1.01298	0.0186038	0.928546	1
ENSMUSG00000033740	St18	suppression of tumorigenicity 18	3.23008	1.27626	1.85834	0.894018	0.652353	1
ENSMUSG00000051285	Pcmtd1	protein-L-isoaspartate (D-aspartate) O-methyltransferase domain containing 1	1573.76	1358.84	1.15805	0.211692	0.367389	1
ENSMUSG00000048538	Gm9826	predicted gene 9826	67.3745	50.2001	1.33544	0.41731	0.668794	1
ENSMUSG00000081441	Gm6161	predicted gene 6161	11.4966	7.30021	1.50557	0.590312	0.643902	1
ENSMUSG00000067879	3110035E14Rik	RIKEN cDNA 3110035E14 gene	18.2126	8.67187	1.98644	0.990184	0.24259	1
ENSMUSG00000025915	Sgk3	serum/glucocorticoid regulated kinase 3	345.988	298.128	1.16	0.214123	0.406006	1
ENSMUSG00000046334	Gm6195	predicted pseudogene 6195	28.3918	18.2594	1.5261	0.609849	0.303419	1
ENSMUSG00000025917	Cops5	COP9 signalosome subunit 5	361.014	334.34	1.07954	0.110421	0.557155	1
ENSMUSG00000025937	Lactb2	lactamase, beta 2	2987.95	2699.79	1.1067	0.14626	0.493168	1
ENSMUSG00000067813	Xkr9	X-linked Kx blood group related 9	3.8571	1.27038	2.13933	1.09716	0.424565	1
ENSMUSG00000025932	Eya1	EYA transcriptional coactivator and phosphatase 1	10.1475	4.14508	2.16663	1.11546	0.261827	1
ENSMUSG00000032719	Sbspon	somatomedin B and thrombospondin, type 1 domain containing	35.18	24.6713	1.40936	0.495039	0.510023	1
ENSMUSG00000025921	Rdh10	retinol dehydrogenase 10 (all-trans)	309.403	281.304	1.09953	0.13689	0.632258	1
ENSMUSG00000025940	Tmem70	transmembrane protein 70	314.631	291.533	1.07896	0.10964	0.633598	1
ENSMUSG00000025779	Ly96	lymphocyte antigen 96	32.4706	17.8986	1.77106	0.824615	0.324705	1
ENSMUSG00000091020	Gm5828	predicted gene 5828	33.9804	30.8082	1.09973	0.137152	0.799913	1
ENSMUSG00000085125	Gm16070	predicted gene 16070	23.6632	21.3101	1.10547	0.14466	0.833875	1
ENSMUSG00000060128	Gm2710	predicted gene 2710	17.787	13.9654	1.25536	0.328103	0.731909	1
ENSMUSG00000025927	Tfap2b	transcription factor AP-2 beta	1287.97	1260.21	1.02201	0.0314133	0.859552	1
ENSMUSG00000043760	Pkhd1	polycystic kidney and hepatic disease 1	6379.2	6223.08	1.02508	0.0357424	0.892895	1
ENSMUSG00000090142	Gm15795	predicted gene 15795	17.3614	15.4923	1.11333	0.154881	1	1
ENSMUSG00000041859	Mcm3	minichromosome maintenance complex component 3	191.866	156.783	1.22235	0.289655	0.372824	1
ENSMUSG00000025931	Paqr8	progestin and adipoQ receptor family member VIII	32.7695	28.1365	1.15901	0.212894	0.730975	1
ENSMUSG00000025933	Tmem14a	transmembrane protein 14A	10.8809	9.35809	1.14702	0.197889	0.763017	1
ENSMUSG00000026156	B3gat2	beta-1,3-glucuronyltransferase 2 (glucuronosyltransferase S)	532.442	353.652	1.50413	0.588925	0.0231557	1
ENSMUSG00000026154	Sdhaf4	succinate dehydrogenase complex assembly factor 4	75.0797	74.4409	1.00847	0.0121646	0.860323	1
ENSMUSG00000026153	Fam135a	family with sequence similarity 135, member A	679.378	615.568	1.10349	0.142078	0.54129	1
ENSMUSG00000073725	Lmbrd1	LMBR1 domain containing 1	887.876	795.695	1.1157	0.157954	0.473283	1
ENSMUSG00000073722	4931408C20Rik	RIKEN cDNA 4931408C20 gene	13.1965	7.3835	1.69338	0.759908	0.607463	1
ENSMUSG00000048874	Phf3	PHD finger protein 3	2093.81	2089.21	1.0022	0.00317537	0.981366	1
ENSMUSG00000081402	Gm15455	predicted gene 15455	121.831	113.421	1.0735	0.102321	0.840214	1
ENSMUSG00000042182	Bend6	BEN domain containing 6	20.4217	17.1142	1.18259	0.241955	0.8547	1
ENSMUSG00000042111	Ccdc115	coiled-coil domain containing 115	187.669	134.361	1.39382	0.479043	0.144947	1
ENSMUSG00000026127	Imp4	IMP4, U3 small nucleolar ribonucleoprotein	224.368	220.201	1.01884	0.0269208	0.961937	1
ENSMUSG00000026126	Ptpn18	protein tyrosine phosphatase, non-receptor type 18	264.938	255.525	1.03669	0.0519863	0.780964	1
ENSMUSG00000026123	Plekhb2	pleckstrin homology domain containing, family B (evectins) member 2	1783.13	1606.71	1.10974	0.150221	0.508063	1
ENSMUSG00000037408	Cnnm4	cyclin M4	250.283	239.351	1.04549	0.0641725	0.807109	1
ENSMUSG00000001138	Cnnm3	cyclin M3	287.799	277.701	1.03623	0.0513487	0.888251	1
ENSMUSG00000067653	Ankrd23	ankyrin repeat domain 23	58.2276	51.2038	1.13455	0.182116	0.703212	1
ENSMUSG00000079610	Ankrd39	ankyrin repeat domain 39	49.5355	43.8703	1.12626	0.171536	0.795128	1
ENSMUSG00000026121	Sema4c	sema domain, immunoglobulin domain (Ig), transmembrane domain (TM) and short cytoplasmic domain, (semaphorin) 4C	242.166	212.654	1.13813	0.186665	0.563779	1
ENSMUSG00000061518	Cox5b	cytochrome c oxidase subunit Vb	311.059	302.214	1.02917	0.0414856	0.823464	1
ENSMUSG00000026117	Zap70	zeta-chain (TCR) associated protein kinase	21.6555	15.6349	1.36192	0.445645	0.493502	1
ENSMUSG00000080054	Rpl12-ps1	ribosomal protein L12, pseudogene 1	12.857	6.97526	1.7375	0.79701	0.395857	1
ENSMUSG00000026112	Coa5	cytochrome C oxidase assembly factor 5	734.541	645.923	1.13698	0.185211	0.400984	1
ENSMUSG00000026110	Mgat4a	mannoside acetylglucosaminyltransferase 4, isoenzyme A	567.561	433.78	1.3077	0.387028	0.141593	1
ENSMUSG00000087233	Gm43213	predicted gene 43213	130.928	97.6512	1.33732	0.419348	0.426024	1
ENSMUSG00000026090	2010300C02Rik	RIKEN cDNA 2010300C02 gene	23.5885	20.2579	1.15668	0.209984	0.726169	1
ENSMUSG00000037216	Lipt1	lipoyltransferase 1	50.1106	30.6124	1.61679	0.693132	0.190728	1
ENSMUSG00000026088	Mitd1	MIT, microtubule interacting and transport, domain containing 1	82.4	69.5578	1.18201	0.241243	0.609093	1
ENSMUSG00000026087	Mrpl30	mitochondrial ribosomal protein L30	373.561	296.194	1.26033	0.333796	0.179075	1
ENSMUSG00000058407	Txndc9	thioredoxin domain containing 9	361.774	360.338	1.00397	0.00572301	1	1
ENSMUSG00000026083	Eif5b	eukaryotic translation initiation factor 5B	2417.55	2395.01	1.00941	0.0135094	0.984615	1
ENSMUSG00000026082	Rev1	REV1, DNA directed polymerase	251.899	237.021	1.06251	0.0874767	0.673624	1
ENSMUSG00000026078	Pdcl3	phosducin-like 3	207.43	183.182	1.13165	0.178426	0.644432	1
ENSMUSG00000073702	Rpl31	ribosomal protein L31	23.5251	20.8421	1.12283	0.167145	0.838527	1
ENSMUSG00000003135	Cnot11	CCR4-NOT transcription complex, subunit 11	261.184	247.916	1.05331	0.0749243	0.797737	1
ENSMUSG00000077704	Snord89	small nucleolar RNA, C/D box 89	12.857	10.8521	1.16915	0.225466	0.777122	1
ENSMUSG00000048234	Rnf149	ring finger protein 149	622.929	561.958	1.10831	0.148356	0.530972	1
ENSMUSG00000070942	Il1rl2	interleukin 1 receptor-like 2	13.8665	12.5609	1.09628	0.13262	0.83258	1
ENSMUSG00000026065	Slc9a4	solute carrier family 9 (sodium/hydrogen exchanger), member 4	72.5286	62.5349	1.1573	0.210758	0.732436	1
ENSMUSG00000045515	Pou3f3	POU domain, class 3, transcription factor 3	1239.15	1086.38	1.1405	0.189666	0.386372	1
ENSMUSG00000060679	Mrps9	mitochondrial ribosomal protein S9	492.956	425.976	1.15687	0.210228	0.418302	1
ENSMUSG00000041878	8430432A02Rik	RIKEN cDNA 8430432A02 gene	6.64129	2.66003	2.08777	1.06196	0.329817	1
ENSMUSG00000010290	AI597479	expressed sequence AI597479	183.959	150.015	1.22477	0.292513	0.364454	1
ENSMUSG00000057363	Uxs1	UDP-glucuronate decarboxylase 1	272.604	220.16	1.23713	0.306997	0.380743	1
ENSMUSG00000026049	Tex30	testis expressed 30	26.7008	15.2628	1.70332	0.768354	0.463569	1
ENSMUSG00000026047	Kdelc1	KDEL (Lys-Asp-Glu-Leu) containing 1	110.93	96.2307	1.15118	0.20311	0.63563	1
ENSMUSG00000041684	Bivm	basic, immunoglobulin-like variable motif containing	177.689	146.028	1.21534	0.281357	0.395672	1
ENSMUSG00000026048	Ercc5	excision repair cross-complementing rodent repair deficiency, complementation group 5	381.868	362.646	1.05286	0.074311	0.800665	1
ENSMUSG00000089877	Gm16102	predicted gene 16102	4.13324	3.24464	1.20935	0.274228	0.934277	1
ENSMUSG00000084817	Gm5526	predicted pseudogene 5526	334.225	323.445	1.03322	0.0471541	0.884549	1
ENSMUSG00000026104	Stat1	signal transducer and activator of transcription 1	1173.59	1045.94	1.12193	0.165985	0.598664	1
ENSMUSG00000026102	Inpp1	inositol polyphosphate-1-phosphatase	104.205	102.052	1.02089	0.029828	0.917649	1
ENSMUSG00000043629	1700019D03Rik	RIKEN cDNA 1700019D03 gene	11.5713	7.14217	1.54397	0.626646	0.44675	1
ENSMUSG00000026097	Ormdl1	ORM1-like 1 (S. cerevisiae)	83.2537	56.8856	1.45552	0.541534	0.44889	1
ENSMUSG00000026095	Asnsd1	asparagine synthetase domain containing 1	371.458	328.062	1.13188	0.178718	0.43106	1
ENSMUSG00000041303	Gtf3c3	general transcription factor IIIC, polypeptide 3	209.089	197.887	1.05632	0.0790517	0.72479	1
ENSMUSG00000073678	Pgap1	post-GPI attachment to proteins 1	78.9368	77.1521	1.02284	0.0325769	0.99343	1
ENSMUSG00000089245	Gm24053	predicted gene, 24053	5.0364	1.60433	2.31783	1.21278	0.467673	1
ENSMUSG00000025981	Coq10b	coenzyme Q10B	222.34	221.394	1.00425	0.00612074	0.980329	1
ENSMUSG00000025980	Hspd1	heat shock protein 1 (chaperonin)	1725	1661.48	1.03821	0.0540989	0.809243	1
ENSMUSG00000073676	Hspe1	heat shock protein 1 (chaperonin 10)	909.498	743.148	1.22354	0.291066	0.179534	1
ENSMUSG00000046994	Mars2	methionine-tRNA synthetase 2 (mitochondrial)	62.3292	43.6916	1.41702	0.502865	0.294742	1
ENSMUSG00000038331	Satb2	special AT-rich sequence binding protein 2	217.928	171.479	1.2693	0.344037	0.328928	1
ENSMUSG00000038305	Spats2l	spermatogenesis associated, serine-rich 2-like	177.062	146.45	1.20761	0.27215	0.523915	1
ENSMUSG00000064294	Aox3	aldehyde oxidase 3	22.133	9.09889	2.29065	1.19576	0.150806	1
ENSMUSG00000051223	Bzw1	basic leucine zipper and W2 domains 1	958.388	933.329	1.02682	0.0381834	0.82426	1
ENSMUSG00000026035	Ppil3	peptidylprolyl isomerase (cyclophilin)-like 3	71.8813	57.4625	1.24663	0.318039	0.401612	1
ENSMUSG00000026036	Nif3l1	Ngg1 interacting factor 3-like 1 (S. pombe)	133.946	113.947	1.17398	0.231407	0.461815	1
ENSMUSG00000026037	Orc2	origin recognition complex, subunit 2	157.416	155.103	1.01482	0.021222	0.939363	1
ENSMUSG00000085054	Gm15834	predicted gene 15834	11.0823	10.0502	1.0934	0.128828	0.918875	1
ENSMUSG00000038174	Fam126b	family with sequence similarity 126, member B	431.173	396.674	1.08675	0.12002	0.695853	1
ENSMUSG00000026032	Ndufb3	NADH dehydrogenase (ubiquinone) 1 beta subcomplex 3	302.795	252.53	1.19826	0.260945	0.300273	1
ENSMUSG00000047528	Als2cr12	amyotrophic lateral sclerosis 2 (juvenile) chromosome region, candidate 12 (human)	26.0535	13.7627	1.83255	0.873855	0.237835	1
ENSMUSG00000026029	Casp8	caspase 8	524.42	487.696	1.07515	0.104533	0.771239	1
ENSMUSG00000026027	Stradb	STE20-related kinase adaptor beta	206.135	199.501	1.03309	0.0469634	0.787173	1
ENSMUSG00000079550	Mpp4	membrane protein, palmitoylated 4 (MAGUK p55 subfamily member 4)	16.4266	9.46837	1.66469	0.73525	0.486753	1
ENSMUSG00000026024	Als2	amyotrophic lateral sclerosis 2 (juvenile)	640.055	582.953	1.09779	0.134596	0.595419	1
ENSMUSG00000026021	Sumo1	small ubiquitin-like modifier 1	331.28	326.867	1.01346	0.019287	0.928586	1
ENSMUSG00000077358	Gm26293	predicted gene, 26293	2.81587	1.95038	1.29335	0.37111	0.820184	1
ENSMUSG00000089093	Snord11	small nucleolar RNA, C/D box 11	5.93955	3.49796	1.54282	0.625573	0.590304	1
ENSMUSG00000067336	Bmpr2	bone morphogenetic protein receptor, type II (serine/threonine kinase)	1463.65	1461.08	1.00176	0.00253139	0.979651	1
ENSMUSG00000026019	Wdr12	WD repeat domain 12	92.4956	64.2182	1.43358	0.519624	0.182055	1
ENSMUSG00000026017	Carf	calcium response factor	75.8335	67.769	1.11727	0.159977	0.790844	1
ENSMUSG00000049439	Cyp20a1	cytochrome P450, family 20, subfamily a, polypeptide 1	199.833	195.127	1.02399	0.0342084	0.891209	1
ENSMUSG00000026782	Abi2	abl-interactor 2	508.609	467.441	1.08788	0.121523	0.6576	1
ENSMUSG00000025969	Nrp2	neuropilin 2	492.8	364.603	1.35064	0.433648	0.136882	1
ENSMUSG00000025968	Ndufs1	NADH dehydrogenase (ubiquinone) Fe-S protein 1	2128.14	1865.94	1.14044	0.189592	0.38631	1
ENSMUSG00000025967	Eef1b2	eukaryotic translation elongation factor 1 beta 2	1356.22	1313.46	1.03254	0.0461943	0.829168	1
ENSMUSG00000064612	Gm26457	predicted gene, 26457	3.47455	1.59533	1.72408	0.785825	0.664776	1
ENSMUSG00000081643	Gm11605	predicted gene 11605	239.785	184.071	1.30104	0.379662	0.211866	1
ENSMUSG00000025961	4933402D24Rik	RIKEN cDNA 4933402D24 gene	6.42849	4.09156	1.45898	0.544963	0.667637	1
ENSMUSG00000086836	Gm13748	predicted gene 13748	14.111	12.0479	1.15812	0.211784	0.801411	1
ENSMUSG00000025956	Mettl21a	methyltransferase like 21A	57.1433	54.2028	1.05327	0.074871	0.979809	1
ENSMUSG00000087213	2810408I11Rik	RIKEN cDNA 2810408I11 gene	6.70464	3.77249	1.61438	0.690985	0.608613	1
ENSMUSG00000051344	Plekhm3	pleckstrin homology domain containing, family M, member 3	461.112	436.122	1.05717	0.0802095	0.897371	1
ENSMUSG00000084416	Rpl10a-ps1	ribosomal protein L10A, pseudogene 1	1099.45	1073.06	1.02457	0.0350242	0.821389	1
ENSMUSG00000055567	Unc80	unc-80, NALCN activator	5.31254	4.03169	1.25456	0.327176	0.841227	1
ENSMUSG00000026005	Rpe	ribulose-5-phosphate-3-epimerase	176.742	152.308	1.15939	0.21336	0.657183	1
ENSMUSG00000026004	Kansl1l	KAT8 regulatory NSL complex subunit 1-like	1049.45	957.349	1.09611	0.13239	0.544751	1
ENSMUSG00000026000	Lancl1	LanC (bacterial lantibiotic synthetase component C)-like 1	139.258	121.129	1.14845	0.199685	0.501243	1
ENSMUSG00000062209	Erbb4	erb-b2 receptor tyrosine kinase 4	1019.18	976.532	1.04363	0.0616101	0.783954	1
ENSMUSG00000083795	Gm15670	predicted gene 15670	23.971	18.5757	1.27561	0.35119	0.541415	1
ENSMUSG00000087514	Gm16076	predicted gene 16076	45.477	40.6045	1.11712	0.159778	0.7095	1
ENSMUSG00000025997	Ikzf2	IKAROS family zinc finger 2	188.391	150.063	1.25372	0.326215	0.241613	1
ENSMUSG00000026192	Atic	5-aminoimidazole-4-carboxamide ribonucleotide formyltransferase/IMP cyclohydrolase	187.902	168.451	1.11479	0.156773	0.565356	1
ENSMUSG00000026187	Xrcc5	X-ray repair complementing defective repair in Chinese hamster cells 5	426.885	334.458	1.27553	0.351093	0.238602	1
ENSMUSG00000046330	Rpl37a	ribosomal protein L37a	30.8568	24.1969	1.26431	0.338351	0.549195	1
ENSMUSG00000039323	Igfbp2	insulin-like growth factor binding protein 2	5.63173	4.75668	1.15201	0.20415	0.835944	1
ENSMUSG00000026185	Igfbp5	insulin-like growth factor binding protein 5	11071.6	9378.15	1.18055	0.239459	0.274674	1
ENSMUSG00000061815	Rufy4	RUN and FYVE domain containing 4	102.641	92.0359	1.11399	0.15573	0.759284	1
ENSMUSG00000026180	Cxcr2	chemokine (C-X-C motif) receptor 2	10.9443	7.25523	1.44687	0.532939	0.651268	1
ENSMUSG00000006299	Aamp	angio-associated migratory protein	1509.13	1314.5	1.14795	0.199065	0.40613	1
ENSMUSG00000026177	Slc11a1	solute carrier family 11 (proton-coupled divalent metal ion transporters), member 1	200.567	190.72	1.05136	0.0722527	0.930658	1
ENSMUSG00000026176	Ctdsp1	CTD (carboxy-terminal domain, RNA polymerase II, polypeptide A) small phosphatase 1	1090.86	1054.05	1.03489	0.0494752	0.818852	1
ENSMUSG00000065468	Mir26b	microRNA 26b	2.5714	2.34996	1.0661	0.0923436	0.894735	1
ENSMUSG00000026175	Vil1	villin 1	1066.64	919.192	1.16023	0.214415	0.472081	1
ENSMUSG00000026174	Cnot9	CCR4-NOT transcription complex, subunit 9	252.601	247.927	1.01878	0.0268364	0.931564	1
ENSMUSG00000026172	Bcs1l	BCS1-like (yeast)	98.3718	97.2396	1.01152	0.0165315	0.927076	1
ENSMUSG00000026171	Rnf25	ring finger protein 25	219.748	187.067	1.17377	0.231155	0.390877	1
ENSMUSG00000033276	Stk36	serine/threonine kinase 36	64.4002	52.3319	1.22629	0.294298	0.615325	1
ENSMUSG00000026170	Cyp27a1	cytochrome P450, family 27, subfamily a, polypeptide 1	417.218	346.107	1.20487	0.268873	0.408401	1
ENSMUSG00000047021	Cfap65	cilia and flagella associated protein 65	16.8635	2.67491	4.86094	2.28123	0.161077	1
ENSMUSG00000026162	Nhej1	nonhomologous end-joining factor 1	22.9501	19.572	1.16421	0.219349	0.833904	1
ENSMUSG00000026205	Slc23a3	solute carrier family 23 (nucleobase transporters), member 3	15.4284	12.9335	1.17906	0.237637	0.712865	1
ENSMUSG00000033159	Cnppd1	cyclin Pas1/PHO80 domain containing 1	467.777	439.518	1.06415	0.0896984	0.707791	1
ENSMUSG00000049339	Retreg2	reticulophagy regulator family member 2	888.061	756.545	1.17361	0.23095	0.380985	1
ENSMUSG00000026197	Zfand2b	zinc finger, AN1 type domain 2B	152.901	148.112	1.03211	0.0455991	0.86218	1
ENSMUSG00000026198	Abcb6	ATP-binding cassette, sub-family B (MDR/TAP), member 6	301.374	245.545	1.22645	0.294486	0.240469	1
ENSMUSG00000033124	Atg9a	autophagy related 9A	514.548	407.281	1.26273	0.336545	0.207154	1
ENSMUSG00000026199	Ankzf1	ankyrin repeat and zinc finger domain containing 1	414.793	404.162	1.02624	0.0373672	0.95662	1
ENSMUSG00000026201	Stk16	serine/threonine kinase 16	571.318	534.455	1.06884	0.0960509	0.728826	1
ENSMUSG00000026202	Tuba4a	tubulin, alpha 4A	702.896	522.203	1.34536	0.427992	0.0824985	1
ENSMUSG00000026209	Dnpep	aspartyl aminopeptidase	272.844	218.021	1.25031	0.322287	0.22872	1
ENSMUSG00000085653	Gm15179	predicted gene 15179	2.84754	1.95038	1.30408	0.383035	0.897999	1
ENSMUSG00000033021	Gmppa	GDP-mannose pyrophosphorylase A	205.453	164.347	1.24861	0.320321	0.342105	1
ENSMUSG00000032997	Chpf	chondroitin polymerizing factor	123.33	120.1	1.02667	0.0379738	0.858938	1
ENSMUSG00000026213	Stk11ip	serine/threonine kinase 11 interacting protein	240.305	235.402	1.02074	0.0296175	0.988826	1
ENSMUSG00000026235	Epha4	Eph receptor A4	229.479	220.43	1.04087	0.0577837	0.868336	1
ENSMUSG00000032908	Sgpp2	sphingosine-1-phosphate phosphotase 2	469.938	453.416	1.03636	0.051522	0.910728	1
ENSMUSG00000032883	Acsl3	acyl-CoA synthetase long-chain family member 3	337.541	274.945	1.22684	0.294951	0.251708	1
ENSMUSG00000079470	Utp14b	UTP14B small subunit processome component	342.534	341.773	1.00222	0.0032001	0.963962	1
ENSMUSG00000026248	Mrpl44	mitochondrial ribosomal protein L44	196.35	168.333	1.16545	0.220893	0.442201	1
ENSMUSG00000087008	Gm5530	predicted gene 5530	60.5862	45.7132	1.31839	0.398776	0.460869	1
ENSMUSG00000026150	Mff	mitochondrial fission factor	428.069	402.96	1.06216	0.0869967	0.709448	1
ENSMUSG00000026149	Tm4sf20	transmembrane 4 L six family member 20	9.99807	4.24637	2.09632	1.06786	0.469384	1
ENSMUSG00000038496	Slc19a3	solute carrier family 19, member 3	138.473	124.022	1.11559	0.157802	0.522377	1
ENSMUSG00000079140	Gm6374	predicted gene 6374	42.1519	40.7565	1.03342	0.0474229	0.77113	1
ENSMUSG00000064281	Rpl19-ps1	ribosomal protein L19, pseudogene 1	100.336	84.3645	1.1871	0.247444	0.497684	1
ENSMUSG00000089844	A530032D15Rik	RIKEN cDNA A530032D15Rik gene	8.61735	8.32893	1.03092	0.0439278	0.96526	1
ENSMUSG00000079457	Gm7609	predicted pseudogene 7609	6.07762	0.638132	4.32054	2.11121	0.179461	1
ENSMUSG00000090186	Gm7592	predicted gene 7592	2.70947	1.59533	1.42929	0.515294	0.819788	1
ENSMUSG00000090103	Gm16094	predicted gene 16094	5.31254	5.21256	1.01609	0.0230323	1	1
ENSMUSG00000073628	Gm10552	predicted gene 10552	8.54262	3.50973	2.11601	1.08135	0.487522	1
ENSMUSG00000090246	Gm17017	predicted gene 17017	8.95684	5.04875	1.6461	0.71905	0.646888	1
ENSMUSG00000026222	Sp100	nuclear antigen Sp100	804	734.427	1.0946	0.130406	0.83885	1
ENSMUSG00000026228	Htr2b	5-hydroxytryptamine (serotonin) receptor 2B	19.9758	11.7468	1.64557	0.718591	0.41587	1
ENSMUSG00000026234	Ncl	nucleolin	6799.17	6470.22	1.05083	0.0715335	0.799667	1
ENSMUSG00000073627	C130036L24Rik	RIKEN cDNA C130036L24 gene	8.68069	6.20574	1.34347	0.425963	0.793843	1
ENSMUSG00000026238	Ptma	prothymosin alpha	1369.29	1318.34	1.03862	0.0546651	0.82052	1
ENSMUSG00000053333	Dis3l2	DIS3 like 3'-5' exoribonuclease 2	302.177	293.333	1.03005	0.0427103	0.918113	1
ENSMUSG00000084106	Gm6136	predicted pseudogene 6136	873.831	825.778	1.05812	0.0815031	0.676095	1
ENSMUSG00000026254	Eif4e2	eukaryotic translation initiation factor 4E member 2	833.344	780.688	1.06736	0.0940498	0.686666	1
ENSMUSG00000026255	Efhd1	EF hand domain containing 1	754.539	721.421	1.04584	0.0646668	0.718726	1
ENSMUSG00000089821	Efhd1os	EF hand domain containing 1, opposite strand	17.6172	12.0929	1.42194	0.507858	0.558014	1
ENSMUSG00000048000	Gigyf2	GRB10 interacting GYF protein 2	2089.25	1949.84	1.07146	0.0995787	0.680861	1
ENSMUSG00000026259	Ngef	neuronal guanine nucleotide exchange factor	563.264	500.283	1.12564	0.170744	0.493924	1
ENSMUSG00000079434	Neu2	neuraminidase 2	68.1396	58.4804	1.16239	0.217097	0.737456	1
ENSMUSG00000089281	Scarna6	small Cajal body-specific RNA 6	197.4	191.117	1.0327	0.0464258	0.788468	1
ENSMUSG00000005501	Usp40	ubiquitin specific peptidase 40	545.407	534.437	1.02049	0.0292613	0.896536	1
ENSMUSG00000084195	Gm15372	predicted gene 15372	13.2598	13.0082	1.01796	0.0256846	0.914567	1
ENSMUSG00000081602	Gm15369	predicted gene 15369	8.32983	4.28235	1.76623	0.82067	0.63419	1
ENSMUSG00000082513	Gm15374	predicted gene 15374	11.3585	8.88377	1.25038	0.322369	0.75653	1
ENSMUSG00000082677	Gm15371	predicted gene 15371	24.1091	12.6293	1.84229	0.881501	0.247413	1
ENSMUSG00000089943	Ugt1a5	UDP glucuronosyltransferase 1 family, polypeptide A5	23.3757	23.2222	1.00634	0.00911122	0.979792	1
ENSMUSG00000081488	Gm15368	predicted gene 15368	6.94911	4.45515	1.45717	0.543173	0.604027	1
ENSMUSG00000083277	Gm15376	predicted gene 15376	7.82059	4.21083	1.69274	0.759361	0.535031	1
ENSMUSG00000081984	Dnajb3	DnaJ heat shock protein family (Hsp40) member B3	32.9165	7.39872	4.03829	2.01374	0.093456	1
ENSMUSG00000049866	Arl4c	ADP-ribosylation factor-like 4C	345.439	329.216	1.04913	0.0691912	0.815484	1
ENSMUSG00000055013	Agap1	ArfGAP with GTPase domain, ankyrin repeat and PH domain 1	1678.71	1650.15	1.01729	0.0247368	0.89516	1
ENSMUSG00000088371	Gm25180	predicted gene, 25180	10.3489	9.11377	1.12213	0.166236	1	1
ENSMUSG00000026301	Iqca	IQ motif containing with AAA domain	7.33165	2.33197	2.50052	1.32223	0.264379	1
ENSMUSG00000044337	Ackr3	atypical chemokine receptor 3	421.129	281.904	1.49213	0.577371	0.0290439	1
ENSMUSG00000034432	Cops8	COP9 signalosome subunit 8	253.47	247.585	1.02367	0.0337569	0.98702	1
ENSMUSG00000026304	Rab17	RAB17, member RAS oncogene family	330.759	288.732	1.14506	0.195417	0.484586	1
ENSMUSG00000083064	Gm7785	predicted gene 7785	60.6179	54.1191	1.1179	0.160797	0.798945	1
ENSMUSG00000026307	Scly	selenocysteine lyase	706.029	559.679	1.26102	0.334594	0.292634	1
ENSMUSG00000049515	Espnl	espin-like	7.01245	5.01588	1.33188	0.413468	0.815394	1
ENSMUSG00000007805	Twist2	twist basic helix-loop-helix transcription factor 2	10.487	8.67809	1.18691	0.247208	0.851614	1
ENSMUSG00000026313	Hdac4	histone deacetylase 4	443.196	437.365	1.0133	0.0190659	0.979402	1
ENSMUSG00000026260	Ndufa10	NADH dehydrogenase (ubiquinone) 1 alpha subcomplex 10	2056.12	1832.35	1.12205	0.166143	0.380017	1
ENSMUSG00000073616	Cops9	COP9 signalosome subunit 9	239.255	199.429	1.1987	0.261475	0.323011	1
ENSMUSG00000034220	Gpc1	glypican 1	207.783	158.583	1.30831	0.387699	0.279911	1
ENSMUSG00000047067	Dusp28	dual specificity phosphatase 28	59.3435	48.0838	1.2294	0.297952	0.512744	1
ENSMUSG00000026269	Rnpepl1	arginyl aminopeptidase (aminopeptidase B)-like 1	816.97	682.254	1.19717	0.259626	0.268848	1
ENSMUSG00000026270	Capn10	calpain 10	220.286	159.07	1.38244	0.467215	0.136431	1
ENSMUSG00000026273	Mterf4	mitochondrial transcription termination factor 4	178.879	156.029	1.14552	0.195999	0.614994	1
ENSMUSG00000026274	Pask	PAS domain containing serine/threonine kinase	29.0707	25.4915	1.13511	0.182829	0.778042	1
ENSMUSG00000026275	Ppp1r7	protein phosphatase 1, regulatory (inhibitor) subunit 7	415.914	358.292	1.16038	0.214593	0.374282	1
ENSMUSG00000034066	Farp2	FERM, RhoGEF and pleckstrin domain protein 2	473.872	418.99	1.13067	0.177184	0.531897	1
ENSMUSG00000026278	Bok	BCL2-related ovarian killer	45.6037	41.7656	1.08975	0.123994	0.939558	1
ENSMUSG00000073609	D2hgdh	D-2-hydroxyglutarate dehydrogenase	173.524	148.63	1.16637	0.222021	0.492182	1
ENSMUSG00000026285	Pdcd1	programmed cell death 1	21.2412	10.8188	1.88185	0.912151	0.335549	1
ENSMUSG00000081051	Gm15427	predicted pseudogene 15427	2647.02	2526.58	1.04765	0.067154	0.718994	1
ENSMUSG00000040710	St8sia4	ST8 alpha-N-acetyl-neuraminide alpha-2,8-sialyltransferase 4	311.585	297.684	1.04654	0.0656267	0.895241	1
ENSMUSG00000044757	Gm6430	predicted gene 6430	12.6759	10.8162	1.15739	0.210871	0.897532	1
ENSMUSG00000040648	Ppip5k2	diphosphoinositol pentakisphosphate kinase 2	467.19	436.144	1.07102	0.0989851	0.703844	1
ENSMUSG00000089782	Gm3531	predicted pseudogene 3531	481.036	404.696	1.18817	0.248743	0.331004	1
ENSMUSG00000082431	Tdpx-ps1	thioredoxin peroxidase, pseudogene 1	80.9762	67.9538	1.18886	0.249576	0.551495	1
ENSMUSG00000067017	Gm3608	predicted gene 3608	249.595	249.498	1.00039	0.000559854	0.927399	1
ENSMUSG00000076999	Gm22426	predicted gene, 22426	5.0364	1.06159	2.92803	1.54993	0.321775	1
ENSMUSG00000026321	Tnfrsf11a	tumor necrosis factor receptor superfamily, member 11a, NFKB activator	147.016	105.707	1.38712	0.472095	0.183576	1
ENSMUSG00000038866	Zcchc2	zinc finger, CCHC domain containing 2	635.055	589.214	1.07767	0.107914	0.646826	1
ENSMUSG00000044340	Phlpp1	PH domain and leucine rich repeat protein phosphatase 1	800.571	740.15	1.08152	0.113065	0.641348	1
ENSMUSG00000009907	Vps4b	vacuolar protein sorting 4B	692.984	605.498	1.14425	0.194399	0.480945	1
ENSMUSG00000092572	Serpinb10	serine (or cysteine) peptidase inhibitor, clade B (ovalbumin), member 10	27.0313	21.5599	1.24253	0.31328	0.681062	1
ENSMUSG00000037035	Inhbb	inhibin beta-B	44.85	42.2376	1.06042	0.0846355	0.929216	1
ENSMUSG00000004451	Ralb	v-ral simian leukemia viral oncogene B	597.034	559.215	1.06751	0.0942466	0.716959	1
ENSMUSG00000026383	Epb41l5	erythrocyte membrane protein band 4.1 like 5	976.245	951.786	1.02567	0.0365672	0.847475	1
ENSMUSG00000026384	Ptpn4	protein tyrosine phosphatase, non-receptor type 4	434.998	403.647	1.07748	0.107658	0.634937	1
ENSMUSG00000050777	Tmem37	transmembrane protein 37	164.972	113.418	1.45058	0.536629	0.0947709	1
ENSMUSG00000026385	Dbi	diazepam binding inhibitor	2752.73	2013.89	1.36669	0.450685	0.0537017	1
ENSMUSG00000026388	3110009E18Rik	RIKEN cDNA 3110009E18 gene	20.1886	14.6156	1.35689	0.440299	0.544159	1
ENSMUSG00000026389	Steap3	STEAP family member 3	66.9513	44.0512	1.50831	0.592935	0.187966	1
ENSMUSG00000003721	Insig2	insulin induced gene 2	273.032	245.846	1.11013	0.150734	0.574146	1
ENSMUSG00000026339	Ccdc93	coiled-coil domain containing 93	778.37	622.786	1.24942	0.321256	0.204702	1
ENSMUSG00000085857	Gm15392	predicted gene 15392	7.71419	2.57052	2.44059	1.28723	0.338862	1
ENSMUSG00000001674	Ddx18	DEAD (Asp-Glu-Ala-Asp) box polypeptide 18	99.9856	98.5379	1.01454	0.0208309	0.967922	1
ENSMUSG00000026342	Slc35f5	solute carrier family 35, member F5	265.712	252.326	1.05284	0.0742851	0.836957	1
ENSMUSG00000049690	Nckap5	NCK-associated protein 5	372.692	325.713	1.14379	0.193826	0.453686	1
ENSMUSG00000065687	Gm23734	predicted gene, 23734	101.194	74.9481	1.34558	0.428225	0.562067	1
ENSMUSG00000026348	Acmsd	amino carboxymuconate semialdehyde decarboxylase	1409.91	983.215	1.43354	0.519577	0.214462	1
ENSMUSG00000036104	Rab3gap1	RAB3 GTPase activating protein subunit 1	1248.06	1229.58	1.01501	0.0214992	0.839698	1
ENSMUSG00000058603	Rpl28-ps1	ribosomal protein L28, pseudogene 1	806.361	735.901	1.09562	0.131744	0.503391	1
ENSMUSG00000026355	Mcm6	minichromosome maintenance complex component 6	264.779	251.928	1.05081	0.0715022	0.72099	1
ENSMUSG00000026356	Dars	aspartyl-tRNA synthetase	628.887	596.325	1.05451	0.0765765	0.734558	1
ENSMUSG00000042581	Thsd7b	thrombospondin, type I, domain containing 7B	5.97123	2.88059	1.79643	0.845136	0.666849	1
ENSMUSG00000089648	Gm15790	predicted pseudogene 15790	68.7146	60.5313	1.13299	0.18014	0.719626	1
ENSMUSG00000026405	C4bp	complement component 4 binding protein	6.39682	1.29426	3.22406	1.68888	0.227644	1
ENSMUSG00000026409	Pfkfb2	6-phosphofructo-2-kinase/fructose-2,6-biphosphatase 2	493.586	483.528	1.02076	0.0296392	0.922478	1
ENSMUSG00000026417	Pigr	polymeric immunoglobulin receptor	1137.52	703.508	1.61605	0.692471	0.334867	1
ENSMUSG00000088705	Gm25549	predicted gene, 25549	11.9538	8.44277	1.37183	0.456097	0.644848	1
ENSMUSG00000016526	Dyrk3	dual-specificity tyrosine-(Y)-phosphorylation regulated kinase 3	14.3238	6.79346	1.96624	0.975439	0.338543	1
ENSMUSG00000026427	Eif2d	eukaryotic translation initiation factor 2D	366.931	355.694	1.0315	0.0447489	0.852913	1
ENSMUSG00000026430	Rassf5	Ras association (RalGDS/AF-6) domain family member 5	321.083	311.504	1.03065	0.0435553	0.933002	1
ENSMUSG00000004552	Ctse	cathepsin E	9.48883	4.81298	1.80438	0.851504	0.463287	1
ENSMUSG00000042251	Pm20d1	peptidase M20 domain containing 1	456.585	357.04	1.27803	0.353919	0.174049	1
ENSMUSG00000026436	Elk4	ELK4, member of ETS oncogene family	949.922	916.182	1.03679	0.0521195	0.832879	1
ENSMUSG00000059149	Mfsd4a	major facilitator superfamily domain containing 4A	1160.59	1076	1.07854	0.109086	0.567245	1
ENSMUSG00000026437	Cdk18	cyclin-dependent kinase 18	515.802	483.967	1.06564	0.0917264	0.741854	1
ENSMUSG00000042066	Tmcc2	transmembrane and coiled-coil domains 2	176.385	169.279	1.04173	0.0589844	0.894275	1
ENSMUSG00000026439	Rbbp5	retinoblastoma binding protein 5, histone lysine methyltransferase complex subunit	475.638	469.181	1.01373	0.0196765	0.990149	1
ENSMUSG00000048174	Tmem81	transmembrane protein 81	28.8807	22.5296	1.26992	0.344734	0.516157	1
ENSMUSG00000053024	Cntn2	contactin 2	12.9203	8.36491	1.48643	0.571856	0.592691	1
ENSMUSG00000026447	Pik3c2b	phosphatidylinositol-4-phosphate 3-kinase catalytic subunit type 2 beta	208.697	182.135	1.14504	0.195404	0.547236	1
ENSMUSG00000046062	Ppp1r15b	protein phosphatase 1, regulatory (inhibitor) subunit 15b	1388.77	1310.42	1.05975	0.0837216	0.704335	1
ENSMUSG00000090553	Snrpe	small nuclear ribonucleoprotein E	40.0264	38.9673	1.0265	0.0377331	0.836508	1
ENSMUSG00000064246	Chil1	chitinase-like 1	8.51095	5.41824	1.48186	0.567412	0.657259	1
ENSMUSG00000042451	Mybph	myosin binding protein H	7.33165	2.26045	2.55537	1.35353	0.32594	1
ENSMUSG00000042429	Adora1	adenosine A1 receptor	155.259	136.327	1.13787	0.18633	0.596247	1
ENSMUSG00000026458	Ppfia4	protein tyrosine phosphatase, receptor type, f polypeptide (PTPRF), interacting protein (liprin), alpha 4	32.1741	26.3202	1.21427	0.280088	0.719505	1
ENSMUSG00000042305	Tmem183a	transmembrane protein 183A	574.421	547.369	1.04933	0.0694711	0.816339	1
ENSMUSG00000026456	Cyb5r1	cytochrome b5 reductase 1	230.575	219.35	1.05094	0.0716776	0.766386	1
ENSMUSG00000026455	Klhl12	kelch-like 12	269.163	254.239	1.05847	0.0819858	0.738812	1
ENSMUSG00000042229	Rabif	RAB interacting factor	125.561	99.2809	1.26207	0.335791	0.361575	1
ENSMUSG00000026426	Arl8a	ADP-ribosylation factor-like 8A	470.644	432.422	1.08819	0.121926	0.653501	1
ENSMUSG00000062580	Timm17a	translocase of inner mitochondrial membrane 17a	229.522	221.108	1.03788	0.0536446	0.764402	1
ENSMUSG00000041879	Ipo9	importin 9	862.608	833.259	1.03518	0.0498814	0.830332	1
ENSMUSG00000041801	Phlda3	pleckstrin homology like domain, family A, member 3	42.1519	33.8296	1.23894	0.309111	0.545923	1
ENSMUSG00000041782	Lad1	ladinin	1583.08	1571.21	1.00755	0.0108512	0.914246	1
ENSMUSG00000051985	Igfn1	immunoglobulin-like and fibronectin type III domain containing 1	24.8197	10.7212	2.20282	1.13935	0.521428	1
ENSMUSG00000026411	Tmem9	transmembrane protein 9	224.995	201.335	1.11694	0.159546	0.548745	1
ENSMUSG00000041570	Camsap2	calmodulin regulated spectrin-associated protein family, member 2	1691.52	1677.38	1.00842	0.0121031	0.931373	1
ENSMUSG00000079283	2310009B15Rik	RIKEN cDNA 2310009B15 gene	31.5585	27.1523	1.15651	0.209782	0.696452	1
ENSMUSG00000085361	Gm16305	predicted gene 16305	6.70464	3.89177	1.57502	0.655372	0.668042	1
ENSMUSG00000033964	Zbtb41	zinc finger and BTB domain containing 41	879.834	825.818	1.06533	0.091299	0.63866	1
ENSMUSG00000033952	Aspm	asp (abnormal spindle)-like, microcephaly associated (Drosophila)	83.3665	58.3769	1.42086	0.506769	0.50538	1
ENSMUSG00000018196	Glrx2	glutaredoxin 2 (thioltransferase)	217.652	196.818	1.10532	0.144459	0.664468	1
ENSMUSG00000018189	Uchl5	ubiquitin carboxyl-terminal esterase L5	217.194	197.056	1.10168	0.139709	0.605517	1
ENSMUSG00000026358	Rgs1	regulator of G-protein signaling 1	573.566	524.709	1.09293	0.128207	0.856495	1
ENSMUSG00000090323	Gm5263	predicted gene 5263	3.96349	3.42055	1.12282	0.16713	0.795181	1
ENSMUSG00000066842	Hmcn1	hemicentin 1	91.5583	69.3454	1.31577	0.395905	0.458273	1
ENSMUSG00000023150	Ivns1abp	influenza virus NS1A binding protein	6049.48	5194.18	1.16463	0.219875	0.313197	1
ENSMUSG00000052748	Swt1	SWT1 RNA endoribonuclease homolog (S. cerevisiae)	538.904	480.032	1.12239	0.16657	0.523837	1
ENSMUSG00000053286	Trmt1l	tRNA methyltransferase 1 like	338.953	334.843	1.01224	0.0175482	0.92518	1
ENSMUSG00000026483	Fam129a	family with sequence similarity 129, member A	994.61	946.619	1.05064	0.0712735	0.86645	1
ENSMUSG00000014980	Tsen15	tRNA splicing endonuclease subunit 15	100.986	80.2935	1.25454	0.327162	0.380883	1
ENSMUSG00000032649	Colgalt2	collagen beta(1-O)galactosyltransferase 2	278.148	213.959	1.29861	0.37697	0.203984	1
ENSMUSG00000008475	Arpc5	actin related protein 2/3 complex, subunit 5	605.873	547.384	1.10666	0.146208	0.588256	1
ENSMUSG00000026478	Lamc1	laminin, gamma 1	1473.18	1423.35	1.03498	0.0496059	0.811636	1
ENSMUSG00000079138	Gm8818	predicted pseudogene 8818	46.9008	26.7644	1.72526	0.786815	0.178893	1
ENSMUSG00000042708	Shcbp1l	Shc SH2-domain binding protein 1-like	11.741	9.75457	1.18471	0.244533	0.832289	1
ENSMUSG00000042684	Npl	N-acetylneuraminate pyruvate lyase	219.97	139.385	1.57403	0.65446	0.0721477	1
ENSMUSG00000026475	Rgs16	regulator of G-protein signaling 16	93.367	58.5526	1.5846	0.664118	0.19975	1
ENSMUSG00000066800	Rnasel	ribonuclease L (2', 5'-oligoisoadenylate synthetase-dependent)	209.779	165.068	1.26924	0.343963	0.447248	1
ENSMUSG00000045968	Teddm2	transmembrane epididymal family member 2	8.37288	5.65401	1.40861	0.494267	0.654218	1
ENSMUSG00000066797	Zfp648	zinc finger protein 648	41.8847	16.4494	2.45766	1.29728	0.0396498	1
ENSMUSG00000033722	BC034090	cDNA sequence BC034090	1359.98	1279.38	1.06295	0.0880739	0.741166	1
ENSMUSG00000026469	Xpr1	xenotropic and polytropic retrovirus receptor 1	1321.54	1318.08	1.00263	0.00378272	0.954382	1
ENSMUSG00000033701	Acbd6	acyl-Coenzyme A binding domain containing 6	186.467	169.258	1.10108	0.138915	0.626659	1
ENSMUSG00000026466	Tor1aip1	torsin A interacting protein 1	808.174	778.282	1.03836	0.0543041	0.8511	1
ENSMUSG00000060985	Tdrd5	tudor domain containing 5	42.5231	33.5168	1.26092	0.33448	0.617187	1
ENSMUSG00000078193	Gm2000	predicted gene 2000	1184.4	1073.97	1.10273	0.141085	0.466451	1
ENSMUSG00000026600	Soat1	sterol O-acyltransferase 1	556.888	496.358	1.1217	0.16569	0.557285	1
ENSMUSG00000060519	Tor3a	torsin family 3, member A	313.038	259.162	1.20708	0.271526	0.410113	1
ENSMUSG00000033557	Fam20b	family with sequence similarity 20, member B	1153.23	1012.76	1.13855	0.187204	0.421745	1
ENSMUSG00000026594	Ralgps2	Ral GEF with PH domain and SH3 binding motif 2	215.379	187.603	1.14727	0.198211	0.484472	1
ENSMUSG00000033544	Angptl1	angiopoietin-like 1	14.206	12.3039	1.14298	0.192798	0.802695	1
ENSMUSG00000070565	Rasal2	RAS protein activator like 2	797.707	777.309	1.02621	0.0373232	0.999405	1
ENSMUSG00000049881	2810025M15Rik	RIKEN cDNA 2810025M15 gene	72.4133	60.7968	1.18798	0.248509	0.54931	1
ENSMUSG00000033488	BC026585	cDNA sequence BC026585	1056.01	872.473	1.21012	0.275154	0.414813	1
ENSMUSG00000026589	Sec16b	SEC16 homolog B (S. cerevisiae)	42.8195	24.9728	1.68713	0.754572	0.33515	1
ENSMUSG00000026587	Astn1	astrotactin 1	52.5869	47.8332	1.09735	0.13402	0.660562	1
ENSMUSG00000073530	Pappa2	pappalysin 2	81.1598	46.0848	1.74493	0.803172	0.246956	1
ENSMUSG00000040782	Rfwd2	ring finger and WD repeat domain 2	212.584	188.572	1.12666	0.172054	0.566855	1
ENSMUSG00000089536	Scarna3a	small Cajal body-specific RNA 3A	8.02201	7.53865	1.05661	0.0794413	0.939809	1
ENSMUSG00000058267	Mrps14	mitochondrial ribosomal protein S14	238.83	206.581	1.15536	0.208337	0.426647	1
ENSMUSG00000026721	Rabgap1l	RAB GTPase activating protein 1-like	1281.92	1181.28	1.08512	0.117855	0.53238	1
ENSMUSG00000053332	Gas5	growth arrest specific 5	303.644	302.99	1.00215	0.00309983	0.965255	1
ENSMUSG00000026709	Dars2	aspartyl-tRNA synthetase 2 (mitochondrial)	189.24	184.344	1.02641	0.0376128	0.940363	1
ENSMUSG00000026701	Prdx6	peroxiredoxin 6	1017.14	867.981	1.17164	0.228534	0.300384	1
ENSMUSG00000040323	Gm15429	predicted pseudogene 15429	174.257	147.22	1.18241	0.241731	0.41368	1
ENSMUSG00000026698	Pigc	phosphatidylinositol glycan anchor biosynthesis, class C	136.017	113.087	1.20098	0.264215	0.404329	1
ENSMUSG00000026694	Mettl13	methyltransferase like 13	122.596	110.42	1.10928	0.149627	0.65287	1
ENSMUSG00000040170	Fmo2	flavin containing monooxygenase 2	2918.13	2035.43	1.43345	0.519495	0.0225837	1
ENSMUSG00000026691	Fmo3	flavin containing monooxygenase 3	5.38726	3.76349	1.34088	0.423178	0.729081	1
ENSMUSG00000040124	Gorab	golgin, RAB6-interacting	74.867	74.5026	1.00483	0.00694557	0.992068	1
ENSMUSG00000026585	Kifap3	kinesin-associated protein 3	568.778	384.682	1.47733	0.562987	0.0393849	1
ENSMUSG00000041396	Mettl18	methyltransferase like 18	27.3708	26.9739	1.01419	0.0203255	1	1
ENSMUSG00000026579	F5	coagulation factor V	299.968	274.096	1.09405	0.129677	0.598973	1
ENSMUSG00000040918	Slc19a2	solute carrier family 19 (thiamine transporter), member 2	143.19	115.244	1.24041	0.310813	0.317216	1
ENSMUSG00000026578	Ccdc181	coiled-coil domain containing 181	470.026	392.379	1.19739	0.259889	0.337631	1
ENSMUSG00000026577	Blzf1	basic leucine zipper nuclear factor 1	343.501	315.57	1.08823	0.121984	0.675928	1
ENSMUSG00000026576	Atp1b1	ATPase, Na+/K+ transporting, beta 1 polypeptide	25050.8	24693.8	1.01446	0.0207093	0.86196	1
ENSMUSG00000026573	Xcl1	chemokine (C motif) ligand 1	17.692	16.7708	1.05184	0.0729098	0.844594	1
ENSMUSG00000040848	Sft2d2	SFT2 domain containing 2	1136.89	1002.62	1.13378	0.181143	0.413303	1
ENSMUSG00000040843	Tiprl	TIP41, TOR signalling pathway regulator-like (S. cerevisiae)	243.388	234.797	1.03644	0.0516321	0.786571	1
ENSMUSG00000026571	Dcaf6	DDB1 and CUL4 associated factor 6	979.466	833.986	1.17423	0.231716	0.350878	1
ENSMUSG00000026568	Mpc2	mitochondrial pyruvate carrier 2	1361.42	1113.72	1.2222	0.289482	0.189552	1
ENSMUSG00000026567	Adcy10	adenylate cyclase 10	16.5013	12.0416	1.34196	0.424345	0.611057	1
ENSMUSG00000026566	Mpzl1	myelin protein zero-like 1	316.642	285.595	1.10833	0.148388	0.588503	1
ENSMUSG00000040713	Creg1	cellular repressor of E1A-stimulated genes 1	731.306	601.629	1.21519	0.281176	0.258459	1
ENSMUSG00000026564	Dusp27	dual specificity phosphatase 27 (putative)	10.9443	8.89554	1.20704	0.271469	0.848244	1
ENSMUSG00000040612	Ildr2	immunoglobulin-like domain containing receptor 2	960.382	821.881	1.16831	0.224425	0.409833	1
ENSMUSG00000026563	Tada1	transcriptional adaptor 1	154.929	137.545	1.12547	0.170533	0.675397	1
ENSMUSG00000089853	Gm15853	predicted gene 15853	7.0555	3.7545	1.69429	0.760682	0.521154	1
ENSMUSG00000084093	Gm16418	predicted pseudogene 16418	454.727	431.213	1.0544	0.0764279	0.681025	1
ENSMUSG00000086925	Gm6286	predicted gene 6286	2.84754	1.83111	1.35902	0.442571	0.811192	1
ENSMUSG00000060568	Fam78b	family with sequence similarity 78, member B	22.5472	19.9596	1.12346	0.167948	0.820398	1
ENSMUSG00000026558	Uck2	uridine-cytidine kinase 2	80.7545	74.7861	1.07875	0.109365	0.780153	1
ENSMUSG00000052428	Tmco1	transmembrane and coiled-coil domains 1	1458.48	1337.89	1.09006	0.124408	0.666406	1
ENSMUSG00000026687	Aldh9a1	aldehyde dehydrogenase 9, subfamily A1	2160.87	1882.73	1.14765	0.198682	0.506837	1
ENSMUSG00000026688	Mgst3	microsomal glutathione S-transferase 3	405.68	282.239	1.43582	0.521878	0.0947072	1
ENSMUSG00000015843	Rxrg	retinoid X receptor gamma	9.44578	4.9056	1.76879	0.822764	0.454457	1
ENSMUSG00000052534	Pbx1	pre B cell leukemia homeobox 1	2195.94	1943.88	1.1296	0.175815	0.482323	1
ENSMUSG00000026675	Hsd17b7	hydroxysteroid (17-beta) dehydrogenase 7	161.987	146.073	1.1082	0.148219	0.530835	1
ENSMUSG00000026667	Uhmk1	U2AF homology motif (UHM) kinase 1	1604.95	1535.99	1.04487	0.0633226	0.711577	1
ENSMUSG00000026659	Dusp12	dual specificity phosphatase 12	39.7072	32.2431	1.22453	0.292228	0.561619	1
ENSMUSG00000070524	Fcrlb	Fc receptor-like B	3.09201	3.00609	1.02145	0.0306164	0.957452	1
ENSMUSG00000089838	Gm2962	predicted pseudogene 2962	241.537	215.095	1.12236	0.166539	0.680793	1
ENSMUSG00000026649	Cfap126	cilia and flagella associated protein 126	32.3008	11.5857	2.64593	1.40378	0.0559683	1
ENSMUSG00000058076	Sdhc	succinate dehydrogenase complex, subunit C, integral membrane protein	1117.16	863.676	1.29315	0.370892	0.119799	1
ENSMUSG00000005677	Nr1i3	nuclear receptor subfamily 1, group I, member 3	7.92699	6.57879	1.17789	0.236207	0.75545	1
ENSMUSG00000005674	Tomm40l	translocase of outer mitochondrial membrane 40 homolog-like (yeast)	53.2862	23.4698	2.2185	1.14959	0.0524284	1
ENSMUSG00000005681	Apoa2	apolipoprotein A-II	19.5186	11.9047	1.59	0.669029	0.453409	1
ENSMUSG00000058715	Fcer1g	Fc receptor, IgE, high affinity I, gamma polypeptide	216.771	181.321	1.19444	0.256333	0.618181	1
ENSMUSG00000013593	Ndufs2	NADH dehydrogenase (ubiquinone) Fe-S protein 2	3083.68	2642.86	1.16673	0.222474	0.345807	1
ENSMUSG00000062729	Ppox	protoporphyrinogen oxidase	241.453	200.415	1.20375	0.26753	0.428304	1
ENSMUSG00000053483	Usp21	ubiquitin specific peptidase 21	205.623	192.504	1.0678	0.094642	0.703613	1
ENSMUSG00000013973	Dedd	death effector domain-containing	64.7739	59.8784	1.08041	0.111584	0.779063	1
ENSMUSG00000045259	Klhdc9	kelch domain containing 9	21.0804	18.5664	1.12849	0.174391	0.90162	1
ENSMUSG00000048865	Arhgap30	Rho GTPase activating protein 30	522.783	455.598	1.14714	0.198046	0.725051	1
ENSMUSG00000038235	F11r	F11 receptor	737.82	660.011	1.11771	0.16055	0.539019	1
ENSMUSG00000060244	Alyref2	Aly/REF export factor 2	14.0793	12.6324	1.10614	0.145535	0.723749	1
ENSMUSG00000059058	Tma7-ps	translational machinery associated 7 homolog (S. cerevisiae), pseudogene	218.075	169.583	1.28427	0.360949	0.276396	1
ENSMUSG00000026556	Vangl2	vang-like 2 (van gogh, Drosophila)	103.057	79.2971	1.2959	0.373958	0.337853	1
ENSMUSG00000003458	Ncstn	nicastrin	632.018	514.974	1.22684	0.294947	0.238418	1
ENSMUSG00000003464	Pex19	peroxisomal biogenesis factor 19	538.332	505.82	1.06415	0.0896977	0.687879	1
ENSMUSG00000026554	Dcaf8	DDB1 and CUL4 associated factor 8	3040.34	2720.09	1.11769	0.160521	0.481822	1
ENSMUSG00000092085	Gm17224	predicted gene 17224	2.5714	1.93239	1.21791	0.284412	0.90118	1
ENSMUSG00000038034	Igsf8	immunoglobulin superfamily, member 8	200.014	153.293	1.30281	0.381622	0.242398	1
ENSMUSG00000038026	Kcnj9	potassium inwardly-rectifying channel, subfamily J, member 9	10.3489	4.21983	2.1742	1.12048	0.395166	1
ENSMUSG00000026548	Slamf9	SLAM family member 9	139.652	100.597	1.38441	0.469275	0.332247	1
ENSMUSG00000037995	Igsf9	immunoglobulin superfamily, member 9	126.911	108.902	1.16386	0.218917	0.634615	1
ENSMUSG00000037849	Ifi206	interferon activated gene 206	45.7848	41.4507	1.1021	0.140251	0.886984	1
ENSMUSG00000073491	Ifi213	interferon activated gene 213	118.984	92.1481	1.28809	0.365239	0.3449	1
ENSMUSG00000066677	Ifi208	interferon activated gene 208	64.0291	55.024	1.16074	0.21504	0.676375	1
ENSMUSG00000073489	Ifi204	interferon activated gene 204	177.392	155.226	1.14189	0.191418	0.688612	1
ENSMUSG00000090222	Ifi203-ps	interferon activated gene 203, pseudogene	98.976	87.0116	1.13594	0.183889	0.837915	1
ENSMUSG00000026536	Ifi211	interferon activated gene 211	55.3801	50.6301	1.092	0.126971	0.831922	1
ENSMUSG00000026535	Ifi202b	interferon activated gene 202B	45.2212	41.9404	1.0764	0.106218	1	1
ENSMUSG00000054203	Ifi205	interferon activated gene 205	25.6392	22.2821	1.14419	0.194332	0.734339	1
ENSMUSG00000026532	Spta1	spectrin alpha, erythrocytic 1	5.72676	3.08938	1.64493	0.718029	0.722753	1
ENSMUSG00000028354	Fmn2	formin 2	3.61263	2.57052	1.29186	0.369453	0.879906	1
ENSMUSG00000050069	Grem2	gremlin 2, DAN family BMP antagonist	55.9754	32.3136	1.71027	0.774226	0.249132	1
ENSMUSG00000026527	Rgs7	regulator of G protein signaling 7	3.71902	1.71772	1.73639	0.796094	0.596442	1
ENSMUSG00000026526	Fh1	fumarate hydratase 1	1231.74	1057.68	1.16441	0.219603	0.281001	1
ENSMUSG00000039783	Kmo	kynurenine 3-monooxygenase (kynurenine 3-hydroxylase)	685.112	501.832	1.36449	0.448365	0.0654135	1
ENSMUSG00000026525	Opn3	opsin 3	35.4789	28.2229	1.2483	0.319966	0.594829	1
ENSMUSG00000078184	Rbm8a2	RNA binding motif protein 8A2	155.311	116.119	1.33463	0.41644	0.258527	1
ENSMUSG00000089657	Gm16585	predicted gene 16585	5.52534	2.66003	1.78286	0.834196	0.484242	1
ENSMUSG00000026502	Desi2	desumoylating isopeptidase 2	211.045	175.704	1.2	0.263033	0.360271	1
ENSMUSG00000086350	B230369F24Rik	RIKEN cDNA B230369F24 gene	28.4665	27.8142	1.02264	0.0322962	0.842981	1
ENSMUSG00000055067	Smyd3	SET and MYND domain containing 3	201.064	163.168	1.23084	0.299642	0.418679	1
ENSMUSG00000038936	Sccpdh	saccharopine dehydrogenase (putative)	129.686	86.0666	1.50099	0.585911	0.0878807	1
ENSMUSG00000087236	Kif28	kinesin family member 28	3.36815	2.6245	1.20518	0.269243	0.959336	1
ENSMUSG00000026489	Coq8a	coenzyme Q8A	1243.41	932.443	1.33314	0.414832	0.112872	1
ENSMUSG00000010609	Psen2	presenilin 2	167.064	150.558	1.10891	0.149138	0.715031	1
ENSMUSG00000026496	Parp1	poly (ADP-ribose) polymerase family, member 1	776.84	763.157	1.01791	0.0256037	0.914372	1
ENSMUSG00000026499	Acbd3	acyl-Coenzyme A binding domain containing 3	770.748	732.636	1.05195	0.073066	0.817468	1
ENSMUSG00000060743	H3f3a	H3 histone, family 3A	184.14	177.031	1.03993	0.0564912	0.912516	1
ENSMUSG00000026520	Pycr2	pyrroline-5-carboxylate reductase family, member 2	90.4334	82.9007	1.08978	0.124038	0.767384	1
ENSMUSG00000026519	Tmem63a	transmembrane protein 63a	187.329	168.021	1.11423	0.156052	0.548722	1
ENSMUSG00000038776	Ephx1	epoxide hydrolase 1, microsomal	828.046	799.845	1.03521	0.0499285	0.818968	1
ENSMUSG00000062169	Cnih4	cornichon family AMPA receptor auxiliary protein 4	370.011	267.066	1.38403	0.468875	0.076366	1
ENSMUSG00000054135	A430110L20Rik	RIKEN cDNA A430110L20 gene	19.625	15.8923	1.22097	0.288022	0.80762	1
ENSMUSG00000081214	Rpl35a-ps2	ribosomal protein L35A, pseudogene 2	137.973	136.168	1.01315	0.0188519	0.841162	1
ENSMUSG00000089429	Gm26004	predicted gene, 26004	6.56656	5.27242	1.20632	0.270615	0.87659	1
ENSMUSG00000022995	Enah	enabled homolog (Drosophila)	951.56	944.085	1.00791	0.0113661	1	1
ENSMUSG00000038633	Degs1	delta(4)-desaturase, sphingolipid 1	736.492	714.146	1.03125	0.0443893	0.811379	1
ENSMUSG00000079164	Tlr5	toll-like receptor 5	15.7362	12.6738	1.22396	0.291558	0.70964	1
ENSMUSG00000039377	Hlx	H2.0-like homeobox	261.431	191.189	1.36549	0.449417	0.172748	1
ENSMUSG00000073481	Marc2	mitochondrial amidoxime reducing component 2	1611.38	1392.49	1.15709	0.210495	0.352588	1
ENSMUSG00000026618	Iars2	isoleucine-tRNA synthetase 2, mitochondrial	993.169	949.795	1.04562	0.0643566	0.774652	1
ENSMUSG00000026617	Bpnt1	bisphosphate 3'-nucleotidase 1	1583.94	1389.63	1.13973	0.188694	0.431515	1
ENSMUSG00000026615	Eprs	glutamyl-prolyl-tRNA synthetase	1982.36	1969.98	1.00628	0.00903429	0.986469	1
ENSMUSG00000039239	Tgfb2	transforming growth factor, beta 2	182.325	113.685	1.59851	0.676725	0.22617	1
ENSMUSG00000001305	Rrp15	ribosomal RNA processing 15 homolog (S. cerevisiae)	112.895	81.8418	1.37484	0.459268	0.258924	1
ENSMUSG00000026611	Spata17	spermatogenesis associated 17	28.5932	22.3959	1.26489	0.339007	0.576338	1
ENSMUSG00000026610	Esrrg	estrogen-related receptor gamma	1008.96	848.558	1.18881	0.249521	0.266112	1
ENSMUSG00000026609	Ush2a	usherin	4.13324	3.18789	1.22574	0.293648	0.788679	1
ENSMUSG00000026608	Kctd3	potassium channel tetramerisation domain containing 3	289.418	251.381	1.15071	0.202524	0.467048	1
ENSMUSG00000037624	Kcnk2	potassium channel, subfamily K, member 2	20.3267	15.2057	1.316	0.396162	0.628703	1
ENSMUSG00000026604	Ptpn14	protein tyrosine phosphatase, non-receptor type 14	1063.32	1046.66	1.01591	0.0227698	0.999967	1
ENSMUSG00000026603	Smyd2	SET and MYND domain containing 2	242.535	150.185	1.61084	0.687814	0.0413979	1
ENSMUSG00000010175	Prox1	prospero homeobox 1	358.556	306.145	1.17064	0.227296	0.39685	1
ENSMUSG00000089872	Rps6kc1	ribosomal protein S6 kinase polypeptide 1	277.654	231.224	1.19994	0.26296	0.417398	1
ENSMUSG00000026634	Angel2	angel homolog 2	385.995	314.45	1.2268	0.294904	0.23213	1
ENSMUSG00000037568	Vash2	vasohibin 2	7.33165	7.19582	1.01657	0.0237144	1	1
ENSMUSG00000026632	Tatdn3	TatD DNase domain containing 3	100.995	63.7677	1.57478	0.655153	0.106364	1
ENSMUSG00000073478	D730003I15Rik	RIKEN cDNA D730003I15 gene	26.3727	24.1817	1.087	0.120358	0.879525	1
ENSMUSG00000026627	Tmem206	transmembrane protein 206	279.65	215.13	1.29853	0.376878	0.238085	1
ENSMUSG00000026626	Ppp2r5a	protein phosphatase 2, regulatory subunit B', alpha	1141.83	1123.43	1.01636	0.0234139	0.905334	1
ENSMUSG00000037474	Dtl	denticleless E3 ubiquitin protein ligase	5.31254	4.67571	1.1122	0.153419	1	1
ENSMUSG00000064845	Gm26203	predicted gene, 26203	5.58868	0.984186	3.3206	1.73144	0.33097	1
ENSMUSG00000055833	1700034H15Rik	RIKEN cDNA 1700034H15 gene	32.3756	27.2337	1.18212	0.241374	0.83028	1
ENSMUSG00000037434	Slc30a1	solute carrier family 30 (zinc transporter), member 1	546.722	546.026	1.00127	0.00183485	0.990826	1
ENSMUSG00000026637	Traf5	TNF receptor-associated factor 5	131.343	121.33	1.08185	0.113498	0.750333	1
ENSMUSG00000037375	Hhat	hedgehog acyltransferase	43.4262	24.9962	1.70895	0.773109	0.203402	1
ENSMUSG00000016262	Sertad4	SERTA domain containing 4	40.5787	33.5131	1.20472	0.268702	0.536705	1
ENSMUSG00000016181	Diexf	digestive organ expansion factor homolog (zebrafish)	182.535	175.564	1.03948	0.0558629	0.888815	1
ENSMUSG00000026639	Lamb3	laminin, beta 3	38.3695	35.1066	1.09037	0.124816	0.757171	1
ENSMUSG00000016179	Camk1g	calcium/calmodulin-dependent protein kinase I gamma	47.2947	24.9992	1.85754	0.893396	0.0737115	1
ENSMUSG00000016494	Cd34	CD34 antigen	538.592	404.846	1.32955	0.410937	0.193124	1
ENSMUSG00000016481	Cr1l	complement component (3b/4b) receptor 1-like	177.51	154.065	1.1512	0.203135	0.520733	1
ENSMUSG00000015202	Cnksr3	Cnksr family member 3	363.827	311.959	1.16573	0.221239	0.449406	1
ENSMUSG00000081926	Gm15536	predicted gene 15536	314.355	249.348	1.25967	0.333042	0.190012	1
ENSMUSG00000019774	Mtrf1l	mitochondrial translational release factor 1-like	202.448	171.703	1.17802	0.236364	0.463632	1
ENSMUSG00000019773	Fbxo5	F-box protein 5	18.1695	17.66	1.0273	0.038863	0.993186	1
ENSMUSG00000046916	Myct1	myc target 1	162.709	121.911	1.33193	0.413518	0.3798	1
ENSMUSG00000019763	Rmnd1	required for meiotic nuclear division 1 homolog	219.628	216.904	1.0125	0.0179198	0.992151	1
ENSMUSG00000085687	Gm16153	predicted gene 16153	71.6255	69.9137	1.02414	0.0344112	0.984472	1
ENSMUSG00000082247	Gm16074	predicted gene 16074	5.72676	1.31225	2.90918	1.54061	0.458628	1
ENSMUSG00000019762	Iyd	iodotyrosine deiodinase	524.648	376.11	1.39388	0.479111	0.159088	1
ENSMUSG00000040653	Ppp1r14c	protein phosphatase 1, regulatory (inhibitor) subunit 14c	6.49184	1.59533	2.88666	1.5294	0.370956	1
ENSMUSG00000019796	Lrp11	low density lipoprotein receptor-related protein 11	81.3271	78.6904	1.03309	0.0469613	0.827228	1
ENSMUSG00000019795	Pcmt1	protein-L-isoaspartate (D-aspartate) O-methyltransferase 1	367.619	354.616	1.03656	0.0518101	0.832623	1
ENSMUSG00000040034	Nup43	nucleoporin 43	39.336	29.6692	1.3152	0.395281	0.452104	1
ENSMUSG00000081497	Gm15560	predicted gene 15560	4.37771	3.22076	1.27411	0.349489	0.793411	1
ENSMUSG00000039981	Zc3h12d	zinc finger CCCH type containing 12D	68.2573	61.1592	1.11419	0.155999	0.83486	1
ENSMUSG00000064609	Gm25635	predicted gene, 25635	5.20614	3.85301	1.27882	0.354818	0.845622	1
ENSMUSG00000050994	Adgb	androglobin	14.1857	11.9736	1.17051	0.227138	0.742001	1
ENSMUSG00000019832	Rab32	RAB32, member RAS oncogene family	73.8485	71.0495	1.03885	0.0549847	0.78367	1
ENSMUSG00000090112	Shprh	SNF2 histone linker PHD RING helicase	687.183	659.234	1.04233	0.0598143	0.802352	1
ENSMUSG00000055493	Epm2a	epilepsy, progressive myoclonic epilepsy, type 2 gene alpha	163.992	130.75	1.25231	0.324594	0.448077	1
ENSMUSG00000045455	Gm9797	predicted pseudogene 9797	21.6758	14.6899	1.44524	0.531311	0.537764	1
ENSMUSG00000078348	Sf3b5	splicing factor 3b, subunit 5	131.245	108.618	1.20642	0.270729	0.441823	1
ENSMUSG00000019814	Ltv1	LTV1 ribosome biogenesis factor	295.093	248.422	1.18712	0.24746	0.333991	1
ENSMUSG00000019809	Pex3	peroxisomal biogenesis factor 3	177.286	125.082	1.41404	0.499825	0.123347	1
ENSMUSG00000019808	Adat2	adenosine deaminase, tRNA-specific 2	34.8722	28.7897	1.20418	0.268053	0.644295	1
ENSMUSG00000019806	Aig1	androgen-induced 1	342.152	320.627	1.06693	0.0934588	0.702359	1
ENSMUSG00000071532	Gm10335	predicted gene 10335	10.0728	6.6472	1.44795	0.534016	0.644494	1
ENSMUSG00000019868	Vta1	vesicle (multivesicular body) trafficking 1	163.06	129.099	1.26103	0.334606	0.2827	1
ENSMUSG00000039910	Cited2	Cbp/p300-interacting transactivator, with Glu/Asp-rich carboxy-terminal domain, 2	1591.3	1484.75	1.07172	0.0999216	0.560658	1
ENSMUSG00000093537	Gm7584	predicted gene 7584	15.9807	13.4047	1.17883	0.237357	0.812144	1
ENSMUSG00000071392	Ect2l	epithelial cell transforming sequence 2 oncogene-like	2.70947	2.35585	1.10537	0.144535	0.975456	1
ENSMUSG00000019853	Hebp2	heme binding protein 2	29.1138	23.5526	1.2265	0.294549	0.693356	1
ENSMUSG00000019852	Arfgef3	ARFGEF family member 3	224.549	209.734	1.0703	0.0980145	0.662336	1
ENSMUSG00000019851	Perp	PERP, TP53 apoptosis effector	340.769	336.13	1.01376	0.0197124	0.932344	1
ENSMUSG00000020003	Pex7	peroxisomal biogenesis factor 7	285.581	269.98	1.05757	0.080754	0.721917	1
ENSMUSG00000019996	Map7	microtubule-associated protein 7	1880.48	1654.17	1.13673	0.184889	0.60211	1
ENSMUSG00000019990	Pde7b	phosphodiesterase 7B	248.189	242.1	1.02505	0.0356938	0.951469	1
ENSMUSG00000019986	Ahi1	Abelson helper integration site 1	339.238	284.937	1.18991	0.250848	0.39126	1
ENSMUSG00000037542	Aldh8a1	aldehyde dehydrogenase 8 family, member A1	2275.5	2014.18	1.12968	0.175912	0.599387	1
ENSMUSG00000053219	Raet1e	retinoic acid early transcript 1E	4.16491	0.638132	3.15293	1.65669	0.401721	1
ENSMUSG00000037490	Slc2a12	solute carrier family 2 (facilitated glucose transporter), member 12	126.813	123.131	1.02966	0.0421701	0.942152	1
ENSMUSG00000071359	Tbpl1	TATA box binding protein-like 1	189.375	161.164	1.17397	0.231393	0.72191	1
ENSMUSG00000061983	Rps12	ribosomal protein S12	30.5059	28.8168	1.05665	0.079496	0.899884	1
ENSMUSG00000070063	Snora33	small nucleolar RNA, H/ACA box 33	38.1137	28.4796	1.3268	0.407955	0.409677	1
ENSMUSG00000077440	Gm23130	predicted gene, 23130	12.857	11.6213	1.0979	0.134751	0.96084	1
ENSMUSG00000085451	Gm15137	predicted gene 15137	7.22525	3.24464	1.9378	0.954418	0.509883	1
ENSMUSG00000020000	Moxd1	monooxygenase, DBH-like 1	5.97123	0	6.97123	2.80141	0.0643082	1
ENSMUSG00000019989	Enpp3	ectonucleotide pyrophosphatase/phosphodiesterase 3	216.826	210.856	1.02818	0.0400903	0.805184	1
ENSMUSG00000019987	Arg1	arginase, liver	10.5617	6.84388	1.47398	0.559719	0.607356	1
ENSMUSG00000039166	Akap7	A kinase (PRKA) anchor protein 7	378.972	257.832	1.46803	0.55388	0.166745	1
ENSMUSG00000039089	L3mbtl3	l(3)mbt-like 3 (Drosophila)	210.895	191.732	1.09943	0.136754	0.621454	1
ENSMUSG00000039031	Arhgap18	Rho GTPase activating protein 18	1074.71	1050.19	1.02333	0.033266	0.91915	1
ENSMUSG00000064208	Gm10145	predicted gene 10145	20.7206	12.1073	1.65714	0.728695	0.444436	1
ENSMUSG00000019889	Ptprk	protein tyrosine phosphatase, receptor type, K	1987.37	1613.79	1.23135	0.300239	0.199192	1
ENSMUSG00000090126	4930519F09Rik	RIKEN cDNA 4930519F09 gene	11.8791	5.55273	1.96546	0.974864	0.330511	1
ENSMUSG00000019883	Echdc1	enoyl Coenzyme A hydratase domain containing 1	169.497	115.385	1.46494	0.550842	0.0962584	1
ENSMUSG00000019880	Rspo3	R-spondin 3	3.19841	2.77931	1.11089	0.151721	0.881148	1
ENSMUSG00000069682	Gm10275	predicted pseudogene 10275	1011.45	900.142	1.12352	0.168028	0.415599	1
ENSMUSG00000019792	Trmt11	tRNA methyltransferase 11	55.912	42.6832	1.30283	0.381654	0.42249	1
ENSMUSG00000000295	Hddc2	HD domain containing 2	82.0289	77.5361	1.05721	0.0802569	0.756137	1
ENSMUSG00000019787	Trdn	triadin	16.3315	15.5282	1.0486	0.0684711	0.825664	1
ENSMUSG00000019782	Rwdd1	RWD domain containing 1	132.361	114.767	1.15198	0.204114	0.495858	1
ENSMUSG00000046031	Fam26f	family with sequence similarity 26, member F	4.72858	4.48492	1.04442	0.0627072	0.952634	1
ENSMUSG00000039462	Col10a1	collagen, type X, alpha 1	32.2058	22.572	1.4087	0.494363	0.468184	1
ENSMUSG00000063953	Amd2	S-adenosylmethionine decarboxylase 2	38.6774	34.0618	1.13164	0.178416	0.703743	1
ENSMUSG00000019777	Hdac2	histone deacetylase 2	522.104	513.84	1.01605	0.0229732	0.879838	1
ENSMUSG00000069662	Marcks	myristoylated alanine rich protein kinase C substrate	791.105	639.357	1.23697	0.306816	0.476381	1
ENSMUSG00000019846	Lama4	laminin, alpha 4	267.753	184.836	1.44618	0.532252	0.122402	1
ENSMUSG00000051736	Fam229b	family with sequence similarity 229, member B	16.7774	15.054	1.10735	0.147116	0.931319	1
ENSMUSG00000019845	Tube1	epsilon-tubulin 1	16.0123	10.858	1.43467	0.520718	0.618558	1
ENSMUSG00000081608	Gm16210	predicted gene 16210	14.6202	11.8481	1.21576	0.281862	0.909588	1
ENSMUSG00000038528	Mfsd4b5	major facilitator superfamily domain containing 4B5	1917.06	1624.24	1.18017	0.238996	0.458808	1
ENSMUSG00000038522	Mfsd4b1	major facilitator superfamily domain containing 4B1	800.348	750.104	1.06689	0.0934162	0.677684	1
ENSMUSG00000019838	Slc16a10	solute carrier family 16 (monocarboxylic acid transporters), member 10	508.251	400.926	1.26703	0.341446	0.161703	1
ENSMUSG00000019837	Gtf3c6	general transcription factor IIIC, polypeptide 6, alpha	385.915	293.502	1.3138	0.39374	0.152932	1
ENSMUSG00000065870	Rnu3a	U3A small nuclear RNA	604.255	568.444	1.06289	0.0879893	0.754752	1
ENSMUSG00000075232	Amd1	S-adenosylmethionine decarboxylase 1	169.445	136.208	1.24224	0.312944	0.386289	1
ENSMUSG00000045555	Mettl24	methyltransferase like 24	12.857	9.73657	1.29063	0.36808	0.671132	1
ENSMUSG00000038446	Cdc40	cell division cycle 40	313.407	258.904	1.2097	0.274653	0.367142	1
ENSMUSG00000019831	Wasf1	WAS protein family, member 1	14.8014	11.2188	1.2932	0.370941	0.580095	1
ENSMUSG00000038417	Fig4	FIG4 phosphoinositide 5-phosphatase	259.688	255.911	1.0147	0.021058	0.788419	1
ENSMUSG00000091415	Ak9	adenylate kinase 9	3.61263	2.28744	1.40311	0.488624	0.808489	1
ENSMUSG00000019826	Zbtb24	zinc finger and BTB domain containing 24	254.48	222.936	1.14086	0.190125	0.551759	1
ENSMUSG00000019822	Smpd2	sphingomyelin phosphodiesterase 2, neutral	306.224	289.401	1.05793	0.0812479	0.845021	1
ENSMUSG00000019818	Cd164	CD164 antigen	1828.7	1469.35	1.2444	0.315448	0.162395	1
ENSMUSG00000090708	Gm17196	predicted gene 17196	4.65385	2.34685	1.6893	0.75643	0.660217	1
ENSMUSG00000019813	Cep57l1	centrosomal protein 57-like 1	48.4423	40.6046	1.18839	0.249004	0.583942	1
ENSMUSG00000085666	Gm9855	predicted pseudogene 9855	7.91561	6.95416	1.12087	0.164625	1	1
ENSMUSG00000038302	Afg1l	AFG1 like ATPase	290.405	261.21	1.11134	0.152302	0.611106	1
ENSMUSG00000081873	Gm15197	predicted gene 15197	11.7727	9.60875	1.20398	0.267809	0.876081	1
ENSMUSG00000019804	Snx3	sorting nexin 3	1016.55	1012.66	1.00383	0.00552165	0.967627	1
ENSMUSG00000038280	Ostm1	osteopetrosis associated transmembrane protein 1	286.271	256.441	1.11587	0.158172	0.559189	1
ENSMUSG00000038240	Pdss2	prenyl (solanesyl) diphosphate synthase, subunit 2	225.458	179.54	1.25434	0.326924	0.381693	1
ENSMUSG00000089673	Gm16546	predicted gene 16546	25.1073	4.31834	4.90891	2.2954	0.0231154	1
ENSMUSG00000038214	Bend3	BEN domain containing 3	166.842	159.66	1.0447	0.0630923	0.849679	1
ENSMUSG00000045886	Gm9803	predicted gene 9803	107.222	84.7938	1.26142	0.335052	0.3173	1
ENSMUSG00000019864	Rtn4ip1	reticulon 4 interacting protein 1	296.77	286.526	1.03563	0.0505037	0.840077	1
ENSMUSG00000038160	Atg5	autophagy related 5	297.834	292.615	1.01777	0.0254185	0.865764	1
ENSMUSG00000038151	Prdm1	PR domain containing 1, with ZNF domain	217.654	182.376	1.19238	0.253843	0.69916	1
ENSMUSG00000038822	Hace1	HECT domain and ankyrin repeat containing, E3 ubiquitin protein ligase 1	139.609	139.178	1.00307	0.00442857	0.976484	1
ENSMUSG00000019913	Sim1	single-minded homolog 1 (Drosophila)	816.832	773.069	1.05654	0.0793419	0.742096	1
ENSMUSG00000019891	Dcbld1	discoidin, CUB and LCCL domain containing 1	183.787	160.124	1.14686	0.19769	0.606616	1
ENSMUSG00000019861	Gopc	golgi associated PDZ and coiled-coil motif containing	605.994	560.612	1.08081	0.112107	0.645352	1
ENSMUSG00000038624	Nepn	nephrocan	111.344	78.8821	1.40637	0.491979	0.277455	1
ENSMUSG00000023068	Nus1	NUS1 dehydrodolichyl diphosphate synthase subunit	1846.49	1608.23	1.14806	0.199197	0.412856	1
ENSMUSG00000049576	Zfa-ps	zinc finger protein, autosomal, pseudogene	33.3104	21.6057	1.51778	0.601961	0.323266	1
ENSMUSG00000019857	Asf1a	anti-silencing function 1A histone chaperone	131.49	123.421	1.06485	0.0906523	0.85117	1
ENSMUSG00000019856	Fam184a	family with sequence similarity 184, member A	462.197	403.262	1.14578	0.196334	0.633352	1
ENSMUSG00000003746	Man1a	mannosidase 1, alpha	1361.05	1353.37	1.00567	0.0081526	0.990142	1
ENSMUSG00000038122	Tbc1d32	TBC1 domain family, member 32	366.362	338.698	1.08144	0.112952	0.719651	1
ENSMUSG00000050953	Gja1	gap junction protein, alpha 1	170.552	149.214	1.14205	0.191627	0.508895	1
ENSMUSG00000019876	Pkib	protein kinase inhibitor beta, cAMP dependent, testis specific	81.9858	64.7738	1.26169	0.335352	0.491254	1
ENSMUSG00000019874	Fabp7	fatty acid binding protein 7, brain	57.3334	33.8893	1.67195	0.741535	0.308564	1
ENSMUSG00000038010	Ccdc138	coiled-coil domain containing 138	51.618	27.848	1.82398	0.867087	0.148049	1
ENSMUSG00000009647	Mcu	mitochondrial calcium uniporter	302.272	246.553	1.22508	0.292874	0.342214	1
ENSMUSG00000071280	Gm10322	predicted gene 10322	5.69508	3.85889	1.3779	0.462474	0.777581	1
ENSMUSG00000020111	Micu1	mitochondrial calcium uptake 1	577.38	557.011	1.0365	0.051724	0.749196	1
ENSMUSG00000091941	Gm7399	predicted gene 7399	4.62218	1.48505	2.2624	1.17785	0.402366	1
ENSMUSG00000044475	Ascc1	activating signal cointegrator 1 complex subunit 1	332.465	322.573	1.03057	0.0434459	0.981204	1
ENSMUSG00000020100	Slc29a3	solute carrier family 29 (nucleoside transporters), member 3	743.846	684.708	1.08624	0.119348	0.607998	1
ENSMUSG00000020098	Pcbd1	pterin 4 alpha carbinolamine dehydratase/dimerization cofactor of hepatocyte nuclear factor 1 alpha (TCF1) 1	743.864	536.763	1.38511	0.470005	0.0580242	1
ENSMUSG00000061488	Rpl27a-ps1	ribosomal protein L27A, pseudogene 1	4.93	2.87471	1.53044	0.613945	0.717484	1
ENSMUSG00000037171	Nodal	nodal	10.6568	1.94138	3.96302	1.9866	0.285746	1
ENSMUSG00000020091	Eif4ebp2	eukaryotic translation initiation factor 4E binding protein 2	556.499	487.475	1.14131	0.190685	0.446876	1
ENSMUSG00000037151	Lrrc20	leucine rich repeat containing 20	37.2739	31.4224	1.18048	0.239369	0.694971	1
ENSMUSG00000020087	Tysnd1	trypsin domain containing 1	271.18	240.932	1.12503	0.169958	0.633068	1
ENSMUSG00000046687	Gm5424	predicted gene 5424	13678.2	12704.8	1.07661	0.106499	0.717695	1
ENSMUSG00000020083	2010107G23Rik	RIKEN cDNA 2010107G23 gene	20.157	10.4313	1.85079	0.888137	0.200908	1
ENSMUSG00000085347	Hk1os	hexokinase 1, opposite strand	6.73631	2.56152	2.17219	1.11915	0.489581	1
ENSMUSG00000020079	Supv3l1	suppressor of var1, 3-like 1 (S. cerevisiae)	280.744	270.882	1.03627	0.0513993	0.936845	1
ENSMUSG00000020078	Vps26a	VPS26 retromer complex component A	646.316	585.721	1.10328	0.141795	0.528506	1
ENSMUSG00000036955	Kif1bp	KIF1 binding protein	576.472	498.963	1.15503	0.207931	0.425405	1
ENSMUSG00000047146	Tet1	tet methylcytosine dioxygenase 1	203.233	160.786	1.26237	0.336131	0.281416	1
ENSMUSG00000071253	Slc25a16	solute carrier family 25 (mitochondrial carrier, Graves disease autoantigen), member 16	752.239	564.116	1.33289	0.414562	0.0871742	1
ENSMUSG00000088875	Gm25862	predicted gene, 25862	5.90788	4.77422	1.19633	0.258617	0.771905	1
ENSMUSG00000036875	Dna2	DNA replication helicase/nuclease 2	192.266	148.116	1.29607	0.374148	0.324207	1
ENSMUSG00000087030	Gm16143	predicted gene 16143	15.5031	1.95938	5.57655	2.47937	0.0324431	1
ENSMUSG00000020072	Pbld2	phenazine biosynthesis-like protein domain containing 2	1008.42	917.881	1.09853	0.135571	0.7275	1
ENSMUSG00000057134	Ado	2-aminoethanethiol (cysteamine) dioxygenase	319.435	252.891	1.26209	0.335818	0.209871	1
ENSMUSG00000019945	1700040L02Rik	RIKEN cDNA 1700040L02 gene	224.132	211.346	1.06021	0.084354	0.737772	1
ENSMUSG00000019944	Rhobtb1	Rho-related BTB domain containing 1	546.783	443.907	1.23123	0.300101	0.374589	1
ENSMUSG00000069601	Ank3	ankyrin 3, epithelial	4801.33	4637.75	1.03526	0.0499994	0.834239	1
ENSMUSG00000037762	Slc16a9	solute carrier family 16 (monocarboxylic acid transporters), member 9	316.628	300.747	1.05263	0.0739953	0.82753	1
ENSMUSG00000037747	Phyhipl	phytanoyl-CoA hydroxylase interacting protein-like	500.989	383.478	1.30564	0.384754	0.149254	1
ENSMUSG00000047692	4930533K18Rik	RIKEN cDNA 4930533K18 gene	11.9855	11.9645	1.00162	0.00233693	0.89384	1
ENSMUSG00000014329	Bicc1	BicC family RNA binding protein 1	3501.87	3119.66	1.12248	0.166688	0.429938	1
ENSMUSG00000090212	Gm15647	predicted gene 15647	22.5789	12.6711	1.72472	0.786363	0.342991	1
ENSMUSG00000037710	Cisd1	CDGSH iron sulfur domain 1	1019.21	863.461	1.18017	0.238993	0.259658	1
ENSMUSG00000060733	Ipmk	inositol polyphosphate multikinase	1144.48	1120.37	1.0215	0.0306949	0.80879	1
ENSMUSG00000091825	Gm5778	predicted gene 5778	26.6057	25.8013	1.03002	0.042667	1	1
ENSMUSG00000072407	Gm6419	predicted gene 6419	232.643	182.248	1.27501	0.350511	0.393416	1
ENSMUSG00000020175	Rab36	RAB36, member RAS oncogene family	53.9449	51.5346	1.04588	0.0647181	0.992763	1
ENSMUSG00000009681	Bcr	breakpoint cluster region	1349.41	1280.43	1.05383	0.075643	0.752622	1
ENSMUSG00000033416	Gucd1	guanylyl cyclase domain containing 1	1078.26	967.477	1.11439	0.156254	0.596579	1
ENSMUSG00000033427	Upb1	ureidopropionase, beta	706.558	482.616	1.46306	0.548986	0.0502299	1
ENSMUSG00000020180	Snrpd3	small nuclear ribonucleoprotein D3	293.655	277.932	1.05637	0.0791152	0.734675	1
ENSMUSG00000006342	Susd2	sushi domain containing 2	1377.63	1284.72	1.07226	0.100659	0.660614	1
ENSMUSG00000001666	Ddt	D-dopachrome tautomerase	307.438	256.591	1.1974	0.2599	0.309067	1
ENSMUSG00000001665	Gstt3	glutathione S-transferase, theta 3	216.832	186.579	1.16128	0.215717	0.485266	1
ENSMUSG00000001663	Gstt1	glutathione S-transferase, theta 1	370.69	325.5	1.13841	0.18702	0.447907	1
ENSMUSG00000009093	Gstt4	glutathione S-transferase, theta 4	6.76798	6.5518	1.02863	0.0407199	0.972251	1
ENSMUSG00000033318	Gstt2	glutathione S-transferase, theta 2	795.484	557.508	1.42609	0.512067	0.0962912	1
ENSMUSG00000033307	Mif	macrophage migration inhibitory factor (glycosylation-inhibiting factor)	324.353	188.689	1.7152	0.778375	0.0204258	1
ENSMUSG00000009092	Derl3	Der1-like domain family, member 3	19.9758	16.2617	1.21517	0.281152	0.64242	1
ENSMUSG00000000902	Smarcb1	SWI/SNF related, matrix associated, actin dependent regulator of chromatin, subfamily b, member 1	450.657	398.644	1.13015	0.176514	0.551202	1
ENSMUSG00000000901	Mmp11	matrix metallopeptidase 11	33.9057	24.3549	1.37669	0.461201	0.43582	1
ENSMUSG00000049422	Chchd10	coiled-coil-helix-coiled-coil-helix domain containing 10	2622.46	1964.47	1.33478	0.4166	0.168973	1
ENSMUSG00000020229	Slc5a4a	solute carrier family 5, member 4a	9.03156	6.85332	1.27737	0.353172	0.844859	1
ENSMUSG00000020230	Prmt2	protein arginine N-methyltransferase 2	125.815	114.301	1.09986	0.13732	0.729555	1
ENSMUSG00000020231	Dip2a	disco interacting protein 2 homolog A	435.804	415.613	1.04846	0.0682778	0.747949	1
ENSMUSG00000089711	Gm16240	predicted gene 16240	5.0364	3.77249	1.26483	0.338945	0.849028	1
ENSMUSG00000033126	Ybey	ybeY metallopeptidase	52.6592	35.1031	1.48628	0.571704	0.302455	1
ENSMUSG00000033105	Lss	lanosterol synthase	218.089	166.544	1.30765	0.386978	0.183766	1
ENSMUSG00000086241	4930483K19Rik	RIKEN cDNA 4930483K19 gene	3.23008	1.83111	1.49415	0.57932	0.726601	1
ENSMUSG00000009115	Spatc1l	spermatogenesis and centriole associated 1 like	8.68069	5.91367	1.40023	0.48566	0.744718	1
ENSMUSG00000001436	Slc19a1	solute carrier family 19 (folate transporter), member 1	361.915	306.86	1.17883	0.237354	0.367867	1
ENSMUSG00000001435	Col18a1	collagen, type XVIII, alpha 1	3979.81	3898.82	1.02077	0.0296536	0.925811	1
ENSMUSG00000020262	Adarb1	adenosine deaminase, RNA-specific, B1	281.574	262.605	1.07196	0.100253	0.857527	1
ENSMUSG00000032977	Fam207a	family with sequence similarity 207, member A	169.189	164.555	1.02799	0.0398252	0.949095	1
ENSMUSG00000000290	Itgb2	integrin beta 2	801.146	797.133	1.00503	0.00723654	0.925952	1
ENSMUSG00000009291	Pttg1ip	pituitary tumor-transforming 1 interacting protein	1766.95	1715.24	1.03013	0.0428303	0.81259	1
ENSMUSG00000009293	Ube2g2	ubiquitin-conjugating enzyme E2G 2	163.632	157.131	1.04111	0.0581236	0.870728	1
ENSMUSG00000020284	1810043G02Rik	RIKEN cDNA 1810043G02 gene	191.492	155.53	1.22974	0.298358	0.339856	1
ENSMUSG00000020277	Pfkl	phosphofructokinase, liver, B-type	757.914	710.138	1.06718	0.0938057	0.679204	1
ENSMUSG00000000731	Aire	autoimmune regulator (autoimmune polyendocrinopathy candidiasis ectodermal dystrophy)	4.13324	0.846919	2.77935	1.47475	0.333513	1
ENSMUSG00000053329	D10Jhu81e	DNA segment, Chr 10, Johns Hopkins University 81 expressed	1155.7	833.234	1.38655	0.471495	0.0585916	1
ENSMUSG00000000374	Trappc10	trafficking protein particle complex 10	674.457	657.571	1.02564	0.0365259	0.802152	1
ENSMUSG00000001211	Agpat3	1-acylglycerol-3-phosphate O-acyltransferase 3	3120.82	2971.74	1.05015	0.0705925	0.706697	1
ENSMUSG00000064317	Gm10146	predicted gene 10146	65.5706	45.9605	1.41759	0.503437	0.211416	1
ENSMUSG00000061032	Rrp1	ribosomal RNA processing 1 homolog (S. cerevisiae)	1397.11	1344.46	1.03913	0.0553754	0.790946	1
ENSMUSG00000005054	Cstb	cystatin B	192.766	175.799	1.09597	0.132208	0.671151	1
ENSMUSG00000032763	Ilvbl	ilvB (bacterial acetolactate synthase)-like	217.099	196.893	1.10211	0.140267	0.60036	1
ENSMUSG00000032714	Syde1	synapse defective 1, Rho GTPase, homolog 1 (C. elegans)	315.405	277.852	1.13467	0.182277	0.576189	1
ENSMUSG00000060301	2610008E11Rik	RIKEN cDNA 2610008E11 gene	209.1	201.372	1.03819	0.0540702	0.820562	1
ENSMUSG00000042570	Mier2	MIER family member 2	94.141	66.6901	1.40554	0.491124	0.230432	1
ENSMUSG00000020312	Shc2	SHC (Src homology 2 domain containing) transforming protein 2	7.88394	3.88588	1.81829	0.862581	0.501219	1
ENSMUSG00000020308	Tpgs1	tubulin polyglutamylase complex subunit 1	165.364	138.042	1.1965	0.258818	0.525262	1
ENSMUSG00000023175	Bsg	basigin	4195.01	3559.57	1.17847	0.236911	0.271892	1
ENSMUSG00000020331	Hcn2	hyperpolarization-activated, cyclic nucleotide-gated K+ 2	32.5453	17.2518	1.83792	0.878073	0.189707	1
ENSMUSG00000035863	Palm	paralemmin	1339.79	994.497	1.34685	0.429593	0.210491	1
ENSMUSG00000035852	Misp	mitotic spindle positioning	426.797	310.728	1.37234	0.456638	0.0642417	1
ENSMUSG00000035781	R3hdm4	R3H domain containing 4	459.426	441.75	1.03992	0.0564767	0.696364	1
ENSMUSG00000035773	Kiss1r	KISS1 receptor	24.2471	13.4761	1.74406	0.80245	0.311741	1
ENSMUSG00000019564	Arid3a	AT rich interactive domain 3A (BRIGHT-like)	329.43	309.973	1.06257	0.0875576	0.822194	1
ENSMUSG00000035754	Wdr18	WD repeat domain 18	341.24	284.809	1.19744	0.259954	0.318432	1
ENSMUSG00000035745	Grin3b	glutamate receptor, ionotropic, NMDA3B	33.8424	24.7668	1.35222	0.43533	0.549469	1
ENSMUSG00000004667	Polr2e	polymerase (RNA) II (DNA directed) polypeptide E	406.627	327	1.24277	0.313554	0.232942	1
ENSMUSG00000003072	Atp5d	ATP synthase, H+ transporting, mitochondrial F1 complex, delta subunit	2291.51	2002.61	1.14419	0.194324	0.358488	1
ENSMUSG00000035595	1600002K03Rik	RIKEN cDNA 1600002K03 gene	45.8279	33.7162	1.34888	0.431759	0.439616	1
ENSMUSG00000020156	Mum1	melanoma associated antigen (mutated) 1	284.537	278.121	1.02299	0.032791	0.960621	1
ENSMUSG00000020153	Ndufs7	NADH dehydrogenase (ubiquinone) Fe-S protein 7	972.564	815.235	1.19275	0.254292	0.331837	1
ENSMUSG00000020150	Gamt	guanidinoacetate methyltransferase	69.3416	41.2101	1.66647	0.736791	0.087397	1
ENSMUSG00000087672	Gm15122	predicted gene 15122	12.2933	11.2905	1.08159	0.11316	1	1
ENSMUSG00000063457	Rps15	ribosomal protein S15	1347.32	1265.87	1.0643	0.089901	0.627064	1
ENSMUSG00000020133	2310011J03Rik	RIKEN cDNA 2310011J03 gene	137.803	101.617	1.35263	0.43577	0.190496	1
ENSMUSG00000020131	Pcsk4	proprotein convertase subtilisin/kexin type 4	36.6899	33.1356	1.10412	0.142902	0.83815	1
ENSMUSG00000035504	Reep6	receptor accessory protein 6	226.772	200.846	1.12844	0.174331	0.463005	1
ENSMUSG00000035486	Plk5	polo-like kinase 5	5.41894	3.67709	1.37242	0.456722	0.785431	1
ENSMUSG00000020163	Uqcr11	ubiquinol-cytochrome c reductase, complex III subunit XI	778.743	705.327	1.10394	0.142663	0.483875	1
ENSMUSG00000020167	Tcf3	transcription factor 3	412.822	399.245	1.03392	0.0481277	0.746632	1
ENSMUSG00000047417	Rexo1	REX1, RNA exonuclease 1	577.993	538.655	1.07289	0.101508	0.785082	1
ENSMUSG00000035397	Klf16	Kruppel-like factor 16	93.5254	92.1395	1.01488	0.0213088	0.9631	1
ENSMUSG00000003346	Abhd17a	abhydrolase domain containing 17A	263.724	249.743	1.05576	0.0782793	0.699872	1
ENSMUSG00000003345	Csnk1g2	casein kinase 1, gamma 2	1142.17	1063.83	1.07358	0.102429	0.659104	1
ENSMUSG00000003344	Btbd2	BTB (POZ) domain containing 2	353.755	341.82	1.03481	0.0493693	0.834559	1
ENSMUSG00000003348	Mob3a	MOB kinase activator 3A	88.4054	87.7596	1.00728	0.0104578	0.897211	1
ENSMUSG00000055862	Izumo4	IZUMO family member 4	35.3295	33.9876	1.03835	0.054297	1	1
ENSMUSG00000035278	Plekhj1	pleckstrin homology domain containing, family J member 1	120.407	98.7656	1.21693	0.283241	0.483774	1
ENSMUSG00000020211	Sf3a2	splicing factor 3a, subunit 2	242.77	206.822	1.17297	0.230171	0.497675	1
ENSMUSG00000035242	Oaz1	ornithine decarboxylase antizyme 1	135.039	132.017	1.02272	0.0324135	0.858956	1
ENSMUSG00000020219	Timm13	translocase of inner mitochondrial membrane 13	279.915	279.076	1.00299	0.00431334	0.943946	1
ENSMUSG00000062075	Lmnb2	lamin B2	143.21	134.841	1.06161	0.0862563	0.751732	1
ENSMUSG00000048240	Gng7	guanine nucleotide binding protein (G protein), gamma 7	25.5328	14.2484	1.74005	0.799125	0.226175	1
ENSMUSG00000004937	Sgta	small glutamine-rich tetratricopeptide repeat (TPR)-containing, alpha	701.504	649.605	1.07977	0.110725	0.582797	1
ENSMUSG00000004929	Thop1	thimet oligopeptidase 1	199.174	135.602	1.46538	0.551276	0.0799662	1
ENSMUSG00000035027	Map2k2	mitogen-activated protein kinase kinase 2	1283.5	1148.01	1.11792	0.160819	0.46208	1
ENSMUSG00000034994	Eef2	eukaryotic translation elongation factor 2	13996.7	13903.2	1.00673	0.00967516	0.915212	1
ENSMUSG00000053603	4930442H23Rik	RIKEN cDNA 4930442H23 gene	16.2999	13.7355	1.17403	0.231464	0.824036	1
ENSMUSG00000034974	Dapk3	death-associated protein kinase 3	276.613	253.232	1.09197	0.126931	0.684261	1
ENSMUSG00000090230	Gm16315	predicted gene 16315	14.2377	9.28069	1.48217	0.567709	0.623195	1
ENSMUSG00000034872	Gipc3	GIPC PDZ domain containing family, member 3	20.5078	10.1844	1.92303	0.943379	0.348651	1
ENSMUSG00000034854	Mfsd12	major facilitator superfamily domain containing 12	178.135	123.555	1.43819	0.524259	0.130216	1
ENSMUSG00000020238	Ncln	nicalin	731.969	573.411	1.27604	0.351669	0.149781	1
ENSMUSG00000034792	Gna15	guanine nucleotide binding protein, alpha 15	66.8133	46.8702	1.41661	0.50244	0.296626	1
ENSMUSG00000034781	Gna11	guanine nucleotide binding protein, alpha 11	686.929	662.176	1.03732	0.0528676	0.836058	1
ENSMUSG00000054452	Aes	amino-terminal enhancer of split	3073.49	2686.78	1.14388	0.193935	0.390207	1
ENSMUSG00000034748	Sirt6	sirtuin 6	55.8056	50.8396	1.0958	0.13198	0.661437	1
ENSMUSG00000054708	Ankrd24	ankyrin repeat domain 24	505.512	414.255	1.21976	0.286598	0.464723	1
ENSMUSG00000073427	Gm4924	predicted gene 4924	7.08718	6.79923	1.03692	0.0523047	0.855382	1
ENSMUSG00000063320	1190007I07Rik	RIKEN cDNA 1190007I07 gene	49.8117	26.4754	1.84935	0.88702	0.126656	1
ENSMUSG00000020250	Txnrd1	thioredoxin reductase 1	1480.29	1463.97	1.01114	0.015982	0.941239	1
ENSMUSG00000071151	Gm4799	predicted gene 4799	142.563	117.726	1.20919	0.274043	0.379685	1
ENSMUSG00000020263	Appl2	adaptor protein, phosphotyrosine interaction, PH domain and leucine zipper containing 2	946.375	768.706	1.23083	0.299627	0.226445	1
ENSMUSG00000087651	1500009L16Rik	RIKEN cDNA 1500009L16 gene	4.59051	3.45342	1.25533	0.328064	0.737748	1
ENSMUSG00000089096	Gm25657	predicted gene, 25657	3.71902	3.40256	1.07188	0.100146	0.865729	1
ENSMUSG00000035620	Ric8b	RIC8 guanine nucleotide exchange factor B	369.545	321.679	1.14834	0.199548	0.426656	1
ENSMUSG00000060935	Tmem263	transmembrane protein 263	96.5541	94.1799	1.02494	0.0355458	0.908983	1
ENSMUSG00000050490	Gm8394	predicted gene 8394	185.573	155.038	1.19569	0.257842	0.431252	1
ENSMUSG00000001785	Pwp1	PWP1 homolog, endonuclein	195.827	149.605	1.30691	0.386156	0.257575	1
ENSMUSG00000001783	Rtcb	RNA 2',3'-cyclic phosphate and 5'-OH ligase	760.279	710.657	1.06973	0.0972423	0.677165	1
ENSMUSG00000087256	Gm15990	predicted gene 15990	19.3805	15.7785	1.21468	0.280575	0.807233	1
ENSMUSG00000020044	Timp3	tissue inhibitor of metalloproteinase 3	15753.5	14358.9	1.09711	0.133714	0.70808	1
ENSMUSG00000084899	Gm15344	predicted gene 15344	45.9457	23.0099	1.95527	0.967365	0.0999304	1
ENSMUSG00000020053	Igf1	insulin-like growth factor 1	251.799	176.928	1.42079	0.506698	0.184824	1
ENSMUSG00000035365	Parpbp	PARP1 binding protein	4.62218	2.26945	1.71961	0.782083	0.611566	1
ENSMUSG00000035351	Nup37	nucleoporin 37	34.4897	26.2666	1.30158	0.380265	0.615853	1
ENSMUSG00000020056	Washc3	WASH complex subunit 3	142.137	126.937	1.11881	0.16197	0.53539	1
ENSMUSG00000020057	Dram1	DNA-damage regulated autophagy modulator 1	188.592	141.335	1.33202	0.413612	0.239032	1
ENSMUSG00000035311	Gnptab	N-acetylglucosamine-1-phosphate transferase, alpha and beta subunits	649.75	649.188	1.00086	0.00124733	0.975391	1
ENSMUSG00000020061	Mybpc1	myosin binding protein C, slow-type	4.37771	3.31616	1.24595	0.317245	0.791227	1
ENSMUSG00000004359	Spic	Spi-C transcription factor (Spi-1/PU.1 related)	28.8377	17.2159	1.638	0.711934	0.345462	1
ENSMUSG00000004356	Utp20	UTP20 small subunit processome component	740.691	681.664	1.08647	0.119643	0.647694	1
ENSMUSG00000035189	Ano4	anoctamin 4	20.5078	14.8326	1.35845	0.441961	0.612365	1
ENSMUSG00000069539	Scyl2	SCY1-like 2 (S. cerevisiae)	676.236	658.916	1.02625	0.0373754	0.924304	1
ENSMUSG00000019948	Actr6	ARP6 actin-related protein 6	84.9714	68.5947	1.23532	0.30488	0.488031	1
ENSMUSG00000061904	Slc25a3	solute carrier family 25 (mitochondrial carrier, phosphate carrier), member 3	4622.1	3902.43	1.18437	0.244119	0.22253	1
ENSMUSG00000077167	Gm24119	predicted gene, 24119	943.401	891.669	1.05795	0.0812742	0.616578	1
ENSMUSG00000019961	Tmpo	thymopoietin	870.06	854.031	1.01875	0.0267952	0.870294	1
ENSMUSG00000019988	Nedd1	neural precursor cell expressed, developmentally down-regulated gene 1	139.089	133.412	1.04223	0.0596731	0.817471	1
ENSMUSG00000020014	Cfap54	cilia and flagella associated protein 54	72.7553	70.361	1.03355	0.0476098	0.912029	1
ENSMUSG00000008398	Elk3	ELK3, member of ETS oncogene family	456.821	424.184	1.07676	0.106697	0.729366	1
ENSMUSG00000015889	Lta4h	leukotriene A4 hydrolase	552.927	510.923	1.08205	0.113767	0.657422	1
ENSMUSG00000020017	Hal	histidine ammonia lyase	7.60779	6.48927	1.14935	0.200817	0.95416	1
ENSMUSG00000015890	Amdhd1	amidohydrolase domain containing 1	22.2711	11.7197	1.82953	0.871473	0.200801	1
ENSMUSG00000036168	Ccdc38	coiled-coil domain containing 38	4.37771	3.19066	1.28326	0.359814	0.864526	1
ENSMUSG00000020018	Snrpf	small nuclear ribonucleoprotein polypeptide F	61.0638	50.5526	1.20389	0.267705	0.617049	1
ENSMUSG00000020021	Fgd6	FYVE, RhoGEF and PH domain containing 6	319.593	294.057	1.08655	0.11975	0.843597	1
ENSMUSG00000005897	Nr2c1	nuclear receptor subfamily 2, group C, member 1	151.434	124.554	1.21409	0.279875	0.472633	1
ENSMUSG00000020022	Ndufa12	NADH dehydrogenase (ubiquinone) 1 alpha subcomplex, 12	566.086	501.635	1.12823	0.174058	0.635769	1
ENSMUSG00000086269	Tmcc3os	transmembrane and coiled coil domains 3, opposite strand	17.7756	14.252	1.23102	0.299857	0.906102	1
ENSMUSG00000045867	Cradd	CASP2 and RIPK1 domain containing adaptor with death domain	98.3173	97.3776	1.00955	0.0137152	1	1
ENSMUSG00000020027	Socs2	suppressor of cytokine signaling 2	223.657	134.783	1.65453	0.726423	0.0253196	1
ENSMUSG00000062981	Mrpl42	mitochondrial ribosomal protein L42	384.333	327.783	1.172	0.228969	0.348712	1
ENSMUSG00000090035	Galnt4	UDP-N-acetyl-alpha-D-galactosamine:polypeptide N-acetylgalactosaminyltransferase 4	185.374	164.011	1.12946	0.175636	0.555879	1
ENSMUSG00000089994	Gm16239	predicted gene 16239	15.365	9.5872	1.54574	0.628296	0.49219	1
ENSMUSG00000019960	Dusp6	dual specificity phosphatase 6	818.983	809.522	1.01167	0.0167426	0.948464	1
ENSMUSG00000019966	Kitl	kit ligand	664.547	661.371	1.00479	0.00690036	0.923871	1
ENSMUSG00000036676	Tmtc3	transmembrane and tetratricopeptide repeat containing 3	319.156	258.682	1.23288	0.302031	0.363531	1
ENSMUSG00000019971	Cep290	centrosomal protein 290	505.057	488.215	1.03443	0.0488301	0.971755	1
ENSMUSG00000046567	4930430F08Rik	RIKEN cDNA 4930430F08 gene	62.5939	41.2282	1.50596	0.590683	0.226957	1
ENSMUSG00000019892	Lrriq1	leucine-rich repeats and IQ motif containing 1	24.2788	21.9337	1.10226	0.140459	0.825066	1
ENSMUSG00000036019	Tmtc2	transmembrane and tetratricopeptide repeat containing 2	89.5302	66.6111	1.33899	0.42114	0.322504	1
ENSMUSG00000085282	Gm15663	predicted gene 15663	14.2808	10.8815	1.2861	0.363004	0.698127	1
ENSMUSG00000035948	Acss3	acyl-CoA synthetase short-chain family member 3	249.018	227.567	1.09385	0.129412	0.636918	1
ENSMUSG00000019906	Lin7a	lin-7 homolog A (C. elegans)	69.0541	56.6439	1.21529	0.281302	0.569045	1
ENSMUSG00000065653	Gm23105	predicted gene, 23105	9.20131	5.66889	1.52969	0.613235	0.696692	1
ENSMUSG00000020181	Nav3	neuron navigator 3	29.5711	13.6045	2.09327	1.06576	0.118654	1
ENSMUSG00000020185	E2f7	E2F transcription factor 7	25.5759	23.77	1.0729	0.101522	0.940573	1
ENSMUSG00000020186	Csrp2	cysteine and glycine-rich protein 2	831.502	813.152	1.02254	0.0321553	0.896295	1
ENSMUSG00000035798	Zdhhc17	zinc finger, DHHC domain containing 17	436.96	413.672	1.05616	0.0788285	0.798905	1
ENSMUSG00000020189	Osbpl8	oxysterol binding protein-like 8	2251.04	1920.09	1.17227	0.229305	0.305111	1
ENSMUSG00000087819	Gm25117	predicted gene, 25117	62.9448	57.2214	1.0983	0.135278	0.794404	1
ENSMUSG00000063334	Krr1	KRR1, small subunit (SSU) processome component, homolog (yeast)	355.126	354.569	1.00157	0.00226189	0.938407	1
ENSMUSG00000035681	Kcnc2	potassium voltage gated channel, Shaw-related subfamily, member 2	23.7379	18.1758	1.29006	0.367438	0.561656	1
ENSMUSG00000074748	Atxn7l3b	ataxin 7-like 3B	818.706	763.322	1.07246	0.100927	0.670548	1
ENSMUSG00000020132	Rab21	RAB21, member RAS oncogene family	585.782	561.524	1.04312	0.06091	0.817788	1
ENSMUSG00000069520	Tmem19	transmembrane protein 19	508.772	362.659	1.40179	0.487266	0.053529	1
ENSMUSG00000020140	Lgr5	leucine rich repeat containing G protein coupled receptor 5	88.1812	68.1382	1.2899	0.367256	0.565429	1
ENSMUSG00000034127	Tspan8	tetraspanin 8	513.308	479.892	1.06949	0.0969182	0.815739	1
ENSMUSG00000020151	Ptprr	protein tyrosine phosphatase, receptor type, R	34.0438	30.131	1.12569	0.170805	0.92542	1
ENSMUSG00000020154	Ptprb	protein tyrosine phosphatase, receptor type, B	6479.76	6371.53	1.01698	0.0242968	0.989062	1
ENSMUSG00000020166	Cnot2	CCR4-NOT transcription complex, subunit 2	559.663	544.704	1.02741	0.0390146	0.915599	1
ENSMUSG00000064181	Rab3ip	RAB3A interacting protein	2135.14	1993.34	1.0711	0.0990947	0.583638	1
ENSMUSG00000031294	D630029K05Rik	RIKEN cDNA D630029K05 gene	259.933	220.754	1.17668	0.234717	0.335068	1
ENSMUSG00000034024	Cct2	chaperonin containing Tcp1, subunit 2 (beta)	1303.32	1289.63	1.01061	0.0152268	0.895465	1
ENSMUSG00000020171	Yeats4	YEATS domain containing 4	219.11	205.974	1.06347	0.0887761	0.636207	1
ENSMUSG00000069515	Lyz1	lysozyme 1	18.8282	12.8798	1.42856	0.514566	0.468986	1
ENSMUSG00000060181	Slc35e3	solute carrier family 35, member E3	213.786	165.832	1.28744	0.364506	0.189315	1
ENSMUSG00000052798	Nup107	nucleoporin 107	111.482	106.969	1.0418	0.0590722	0.939206	1
ENSMUSG00000055170	Ifng	interferon gamma	19.7427	15.0711	1.29069	0.368141	0.614377	1
ENSMUSG00000020114	Cand1	cullin associated and neddylation disassociated 1	1037.61	942.104	1.10126	0.139161	0.554651	1
ENSMUSG00000034813	Grip1	glutamate receptor interacting protein 1	85.5237	71.557	1.19249	0.25398	0.560797	1
ENSMUSG00000085418	Grip1os1	glutamate receptor interacting protein 1, opposite strand 1	7.53307	3.6591	1.83148	0.873013	0.596733	1
ENSMUSG00000020225	Tmbim4	transmembrane BAX inhibitor motif containing 4	533.195	438.475	1.21553	0.281587	0.260278	1
ENSMUSG00000020224	Llph	LLP homolog, long-term synaptic facilitation (Aplysia)	81.0079	48.1347	1.66904	0.739021	0.116188	1
ENSMUSG00000034764	1700006J14Rik	RIKEN cDNA 1700006J14 gene	5.41894	3.71263	1.36207	0.445803	0.716626	1
ENSMUSG00000048661	Lemd3	LEM domain containing 3	357.673	300.265	1.19055	0.251634	0.434855	1
ENSMUSG00000052302	Tbc1d30	TBC1 domain family, member 30	73.8574	66.8594	1.10312	0.141596	0.77077	1
ENSMUSG00000034707	Gns	glucosamine (N-acetyl)-6-sulfatase	3218.41	2820.01	1.14123	0.190586	0.375094	1
ENSMUSG00000025795	Rassf3	Ras association (RalGDS/AF-6) domain family member 3	844.676	745.635	1.13265	0.179702	0.463697	1
ENSMUSG00000034613	Ppm1h	protein phosphatase 1H (PP2C domain containing)	2202.05	2006.52	1.0974	0.134094	0.539268	1
ENSMUSG00000020102	Slc16a7	solute carrier family 16 (monocarboxylic acid transporters), member 7	2199.24	2020.56	1.08839	0.12219	0.700397	1
ENSMUSG00000025436	Atp23	ATP23 metallopeptidase and ATP synthase assembly factor homolog	27.3075	15.5012	1.71548	0.778613	0.222493	1
ENSMUSG00000078429	Ctdsp2	CTD (carboxy-terminal domain, RNA polymerase II, polypeptide A) small phosphatase 2	854.353	844.154	1.01207	0.0173047	0.89956	1
ENSMUSG00000040521	Tsfm	Ts translation elongation factor, mitochondrial	186.849	151.956	1.22813	0.296461	0.303033	1
ENSMUSG00000006724	Cyp27b1	cytochrome P450, family 27, subfamily b, polypeptide 1	35.6487	28.4568	1.24415	0.315162	0.707053	1
ENSMUSG00000040502	March9	membrane-associated ring finger (C3HC4) 9	119.228	99.4704	1.19665	0.259003	0.45436	1
ENSMUSG00000006728	Cdk4	cyclin-dependent kinase 4	290.425	239.706	1.21071	0.275854	0.35894	1
ENSMUSG00000006736	Tspan31	tetraspanin 31	251.759	186.513	1.34796	0.430775	0.17883	1
ENSMUSG00000040462	Os9	amplified in osteosarcoma	3097.7	2858.96	1.08347	0.115666	0.587431	1
ENSMUSG00000006731	B4galnt1	beta-1,4-N-acetyl-galactosaminyl transferase 1	170.909	165.097	1.035	0.0496254	0.897944	1
ENSMUSG00000040441	Slc26a10	solute carrier family 26, member 10	55.5181	36.3162	1.51457	0.59891	0.199928	1
ENSMUSG00000025410	Dctn2	dynactin 2	972.807	876.32	1.10998	0.150533	0.488424	1
ENSMUSG00000092593	Gm20492	predicted gene 20492	7.60779	1.94138	2.92644	1.54915	0.271623	1
ENSMUSG00000040345	Arhgap9	Rho GTPase activating protein 9	91.8686	79.988	1.1467	0.197482	0.709914	1
ENSMUSG00000025404	R3hdm2	R3H domain containing 2	1943.18	1935.89	1.00377	0.00542493	0.968401	1
ENSMUSG00000025403	Shmt2	serine hydroxymethyltransferase 2 (mitochondrial)	1066.17	961.436	1.10882	0.149025	0.572504	1
ENSMUSG00000025402	Nab2	Ngfi-A binding protein 2	236.509	207.617	1.1385	0.187128	0.69709	1
ENSMUSG00000044617	Zbtb39	zinc finger and BTB domain containing 39	304.45	264.137	1.15205	0.204199	0.57893	1
ENSMUSG00000058396	Gpr182	G protein-coupled receptor 182	55.5612	47.3799	1.1691	0.225403	0.563757	1
ENSMUSG00000089789	Rdh1	retinol dehydrogenase 1 (all trans)	8.12841	5.76429	1.3495	0.432424	0.753975	1
ENSMUSG00000056148	Rdh9	retinol dehydrogenase 9	12.0488	4.7117	2.28458	1.19193	0.326764	1
ENSMUSG00000054031	Rdh18-ps	retinol dehydrogenase 18, pseudogene	9.93472	6.21519	1.51551	0.599807	0.688082	1
ENSMUSG00000054052	Rdh19	retinol dehydrogenase 19	5.76981	0.97519	3.42742	1.77712	0.230233	1
ENSMUSG00000025395	Prim1	DNA primase, p49 subunit	72.7959	37.3147	1.92604	0.94564	0.0960945	1
ENSMUSG00000025393	Atp5b	ATP synthase, H+ transporting mitochondrial F1 complex, beta subunit	20148.8	17263.9	1.1671	0.222927	0.268507	1
ENSMUSG00000064778	Snord59a	small nucleolar RNA, C/D box 59A	16.2568	14.2398	1.13235	0.17932	0.801489	1
ENSMUSG00000093245	Mir677	microRNA 677	22.4408	21.9396	1.02185	0.0311832	0.952763	1
ENSMUSG00000040043	Rbms2	RNA binding motif, single stranded interacting protein 2	604.826	586.28	1.03158	0.044855	0.85757	1
ENSMUSG00000044005	Gls2	glutaminase 2 (liver, mitochondrial)	8.05368	4.92093	1.5291	0.61268	0.802134	1
ENSMUSG00000051346	Spryd4	SPRY domain containing 4	59.7033	45.5551	1.3039	0.382838	0.449362	1
ENSMUSG00000040033	Stat2	signal transducer and activator of transcription 2	566.739	547.677	1.03474	0.0492691	0.994324	1
ENSMUSG00000025381	Cnpy2	canopy FGF signaling regulator 2	469.347	412.986	1.13614	0.184146	0.47281	1
ENSMUSG00000039914	Coq10a	coenzyme Q10A	145.017	130.349	1.11167	0.152725	0.575694	1
ENSMUSG00000014498	Ankrd52	ankyrin repeat domain 52	612.313	607.966	1.00714	0.0102617	0.998192	1
ENSMUSG00000039878	Slc39a5	solute carrier family 39 (metal ion transporter), member 5	355.182	152.241	2.32432	1.21681	0.0269012	1
ENSMUSG00000025374	Nabp2	nucleic acid binding protein 2	251.716	244.468	1.02953	0.0419802	0.882606	1
ENSMUSG00000025369	Smarcc2	SWI/SNF related, matrix associated, actin dependent regulator of chromatin, subfamily c, member 2	3050.13	2867.31	1.06374	0.0891439	0.702248	1
ENSMUSG00000039810	Zc3h10	zinc finger CCCH type containing 10	220.252	189.021	1.16436	0.219531	0.557467	1
ENSMUSG00000093674	Rpl41	ribosomal protein L41	1289.93	1104	1.16826	0.224361	0.320766	1
ENSMUSG00000025364	Pa2g4	proliferation-associated 2G4	672.025	649.514	1.0346	0.0490799	0.914366	1
ENSMUSG00000025362	Rps26	ribosomal protein S26	279.239	261.72	1.06668	0.0931297	0.702482	1
ENSMUSG00000049858	Suox	sulfite oxidase	341.321	288.362	1.18302	0.242472	0.347502	1
ENSMUSG00000000711	Rab5b	RAB5B, member RAS oncogene family	448.378	442.72	1.01275	0.018282	0.78181	1
ENSMUSG00000064030	Pym1	PYM homolog 1, exon junction complex associated factor	88.7018	87.282	1.01608	0.0230177	0.933243	1
ENSMUSG00000045055	Rpsa-ps2	ribosomal protein SA, pseudogene 2	12.5808	11.4512	1.09073	0.12529	0.890103	1
ENSMUSG00000047090	Tmem198b	transmembrane protein 198b	55.6245	55.4833	1.0025	0.00360193	0.945062	1
ENSMUSG00000025353	Ormdl2	ORM1-like 2 (S. cerevisiae)	51.2038	46.7603	1.09304	0.128343	0.811929	1
ENSMUSG00000025351	Cd63	CD63 antigen	665.301	549.411	1.21055	0.275663	0.267411	1
ENSMUSG00000025347	Mettl7b	methyltransferase like 7B	904.932	745.64	1.21335	0.27899	0.38902	1
ENSMUSG00000082286	Pisd-ps1	phosphatidylserine decarboxylase, pseudogene 1	205.488	193.064	1.06402	0.0895226	0.744469	1
ENSMUSG00000081208	Gm11400	predicted gene 11400	60.7559	58.9504	1.03012	0.0428085	0.97437	1
ENSMUSG00000020457	Drg1	developmentally regulated GTP binding protein 1	279.057	276.521	1.00914	0.0131245	0.948661	1
ENSMUSG00000086049	Gm12735	predicted gene 12735	4.65385	2.47823	1.6255	0.70088	0.655773	1
ENSMUSG00000020454	Eif4enif1	eukaryotic translation initiation factor 4E nuclear import factor 1	554.008	549.458	1.00827	0.0118764	0.957814	1
ENSMUSG00000020453	Patz1	POZ (BTB) and AT hook containing zinc finger 1	313.835	285.776	1.09784	0.13467	0.692904	1
ENSMUSG00000084941	Gm11944	predicted gene 11944	40.1328	27.7337	1.43152	0.517547	0.357554	1
ENSMUSG00000020451	Limk2	LIM motif-containing protein kinase 2	346.115	339.812	1.01849	0.0264378	0.923473	1
ENSMUSG00000087055	Gm11948	predicted gene 11948	7.74586	4.26747	1.66035	0.731491	0.493289	1
ENSMUSG00000034579	Pla2g3	phospholipase A2, group III	21.3566	18.9074	1.12303	0.167391	0.954677	1
ENSMUSG00000087291	Gm11946	predicted gene 11946	59.8008	52.1398	1.14417	0.194297	0.651096	1
ENSMUSG00000034543	Morc2a	microrchidia 2A	579.947	526.457	1.10141	0.139352	0.651756	1
ENSMUSG00000020432	Tcn2	transcobalamin 2	8735.08	6376.88	1.36975	0.453908	0.0391275	1
ENSMUSG00000034493	4930556J24Rik	RIKEN cDNA 4930556J24 gene	16.1504	15.5255	1.03781	0.0535472	1	1
ENSMUSG00000049721	Gal3st1	galactose-3-O-sulfotransferase 1	200.428	160.356	1.24835	0.320024	0.297344	1
ENSMUSG00000004748	Mtfp1	mitochondrial fission process 1	108.232	93.2283	1.15922	0.21316	0.475036	1
ENSMUSG00000083838	Gm11957	predicted gene 11957	2.43333	1.95938	1.16015	0.214313	0.902229	1
ENSMUSG00000003581	Rnf215	ring finger protein 215	196.847	193.791	1.01569	0.0224653	0.858987	1
ENSMUSG00000093080	Mir3060	microRNA 3060	4.16491	2.37384	1.53087	0.614352	0.797406	1
ENSMUSG00000002129	Sf3a1	splicing factor 3a, subunit 1	931.026	907.2	1.02623	0.0373605	0.877813	1
ENSMUSG00000034412	Tbc1d10a	TBC1 domain family, member 10a	368.203	327.926	1.12245	0.166651	0.723146	1
ENSMUSG00000058755	Osm	oncostatin M	69.7672	67.9446	1.02644	0.0376442	0.968529	1
ENSMUSG00000034394	Lif	leukemia inhibitory factor	43.9152	37.0409	1.18071	0.239652	0.6551	1
ENSMUSG00000034354	Mtmr3	myotubularin related protein 3	1242.33	1235.84	1.00524	0.00754652	0.992942	1
ENSMUSG00000059534	Uqcr10	ubiquinol-cytochrome c reductase, complex III subunit X	1206.56	937.771	1.28632	0.363254	0.148342	1
ENSMUSG00000009076	Zmat5	zinc finger, matrin type 5	56.1971	51.6393	1.08659	0.119801	0.878032	1
ENSMUSG00000034285	Nipsnap1	nipsnap homolog 1	608.778	442.582	1.37467	0.459084	0.0518557	1
ENSMUSG00000034274	Thoc5	THO complex 5	262.594	242.701	1.08163	0.113207	0.793666	1
ENSMUSG00000009090	Ap1b1	adaptor protein complex AP-1, beta 1 subunit	1429.63	1367.36	1.04551	0.0642021	0.689806	1
ENSMUSG00000034209	Rasl10a	RAS-like, family 10, member A	35.5309	30.4211	1.16262	0.217383	0.818543	1
ENSMUSG00000034175	Rhbdd3	rhomboid domain containing 3	74.0905	55.7727	1.32265	0.403432	0.414865	1
ENSMUSG00000034164	Emid1	EMI domain containing 1	66.1546	53.3117	1.23647	0.306222	0.508711	1
ENSMUSG00000020393	Kremen1	kringle containing transmembrane protein 1	450.761	370.711	1.21536	0.281379	0.352366	1
ENSMUSG00000041961	Znrf3	zinc and ring finger 3	385.42	377.041	1.02216	0.031625	0.80126	1
ENSMUSG00000020482	Ccdc117	coiled-coil domain containing 117	532.433	422.381	1.25994	0.333349	0.232694	1
ENSMUSG00000081021	Gm11964	predicted gene 11964	497.547	489.85	1.01568	0.0224459	0.876434	1
ENSMUSG00000020477	Mrps24	mitochondrial ribosomal protein S24	415.54	347.969	1.19363	0.255358	0.317801	1
ENSMUSG00000083844	Ube2d-ps	ubiquitin-conjugating enzyme E2D, pseudogene	134.487	129.198	1.04062	0.0574414	0.800048	1
ENSMUSG00000020476	Dbnl	drebrin-like	761.599	690.709	1.10248	0.140758	0.565998	1
ENSMUSG00000080904	Gm11966	predicted gene 11966	389.331	258.681	1.50312	0.58796	0.0224217	1
ENSMUSG00000020471	Pold2	polymerase (DNA directed), delta 2, regulatory subunit	106.052	77.2789	1.36757	0.451614	0.230488	1
ENSMUSG00000083022	Rps15a-ps6	ribosomal protein S15A, pseudogene 6	200.293	151.674	1.31845	0.398843	0.150943	1
ENSMUSG00000083209	Gm11969	predicted gene 11969	5.24919	2.55253	1.75908	0.814823	0.567293	1
ENSMUSG00000004394	Tmed4	transmembrane p24 trafficking protein 4	604.346	598.172	1.0103	0.0147888	0.871949	1
ENSMUSG00000071866	Ppia	peptidylprolyl isomerase A	86.9386	75.499	1.14954	0.201055	0.639865	1
ENSMUSG00000041126	H2afv	H2A histone family, member V	303.264	297.073	1.02077	0.0296584	0.847328	1
ENSMUSG00000092885	Gm22123	predicted gene, 22123	21.2932	14.243	1.46252	0.548453	0.539851	1
ENSMUSG00000085156	Snhg15	small nucleolar RNA host gene 15	50.5248	41.5052	1.2122	0.277629	0.59549	1
ENSMUSG00000084231	Gm11975	predicted gene 11975	4.20796	1.31225	2.25234	1.17142	0.45148	1
ENSMUSG00000000384	Tbrg4	transforming growth factor beta regulated gene 4	311.22	303.163	1.02649	0.0377175	0.815553	1
ENSMUSG00000041046	Ramp3	receptor (calcitonin) activity modifying protein 3	82.0175	49.0356	1.65917	0.73046	0.112509	1
ENSMUSG00000083819	Gm11977	predicted gene 11977	47.5911	41.72	1.13743	0.18578	0.697897	1
ENSMUSG00000020427	Igfbp3	insulin-like growth factor binding protein 3	1247.74	1203.52	1.03671	0.0520144	0.900912	1
ENSMUSG00000040978	Gm11992	predicted gene 11992	147.427	101.069	1.45419	0.540214	0.158917	1
ENSMUSG00000020407	Upp1	uridine phosphorylase 1	132.977	128.562	1.03407	0.0483398	0.913139	1
ENSMUSG00000081629	Eif3s6-ps1	eukaryotic translation initiation factor 3, subunit 6, pseudogene 1	128.271	117.275	1.09297	0.128257	0.658661	1
ENSMUSG00000020193	Zpbp	zona pellucida binding protein	10.2539	5.20668	1.8132	0.858534	0.342533	1
ENSMUSG00000020191	4930415F15Rik	RIKEN cDNA 4930415F15 gene	4.13324	2.33786	1.53789	0.620948	0.731198	1
ENSMUSG00000073145	Gm12000	predicted gene 12000	18.6154	14.8713	1.23591	0.305569	0.778262	1
ENSMUSG00000035455	Fignl1	fidgetin-like 1	12.0172	7.14184	1.5988	0.67699	0.647414	1
ENSMUSG00000086391	1700042O10Rik	RIKEN cDNA 1700042O10 gene	3.61263	1.95038	1.5634	0.644687	0.735549	1
ENSMUSG00000020176	Grb10	growth factor receptor bound protein 10	541.754	524.334	1.03316	0.0470631	0.835263	1
ENSMUSG00000020173	Cobl	cordon-bleu WH2 repeat	1190.33	1111.95	1.07043	0.0981855	0.653598	1
ENSMUSG00000084183	Gm12009	predicted gene 12009	90.5601	84.389	1.07227	0.100669	0.90193	1
ENSMUSG00000084347	Akt2-ps	thymoma viral proto-oncogene 2, pseudogene	297.089	280.062	1.06058	0.0848526	0.749665	1
ENSMUSG00000020122	Egfr	epidermal growth factor receptor	968.712	848.192	1.14192	0.191464	0.384241	1
ENSMUSG00000085091	Egfros	epidermal growth factor receptor, opposite strand	66.0571	64.3114	1.02673	0.0380563	0.973069	1
ENSMUSG00000033953	Ppp3r1	protein phosphatase 3, regulatory subunit B, alpha isoform (calcineurin B, type I)	531.475	485.776	1.09388	0.129457	0.589071	1
ENSMUSG00000078970	Wdr92	WD repeat domain 92	73.5065	55.0406	1.32951	0.410893	0.372863	1
ENSMUSG00000081302	Gm12020	predicted gene 12020	10.6681	7.32131	1.4022	0.48769	0.607749	1
ENSMUSG00000020149	Rab1a	RAB1A, member RAS oncogene family	1966.48	1841.89	1.06761	0.0943794	0.681266	1
ENSMUSG00000044066	Cep68	centrosomal protein 68	527.595	510.708	1.033	0.0468437	0.88255	1
ENSMUSG00000078965	Gm12033	predicted gene 12033	20.0822	7.3182	2.53447	1.34168	0.134762	1
ENSMUSG00000049800	Sertad2	SERTA domain containing 2	598.449	547.412	1.09306	0.128377	0.638686	1
ENSMUSG00000084252	Gm12036	predicted gene 12036	7.43805	7.25834	1.02176	0.0310574	0.944003	1
ENSMUSG00000084259	Gm12040	predicted gene 12040	5.0364	3.34903	1.38799	0.472993	0.789598	1
ENSMUSG00000001891	Ugp2	UDP-glucose pyrophosphorylase 2	822.343	654.367	1.25631	0.329191	0.196245	1
ENSMUSG00000020321	Mdh1	malate dehydrogenase 1, NAD (soluble)	6244.97	5140.04	1.21492	0.280865	0.185669	1
ENSMUSG00000049904	Tmem17	transmembrane protein 17	24.4169	12.3701	1.90103	0.926781	0.261535	1
ENSMUSG00000084081	Gm12057	predicted gene 12057	15.7476	11.8751	1.30077	0.37937	0.679927	1
ENSMUSG00000051355	Commd1	COMM domain containing 1	515.198	433.238	1.18874	0.249438	0.299552	1
ENSMUSG00000051650	B3gnt2	UDP-GlcNAc:betaGal beta-1,3-N-acetylglucosaminyltransferase 2	73.8574	55.0623	1.33525	0.417114	0.39974	1
ENSMUSG00000077621	Gm23772	predicted gene, 23772	12.9951	8.63945	1.45185	0.537895	0.605387	1
ENSMUSG00000092626	9130230N09Rik	RIKEN cDNA 9130230N09 gene	55.5929	39.048	1.41312	0.498889	0.336402	1
ENSMUSG00000007739	Cct4	chaperonin containing Tcp1, subunit 4 (delta)	782.048	777.761	1.00551	0.00792119	0.905652	1
ENSMUSG00000049811	Fam161a	family with sequence similarity 161, member A	104.619	67.3336	1.54564	0.628203	0.0954787	1
ENSMUSG00000089103	Gm23114	predicted gene, 23114	2.6778	1.80412	1.31157	0.391294	0.740948	1
ENSMUSG00000032985	5730522E02Rik	RIKEN cDNA 5730522E02 gene	5.66341	4.75668	1.15751	0.211024	0.891983	1
ENSMUSG00000004018	Fancl	Fanconi anemia, complementation group L	62.5623	37.9503	1.63188	0.706535	0.157274	1
ENSMUSG00000032889	Gm6685	predicted pseudogene 6685	44.7866	39.4174	1.13285	0.179951	0.680276	1
ENSMUSG00000032878	Ccdc85a	coiled-coil domain containing 85A	62.7117	61.5525	1.01853	0.0264913	0.997556	1
ENSMUSG00000020467	Efemp1	epidermal growth factor-containing fibulin-like extracellular matrix protein 1	183.044	171.08	1.06953	0.0969743	0.821115	1
ENSMUSG00000020464	Pnpt1	polyribonucleotide nucleotidyltransferase 1	367.354	349.504	1.05093	0.07166	0.724107	1
ENSMUSG00000020463	Ppp4r3b	protein phosphatase 4 regulatory subunit 3B	712.747	665.569	1.07078	0.0986585	0.69263	1
ENSMUSG00000020462	Cfap36	cilia and flagella associated protein 36	569.181	472.69	1.2037	0.267476	0.355984	1
ENSMUSG00000032673	Prorsd1	prolyl-tRNA synthetase domain containing 1	133.169	117.478	1.13244	0.179435	0.552587	1
ENSMUSG00000073073	Gm8098	predicted gene 8098	28.901	22.6795	1.26274	0.336557	0.645614	1
ENSMUSG00000040919	4930505A04Rik	RIKEN cDNA 4930505A04 gene	5.41894	0.638132	3.91845	1.97028	0.218627	1
ENSMUSG00000060923	Acyp2	acylphosphatase 2, muscle type	55.9323	54.1171	1.03293	0.0467484	0.899901	1
ENSMUSG00000081712	Gm12096	predicted gene 12096	18.3393	12.7126	1.41033	0.496035	0.604885	1
ENSMUSG00000081887	Gm12097	predicted gene 12097	136.132	127.611	1.06625	0.0925516	0.903149	1
ENSMUSG00000020309	Chac2	ChaC, cation transport regulator 2	148.482	111.986	1.32301	0.403829	0.290483	1
ENSMUSG00000020303	Stc2	stanniocalcin 2	50.2056	29.958	1.65403	0.725988	0.146384	1
ENSMUSG00000020300	Cpeb4	cytoplasmic polyadenylation element binding protein 4	2917.98	2592.73	1.1254	0.170435	0.475208	1
ENSMUSG00000040767	Snrnp25	small nuclear ribonucleoprotein 25 (U11/U12)	47.6342	38.7405	1.22379	0.291361	0.4993	1
ENSMUSG00000020289	Nprl3	nitrogen permease regulator-like 3	178.549	163.983	1.08829	0.122058	0.734052	1
ENSMUSG00000069919	Hba-a1	hemoglobin alpha, adult chain 1	994.449	786.773	1.26362	0.337568	0.733415	1
ENSMUSG00000044056	Efcab9	EF-hand calcium binding domain 9	5.83315	1.40765	2.83811	1.50493	0.333033	1
ENSMUSG00000020272	Stk10	serine/threonine kinase 10	1149.04	1100.6	1.04397	0.0620839	0.893519	1
ENSMUSG00000081254	Gm12112	predicted gene 12112	35.6487	33.3032	1.06838	0.0954204	0.894816	1
ENSMUSG00000057967	Fgf18	fibroblast growth factor 18	9.20131	5.06675	1.68151	0.749759	0.600499	1
ENSMUSG00000057113	Npm1	nucleophosmin 1	319.455	282.931	1.12864	0.174582	0.528781	1
ENSMUSG00000040594	Ranbp17	RAN binding protein 17	21.4427	15.1461	1.38997	0.475053	0.411071	1
ENSMUSG00000082309	Gm12123	predicted gene 12123	7.91561	3.96917	1.79418	0.843328	0.599996	1
ENSMUSG00000018849	Wwc1	WW, C2 and coiled-coil domain containing 1	3542.67	3049.35	1.16173	0.21627	0.353289	1
ENSMUSG00000020330	Hmmr	hyaluronan mediated motility receptor (RHAMM)	21.6758	17.562	1.22162	0.2888	0.814215	1
ENSMUSG00000020328	Nudcd2	NudC domain containing 2	205.028	151.192	1.35373	0.436943	0.197274	1
ENSMUSG00000020326	Ccng1	cyclin G1	1603.37	1536.47	1.04351	0.0614443	0.748449	1
ENSMUSG00000055415	Atp10b	ATPase, class V, type 10B	100.613	98.3098	1.02319	0.0330711	0.922424	1
ENSMUSG00000084889	Gm12148	predicted gene 12148	3.12368	1.93239	1.40625	0.491858	0.895472	1
ENSMUSG00000020415	Pttg1	pituitary tumor-transforming gene 1	160.413	159.241	1.00732	0.0105186	0.896673	1
ENSMUSG00000020409	Slu7	SLU7 splicing factor homolog (S. cerevisiae)	1376.02	1350.86	1.01861	0.0266016	0.864973	1
ENSMUSG00000044707	Ccnjl	cyclin J-like	24.0141	21.7007	1.10191	0.140001	0.77465	1
ENSMUSG00000041278	Ttc1	tetratricopeptide repeat domain 1	420.873	389.514	1.0803	0.111434	0.635499	1
ENSMUSG00000050541	Adra1b	adrenergic receptor, alpha 1b	6.77936	3.0745	1.90928	0.93303	0.369812	1
ENSMUSG00000080981	Gm12161	predicted gene 12161	30.1867	25.6851	1.16869	0.224896	0.723398	1
ENSMUSG00000011254	Thg1l	tRNA-histidine guanylyltransferase 1-like (S. cerevisiae)	50.8009	38.3302	1.31708	0.397342	0.430443	1
ENSMUSG00000069899	Gm12166	predicted gene 12166	4.65385	3.63211	1.22058	0.287564	0.921184	1
ENSMUSG00000020340	Cyfip2	cytoplasmic FMR1 interacting protein 2	7384.38	7070.69	1.04436	0.0626165	0.684058	1
ENSMUSG00000081078	Gm12568	predicted gene 12568	35.2864	32.3711	1.08736	0.120833	0.947185	1
ENSMUSG00000020395	Itk	IL2 inducible T cell kinase	131.42	118.162	1.11126	0.15219	0.765435	1
ENSMUSG00000055546	Timd4	T cell immunoglobulin and mucin domain containing 4	15.8426	15.373	1.02868	0.0407922	1	1
ENSMUSG00000020372	Rack1	receptor for activated C kinase 1	2581.11	2360.41	1.09346	0.128899	0.525162	1
ENSMUSG00000078154	Gm12184	predicted gene 12184	80.0642	75.7584	1.05609	0.0787396	0.738287	1
ENSMUSG00000040350	Trim7	tripartite motif-containing 7	1008.62	794.102	1.26979	0.344594	0.47685	1
ENSMUSG00000086245	Gm16170	predicted gene 16170	171.661	140.747	1.21809	0.284617	0.702607	1
ENSMUSG00000046879	Irgm1	immunity-related GTPase family M member 1	765.111	731.674	1.04564	0.0643822	0.942284	1
ENSMUSG00000058163	Gm5431	predicted gene 5431	37.5297	30.4946	1.22337	0.290865	0.70092	1
ENSMUSG00000048852	Gm12185	predicted gene 12185	42.6408	24.1254	1.73692	0.796531	0.153898	1
ENSMUSG00000078153	Psme2b	protease (prosome, macropain) activator subunit 2B	342.344	306.292	1.11732	0.160047	0.583267	1
ENSMUSG00000069893	9930111J21Rik1	RIKEN cDNA 9930111J21 gene 1	184.588	179.956	1.0256	0.0364701	0.843547	1
ENSMUSG00000078922	Tgtp1	T cell specific GTPase 1	65.9621	46.4615	1.41087	0.496586	0.32747	1
ENSMUSG00000082116	Gm12188	predicted gene 12188	3.82542	3.50384	1.0714	0.0994991	0.865585	1
ENSMUSG00000047511	Olfr1396	olfactory receptor 1396	15.2042	7.12741	1.99377	0.995501	0.596101	1
ENSMUSG00000020346	Mgat1	mannoside acetylglucosaminyltransferase 1	771.113	673.821	1.14417	0.194306	0.429899	1
ENSMUSG00000020357	Flt4	FMS-like tyrosine kinase 4	417.884	351.107	1.18965	0.250536	0.410245	1
ENSMUSG00000064057	Scgb3a1	secretoglobin, family 3A, member 1	8.05368	1.9144	3.10654	1.63531	0.372712	1
ENSMUSG00000020362	Cnot6	CCR4-NOT transcription complex, subunit 6	682.515	626.319	1.08958	0.123774	0.656853	1
ENSMUSG00000083061	Gm12191	predicted gene 12191	298.694	280.995	1.06276	0.0878211	0.675396	1
ENSMUSG00000081570	Gm12192	predicted gene 12192	4.86665	2.25145	1.80432	0.851452	0.559875	1
ENSMUSG00000020363	Gfpt2	glutamine fructose-6-phosphate transaminase 2	47.9103	39.8832	1.19634	0.258632	0.617266	1
ENSMUSG00000020366	Mapk9	mitogen-activated protein kinase 9	562.608	450.758	1.24759	0.319142	0.205728	1
ENSMUSG00000020374	Rasgef1c	RasGEF domain family, member 1C	4.10157	2.26045	1.56468	0.645869	0.676408	1
ENSMUSG00000020376	Rnf130	ring finger protein 130	694.661	639.419	1.08626	0.11937	0.66002	1
ENSMUSG00000065417	Mir340	microRNA 340	3.12368	2.60651	1.1434	0.193333	1	1
ENSMUSG00000036644	Tbc1d9b	TBC1 domain family, member 9B	1257.36	1170.85	1.07382	0.102755	0.636679	1
ENSMUSG00000036620	Mgat4b	mannoside acetylglucosaminyltransferase 4, isoenzyme B	698.527	677.84	1.03047	0.0433094	0.805979	1
ENSMUSG00000020377	Ltc4s	leukotriene C4 synthase	34.6708	27.0928	1.26975	0.344546	0.548832	1
ENSMUSG00000020375	Rufy1	RUN and FYVE domain containing 1	713.394	696.925	1.0236	0.0336486	0.889939	1
ENSMUSG00000048728	Zfp454	zinc finger protein 454	44.755	43.0298	1.03918	0.05545	0.931546	1
ENSMUSG00000020364	Zfp354a	zinc finger protein 354A	70.2561	63.7106	1.10115	0.139012	0.720116	1
ENSMUSG00000045942	BC049762	cDNA sequence BC049762	3.44288	3.00609	1.10903	0.149301	0.803697	1
ENSMUSG00000093734	Gm25082	predicted gene, 25082	8.20313	7.81907	1.04355	0.0614989	0.927857	1
ENSMUSG00000063564	Col23a1	collagen, type XXIII, alpha 1	82.4	78.665	1.04688	0.0661019	1	1
ENSMUSG00000001053	N4bp3	NEDD4 binding protein 3	219.404	203.543	1.07754	0.107743	0.795799	1
ENSMUSG00000036391	Sec24a	Sec24 related gene family, member A (S. cerevisiae)	647.924	591.992	1.09432	0.130037	0.570245	1
ENSMUSG00000020386	Sar1b	secretion associated Ras related GTPase 1B	313.047	295.797	1.05812	0.0815017	0.798881	1
ENSMUSG00000020392	Cdkn2aipnl	CDKN2A interacting protein N-terminal like	182.089	127.554	1.42422	0.510167	0.112884	1
ENSMUSG00000020390	Ube2b	ubiquitin-conjugating enzyme E2B	695.843	626.679	1.11019	0.150807	0.492254	1
ENSMUSG00000086493	Gm12204	predicted gene 12204	5.0364	2.77031	1.60103	0.679004	0.660396	1
ENSMUSG00000020349	Ppp2ca	protein phosphatase 2 (formerly 2A), catalytic subunit, alpha isoform	1975.33	1938.36	1.01906	0.0272451	0.823676	1
ENSMUSG00000036309	Skp1a	S-phase kinase-associated protein 1A	2081.26	1961.07	1.06126	0.0857717	0.620673	1
ENSMUSG00000020402	Vdac1	voltage-dependent anion channel 1	3510.52	3237.09	1.08444	0.116951	0.586658	1
ENSMUSG00000036275	9530068E07Rik	RIKEN cDNA 9530068E07 gene	1180.02	1127.65	1.0464	0.0654303	0.715898	1
ENSMUSG00000058073	Gm11189	predicted gene 11189	17.6059	11.335	1.50838	0.592998	0.538747	1
ENSMUSG00000064719	Gm25930	predicted gene, 25930	7.11885	3.41744	1.83791	0.878065	0.546731	1
ENSMUSG00000044352	Sowaha	sosondowah ankyrin repeat domain family member A	77.2458	50.75	1.512	0.596456	0.253612	1
ENSMUSG00000018395	Kif3a	kinesin family member 3A	396.083	328.622	1.20466	0.268629	0.337426	1
ENSMUSG00000000869	Il4	interleukin 4	7.395	0.638132	5.12474	2.35748	0.119484	1
ENSMUSG00000036117	Il5	interleukin 5	4.59051	3.59069	1.21779	0.284267	0.811263	1
ENSMUSG00000018900	Slc22a5	solute carrier family 22 (organic cation transporter), member 5	1496.88	1137.1	1.31613	0.396299	0.148154	1
ENSMUSG00000063652	Slc22a21	solute carrier family 22 (organic cation transporter), member 21	45.3503	38.697	1.1676	0.22355	0.701736	1
ENSMUSG00000080768	Gm12219	predicted gene 12219	11.4218	7.00813	1.55115	0.633341	0.697147	1
ENSMUSG00000020334	Slc22a4	solute carrier family 22 (organic cation transporter), member 4	459.476	374.295	1.22697	0.295101	0.316271	1
ENSMUSG00000020388	Pdlim4	PDZ and LIM domain 4	17.9998	14.982	1.18882	0.249534	0.758518	1
ENSMUSG00000036045	Gm12221	predicted gene 12221	15.4284	12.0896	1.25507	0.327764	0.613594	1
ENSMUSG00000020333	Acsl6	acyl-CoA synthetase long-chain family member 6	4.27131	3.39945	1.19818	0.260839	0.931055	1
ENSMUSG00000088437	Gm24198	predicted gene, 24198	7.46972	3.55471	1.85955	0.894956	0.518838	1
ENSMUSG00000093341	Gm26116	predicted gene, 26116	3.7507	1.93239	1.62008	0.696063	0.733077	1
ENSMUSG00000052298	Cdc42se2	CDC42 small effector 2	714.35	677.776	1.05388	0.0757139	0.834173	1
ENSMUSG00000020267	Hint1	histidine triad nucleotide binding protein 1	1536.82	1302.02	1.1802	0.239034	0.265526	1
ENSMUSG00000018339	Gpx3	glutathione peroxidase 3	116220	90348.3	1.28635	0.363287	0.278155	1
ENSMUSG00000020400	Tnip1	TNFAIP3 interacting protein 1	752.135	653.709	1.15034	0.202054	0.442695	1
ENSMUSG00000082180	Gm12230	predicted gene 12230	11.0076	5.7674	1.77433	0.827276	0.465828	1
ENSMUSG00000018340	Anxa6	annexin A6	1033.31	871.333	1.18568	0.245713	0.287841	1
ENSMUSG00000000594	Gm2a	GM2 ganglioside activator protein	2158.19	1681.64	1.28322	0.359769	0.107108	1
ENSMUSG00000044751	Gm12231	predicted gene 12231	1821.26	1490.76	1.22155	0.288712	0.244425	1
ENSMUSG00000085531	Slc36a3os	solute carrier family 36 (proton/amino acid symporter), member 3, opposite strand	5.14279	3.63522	1.32524	0.406256	0.723176	1
ENSMUSG00000018585	Atox1	antioxidant 1 copper chaperone	452.581	356.491	1.26879	0.343456	0.166695	1
ENSMUSG00000020523	Fam114a2	family with sequence similarity 114, member A2	616.424	566.625	1.08773	0.121322	0.668547	1
ENSMUSG00000020522	Mfap3	microfibrillar-associated protein 3	347.091	298.757	1.16124	0.215668	0.502303	1
ENSMUSG00000085719	4933424L21Rik	RIKEN cDNA 4933424L21 gene	7.54445	3.89177	1.7467	0.804632	0.494813	1
ENSMUSG00000086933	4933426K07Rik	RIKEN cDNA 4933426K07 gene	20.0822	17.7047	1.12711	0.172629	0.91546	1
ENSMUSG00000077155	Gm24582	predicted gene, 24582	4.76025	3.28917	1.34298	0.425434	0.724668	1
ENSMUSG00000087165	2010001A14Rik	RIKEN cDNA 2010001A14 gene	26.0104	15.6834	1.61899	0.695098	0.397118	1
ENSMUSG00000020519	Sap30l	SAP30-like	305.407	302.929	1.00815	0.0117163	0.946561	1
ENSMUSG00000083657	Gm12245	predicted gene 12245	7.36332	7.23169	1.01599	0.0228882	0.898359	1
ENSMUSG00000081223	Gm12247	predicted gene 12247	6.35377	2.94356	1.86475	0.898984	0.598657	1
ENSMUSG00000020515	Cnot8	CCR4-NOT transcription complex, subunit 8	519.872	406.712	1.27755	0.35338	0.186943	1
ENSMUSG00000037275	Gemin5	gem nuclear organelle associated protein 5	305.048	295.521	1.03213	0.0456217	0.863607	1
ENSMUSG00000082292	Gm12250	predicted gene 12250	95.6168	43.1242	2.18965	1.1307	0.0338094	1
ENSMUSG00000069874	Irgm2	immunity-related GTPase family M member 2	447.169	342.628	1.30422	0.383192	0.332076	1
ENSMUSG00000037243	Zfp692	zinc finger protein 692	162.048	154.751	1.04684	0.0660476	0.879307	1
ENSMUSG00000049755	Zfp672	zinc finger protein 672	411.108	369.84	1.11128	0.152226	0.538815	1
ENSMUSG00000013646	Sh3bp5l	SH3 binding domain protein 5 like	317.81	306	1.03847	0.0544571	0.799357	1
ENSMUSG00000084384	Gm12251	predicted gene 12251	308.939	302.145	1.02241	0.0319755	0.732313	1
ENSMUSG00000037001	Zfp39	zinc finger protein 39	109.006	98.661	1.1038	0.142478	0.861695	1
ENSMUSG00000020496	Rnf187	ring finger protein 187	1193.29	1170.8	1.0192	0.0274322	0.866341	1
ENSMUSG00000036964	Trim17	tripartite motif-containing 17	18.0631	17.7258	1.01801	0.0257588	0.975636	1
ENSMUSG00000080152	Gm12260	predicted gene 12260	5.8762	2.91658	1.75567	0.81202	0.525818	1
ENSMUSG00000020455	Trim11	tripartite motif-containing 11	336.771	328.631	1.02469	0.0351943	0.949869	1
ENSMUSG00000049287	Iba57	IBA57 homolog, iron-sulfur cluster assembly	136.005	116.915	1.1619	0.216486	0.506564	1
ENSMUSG00000020444	Guk1	guanylate kinase 1	359.375	312.79	1.14846	0.199698	0.406992	1
ENSMUSG00000036860	Mrpl55	mitochondrial ribosomal protein L55	191.075	154.301	1.2368	0.306607	0.385435	1
ENSMUSG00000020441	2310033P09Rik	RIKEN cDNA 2310033P09 gene	215.868	199.646	1.08085	0.112168	0.681782	1
ENSMUSG00000000126	Wnt9a	wingless-type MMTV integration site family, member 9A	15.7362	9.87106	1.53952	0.622479	0.451382	1
ENSMUSG00000009894	Snap47	synaptosomal-associated protein, 47	492.202	442.032	1.11324	0.154769	0.566252	1
ENSMUSG00000036819	Jmjd4	jumonji domain containing 4	221.955	194.007	1.14332	0.193224	0.504036	1
ENSMUSG00000054519	Zfp867	zinc finger protein 867	69.7242	64.5369	1.07915	0.109896	0.850809	1
ENSMUSG00000020472	Zkscan17	zinc finger with KRAB and SCAN domains 17	289.947	268.366	1.08012	0.111192	0.667676	1
ENSMUSG00000081262	Gm12261	predicted gene 12261	8.78709	3.91875	1.98975	0.992588	0.470088	1
ENSMUSG00000032633	Flcn	folliculin	524.069	442.092	1.18501	0.244901	0.362019	1
ENSMUSG00000019373	Cops3	COP9 signalosome subunit 3	291.009	220.278	1.31965	0.400151	0.201168	1
ENSMUSG00000032615	Nt5m	5',3'-nucleotidase, mitochondrial	83.516	72.6238	1.14794	0.199051	0.715047	1
ENSMUSG00000061650	Med9	mediator complex subunit 9	146.918	135.761	1.08158	0.113138	0.70778	1
ENSMUSG00000000301	Pemt	phosphatidylethanolamine N-methyltransferase	6.84271	3.53083	1.73097	0.791577	0.548821	1
ENSMUSG00000062115	Rai1	retinoic acid induced 1	746.112	729.9	1.02218	0.0316507	0.912347	1
ENSMUSG00000020538	Srebf1	sterol regulatory element binding transcription factor 1	645.241	498.482	1.29382	0.37164	0.141653	1
ENSMUSG00000082148	Gm12266	predicted gene 12266	56.1135	53.5745	1.04652	0.0656044	0.883198	1
ENSMUSG00000056598	Drc3	dynein regulatory complex subunit 3	37.6881	35.9737	1.04637	0.0653883	0.887946	1
ENSMUSG00000042709	Atpaf2	ATP synthase mitochondrial F1 complex assembly factor 2	236.213	204.864	1.15228	0.204487	0.553961	1
ENSMUSG00000018415	Gid4	GID complex subunit 4, VID24 homolog	297.385	292.899	1.01526	0.0218538	0.935848	1
ENSMUSG00000084249	Gm12267	predicted gene 12267	4.76025	2.29644	1.74742	0.805225	0.606932	1
ENSMUSG00000020537	Drg2	developmentally regulated GTP binding protein 2	356.835	242.585	1.46904	0.554871	0.0484861	1
ENSMUSG00000042678	Myo15	myosin XV	14.9711	11.1087	1.31898	0.399423	0.727412	1
ENSMUSG00000042650	Alkbh5	alkB homolog 5, RNA demethylase	2762.53	2660.1	1.03849	0.0544875	0.778635	1
ENSMUSG00000018599	Mief2	mitochondrial elongation factor 2	106.244	93.6488	1.13308	0.180245	0.605608	1
ENSMUSG00000020534	Shmt1	serine hydroxymethyltransferase 1 (soluble)	935.482	698.206	1.33935	0.421535	0.0787796	1
ENSMUSG00000042569	Dhrs7b	dehydrogenase/reductase (SDR family) member 7B	161.167	136.111	1.18275	0.24214	0.485884	1
ENSMUSG00000043284	Tmem11	transmembrane protein 11	200.705	198.687	1.0101	0.0145019	0.939545	1
ENSMUSG00000018931	Natd1	N-acetyltransferase domain containing 1	280.194	227.547	1.23035	0.299071	0.293661	1
ENSMUSG00000042549	Map2k3os	mitogen-activated protein kinase kinase 3, opposite strand	23.9393	16.989	1.38636	0.471306	0.480647	1
ENSMUSG00000042529	Kcnj12	potassium inwardly-rectifying channel, subfamily J, member 12	32.3869	26.825	1.19989	0.262902	0.625006	1
ENSMUSG00000042506	Usp22	ubiquitin specific peptidase 22	940.078	887.702	1.05894	0.0826141	0.735149	1
ENSMUSG00000069855	Slc47a2	solute carrier family 47, member 2	3.36815	2.93457	1.1102	0.150819	1	1
ENSMUSG00000001039	B9d1	B9 protein domain 1	63.4654	57.3978	1.1039	0.14261	0.840346	1
ENSMUSG00000085459	Gm12272	predicted gene 12272	6.2157	5.97308	1.03479	0.0493427	1	1
ENSMUSG00000004837	Grap	GRB2-related adaptor protein	139.534	105.496	1.31962	0.400127	0.279751	1
ENSMUSG00000042371	Slc5a10	solute carrier family 5 (sodium/glucose cotransporter), member 10	429.245	271.178	1.58075	0.660607	0.0850224	1
ENSMUSG00000042377	Fam83g	family with sequence similarity 83, member G	397.74	271.209	1.46483	0.55073	0.348971	1
ENSMUSG00000004798	Ulk2	unc-51 like kinase 2	637.135	628.102	1.01436	0.0205682	0.975968	1
ENSMUSG00000018500	Adora2b	adenosine A2b receptor	22.8664	20.842	1.09268	0.127876	0.756031	1
ENSMUSG00000014243	Zswim7	zinc finger SWIM-type containing 7	40.2278	14.3735	2.68174	1.42317	0.025251	1
ENSMUSG00000081340	Gm12275	predicted gene 12275	9.48883	7.28222	1.26643	0.340765	0.744557	1
ENSMUSG00000081944	Gm12276	predicted gene 12276	23.6632	23.0282	1.02643	0.0376313	0.876463	1
ENSMUSG00000014245	Pigl	phosphatidylinositol glycan anchor biosynthesis, class L	90.8476	78.3749	1.15714	0.210559	0.67058	1
ENSMUSG00000086310	Gm12278	predicted gene 12278	2.5714	1.93239	1.21791	0.284412	0.90118	1
ENSMUSG00000019505	Ubb	ubiquitin B	6379.71	6238.11	1.0227	0.0323776	0.828073	1
ENSMUSG00000085748	Gm12280	predicted gene 12280	6.76798	6.48927	1.03721	0.0527141	0.954379	1
ENSMUSG00000086841	2410006H16Rik	RIKEN cDNA 2410006H16 gene	145.189	136.286	1.06485	0.0906488	0.79647	1
ENSMUSG00000064437	Snord49b	small nucleolar RNA, C/D box 49B	7.92699	5.24855	1.42865	0.514653	0.57732	1
ENSMUSG00000046417	Lrrc75a	leucine rich repeat containing 75A	60.6926	49.7896	1.21467	0.280566	0.641703	1
ENSMUSG00000085170	Lrrc75aos1	leucine rich repeat containing 75A, opposite strand 1	3.12368	1.61332	1.57795	0.658049	0.812048	1
ENSMUSG00000047342	Zfp286	zinc finger protein 286	25.9471	12.1225	2.0535	1.03808	0.168088	1
ENSMUSG00000090173	Fbxw10	F-box and WD-40 domain protein 10	11.741	7.75654	1.45503	0.541049	0.686465	1
ENSMUSG00000014177	Tvp23b	trans-golgi network vesicle protein 23B	241.315	228.456	1.05604	0.0786667	0.763096	1
ENSMUSG00000081455	Hmgb1-ps3	high mobility group box 1, pseudogene 3	2.84754	2.14118	1.22487	0.292632	0.895102	1
ENSMUSG00000070407	Hs3st3b1	heparan sulfate (glucosamine) 3-O-sulfotransferase 3B1	240.394	232.184	1.03521	0.049919	0.740061	1
ENSMUSG00000086359	9630013K17Rik	RIKEN cDNA 9630013K17 gene	8.61735	3.22665	2.27541	1.18613	0.356106	1
ENSMUSG00000033352	Map2k4	mitogen-activated protein kinase kinase 4	531.688	514.17	1.034	0.0482419	0.820268	1
ENSMUSG00000020910	Adprm	ADP-ribose/CDP-alcohol diphosphatase, manganese dependent	105.266	98.852	1.06424	0.0898227	0.835689	1
ENSMUSG00000033066	Gas7	growth arrest specific 7	342.695	322.115	1.06369	0.0890806	0.744215	1
ENSMUSG00000020905	Usp43	ubiquitin specific peptidase 43	47.6342	40.4377	1.17367	0.231028	0.689333	1
ENSMUSG00000055134	9130017K11Rik	RIKEN cDNA 9130017K11 gene	16.2999	6.84699	2.20465	1.14055	0.174782	1
ENSMUSG00000020904	Cfap52	cilia and flagella associated protein 52	60.7356	42.3343	1.42464	0.510594	0.232986	1
ENSMUSG00000087242	C78197	expressed sequence C78197	26.8933	18.8355	1.40623	0.491835	0.481116	1
ENSMUSG00000020901	Pik3r5	phosphoinositide-3-kinase regulatory subunit 5	271.248	242.061	1.12008	0.163605	0.716849	1
ENSMUSG00000046207	Pik3r6	phosphoinositide-3-kinase regulatory subunit 5	107.924	96.0697	1.12212	0.166228	0.674179	1
ENSMUSG00000018736	Ndel1	nudE neurodevelopment protein 1 like 1	1490.31	1431	1.04142	0.0585489	0.877388	1
ENSMUSG00000060938	Rpl26	ribosomal protein L26	564.023	494.604	1.14007	0.189122	0.407777	1
ENSMUSG00000052921	Arhgef15	Rho guanine nucleotide exchange factor (GEF) 15	660.613	591.249	1.11712	0.159784	0.620402	1
ENSMUSG00000020898	Ctc1	CTS telomere maintenance complex component 1	239.9	224.119	1.0701	0.0977463	0.816431	1
ENSMUSG00000072809	9330160F10Rik	RIKEN cDNA 9330160F10 gene	23.2376	18.1793	1.26373	0.337693	0.713471	1
ENSMUSG00000020895	Tmem107	transmembrane protein 107	24.2471	22.1277	1.09164	0.126496	0.880781	1
ENSMUSG00000020893	Per1	period circadian clock 1	1650.48	1487.49	1.1095	0.149914	0.657411	1
ENSMUSG00000049299	Trappc1	trafficking protein particle complex 1	92.2828	88.0235	1.04784	0.067424	0.758438	1
ENSMUSG00000018470	Kcnab3	potassium voltage-gated channel, shaker-related subfamily, beta member 3	26.0104	10.6015	2.32819	1.21921	0.131935	1
ENSMUSG00000059278	Naa38	N(alpha)-acetyltransferase 38, NatC auxiliary subunit	258.455	239.778	1.07757	0.107778	0.663739	1
ENSMUSG00000069835	Sat2	spermidine/spermine N1-acetyl transferase 2	110.771	85.3969	1.2937	0.3715	0.400752	1
ENSMUSG00000018765	Fxr2	fragile X mental retardation, autosomal homolog 2	616.648	563.024	1.09507	0.131029	0.595388	1
ENSMUSG00000018774	Cd68	CD68 antigen	345.842	301.1	1.1481	0.199248	0.629749	1
ENSMUSG00000089542	Gm25835	predicted gene, 25835	1022.75	942.4	1.08517	0.117924	0.64068	1
ENSMUSG00000085890	Tnfsf13os	tumor necrosis factor (ligand) superfamily, member 13, opposite strand	8.61735	7.15395	1.17947	0.238141	0.837655	1
ENSMUSG00000018752	Tnfsfm13	tumor necrosis factor (ligand) superfamily, membrane-bound member 13	115.572	70.2211	1.63677	0.710848	0.0995065	1
ENSMUSG00000081333	Gm12307	predicted gene 12307	7.25692	2.58851	2.30093	1.20222	0.439145	1
ENSMUSG00000051790	Nlgn2	neuroligin 2	115.224	92.7334	1.23994	0.310273	0.51789	1
ENSMUSG00000070394	Tmem256	transmembrane protein 256	346.688	238.807	1.44987	0.53592	0.069134	1
ENSMUSG00000001583	Tnk1	tyrosine kinase, non-receptor, 1	64.6878	55.9897	1.15262	0.204922	0.686119	1
ENSMUSG00000023170	Gps2	G protein pathway suppressor 2	664.167	589.778	1.12592	0.171101	0.537326	1
ENSMUSG00000078812	Eif5a	eukaryotic translation initiation factor 5A	1670.89	1626.87	1.02704	0.0384895	0.849036	1
ENSMUSG00000018559	Ctdnep1	CTD nuclear envelope phosphatase 1	230.635	222.204	1.03777	0.0534928	0.845371	1
ENSMUSG00000018567	Gabarap	gamma-aminobutyric acid receptor associated protein	1134.98	1092	1.03933	0.0556477	0.768073	1
ENSMUSG00000020888	Dvl2	dishevelled segment polarity protein 2	200.831	165.642	1.21117	0.276401	0.471285	1
ENSMUSG00000018574	Acadvl	acyl-Coenzyme A dehydrogenase, very long chain	947.387	888.86	1.06577	0.091897	0.669574	1
ENSMUSG00000040950	Mgl2	macrophage galactose N-acetyl-galactosamine specific lectin 2	303.733	292.857	1.03701	0.0524296	0.865248	1
ENSMUSG00000000318	Clec10a	C-type lectin domain family 10, member A	62.9878	56.4147	1.11448	0.156377	0.82877	1
ENSMUSG00000000317	Bcl6b	B cell CLL/lymphoma 6, member B	230.871	184.577	1.24946	0.321301	0.333116	1
ENSMUSG00000040904	Gm21988	predicted gene 21988	595.685	533.829	1.11566	0.157893	0.461408	1
ENSMUSG00000000320	Alox12	arachidonate 12-lipoxygenase	126.741	114.825	1.10288	0.141274	0.706087	1
ENSMUSG00000082145	Gm12312	predicted gene 12312	98.0729	97.1157	1.00976	0.0140054	0.944213	1
ENSMUSG00000018921	Pelp1	proline, glutamic acid and leucine rich protein 1	336.158	266.154	1.26204	0.335754	0.248548	1
ENSMUSG00000060216	Arrb2	arrestin, beta 2	367.112	341.937	1.07341	0.102201	0.796812	1
ENSMUSG00000018920	Cxcl16	chemokine (C-X-C motif) ligand 16	1444.03	1355.28	1.06544	0.091449	0.761798	1
ENSMUSG00000040829	Zmynd15	zinc finger, MYND-type containing 15	302.367	240.486	1.25625	0.329129	0.328427	1
ENSMUSG00000018286	Psmb6	proteasome (prosome, macropain) subunit, beta type 6	667.852	620.368	1.07642	0.106239	0.645508	1
ENSMUSG00000020828	Pld2	phospholipase D2	228.098	154.141	1.47671	0.56239	0.0956027	1
ENSMUSG00000014606	Slc25a11	solute carrier family 25 (mitochondrial carrier oxoglutarate carrier), member 11	826.024	709.512	1.16398	0.21907	0.313396	1
ENSMUSG00000060600	Eno3	enolase 3, beta muscle	64.2305	46.4354	1.37514	0.459582	0.37842	1
ENSMUSG00000018287	Spag7	sperm associated antigen 7	490.482	449.298	1.09146	0.126257	0.567461	1
ENSMUSG00000057054	Inca1	inhibitor of CDK, cyclin A1 interacting protein 1	25.4695	24.272	1.04738	0.0667895	0.857098	1
ENSMUSG00000020821	Kif1c	kinesin family member 1C	3614.39	3551.45	1.01772	0.0253361	0.935543	1
ENSMUSG00000043602	Zfp3	zinc finger protein 3	115.262	80.8882	1.41976	0.505652	0.46857	1
ENSMUSG00000057135	Scimp	SLP adaptor and CSK interacting membrane protein	56.6024	30.7452	1.81452	0.859591	0.0913103	1
ENSMUSG00000040667	Nup88	nucleoporin 88	567.518	543.121	1.04484	0.0632787	0.781283	1
ENSMUSG00000018449	Rpain	RPA interacting protein	160.647	116.61	1.37442	0.458826	0.171297	1
ENSMUSG00000018446	C1qbp	complement component 1, q subcomponent binding protein	673.495	591.555	1.13828	0.186857	0.420423	1
ENSMUSG00000040620	Dhx33	DEAH (Asp-Glu-Ala-His) box polypeptide 33	264.466	222.391	1.18835	0.248957	0.454314	1
ENSMUSG00000018442	Derl2	Der1-like domain family, member 2	244.525	235.576	1.03783	0.0535663	0.759693	1
ENSMUSG00000040599	Mis12	MIS12 kinetochore complex component	181.419	144.594	1.25293	0.325306	0.33114	1
ENSMUSG00000092528	Nlrp1c-ps	NLR family, pyrin domain containing 1C, pseudogene	162.41	159.689	1.01693	0.0242198	0.966946	1
ENSMUSG00000085251	Gm12326	predicted gene 12326	10.6681	10.6434	1.00213	0.00306661	0.998055	1
ENSMUSG00000020811	Wscd1	WSC domain containing 1	225.895	150.066	1.50196	0.586845	0.0682574	1
ENSMUSG00000020808	Pimreg	PICALM interacting mitotic regulator	7.29998	3.12536	2.01194	1.00859	0.386524	1
ENSMUSG00000020803	Txndc17	thioredoxin domain containing 17	400.97	388.4	1.03228	0.0458337	0.893328	1
ENSMUSG00000020801	Med31	mediator complex subunit 31	64.2622	44.3774	1.43821	0.524272	0.286215	1
ENSMUSG00000040483	Xaf1	XIAP associated factor 1	177.096	121.356	1.45556	0.54157	0.255837	1
ENSMUSG00000045667	Smtnl2	smoothelin-like 2	331.42	238.618	1.38729	0.472269	0.0902599	1
ENSMUSG00000040471	Ggt6	gamma-glutamyltransferase 6	91.3999	43.8382	2.06074	1.04316	0.0175973	1
ENSMUSG00000040463	Mybbp1a	MYB binding protein (P160) 1a	1048.07	960.235	1.09137	0.126142	0.55259	1
ENSMUSG00000040447	Spns2	spinster homolog 2	623.456	416.557	1.4955	0.580628	0.0344271	1
ENSMUSG00000020798	Spns3	spinster homolog 3	40.4179	33.6211	1.19632	0.2586	0.816924	1
ENSMUSG00000081675	Gm12712	predicted gene 12712	3.71902	1.17498	2.16968	1.11749	0.436275	1
ENSMUSG00000020794	Ube2g1	ubiquitin-conjugating enzyme E2G 1	383.953	358.948	1.06947	0.0968921	0.628374	1
ENSMUSG00000020790	Ankfy1	ankyrin repeat and FYVE domain containing 1	1133.13	1117.75	1.01374	0.0196933	0.94144	1
ENSMUSG00000057778	Cyb5d2	cytochrome b5 domain containing 2	110.058	104.431	1.05337	0.0750182	0.929003	1
ENSMUSG00000089224	Gm22075	predicted gene, 22075	6.04595	0	7.04595	2.81679	0.0523799	1
ENSMUSG00000084329	Gm6733	predicted gene 6733	262.044	225.835	1.15963	0.213664	0.50688	1
ENSMUSG00000005947	Itgae	integrin alpha E, epithelial-associated	39.825	23.3468	1.67681	0.74572	0.149079	1
ENSMUSG00000050107	Haspin	histone H3 associated protein kinase	44.4358	30.5493	1.44015	0.526221	0.304885	1
ENSMUSG00000047260	Emc6	ER membrane protein complex subunit 6	442.615	394.897	1.12053	0.164183	0.46389	1
ENSMUSG00000040158	Tax1bp3	Tax1 (human T cell leukemia virus type I) binding protein 3	63.891	62.6273	1.01986	0.0283731	0.975615	1
ENSMUSG00000005951	Shpk	sedoheptulokinase	103.46	92.0058	1.12316	0.16756	0.667621	1
ENSMUSG00000043029	Trpv3	transient receptor potential cation channel, subfamily V, member 3	52.829	33.6216	1.55478	0.636711	0.320448	1
ENSMUSG00000020774	Aspa	aspartoacylase	1051.72	741.433	1.41793	0.503789	0.21728	1
ENSMUSG00000038807	Rap1gap2	RAP1 GTPase activating protein 2	941.021	927.058	1.01505	0.0215449	0.855192	1
ENSMUSG00000069814	Ccdc92b	coiled-coil domain containing 92B	8.54262	2.04578	3.13307	1.64757	0.227033	1
ENSMUSG00000020741	Cluh	clustered mitochondria (cluA/CLU1) homolog	3141.68	2862.66	1.09743	0.134134	0.524802	1
ENSMUSG00000038351	Sgsm2	small G protein signaling modulator 2	468.238	454.101	1.03106	0.0441322	0.940215	1
ENSMUSG00000038335	Tsr1	TSR1 20S rRNA accumulation	185.869	181.89	1.02176	0.0310535	0.980506	1
ENSMUSG00000001323	Srr	serine racemase	449.371	426.136	1.0544	0.0764186	0.71702	1
ENSMUSG00000038290	Smg6	Smg-6 homolog, nonsense mediated mRNA decay factor (C. elegans)	1207.69	1156.75	1.04399	0.0621096	0.842927	1
ENSMUSG00000082481	Rps12-ps19	ribosomal protein S12, pseudogene 19	3.61263	1.94138	1.56818	0.649093	0.735852	1
ENSMUSG00000078789	Dph1	diphthamide biosynthesis 1	57.0052	53.1572	1.07105	0.099029	0.866211	1
ENSMUSG00000018809	Smyd4	SET and MYND domain containing 4	153.231	137.88	1.11054	0.15126	0.597145	1
ENSMUSG00000020850	Prpf8	pre-mRNA processing factor 8	4193.82	3995.61	1.0496	0.0698335	0.745275	1
ENSMUSG00000038188	Scarf1	scavenger receptor class F, member 1	165.312	159.028	1.03926	0.055563	0.81845	1
ENSMUSG00000081485	Gm12338	predicted gene 12338	531.5	476.712	1.11469	0.15664	0.511934	1
ENSMUSG00000017774	Myo1c	myosin IC	3009.49	2923.56	1.02938	0.0417808	0.869401	1
ENSMUSG00000020849	Ywhae	tyrosine 3-monooxygenase/tryptophan 5-monooxygenase activation protein, epsilon polypeptide	4740.62	4419.04	1.07276	0.101321	0.632254	1
ENSMUSG00000020848	Doc2b	double C2, beta	21.5694	11.6365	1.78604	0.836764	0.336773	1
ENSMUSG00000017288	Vps53	VPS53 GARP complex subunit	525.366	490.093	1.07182	0.100068	0.694313	1
ENSMUSG00000017286	Glod4	glyoxalase domain containing 4	651.586	619.51	1.05169	0.0727132	0.717847	1
ENSMUSG00000069808	Fam57a	family with sequence similarity 57, member A	51.2151	37.9895	1.33921	0.421381	0.415212	1
ENSMUSG00000024205	Rpl36-ps2	ribosomal protein L36, pseudogene 2	372.413	348.219	1.06928	0.0966402	0.671305	1
ENSMUSG00000010392	Gosr1	golgi SNAP receptor complex member 1	554.181	493.386	1.12297	0.16732	0.497224	1
ENSMUSG00000020841	Cpd	carboxypeptidase D	2467.7	2292.29	1.07649	0.10633	0.553419	1
ENSMUSG00000020838	Slc6a4	solute carrier family 6 (neurotransmitter transporter, serotonin), member 4	33.5662	21.8623	1.51193	0.596392	0.3655	1
ENSMUSG00000037958	Nsrp1	nuclear speckle regulatory protein 1	734.651	694.074	1.05838	0.0818546	0.799327	1
ENSMUSG00000037907	Ankrd13b	ankyrin repeat domain 13b	122.648	101.973	1.20079	0.26398	0.531076	1
ENSMUSG00000011877	Git1	G protein-coupled receptor kinase-interactor 1	850.142	805.596	1.05523	0.0775542	0.752796	1
ENSMUSG00000044328	Trp53i13	transformation related protein 53 inducible protein 13	82.5292	75.7073	1.08893	0.122916	0.746948	1
ENSMUSG00000072673	Gm10392	predicted gene 10392	9.5205	9.09578	1.04207	0.0594514	1	1
ENSMUSG00000081451	Gm12734	predicted gene 12734	30.0917	25.6555	1.16643	0.222097	0.704179	1
ENSMUSG00000037857	Nufip2	nuclear fragile X mental retardation protein interacting protein 2	1598.94	1579.38	1.01237	0.0177403	1	1
ENSMUSG00000017453	Pipox	pipecolic acid oxidase	974.927	889.344	1.09612	0.132411	0.550344	1
ENSMUSG00000020834	Dhrs13	dehydrogenase/reductase (SDR family) member 13	52.3514	52.0115	1.00641	0.00922152	0.962734	1
ENSMUSG00000061981	Flot2	flotillin 2	575.168	571.395	1.00659	0.00948074	0.948423	1
ENSMUSG00000060727	Gm12571	predicted gene 12571	67.6848	47.8418	1.40627	0.491873	0.297564	1
ENSMUSG00000017405	Nek8	NIMA (never in mitosis gene a)-related expressed kinase 8	134.21	133.413	1.00594	0.00853915	0.914258	1
ENSMUSG00000019437	Tlcd1	TLC domain containing 1	251.759	244.777	1.02841	0.0404136	0.899582	1
ENSMUSG00000058546	Rpl23a	ribosomal protein L23A	15.6298	12.7126	1.21274	0.278273	0.819344	1
ENSMUSG00000002059	Rab34	RAB34, member RAS oncogene family	244.09	226.147	1.07899	0.109688	0.604772	1
ENSMUSG00000044122	Proca1	protein interacting with cyclin A1	36.828	31.7461	1.15519	0.208133	0.875771	1
ENSMUSG00000002064	Sdf2	stromal cell derived factor 2	238.723	235.804	1.01233	0.017678	0.840452	1
ENSMUSG00000010277	2610507B11Rik	RIKEN cDNA 2610507B11 gene	5389.6	5008.84	1.076	0.105681	0.604687	1
ENSMUSG00000017390	Aldoc	aldolase C, fructose-bisphosphate	163.313	153.336	1.06464	0.0903722	0.791398	1
ENSMUSG00000041958	Pigs	phosphatidylinositol glycan anchor biosynthesis, class S	259.826	250.227	1.03821	0.0540996	0.736842	1
ENSMUSG00000002058	Unc119	unc-119 lipid binding chaperone	65.4009	62.2992	1.049	0.0690149	0.736045	1
ENSMUSG00000085747	Slc13a2os	solute carrier family 13 (sodium-dependent dicarboxylate transporter), member 2, opposite strand	26.6488	9.7519	2.57153	1.36262	0.0951307	1
ENSMUSG00000001095	Slc13a2	solute carrier family 13 (sodium-dependent dicarboxylate transporter), member 2	184.733	101.241	1.81662	0.86126	0.134108	1
ENSMUSG00000020829	Slc46a1	solute carrier family 46, member 1	137.812	109.066	1.26117	0.334759	0.301541	1
ENSMUSG00000050132	Sarm1	sterile alpha and HEAT/Armadillo motif containing 1	18.1695	11.2635	1.56314	0.644444	0.465384	1
ENSMUSG00000017344	Vtn	vitronectin	3.12368	2.14118	1.31278	0.392629	0.892399	1
ENSMUSG00000051232	Tmem199	transmembrane protein 199	91.9116	88.7186	1.03559	0.0504511	0.867001	1
ENSMUSG00000001100	Poldip2	polymerase (DNA-directed), delta interacting protein 2	685.06	544.396	1.25791	0.33103	0.169521	1
ENSMUSG00000017615	Tnfaip1	tumor necrosis factor, alpha-induced protein 1 (endothelial)	604.173	549.575	1.09917	0.136408	0.631003	1
ENSMUSG00000037278	Tmem97	transmembrane protein 97	43.544	27.2683	1.57576	0.656044	0.211177	1
ENSMUSG00000082110	Gm11196	predicted gene 11196	20.5598	12.7966	1.56269	0.644027	0.449792	1
ENSMUSG00000049489	Fam58b	family with sequence similarity 58, member B	77.5244	64.972	1.19027	0.251288	0.497031	1
ENSMUSG00000001123	Lgals9	lectin, galactose binding, soluble 9	231.179	206.367	1.11965	0.163049	0.656802	1
ENSMUSG00000082304	Gm11198	predicted gene 11198	15.0458	5.54684	2.45093	1.29333	0.126049	1
ENSMUSG00000082529	Gm11199	predicted gene 11199	8.12841	3.60868	1.9807	0.986008	0.468718	1
ENSMUSG00000091523	AU040972	expressed sequence AU040972	21.6758	18.8769	1.14081	0.190059	0.863464	1
ENSMUSG00000017639	Rab11fip4	RAB11 family interacting protein 4 (class II)	1301.94	1185.62	1.09803	0.13492	0.516802	1
ENSMUSG00000082252	Gm11204	predicted gene 11204	3.99517	2.13218	1.59479	0.673366	0.658244	1
ENSMUSG00000035575	Utp6	UTP6 small subunit processome component	635.49	586.625	1.08316	0.115241	0.60364	1
ENSMUSG00000017561	Crlf3	cytokine receptor-like factor 3	281.787	250.749	1.12329	0.167732	0.558594	1
ENSMUSG00000046909	Tefm	transcription elongation factor, mitochondrial	78.4162	76.5431	1.02416	0.0344346	0.861343	1
ENSMUSG00000020709	Adap2	ArfGAP with dual PH domains 2	631.302	569.295	1.10873	0.148907	0.557313	1
ENSMUSG00000086507	Adap2os	ArfGAP with dual PH domains 2, opposite strand	22.6423	16.0233	1.38882	0.473858	0.607431	1
ENSMUSG00000017686	Rhot1	ras homolog family member T1	575.359	570.103	1.0092	0.0132152	0.965164	1
ENSMUSG00000057181	5730455P16Rik	RIKEN cDNA 5730455P16 gene	277.674	250.639	1.10744	0.147227	0.648771	1
ENSMUSG00000048895	Cdk5r1	cyclin-dependent kinase 5, regulatory subunit 1 (p35)	32.6947	28.5153	1.1416	0.191062	0.725658	1
ENSMUSG00000085078	C030013C21Rik	RIKEN cDNA C030013C21 gene	7.57612	5.94654	1.23459	0.30403	0.810307	1
ENSMUSG00000035413	Tmem98	transmembrane protein 98	41.8213	27.4411	1.50561	0.590351	0.330895	1
ENSMUSG00000035373	Ccl7	chemokine (C-C motif) ligand 7	30.5376	26.1315	1.16239	0.2171	0.723892	1
ENSMUSG00000035352	Ccl12	chemokine (C-C motif) ligand 12	42.0455	30.1966	1.37982	0.464475	0.352712	1
ENSMUSG00000020701	Tmem132e	transmembrane protein 132E	4.10157	2.96422	1.2869	0.363904	0.659422	1
ENSMUSG00000018844	Fndc8	fibronectin type III domain containing 8	5.93955	0.638132	4.23626	2.08279	0.183634	1
ENSMUSG00000020692	Nle1	notchless homolog 1 (Drosophila)	41.8327	37.0687	1.12514	0.170109	0.698013	1
ENSMUSG00000086058	Unc45bos	unc-45 myosin chaperone B, opposite strand	2.18885	1.96837	1.07428	0.103366	0.992909	1
ENSMUSG00000069793	Slfn9	schlafen 9	66.6752	63.8026	1.04433	0.0625757	0.923921	1
ENSMUSG00000035208	Slfn8	schlafen 8	202.459	168.41	1.20098	0.264215	0.660665	1
ENSMUSG00000082419	Gm11425	predicted gene 11425	12.0805	7.70924	1.50191	0.586802	0.777365	1
ENSMUSG00000018986	Slfn3	schlafen 3	79.8603	38.8967	2.02674	1.01916	0.0313366	1
ENSMUSG00000093483	AA465934	expressed sequence AA465934	9.97777	3.20865	2.60838	1.38315	0.283138	1
ENSMUSG00000018733	Pex12	peroxisomal biogenesis factor 12	89.6569	64.6997	1.37987	0.464531	0.257794	1
ENSMUSG00000035152	Ap2b1	adaptor-related protein complex 2, beta 1 subunit	1220.2	1183.74	1.03077	0.0437246	0.860046	1
ENSMUSG00000020684	Rasl10b	RAS-like, family 10, member B	20.6662	18.1317	1.13248	0.179481	0.966513	1
ENSMUSG00000035085	1700020L24Rik	RIKEN cDNA 1700020L24 gene	7.57612	5.88079	1.24639	0.31775	0.704346	1
ENSMUSG00000020682	Mmp28	matrix metallopeptidase 28 (epilysin)	71.5418	63.4637	1.12531	0.170327	0.71907	1
ENSMUSG00000018925	Heatr9	HEAT repeat containing 9	10.487	9.44727	1.09952	0.136877	1	1
ENSMUSG00000000982	Ccl3	chemokine (C-C motif) ligand 3	640.345	600.047	1.06705	0.093623	0.875355	1
ENSMUSG00000018930	Ccl4	chemokine (C-C motif) ligand 4	410.846	355.786	1.15432	0.207044	0.540824	1
ENSMUSG00000069792	Wfdc17	WAP four-disulfide core domain 17	47.7723	46.0726	1.03611	0.0511739	1	1
ENSMUSG00000084666	Gm23211	predicted gene, 23211	7.2886	3.26263	1.94448	0.959384	0.66434	1
ENSMUSG00000018648	Dusp14	dual specificity phosphatase 14	93.4393	47.0878	1.9639	0.973718	0.0252522	1
ENSMUSG00000018651	Tada2a	transcriptional adaptor 2A	136.345	110.056	1.23672	0.306514	0.487901	1
ENSMUSG00000020532	Acaca	acetyl-Coenzyme A carboxylase alpha	203.733	161.203	1.2622	0.335941	0.309238	1
ENSMUSG00000087211	Lhx1os	LIM homeobox 1, opposite strand	34.2249	33.7997	1.01222	0.0175215	0.8488	1
ENSMUSG00000018405	Mrm1	mitochondrial rRNA methyltransferase 1	79.4258	49.8942	1.58026	0.660158	0.118251	1
ENSMUSG00000082917	Gm11440	predicted gene 11440	4.89832	1.48505	2.37352	1.24703	0.392689	1
ENSMUSG00000018481	Appbp2	amyloid beta precursor protein (cytoplasmic tail) binding protein 2	610.72	594.402	1.02741	0.039006	0.830035	1
ENSMUSG00000059439	Bcas3	breast carcinoma amplified sequence 3	443.676	432.928	1.02477	0.0352998	0.932499	1
ENSMUSG00000034329	Brip1	BRCA1 interacting protein C-terminal helicase 1	61.9036	33.0799	1.84577	0.884219	0.0981194	1
ENSMUSG00000085208	Brip1os	BRCA1 interacting protein C-terminal helicase 1, opposite strand	372.603	355.523	1.04791	0.0675107	0.769454	1
ENSMUSG00000018068	Ints2	integrator complex subunit 2	412.322	401.922	1.02581	0.0367647	0.847913	1
ENSMUSG00000020516	Rps6kb1	ribosomal protein S6 kinase, polypeptide 1	479.59	467.9	1.02493	0.0355246	0.945368	1
ENSMUSG00000083992	Gm11478	predicted gene 11478	3271.87	3048.63	1.0732	0.10192	0.573557	1
ENSMUSG00000047126	Cltc	clathrin, heavy polypeptide (Hc)	6079.08	5426.85	1.12016	0.163708	0.424078	1
ENSMUSG00000018425	Dhx40	DEAH (Asp-Glu-Ala-His) box polypeptide 40	770.155	769.411	1.00097	0.00139355	1	1
ENSMUSG00000061666	Gdpd1	glycerophosphodiester phosphodiesterase domain containing 1	31.271	28.5567	1.09183	0.126752	0.80115	1
ENSMUSG00000020495	Smg8	smg-8 homolog, nonsense mediated mRNA decay factor (C. elegans)	177.922	125.253	1.41717	0.503013	0.137046	1
ENSMUSG00000010342	Tex14	testis expressed gene 14	22.3344	15.1525	1.44463	0.530705	0.503855	1
ENSMUSG00000020486	Sept4	septin 4	328.69	293.169	1.12075	0.164468	0.482963	1
ENSMUSG00000018401	Mtmr4	myotubularin related protein 4	913.314	896.12	1.01917	0.0273886	0.834677	1
ENSMUSG00000085972	1110028F11Rik	RIKEN cDNA 1110028F11 gene	3.88877	3.86478	1.00493	0.00709744	1	1
ENSMUSG00000084796	Mir142hg	Mir142 host gene (non-protein coding)	25.6709	17.3402	1.45423	0.540259	0.668784	1
ENSMUSG00000034121	Mks1	Meckel syndrome, type 1	84.2924	79.3379	1.06167	0.0863371	0.820325	1
ENSMUSG00000020483	Dynll2	dynein light chain LC8-type 2	1247.21	1179.24	1.05759	0.0807738	0.743264	1
ENSMUSG00000018379	Srsf1	serine/arginine-rich splicing factor 1	1148.78	1033	1.11197	0.153124	0.592892	1
ENSMUSG00000023723	Mrps23	mitochondrial ribosomal protein S23	293.166	244.653	1.19749	0.260011	0.369572	1
ENSMUSG00000087574	C030037D09Rik	RIKEN cDNA C030037D09 gene	92.9845	85.823	1.08248	0.114345	0.692765	1
ENSMUSG00000000278	Scpep1	serine carboxypeptidase 1	931.248	765.41	1.21638	0.282597	0.244608	1
ENSMUSG00000033983	Coil	coilin	72.9542	60.8121	1.19644	0.258745	0.569756	1
ENSMUSG00000000276	Dgke	diacylglycerol kinase, epsilon	145.992	124.433	1.17188	0.228825	0.593082	1
ENSMUSG00000048616	Nog	noggin	28.8807	18.5279	1.53015	0.613674	0.363375	1
ENSMUSG00000003948	Mmd	monocyte to macrophage differentiation-associated	233.667	192.116	1.21516	0.281142	0.331712	1
ENSMUSG00000003949	Hlf	hepatic leukemia factor	746.55	492.879	1.51363	0.598012	0.158706	1
ENSMUSG00000083268	Gm11511	predicted gene 11511	5.52534	2.54076	1.84292	0.881994	0.415099	1
ENSMUSG00000020541	Tom1l1	target of myb1-like 1 (chicken)	330.526	287.998	1.14715	0.19806	0.4846	1
ENSMUSG00000037601	Nme1	NME/NM23 nucleoside diphosphate kinase 1	158.596	142.117	1.11514	0.157223	0.64596	1
ENSMUSG00000081604	Gm11518	predicted gene 11518	6.46017	3.09249	1.82289	0.86623	0.477808	1
ENSMUSG00000020864	Ankrd40	ankyrin repeat domain 40	1039.89	991.145	1.04913	0.0691929	0.763067	1
ENSMUSG00000020865	Abcc3	ATP-binding cassette, sub-family C (CFTR/MRP), member 3	405.874	85.0839	4.72648	2.24077	0.0205581	1
ENSMUSG00000020867	Spata20	spermatogenesis associated 20	9.27603	1.9265	3.51137	1.81203	0.127266	1
ENSMUSG00000039096	Rsad1	radical S-adenosyl methionine domain containing 1	85.6618	83.6822	1.02338	0.0333369	0.934689	1
ENSMUSG00000020869	Lrrc59	leucine rich repeat containing 59	510.372	494.383	1.03227	0.0458271	0.827664	1
ENSMUSG00000039055	Eme1	essential meiotic structure-specific endonuclease 1	17.0852	13.6819	1.23181	0.300778	0.801547	1
ENSMUSG00000024414	Mrpl27	mitochondrial ribosomal protein L27	116.498	90.2934	1.28704	0.364056	0.284731	1
ENSMUSG00000020868	Xylt2	xylosyltransferase II	266.157	253.264	1.05071	0.0713647	0.80059	1
ENSMUSG00000047181	Samd14	sterile alpha motif domain containing 14	146.035	112.644	1.29383	0.371643	0.338544	1
ENSMUSG00000038967	Pdk2	pyruvate dehydrogenase kinase, isoenzyme 2	1947.65	1487.41	1.30921	0.388696	0.0855529	1
ENSMUSG00000038893	Fam117a	family with sequence similarity 117, member A	104.703	73.589	1.41714	0.502978	0.219029	1
ENSMUSG00000000120	Ngfr	nerve growth factor receptor (TNFR superfamily, member 16)	17.5425	11.7049	1.45947	0.545446	0.549348	1
ENSMUSG00000038845	Phb	prohibitin	247.594	196.421	1.25921	0.332515	0.24546	1
ENSMUSG00000075596	B130006D01Rik	RIKEN cDNA B130006D01 gene	14.2808	9.84374	1.40918	0.494853	0.63617	1
ENSMUSG00000050860	Phospho1	phosphatase, orphan 1	11.0823	5.8417	1.76599	0.820474	0.449151	1
ENSMUSG00000038811	Gngt2	guanine nucleotide binding protein (G protein), gamma transducing activity polypeptide 2	161.636	153.269	1.05423	0.0761956	0.807533	1
ENSMUSG00000013418	B4galnt2	beta-1,4-N-acetyl-galactosaminyl transferase 2	5.31254	2.37384	1.87102	0.903829	0.590432	1
ENSMUSG00000014349	Ube2z	ubiquitin-conjugating enzyme E2Z	615.983	554.947	1.10979	0.150282	0.498677	1
ENSMUSG00000006057	Atp5g1	ATP synthase, H+ transporting, mitochondrial F0 complex, subunit C1 (subunit 9)	509.894	415.608	1.22632	0.294333	0.351073	1
ENSMUSG00000083337	Gm11539	predicted gene 11539	83.8238	70.4758	1.18675	0.247015	0.566189	1
ENSMUSG00000078706	Gm53	predicted gene 53	527.489	395.109	1.3342	0.415974	0.135292	1
ENSMUSG00000020875	Hoxb9	homeobox B9	285.264	269.81	1.05707	0.0800641	0.681086	1
ENSMUSG00000056648	Hoxb8	homeobox B8	144.505	123.287	1.17072	0.227399	0.546016	1
ENSMUSG00000000690	Hoxb6	homeobox B6	585.538	451.7	1.29564	0.373669	0.137485	1
ENSMUSG00000057058	Skap1	src family associated phosphoprotein 1	33.109	30.8551	1.07075	0.0986252	0.959272	1
ENSMUSG00000018666	Cbx1	chromobox 1	754.408	708.862	1.06416	0.0897173	0.720761	1
ENSMUSG00000018672	Copz2	coatomer protein complex, subunit zeta 2	252.608	186.238	1.35447	0.437724	0.152089	1
ENSMUSG00000018669	Cdk5rap3	CDK5 regulatory subunit associated protein 3	284.189	252.14	1.12661	0.171983	0.521475	1
ENSMUSG00000085307	Gm11525	predicted gene 11525	9.16963	1.06159	4.9329	2.30244	0.0809349	1
ENSMUSG00000047040	Prr15l	proline rich 15-like	761.95	746.609	1.02052	0.0293044	0.879226	1
ENSMUSG00000018659	Pnpo	pyridoxine 5'-phosphate oxidase	242.707	241.818	1.00366	0.00527428	0.917926	1
ENSMUSG00000020877	Scrn2	secernin 2	465.945	416.487	1.11847	0.161523	0.750646	1
ENSMUSG00000001445	Mrpl10	mitochondrial ribosomal protein L10	303.155	251.978	1.2023	0.265795	0.354117	1
ENSMUSG00000038534	Osbpl7	oxysterol binding protein-like 7	180.355	138.393	1.30103	0.379655	0.388622	1
ENSMUSG00000038517	Tbkbp1	TBK1 binding protein 1	206.083	190.944	1.07887	0.109523	0.871102	1
ENSMUSG00000001441	Npepps	aminopeptidase puromycin sensitive	638.335	540.948	1.1797	0.238416	0.353544	1
ENSMUSG00000018882	Mrpl45	mitochondrial ribosomal protein L45	295.93	252.861	1.16965	0.226082	0.426978	1
ENSMUSG00000070337	Gpr179	G protein-coupled receptor 179	16.6394	16.3185	1.01853	0.0264864	0.989476	1
ENSMUSG00000047988	4933428G20Rik	RIKEN cDNA 4933428G20 gene	4.51578	3.90076	1.12549	0.170559	0.982988	1
ENSMUSG00000038453	Srcin1	SRC kinase signaling inhibitor 1	658.7	588.313	1.11944	0.162776	0.737541	1
ENSMUSG00000087042	Gm11611	predicted gene 11611	87.33	75.9608	1.14773	0.19878	0.79222	1
ENSMUSG00000085860	2410003L11Rik	RIKEN cDNA 2410003L11 gene	15.8109	11.4723	1.34786	0.430674	0.589069	1
ENSMUSG00000085586	Gm11613	predicted gene 11613	14.4505	11.3535	1.2507	0.322739	0.76373	1
ENSMUSG00000018537	Pcgf2	polycomb group ring finger 2	183.398	161.17	1.13706	0.185313	0.54929	1
ENSMUSG00000018547	Pip4k2b	phosphatidylinositol-5-phosphate 4-kinase, type II, beta	324.494	289.628	1.11997	0.163456	0.531547	1
ENSMUSG00000018541	Cwc25	CWC25 spliceosome-associated protein	361.639	356.185	1.01527	0.0218628	0.907318	1
ENSMUSG00000084168	Atp5l2-ps	ATP synthase, H+ transporting, mitochondrial FO complex, subunit G2, pseudogene	160.626	131.654	1.2184	0.284993	0.316653	1
ENSMUSG00000018543	1700001P01Rik	RIKEN cDNA 1700001P01 gene	2.98561	2.57952	1.11345	0.155037	1	1
ENSMUSG00000071415	Rpl23	ribosomal protein L23	443.377	366.34	1.20972	0.274671	0.325613	1
ENSMUSG00000017404	Rpl19	ribosomal protein L19	538.286	491.679	1.0946	0.130401	0.571035	1
ENSMUSG00000085897	Gm11604	predicted gene 11604	9.33938	1.73571	3.77942	1.91816	0.170755	1
ENSMUSG00000093176	Mir5119	microRNA 5119	4.97305	2.23657	1.84549	0.884	0.443732	1
ENSMUSG00000038216	Pnmt	phenylethanolamine-N-methyltransferase	2.60307	1.96837	1.21382	0.279555	0.992565	1
ENSMUSG00000038208	Pgap3	post-GPI attachment to proteins 3	88.2648	80.9213	1.08964	0.123853	0.778913	1
ENSMUSG00000062312	Erbb2	erb-b2 receptor tyrosine kinase 2	1041.68	756.401	1.37666	0.461173	0.0555833	1
ENSMUSG00000089223	Gm25048	predicted gene, 25048	5.55701	3.65321	1.40914	0.49481	0.715824	1
ENSMUSG00000002580	Mien1	migration and invasion enhancer 1	149.521	123.446	1.20953	0.274451	0.377326	1
ENSMUSG00000019312	Grb7	growth factor receptor bound protein 7	746.073	652.585	1.14304	0.192874	0.567009	1
ENSMUSG00000038150	Ormdl3	ORM1-like 3 (S. cerevisiae)	161.199	125.557	1.28163	0.35798	0.253249	1
ENSMUSG00000017221	Psmd3	proteasome (prosome, macropain) 26S subunit, non-ATPase, 3	1158.41	1027.82	1.12693	0.172402	0.453777	1
ENSMUSG00000085955	Gm12356	predicted gene 12356	12.3997	6.86498	1.70372	0.768688	0.441447	1
ENSMUSG00000038067	Csf3	colony stimulating factor 3 (granulocyte)	3.12368	1.29426	1.79739	0.845907	0.723542	1
ENSMUSG00000017210	Med24	mediator complex subunit 24	351.267	346.365	1.01411	0.0202177	0.942455	1
ENSMUSG00000058756	Thra	thyroid hormone receptor alpha	1210.98	1116.06	1.08497	0.117661	0.570483	1
ENSMUSG00000020889	Nr1d1	nuclear receptor subfamily 1, group D, member 1	2115.68	1681.04	1.2584	0.331594	0.152246	1
ENSMUSG00000052915	Msl1	male-specific lethal 1 homolog (Drosophila)	761.434	689.213	1.10464	0.143571	0.524921	1
ENSMUSG00000075576	Gm12359	predicted gene 12359	16.3949	12.8385	1.25699	0.329975	0.742911	1
ENSMUSG00000038013	Wipf2	WAS/WASL interacting protein family, member 2	538.436	537.795	1.00119	0.00171465	0.960502	1
ENSMUSG00000064491	Gm22061	predicted gene, 22061	5.97123	1.73571	2.54823	1.3495	0.39509	1
ENSMUSG00000017493	Igfbp4	insulin-like growth factor binding protein 4	4732.11	4645.42	1.01866	0.0266684	0.927505	1
ENSMUSG00000037935	Smarce1	SWI/SNF related, matrix associated, actin dependent regulator of chromatin, subfamily e, member 1	334.634	327.653	1.02124	0.0303235	0.966851	1
ENSMUSG00000035849	Krt222	keratin 222	28.3487	14.3771	1.9086	0.932515	0.171114	1
ENSMUSG00000055937	Krt28	keratin 28	3.82542	2.12318	1.54503	0.627638	0.609418	1
ENSMUSG00000054146	Krt15	keratin 15	9.13796	7.24657	1.22936	0.297902	0.685975	1
ENSMUSG00000045545	Krt14	keratin 14	3.47455	2.22758	1.38635	0.471292	0.729433	1
ENSMUSG00000082456	Gm11598	predicted gene 11598	17.298	7.87615	2.06148	1.04368	0.242779	1
ENSMUSG00000035530	Eif1	eukaryotic translation initiation factor 1	1122.16	1031.05	1.08828	0.122045	0.556475	1
ENSMUSG00000092509	Gm20394	predicted gene 20394	4.16491	3.90976	1.05197	0.0730922	1	1
ENSMUSG00000091478	Gm10039	predicted pseudogene 10039	698.317	606.798	1.15057	0.202354	0.487739	1
ENSMUSG00000006931	P3h4	prolyl 3-hydroxylase family member 4 (non-enzymatic)	56.8469	48.8849	1.15961	0.213637	0.640578	1
ENSMUSG00000017176	Nt5c3b	5'-nucleotidase, cytosolic IIIB	167.553	120.544	1.38676	0.471719	0.171281	1
ENSMUSG00000048732	Klhl11	kelch-like 11	257.882	245.032	1.05223	0.0734469	0.759526	1
ENSMUSG00000020917	Acly	ATP citrate lyase	1679.81	1421.53	1.18156	0.240694	0.294796	1
ENSMUSG00000006782	Cnp	2',3'-cyclic nucleotide 3' phosphodiesterase	171.292	143.344	1.19362	0.25534	0.447399	1
ENSMUSG00000017837	Nkiras2	NFKB inhibitor interacting Ras-like protein 2	142.477	92.7569	1.53031	0.613823	0.0879076	1
ENSMUSG00000017830	Dhx58	DEXH (Asp-Glu-X-His) box polypeptide 58	96.7352	88.7715	1.08871	0.122621	0.830193	1
ENSMUSG00000020918	Kat2a	K(lysine) acetyltransferase 2A	306.023	252.454	1.21136	0.276624	0.367607	1
ENSMUSG00000019173	Rab5c	RAB5C, member RAS oncogene family	1573.58	1375.39	1.14399	0.19408	0.404734	1
ENSMUSG00000001751	Naglu	alpha-N-acetylglucosaminidase (Sanfilippo disease IIIB)	231.817	220.983	1.04881	0.068747	0.674607	1
ENSMUSG00000017801	Mlx	MAX-like protein X	311.358	277.776	1.12046	0.164097	0.487519	1
ENSMUSG00000019303	Psmc3ip	proteasome (prosome, macropain) 26S subunit, ATPase 3, interacting protein	42.7878	32.8026	1.2954	0.373395	0.622444	1
ENSMUSG00000035198	Tubg1	tubulin, gamma 1	214.252	161.418	1.3253	0.406317	0.208504	1
ENSMUSG00000045007	Tubg2	tubulin, gamma 2	13.1648	10.2109	1.26348	0.337408	0.779632	1
ENSMUSG00000035172	Plekhh3	pleckstrin homology domain containing, family H (with MyTH4 domain) member 3	134.455	113.036	1.18783	0.248327	0.537662	1
ENSMUSG00000001240	Ramp2	receptor (calcitonin) activity modifying protein 2	361.426	310.509	1.16345	0.218413	0.450504	1
ENSMUSG00000017188	Coa3	cytochrome C oxidase assembly factor 3	230.678	167.528	1.37472	0.459137	0.132633	1
ENSMUSG00000035086	Becn1	beclin 1, autophagy related	816.956	809.381	1.00935	0.0134239	0.977836	1
ENSMUSG00000078651	Aoc2	amine oxidase, copper containing 2 (retina-specific)	28.996	25.4854	1.13255	0.179572	0.982919	1
ENSMUSG00000083991	Gm11618	predicted gene 11618	6.24737	0.97519	3.6692	1.87547	0.361637	1
ENSMUSG00000075528	Aarsd1	alanyl-tRNA synthetase domain containing 1	281.948	258.309	1.09116	0.125867	0.590241	1
ENSMUSG00000063316	Rpl27	ribosomal protein L27	27.5203	26.8807	1.02294	0.0327191	0.828163	1
ENSMUSG00000034993	Vat1	vesicle amine transport 1	450.202	383.101	1.1747	0.232287	0.380669	1
ENSMUSG00000001313	Rnd2	Rho family GTPase 2	59.545	46.3549	1.27854	0.354493	0.517067	1
ENSMUSG00000017119	Nbr1	neighbor of Brca1 gene 1	2694.21	2506.43	1.07489	0.104189	0.609479	1
ENSMUSG00000034947	Tmem106a	transmembrane protein 106A	837.717	568.466	1.47281	0.558574	0.0725684	1
ENSMUSG00000010362	Rdm1	RAD52 motif 1	98.6885	64.9063	1.51258	0.597011	0.154075	1
ENSMUSG00000065767	Gm23849	predicted gene, 23849	4.89832	1.07958	2.8363	1.50401	0.325889	1
ENSMUSG00000065251	Gm23971	predicted gene, 23971	15.2789	11.9078	1.26117	0.334758	0.75057	1
ENSMUSG00000065944	Rnu2-10	U2 small nuclear RNA 10	14.0363	8.75239	1.54181	0.624621	0.492286	1
ENSMUSG00000017724	Etv4	ets variant 4	16.044	14.1089	1.12808	0.173868	0.913158	1
ENSMUSG00000001493	Meox1	mesenchyme homeobox 1	54.8164	42.2718	1.2899	0.367262	0.451369	1
ENSMUSG00000003518	Dusp3	dual specificity phosphatase 3 (vaccinia virus phosphatase VH1-related)	915.109	907.343	1.00855	0.0122818	1	1
ENSMUSG00000010841	1700006E09Rik	RIKEN cDNA 1700006E09 gene	14.111	8.91076	1.52471	0.608533	0.436668	1
ENSMUSG00000017309	Cd300lg	CD300 molecule like family member G	541.671	422.882	1.28024	0.356415	0.147295	1
ENSMUSG00000048217	Nags	N-acetylglutamate synthase	4.54745	0.742526	3.18357	1.67065	0.322609	1
ENSMUSG00000020922	Lsm12	LSM12 homolog	231.552	229.592	1.0085	0.0122107	0.873184	1
ENSMUSG00000034793	G6pc3	glucose 6 phosphatase, catalytic, 3	215.175	197.724	1.08782	0.121437	0.7043	1
ENSMUSG00000008855	Hdac5	histone deacetylase 5	1243.75	1213.25	1.02512	0.0357872	0.945943	1
ENSMUSG00000034768	Asb16	ankyrin repeat and SOCS box-containing 16	3.50623	2.33197	1.35242	0.435544	0.798852	1
ENSMUSG00000018677	Slc25a39	solute carrier family 25, member 39	2348.85	2115.42	1.1103	0.150945	0.46596	1
ENSMUSG00000034708	Grn	granulin	1622.18	1323.67	1.22535	0.293193	0.216556	1
ENSMUSG00000034685	Fam171a2	family with sequence similarity 171, member A2	70.7654	66.9934	1.05548	0.0778943	0.792839	1
ENSMUSG00000081677	Mdk-ps1	midkine pseudogene 1	9.13796	4.96546	1.69944	0.765061	0.477296	1
ENSMUSG00000020925	Ccdc43	coiled-coil domain containing 43	234.176	195.889	1.19446	0.256359	0.337958	1
ENSMUSG00000051378	Kif18b	kinesin family member 18B	13.9299	9.07734	1.48153	0.567089	0.596799	1
ENSMUSG00000020935	Dcakd	dephospho-CoA kinase domain containing	163.802	162.92	1.00538	0.00774239	0.957765	1
ENSMUSG00000043372	Hexim2	hexamethylene bis-acetamide inducible 2	27.2441	25.5627	1.0633	0.0885483	0.813213	1
ENSMUSG00000092371	Gm20511	predicted gene 20511	10.0094	5.34983	1.73382	0.793952	0.459609	1
ENSMUSG00000078635	1700028N14Rik	RIKEN cDNA 1700028N14 gene	47.4531	42.8264	1.10557	0.144788	0.884068	1
ENSMUSG00000034255	Arhgap27	Rho GTPase activating protein 27	431.786	377.844	1.14238	0.192049	0.540842	1
ENSMUSG00000085887	Arhgap27os3	Rho GTPase activating protein 27, opposite strand 3	57.3764	44.8731	1.27256	0.347738	0.748607	1
ENSMUSG00000085360	Arhgap27os2	Rho GTPase activating protein 27, opposite strand 2	5.31254	5.19813	1.01846	0.0263878	1	1
ENSMUSG00000085154	C130046K22Rik	RIKEN cDNA C130046K22 gene	27.2214	18.4272	1.45267	0.538709	0.644978	1
ENSMUSG00000086794	Gm11642	predicted gene 11642	6.35377	5.03387	1.21875	0.285399	0.881268	1
ENSMUSG00000000125	Wnt3	wingless-type MMTV integration site family, member 3	5.45061	3.00609	1.6102	0.687242	0.644924	1
ENSMUSG00000092540	Gm8738	predicted gene 8738	17.9251	7.08554	2.34061	1.22688	0.194051	1
ENSMUSG00000085134	Gm11659	predicted gene 11659	14.5569	14.0913	1.03085	0.0438334	0.97881	1
ENSMUSG00000020687	Cdc27	cell division cycle 27	511.459	491.746	1.04001	0.0565908	0.788717	1
ENSMUSG00000082706	Gm11663	predicted gene 11663	32.9709	27.2097	1.20423	0.268108	0.616383	1
ENSMUSG00000020691	Mettl2	methyltransferase like 2	73.4546	70.3487	1.04353	0.0614726	0.786927	1
ENSMUSG00000081965	Gm11620	predicted gene 11620	20.6028	10.9089	1.81401	0.859182	0.327069	1
ENSMUSG00000020694	Tlk2	tousled-like kinase 2 (Arabidopsis)	771.285	675.485	1.14162	0.191076	0.471752	1
ENSMUSG00000078627	March10	membrane-associated ring finger (C3HC4) 10	6.2157	3.63522	1.55671	0.6385	0.651082	1
ENSMUSG00000053580	Tanc2	tetratricopeptide repeat, ankyrin repeat and coiled-coil containing 2	2329.55	2289.71	1.01739	0.0248747	0.896228	1
ENSMUSG00000085255	Taco1os	translational activator of mitochondrially encoded cytochrome c oxidase I, opposite strand	8.3412	5.00688	1.55508	0.636991	0.523413	1
ENSMUSG00000001983	Taco1	translational activator of mitochondrially encoded cytochrome c oxidase I	128.909	77.8371	1.64782	0.720559	0.047773	1
ENSMUSG00000085229	Gm11672	predicted gene 11672	8.86182	8.72585	1.01398	0.0200296	1	1
ENSMUSG00000069631	Strada	STE20-related kinase adaptor alpha	170.294	141.085	1.20557	0.269715	0.47999	1
ENSMUSG00000078622	Ccdc47	coiled-coil domain containing 47	1334.88	1183.52	1.12778	0.173492	0.417048	1
ENSMUSG00000020706	Ftsj3	FtsJ RNA methyltransferase homolog 3 (E. coli)	493.416	465.415	1.06003	0.0841117	0.733996	1
ENSMUSG00000020708	Psmc5	protease (prosome, macropain) 26S subunit, ATPase 5	503.88	483.171	1.04277	0.0604247	0.815784	1
ENSMUSG00000065162	Gm23645	predicted gene, 23645	5.17447	2.26945	1.88854	0.917268	0.597548	1
ENSMUSG00000020715	Ern1	endoplasmic reticulum (ER) to nucleus signalling 1	618.701	615.659	1.00493	0.00709922	0.966577	1
ENSMUSG00000065126	Snord104	small nucleolar RNA, C/D box 104	10.5934	10.5925	1.00008	0.000114106	1	1
ENSMUSG00000080540	Gm22711	predicted gene, 22711	4.51578	3.91875	1.12138	0.165272	0.982806	1
ENSMUSG00000020717	Pecam1	platelet/endothelial cell adhesion molecule 1	2291.18	2159.05	1.06117	0.0856574	0.818514	1
ENSMUSG00000088400	Gm25889	predicted gene, 25889	5.69508	5.15903	1.08703	0.120398	1	1
ENSMUSG00000040481	Bptf	bromodomain PHD finger transcription factor	3691.39	3617.06	1.02054	0.0293368	0.945739	1
ENSMUSG00000018433	Nol11	nucleolar protein 11	310.254	268.653	1.15427	0.206985	0.430622	1
ENSMUSG00000040430	Pitpnc1	phosphatidylinositol transfer protein, cytoplasmic 1	914.153	854.886	1.06925	0.0965958	0.724871	1
ENSMUSG00000086298	Gm11716	predicted gene 11716	7.99033	5.25754	1.43672	0.522779	0.656201	1
ENSMUSG00000087683	Gm11712	predicted gene 11712	14.4822	11.9466	1.19585	0.258034	0.871433	1
ENSMUSG00000086442	Gm11722	predicted gene 11722	6.12067	1.50304	2.84481	1.50833	0.307879	1
ENSMUSG00000020721	Helz	helicase with zinc finger domain	1287.19	1251.6	1.02841	0.040415	0.921207	1
ENSMUSG00000083723	Rpl23a-ps14	ribosomal protein L23A, pseudogene 14	3.36815	2.6245	1.20518	0.269243	0.959336	1
ENSMUSG00000000142	Axin2	axin 2	106.797	79.6468	1.33665	0.418622	0.343906	1
ENSMUSG00000020599	Rgs9	regulator of G-protein signaling 9	13.8982	12.6113	1.09455	0.130337	0.868608	1
ENSMUSG00000020610	Amz2	archaelysin family metallopeptidase 2	406.549	359.605	1.13018	0.176557	0.546359	1
ENSMUSG00000041895	Wipi1	WD repeat domain, phosphoinositide interacting 1	383.527	359.825	1.06569	0.091786	0.7431	1
ENSMUSG00000020612	Prkar1a	protein kinase, cAMP dependent regulatory, type I, alpha	2362.19	2358.2	1.00169	0.00243779	0.969131	1
ENSMUSG00000018800	Abca5	ATP-binding cassette, sub-family A (ABC1), member 5	289.492	265.24	1.09109	0.125776	0.635612	1
ENSMUSG00000020623	Map2k6	mitogen-activated protein kinase kinase 6	168.712	128.688	1.30862	0.388045	0.22277	1
ENSMUSG00000051497	Kcnj16	potassium inwardly-rectifying channel, subfamily J, member 16	7405.76	6925.54	1.06933	0.0967071	0.654027	1
ENSMUSG00000047904	Sstr2	somatostatin receptor 2	2.6778	1.94138	1.25036	0.322346	0.822987	1
ENSMUSG00000018661	Cog1	component of oligomeric golgi complex 1	429.939	421.578	1.01979	0.0282673	0.845899	1
ENSMUSG00000083339	Gm11693	predicted gene 11693	4.79193	3.21765	1.37326	0.457604	0.858841	1
ENSMUSG00000041592	Sdk2	sidekick cell adhesion molecule 2	24.2471	22.8856	1.057	0.0799794	0.986463	1
ENSMUSG00000062391	4932435O22Rik	RIKEN cDNA 4932435O22 gene	4.59051	2.93457	1.42087	0.506774	0.697479	1
ENSMUSG00000057322	Rpl38	ribosomal protein L38	55.6676	25.8912	2.10729	1.07539	0.0394158	1
ENSMUSG00000010021	Kif19a	kinesin family member 19A	11.1887	8.31682	1.30825	0.38764	0.727403	1
ENSMUSG00000051043	Gprc5c	G protein-coupled receptor, family C, group 5, member C	1902.99	1729.47	1.10027	0.137854	0.528166	1
ENSMUSG00000034652	Cd300a	CD300A molecule	141.085	122.6	1.14955	0.201072	0.659797	1
ENSMUSG00000063193	Cd300lb	CD300 molecule like family member B	23.4187	21.2382	1.09805	0.134949	0.863684	1
ENSMUSG00000034641	Cd300ld	CD300 molecule like family member d	168.893	109.785	1.53354	0.616867	0.196261	1
ENSMUSG00000044811	Cd300c2	CD300C molecule 2	70.5437	70.3648	1.00251	0.00361122	0.955716	1
ENSMUSG00000069607	Cd300ld3	CD300 molecule like family member D3	2.95394	1.38965	1.65461	0.726489	0.655832	1
ENSMUSG00000048498	Cd300e	CD300E molecule	45.7101	32.0863	1.41177	0.497501	0.60673	1
ENSMUSG00000020733	Slc9a3r1	solute carrier family 9 (sodium/hydrogen exchanger), member 3 regulator 1	1991.39	1783.17	1.11671	0.159249	0.469582	1
ENSMUSG00000020734	Grin2c	glutamate receptor, ionotropic, NMDA2C (epsilon 3)	18.9346	15.8235	1.18493	0.244798	0.778319	1
ENSMUSG00000018861	Fdxr	ferredoxin reductase	118.526	96.0995	1.23097	0.299792	0.398645	1
ENSMUSG00000050910	Cdr2l	cerebellar degeneration-related protein 2-like	90.137	75.7046	1.18816	0.248724	0.509033	1
ENSMUSG00000018858	Mrpl58	mitochondrial ribosomal protein L58	386.3	331.285	1.16557	0.22103	0.377633	1
ENSMUSG00000085072	Ict1os	immature colon carcinoma transcript 1, opposite strand	6.53489	3.5637	1.65105	0.723382	0.575992	1
ENSMUSG00000034566	Atp5h	ATP synthase, H+ transporting, mitochondrial F0 complex, subunit D	529.979	388	1.36498	0.448884	0.0714281	1
ENSMUSG00000016940	Kctd2	potassium channel tetramerisation domain containing 2	319.53	272.676	1.1712	0.227991	0.414104	1
ENSMUSG00000070332	Trim80	tripartite motif-containing 80	4.23964	1.63131	1.99126	0.993683	0.535287	1
ENSMUSG00000085651	Gm11695	predicted gene 11695	103.621	93.173	1.11094	0.151787	0.597141	1
ENSMUSG00000057219	Armc7	armadillo repeat containing 7	80.1161	78.3087	1.02279	0.0325094	0.958182	1
ENSMUSG00000020736	Nt5c	5',3'-nucleotidase, cytosolic	303.42	255.789	1.18548	0.245477	0.417232	1
ENSMUSG00000020739	Nup85	nucleoporin 85	209.687	207.87	1.0087	0.0124907	0.867276	1
ENSMUSG00000020740	Gga3	golgi associated, gamma adaptin ear containing, ARF binding protein 3	312.049	311.5	1.00176	0.00253132	0.970335	1
ENSMUSG00000046756	Mrps7	mitchondrial ribosomal protein S7	430.448	399.495	1.07729	0.107402	0.614	1
ENSMUSG00000020744	Slc25a19	solute carrier family 25 (mitochondrial thiamine pyrophosphate carrier), member 19	536.045	480.543	1.11526	0.15738	0.467073	1
ENSMUSG00000059923	Grb2	growth factor receptor bound protein 2	352.279	336.057	1.04813	0.0678163	0.806729	1
ENSMUSG00000034471	Caskin2	CASK-interacting protein 2	1109.21	1107.3	1.00172	0.00248313	1	1
ENSMUSG00000020782	Llgl2	lethal giant larvae homolog 2 (Drosophila)	1004.94	916.766	1.09608	0.132349	0.651839	1
ENSMUSG00000034427	Myo15b	myosin XVB	1193.43	1089.47	1.09533	0.13137	0.799279	1
ENSMUSG00000087072	Recql5os1	RecQ-like 5, opposite strand 1	6.12067	0.638132	4.34683	2.11996	0.252386	1
ENSMUSG00000020755	Sap30bp	SAP30 binding protein	321.834	316.984	1.01525	0.0218397	0.979026	1
ENSMUSG00000020766	Galk1	galactokinase 1	220.968	191.287	1.15436	0.20709	0.454198	1
ENSMUSG00000020770	Unk	unkempt family zinc finger	266.135	262.445	1.01401	0.0200662	0.965419	1
ENSMUSG00000034341	Wbp2	WW domain binding protein 2	1538.18	1334.82	1.15223	0.204433	0.331273	1
ENSMUSG00000034282	Evpl	envoplakin	547.089	448.529	1.21925	0.285995	0.456127	1
ENSMUSG00000020793	Galr2	galanin receptor 2	20.7409	13.5834	1.4908	0.57609	0.491605	1
ENSMUSG00000020792	Exoc7	exocyst complex component 7	557.943	501.766	1.11174	0.152814	0.543695	1
ENSMUSG00000081929	Rps11-ps2	ribosomal protein S11, pseudogene 2	25.3631	20.0878	1.25016	0.322108	0.645178	1
ENSMUSG00000050628	Ubald2	UBA-like domain containing 2	98.5188	91.0451	1.0812	0.112628	0.807315	1
ENSMUSG00000015869	Prpsap1	phosphoribosyl pyrophosphate synthetase-associated protein 1	402.654	348.978	1.15337	0.205855	0.411489	1
ENSMUSG00000056032	BC018473	cDNA sequence BC018473	3.12368	1.31225	1.78341	0.834637	0.722855	1
ENSMUSG00000056962	Jmjd6	jumonji domain containing 6	469.931	450.071	1.04403	0.0621633	0.850045	1
ENSMUSG00000090266	Mettl23	methyltransferase like 23	155.673	132.636	1.17239	0.229453	0.588174	1
ENSMUSG00000034120	Srsf2	serine/arginine-rich splicing factor 2	144.315	139.929	1.03112	0.0442144	0.99689	1
ENSMUSG00000020818	Mfsd11	major facilitator superfamily domain containing 11	268.337	248.59	1.07912	0.109853	0.633383	1
ENSMUSG00000020823	Sec14l1	SEC14-like lipid binding 1	1286.94	1257.27	1.02358	0.0336308	0.802541	1
ENSMUSG00000059248	Sept9	septin 9	1038.76	967.236	1.07388	0.102826	0.584345	1
ENSMUSG00000086050	Gm16045	predicted gene 16045	8.20313	7.86405	1.03825	0.0541593	0.927318	1
ENSMUSG00000085419	Gm11734	predicted gene 11734	5.63173	4.87595	1.12862	0.174564	0.8913	1
ENSMUSG00000070330	Tmem235	transmembrane protein 235	4.62218	1.96837	1.89403	0.921457	0.545661	1
ENSMUSG00000085434	Gm11725	predicted gene 11725	3.23008	2.46924	1.21931	0.286067	0.884975	1
ENSMUSG00000088119	Gm24060	predicted gene, 24060	12.8253	3.99616	2.76719	1.46842	0.16043	1
ENSMUSG00000033909	Usp36	ubiquitin specific peptidase 36	643.455	628.238	1.02418	0.0344743	0.975231	1
ENSMUSG00000033880	Lgals3bp	lectin, galactoside-binding, soluble, 3 binding protein	909.916	640.427	1.42014	0.506034	0.0450325	1
ENSMUSG00000033857	Engase	endo-beta-N-acetylglucosaminidase	59.0357	52.3339	1.12566	0.170769	0.731325	1
ENSMUSG00000025576	Rbfox3	RNA binding protein, fox-1 homolog (C. elegans) 3	11.9108	8.6691	1.33526	0.417123	0.709004	1
ENSMUSG00000025577	Cbx2	chromobox 2	83.3982	80.7009	1.03301	0.0468602	0.981867	1
ENSMUSG00000025578	Cbx8	chromobox 8	76.2274	68.8844	1.10507	0.144141	0.702055	1
ENSMUSG00000039976	Tbc1d16	TBC1 domain family, member 16	361.098	353.494	1.02145	0.030616	0.834798	1
ENSMUSG00000039963	Ccdc40	coiled-coil domain containing 40	9.6269	9.59975	1.00256	0.00369015	0.979989	1
ENSMUSG00000025579	Gaa	glucosidase, alpha, acid	1070.76	746.525	1.43374	0.519784	0.0364856	1
ENSMUSG00000025580	Eif4a3	eukaryotic translation initiation factor 4A3	245.948	244.658	1.00525	0.00756111	0.925219	1
ENSMUSG00000025582	Nptx1	neuronal pentraxin 1	21.1982	10.3392	1.95766	0.969127	0.235608	1
ENSMUSG00000083870	Gm11761	predicted gene 11761	5.63173	2.91658	1.69325	0.759794	0.571059	1
ENSMUSG00000025371	Chmp6	charged multivesicular body protein 6	342.31	237.963	1.43667	0.522725	0.0642095	1
ENSMUSG00000085207	Gm11767	predicted gene 11767	10.6681	9.56688	1.10422	0.143024	0.842034	1
ENSMUSG00000086924	Gm11766	predicted gene 11766	40.3342	35.0139	1.14773	0.198783	0.69037	1
ENSMUSG00000025372	Baiap2	brain-specific angiogenesis inhibitor 1-associated protein 2	1004.32	808.078	1.24255	0.3133	0.350587	1
ENSMUSG00000039781	Cep131	centrosomal protein 131	179.207	144.582	1.23785	0.307831	0.383816	1
ENSMUSG00000025377	Tepsin	TEPSIN, adaptor related protein complex 4 accessory protein	117.295	108.5	1.08032	0.111462	0.707292	1
ENSMUSG00000078572	Ndufaf8	NADH dehydrogenase (ubiquinone) 1 alpha subcomplex assembly factor 8	132.916	111.556	1.18977	0.250684	0.439017	1
ENSMUSG00000061306	Slc38a10	solute carrier family 38, member 10	1830.91	1814.31	1.00914	0.0131277	0.924064	1
ENSMUSG00000075389	2810410L24Rik	RIKEN cDNA 2810410L24 gene	51.9688	51.803	1.00314	0.00452395	0.930214	1
ENSMUSG00000025380	Fscn2	fascin actin-bundling protein 2	13.3345	10.4944	1.24709	0.318561	0.898846	1
ENSMUSG00000025384	Faap100	Fanconi anemia core complex associated protein 100	181.091	156.959	1.15277	0.205109	0.507743	1
ENSMUSG00000039703	Nploc4	NPL4 homolog, ubiquitin recognition factor	634.562	626.442	1.01294	0.0185496	0.897725	1
ENSMUSG00000039670	Oxld1	oxidoreductase like domain containing 1	81.1687	73.6913	1.10011	0.13765	0.620428	1
ENSMUSG00000057594	Arl16	ADP-ribosylation factor-like 16	61.3196	45.8917	1.32901	0.410354	0.328547	1
ENSMUSG00000025793	Hgs	HGF-regulated tyrosine kinase substrate	904.483	872.075	1.03712	0.0525831	0.777971	1
ENSMUSG00000039640	Mrpl12	mitochondrial ribosomal protein L12	554.215	508.173	1.09042	0.12489	0.557606	1
ENSMUSG00000086929	Gm11788	predicted gene 11788	20.3584	11.2491	1.74367	0.802131	0.342307	1
ENSMUSG00000025792	Slc25a10	solute carrier family 25 (mitochondrial carrier, dicarboxylate transporter), member 10	1734.11	1473.99	1.17635	0.234319	0.568067	1
ENSMUSG00000061111	Mcrip1	MAPK regulated corepressor interacting protein 1	309.805	286.895	1.07958	0.110471	0.678009	1
ENSMUSG00000025132	Arhgdia	Rho GDP dissociation inhibitor (GDI) alpha	2435.64	2434.24	1.00058	0.000831396	0.987319	1
ENSMUSG00000025135	Anapc11	anaphase promoting complex subunit 11	227.448	179.168	1.26798	0.342527	0.289048	1
ENSMUSG00000044034	Npb	neuropeptide B	10.8062	4.16896	2.28406	1.1916	0.273388	1
ENSMUSG00000025138	Sirt7	sirtuin 7	325.863	307.827	1.0584	0.0818866	0.736152	1
ENSMUSG00000084822	Myadml2os	myeloid-associated differentiation marker-like 2, opposite strand	3.88877	1.73571	1.78702	0.837557	0.647209	1
ENSMUSG00000053613	Notumos	notum pectinacetylesterase homolog (Drosophila), opposite strand	14.5886	7.90592	1.75036	0.807653	0.461897	1
ENSMUSG00000025144	Cenpx	centromere protein X	220.35	200.004	1.10122	0.139106	0.636218	1
ENSMUSG00000018012	Rac3	RAS-related C3 botulinum substrate 3	59.6197	28.8851	2.02843	1.02036	0.0366329	1
ENSMUSG00000039450	Dcxr	dicarbonyl L-xylulose reductase	666.016	466.924	1.42548	0.511447	0.11392	1
ENSMUSG00000025150	Cbr2	carbonyl reductase 2	39.5805	31.867	1.23469	0.304148	0.496238	1
ENSMUSG00000025158	Rfng	RFNG O-fucosylpeptide 3-beta-N-acetylglucosaminyltransferase	426.815	386.987	1.10265	0.140981	0.552691	1
ENSMUSG00000025155	Dus1l	dihydrouridine synthase 1-like (S. cerevisiae)	332.862	295.664	1.12539	0.170423	0.586316	1
ENSMUSG00000048445	Ccdc57	coiled-coil domain containing 57	203.265	200.844	1.01199	0.0171979	1	1
ENSMUSG00000025165	Sectm1a	secreted and transmembrane 1A	19.4438	13.4861	1.41127	0.496999	0.791205	1
ENSMUSG00000082510	Gm11793	predicted gene 11793	5.52534	1.29426	2.84421	1.50803	0.319904	1
ENSMUSG00000025169	Ogfod3	2-oxoglutarate and iron-dependent oxygenase domain containing 3	125.125	89.4191	1.39489	0.48015	0.197293	1
ENSMUSG00000000056	Narf	nuclear prelamin A recognition factor	651.419	570.102	1.14239	0.19205	0.397904	1
ENSMUSG00000025173	Wdr45b	WD repeat domain 45B	350.95	293.668	1.1944	0.256282	0.37437	1
ENSMUSG00000039253	Fn3krp	fructosamine 3 kinase related protein	216.622	201.799	1.07309	0.101773	0.722665	1
ENSMUSG00000025175	Fn3k	fructosamine 3 kinase	227.394	191.687	1.18531	0.245266	0.542192	1
ENSMUSG00000039230	Tbcd	tubulin-specific chaperone d	322.219	295.098	1.0916	0.126438	0.604656	1
ENSMUSG00000039238	Zfp750	zinc finger protein 750	106.754	103.227	1.03384	0.0480094	0.937146	1
ENSMUSG00000046605	B3gntl1	UDP-GlcNAc:betaGal beta-1,3-N-acetylglucosaminyltransferase-like 1	90.7095	83.8781	1.08049	0.11168	0.763269	1
ENSMUSG00000039208	Metrnl	meteorin, glial cell differentiation regulator-like	210.703	160.086	1.31422	0.394208	0.201955	1
ENSMUSG00000079179	Rab10os	RAB10, member RAS oncogene family, opposite strand	56.1451	50.5323	1.10892	0.149154	0.710597	1
ENSMUSG00000020668	Kif3c	kinesin family member 3C	233.655	233.452	1.00087	0.00124888	0.991779	1
ENSMUSG00000071454	Dtnb	dystrobrevin, beta	455.478	434.68	1.04774	0.0672777	0.842064	1
ENSMUSG00000092286	Dtnbos	dystrobrevin, beta, opposite strand	28.3373	20.028	1.39516	0.480427	0.553957	1
ENSMUSG00000073242	Dnmt3aos	DNA methyltransferase 3A, opposite strand	20.1456	12.3102	1.58867	0.667824	0.428601	1
ENSMUSG00000020652	Cenpo	centromere protein O	58.918	48.433	1.2121	0.277514	0.567749	1
ENSMUSG00000091619	Gm3625	predicted gene 3625	3.36815	2.34685	1.30515	0.384219	0.885482	1
ENSMUSG00000050545	Fam228b	family with sequence similarity 228, member B	30.25	28.217	1.06958	0.097051	1	1
ENSMUSG00000037361	Sf3b6	splicing factor 3B, subunit 6	404.553	311.227	1.2989	0.377294	0.160907	1
ENSMUSG00000051721	Wdcp	WD repeat and coiled coil containing	101.717	80.4547	1.26103	0.334608	0.349181	1
ENSMUSG00000037735	2810032G03Rik	RIKEN cDNA 2810032G03 gene	6.35377	0.42346	5.16612	2.36908	0.107242	1
ENSMUSG00000073233	Gm9144	predicted gene 9144	409.569	326.028	1.25546	0.328212	0.192431	1
ENSMUSG00000037660	Gdf7	growth differentiation factor 7	5.93955	1.93239	2.36652	1.24277	0.428765	1
ENSMUSG00000020605	Hs1bp3	HCLS1 binding protein 3	146.389	127.285	1.14892	0.200274	0.496171	1
ENSMUSG00000054364	Rhob	ras homolog family member B	2210.61	1954.25	1.13111	0.177744	0.510599	1
ENSMUSG00000066643	Wdr35	WD repeat domain 35	319.552	293.457	1.08862	0.122502	0.580946	1
ENSMUSG00000066637	Ttc32	tetratricopeptide repeat domain 32	62.105	53.7522	1.15256	0.204838	0.685459	1
ENSMUSG00000060647	Gm7099	predicted gene 7099	51.3418	42.0784	1.21504	0.280999	0.689824	1
ENSMUSG00000020621	Rdh14	retinol dehydrogenase 14 (all-trans and 9-cis)	209.609	200.18	1.04687	0.0660861	0.733445	1
ENSMUSG00000066632	Pgk1-rs7	phosphoglycerate kinase-1, related sequence-7	96.8619	68.7562	1.40291	0.488426	0.21475	1
ENSMUSG00000043673	Kcns3	potassium voltage-gated channel, delayed-rectifier, subfamily S, member 3	36.6899	31.6019	1.15607	0.209223	0.653883	1
ENSMUSG00000020608	Smc6	structural maintenance of chromosomes 6	1052.96	1043.69	1.00887	0.0127405	0.964694	1
ENSMUSG00000066629	Rpl36-ps3	ribosomal protein L36, pseudogene 3	32.4933	29.5318	1.097	0.133562	0.675827	1
ENSMUSG00000037169	Mycn	v-myc avian myelocytomatosis viral related oncogene, neuroblastoma derived	91.0401	72.9902	1.24395	0.314929	0.453403	1
ENSMUSG00000037149	Ddx1	DEAD (Asp-Glu-Ala-Asp) box polypeptide 1	742.18	665.236	1.11549	0.15768	0.475827	1
ENSMUSG00000020576	Nbas	neuroblastoma amplified sequence	635.214	609.74	1.04171	0.0589527	0.831247	1
ENSMUSG00000020607	Fam84a	family with sequence similarity 84, member A	285.877	227.748	1.25412	0.326674	0.25728	1
ENSMUSG00000036523	Greb1	gene regulated by estrogen in breast cancer protein	28.0295	17.4097	1.57686	0.657054	0.316284	1
ENSMUSG00000057469	E2f6	E2F transcription factor 6	153.772	118.764	1.29231	0.369955	0.254946	1
ENSMUSG00000045679	Pqlc3	PQ loop repeat containing	123.341	103.09	1.19455	0.256471	0.756783	1
ENSMUSG00000073198	Bnip3l-ps	BCL2/adenovirus E1B interacting protein 3-like, pseudogene	149.234	122.668	1.21481	0.280736	0.522155	1
ENSMUSG00000073179	Gm10478	predicted gene 10478	5.80148	5.58871	1.03229	0.0458518	0.938447	1
ENSMUSG00000069755	Zfp125	zinc finger protein 125	15.1092	14.7552	1.02247	0.0320529	0.981488	1
ENSMUSG00000062352	Itgb1bp1	integrin beta 1 binding protein 1	249.636	191.138	1.30446	0.383451	0.204943	1
ENSMUSG00000092373	Gm20535	predicted gene 20535	8.40455	7.07654	1.16443	0.219621	0.93873	1
ENSMUSG00000054309	Cpsf3	cleavage and polyadenylation specificity factor 3	751.569	690.888	1.0877	0.121286	0.66097	1
ENSMUSG00000070166	Gm25821	predicted gene, 25821	5.90788	4.30034	1.30329	0.382157	0.719933	1
ENSMUSG00000062054	Iah1	isoamyl acetate-hydrolyzing esterase 1 homolog	428.918	294.154	1.45659	0.542593	0.0448455	1
ENSMUSG00000076432	Ywhaq	tyrosine 3-monooxygenase/tryptophan 5-monooxygenase activation protein theta	307.714	288.902	1.06489	0.090704	0.697583	1
ENSMUSG00000059669	Taf1b	TATA-box binding protein associated factor, RNA polymerase I, B	126.261	122.879	1.0273	0.0388541	0.97941	1
ENSMUSG00000066553	Gm6969	predicted pseudogene 6969	95.8726	93.4863	1.02526	0.0359842	0.917374	1
ENSMUSG00000062563	Cys1	cystin 1	661.253	540.643	1.22268	0.290042	0.253574	1
ENSMUSG00000020646	Mboat2	membrane bound O-acyltransferase domain containing 2	178.549	170.594	1.04636	0.0653757	0.836177	1
ENSMUSG00000036333	Kidins220	kinase D-interacting substrate 220	5829.49	5734.6	1.01654	0.0236738	0.876318	1
ENSMUSG00000020644	Id2	inhibitor of DNA binding 2	2178.2	1595.42	1.36506	0.448962	0.0397795	1
ENSMUSG00000020641	Rsad2	radical S-adenosyl methionine domain containing 2	683.874	514.046	1.32973	0.411138	0.345482	1
ENSMUSG00000063632	Sox11	SRY (sex determining region Y)-box 11	13.0584	8.4482	1.48794	0.573321	0.632719	1
ENSMUSG00000061477	Rps7	ribosomal protein S7	54.7961	43.9716	1.2407	0.311149	0.516776	1
ENSMUSG00000020629	Adi1	acireductone dioxygenase 1	373.886	346.638	1.07838	0.108869	0.695627	1
ENSMUSG00000020628	Trappc12	trafficking protein particle complex 12	482.132	479.848	1.00475	0.00683511	1	1
ENSMUSG00000044573	Acp1	acid phosphatase 1, soluble	134.374	103.555	1.29476	0.372684	0.436153	1
ENSMUSG00000020669	Sh3yl1	Sh3 domain YSC-like 1	252.642	206.855	1.22028	0.287217	0.310005	1
ENSMUSG00000065200	Gm24613	predicted gene, 24613	9.58385	8.23075	1.14659	0.197344	0.864032	1
ENSMUSG00000002900	Lamb1	laminin B1	3218.39	2906.86	1.10714	0.146832	0.497111	1
ENSMUSG00000020664	Dld	dihydrolipoamide dehydrogenase	2245.71	2035.17	1.1034	0.141956	0.489793	1
ENSMUSG00000020659	Cbll1	Casitas B-lineage lymphoma-like 1	124.117	111.482	1.11233	0.153585	0.641448	1
ENSMUSG00000020651	Slc26a4	solute carrier family 26, member 4	684.801	596.235	1.14829	0.199491	0.581598	1
ENSMUSG00000020650	Bcap29	B cell receptor associated protein 29	130.034	124.44	1.0446	0.0629455	0.881056	1
ENSMUSG00000020648	Dus4l	dihydrouridine synthase 4-like (S. cerevisiae)	27.5089	20.5406	1.32349	0.404353	0.634293	1
ENSMUSG00000035933	Cog5	component of oligomeric golgi complex 5	293.424	285.738	1.02681	0.0381638	0.818125	1
ENSMUSG00000044067	Gpr22	G protein-coupled receptor 22	19.668	9.76634	1.91969	0.940873	0.287553	1
ENSMUSG00000020572	Nampt	nicotinamide phosphoribosyltransferase	1383.06	1255.36	1.10165	0.139661	0.589148	1
ENSMUSG00000052125	F730043M19Rik	RIKEN cDNA F730043M19 gene	17.8934	8.639	1.9601	0.970926	0.26339	1
ENSMUSG00000079143	Atxn7l1os1	ataxin 7-like 1, opposite strand 1	19.041	17.0759	1.10872	0.148889	0.831407	1
ENSMUSG00000020561	Twistnb	twist basic helix-loop-helix transcription factor 1 neighbor	209.82	184.263	1.13795	0.186433	0.536167	1
ENSMUSG00000019256	Ahr	aryl-hydrocarbon receptor	349.495	324.907	1.07545	0.104935	0.728356	1
ENSMUSG00000020577	Tspan13	tetraspanin 13	260.37	235.066	1.10719	0.1469	0.627088	1
ENSMUSG00000036188	Ankmy2	ankyrin repeat and MYND domain containing 2	465.341	386.239	1.20427	0.268162	0.313029	1
ENSMUSG00000036169	Sostdc1	sclerostin domain containing 1	1352.5	1107.57	1.22093	0.287985	0.38585	1
ENSMUSG00000043153	Ispd	isoprenoid synthase domain containing	55.4637	28.2673	1.92924	0.948035	0.133608	1
ENSMUSG00000050103	Agmo	alkylglycerol monooxygenase	51.9486	50.8967	1.02027	0.028949	0.80694	1
ENSMUSG00000002565	Scin	scinderin	1766.74	1465.88	1.2051	0.269158	0.265996	1
ENSMUSG00000035983	Gm7008	predicted gene 7008	13.4093	11.6185	1.14191	0.191452	0.882395	1
ENSMUSG00000036295	Lrrn3	leucine rich repeat protein 3, neuronal	22.3344	19.9624	1.11316	0.15466	0.939915	1
ENSMUSG00000020598	Nrcam	neuronal cell adhesion molecule	25.4264	23.2331	1.09051	0.125005	0.922803	1
ENSMUSG00000046314	Stxbp6	syntaxin binding protein 6 (amisyn)	314.767	259.68	1.21132	0.276581	0.379208	1
ENSMUSG00000091277	Gm1818	predicted gene 1818	191.492	170.125	1.12486	0.169747	0.552134	1
ENSMUSG00000020952	Scfd1	Sec1 family domain containing 1	395.003	359.812	1.09753	0.134267	0.534313	1
ENSMUSG00000020954	Strn3	striatin, calmodulin binding protein 3	1178.82	1110.36	1.0616	0.0862395	0.773797	1
ENSMUSG00000020955	Ap4s1	adaptor-related protein complex AP-4, sigma 1	95.5242	92.6402	1.0308	0.0437638	0.737205	1
ENSMUSG00000035181	Heatr5a	HEAT repeat containing 5A	497.221	483.162	1.02904	0.0412948	0.96144	1
ENSMUSG00000021010	Npas3	neuronal PAS domain protein 3	4.48411	0.957198	2.80202	1.48647	0.349705	1
ENSMUSG00000035105	Egln3	egl-9 family hypoxia-inducible factor 3	106.584	86.3306	1.23191	0.300902	0.421649	1
ENSMUSG00000044408	Sptssa	serine palmitoyltransferase, small subunit A	168.329	146.732	1.14619	0.196848	0.521974	1
ENSMUSG00000054302	Eapp	E2F-associated phosphoprotein	486.666	476.594	1.02109	0.0301068	0.930581	1
ENSMUSG00000005656	Snx6	sorting nexin 6	626.92	547.106	1.14562	0.196124	0.46483	1
ENSMUSG00000062929	Cfl2	cofilin 2, muscle	271.576	258.166	1.05175	0.0727852	0.706995	1
ENSMUSG00000021022	Ppp2r3c	protein phosphatase 2, regulatory subunit B'', gamma	69.2466	57.4822	1.20116	0.26443	0.694534	1
ENSMUSG00000021023	1110008L16Rik	RIKEN cDNA 1110008L16 gene	112.345	91.9211	1.2198	0.28664	0.344094	1
ENSMUSG00000021024	Psma6	proteasome (prosome, macropain) subunit, alpha type 6	487.456	441.525	1.10379	0.14247	0.529423	1
ENSMUSG00000059033	Rpl18a-ps1	ribosomal protein L18A, pseudogene 1	137.176	115.734	1.18368	0.243285	0.387546	1
ENSMUSG00000063129	Aldoart2	aldolase 1 A, retrogene 2	8.61735	7.50311	1.13104	0.177648	0.832597	1
ENSMUSG00000045440	Insm2	insulinoma-associated 2	3.88877	1.71772	1.79885	0.847077	0.647935	1
ENSMUSG00000021027	Ralgapa1	Ral GTPase activating protein, alpha subunit 1	2178.38	2111.83	1.0315	0.0447428	0.923617	1
ENSMUSG00000046747	Gm9812	predicted gene 9812	5.38726	2.7019	1.7254	0.786931	0.558134	1
ENSMUSG00000012076	Brms1l	breast cancer metastasis-suppressor 1-like	182.61	179.998	1.01443	0.0206709	0.840774	1
ENSMUSG00000066491	Gm6265	predicted pseudogene 6265	2230.56	1760.31	1.26699	0.341404	0.227036	1
ENSMUSG00000001497	Pax9	paired box 9	16.671	3.6501	3.80014	1.92605	0.0692578	1
ENSMUSG00000035472	Slc25a21	solute carrier family 25 (mitochondrial oxodicarboxylate carrier), member 21	110.378	99.5309	1.10789	0.147819	0.711378	1
ENSMUSG00000079104	Prps1l3	phosphoribosyl pyrophosphate synthetase 1-like 3	248.871	233.093	1.0674	0.0941027	0.682149	1
ENSMUSG00000047022	Mipol1	mirror-image polydactyly 1	139.98	134.622	1.03951	0.0558991	0.942757	1
ENSMUSG00000035451	Foxa1	forkhead box A1	6.67296	3.14335	1.85187	0.888985	0.462795	1
ENSMUSG00000045930	Clec14a	C-type lectin domain family 14, member a	538.164	414.83	1.2966	0.374732	0.262486	1
ENSMUSG00000020986	Sec23a	SEC23 homolog A, COPII coat complex component	378.468	347.957	1.08744	0.12093	0.696866	1
ENSMUSG00000065232	Gm22973	predicted gene, 22973	24.1724	22.9269	1.05206	0.0732103	0.934644	1
ENSMUSG00000066487	Gm5786	predicted pseudogene 5786	25.6392	20.4519	1.24181	0.312448	0.667562	1
ENSMUSG00000021000	Ctage5	melanoma inhibitory activity 2	2300.32	2247.62	1.02344	0.0334218	0.875907	1
ENSMUSG00000077505	Gm24233	predicted gene, 24233	152.654	141.18	1.0807	0.111965	0.883274	1
ENSMUSG00000047227	Gm527	predicted gene 527	18.2126	17.7136	1.02667	0.0379669	0.862421	1
ENSMUSG00000020948	Klhl28	kelch-like 28	83.654	62.2698	1.33799	0.420062	0.364792	1
ENSMUSG00000020949	Fkbp3	FK506 binding protein 3	252.961	233.784	1.08168	0.113271	0.698752	1
ENSMUSG00000055884	Fancm	Fanconi anemia, complementation group M	189.271	185.069	1.02258	0.0322191	0.91684	1
ENSMUSG00000049751	Rpl36al	ribosomal protein L36A-like	366.039	352.148	1.03934	0.0556626	0.796414	1
ENSMUSG00000043998	Mgat2	mannoside acetylglucosaminyltransferase 2	855.204	763.655	1.11973	0.163146	0.421066	1
ENSMUSG00000020973	Dnaaf2	dynein, axonemal assembly factor 2	77.2889	64.7921	1.18994	0.250893	0.61707	1
ENSMUSG00000020974	Pole2	polymerase (DNA directed), epsilon 2 (p59 subunit)	23.0045	14.8537	1.51412	0.598482	0.398391	1
ENSMUSG00000051890	Klhdc1	kelch domain containing 1	47.6139	43.6907	1.08778	0.121393	0.676606	1
ENSMUSG00000020978	Klhdc2	kelch domain containing 2	568.833	519.885	1.09397	0.129572	0.568564	1
ENSMUSG00000044147	Arf6	ADP-ribosylation factor 6	1053	960.166	1.09658	0.133011	0.564766	1
ENSMUSG00000020988	L2hgdh	L-2-hydroxyglutarate dehydrogenase	577.959	373.482	1.54603	0.628565	0.0162099	1
ENSMUSG00000054894	Atp5s	ATP synthase, H+ transporting, mitochondrial F0 complex, subunit S	70.6704	53.8336	1.30705	0.386317	0.334764	1
ENSMUSG00000020990	Cdkl1	cyclin-dependent kinase-like 1 (CDC2-related kinase)	1851.67	1265.78	1.4625	0.548441	0.0160235	1
ENSMUSG00000020992	4930512B01Rik	RIKEN cDNA 4930512B01 gene	145.793	117.388	1.23993	0.310257	0.28882	1
ENSMUSG00000034761	Map4k5	mitogen-activated protein kinase kinase kinase kinase 5	529.488	495.329	1.06882	0.096021	0.754722	1
ENSMUSG00000079076	Gm3086	predicted gene 3086	4.79193	4.59242	1.03567	0.05057	1	1
ENSMUSG00000021072	Tmx1	thioredoxin-related transmembrane protein 1	416.421	390.293	1.06677	0.0932527	0.765731	1
ENSMUSG00000021076	Actr10	ARP10 actin-related protein 10	246.564	228.671	1.07791	0.108232	0.672962	1
ENSMUSG00000034574	Daam1	dishevelled associated activator of morphogenesis 1	808.054	750.221	1.07698	0.106997	0.651953	1
ENSMUSG00000019718	L3hypdh	L-3-hydroxyproline dehydratase (trans-)	144.942	82.7551	1.74248	0.801146	0.0233395	1
ENSMUSG00000005078	Jkamp	JNK1/MAPK8-associated membrane protein	105.893	90.8522	1.16375	0.218787	0.603301	1
ENSMUSG00000021087	Rtn1	reticulon 1	89.3175	84.5339	1.05593	0.0785085	0.878809	1
ENSMUSG00000021094	Dhrs7	dehydrogenase/reductase (SDR family) member 7	178.008	147.962	1.2017	0.265082	0.406505	1
ENSMUSG00000051367	Six1	sine oculis-related homeobox 1	3.88877	3.10737	1.19024	0.251256	0.943015	1
ENSMUSG00000021103	Mnat1	menage a trois 1	216.273	163.876	1.3178	0.398127	0.188185	1
ENSMUSG00000034442	Trmt5	TRM5 tRNA methyltransferase 5	73.8688	64.9025	1.13605	0.184031	0.709047	1
ENSMUSG00000044712	Slc38a6	solute carrier family 38, member 6	129.557	106.487	1.21463	0.280514	0.442867	1
ENSMUSG00000034435	Tmem30b	transmembrane protein 30B	325.141	286.435	1.13466	0.18226	0.420892	1
ENSMUSG00000021113	Snapc1	small nuclear RNA activating complex, polypeptide 1	182.981	180.748	1.01228	0.0176142	1	1
ENSMUSG00000021051	Ppp2r5e	protein phosphatase 2, regulatory subunit B', epsilon	1115.14	1055.55	1.0564	0.0791604	0.687881	1
ENSMUSG00000021055	Esr2	estrogen receptor 2 (beta)	8.78709	6.74848	1.2631	0.336967	0.839591	1
ENSMUSG00000021048	Mthfd1	methylenetetrahydrofolate dehydrogenase (NADP+ dependent), methenyltetrahydrofolate cyclohydrolase, formyltetrahydrofolate synthase	3356.22	2710.64	1.23808	0.308105	0.142053	1
ENSMUSG00000059970	Hspa2	heat shock protein 2	305.758	257.064	1.18869	0.249376	0.392406	1
ENSMUSG00000073000	Gm10451	predicted gene 10451	38.2404	35.7717	1.06713	0.0937414	0.952854	1
ENSMUSG00000021061	Sptb	spectrin beta, erythrocytic	397.753	379.908	1.04685	0.0660546	0.767281	1
ENSMUSG00000033373	Fntb	farnesyltransferase, CAAX box, beta	77.3117	69.9924	1.1031	0.141563	0.738649	1
ENSMUSG00000021062	Rab15	RAB15, member RAS oncogene family	90.0622	84.2155	1.06861	0.0957371	0.702075	1
ENSMUSG00000059436	Max	Max protein	431.173	378.858	1.13772	0.186146	0.445574	1
ENSMUSG00000021065	Fut8	fucosyltransferase 8	667.078	632.239	1.05502	0.0772656	0.751599	1
ENSMUSG00000047454	Gphn	gephyrin	762.631	655.038	1.164	0.219096	0.373729	1
ENSMUSG00000056987	Fam71d	family with sequence similarity 71, member D	9.30771	8.06073	1.13762	0.186025	0.963312	1
ENSMUSG00000021114	Atp6v1d	ATPase, H+ transporting, lysosomal V1 subunit D	1329.05	1211.36	1.09707	0.133661	0.513995	1
ENSMUSG00000021118	Plek2	pleckstrin 2	29.4216	25.5448	1.14605	0.196665	0.879779	1
ENSMUSG00000046157	Tmem229b	transmembrane protein 229B	119.4	117.252	1.01817	0.0259733	0.976867	1
ENSMUSG00000060716	Plekhh1	pleckstrin homology domain containing, family H (with MyTH4 domain) member 1	307.18	293.207	1.04749	0.0669399	0.856436	1
ENSMUSG00000021125	Arg2	arginase type II	60.652	31.4792	1.8982	0.924633	0.153602	1
ENSMUSG00000021124	Vti1b	vesicle transport through interaction with t-SNAREs 1B	914.183	892.534	1.02423	0.034537	0.848674	1
ENSMUSG00000091507	Gm17194	predicted gene 17194	6.91743	3.25363	1.86133	0.896337	0.480544	1
ENSMUSG00000021123	Rdh12	retinol dehydrogenase 12	17.203	14.2902	1.1905	0.251567	0.634408	1
ENSMUSG00000049106	Dcaf5	DDB1 and CUL4 associated factor 5	652.405	597.744	1.09129	0.126039	0.566319	1
[truncated: 6,616 more rows]

## Sheet: up_young_male
Table S4 Differentially expressed genes, young female vs. young male mice CoRL, up in male/down in female
gene.id	gene.symbol	gene.name	Female	Male	foldChange	log2FoldChange	pval	padj
ENSMUSG00000041698	Slco1a1	solute carrier organic anion transporter family, member 1a1	6.49184	1335.12	0.00560715	-7.47852	1.29529e-51	3.21767e-48
ENSMUSG00000028571	Cyp2j13	cytochrome P450, family 2, subfamily j, polypeptide 13	8.40455	2297.56	0.00409149	-7.93316	3.32481e-30	6.6074e-27
ENSMUSG00000041052	Slc7a13	solute carrier family 7, (cationic amino acid transporter, y+ system) member 13	6.94911	2256.99	0.00352044	-8.15003	1.82909e-26	3.30449e-23
ENSMUSG00000066071	Cyp4a12a	cytochrome P450, family 4, subfamily a, polypeptide 12a	88.5548	896.853	0.0997433	-3.32564	3.1611e-26	4.83234e-23
ENSMUSG00000061906	Ugt2b38	UDP glucuronosyltransferase 2 family, polypeptide B38	494.228	2642.59	0.187332	-2.41633	1.2745e-14	1.2061e-11
ENSMUSG00000032854	Ugt8a	UDP galactosyltransferase 8A	100.868	525.726	0.193399	-2.37034	7.86851e-14	6.79874e-11
ENSMUSG00000025479	Cyp2e1	cytochrome P450, family 2, subfamily e, polypeptide 1	464.23	3997.72	0.116345	-3.10352	3.31087e-13	2.74153e-10
ENSMUSG00000068086	Cyp2d9	cytochrome P450, family 2, subfamily d, polypeptide 9	15.8109	158.684	0.105276	-3.24775	1.94317e-12	1.54466e-09
ENSMUSG00000030935	Acsm3	acyl-CoA synthetase medium-chain family member 3	27.8078	853.074	0.0337299	-4.88983	3.60676e-10	2.23025e-07
ENSMUSG00000002944	Cd36	CD36 antigen	357.2	1150.03	0.3112	-1.68409	6.07205e-10	3.54912e-07
ENSMUSG00000028088	Fmo5	flavin containing monooxygenase 5	152.624	551.548	0.278029	-1.84669	7.513e-10	4.26588e-07
ENSMUSG00000030359	Pzp	pregnancy zone protein	11.4332	635.558	0.0195319	-5.67802	2.48454e-09	1.37153e-06
ENSMUSG00000031725	Ces1f	carboxylesterase 1F	185.607	2244.9	0.0830878	-3.58922	1.16068e-08	6.07008e-06
ENSMUSG00000037053	Azgp1	alpha-2-glycoprotein 1, zinc	58.4493	329.693	0.179772	-2.47576	2.54985e-08	1.26683e-05
ENSMUSG00000032758	Kap	kidney androgen regulated protein	5299.65	27630.8	0.191832	-2.38209	3.92553e-08	1.85743e-05
ENSMUSG00000028713	Cyp4b1	cytochrome P450, family 4, subfamily b, polypeptide 1	2575.15	11877.9	0.216867	-2.20512	3.87654e-06	0.00144737
ENSMUSG00000042410	Agps	alkylglycerone phosphate synthase	757.24	1691.29	0.448056	-1.15825	6.47688e-06	0.00229848
ENSMUSG00000057074	Ces1g	carboxylesterase 1G	5.31254	70.2392	0.0886104	-3.49638	1.52977e-05	0.00490341
ENSMUSG00000029311	Hsd17b11	hydroxysteroid (17-beta) dehydrogenase 11	826.441	1729.8	0.478067	-1.06472	3.08239e-05	0.00914272
ENSMUSG00000064373	Selenop	selenoprotein P	5383.11	11275.2	0.477476	-1.0665	3.18953e-05	0.00932142
ENSMUSG00000037852	Cpe	carboxypeptidase E	92.3575	247.706	0.375372	-1.41361	3.23935e-05	0.0093298
ENSMUSG00000033715	Akr1c14	aldo-keto reductase family 1, member C14	110.446	360.873	0.307969	-1.69914	6.5243e-05	0.018008
ENSMUSG00000074207	Adh1	alcohol dehydrogenase 1 (class I)	482.406	1195.24	0.404105	-1.3072	9.54861e-05	0.0238545
ENSMUSG00000020241	Col6a2	collagen, type VI, alpha 2	185.5	418.725	0.44434	-1.17026	0.000131452	0.0310993
ENSMUSG00000022261	Sdc2	syndecan 2	429.323	877.718	0.489717	-1.02998	0.000143895	0.0332515
ENSMUSG00000052562	Slc22a30	solute carrier family 22, member 30	58.0148	483.033	0.121923	-3.03596	0.000173149	0.0386627
ENSMUSG00000021263	Degs2	delta(4)-desaturase, sphingolipid 2	46.9325	153.03	0.311189	-1.68414	0.000251805	0.0538077
ENSMUSG00000024866	Acy3	aspartoacylase (aminoacylase) 3	1609.32	5242.07	0.307132	-1.70307	0.000249728	0.0538077
ENSMUSG00000026415	Fcamr	Fc receptor, IgA, IgM, high affinity	99.1369	265.04	0.376397	-1.40967	0.000262818	0.0549788
ENSMUSG00000061825	Ces2c	carboxylesterase 2C	66.2699	211.962	0.315878	-1.66256	0.00033038	0.0643691
ENSMUSG00000024620	Pdgfrb	platelet derived growth factor receptor, beta polypeptide	282.236	608.09	0.465015	-1.10465	0.000378715	0.0710018
ENSMUSG00000015027	Galns	galactosamine (N-acetyl)-6-sulfate sulfatase	260.134	581.57	0.448245	-1.15764	0.000383421	0.0711187
ENSMUSG00000031441	Atp11a	ATPase, class VI, type 11A	2360.81	9555.96	0.24713	-2.01666	0.000404007	0.0734366
ENSMUSG00000041324	Inhba	inhibin beta-A	7.82059	45.054	0.191527	-2.38438	0.000524534	0.090644
ENSMUSG00000024795	Kif20b	kinesin family member 20B	65.7923	159.065	0.417283	-1.2609	0.000636211	0.105362
ENSMUSG00000040413	Timd2	T cell immunoglobulin and mucin domain containing 2	19.4666	189.749	0.107296	-3.22033	0.000732774	0.118394
ENSMUSG00000025780	Itih5	inter-alpha (globulin) inhibitor H5	40.5153	113.809	0.361604	-1.46752	0.000783757	0.12561
ENSMUSG00000056481	Cd248	CD248 antigen, endosialin	40.2075	113.501	0.359888	-1.47438	0.000880188	0.136656
ENSMUSG00000038224	Serpinf2	serine (or cysteine) peptidase inhibitor, clade F, member 2	215.834	830.411	0.260803	-1.93897	0.000892811	0.137541
ENSMUSG00000024921	Smarca2	SWI/SNF related, matrix associated, actin dependent regulator of chromatin, subfamily a, member 2	3674.15	6316.08	0.58178	-0.781453	0.00119918	0.179094
ENSMUSG00000057425	Ugt2b37	UDP glucuronosyltransferase 2 family, polypeptide B37	20.3267	143.707	0.147379	-2.7624	0.0012076	0.179094
ENSMUSG00000061808	Ttr	transthyretin	289.735	788.453	0.368274	-1.44115	0.00137454	0.197944
ENSMUSG00000037386	Rims2	regulating synaptic membrane exocytosis 2	36.2643	96.4345	0.382455	-1.38664	0.00149502	0.209229
ENSMUSG00000050010	Shisa3	shisa family member 3	75.5687	172.965	0.440138	-1.18397	0.00163285	0.225345
ENSMUSG00000017817	Jph2	junctophilin 2	60.3531	139.993	0.435149	-1.20042	0.00198654	0.2547
ENSMUSG00000003477	Inmt	indolethylamine N-methyltransferase	858.504	1805.11	0.475886	-1.07131	0.00196811	0.2547
ENSMUSG00000084241	Gm13416	predicted gene 13416	58.3657	137.584	0.428372	-1.22306	0.00227191	0.283961
ENSMUSG00000054006	D630008O14Rik	RIKEN cDNA D630008O14 gene	3.23008	25.8044	0.157813	-2.66371	0.00230005	0.285681
ENSMUSG00000017929	B4galt5	UDP-Gal:betaGlcNAc beta 1,4-galactosyltransferase, polypeptide 5	708.789	1225.45	0.578732	-0.789033	0.00240164	0.296446
ENSMUSG00000025790	Slco3a1	solute carrier organic anion transporter family, member 3a1	420.237	995.473	0.422728	-1.2422	0.00266187	0.318417
ENSMUSG00000015568	Lpl	lipoprotein lipase	2983.34	5068.68	0.588664	-0.764483	0.00267577	0.318417
ENSMUSG00000022244	Amacr	alpha-methylacyl-CoA racemase	505.919	999.135	0.506851	-0.980367	0.00321326	0.364048
ENSMUSG00000047963	Stbd1	starch binding domain 1	52.288	151.643	0.349102	-1.51828	0.00327511	0.364048
ENSMUSG00000000049	Apoh	apolipoprotein H	0.520614	15.6236	0.0914733	-3.45051	0.00361561	0.386307
ENSMUSG00000079494	Nat8f5	N-acetyltransferase 8 (GCN5-related) family member 5	21.8772	85.079	0.26577	-1.91175	0.0045248	0.452979
ENSMUSG00000019539	Rcn3	reticulocalbin 3, EF-hand calcium binding domain	88.2559	184.332	0.4816	-1.05409	0.00455874	0.452979
ENSMUSG00000041559	Fmod	fibromodulin	101.547	223.497	0.456788	-1.1304	0.00475231	0.465235
ENSMUSG00000079105	C7	complement component 7	24.4486	123.848	0.203836	-2.29452	0.00497345	0.482134
ENSMUSG00000036083	Slc17a3	solute carrier family 17 (sodium phosphate), member 3	755.739	1644.96	0.459756	-1.12106	0.00503306	0.485543
ENSMUSG00000074254	Cyp2a4	cytochrome P450, family 2, subfamily a, polypeptide 4	260.669	693.97	0.376518	-1.40921	0.00532136	0.510876
ENSMUSG00000024644	Cndp2	CNDP dipeptidase 2 (metallopeptidase M20 family)	1214.99	4340.23	0.280103	-1.83597	0.00537152	0.51201
ENSMUSG00000034612	Chst11	carbohydrate sulfotransferase 11	255.423	637.13	0.401836	-1.31532	0.00578825	0.537523
ENSMUSG00000058914	C1qtnf3	C1q and tumor necrosis factor related protein 3	128.463	300.634	0.429208	-1.22025	0.00597984	0.548411
ENSMUSG00000091383	Hist1h2al	histone cluster 1, H2al	1.04123	105.949	0.019086	-5.71134	0.00605232	0.549214
ENSMUSG00000074469	Gm15348	predicted gene 15348	3.33648	35.8046	0.117824	-3.08529	0.00765506	0.664319
ENSMUSG00000026109	Tmeff2	transmembrane protein with EGF-like and two follistatin-like domains 2	5.8762	30.7698	0.216438	-2.20797	0.00851267	0.70773
ENSMUSG00000020542	Myocd	myocardin	47.1769	160.99	0.297407	-1.74949	0.00875022	0.718566
ENSMUSG00000086893	Gm11365	predicted gene 11365	2.29525	20.1418	0.155864	-2.68164	0.00898083	0.731459
ENSMUSG00000040247	Tbc1d10c	TBC1 domain family, member 10c	9.38243	37.0463	0.272889	-1.87361	0.00905915	0.734826
ENSMUSG00000029675	Eln	elastin	145.112	296.217	0.491599	-1.02445	0.00972113	0.772752
ENSMUSG00000032744	Heyl	hairy/enhancer-of-split related with YRPW motif-like	93.7699	175.883	0.535776	-0.900298	0.00978066	0.774194
ENSMUSG00000026208	Des	desmin	90.422	222.103	0.409775	-1.2871	0.0101755	0.789911
ENSMUSG00000085234	Gm15614	predicted gene 15614	0	10.0079	0.090844	-3.46047	0.0104534	0.800486
ENSMUSG00000022665	Ccdc80	coiled-coil domain containing 80	450.725	733.2	0.615262	-0.700727	0.0106186	0.802368
ENSMUSG00000016995	Matn4	matrilin 4	20.1773	52.7538	0.393968	-1.34385	0.0110249	0.826788
ENSMUSG00000012187	Mogat1	monoacylglycerol O-acyltransferase 1	112.555	224.1	0.504464	-0.987177	0.0113625	0.841124
ENSMUSG00000023046	Igfbp6	insulin-like growth factor binding protein 6	4.51578	24.767	0.214064	-2.22389	0.0113841	0.841124
ENSMUSG00000063415	Cyp26b1	cytochrome P450, family 26, subfamily b, polypeptide 1	46.9869	1117.8	0.0428913	-4.54317	0.0113854	0.841124
ENSMUSG00000071178	Serpina1b	serine (or cysteine) preptidase inhibitor, clade A, member 1B	1.04123	13.3543	0.142204	-2.81397	0.0122374	0.875933
ENSMUSG00000030409	Dmpk	dystrophia myotonica-protein kinase	174.45	385.302	0.454178	-1.13867	0.0121751	0.875933
ENSMUSG00000087876	Gm26102	predicted gene, 26102	1.04123	13.8668	0.137301	-2.86458	0.0122533	0.875933
ENSMUSG00000091813	Ces2h	carboxylesterase 2H	1.04123	13.8433	0.137518	-2.86231	0.0122992	0.876065
ENSMUSG00000026077	Npas2	neuronal PAS domain protein 2	50.0042	107.948	0.468151	-1.09495	0.0129121	0.898117
ENSMUSG00000031825	Crispld2	cysteine-rich secretory protein LCCL domain containing 2	71.1163	138.357	0.517494	-0.950386	0.0129	0.898117
ENSMUSG00000026837	Col5a1	collagen, type V, alpha 1	114.384	244.05	0.47086	-1.08663	0.0130387	0.899091
ENSMUSG00000031595	Pdgfrl	platelet-derived growth factor receptor-like	13.5904	44.7911	0.31863	-1.65005	0.0130749	0.899091
ENSMUSG00000036545	Adamts2	a disintegrin-like and metallopeptidase (reprolysin type) with thrombospondin type 1 motif, 2	97.4256	196.859	0.497454	-1.00736	0.0133538	0.911962
ENSMUSG00000022877	Hrg	histidine-rich glycoprotein	4.93	23.0548	0.24652	-2.02022	0.0136589	0.920144
ENSMUSG00000039519	Cyp7b1	cytochrome P450, family 7, subfamily b, polypeptide 1	29.0707	89.5649	0.332035	-1.59059	0.0140605	0.931414
ENSMUSG00000045690	Wdr89	WD repeat domain 89	8.37288	32.8723	0.276712	-1.85354	0.0144314	0.949653
ENSMUSG00000050050	Ccdc158	coiled-coil domain containing 158	6.70464	27.8439	0.267115	-1.90447	0.0146045	0.955039
ENSMUSG00000048332	Lhfp	lipoma HMGIC fusion partner	65.6023	131.488	0.502704	-0.992219	0.0150972	0.974114
ENSMUSG00000082570	Gm15711	predicted gene 15711	37.3803	82.1946	0.461331	-1.11612	0.015353	0.98741
ENSMUSG00000051951	Xkr4	X-linked Kx blood group related 4	3.61263	4.90838	0.780692	-0.357174	0.82963	1
ENSMUSG00000025900	Rp1	retinitis pigmentosa 1 (human)	17.203	20.0697	0.863941	-0.210995	0.990839	1
ENSMUSG00000025902	Sox17	SRY (sex determining region Y)-box 17	406.545	422.59	0.962122	-0.0557076	0.875168	1
ENSMUSG00000033845	Mrpl15	mitochondrial ribosomal protein L15	295.036	297.124	0.992995	-0.0101421	0.943915	1
ENSMUSG00000025903	Lypla1	lysophospholipase 1	770.031	873.013	0.882174	-0.180865	0.525534	1
ENSMUSG00000033813	Tcea1	transcription elongation factor A (SII) 1	223.304	241.436	0.92521	-0.112147	0.685417	1
ENSMUSG00000025907	Rb1cc1	RB1-inducible coiled-coil 1	1374.43	1460.09	0.941369	-0.0871673	0.739805	1
ENSMUSG00000090031	4732440D04Rik	RIKEN cDNA 4732440D04 gene	74.335	75.5894	0.983621	-0.0238252	0.856777	1
ENSMUSG00000086235	Gm16284	predicted gene 16284	8.2348	13.1095	0.654511	-0.611512	0.534914	1
ENSMUSG00000084353	Gm15452	predicted gene 15452	39.3994	46.2563	0.8549	-0.226173	0.706708	1
ENSMUSG00000061024	Rrs1	ribosome biogenesis regulator 1	247.211	259.419	0.953124	-0.0692639	0.77046	1
ENSMUSG00000025911	Adhfe1	alcohol dehydrogenase, iron containing, 1	561.621	649.536	0.864858	-0.209465	0.668347	1
ENSMUSG00000079671	2610203C22Rik	RIKEN cDNA 2610203C22 gene	58.1326	64.9248	0.89697	-0.156869	0.76773	1
ENSMUSG00000025912	Mybl1	myeloblastosis oncogene-like 1	21.7188	22.4374	0.969341	-0.0449235	0.979169	1
ENSMUSG00000045210	Vcpip1	valosin containing protein (p97)/p47 complex interacting protein 1	598.564	619.571	0.96615	-0.0496816	0.852193	1
ENSMUSG00000046101	Mcmdc2	minichromosome maintenance domain containing 2	21.2299	28.3335	0.757832	-0.40005	0.595426	1
ENSMUSG00000025916	Ppp1r42	protein phosphatase 1, regulatory subunit 42	1.53017	2.47823	0.727429	-0.459121	1	1
ENSMUSG00000056763	Cspp1	centrosome and spindle pole associated protein 1	836.339	892.683	0.936953	-0.0939512	0.684652	1
ENSMUSG00000067851	Arfgef1	ADP-ribosylation factor guanine nucleotide-exchange factor 1(brefeldin A-inhibited)	2202.31	2499.31	0.881214	-0.182436	0.419623	1
ENSMUSG00000088153	Gm26348	predicted gene, 26348	3.61263	4.58343	0.826128	-0.275562	0.944548	1
ENSMUSG00000048960	Prex2	phosphatidylinositol-3,4,5-trisphosphate-dependent Rac exchange factor 2	1103.04	1181.42	0.933705	-0.0989614	0.717088	1
ENSMUSG00000016918	Sulf1	sulfatase 1	77.0152	95.2522	0.810529	-0.303064	0.616831	1
ENSMUSG00000025938	Slco5a1	solute carrier organic anion transporter family, member 5A1	4.79193	7.65792	0.668974	-0.579978	0.674873	1
ENSMUSG00000005886	Ncoa2	nuclear receptor coactivator 2	1699.79	1717.61	0.98963	-0.0150383	0.939535	1
ENSMUSG00000025935	Tram1	translocating chain-associating membrane protein 1	883.274	948.307	0.931494	-0.102382	0.733357	1
ENSMUSG00000082193	Rpl5-ps1	ribosomal protein L5, pseudogene 1	14.1744	20.6548	0.700739	-0.513051	0.555292	1
ENSMUSG00000025925	Terf1	telomeric repeat binding factor 1	115.382	179.814	0.643657	-0.635637	0.0813575	1
ENSMUSG00000067795	4930444P10Rik	RIKEN cDNA 4930444P10 gene	2.08246	4.20184	0.592571	-0.75494	0.60019	1
ENSMUSG00000043716	Rpl7	ribosomal protein L7	620.317	709.121	0.874946	-0.192734	0.455871	1
ENSMUSG00000025920	Stau2	staufen (RNA binding protein) homolog 2 (Drosophila)	249.529	262.597	0.950425	-0.0733561	0.824637	1
ENSMUSG00000089982	Gm7568	predicted gene 7568	4.93	6.05404	0.840652	-0.250419	0.87047	1
ENSMUSG00000025939	Ube2w	ubiquitin-conjugating enzyme E2W (putative)	214.358	242.155	0.885683	-0.175137	0.637972	1
ENSMUSG00000079658	Eloc	elongin C	165.991	167.374	0.991784	-0.011902	0.983747	1
ENSMUSG00000042686	Jph1	junctophilin 1	14.0996	21.7253	0.664442	-0.589784	0.694139	1
ENSMUSG00000067780	Pi15	peptidase inhibitor 15	41.8441	97.6981	0.434092	-1.20393	0.230448	1
ENSMUSG00000025776	Crispld1	cysteine-rich secretory protein LCCL domain containing 1	140.046	140.871	0.994185	-0.00841439	0.984164	1
ENSMUSG00000070175	Gm24162	predicted gene, 24162	5.52534	6.13145	0.915008	-0.128143	1	1
ENSMUSG00000041809	Efhc1	EF-hand domain (C-terminal) containing 1	5.93955	7.98332	0.772493	-0.372407	0.739466	1
ENSMUSG00000041779	Tram2	translocating chain-associating membrane protein 2	152.188	174.315	0.873786	-0.194648	0.462994	1
ENSMUSG00000025936	Gm4956	predicted gene 4956	3.33648	17.813	0.230505	-2.11713	0.0976083	1
ENSMUSG00000028033	Kcnq5	potassium voltage-gated channel, subfamily Q, member 5	10.2539	14.085	0.746033	-0.422688	0.804879	1
ENSMUSG00000082935	Gm7658	predicted gene 7658	205.243	258.609	0.794439	-0.331992	0.331956	1
ENSMUSG00000065405	Mir30a	microRNA 30a	0	4.17485	0.193242	-2.37152	0.199323	1
ENSMUSG00000065567	Mir30c-2	microRNA 30c-2	6.2157	8.67498	0.74581	-0.42312	0.697784	1
ENSMUSG00000026158	Ogfrl1	opioid growth factor receptor-like 1	202.724	224.258	0.904401	-0.144966	0.652022	1
ENSMUSG00000026155	Smap1	small ArfGAP 1	485.063	500.882	0.968481	-0.0462039	0.906848	1
ENSMUSG00000026141	Col19a1	collagen, type XIX, alpha 1	23.4821	74.4701	0.324394	-1.62418	0.112885	1
ENSMUSG00000067736	Gm10222	predicted gene 10222	79.7044	141.287	0.567194	-0.818085	0.519805	1
ENSMUSG00000033569	Adgrb3	adhesion G protein-coupled receptor B3	8.58567	9.34288	0.92679	-0.109686	0.981612	1
ENSMUSG00000086240	Gm7846	predicted gene 7846	8.20313	8.74973	0.943937	-0.0832368	0.997308	1
ENSMUSG00000081557	Gm5697	predicted gene 5697	12.1983	12.856	0.95253	-0.070164	0.994804	1
ENSMUSG00000026064	Ptp4a1	protein tyrosine phosphatase 4a1	230.38	271.457	0.849233	-0.235768	0.396846	1
ENSMUSG00000070960	Gm19680	predicted gene, 19680	11.9538	13.4374	0.897239	-0.156435	1	1
ENSMUSG00000026134	Prim2	DNA primase, p58 subunit	49.9725	60.5521	0.82812	-0.272088	0.636429	1
ENSMUSG00000004768	Rab23	RAB23, member RAS oncogene family	172.517	192.135	0.898423	-0.154533	0.663829	1
ENSMUSG00000042215	Bag2	BCL2-associated athanogene 2	151.137	155.592	0.971556	-0.0416314	1	1
ENSMUSG00000042197	Zfp451	zinc finger protein 451	594.9	681.1	0.873625	-0.194914	0.4477	1
ENSMUSG00000026131	Dst	dystonin	24638.3	25685.8	0.959223	-0.0600625	0.796588	1
ENSMUSG00000092852	Mir5103	microRNA 5103	1.42377	2.93457	0.61602	-0.698952	0.749406	1
ENSMUSG00000037509	Arhgef4	Rho guanine nucleotide exchange factor (GEF) 4	87.957	103.051	0.854938	-0.226108	0.476086	1
ENSMUSG00000037503	Fam168b	family with sequence similarity 168, member B	937.961	948.615	0.988781	-0.0162775	0.962605	1
ENSMUSG00000045216	Hs6st1	heparan sulfate 6-O-sulfotransferase 1	1449.5	1504.5	0.96347	-0.0536881	0.877473	1
ENSMUSG00000037470	Uggt1	UDP-glucose glycoprotein glucosyltransferase 1	1444.24	1539.43	0.938206	-0.092024	0.732564	1
ENSMUSG00000047180	Neurl3	neuralized E3 ubiquitin protein ligase 3	282.5	325.976	0.867036	-0.205836	0.576123	1
ENSMUSG00000037447	Arid5a	AT rich interactive domain 5A (MRF1-like)	646.604	1010.36	0.640332	-0.643107	0.0993823	1
ENSMUSG00000010453	Kansl3	KAT8 regulatory NSL complex subunit 3	1414.59	1503.65	0.940809	-0.0880256	0.67372	1
ENSMUSG00000037432	Fer1l5	fer-1-like 5 (C. elegans)	98.976	109.025	0.90867	-0.138172	0.705837	1
ENSMUSG00000001143	Lman2l	lectin, mannose-binding 2-like	348.304	350.434	0.993938	-0.00877159	0.980509	1
ENSMUSG00000087589	D430040D24Rik	RIKEN cDNA D430040D24 gene	3.96349	5.7764	0.732468	-0.449163	0.921717	1
ENSMUSG00000037351	Actr1b	ARP1 actin-related protein 1B, centractin beta	879.394	905.964	0.970704	-0.0428966	0.972152	1
ENSMUSG00000026116	Tmem131	transmembrane protein 131	1374.29	1530.59	0.89795	-0.155292	0.567845	1
ENSMUSG00000026113	Inpp4a	inositol polyphosphate-4-phosphatase, type I	407.933	432.577	0.94316	-0.0844253	0.678635	1
ENSMUSG00000086064	4930439A04Rik	RIKEN cDNA 4930439A04 gene	9.38243	13.87	0.698213	-0.51826	0.608524	1
ENSMUSG00000026111	Unc50	unc-50 homolog (C. elegans)	183.216	217.77	0.842056	-0.248011	0.613122	1
ENSMUSG00000060771	Tsga10	testis specific 10	116.349	184.527	0.632517	-0.660824	0.0648677	1
ENSMUSG00000037138	Aff3	AF4/FMR2 family, member 3	45.5948	120.711	0.382831	-1.38522	0.0994838	1
ENSMUSG00000087131	Gm16152	predicted gene 16152	2.5714	7.96211	0.3985	-1.32735	0.407097	1
ENSMUSG00000048814	Lonrf2	LON peptidase N-terminal domain and ring finger 2	5.17447	12.6887	0.451064	-1.1486	0.26221	1
ENSMUSG00000026080	Chst10	carbohydrate sulfotransferase 10	5.73813	10.9385	0.564402	-0.825206	0.589814	1
ENSMUSG00000092563	Gm3617	predicted gene 3617	6.29042	13.095	0.517233	-0.951115	0.457647	1
ENSMUSG00000003134	Tbc1d8	TBC1 domain family, member 8	265.245	284.207	0.933516	-0.0992538	0.844366	1
ENSMUSG00000085894	Gm15832	predicted gene 15832	15.8743	18.9809	0.844518	-0.243799	0.746429	1
ENSMUSG00000064936	Gm23722	predicted gene, 23722	2.95394	6.87086	0.502351	-0.993231	0.515982	1
ENSMUSG00000050967	Creg2	cellular repressor of E1A-stimulated genes 2	2.84754	9.46204	0.367762	-1.44316	0.250007	1
ENSMUSG00000026074	Map4k4	mitogen-activated protein kinase kinase kinase kinase 4	1528.61	1556.16	0.982303	-0.0257606	0.854146	1
ENSMUSG00000026073	Il1r2	interleukin 1 receptor, type II	54.3388	86.1189	0.63521	-0.654694	0.119626	1
ENSMUSG00000026072	Il1r1	interleukin 1 receptor, type I	131.044	181.568	0.723256	-0.467421	0.154799	1
ENSMUSG00000026069	Il1rl1	interleukin 1 receptor-like 1	89.7114	97.609	0.919909	-0.120437	0.845065	1
ENSMUSG00000026070	Il18r1	interleukin 18 receptor 1	59.3322	98.4611	0.606591	-0.721204	0.421755	1
ENSMUSG00000026068	Il18rap	interleukin 18 receptor accessory protein	81.7755	125.248	0.65566	-0.60898	0.339904	1
ENSMUSG00000026062	Slc9a2	solute carrier family 9 (sodium/hydrogen exchanger), member 2	337.772	354.708	0.952387	-0.0703804	0.883347	1
ENSMUSG00000041945	Mfsd9	major facilitator superfamily domain containing 9	126.284	155.198	0.814884	-0.295333	0.539194	1
ENSMUSG00000079588	Tmem182	transmembrane protein 182	13.9616	25.6547	0.561311	-0.833128	0.322453	1
ENSMUSG00000060424	Pantr1	POU domain, class 3, transcription factor 3 adjacent noncoding transcript 1	71.2227	74.0527	0.962293	-0.0554524	1	1
ENSMUSG00000093436	Gm20646	predicted gene 20646	4.62218	12.4802	0.417068	-1.26164	0.335125	1
ENSMUSG00000077448	Gm23126	predicted gene, 23126	1.04123	3.5637	0.447275	-1.16077	0.503399	1
ENSMUSG00000070939	Tgfbrap1	transforming growth factor, beta receptor associated protein 1	805.064	825.052	0.975803	-0.0353377	0.967738	1
ENSMUSG00000008136	Fhl2	four and a half LIM domains 2	75.2495	114.51	0.660112	-0.599218	0.121164	1
ENSMUSG00000066877	Nck2	non-catalytic region of tyrosine kinase adaptor protein 2	185.296	225.515	0.822447	-0.282006	0.413699	1
ENSMUSG00000026051	1500015O10Rik	RIKEN cDNA 1500015O10 gene	2.70947	3.87377	0.761108	-0.393827	0.842112	1
ENSMUSG00000090243	Gm16103	predicted gene 16103	1.94438	2.26945	0.900576	-0.151081	1	1
ENSMUSG00000041763	Tpp2	tripeptidyl peptidase II	680.564	703.827	0.966995	-0.0484198	0.855102	1
ENSMUSG00000047343	Mettl21c	methyltransferase like 21C	22.4295	47.4095	0.483985	-1.04697	0.191574	1
ENSMUSG00000091844	Gm8251	predicted gene 8251	3.61263	6.5518	0.610798	-0.711232	0.628429	1
ENSMUSG00000056870	Gulp1	GULP, engulfment adaptor PTB domain containing 1	39.0802	54.8761	0.717305	-0.479341	0.399277	1
ENSMUSG00000026043	Col3a1	collagen, type III, alpha 1	1001.87	2064.63	0.485506	-1.04244	0.137623	1
ENSMUSG00000026042	Col5a2	collagen, type V, alpha 2	522.545	682.633	0.765828	-0.384908	0.724538	1
ENSMUSG00000025995	Wdr75	WD repeat domain 75	123.905	124.762	0.993186	-0.00986444	0.953234	1
ENSMUSG00000041144	Dnah7b	dynein, axonemal, heavy chain 7B	332.439	427.526	0.778105	-0.361963	0.25726	1
ENSMUSG00000025986	Slc39a10	solute carrier family 39 (zinc transporter), member 10	403.385	456.765	0.883391	-0.178876	0.554375	1
ENSMUSG00000081185	Gm4852	predicted pseudogene 4852	3.06034	9.06602	0.403371	-1.30982	0.371321	1
ENSMUSG00000045954	Cavin2	caveolae associated 2	1199.92	1322.07	0.90767	-0.13976	0.60369	1
ENSMUSG00000026107	Nabp1	nucleic acid binding protein 1	1656.6	1869.24	0.886302	-0.17413	0.490094	1
ENSMUSG00000018417	Myo1b	myosin IB	219.141	270.607	0.810513	-0.303092	0.340579	1
ENSMUSG00000072324	Gm8420	predicted gene 8420	4.20796	6.15222	0.728161	-0.457671	0.839279	1
ENSMUSG00000062939	Stat4	signal transducer and activator of transcription 4	36.9888	65.6875	0.569654	-0.811842	0.659684	1
ENSMUSG00000026103	Gls	glutaminase	2803.95	3178.57	0.88218	-0.180854	0.433864	1
ENSMUSG00000002881	Nab1	Ngfi-A binding protein 1	914.525	969.589	0.943267	-0.0842615	0.75742	1
ENSMUSG00000043015	Nemp2	nuclear envelope integral membrane protein 2	46.7944	57.1136	0.82243	-0.282036	0.535587	1
ENSMUSG00000041439	Mfsd6	major facilitator superfamily domain containing 6	549.328	575.316	0.954906	-0.0665693	0.839418	1
ENSMUSG00000041426	Hibch	3-hydroxyisobutyryl-Coenzyme A hydrolase	356.951	357.552	0.998322	-0.00242358	0.963257	1
ENSMUSG00000026098	Pms1	postmeiotic segregation increased 1 (S. cerevisiae)	95.9181	103.152	0.930546	-0.103851	0.937371	1
ENSMUSG00000026096	Osgepl1	O-sialoglycoprotein endopeptidase-like 1	102.439	130.187	0.788487	-0.342842	0.349144	1
ENSMUSG00000026094	Stk17b	serine/threonine kinase 17b (apoptosis-inducing)	445.445	501.316	0.888773	-0.170113	0.830134	1
ENSMUSG00000042807	Hecw2	HECT, C2 and WW domain containing E3 ubiquitin protein ligase 2	841.944	1033.77	0.814619	-0.295802	0.45906	1
ENSMUSG00000025983	Ccdc150	coiled-coil domain containing 150	2.5714	15.206	0.220375	-2.18197	0.049041	1
ENSMUSG00000052331	Ankrd44	ankyrin repeat domain 44	676.983	795.212	0.851511	-0.231904	0.472458	1
ENSMUSG00000025982	Sf3b1	splicing factor 3b, subunit 1	2860.93	3137.4	0.911908	-0.133039	0.557962	1
ENSMUSG00000089670	Gm16581	predicted gene 16581	89.3491	93.0193	0.960963	-0.0574465	0.8631	1
ENSMUSG00000025979	Mob4	MOB family member 4, phocein	222.064	239.485	0.927557	-0.108492	0.783241	1
ENSMUSG00000025978	Rftn2	raftlin family member 2	39.8883	42.6924	0.935823	-0.095692	0.835693	1
ENSMUSG00000025977	Boll	bol, boule-like (Drosophila)	2.29525	3.08038	0.807585	-0.308315	1	1
ENSMUSG00000038349	Plcl1	phospholipase C-like 1	537.731	587.468	0.915481	-0.127398	0.598422	1
ENSMUSG00000087022	9130024F11Rik	RIKEN cDNA 9130024F11 gene	3.82542	4.53889	0.871189	-0.198943	1	1
ENSMUSG00000038323	1700066M21Rik	RIKEN cDNA 1700066M21 gene	50.5995	62.7826	0.80899	-0.305807	0.663511	1
ENSMUSG00000048495	Tyw5	tRNA-yW synthesizing protein 5	53.988	61.2563	0.883252	-0.179104	0.699909	1
ENSMUSG00000025971	Maip1	matrix AAA peptidase interacting protein 1	77.3319	94.4554	0.820613	-0.285226	0.483411	1
ENSMUSG00000054770	Kctd18	potassium channel tetramerisation domain containing 18	109.04	135.438	0.806517	-0.310222	0.482239	1
ENSMUSG00000026039	Sgo2a	shugoshin 2A	2.05078	7.15395	0.374148	-1.41832	0.342113	1
ENSMUSG00000063558	Aox1	aldehyde oxidase 1	16.4379	35.1301	0.482644	-1.05097	0.135885	1
ENSMUSG00000026034	Clk1	CDC-like kinase 1	3265.81	3735.9	0.874203	-0.193959	0.37809	1
ENSMUSG00000059647	Cbx3-ps7	chromobox 3, pseudogene 7	34.0868	49.8155	0.690475	-0.534339	0.401351	1
ENSMUSG00000026031	Cflar	CASP8 and FADD-like apoptosis regulator	1574.02	1829.81	0.860285	-0.217114	0.340121	1
ENSMUSG00000026028	Trak2	trafficking protein, kinesin binding 2	2891.93	3093.67	0.934811	-0.0972537	0.648736	1
ENSMUSG00000038079	Tmem237	transmembrane protein 237	149.53	174.061	0.859874	-0.217803	0.56331	1
ENSMUSG00000026023	Cdk15	cyclin-dependent kinase 15	2.6778	6.10446	0.517674	-0.949884	0.648541	1
ENSMUSG00000041075	Fzd7	frizzled class receptor 7	489.101	565.894	0.864538	-0.209999	0.429631	1
ENSMUSG00000047361	Gm973	predicted gene 973	8.09673	23.1026	0.377417	-1.40577	0.0832496	1
ENSMUSG00000026020	Nop58	NOP58 ribonucleoprotein	596.83	726.891	0.821318	-0.283986	0.330415	1
ENSMUSG00000089512	Gm26287	predicted gene, 26287	1.04123	5.34394	0.32176	-1.63594	0.298571	1
ENSMUSG00000041040	Fam117b	family with sequence similarity 117, member B	1487.69	1694.04	0.878261	-0.187279	0.404686	1
ENSMUSG00000026018	Ica1l	islet cell autoantigen 1-like	94.8972	127.123	0.74848	-0.417963	0.471699	1
ENSMUSG00000073664	Nbeal1	neurobeachin like 1	1377.13	1527.37	0.901701	-0.14928	0.519415	1
ENSMUSG00000026014	Raph1	Ras association (RalGDS/AF-6) and pleckstrin homology domains 1	210.832	237.766	0.887194	-0.172678	0.584496	1
ENSMUSG00000082160	Gm11578	predicted gene 11578	1.66824	7.82806	0.302245	-1.72621	0.222669	1
ENSMUSG00000026012	Cd28	CD28 antigen	35.4586	39.3356	0.903882	-0.145794	1	1
ENSMUSG00000026011	Ctla4	cytotoxic T-lymphocyte-associated protein 4	7.82059	12.6409	0.646627	-0.628995	0.724959	1
ENSMUSG00000081382	Rpl18-ps1	ribosomal protein L18, pseudogene 1	222.093	229.132	0.969414	-0.0448157	0.85432	1
ENSMUSG00000026009	Icos	inducible T cell co-stimulator	48.422	53.9445	0.89949	-0.152821	1	1
ENSMUSG00000052062	Pard3b	par-3 family cell polarity regulator beta	634.526	647.649	0.979768	-0.0294876	0.940389	1
ENSMUSG00000085842	Pard3bos1	par-3 family cell polarity regulator beta, opposite strand 1	11.7841	11.9078	0.990412	-0.0138997	0.891021	1
ENSMUSG00000085400	Pard3bos3	par-3 family cell polarity regulator beta, opposite strand 3	0.765084	6.92717	0.222663	-2.16707	0.315401	1
ENSMUSG00000040865	Ino80d	INO80 complex subunit D	1537.67	1735.9	0.885867	-0.174837	0.522428	1
ENSMUSG00000084799	Ino80dos	INO80 complex subunit D, opposite strand	12.368	13.8371	0.900986	-0.150423	0.903858	1
ENSMUSG00000064602	Snora41	small nucleolar RNA, H/ACA box 41	26.0104	26.9825	0.965262	-0.0510082	0.91717	1
ENSMUSG00000046856	Gpr1	G protein-coupled receptor 1	3.61263	6.56079	0.610072	-0.71295	0.628346	1
ENSMUSG00000027520	Zdbf2	zinc finger, DBF-type containing 2	6.39682	8.86578	0.749745	-0.415528	0.871618	1
ENSMUSG00000025964	Adam23	a disintegrin and metallopeptidase domain 23	40.5901	42.458	0.957017	-0.0633833	0.98723	1
ENSMUSG00000025962	Fastkd2	FAST kinase domains 2	148.672	152.71	0.97373	-0.0384065	0.957293	1
ENSMUSG00000025959	Klf7	Kruppel-like factor 7 (ubiquitous)	492.567	508.812	0.968136	-0.0467183	0.815754	1
ENSMUSG00000025958	Creb1	cAMP responsive element binding protein 1	706.108	741.672	0.952113	-0.0707948	0.851767	1
ENSMUSG00000070871	Ccnyl1	cyclin Y-like 1	235.418	267.264	0.88129	-0.18231	0.514535	1
ENSMUSG00000045005	Fzd5	frizzled class receptor 5	468.795	490.837	0.955185	-0.0661482	0.828813	1
ENSMUSG00000025949	Pikfyve	phosphoinositide kinase, FYVE type zinc finger containing	808.249	929.526	0.869668	-0.201464	0.441431	1
ENSMUSG00000015222	Map2	microtubule-associated protein 2	243.972	337.28	0.72417	-0.465599	0.273124	1
ENSMUSG00000073656	Gm10558	predicted gene 10558	5.41894	6.11934	0.901619	-0.149409	0.952987	1
ENSMUSG00000082057	Gm15789	predicted gene 15789	29.9106	30.5728	0.979024	-0.0305842	0.938328	1
ENSMUSG00000026003	Acadl	acyl-Coenzyme A dehydrogenase, long-chain	2090.71	2104.2	0.993592	-0.00927414	0.937369	1
ENSMUSG00000082769	Gm15793	predicted gene 15793	21.506	33.0958	0.660081	-0.599285	0.610116	1
ENSMUSG00000026196	Bard1	BRCA1 associated RING domain 1	20.4217	24.6529	0.835059	-0.26005	0.653882	1
ENSMUSG00000026193	Fn1	fibronectin 1	778.841	955.507	0.8153	-0.294596	0.402723	1
ENSMUSG00000039395	Mreg	melanoregulin	48.2295	64.0174	0.757175	-0.401301	0.52804	1
ENSMUSG00000026189	Pecr	peroxisomal trans-2-enoyl-CoA reductase	1041.1	1364.52	0.763155	-0.389952	0.34058	1
ENSMUSG00000026188	Tmem169	transmembrane protein 169	39.2296	71.4301	0.555427	-0.848331	0.266311	1
ENSMUSG00000039354	Smarcal1	SWI/SNF related matrix associated, actin dependent regulator of chromatin, subfamily a-like 1	368.015	394.776	0.932383	-0.101006	0.767504	1
ENSMUSG00000055322	Tns1	tensin 1	22007.3	25958.8	0.847784	-0.238232	0.492533	1
ENSMUSG00000006304	Arpc2	actin related protein 2/3 complex, subunit 2	1720.11	1809.28	0.950746	-0.0728678	0.801647	1
ENSMUSG00000064272	Gpbar1	G protein-coupled bile acid receptor 1	10.8062	19.3278	0.580791	-0.783908	0.373454	1
ENSMUSG00000026179	Pnkd	paroxysmal nonkinesiogenic dyskinesia	363.252	392.478	0.925724	-0.111345	0.758316	1
ENSMUSG00000006301	Tmbim1	transmembrane BAX inhibitor motif containing 1	525.558	529.351	0.992848	-0.0103545	0.888017	1
ENSMUSG00000073650	Catip	ciliogenesis associated TTC17 interacting protein	1.04123	4.55689	0.367333	-1.44484	0.354271	1
ENSMUSG00000033364	Usp37	ubiquitin specific peptidase 37	359.438	388.605	0.925137	-0.112261	0.663624	1
ENSMUSG00000026173	Plcd4	phospholipase C, delta 4	65.3667	65.494	0.998086	-0.00276341	0.947081	1
ENSMUSG00000026135	Zfp142	zinc finger protein 142	421.045	437.579	0.962301	-0.0554397	0.843353	1
ENSMUSG00000033257	Ttll4	tubulin tyrosine ligase-like family, member 4	693.93	824.035	0.842304	-0.247587	0.517445	1
ENSMUSG00000006542	Prkag3	protein kinase, AMP-activated, gamma 3 non-catatlytic subunit	63.4654	84.1291	0.757266	-0.401128	0.639557	1
ENSMUSG00000026167	Wnt10a	wingless-type MMTV integration site family, member 10A	0.765084	3.22076	0.418191	-1.25777	0.624209	1
ENSMUSG00000026203	Dnajb2	DnaJ heat shock protein family (Hsp40) member B2	159.171	181.236	0.878918	-0.186199	0.683759	1
ENSMUSG00000026204	Ptprn	protein tyrosine phosphatase, receptor type, N	8.02201	14.8236	0.57016	-0.810561	0.477781	1
ENSMUSG00000026207	Speg	SPEG complex locus	222.656	296.497	0.751794	-0.411591	0.320925	1
ENSMUSG00000033007	Asic4	acid-sensing (proton-gated) ion channel family member 4	1.80631	5.34983	0.441951	-1.17804	0.453475	1
ENSMUSG00000026211	Obsl1	obscurin-like 1	41.4185	66.2573	0.63069	-0.664997	0.193731	1
ENSMUSG00000051703	Tmem198	transmembrane protein 198	5.63173	17.9498	0.349964	-1.51472	0.136706	1
ENSMUSG00000032968	Inha	inhibin alpha	0.903156	12.0425	0.14592	-2.77675	0.158987	1
ENSMUSG00000006576	Slc4a3	solute carrier family 4 (anion exchanger), member 3	310.57	449.153	0.692143	-0.530858	0.0807811	1
ENSMUSG00000026245	Farsb	phenylalanyl-tRNA synthetase, beta subunit	195.933	221.203	0.886274	-0.174175	0.591677	1
ENSMUSG00000090486	BC035947	cDNA sequence BC035947	117.007	182.168	0.644259	-0.634288	0.245888	1
ENSMUSG00000047330	Kcne4	potassium voltage-gated channel, Isk-related subfamily, gene 4	13.8349	26.6422	0.536675	-0.89788	0.527641	1
ENSMUSG00000072978	Gm5830	predicted pseudogene 5830	47.505	54.2971	0.877171	-0.18907	0.714851	1
ENSMUSG00000054702	Ap1s3	adaptor-related protein complex AP-1, sigma 3	64.8372	70.4545	0.921386	-0.118123	0.951732	1
ENSMUSG00000073643	Wdfy1	WD repeat and FYVE domain containing 1	373.124	399.732	0.9336	-0.0991232	0.725908	1
ENSMUSG00000026249	Serpine2	serine (or cysteine) peptidase inhibitor, clade E, member 2	173.261	289.871	0.599102	-0.739127	0.100574	1
ENSMUSG00000067106	Gm5529	predicted pseudogene 5529	168.041	172.829	0.97246	-0.040289	0.950999	1
ENSMUSG00000043230	Fam124b	family with sequence similarity 124, member B	5.41894	6.51892	0.853704	-0.228192	0.955761	1
ENSMUSG00000004364	Cul3	cullin 3	1696.16	1822.57	0.930683	-0.103638	0.661484	1
ENSMUSG00000038608	Dock10	dedicator of cytokinesis 10	851.662	1115.38	0.763772	-0.388786	0.495115	1
ENSMUSG00000055980	Irs1	insulin receptor substrate 1	591.482	706.367	0.837588	-0.255687	0.606318	1
ENSMUSG00000026142	Rhbdd1	rhomboid domain containing 1	151.072	218.664	0.692291	-0.53055	0.0927448	1
ENSMUSG00000067158	Col4a4	collagen, type IV, alpha 4	5349.3	6596.27	0.810987	-0.30225	0.450327	1
ENSMUSG00000079465	Col4a3	collagen, type IV, alpha 3	4464.66	5540.91	0.805799	-0.311509	0.513634	1
ENSMUSG00000026159	Agfg1	ArfGAP with FG repeats 1	388.607	457.731	0.849314	-0.235629	0.382196	1
ENSMUSG00000053161	Daw1	dynein assembly factor with WDR repeat domains 1	3.36815	3.76349	0.917006	-0.124996	0.989676	1
ENSMUSG00000026163	Sphkap	SPHK1 interactor, AKAP domain containing	1.53017	4.92093	0.427326	-1.22659	0.766221	1
ENSMUSG00000045658	Pid1	phosphotyrosine interaction domain containing 1	326.735	375.073	0.871466	-0.198484	0.638847	1
ENSMUSG00000036766	Dner	delta/notch-like EGF repeat containing	0.765084	6.35778	0.239894	-2.05953	0.440374	1
ENSMUSG00000026219	Trip12	thyroid hormone receptor interactor 12	4220.94	4439.6	0.950759	-0.0728483	0.744373	1
ENSMUSG00000073633	Fbxo36	F-box protein 36	67.9495	135.358	0.505649	-0.983791	0.0278444	1
ENSMUSG00000026220	Slc16a14	solute carrier family 16 (monocarboxylic acid transporters), member 14	236.403	585.249	0.404952	-1.30418	0.399775	1
ENSMUSG00000052477	C130026I21Rik	RIKEN cDNA C130026I21 gene	5.41894	11.2599	0.52357	-0.933545	0.583354	1
ENSMUSG00000072109	A530040E14Rik	RIKEN cDNA A530040E14 gene	14.9394	23.0454	0.66289	-0.59316	0.44966	1
ENSMUSG00000079455	Gm16026	predicted pseudogene 16026	4.59051	5.20945	0.900322	-0.151487	1	1
ENSMUSG00000070034	Sp110	Sp110 nuclear body protein	221.701	239.9	0.924455	-0.113326	0.792877	1
ENSMUSG00000070031	Sp140	Sp140 nuclear body protein	77.2686	97.5922	0.793862	-0.333039	0.392066	1
ENSMUSG00000052760	A630001G21Rik	RIKEN cDNA A630001G21 gene	89.021	106.372	0.838406	-0.25428	0.576646	1
ENSMUSG00000036707	Cab39	calcium binding protein 39	1389	1472.1	0.943592	-0.0837649	0.789087	1
ENSMUSG00000026223	Itm2c	integral membrane protein 2C	510.164	540.381	0.944185	-0.0828588	0.879225	1
ENSMUSG00000026229	Psmd1	proteasome (prosome, macropain) 26S subunit, non-ATPase, 1	1187.59	1200.44	0.989308	-0.0155087	0.988401	1
ENSMUSG00000077274	Gm22786	predicted gene, 22786	18.7218	22.1425	0.85219	-0.230753	0.829571	1
ENSMUSG00000062590	Armc9	armadillo repeat containing 9	127.814	142.179	0.89967	-0.152532	0.674181	1
ENSMUSG00000079445	B3gnt7	UDP-GlcNAc:betaGal beta-1,3-N-acetylglucosaminyltransferase 7	37.3169	50.156	0.749021	-0.416922	0.536747	1
ENSMUSG00000064837	Snora75	small nucleolar RNA, H/ACA box 75	9.06324	14.9825	0.629643	-0.667395	0.383193	1
ENSMUSG00000064696	Gm24148	predicted gene, 24148	2.81587	5.67789	0.571418	-0.807382	0.652301	1
ENSMUSG00000026239	Pde6d	phosphodiesterase 6D, cGMP-specific, rod, delta	95.6826	104.524	0.91621	-0.126249	0.753465	1
ENSMUSG00000026240	Cops7b	COP9 signalosome subunit 7B	71.4557	83.2314	0.860198	-0.217259	0.596711	1
ENSMUSG00000079436	Kcnj13	potassium inwardly-rectifying channel, subfamily J, member 13	11.8474	13.3476	0.895442	-0.159328	0.878271	1
ENSMUSG00000026258	3110079O15Rik	RIKEN cDNA 3110079O15 gene	4.68553	5.25754	0.908588	-0.138302	0.906175	1
ENSMUSG00000026288	Inpp5d	inositol polyphosphate-5-phosphatase D	819.848	837.508	0.978938	-0.0307101	0.92321	1
ENSMUSG00000026289	Atg16l1	autophagy related 16-like 1 (S. cerevisiae)	450.288	462.132	0.974428	-0.0373725	0.927764	1
ENSMUSG00000087968	Gm25395	predicted gene, 25395	234.708	272.87	0.860657	-0.21649	0.589754	1
ENSMUSG00000056055	Sag	S-antigen, retina and pineal gland (arrestin)	8.83014	17.0489	0.54464	-0.876626	0.406269	1
ENSMUSG00000070738	Dgkd	diacylglycerol kinase, delta	1035.66	1209.67	0.856268	-0.223866	0.36441	1
ENSMUSG00000090124	Ugt1a7c	UDP glucuronosyltransferase 1 family, polypeptide A7C	763.308	789.006	0.967471	-0.0477102	0.952134	1
ENSMUSG00000082837	Gm15373	predicted gene 15373	6.24737	16.7001	0.409455	-1.28822	0.136009	1
ENSMUSG00000090145	Ugt1a6b	UDP glucuronosyltransferase 1 family, polypeptide A6B	6.25875	10.8553	0.612281	-0.707734	0.676437	1
ENSMUSG00000079429	Mroh2a	maestro heat-like repeat family member 2A	37.9756	53.6843	0.712738	-0.488555	0.358978	1
ENSMUSG00000044783	Hjurp	Holliday junction recognition protein	335.902	367.849	0.913388	-0.1307	0.627252	1
ENSMUSG00000036206	Sh3bp4	SH3-domain binding protein 4	604.692	666.236	0.907762	-0.139614	0.549658	1
ENSMUSG00000088775	Gm26037	predicted gene, 26037	6.29042	7.62239	0.845522	-0.242085	0.945197	1
ENSMUSG00000048126	Col6a3	collagen, type VI, alpha 3	308.47	496.085	0.62257	-0.683691	0.016689	1
ENSMUSG00000026303	Mlph	melanophilin	169.252	176.258	0.96048	-0.0581723	0.91673	1
ENSMUSG00000026305	Lrrfip1	leucine rich repeat (in FLII) interacting protein 1	2027.87	2285.76	0.887225	-0.172628	0.423161	1
ENSMUSG00000070732	Rbm44	RNA binding motif protein 44	3.12368	4.98889	0.688555	-0.538355	0.717993	1
ENSMUSG00000034353	Ramp1	receptor (calcitonin) activity modifying protein 1	41.5566	48.8076	0.85442	-0.226983	0.714178	1
ENSMUSG00000034343	Ube2f	ubiquitin-conjugating enzyme E2F (putative)	152.987	196.505	0.779662	-0.359079	0.2815	1
ENSMUSG00000090322	Gm17090	predicted gene 17090	1.04123	6.05993	0.289129	-1.79022	0.21244	1
ENSMUSG00000026308	Klhl30	kelch-like 30	8.2348	15.8379	0.548453	-0.866561	0.361824	1
ENSMUSG00000047443	Erfe	erythroferrone	16.4266	23.9044	0.699738	-0.515114	0.460229	1
ENSMUSG00000026309	Ilkap	integrin-linked kinase-associated serine/threonine phosphatase 2C	421.439	432.168	0.975232	-0.0361826	0.948342	1
ENSMUSG00000067071	Hes6	hairy and enhancer of split 6	250.324	260.232	0.962069	-0.0557874	0.764978	1
ENSMUSG00000055866	Per2	period circadian clock 2	576.427	689.855	0.835814	-0.258746	0.586962	1
ENSMUSG00000034292	Traf3ip1	TRAF3 interacting protein 1	325.702	377.52	0.863104	-0.212394	0.671404	1
ENSMUSG00000026311	Asb1	ankyrin repeat and SOCS box-containing 1	171.251	198.661	0.86272	-0.213036	0.528693	1
ENSMUSG00000034212	Ankmy1	ankyrin repeat and MYND domain containing 1	2.29525	2.88959	0.847199	-0.239228	1	1
ENSMUSG00000026271	Gpr35	G protein-coupled receptor 35	103.684	116.993	0.887211	-0.172651	0.791547	1
ENSMUSG00000014602	Kif1a	kinesin family member 1A	25.3314	48.8674	0.528028	-0.921312	0.119181	1
ENSMUSG00000047793	Sned1	sushi, nidogen and EGF-like domains 1	384.097	491.011	0.7827	-0.353469	0.164129	1
ENSMUSG00000034107	Ano7	anoctamin 7	16.8408	22.0855	0.772812	-0.371811	0.500762	1
ENSMUSG00000034088	Hdlbp	high density lipoprotein (HDL) binding protein	5200.35	5626.59	0.924258	-0.113632	0.623761	1
ENSMUSG00000090489	Gm17415	predicted gene, 17415	17.8934	19.7505	0.910504	-0.135262	0.836663	1
ENSMUSG00000026276	Sept2	septin 2	880.443	924.097	0.952811	-0.0697384	0.858758	1
ENSMUSG00000026277	Stk25	serine/threonine kinase 25 (yeast)	854.108	860.481	0.992602	-0.0107128	0.975445	1
ENSMUSG00000026279	Thap4	THAP domain containing 4	417.838	420.139	0.994536	-0.00790456	0.862069	1
ENSMUSG00000026280	Atg4b	autophagy related 4B, cysteine peptidase	286.378	305.195	0.938543	-0.0915048	0.810036	1
ENSMUSG00000026281	Dtymk	deoxythymidylate kinase	127.483	129.465	0.984805	-0.0220895	0.848785	1
ENSMUSG00000026283	Ing5	inhibitor of growth family, member 5	282.923	289.65	0.976856	-0.0337828	0.91801	1
ENSMUSG00000051185	Fam174a	family with sequence similarity 174, member A	209.175	244.383	0.856518	-0.223445	0.492444	1
ENSMUSG00000040693	Slco4c1	solute carrier organic anion transporter family, member 4C1	4.86665	13.6851	0.399497	-1.32374	0.297131	1
ENSMUSG00000044768	D1Ertd622e	DNA segment, Chr 1, ERATO Doi 622, expressed	286.018	348.733	0.820677	-0.285114	0.396452	1
ENSMUSG00000026333	Gin1	gypsy retrotransposon integrase 1	81.8364	84.6435	0.967223	-0.0480802	0.850941	1
ENSMUSG00000026335	Pam	peptidylglycine alpha-amidating monooxygenase	2085.41	2388.59	0.873124	-0.195741	0.541371	1
ENSMUSG00000089706	B230216N24Rik	RIKEN cDNA B230216N24 gene	76.5035	94.6434	0.810338	-0.303404	0.605525	1
ENSMUSG00000089791	Gm3555	predicted pseudogene 3555	179.912	214.531	0.839377	-0.25261	0.408006	1
ENSMUSG00000050840	Cdh20	cadherin 20	1.53017	6.46217	0.339066	-1.56036	0.65171	1
ENSMUSG00000047496	Rnf152	ring finger protein 152	451.789	489.508	0.923103	-0.115436	0.804555	1
ENSMUSG00000056536	Pign	phosphatidylinositol glycan anchor biosynthesis, class N	174.246	176.035	0.989891	-0.0146578	0.997435	1
ENSMUSG00000026319	2310035C23Rik	RIKEN cDNA 2310035C23 gene	491.417	538.59	0.912576	-0.131984	0.583616	1
ENSMUSG00000057329	Bcl2	B cell leukemia/lymphoma 2	379.851	415.688	0.913996	-0.129741	0.668953	1
ENSMUSG00000009905	Kdsr	3-ketodihydrosphingosine reductase	260.802	338.497	0.771146	-0.374923	0.335422	1
ENSMUSG00000067006	Serpinb5	serine (or cysteine) peptidase inhibitor, clade B, member 5	1.14763	2.88059	0.553428	-0.853533	0.762809	1
ENSMUSG00000026315	Serpinb8	serine (or cysteine) peptidase inhibitor, clade B, member 8	163.718	181.757	0.901298	-0.149923	0.658719	1
ENSMUSG00000047216	Cdh19	cadherin 19, type 2	7.82059	8.71329	0.908095	-0.139085	1	1
ENSMUSG00000038702	Dsel	dermatan sulfate epimerase-like	68.6626	89.9949	0.765566	-0.385401	0.37889	1
ENSMUSG00000070695	Cntnap5a	contactin associated protein-like 5A	0	20.7269	0.0460259	-4.44141	0.044423	1
ENSMUSG00000026374	Tsn	translin	279.282	282.46	0.988788	-0.0162675	0.997176	1
ENSMUSG00000026377	Nifk	nucleolar protein interacting with the FHA domain of MKI67	197.604	226.539	0.872834	-0.196221	0.640795	1
ENSMUSG00000064302	Clasp1	CLIP associating protein 1	892.046	987.211	0.9037	-0.146085	0.596123	1
ENSMUSG00000080542	Gm22710	predicted gene, 22710	36.2757	40.2169	0.904379	-0.145	1	1
ENSMUSG00000026380	Tfcp2l1	transcription factor CP2-like 1	6927.86	7696.44	0.900151	-0.151761	0.576648	1
ENSMUSG00000089601	Gm22094	predicted gene, 22094	1.53017	2.92557	0.644535	-0.633669	0.858268	1
ENSMUSG00000048402	Gli2	GLI-Kruppel family member GLI2	4.89832	14.1711	0.388787	-1.36295	0.168579	1
ENSMUSG00000036975	Tmem177	transmembrane protein 177	56.2515	65.7351	0.857893	-0.221131	0.765715	1
ENSMUSG00000026387	Sctr	secretin receptor	7.71419	15.09	0.541592	-0.884722	0.368379	1
ENSMUSG00000026341	Actr3	ARP3 actin-related protein 3	821.683	890.679	0.922622	-0.116188	0.666901	1
ENSMUSG00000026343	Gpr39	G protein-coupled receptor 39	32.6314	52.2474	0.631607	-0.662901	0.258683	1
ENSMUSG00000026344	Lypd1	Ly6/Plaur domain containing 1	1.91271	4.48492	0.53104	-0.913107	0.735074	1
ENSMUSG00000036155	Mgat5	mannoside acetylglucosaminyltransferase 5	570.273	660.759	0.863264	-0.212127	0.452464	1
ENSMUSG00000026347	Tmem163	transmembrane protein 163	33.9171	39.7909	0.856003	-0.224313	0.798765	1
ENSMUSG00000026349	Ccnt2	cyclin T2	855.037	914.581	0.934965	-0.0970157	0.702312	1
ENSMUSG00000051590	Map3k19	mitogen-activated protein kinase kinase kinase 19	3.61263	5.00377	0.768288	-0.380282	0.829459	1
ENSMUSG00000036086	Zranb3	zinc finger, RAN-binding domain containing 3	31.5471	41.8534	0.759499	-0.39688	0.500872	1
ENSMUSG00000056211	R3hdm1	R3H domain containing 1	865.634	899.118	0.9628	-0.0546922	0.829351	1
ENSMUSG00000026353	Ubxn4	UBX domain protein 4	1622.36	1872.17	0.866637	-0.2065	0.381678	1
ENSMUSG00000045382	Cxcr4	chemokine (C-X-C motif) receptor 4	291.949	301.07	0.969803	-0.0442369	1	1
ENSMUSG00000087691	Gm15674	predicted gene 15674	5.20614	10.5295	0.538283	-0.893564	0.429417	1
ENSMUSG00000086825	Gm15675	predicted gene 15675	2.95394	8.43921	0.418885	-1.25537	0.344782	1
ENSMUSG00000026399	Cd55	CD55 molecule, decay accelerating factor for complement	96.2146	161.966	0.596534	-0.745324	0.188046	1
ENSMUSG00000085526	Gm16083	predicted gene 16083	0.520614	3.43543	0.342833	-1.54442	0.420505	1
ENSMUSG00000046404	Yod1	YOD1 deubiquitinase	61.2132	72.2365	0.849484	-0.235341	0.678637	1
ENSMUSG00000042510	AA986860	expressed sequence AA986860	358.268	396.8	0.903137	-0.146984	0.623816	1
ENSMUSG00000086706	Gm15848	predicted gene 15848	63.2526	98.6529	0.644764	-0.633157	0.121723	1
ENSMUSG00000042474	Fcmr	Fc fragment of IgM receptor	7.1619	25.2518	0.310909	-1.68544	0.336096	1
ENSMUSG00000016529	Il10	interleukin 10	6.2157	11.4273	0.580633	-0.784303	0.424046	1
ENSMUSG00000016528	Mapkapk2	MAP kinase-activated protein kinase 2	1325.97	1518.33	0.873395	-0.195294	0.407252	1
ENSMUSG00000042349	Ikbke	inhibitor of kappaB kinase epsilon	85.2906	95.5381	0.893851	-0.161894	0.71329	1
ENSMUSG00000026425	Srgap2	SLIT-ROBO Rho GTPase activating protein 2	971.8	1100.79	0.882923	-0.179641	0.445029	1
ENSMUSG00000055184	Fam72a	family with sequence similarity 72, member A	3.12368	4.84308	0.705738	-0.502795	0.719562	1
ENSMUSG00000052688	Rab7b	RAB7B, member RAS oncogene family	189.432	203.515	0.931139	-0.102932	0.83347	1
ENSMUSG00000013275	Slc41a1	solute carrier family 41, member 1	404.766	535.171	0.756785	-0.402044	0.129712	1
ENSMUSG00000026433	Rab29	RAB29, member RAS oncogene family	98.3718	109.02	0.903212	-0.146863	0.87075	1
ENSMUSG00000026434	Nucks1	nuclear casein kinase and cyclin-dependent kinase substrate 1	1315.24	1362.06	0.965651	-0.0504255	0.79342	1
ENSMUSG00000026435	Slc45a3	solute carrier family 45, member 3	219.967	248.158	0.886856	-0.173228	0.581958	1
ENSMUSG00000042115	Klhdc8a	kelch domain containing 8A	221.785	242.318	0.915614	-0.127188	0.685236	1
ENSMUSG00000009772	Nuak2	NUAK family, SNF1-like kinase, 2	947.531	1000.45	0.947155	-0.0783279	0.670985	1
ENSMUSG00000042046	Dstyk	dual serine/threonine and tyrosine protein kinase	554.588	583.268	0.950913	-0.0726141	0.793017	1
ENSMUSG00000026442	Nfasc	neurofascin	0.765084	3.84401	0.364385	-1.45646	0.544778	1
ENSMUSG00000026443	Lrrn2	leucine rich repeat protein 2, neuronal	1.80631	10.7266	0.239311	-2.06304	0.0830695	1
ENSMUSG00000054387	Mdm4	transformed mouse 3T3 cell double minute 4	584.433	759.88	0.769416	-0.378164	0.125277	1
ENSMUSG00000041757	Plekha6	pleckstrin homology domain containing, family A member 6	3265.17	3377.21	0.966836	-0.0486574	0.917792	1
ENSMUSG00000070645	Ren1	renin 1 structural	536.65	746.933	0.718849	-0.47624	0.505993	1
ENSMUSG00000070644	Etnk2	ethanolamine kinase 2	70.7971	152.212	0.468612	-1.09354	0.0725332	1
ENSMUSG00000070643	Sox13	SRY (sex determining region Y)-box 13	679.948	853.616	0.796789	-0.32773	0.284197	1
ENSMUSG00000051998	Lax1	lymphocyte transmembrane adaptor 1	18.4887	30.7444	0.613926	-0.703863	0.656327	1
ENSMUSG00000026463	Atp2b4	ATPase, Ca++ transporting, plasma membrane 4	1095.68	1359.69	0.80597	-0.311201	0.286402	1
ENSMUSG00000010311	Optc	opticin	13.5904	25.3419	0.553884	-0.852343	0.43274	1
ENSMUSG00000041577	Prelp	proline arginine-rich end leucine-rich repeat	92.1244	141.566	0.653204	-0.614395	0.350812	1
ENSMUSG00000020423	Btg2	B cell translocation gene 2, anti-proliferative	5358.24	5897.31	0.908606	-0.138273	0.691389	1
ENSMUSG00000026457	Adipor1	adiponectin receptor 1	1302.49	1468.1	0.887273	-0.172549	0.528435	1
ENSMUSG00000042207	Kdm5b	lysine (K)-specific demethylase 5B	620.792	704.295	0.881606	-0.181793	0.457334	1
ENSMUSG00000026452	Syt2	synaptotagmin II	7.1619	42.9497	0.18571	-2.42888	0.0413023	1
ENSMUSG00000073557	Ppp1r12b	protein phosphatase 1, regulatory (inhibitor) subunit 12B	709.778	1179.22	0.60224	-0.731589	0.0380478	1
ENSMUSG00000042793	Lgr6	leucine-rich repeat-containing G protein-coupled receptor 6	0.382542	3.54571	0.304142	-1.71718	0.384243	1
ENSMUSG00000031506	Ptpn7	protein tyrosine phosphatase, non-receptor type 7	35.4586	54.2524	0.659857	-0.599775	0.643301	1
ENSMUSG00000087721	Gm26280	predicted gene, 26280	6.59824	8.5526	0.795411	-0.330228	0.757502	1
ENSMUSG00000085311	Gm15445	predicted gene 15445	6.1093	6.79346	0.912213	-0.132557	0.856423	1
ENSMUSG00000026424	Gpr37l1	G protein-coupled receptor 37-like 1	3.12368	4.68782	0.725003	-0.463941	0.776103	1
ENSMUSG00000079139	Gm4204	predicted gene 4204	859.672	884.303	0.972178	-0.0407077	0.953647	1
ENSMUSG00000003051	Elf3	E74-like factor 3	483.913	546.95	0.884959	-0.176317	0.488026	1
ENSMUSG00000041926	Rnpep	arginyl aminopeptidase (aminopeptidase B)	278.897	290.215	0.961132	-0.0571929	0.869167	1
ENSMUSG00000048096	Lmod1	leiomodin 1 (smooth muscle)	256.202	530.864	0.483586	-1.04815	0.0945953	1
ENSMUSG00000041889	Shisa4	shisa family member 4	84.1544	96.4124	0.874163	-0.194025	0.69378	1
ENSMUSG00000009418	Nav1	neuron navigator 1	782.451	930.549	0.84102	-0.249788	0.280916	1
ENSMUSG00000054412	Gm4793	predicted gene 4793	10.8379	20.8899	0.540792	-0.886855	0.361237	1
ENSMUSG00000090399	Gm38399	predicted gene, 38399	205.592	273.08	0.753765	-0.407814	0.15074	1
ENSMUSG00000026421	Csrp1	cysteine and glycine-rich protein 1	640.006	939.401	0.68163	-0.552938	0.0446698	1
ENSMUSG00000026414	Tnnt2	troponin T2, cardiac	1.53017	6.4263	0.340704	-1.55341	0.439078	1
ENSMUSG00000026407	Cacna1s	calcium channel, voltage-dependent, L type, alpha 1S subunit	2.84754	5.84758	0.561883	-0.831658	0.729868	1
ENSMUSG00000041642	Kif21b	kinesin family member 21B	311.055	441.291	0.705543	-0.503195	0.545453	1
ENSMUSG00000087230	Mroh3	maestro heat-like repeat family member 3	0	7.45547	0.118267	-3.07988	0.0438615	1
ENSMUSG00000041605	5730559C18Rik	RIKEN cDNA 5730559C18 gene	74.1019	92.0485	0.807126	-0.309134	0.504148	1
ENSMUSG00000026404	Ddx59	DEAD (Asp-Glu-Ala-Asp) box polypeptide 59	79.5639	106.575	0.748907	-0.417141	0.577076	1
ENSMUSG00000041498	Kif14	kinesin family member 14	8.64902	11.7972	0.753993	-0.407378	0.656486	1
ENSMUSG00000041483	Zfp281	zinc finger protein 281	429.95	441.716	0.973424	-0.0388593	0.894317	1
ENSMUSG00000026398	Nr5a2	nuclear receptor subfamily 5, group A, member 2	26.5855	41.9317	0.642542	-0.638137	0.302157	1
ENSMUSG00000026395	Ptprc	protein tyrosine phosphatase, receptor type, C	1789.11	1947.57	0.918678	-0.122369	0.890087	1
ENSMUSG00000026394	Atp6v1g3	ATPase, H+ transporting, lysosomal V1 subunit G3	861.416	862.542	0.998696	-0.00188232	0.806091	1
ENSMUSG00000026393	Nek7	NIMA (never in mitosis gene a)-related expressed kinase 7	877.375	919.288	0.954457	-0.0672486	0.763197	1
ENSMUSG00000056268	Dennd1b	DENN/MADD domain containing 1B	741.202	760.454	0.974717	-0.0369445	0.846647	1
ENSMUSG00000063681	Crb1	crumbs family member 1, photoreceptor morphogenesis associated	9.61552	9.75145	0.987357	-0.0183563	0.885815	1
ENSMUSG00000033898	Cfhr2	complement factor H-related 2	6.70464	11.7464	0.604457	-0.726287	0.493631	1
ENSMUSG00000089991	Gm16332	predicted gene 16332	6.64129	7.91446	0.857179	-0.222332	1	1
ENSMUSG00000085867	Gm5834	predicted pseudogene 5834	1.53017	2.46024	0.731212	-0.451639	1	1
ENSMUSG00000026365	Cfh	complement component factor h	695.149	1159.13	0.600063	-0.736815	0.343456	1
ENSMUSG00000052726	Kcnt2	potassium channel, subfamily T, member 2	20.4014	35.4961	0.586403	-0.770035	0.255339	1
ENSMUSG00000026361	Cdc73	cell division cycle 73, Paf1/RNA polymerase II complex component	671.74	682.739	0.983915	-0.0233951	0.955979	1
ENSMUSG00000033849	B3galt2	UDP-Gal:betaGlcNAc beta 1,3-galactosyltransferase, polypeptide 2	72.8706	77.7437	0.938115	-0.0921635	0.892682	1
ENSMUSG00000089640	Gm6397	predicted gene 6397	9.7333	19.4853	0.523953	-0.932492	0.351537	1
ENSMUSG00000018199	Trove2	TROVE domain family, member 2	520.142	569.698	0.913166	-0.131051	0.713489	1
ENSMUSG00000026360	Rgs2	regulator of G-protein signaling 2	950.676	1084.31	0.876871	-0.189563	0.695412	1
ENSMUSG00000026357	Rgs18	regulator of G-protein signaling 18	13.1331	14.4092	0.917189	-0.124709	0.908561	1
ENSMUSG00000082588	Gm15443	predicted gene 15443	14.4188	16.7208	0.870096	-0.200753	0.859287	1
ENSMUSG00000056220	Pla2g4a	phospholipase A2, group IVA (cytosolic, calcium-dependent)	181.603	198.775	0.914042	-0.129668	0.811926	1
ENSMUSG00000032487	Ptgs2	prostaglandin-endoperoxide synthase 2	399.064	401.083	0.99498	-0.00726113	0.983439	1
ENSMUSG00000006010	BC003331	cDNA sequence BC003331	422.682	444.299	0.951456	-0.0717914	0.841874	1
ENSMUSG00000006005	Tpr	translocated promoter region, nuclear basket protein	3827.25	3909.64	0.978932	-0.0307199	0.88101	1
ENSMUSG00000006014	Prg4	proteoglycan 4 (megakaryocyte stimulating factor, articular superficial zone protein)	11.9855	13.0793	0.922314	-0.116671	1	1
ENSMUSG00000026484	Rnf2	ring finger protein 2	279.247	330.762	0.844725	-0.243446	0.41976	1
ENSMUSG00000043019	Edem3	ER degradation enhancer, mannosidase alpha-like 3	984.663	1069.05	0.921137	-0.118512	0.654802	1
ENSMUSG00000032666	1700025G04Rik	RIKEN cDNA 1700025G04 gene	236.707	247.096	0.958125	-0.0617146	0.880038	1
ENSMUSG00000026482	Rgl1	ral guanine nucleotide dissociation stimulator,-like 1	2703.23	2762.01	0.978727	-0.0310215	0.944629	1
ENSMUSG00000080950	Gm7278	predicted gene 7278	35.4992	45.3855	0.786868	-0.345807	0.49968	1
ENSMUSG00000055547	Apobec4	apolipoprotein B mRNA editing enzyme, catalytic polypeptide-like 4 (putative)	0.520614	4.59287	0.271884	-1.87893	0.570021	1
ENSMUSG00000026480	Ncf2	neutrophil cytosolic factor 2	187.488	226.835	0.827298	-0.273521	0.636675	1
ENSMUSG00000042772	Smg7	Smg-7 homolog, nonsense mediated mRNA decay factor (C. elegans)	1408.88	1414.53	0.996011	-0.00576627	0.948957	1
ENSMUSG00000042751	Nmnat2	nicotinamide nucleotide adenylyltransferase 2	12.6759	31.7092	0.418105	-1.25806	0.0489119	1
ENSMUSG00000026479	Lamc2	laminin, gamma 2	464.268	577.37	0.804446	-0.313932	0.214984	1
ENSMUSG00000073538	E330020D12Rik	Riken cDNA E330020D12 gene	2.43333	3.39945	0.780399	-0.357716	0.970275	1
ENSMUSG00000042699	Dhx9	DEAH (Asp-Glu-Ala-His) box polypeptide 9	1775.78	1871.77	0.948745	-0.0759084	0.69545	1
ENSMUSG00000043282	Teddm1b	transmembrane epididymal protein 1B	0.382542	3.93675	0.280051	-1.83624	0.608549	1
ENSMUSG00000047053	Teddm1a	transmembrane epididymal protein 1A	2.29525	3.68609	0.703199	-0.507995	0.904855	1
ENSMUSG00000004110	Cacna1e	calcium channel, voltage-dependent, R type, alpha 1E subunit	30.2298	36.0911	0.841974	-0.248153	0.869521	1
ENSMUSG00000056708	Ier5	immediate early response 5	1273.6	1417.94	0.898273	-0.154775	0.526166	1
ENSMUSG00000026471	Mr1	major histocompatibility complex, class I-related	77.7259	114.359	0.682445	-0.551215	0.202616	1
ENSMUSG00000026470	Stx6	syntaxin 6	331.929	350.677	0.946692	-0.0790337	0.838778	1
ENSMUSG00000033684	Qsox1	quiescin Q6 sulfhydryl oxidase 1	261.728	287.03	0.912153	-0.132653	0.694729	1
ENSMUSG00000033671	Cep350	centrosomal protein 350	3000.58	3293.12	0.911195	-0.134169	0.567893	1
ENSMUSG00000050565	Tor1aip2	torsin A interacting protein 2	694.063	736.814	0.942058	-0.0861121	0.794581	1
ENSMUSG00000015484	Fam163a	family with sequence similarity 163, member A	67.6961	71.5646	0.946689	-0.079037	1	1
ENSMUSG00000026602	Nphs2	nephrosis 2, podocin	294.097	486.947	0.604772	-0.725536	0.109593	1
ENSMUSG00000026601	Axdnd1	axonemal dynein light chain domain containing 1	0	3.5817	0.21826	-2.19588	0.225109	1
ENSMUSG00000026596	Abl2	v-abl Abelson murine leukemia viral oncogene 2 (arg, Abelson-related gene)	702.373	775.766	0.905514	-0.143191	0.521175	1
ENSMUSG00000026592	Tex35	testis expressed 35	1.80631	2.68391	0.761775	-0.392562	0.928589	1
ENSMUSG00000087632	Gm6058	predicted gene 6058	8.2348	8.86623	0.936002	-0.0954167	0.992278	1
ENSMUSG00000004031	Brinp2	bone morphogenic protein/retinoic acid inducible neural-specific 2	9.21269	11.9849	0.786504	-0.346475	0.83643	1
ENSMUSG00000047661	1600012P17Rik	RIKEN cDNA 1600012P17 gene	4.72858	5.20357	0.923433	-0.11492	1	1
ENSMUSG00000090394	4930523C07Rik	RIKEN cDNA 4930523C07 gene	199.686	254.196	0.786399	-0.346667	0.498935	1
ENSMUSG00000026729	4930562F07Rik	RIKEN cDNA 4930562F07 gene	1.80631	5.77917	0.413961	-1.27243	0.473065	1
ENSMUSG00000026725	Tnn	tenascin N	8.51095	24.9778	0.366119	-1.44962	0.0647769	1
ENSMUSG00000014226	Cacybp	calcyclin binding protein	446.357	508.849	0.87743	-0.188644	0.509516	1
ENSMUSG00000040423	Rc3h1	RING CCCH (C3H) domains 1	1251.59	1398.79	0.894839	-0.1603	0.521985	1
ENSMUSG00000026715	Serpinc1	serine (or cysteine) peptidase inhibitor, clade C (antithrombin), member 1	5.73813	16.1484	0.39293	-1.34766	0.203186	1
ENSMUSG00000043467	Zbtb37	zinc finger and BTB domain containing 37	247.786	282.495	0.87757	-0.188414	0.538609	1
ENSMUSG00000026708	Cenpl	centromere protein L	29.7408	41.1027	0.730139	-0.453757	0.474387	1
ENSMUSG00000026705	Klhl20	kelch-like 20	208.577	223.165	0.934923	-0.0970799	0.733668	1
ENSMUSG00000044835	Ankrd45	ankyrin repeat domain 45	20.3584	20.4155	0.997334	-0.0038507	1	1
ENSMUSG00000000817	Fasl	Fas ligand (TNF superfamily, member 6)	17.3411	31.9463	0.556697	-0.845035	0.584303	1
ENSMUSG00000040297	Suco	SUN domain containing ossification factor	688.566	874.148	0.787942	-0.343839	0.201389	1
ENSMUSG00000086277	4930558K02Rik	RIKEN cDNA 4930558K02 gene	1.2857	3.88277	0.468115	-1.09506	0.56316	1
ENSMUSG00000040265	Dnm3	dynamin 3	560.994	660.879	0.849089	-0.236012	0.332242	1
ENSMUSG00000090260	2810442N19Rik	RIKEN cDNA 2810442N19 gene	20.6345	25.1396	0.827653	-0.272902	0.796675	1
ENSMUSG00000078190	Dnm3os	dynamin 3, opposite strand	81.0826	97.3697	0.83443	-0.261137	0.477071	1
ENSMUSG00000026696	Vamp4	vesicle-associated membrane protein 4	251.252	277.339	0.906278	-0.141974	0.704448	1
ENSMUSG00000026697	Myoc	myocilin	0	4.50913	0.181517	-2.46182	0.162854	1
ENSMUSG00000040225	Prrc2c	proline-rich coiled-coil 2C	7233.53	7736.34	0.935015	-0.0969384	0.639923	1
ENSMUSG00000026586	Prrx1	paired related homeobox 1	19.9758	45.1186	0.454824	-1.13662	0.240826	1
ENSMUSG00000026584	Scyl3	SCY1-like 3 (S. cerevisiae)	275.295	290.73	0.947093	-0.0784213	0.752203	1
ENSMUSG00000041406	BC055324	cDNA sequence BC055324	16.5013	20.9731	0.796488	-0.328276	0.656794	1
ENSMUSG00000026582	Sele	selectin, endothelial cell	58.6101	62.3243	0.941347	-0.087202	0.798848	1
ENSMUSG00000026581	Sell	selectin, lymphocyte	40.7712	65.5654	0.627521	-0.672264	0.679875	1
ENSMUSG00000026580	Selp	selectin, platelet	5.52534	13.8731	0.438734	-1.18858	0.264511	1
ENSMUSG00000026575	Nme7	NME/NM23 family member 7	110.835	134.559	0.824988	-0.277555	0.812694	1
ENSMUSG00000026574	Dpt	dermatopontin	36.9027	56.7319	0.65653	-0.607068	0.631582	1
ENSMUSG00000040836	Gpr161	G protein-coupled receptor 161	32.2692	34.6495	0.933229	-0.0996969	0.822245	1
ENSMUSG00000040723	Rcsd1	RCSD domain containing 1	403.005	598.502	0.673901	-0.569392	0.0514405	1
ENSMUSG00000089829	Gm16565	predicted gene 16565	4.37771	8.23042	0.582607	-0.779404	0.545849	1
ENSMUSG00000005763	Cd247	CD247 antigen	23.876	28.7233	0.836919	-0.25684	0.7877	1
ENSMUSG00000026565	Pou2f1	POU domain, class 2, transcription factor 1	511.576	513.71	0.995855	-0.00599282	0.9615	1
ENSMUSG00000040596	Pogk	pogo transposable element with KRAB domain	533.238	552.897	0.964509	-0.0521339	0.792356	1
ENSMUSG00000088246	Gm25911	predicted gene, 25911	74.1538	85.3172	0.87067	-0.199801	0.555773	1
ENSMUSG00000040485	Lrrc52	leucine rich repeat containing 52	16.1935	24.4655	0.675167	-0.566683	0.576462	1
ENSMUSG00000026683	Nuf2	NUF2, NDC80 kinetochore complex component	7.71419	10.2168	0.776888	-0.364221	0.743892	1
ENSMUSG00000026678	Rgs5	regulator of G-protein signaling 5	1310.66	3026.1	0.433305	-1.20654	0.13109	1
ENSMUSG00000038530	Rgs4	regulator of G-protein signaling 4	111.229	208.739	0.535088	-0.902153	0.236739	1
ENSMUSG00000026674	Ddr2	discoidin domain receptor family, member 2	92.0066	164.527	0.561881	-0.831663	0.0200946	1
ENSMUSG00000026670	Uap1	UDP-N-acetylglucosamine pyrophosphorylase 1	632.993	806.244	0.78538	-0.348538	0.189702	1
ENSMUSG00000073494	Sh2d1b2	SH2 domain containing 1B2	2.29525	5.58249	0.500609	-0.998245	0.578365	1
ENSMUSG00000038473	Nos1ap	nitric oxide synthase 1 (neuronal) adaptor protein	275.879	301.687	0.914738	-0.128569	0.696491	1
ENSMUSG00000042800	Spata46	spermatogenesis associated 46	8.2348	11.7648	0.723458	-0.467018	0.656468	1
ENSMUSG00000038463	Olfml2b	olfactomedin-like 2B	86.3229	149.542	0.580058	-0.785732	0.0526872	1
ENSMUSG00000026663	Atf6	activating transcription factor 6	971.027	1025.46	0.946973	-0.0786053	0.708887	1
ENSMUSG00000053925	Gm9929	predicted gene 9929	13.8665	18.4088	0.76597	-0.384641	0.773282	1
ENSMUSG00000038421	Fcrla	Fc receptor-like A	9.4141	26.4717	0.379085	-1.39941	0.229497	1
ENSMUSG00000026656	Fcgr2b	Fc receptor, IgG, low affinity IIb	403.08	436.793	0.922992	-0.115609	0.682814	1
ENSMUSG00000059089	Fcgr4	Fc receptor, IgG, low affinity IV	63.7529	79.4747	0.804637	-0.31359	0.689574	1
ENSMUSG00000059498	Fcgr3	Fc receptor, IgG, low affinity III	217.346	220.599	0.985321	-0.0213343	0.991653	1
ENSMUSG00000056569	Mpz	myelin protein zero	8.02201	11.7589	0.707114	-0.499986	0.59069	1
ENSMUSG00000038370	Pcp4l1	Purkinje cell protein 4-like 1	186.012	330.507	0.564128	-0.825907	0.224849	1
ENSMUSG00000006403	Adamts4	a disintegrin-like and metallopeptidase (reprolysin type) with thrombospondin type 1 motif, 4	24.066	63.5572	0.388276	-1.36484	0.128129	1
ENSMUSG00000052423	B4galt3	UDP-Gal:betaGlcNAc beta 1,4-galactosyltransferase, polypeptide 3	167.021	213.783	0.78228	-0.354243	0.284702	1
ENSMUSG00000062963	Ufc1	ubiquitin-fold modifier conjugating enzyme 1	237.501	253.621	0.936688	-0.0943594	0.820684	1
ENSMUSG00000013997	Nit1	nitrilase 1	502.723	591.877	0.849626	-0.2351	0.41534	1
ENSMUSG00000006412	Pfdn2	prefoldin 2	246.874	337.061	0.733224	-0.447675	0.334415	1
ENSMUSG00000006411	Nectin4	nectin cell adhesion molecule 4	36.0312	50.3893	0.720603	-0.472724	0.401782	1
ENSMUSG00000026641	Usf1	upstream transcription factor 1	151.923	165.11	0.920613	-0.119333	0.73652	1
ENSMUSG00000091993	B930036N10Rik	RIKEN cDNA B930036N10 gene	0.765084	4.83997	0.302242	-1.72622	0.32271	1
ENSMUSG00000004709	Cd244	CD244 natural killer cell receptor 2B4	51.9486	80.2914	0.651343	-0.618511	0.535691	1
ENSMUSG00000004707	Ly9	lymphocyte antigen 9	51.8852	74.0413	0.704748	-0.504821	0.601318	1
ENSMUSG00000038179	Slamf7	SLAM family member 7	350.24	407.303	0.860241	-0.217187	0.783859	1
ENSMUSG00000015355	Cd48	CD48 antigen	61.5007	82.0478	0.752588	-0.410068	0.667247	1
ENSMUSG00000015316	Slamf1	signaling lymphocytic activation molecule family member 1	10.8493	14.6539	0.75695	-0.40173	0.834491	1
ENSMUSG00000038147	Cd84	CD84 antigen	95.1734	96.7684	0.983686	-0.0237302	0.97647	1
ENSMUSG00000073492	Gm10521	predicted gene 10521	0.765084	5.11128	0.288824	-1.79174	0.340513	1
ENSMUSG00000015314	Slamf6	SLAM family member 6	12.0286	20.2031	0.614464	-0.702599	0.684607	1
ENSMUSG00000026553	Copa	coatomer protein complex subunit alpha	2376.16	2471.53	0.96143	-0.0567468	0.926178	1
ENSMUSG00000089803	Gm10171	predicted gene 10171	2.29525	4.95647	0.553223	-0.854068	0.724449	1
ENSMUSG00000013698	Pea15a	phosphoprotein enriched in astrocytes 15A	1425.42	1506.2	0.946399	-0.0794789	0.706985	1
ENSMUSG00000007122	Casq1	calsequestrin 1	11.0823	26.2607	0.443214	-1.17392	0.122859	1
ENSMUSG00000007107	Atp1a4	ATPase, Na+/K+ transporting, alpha 4 polypeptide	3.50623	8.88066	0.456065	-1.13269	0.310242	1
ENSMUSG00000007097	Atp1a2	ATPase, Na+/K+ transporting, alpha 2 polypeptide	117.488	243.852	0.483914	-1.04718	0.0867494	1
ENSMUSG00000044708	Kcnj10	potassium inwardly-rectifying channel, subfamily J, member 10	1239.67	1482.82	0.836133	-0.258195	0.61184	1
ENSMUSG00000050229	Pigm	phosphatidylinositol glycan anchor biosynthesis, class M	301.999	326.925	0.923987	-0.114056	0.697043	1
ENSMUSG00000026547	Tagln2	transgelin 2	687.516	771.999	0.890707	-0.166977	0.531114	1
ENSMUSG00000026546	Cfap45	cilia and flagella associated protein 45	11.1887	14.7197	0.77538	-0.367024	0.683609	1
ENSMUSG00000085184	4933439K11Rik	RIKEN cDNA 4933439K11 gene	6.42849	7.6165	0.862124	-0.214033	0.994768	1
ENSMUSG00000053318	Slamf8	SLAM family member 8	35.6917	37.3795	0.956025	-0.0648803	1	1
ENSMUSG00000026544	Dusp23	dual specificity phosphatase 23	25.3631	35.3564	0.72513	-0.463689	0.508691	1
ENSMUSG00000005338	Cadm3	cell adhesion molecule 3	7.68252	23.2925	0.357416	-1.48433	0.335227	1
ENSMUSG00000037860	Aim2	absent in melanoma 2	72.6895	101.286	0.720426	-0.473079	0.474314	1
ENSMUSG00000070501	Ifi214	interferon activated gene 214	17.16	20.415	0.848002	-0.237861	0.825634	1
ENSMUSG00000043263	Ifi209	interferon activated gene 209	123.767	139.277	0.889427	-0.169052	0.798702	1
ENSMUSG00000073490	Ifi207	interferon activated gene 207	506.693	523.243	0.968431	-0.0462792	0.841417	1
ENSMUSG00000090272	Mndal	myeloid nuclear differentiation antigen like	351.439	397.19	0.885102	-0.176084	0.522496	1
ENSMUSG00000039997	Ifi203	interferon activated gene 203	814.363	832.221	0.978568	-0.0312563	0.921921	1
ENSMUSG00000078185	Chml	choroideremia-like	97.9576	114.274	0.858457	-0.220181	0.710136	1
ENSMUSG00000039748	Exo1	exonuclease 1	4.48411	4.58931	0.981178	-0.0274135	1	1
ENSMUSG00000057335	Cep170	centrosomal protein 170	725.339	766.834	0.945959	-0.0801508	0.807311	1
ENSMUSG00000026504	Sdccag8	serologically defined colon cancer antigen 8	353.444	370.754	0.953438	-0.0687887	0.739518	1
ENSMUSG00000087082	Gm15423	predicted gene 15423	9.96639	10.3031	0.970214	-0.0436258	1	1
ENSMUSG00000019699	Akt3	thymoma viral proto-oncogene 3	460.531	537.072	0.85775	-0.221371	0.480604	1
ENSMUSG00000063659	Zbtb18	zinc finger and BTB domain containing 18	392.611	396.847	0.989351	-0.0154457	1	1
ENSMUSG00000015962	1700016C15Rik	RIKEN cDNA 1700016C15 gene	80.8812	116.663	0.695896	-0.523056	0.198022	1
ENSMUSG00000015961	Adss	adenylosuccinate synthetase, non muscle	645.572	683.712	0.944297	-0.0826869	0.788829	1
ENSMUSG00000026500	Cox20	COX20 Cox2 chaperone	1.80631	4.41962	0.517806	-0.949516	0.599351	1
ENSMUSG00000039630	Hnrnpu	heterogeneous nuclear ribonucleoprotein U	5188.83	5652.79	0.917939	-0.12353	0.582427	1
ENSMUSG00000026495	Efcab2	EF-hand calcium binding domain 2	151.712	162.706	0.932845	-0.10029	0.900571	1
ENSMUSG00000026494	Kif26b	kinesin family member 26B	162.165	216.306	0.750857	-0.413391	0.167387	1
ENSMUSG00000089713	Gm16564	predicted gene 16564	1.80631	4.87595	0.477593	-1.06615	0.502628	1
ENSMUSG00000026492	Tfb2m	transcription factor B2, mitochondrial	123.628	124.282	0.994786	-0.00754201	0.895163	1
ENSMUSG00000038949	Cnst	consortin, connexin sorting protein	401.568	434.066	0.925301	-0.112005	0.659289	1
ENSMUSG00000026491	Ahctf1	AT hook containing transcription factor 1	1070.71	1077.6	0.99361	-0.0092487	0.96346	1
ENSMUSG00000026490	Cdc42bpa	CDC42 binding protein kinase alpha	2026.49	2446.45	0.82841	-0.271582	0.228178	1
ENSMUSG00000055676	Gm5069	predicted pseudogene 5069	15.2586	19.3899	0.797389	-0.326645	0.810253	1
ENSMUSG00000038855	Itpkb	inositol 1,4,5-trisphosphate 3-kinase B	1762.07	1770.86	0.995041	-0.0071724	0.957294	1
ENSMUSG00000053963	Stum	mechanosensory transduction mediator	43.5529	75.3939	0.5832	-0.777938	0.288576	1
ENSMUSG00000058729	Lin9	lin-9 homolog (C. elegans)	55.9007	63.797	0.878137	-0.187482	0.710909	1
ENSMUSG00000073485	H3f3aos	H3 histone, family 3A, opposite strand	6.77936	25.691	0.29146	-1.77863	0.0427019	1
ENSMUSG00000038806	Sde2	SDE2 telomere maintenance homolog (S. pombe)	296.833	370.179	0.802397	-0.317612	0.251085	1
ENSMUSG00000038793	Lefty1	left right determination factor 1	1.53017	6.4474	0.339738	-1.5575	0.339592	1
ENSMUSG00000085563	2210411M09Rik	RIKEN cDNA 2210411M09 gene	1.91271	12.2747	0.219419	-2.18824	0.0745054	1
ENSMUSG00000026516	Nvl	nuclear VCP-like	248.977	293.086	0.850014	-0.234442	0.436575	1
ENSMUSG00000038733	Wdr26	WD repeat domain 26	1882.52	2049.92	0.918377	-0.122842	0.635243	1
ENSMUSG00000064970	Gm23690	predicted gene, 23690	1.42377	5.02488	0.402294	-1.31368	0.440951	1
ENSMUSG00000004880	Lbr	lamin B receptor	443.98	566.582	0.783993	-0.351088	0.240331	1
ENSMUSG00000026511	Srp9	signal recognition particle 9	142.198	153.366	0.927655	-0.10834	0.654142	1
ENSMUSG00000047539	Fbxo28	F-box protein 28	285.411	336.229	0.849308	-0.23564	0.489746	1
ENSMUSG00000026510	Trp53bp2	transformation related protein 53 binding protein 2	1454.77	1684.83	0.863536	-0.211672	0.410999	1
ENSMUSG00000026509	Capn2	calpain 2	1424.99	1609.68	0.885339	-0.175698	0.477296	1
ENSMUSG00000038576	Susd4	sushi domain containing 4	126.071	139.456	0.904702	-0.144485	0.760117	1
ENSMUSG00000039384	Dusp10	dual specificity phosphatase 10	104.291	145.678	0.717836	-0.478274	0.39061	1
ENSMUSG00000044854	1700056E22Rik	RIKEN cDNA 1700056E22 gene	4.23964	8.02474	0.580586	-0.784419	0.558437	1
ENSMUSG00000059483	Gm5528	predicted gene 5528	5.17447	9.38786	0.594393	-0.750512	0.466803	1
ENSMUSG00000026621	Marc1	mitochondrial amidoxime reducing component 1	5.14279	7.46713	0.725487	-0.462977	0.808715	1
ENSMUSG00000039349	C130074G19Rik	RIKEN cDNA C130074G19 gene	2502.59	2660.46	0.940681	-0.0882222	0.750522	1
ENSMUSG00000026620	Mark1	MAP/microtubule affinity regulating kinase 1	79.5525	193.78	0.413555	-1.27385	0.0219313	1
ENSMUSG00000039318	Rab3gap2	RAB3 GTPase activating protein subunit 2	502.085	559.637	0.897345	-0.156265	0.541733	1
ENSMUSG00000065562	Mir215	microRNA 215	1.80631	3.71851	0.594745	-0.749657	0.718529	1
ENSMUSG00000051295	9630028B13Rik	RIKEN cDNA 9630028B13 gene	1.2857	4.14508	0.444249	-1.17056	0.602458	1
ENSMUSG00000039210	Gpatch2	G patch domain containing 2	450.53	514.786	0.875422	-0.191949	0.466281	1
ENSMUSG00000026605	Cenpf	centromere protein F	76.1957	97.2689	0.785556	-0.348214	0.652016	1
ENSMUSG00000066595	Mfsd7b	major facilitator superfamily domain containing 7B	317.37	473.455	0.671022	-0.575567	0.0307237	1
ENSMUSG00000062510	Nsl1	NSL1, MIS12 kinetochore complex component	5.73813	7.5653	0.786678	-0.346155	0.964884	1
ENSMUSG00000026630	Batf3	basic leucine zipper transcription factor, ATF-like 3	23.3757	26.4214	0.888928	-0.169861	0.763284	1
ENSMUSG00000091017	Fam71a	family with sequence similarity 71, member A	467.681	698.747	0.669786	-0.578228	0.333127	1
ENSMUSG00000026628	Atf3	activating transcription factor 3	5291.44	6279.92	0.842623	-0.247041	0.286366	1
ENSMUSG00000037499	Nenf	neuron derived neurotrophic factor	168.266	179.523	0.93764	-0.0928944	0.83273	1
ENSMUSG00000037461	Ints7	integrator complex subunit 7	227.503	260.813	0.87277	-0.196326	0.565275	1
ENSMUSG00000026623	Lpgat1	lysophosphatidylglycerol acyltransferase 1	1214.18	1218.28	0.996641	-0.00485388	0.929619	1
ENSMUSG00000026622	Nek2	NIMA (never in mitosis gene a)-related expressed kinase 2	17.6172	27.3732	0.656156	-0.607889	0.412356	1
ENSMUSG00000049353	Rd3	retinal degeneration 3	3.7507	3.96328	0.957168	-0.0631561	1	1
ENSMUSG00000037395	Rcor3	REST corepressor 3	266.943	278.086	0.960071	-0.0587863	0.810434	1
ENSMUSG00000058248	Kcnh1	potassium voltage-gated channel, subfamily H (eag-related), member 1	9.27603	20.3173	0.482052	-1.05274	0.243069	1
ENSMUSG00000016200	Syt14	synaptotagmin XIV	59.1941	87.6944	0.678669	-0.55922	0.401566	1
ENSMUSG00000026638	Irf6	interferon regulatory factor 6	261.449	429.186	0.610083	-0.712923	0.0843373	1
ENSMUSG00000079144	A130010J15Rik	RIKEN cDNA A130010J15 gene	24.5663	31.7716	0.780138	-0.358199	0.662977	1
ENSMUSG00000037318	Traf3ip3	TRAF3 interacting protein 3	66.8563	88.5756	0.757532	-0.400622	0.695039	1
ENSMUSG00000090080	Gm15872	predicted gene 15872	3.82542	7.22236	0.586866	-0.768897	0.761849	1
ENSMUSG00000016194	Hsd11b1	hydroxysteroid 11-beta dehydrogenase 1	51.0137	106.412	0.484243	-1.0462	0.0242008	1
ENSMUSG00000009633	G0s2	G0/G1 switch gene 2	238.689	239.449	0.99684	-0.00456675	0.973988	1
ENSMUSG00000026640	Plxna2	plexin A2	1051.54	1283.85	0.819198	-0.287715	0.428191	1
ENSMUSG00000016493	Cd46	CD46 antigen, complement regulatory protein	19.9645	24.552	0.820463	-0.285491	0.585685	1
ENSMUSG00000026616	Cr2	complement receptor 2	40.6965	61.7172	0.664833	-0.588935	0.368178	1
ENSMUSG00000064065	Ipcef1	interaction protein for cytohesin exchange factors 1	442.563	506.107	0.874693	-0.193151	0.516247	1
ENSMUSG00000000766	Oprm1	opioid receptor, mu 1	19.4552	21.2687	0.918563	-0.122549	0.872277	1
ENSMUSG00000093189	Gm25694	predicted gene, 25694	1.56184	2.46924	0.738445	-0.437437	0.897561	1
ENSMUSG00000019768	Esr1	estrogen receptor 1 (alpha)	116.073	150.381	0.773365	-0.370779	0.335707	1
ENSMUSG00000061759	Armt1	acidic residue methyltransferase 1	111.876	128.911	0.86887	-0.202788	0.61893	1
ENSMUSG00000075327	Zbtb2	zinc finger and BTB domain containing 2	177.648	234.822	0.757553	-0.40058	0.20596	1
ENSMUSG00000038587	Akap12	A kinase (PRKA) anchor protein (gravin) 12	2000.31	2496.12	0.801447	-0.319322	0.285349	1
ENSMUSG00000040675	Mthfd1l	methylenetetrahydrofolate dehydrogenase (NADP+ dependent) 1-like	27.4025	55.3091	0.504404	-0.987349	0.126689	1
ENSMUSG00000040624	Plekhg1	pleckstrin homology domain containing, family G (with RhoGef domain) member 1	604.558	717.813	0.842442	-0.247351	0.294339	1
ENSMUSG00000082605	Gm16148	predicted gene 16148	5.41894	7.52699	0.752779	-0.409702	0.763596	1
ENSMUSG00000040021	Lats1	large tumor suppressor	966.638	986.79	0.979599	-0.0297365	0.830231	1
ENSMUSG00000019794	Katna1	katanin p60 (ATPase-containing) subunit A1	167.055	194.324	0.860388	-0.216941	0.563129	1
ENSMUSG00000092190	Gm20470	predicted gene 20470	3.8571	7.38972	0.578934	-0.788529	0.610501	1
ENSMUSG00000040006	Ginm1	glycoprotein integral membrane 1	434.812	455.19	0.95533	-0.0659287	0.7865	1
ENSMUSG00000085211	B430219N15Rik	RIKEN cDNA B430219N15 gene	1.80631	3.45342	0.630147	-0.666239	0.782834	1
ENSMUSG00000015757	Ppil4	peptidylprolyl isomerase (cyclophilin)-like 4	473.811	605.553	0.782802	-0.353281	0.170097	1
ENSMUSG00000015755	Tab2	TGF-beta activated kinase 1/MAP3K7 binding protein 2	1271.61	1275.39	0.997042	-0.0042734	1	1
ENSMUSG00000047712	Ust	uronyl-2-sulfotransferase	45.8823	50.7143	0.906563	-0.14152	0.914428	1
ENSMUSG00000015305	Sash1	SAM and SH3 domain containing 1	1069.83	1247.42	0.857749	-0.221372	0.375622	1
ENSMUSG00000060487	Samd5	sterile alpha motif domain containing 5	13.1015	15.7276	0.843003	-0.24639	0.868689	1
ENSMUSG00000019790	Stxbp5	syntaxin binding protein 5 (tomosyn)	499.487	538.827	0.927126	-0.109163	0.789742	1
ENSMUSG00000047648	Fbxo30	F-box protein 30	403.883	469.274	0.860951	-0.215998	0.359338	1
ENSMUSG00000019820	Utrn	utrophin	6860.02	7581.78	0.904817	-0.144302	0.5372	1
ENSMUSG00000039232	Stx11	syntaxin 11	47.2947	52.7031	0.89929	-0.153141	0.930226	1
ENSMUSG00000019817	Plagl1	pleiomorphic adenoma gene-like 1	198.975	215.468	0.923811	-0.114331	0.822332	1
ENSMUSG00000062866	Phactr2	phosphatase and actin regulator 2	1219.96	1499.31	0.813805	-0.297245	0.192723	1
ENSMUSG00000019810	Fuca2	fucosidase, alpha-L- 2, plasma	1267.37	1727.64	0.733736	-0.446666	0.105613	1
ENSMUSG00000015501	Hivep2	human immunodeficiency virus type I enhancer binding protein 2	1026.12	1185.28	0.865834	-0.207838	0.393995	1
ENSMUSG00000039116	Adgrg6	adhesion G protein-coupled receptor G6	74.7606	86.288	0.867937	-0.204337	0.598534	1
ENSMUSG00000039891	Txlnb	taxilin beta	21.2412	26.1775	0.818368	-0.289178	0.835787	1
ENSMUSG00000039879	Heca	hdc homolog, cell cycle regulator	498.219	549.314	0.907154	-0.140581	0.597364	1
ENSMUSG00000078453	Abracl	ABRA C-terminal like	75.537	86.8046	0.871675	-0.198138	0.681782	1
ENSMUSG00000019854	Reps1	RalBP1 associated Eps domain containing protein	342.451	370.808	0.92373	-0.114456	0.732664	1
ENSMUSG00000059554	Ccdc28a	coiled-coil domain containing 28A	77.6828	88.7761	0.876434	-0.190282	0.660464	1
ENSMUSG00000039835	Nhsl1	NHS-like 1	727.594	745.32	0.976249	-0.0346791	0.948505	1
ENSMUSG00000019850	Tnfaip3	tumor necrosis factor, alpha-induced protein 3	1701.3	2196.57	0.774625	-0.368429	0.429279	1
ENSMUSG00000020009	Ifngr1	interferon gamma receptor 1	797.421	863.298	0.92378	-0.114379	0.866507	1
ENSMUSG00000071369	Map3k5	mitogen-activated protein kinase kinase kinase 5	1348.04	1599.78	0.842743	-0.246835	0.442731	1
ENSMUSG00000069713	4933406P04Rik	RIKEN cDNA 4933406P04 gene	19.6997	36.8171	0.547363	-0.86943	0.212819	1
ENSMUSG00000037608	Bclaf1	BCL2-associated transcription factor 1	1932.69	2082.3	0.928185	-0.107516	0.635248	1
ENSMUSG00000019992	Mtfr2	mitochondrial fission regulator 2	14.0996	20.8628	0.690654	-0.533965	0.443862	1
ENSMUSG00000092051	Gm17229	predicted gene 17229	48.7071	72.2544	0.678555	-0.559463	0.198408	1
ENSMUSG00000091730	Gm17230	predicted gene 17230	16.2251	16.3842	0.990849	-0.0132625	1	1
ENSMUSG00000019982	Myb	myeloblastosis oncogene	10.1792	20.4034	0.52231	-0.937021	0.255622	1
ENSMUSG00000019977	Hbs1l	Hbs1-like (S. cerevisiae)	322.271	332.015	0.97074	-0.0428438	0.942121	1
ENSMUSG00000044268	Gm4895	predicted gene 4895	194.828	280.488	0.695691	-0.523481	0.0912352	1
ENSMUSG00000075297	H60b	histocompatibility 60b	22.0266	33.0649	0.675962	-0.564985	0.598609	1
ENSMUSG00000045680	Tcf21	transcription factor 21	47.795	55.7481	0.859853	-0.217838	0.837572	1
ENSMUSG00000010461	Eya4	EYA transcriptional coactivator and phosphatase 4	10.0094	15.0328	0.686684	-0.542281	0.697127	1
ENSMUSG00000080486	Snord100	small nucleolar RNA, C/D box 100	1.14763	4.55955	0.386295	-1.37222	0.543769	1
ENSMUSG00000037455	Slc18b1	solute carrier family 18, subfamily B, member 1	147.715	164.027	0.901155	-0.150153	0.716452	1
ENSMUSG00000020010	Vnn3	vanin 3	1.53017	4.5299	0.457543	-1.12802	0.55705	1
ENSMUSG00000019998	Stx7	syntaxin 7	1052.27	1068.19	0.985107	-0.0216482	0.953477	1
ENSMUSG00000087400	Gm15270	predicted gene 15270	6.18402	12.2896	0.540577	-0.887429	0.370876	1
ENSMUSG00000081259	Gm6893	predicted gene 6893	0	4.57443	0.179391	-2.47882	0.145739	1
ENSMUSG00000019997	Ctgf	connective tissue growth factor	713.972	1131.24	0.631467	-0.663222	0.0205497	1
ENSMUSG00000037370	Enpp1	ectonucleotide pyrophosphatase/phosphodiesterase 1	491.938	566.383	0.868792	-0.202918	0.60292	1
ENSMUSG00000019984	Med23	mediator complex subunit 23	295.93	327.571	0.903702	-0.146082	0.622999	1
ENSMUSG00000019978	Epb41l2	erythrocyte membrane protein band 4.1 like 2	1035.56	1106.14	0.936245	-0.0950417	0.623255	1
ENSMUSG00000049420	Tmem200a	transmembrane protein 200A	1.53017	3.19066	0.603764	-0.727944	0.878104	1
ENSMUSG00000051354	Samd3	sterile alpha motif domain containing 3	5.63173	14.6594	0.423499	-1.23957	0.560596	1
ENSMUSG00000019899	Lama2	laminin, alpha 2	162.349	332.354	0.490017	-1.0291	0.0952018	1
ENSMUSG00000049109	Themis	thymocyte selection associated	20.8156	22.8272	0.915579	-0.127244	1	1
ENSMUSG00000004360	9330159F19Rik	RIKEN cDNA 9330159F19 gene	0.765084	8.47519	0.186285	-2.42442	0.0874068	1
ENSMUSG00000038876	Rnf146	ring finger protein 146	409.377	421.891	0.970408	-0.0433373	0.897611	1
ENSMUSG00000075266	Cenpw	centromere protein W	3.71902	7.67591	0.543922	-0.878527	0.608954	1
ENSMUSG00000019791	Hint3	histidine triad nucleotide binding protein 3	192.766	201.515	0.956799	-0.0637129	0.908857	1
ENSMUSG00000088600	Gm24189	predicted gene, 24189	3.88877	4.87595	0.831996	-0.265351	0.829359	1
ENSMUSG00000019789	Hey2	hairy/enhancer-of-split related with YRPW motif 2	82.742	154.185	0.539627	-0.889966	0.304635	1
ENSMUSG00000039684	Gm5422	predicted pseudogene 5422	287.879	324.613	0.887185	-0.172693	0.70391	1
ENSMUSG00000000296	Tpd52l1	tumor protein D52-like 1	219.616	248.703	0.883515	-0.178673	0.66022	1
ENSMUSG00000063760	Rnf217	ring finger protein 217	69.928	87.3243	0.803041	-0.316455	0.650171	1
ENSMUSG00000039552	Rsph4a	radial spoke head 4 homolog A (Chlamydomonas)	21.8885	38.0259	0.586497	-0.769805	0.237853	1
ENSMUSG00000039531	Zufsp	zinc finger with UFM1-specific peptidase domain	208.048	225.61	0.922498	-0.116382	0.690147	1
ENSMUSG00000049872	Fam26e	family with sequence similarity 26, member E	9.5205	13.8516	0.708377	-0.497411	0.638193	1
ENSMUSG00000039497	Dse	dermatan sulfate epimerase	161.337	185.372	0.871036	-0.199196	0.646064	1
ENSMUSG00000047514	Tspyl1	testis-specific protein, Y-encoded-like 1	727.209	741.742	0.980433	-0.0285085	0.99166	1
ENSMUSG00000039480	Nt5dc1	5'-nucleotidase domain containing 1	240.783	247.503	0.972959	-0.039549	0.897344	1
ENSMUSG00000039485	Tspyl4	TSPY-like 4	79.6386	89.947	0.886654	-0.173556	0.751796	1
ENSMUSG00000019779	Frk	fyn-related kinase	308.841	362.873	0.85151	-0.231904	0.426108	1
ENSMUSG00000046463	5930403N24Rik	RIKEN cDNA 5930403N24 gene	5.93955	7.02567	0.864669	-0.20978	0.920164	1
ENSMUSG00000019843	Fyn	Fyn proto-oncogene	459.098	494.391	0.928758	-0.106625	0.767957	1
ENSMUSG00000085799	Gm6963	predicted gene 6963	12.8139	16.4225	0.792878	-0.33483	0.593189	1
ENSMUSG00000087014	Gm16364	predicted gene 16364	6.39682	10.1037	0.666156	-0.586068	0.751163	1
ENSMUSG00000086915	Gm16365	predicted gene 16365	3.96349	5.41824	0.773342	-0.370821	0.939107	1
ENSMUSG00000019842	Traf3ip2	TRAF3 interacting protein 2	94.7161	129.552	0.733166	-0.447788	0.235697	1
ENSMUSG00000087177	E130307A14Rik	RIKEN cDNA E130307A14 gene	84.6636	92.2822	0.918327	-0.12292	0.756484	1
ENSMUSG00000019841	Rev3l	REV3 like, DNA directed polymerase zeta catalytic subunit	1158.4	1218.79	0.950497	-0.0732461	0.798606	1
ENSMUSG00000080384	Gm22105	predicted gene, 22105	3.50623	4.41962	0.831466	-0.266271	0.863994	1
ENSMUSG00000039339	Mfsd4b2	major facilitator superfamily domain containing 4B2	2.08246	4.23782	0.5885	-0.764886	0.615414	1
ENSMUSG00000071335	Mfsd4b3	major facilitator superfamily domain containing 4B3	126.134	134.61	0.9375	-0.0931094	0.77432	1
ENSMUSG00000077200	Gm25613	predicted gene, 25613	1.56184	7.19893	0.312461	-1.67825	0.203588	1
ENSMUSG00000038510	Rpf2	ribosome production factor 2 homolog	73.1557	82.7521	0.885418	-0.175569	0.651525	1
ENSMUSG00000038491	Cdk19os	cyclin-dependent kinase 19, opposite strand	3.6443	5.13205	0.757382	-0.400908	0.77699	1
ENSMUSG00000038481	Cdk19	cyclin-dependent kinase 19	408.109	423.065	0.964732	-0.0518001	0.738484	1
ENSMUSG00000063428	Ddo	D-aspartate oxidase	540.771	561.049	0.963922	-0.0530122	0.827999	1
ENSMUSG00000089186	Gm22948	predicted gene, 22948	1.04123	2.90758	0.522377	-0.936838	0.630254	1
ENSMUSG00000019823	Mical1	microtubule associated monooxygenase, calponin and LIM domain containing 1	166.756	182.038	0.916507	-0.125782	0.669359	1
ENSMUSG00000078451	Ppil6	peptidylprolyl isomerase (cyclophilin)-like 6	30.6123	39.9939	0.771146	-0.374924	0.537376	1
ENSMUSG00000075225	Ccdc162	coiled-coil domain containing 162	15.6412	22.6232	0.704443	-0.505445	0.660511	1
ENSMUSG00000038332	Sesn1	sestrin 1	259.93	275.461	0.943824	-0.0834101	0.714581	1
ENSMUSG00000071324	Armc2	armadillo repeat containing 2	14.0363	27.9989	0.518513	-0.947548	0.340597	1
ENSMUSG00000048756	Foxo3	forkhead box O3	2536	2548.43	0.995122	-0.00705458	0.948514	1
ENSMUSG00000083429	Gm15198	predicted gene 15198	0.382542	3.6591	0.29674	-1.75273	0.377631	1
ENSMUSG00000019802	Sec63	SEC63-like (S. cerevisiae)	1334.31	1536.81	0.868321	-0.2037	0.419413	1
ENSMUSG00000087719	Gm26464	predicted gene, 26464	2.70947	4.58387	0.664318	-0.590054	0.81944	1
ENSMUSG00000044770	Scml4	sex comb on midleg-like 4 (Drosophila)	23.4504	34.0105	0.698373	-0.517929	0.436748	1
ENSMUSG00000038248	Sobp	sine oculis-binding protein homolog (Drosophila)	12.6872	33.5965	0.395625	-1.33779	0.0727651	1
ENSMUSG00000019797	1700021F05Rik	RIKEN cDNA 1700021F05 gene	241.879	257.079	0.941102	-0.0875774	0.808019	1
ENSMUSG00000047139	Cd24a	CD24a antigen	2702.01	3480.38	0.776421	-0.365089	0.143161	1
ENSMUSG00000075184	F930017D23Rik	RIKEN cDNA F930017D23 gene	1.42377	2.7883	0.639804	-0.644299	0.818812	1
ENSMUSG00000019863	Qrsl1	glutaminyl-tRNA synthase (glutamine-hydrolyzing)-like 1	111.462	112.749	0.988684	-0.0164193	0.979863	1
ENSMUSG00000019866	Crybg1	crystallin beta-gamma domain containing 1	645.438	707.907	0.911879	-0.133085	0.61125	1
ENSMUSG00000019849	Prep	prolyl endopeptidase	230.224	255.482	0.90152	-0.149568	0.639551	1
ENSMUSG00000056073	Grik2	glutamate receptor, ionotropic, kainate 2 (beta 2)	3.33648	4.03169	0.861833	-0.214519	1	1
ENSMUSG00000038774	Ascc3	activating signal cointegrator 1 complex subunit 3	697.344	786.288	0.887025	-0.172953	0.487245	1
ENSMUSG00000062593	Lilrb4a	leukocyte immunoglobulin-like receptor, subfamily B, member 4A	716.138	805.741	0.888933	-0.169854	0.705309	1
ENSMUSG00000019893	Ros1	Ros1 proto-oncogene	7.19358	15.3906	0.499895	-1.0003	0.330382	1
ENSMUSG00000038594	Cep85l	centrosomal protein 85-like	173.495	255.79	0.679523	-0.557405	0.18147	1
ENSMUSG00000038583	Pln	phospholamban	97.523	136.904	0.714433	-0.48513	0.610051	1
ENSMUSG00000058298	Mcm9	minichromosome maintenance 9 homologous recombination repair factor	166.152	185.758	0.895015	-0.160016	0.654549	1
ENSMUSG00000047669	Msl3l2	male-specific lethal 3-like 2 (Drosophila)	21.3249	33.236	0.652088	-0.616861	0.296893	1
ENSMUSG00000045048	Gm9795	predicted pseudogene 9795	0.765084	4.05557	0.349136	-1.51814	0.449545	1
ENSMUSG00000019878	Hsf2	heat shock factor 2	173.512	176.384	0.983812	-0.0235454	0.924787	1
ENSMUSG00000019877	Serinc1	serine incorporator 1	1452.22	1621.69	0.895559	-0.159139	0.604966	1
ENSMUSG00000019872	Smpdl3a	sphingomyelin phosphodiesterase, acid-like 3A	1383.59	1594.03	0.868065	-0.204124	0.432576	1
ENSMUSG00000038039	Gcc2	GRIP and coiled-coil domain containing 2	1160.66	1199.16	0.967925	-0.0470324	0.82502	1
ENSMUSG00000019920	Lims1	LIM and senescent cell antigen-like domains 1	430.1	455.619	0.944113	-0.0829692	0.732509	1
ENSMUSG00000003226	Ranbp2	RAN binding protein 2	3306.08	3690.14	0.89595	-0.158511	0.512721	1
ENSMUSG00000003227	Edar	ectodysplasin-A receptor	26.1599	31.7836	0.828459	-0.271497	0.896412	1
ENSMUSG00000037990	Sh3rf3	SH3 domain containing ring finger 3	6.24737	12.8115	0.524734	-0.930343	0.280275	1
ENSMUSG00000019917	Sept10	septin 10	220.723	233.785	0.944369	-0.0825776	0.795731	1
ENSMUSG00000019916	P4ha1	procollagen-proline, 2-oxoglutarate 4-dioxygenase (proline 4-hydroxylase), alpha 1 polypeptide	671.191	870.762	0.771071	-0.375064	0.12472	1
ENSMUSG00000009654	Oit3	oncoprotein induced transcript 3	4.16491	4.78366	0.893017	-0.16324	0.932068	1
ENSMUSG00000090350	Gm17148	predicted gene 17148	3.12368	3.73062	0.871701	-0.198095	0.973072	1
ENSMUSG00000091184	Gm17059	predicted gene 17059	6.73631	9.55744	0.732783	-0.448542	0.716405	1
ENSMUSG00000020109	Dnajb12	DnaJ heat shock protein family (Hsp40) member B12	1111.67	1132.03	0.982028	-0.0261643	0.946838	1
ENSMUSG00000020108	Ddit4	DNA-damage-inducible transcript 4	184.808	232.561	0.795543	-0.329988	0.244511	1
ENSMUSG00000020107	Anapc16	anaphase promoting complex subunit 16	303.189	312.548	0.970153	-0.0437165	0.971137	1
ENSMUSG00000058297	Spock2	sparc/osteonectin, cwcv and kazal-like domains proteoglycan 2	27.7761	71.0188	0.399564	-1.3235	0.0502631	1
ENSMUSG00000057337	Chst3	carbohydrate (chondroitin 6/keratan) sulfotransferase 3	58.0806	133.339	0.439788	-1.18512	0.0481143	1
ENSMUSG00000004207	Psap	prosaposin	7450.79	8810.96	0.845645	-0.241876	0.341824	1
ENSMUSG00000012819	Cdh23	cadherin 23 (otocadherin)	20.4965	46.6169	0.451446	-1.14737	0.0413061	1
ENSMUSG00000020101	Vsir	V-set immunoregulatory receptor	432.959	467.542	0.92619	-0.110619	0.787761	1
ENSMUSG00000020099	Unc5b	unc-5 netrin receptor B	266.053	339.64	0.783975	-0.35112	0.306108	1
ENSMUSG00000020097	Sgpl1	sphingosine phosphate lyase 1	711.697	751.197	0.947487	-0.0778225	0.862629	1
ENSMUSG00000059901	Adamts14	a disintegrin-like and metallopeptidase (reprolysin type) with thrombospondin type 1 motif, 14	15.2903	37.2754	0.425607	-1.2324	0.271063	1
ENSMUSG00000037202	Prf1	perforin 1 (pore forming protein)	18.4254	41.5245	0.456805	-1.13035	0.506411	1
ENSMUSG00000020092	Pald1	phosphatase domain containing, paladin 1	139.695	192.716	0.726296	-0.46137	0.386207	1
ENSMUSG00000020088	Sar1a	secretion associated Ras related GTPase 1A	592.283	676.19	0.876095	-0.19084	0.464645	1
ENSMUSG00000020085	Aifm2	apoptosis-inducing factor, mitochondrion-associated 2	115.043	130.292	0.883853	-0.178122	0.81068	1
ENSMUSG00000020086	H2afy2	H2A histone family, member Y2	25.8204	35.3604	0.737626	-0.439039	0.691923	1
ENSMUSG00000058806	Col13a1	collagen, type XIII, alpha 1	19.1044	24.7429	0.780967	-0.356667	0.530765	1
ENSMUSG00000037031	Tspan15	tetraspanin 15	212.083	233.139	0.910073	-0.135946	0.752396	1
ENSMUSG00000037012	Hk1	hexokinase 1	2401.16	2574.75	0.932603	-0.100664	0.76121	1
ENSMUSG00000020080	Hkdc1	hexokinase domain containing 1	46.6246	49.1753	0.949165	-0.075269	0.950931	1
ENSMUSG00000020077	Srgn	serglycin	779.203	890.414	0.875242	-0.192245	0.662475	1
ENSMUSG00000020075	Ddx21	DEAD (Asp-Glu-Ala-Asp) box polypeptide 21	1088.97	1139.33	0.955838	-0.0651621	0.756918	1
ENSMUSG00000020076	Ddx50	DEAD (Asp-Glu-Ala-Asp) box polypeptide 50	544.542	589.955	0.923154	-0.115357	0.614697	1
ENSMUSG00000036923	Stox1	storkhead box 1	16.1187	23.8329	0.689357	-0.536676	0.471047	1
ENSMUSG00000020074	Ccar1	cell division cycle and apoptosis regulator 1	1785.24	1967.06	0.907614	-0.139849	0.50483	1
ENSMUSG00000020070	Rufy2	RUN and FYVE domain-containing 2	346.749	370.467	0.936151	-0.0951874	0.638524	1
ENSMUSG00000084985	Gm16135	predicted gene 16135	5.69508	6.75436	0.863395	-0.211907	0.822442	1
ENSMUSG00000020069	Hnrnph3	heterogeneous nuclear ribonucleoprotein H3	127.356	140.567	0.906681	-0.141333	0.741832	1
ENSMUSG00000020064	Herc4	hect domain and RLD 4	533.614	739.859	0.721614	-0.4707	0.079048	1
ENSMUSG00000020063	Sirt1	sirtuin 1	441.449	567.853	0.777792	-0.362545	0.194678	1
ENSMUSG00000036764	Dnajc12	DnaJ heat shock protein family (Hsp40) member C12	459.979	468.894	0.981026	-0.0276362	1	1
ENSMUSG00000060843	Ctnna3	catenin (cadherin associated protein), alpha 3	103.917	171.754	0.607323	-0.719465	0.400015	1
ENSMUSG00000062561	Gm10118	predicted gene 10118	13.7171	24.5095	0.576927	-0.79354	0.513262	1
ENSMUSG00000042846	Lrrtm3	leucine rich repeat transmembrane neuronal 3	7.46972	28.2053	0.290006	-1.78585	0.0224769	1
ENSMUSG00000019873	Reep3	receptor accessory protein 3	774.325	911.966	0.849238	-0.23576	0.377357	1
ENSMUSG00000037876	Jmjd1c	jumonji domain containing 1C	3128.51	3754.68	0.833274	-0.263136	0.229546	1
ENSMUSG00000089498	Gm26359	predicted gene, 26359	4.89832	7.06443	0.7314	-0.451268	0.757264	1
ENSMUSG00000075000	Nrbf2	nuclear receptor binding factor 2	157.851	171.073	0.923159	-0.115349	0.712126	1
ENSMUSG00000037868	Egr2	early growth response 2	511.504	660.903	0.774288	-0.369057	0.496184	1
ENSMUSG00000037855	Zfp365	zinc finger protein 365	7.33165	7.43748	0.987457	-0.0182096	1	1
ENSMUSG00000037846	Rtkn2	rhotekin 2	0.382542	4.34487	0.258667	-1.95083	0.401158	1
ENSMUSG00000019947	Arid5b	AT rich interactive domain 5B (MRF1-like)	1198.83	1483.29	0.808356	-0.306937	0.206511	1
ENSMUSG00000060044	Tmem26	transmembrane protein 26	242.943	314.81	0.772434	-0.372516	0.232775	1
ENSMUSG00000090622	A930033H14Rik	RIKEN cDNA A930033H14 gene	39.5691	42.842	0.92535	-0.11193	0.873425	1
ENSMUSG00000019942	Cdk1	cyclin-dependent kinase 1	5.45061	8.55848	0.674857	-0.567346	0.587368	1
ENSMUSG00000048701	Ccdc6	coiled-coil domain containing 6	896.781	1203.55	0.745327	-0.424055	0.100424	1
ENSMUSG00000052426	Gm9877	predicted gene 9877	3.12368	3.86478	0.847662	-0.23844	0.840649	1
ENSMUSG00000043259	Fam13c	family with sequence similarity 13, member C	100.739	129.83	0.777644	-0.362819	0.372017	1
ENSMUSG00000087774	Gm22320	predicted gene, 22320	0.765084	4.92048	0.298132	-1.74598	0.347455	1
ENSMUSG00000003923	Tfam	transcription factor A, mitochondrial	357.899	364.056	0.983134	-0.0245407	0.946099	1
ENSMUSG00000019927	Ube2d1	ubiquitin-conjugating enzyme E2D 1	161.178	172.363	0.935486	-0.0962122	0.796047	1
ENSMUSG00000053830	Gm9923	predicted pseudogene 9923	69.1832	93.3387	0.74395	-0.426723	0.370383	1
ENSMUSG00000019923	Zwint	ZW10 interactor	551.759	568.602	0.97043	-0.0433035	0.892638	1
ENSMUSG00000040009	Gnaz	guanine nucleotide binding protein, alpha z subunit	111.79	143.119	0.782617	-0.353621	0.356171	1
ENSMUSG00000033444	Specc1l	sperm antigen with calponin homology and coiled-coil domains 1-like	1213.68	1272.5	0.953806	-0.0682316	0.76311	1
ENSMUSG00000020178	Adora2a	adenosine A2a receptor	28.5729	39.4025	0.731957	-0.45017	0.632797	1
ENSMUSG00000046807	Lrrc75b	leucine rich repeat containing 75B	32.3122	44.3027	0.735325	-0.443545	0.501896	1
ENSMUSG00000006345	Ggt1	gamma-glutamyltransferase 1	3277.76	4427.95	0.740303	-0.433813	0.292717	1
ENSMUSG00000006344	Ggt5	gamma-glutamyltransferase 5	38.0503	52.1335	0.734947	-0.444287	0.460134	1
ENSMUSG00000055872	Gm9985	predicted gene 9985	2.60307	7.02612	0.448918	-1.15548	0.337466	1
ENSMUSG00000020196	Cabin1	calcineurin binding protein 1	1193.38	1242.17	0.960751	-0.057766	0.783146	1
ENSMUSG00000050157	Gm867	predicted gene 867	4.62218	7.3393	0.674179	-0.568797	0.744083	1
ENSMUSG00000000903	Vpreb3	pre-B lymphocyte gene 3	0	3.45342	0.224546	-2.15492	0.254656	1
ENSMUSG00000049764	Zfp280b	zinc finger protein 280B	122.872	135.988	0.904255	-0.145199	0.651549	1
ENSMUSG00000033208	S100b	S100 protein, beta polypeptide, neural	3.61263	7.2318	0.560342	-0.83562	0.507506	1
ENSMUSG00000001151	Pcnt	pericentrin (kendrin)	1755.05	1875.34	0.935891	-0.0955879	0.669789	1
ENSMUSG00000001150	Mcm3ap	minichromosome maintenance complex component 3 associated protein	608.493	665.345	0.91468	-0.128661	0.717	1
ENSMUSG00000085468	Gm15343	predicted gene 15343	12.0919	28.5904	0.442438	-1.17645	0.128784	1
ENSMUSG00000001155	Ftcd	formiminotransferase cyclodeaminase	17.6172	50.3613	0.362476	-1.46404	0.241984	1
ENSMUSG00000001119	Col6a1	collagen, type VI, alpha 1	152.412	317.936	0.481012	-1.05586	0.0308493	1
ENSMUSG00000001120	Pcbp3	poly(rC) binding protein 3	142.063	220.152	0.646899	-0.628387	0.0608686	1
ENSMUSG00000074919	Gm10787	predicted gene 10787	41.3868	73.2149	0.571136	-0.808093	0.583558	1
ENSMUSG00000078444	Gm10941	predicted gene 10941	2.32693	6.28626	0.456603	-1.13099	0.479745	1
ENSMUSG00000020260	Pofut2	protein O-fucosyltransferase 2	294.696	310.782	0.948406	-0.076424	0.762986	1
ENSMUSG00000020265	Sumo3	small ubiquitin-like modifier 3	703.172	720.671	0.975752	-0.0354134	0.893563	1
ENSMUSG00000069581	Tspear	thrombospondin type laminin G domain and EAR repeats	0.765084	5.62159	0.266565	-1.90744	0.271112	1
ENSMUSG00000051652	Lrrc3	leucine rich repeat containing 3	95.1734	153.453	0.622672	-0.683457	0.0797756	1
ENSMUSG00000009292	Trpm2	transient receptor potential cation channel, subfamily M, member 2	109.825	124.812	0.880882	-0.182979	0.676165	1
ENSMUSG00000000732	Icosl	icos ligand	226.099	243.779	0.927772	-0.108157	0.706903	1
ENSMUSG00000032834	Pwp2	PWP2 periodic tryptophan protein homolog (yeast)	123.447	151.962	0.813586	-0.297633	0.436075	1
ENSMUSG00000060205	Olfr57	olfactory receptor 57	0	5.29619	0.158826	-2.65448	0.339309	1
ENSMUSG00000052151	Plpp2	phospholipid phosphatase 2	122.725	130.702	0.939433	-0.0901378	0.931736	1
ENSMUSG00000020307	Cdc34	cell division cycle 34	175.672	183.664	0.956719	-0.0638323	0.984596	1
ENSMUSG00000054206	Gzmm	granzyme M (lymphocyte met-ase 1)	7.85226	19.6968	0.427711	-1.22529	0.160828	1
ENSMUSG00000020329	Polrmt	polymerase (RNA) mitochondrial (DNA directed)	414.658	428.239	0.968359	-0.0463861	0.953214	1
ENSMUSG00000035890	Rnf126	ring finger protein 126	270.569	282.029	0.959511	-0.0596282	0.938892	1
ENSMUSG00000020325	Fstl3	follistatin-like 3	38.1454	50.705	0.757091	-0.401462	0.577531	1
ENSMUSG00000091994	E130317F20Rik	RIKEN cDNA E130317F20 gene	58.4721	62.8785	0.931019	-0.103118	0.890799	1
ENSMUSG00000006498	Ptbp1	polypyrimidine tract binding protein 1	1318.04	1407.54	0.936459	-0.0947121	0.727599	1
ENSMUSG00000035835	Plppr3	phospholipid phosphatase related 3	75.7384	89.9636	0.843617	-0.24534	0.697404	1
ENSMUSG00000013833	Med16	mediator complex subunit 16	311.315	312.34	0.996729	-0.00472647	1	1
ENSMUSG00000013858	Tmem259	transmembrane protein 259	857.168	884.786	0.968821	-0.0456978	0.911534	1
ENSMUSG00000004665	Cnn2	calponin 2	286.392	325.199	0.881033	-0.182733	0.666277	1
ENSMUSG00000035722	Abca7	ATP-binding cassette, sub-family A (ABC1), member 7	481.761	490.405	0.98241	-0.0256027	0.936538	1
ENSMUSG00000035697	Arhgap45	Rho GTPase activating protein 45	573.933	825.548	0.695584	-0.523704	0.408066	1
ENSMUSG00000075706	Gpx4	glutathione peroxidase 4	170.602	217.664	0.784772	-0.349654	0.241011	1
ENSMUSG00000035673	Sbno2	strawberry notch homolog 2 (Drosophila)	1280.33	2035.47	0.629191	-0.66843	0.120117	1
ENSMUSG00000003068	Stk11	serine/threonine kinase 11	761.678	890.589	0.855415	-0.225304	0.387617	1
ENSMUSG00000035640	Cbarp	calcium channel, voltage-dependent, beta subunit associated regulatory protein	94.9061	129.318	0.73594	-0.442339	0.198648	1
ENSMUSG00000035621	Midn	midnolin	1635.85	1921.93	0.851225	-0.232387	0.280174	1
ENSMUSG00000045193	Cirbp	cold inducible RNA binding protein	152.38	173.265	0.880155	-0.184171	0.616799	1
ENSMUSG00000003070	Efna2	ephrin A2	4.51578	8.94007	0.554904	-0.849691	0.483219	1
ENSMUSG00000069565	Dazap1	DAZ associated protein 1	420.62	440.257	0.955497	-0.065676	0.793329	1
ENSMUSG00000020135	Apc2	adenomatosis polyposis coli 2	88.6588	93.5166	0.948603	-0.0761234	0.851416	1
ENSMUSG00000043822	Adamtsl5	ADAMTS-like 5	36.8483	66.609	0.559811	-0.836987	0.148159	1
ENSMUSG00000048696	Mex3d	mex3 RNA binding family member D	68.0356	97.4261	0.701395	-0.511701	0.293201	1
ENSMUSG00000035478	Mbd3	methyl-CpG binding domain protein 3	654.909	655.389	0.999268	-0.00105691	1	1
ENSMUSG00000003341	Atp8b3	ATPase, class I, type 8B, member 3	1.04123	6.379	0.276627	-1.85399	0.187597	1
ENSMUSG00000035370	Adat3	adenosine deaminase, tRNA-specific 3	6.04595	11.9376	0.54461	-0.876705	0.420059	1
ENSMUSG00000020190	Mknk2	MAP kinase-interacting serine/threonine kinase 2	1261.6	1470.58	0.857987	-0.220973	0.359217	1
ENSMUSG00000020198	Ap3d1	adaptor-related protein complex 3, delta 1 subunit	2549.72	2638.82	0.966248	-0.0495344	0.80214	1
ENSMUSG00000061589	Dot1l	DOT1-like, histone H3 methyltransferase (S. cerevisiae)	933.964	1179.85	0.791774	-0.336839	0.13864	1
ENSMUSG00000075558	Gm17151	predicted gene 17151	8.61735	14.0788	0.637806	-0.648809	0.522253	1
ENSMUSG00000035262	Amh	anti-Mullerian hormone	2.5714	3.43543	0.805197	-0.312586	0.970752	1
ENSMUSG00000051067	Lingo3	leucine rich repeat and Ig domain containing 3	6.04595	12.713	0.513815	-0.960679	0.347525	1
ENSMUSG00000035215	Lsm7	LSM7 homolog, U6 small nuclear RNA and mRNA degradation associated	4.13324	5.72287	0.763549	-0.389208	0.798033	1
ENSMUSG00000035206	Sppl2b	signal peptide peptidase like 2B	215.866	227.24	0.950167	-0.073747	0.826796	1
ENSMUSG00000059406	Tmprss9	transmembrane protease, serine 9	3.71902	19.366	0.231711	-2.1096	0.0356253	1
ENSMUSG00000015312	Gadd45b	growth arrest and DNA-damage-inducible 45 beta	737.288	865.172	0.852357	-0.23047	0.358023	1
ENSMUSG00000046822	Slc39a3	solute carrier family 39 (zinc transporter), member 3	200.696	228.3	0.879616	-0.185054	0.687923	1
ENSMUSG00000035041	Creb3l3	cAMP responsive element binding protein 3-like 3	5.14279	10.0142	0.557715	-0.8424	0.496498	1
ENSMUSG00000035011	Zbtb7a	zinc finger and BTB domain containing 7a	1266.58	1301.69	0.973049	-0.0394158	0.844964	1
ENSMUSG00000004934	Pias4	protein inhibitor of activated STAT 4	236.365	241.029	0.980726	-0.0280774	0.936375	1
ENSMUSG00000064441	Snord37	small nucleolar RNA, C/D box 37	7.22525	9.03003	0.820062	-0.286195	0.831522	1
ENSMUSG00000085779	Atcayos	ataxia, cerebellar, Cayman type, opposite strand	4.72858	15.7191	0.342637	-1.54525	0.147091	1
ENSMUSG00000004939	Nmrk2	nicotinamide riboside kinase 2	9.58385	12.0181	0.813009	-0.298657	0.740571	1
ENSMUSG00000034958	Atcay	ataxia, cerebellar, Cayman type	1.04123	12.2238	0.15436	-2.69563	0.0206101	1
ENSMUSG00000034949	Zfr2	zinc finger RNA binding protein 2	70.3309	98.8385	0.714463	-0.485069	0.271999	1
ENSMUSG00000004933	Matk	megakaryocyte-associated tyrosine kinase	50.7895	52.1868	0.973729	-0.0384078	0.85843	1
ENSMUSG00000034932	Mrpl54	mitochondrial ribosomal protein L54	254.862	288.931	0.882494	-0.180342	0.602057	1
ENSMUSG00000004931	Apba3	amyloid beta (A4) precursor protein-binding, family A, member 3	260.621	264.291	0.986163	-0.0201017	0.993458	1
ENSMUSG00000092781	Mir3057	microRNA 3057	1.53017	2.76443	0.672126	-0.573196	1	1
ENSMUSG00000034917	Tjp3	tight junction protein 3	199.347	214.152	0.931188	-0.102856	0.904178	1
ENSMUSG00000034902	Pip5k1c	phosphatidylinositol-4-phosphate 5-kinase, type 1 gamma	1402.18	1434.21	0.977684	-0.0325599	0.945062	1
ENSMUSG00000034889	Cactin	cactin, spliceosome C complex subunit	281.957	347.022	0.813042	-0.298598	0.304523	1
ENSMUSG00000034881	Tbxa2r	thromboxane A2 receptor	33.152	40.7484	0.818043	-0.289751	0.754226	1
ENSMUSG00000020232	Hmg20b	high mobility group 20B	431.553	437.445	0.986561	-0.0195193	0.900101	1
ENSMUSG00000020234	4930404N11Rik	RIKEN cDNA 4930404N11 gene	2.32693	4.47004	0.608209	-0.71736	0.690919	1
ENSMUSG00000020235	Fzr1	fizzy/cell division cycle 20 related 1 (Drosophila)	276.785	295.004	0.938451	-0.0916462	0.92875	1
ENSMUSG00000078440	Dohh	deoxyhypusine hydroxylase/monooxygenase	190.376	203.633	0.935217	-0.0966264	0.823641	1
ENSMUSG00000055053	Nfic	nuclear factor I/C	2047.1	2061.4	0.993067	-0.0100364	0.966361	1
ENSMUSG00000085327	Gm16104	predicted gene 16104	5.80148	5.93166	0.98122	-0.0273518	1	1
ENSMUSG00000034818	Celf5	CUGBP, Elav-like family member 5	2.84754	7.18993	0.469789	-1.08991	0.405101	1
ENSMUSG00000044199	S1pr4	sphingosine-1-phosphate receptor 4	11.9855	13.7264	0.881784	-0.181503	0.931444	1
ENSMUSG00000034771	Tle2	transducin-like enhancer of split 2	246.958	267.44	0.923699	-0.114505	0.681329	1
ENSMUSG00000034758	Tle6	transducin-like enhancer of split 6	15.2586	27.1256	0.578072	-0.790679	0.342856	1
ENSMUSG00000061371	Zfp873	zinc finger protein 873	22.1013	35.2457	0.637355	-0.649831	0.398762	1
ENSMUSG00000078435	AU041133	expressed sequence AU041133	13.5473	14.5319	0.936611	-0.0944781	0.995881	1
ENSMUSG00000062931	Zfp938	zinc finger protein 938	35.574	53.4461	0.671746	-0.574012	0.302266	1
ENSMUSG00000034674	Tdg	thymine DNA glycosylase	63.6896	70.4618	0.905233	-0.143638	0.822752	1
ENSMUSG00000020251	Glt8d2	glycosyltransferase 8 domain containing 2	7.92699	11.3499	0.722839	-0.468254	0.772317	1
ENSMUSG00000020246	Hcfc2	host cell factor C2	173.078	189.154	0.915457	-0.127436	0.689647	1
ENSMUSG00000020248	Nfyb	nuclear transcription factor-Y beta	362.594	411.076	0.882347	-0.180582	0.557922	1
ENSMUSG00000090200	1700025N21Rik	RIKEN cDNA 1700025N21 gene	0.382542	6.42353	0.186238	-2.42478	0.130055	1
ENSMUSG00000034591	Slc41a2	solute carrier family 41, member 2	119.452	155.909	0.767656	-0.381468	0.325379	1
ENSMUSG00000020255	D10Wsu102e	DNA segment, Chr 10, Wayne State University 102, expressed	201.968	223.325	0.904793	-0.14434	0.588179	1
ENSMUSG00000020256	Aldh1l2	aldehyde dehydrogenase 1 family, member L2	38.8154	59.3382	0.659871	-0.599745	0.303941	1
ENSMUSG00000034560	Washc4	WASH complex subunit 4	850.464	869.339	0.978313	-0.0316321	0.988799	1
ENSMUSG00000020032	Nuak1	NUAK family, SNF1-like kinase, 1	428.857	488.789	0.877637	-0.188304	0.498042	1
ENSMUSG00000046841	Ckap4	cytoskeleton-associated protein 4	237.426	299.871	0.792454	-0.335601	0.261643	1
ENSMUSG00000020034	Tcp11l2	t-complex 11 (mouse) like 2	220.945	269.445	0.820668	-0.28513	0.344261	1
ENSMUSG00000034453	Polr3b	polymerase (RNA) III (DNA directed) polypeptide B	294.232	312.83	0.94074	-0.0881319	0.818539	1
ENSMUSG00000049038	Mterf2	mitochondrial transcription termination factor 2	57.3675	75.9384	0.758626	-0.39854	0.405741	1
ENSMUSG00000020038	Cry1	cryptochrome 1 (photolyase-like)	46.7944	66.2362	0.710843	-0.492397	0.285953	1
ENSMUSG00000020042	Btbd11	BTB (POZ) domain containing 11	81.0713	145.668	0.559573	-0.837601	0.0307159	1
ENSMUSG00000035529	Prdm4	PR domain containing 4	232.508	236.234	0.984294	-0.0228388	0.969246	1
ENSMUSG00000085111	Ascl4	achaete-scute family bHLH transcription factor 4	5.63173	9.85896	0.610716	-0.711428	0.640878	1
ENSMUSG00000001786	Fbxo7	F-box protein 7	590.574	736.048	0.802627	-0.317199	0.359028	1
ENSMUSG00000077265	Gm24430	predicted gene, 24430	2.32693	9.06868	0.330423	-1.59761	0.239205	1
ENSMUSG00000059602	Syn3	synapsin III	239.454	324.371	0.739016	-0.436323	0.116779	1
ENSMUSG00000020048	Hsp90b1	heat shock protein 90, beta (Grp94), member 1	6060.31	7423.75	0.816366	-0.292713	0.186686	1
ENSMUSG00000044937	Ttc41	tetratricopeptide repeat domain 41	53.1798	57.4963	0.926209	-0.110591	0.761733	1
ENSMUSG00000056366	Fabp3-ps1	fatty acid binding protein 3, muscle and heart, pseudogene 1	838.924	870.753	0.963488	-0.0536609	0.978129	1
ENSMUSG00000054027	Nt5dc3	5'-nucleotidase domain containing 3	282.776	283.26	0.998299	-0.00245542	0.949397	1
ENSMUSG00000089959	Gm16268	predicted gene 16268	3.33648	4.03758	0.860826	-0.216206	1	1
ENSMUSG00000087429	Gm16235	predicted gene 16235	2.6778	3.7455	0.775007	-0.36772	0.986526	1
ENSMUSG00000060002	Chpt1	choline phosphotransferase 1	4416.52	4645.61	0.950696	-0.0729444	0.859353	1
ENSMUSG00000020059	Sycp3	synaptonemal complex protein 3	15.2473	20.6607	0.750081	-0.414882	0.566859	1
ENSMUSG00000069540	Gm4925	predicted gene 4925	3.36815	8.2101	0.474279	-1.07619	0.369311	1
ENSMUSG00000060904	Arl1	ADP-ribosylation factor-like 1	369.543	385.131	0.959629	-0.0594516	0.818198	1
ENSMUSG00000020062	Slc5a8	solute carrier family 5 (iodide transporter), member 8	533.865	813.555	0.656635	-0.606837	0.0250521	1
ENSMUSG00000074802	Gas2l3	growth arrest-specific 2 like 3	37.8692	45.5665	0.834703	-0.260664	0.635432	1
ENSMUSG00000047638	Nr1h4	nuclear receptor subfamily 1, group H, member 4	656.142	813.282	0.807021	-0.309322	0.341621	1
ENSMUSG00000019935	Slc17a8	solute carrier family 17 (sodium-dependent inorganic phosphate cotransporter), member 8	3.09201	3.5727	0.894879	-0.160236	0.987227	1
ENSMUSG00000019951	Uhrf1bp1l	UHRF1 (ICBP90) binding protein 1-like	1298.31	1415.11	0.917519	-0.12419	0.697705	1
ENSMUSG00000058589	Anks1b	ankyrin repeat and sterile alpha motif domain containing 1B	13.6854	15.5364	0.888066	-0.171261	0.86301	1
ENSMUSG00000019979	Apaf1	apoptotic peptidase activating factor 1	188.219	215.744	0.873006	-0.195937	0.462866	1
ENSMUSG00000019975	Ikbip	IKBKB interacting protein	215.443	220.996	0.974985	-0.0365482	0.976276	1
ENSMUSG00000020015	Cdk17	cyclin-dependent kinase 17	371.734	427.337	0.870189	-0.200599	0.529605	1
ENSMUSG00000089214	Mir1931	microRNA 1931	4.93	5.18602	0.958612	-0.0609806	0.921979	1
ENSMUSG00000020019	Ntn4	netrin 4	1585.97	1643.65	0.964924	-0.0515125	0.799201	1
ENSMUSG00000085723	Gm15915	predicted gene 15915	10.0411	14.5883	0.708295	-0.497579	0.660878	1
ENSMUSG00000086891	Gm15963	predicted gene 15963	1.94438	7.52744	0.345284	-1.53415	0.567346	1
ENSMUSG00000036112	Metap2	methionine aminopeptidase 2	1225.27	1226.21	0.999234	-0.00110507	0.968859	1
ENSMUSG00000036099	Vezt	vezatin, adherens junctions transmembrane protein	290.244	339.941	0.854234	-0.227296	0.373602	1
ENSMUSG00000020023	Tmcc3	transmembrane and coiled coil domains 3	643.064	701.567	0.916729	-0.125433	0.601224	1
ENSMUSG00000085409	Gm16155	predicted gene 16155	8.16008	10.727	0.781112	-0.356399	0.769171	1
ENSMUSG00000020024	Cep83	centrosomal protein 83	278.577	307.92	0.905015	-0.143987	0.661873	1
ENSMUSG00000074785	Plxnc1	plexin C1	115.776	154.704	0.749989	-0.415058	0.569687	1
ENSMUSG00000074781	Ube2n	ubiquitin-conjugating enzyme E2N	233.739	276.205	0.846806	-0.239897	0.411159	1
ENSMUSG00000020029	Nudt4	nudix (nucleoside diphosphate linked moiety X)-type motif 4	9418.25	10023.2	0.939647	-0.0898097	0.82594	1
ENSMUSG00000092867	Mir3058	microRNA 3058	15.4601	15.7047	0.985357	-0.0212818	1	1
ENSMUSG00000074780	Anapc15-ps	anaphase prompoting complex C subunit 15, pseudogene	59.7894	61.4407	0.973554	-0.038667	0.970189	1
ENSMUSG00000036499	Eea1	early endosome antigen 1	1981.07	2000.24	0.990424	-0.0138822	0.915512	1
ENSMUSG00000036478	Btg1	B cell translocation gene 1, anti-proliferative	2072.99	2454.66	0.844576	-0.243701	0.517026	1
ENSMUSG00000019929	Dcn	decorin	362.875	702.482	0.517248	-0.951072	0.363753	1
ENSMUSG00000036446	Lum	lumican	77.1736	118.361	0.654933	-0.61058	0.689019	1
ENSMUSG00000019943	Atp2b1	ATPase, Ca++ transporting, plasma membrane 1	1880.73	1997.64	0.941503	-0.0869621	0.631462	1
ENSMUSG00000019952	Poc1b	POC1 centriolar protein B	107.116	145.84	0.736283	-0.441668	0.308956	1
ENSMUSG00000090665	Gad1-ps	glutamate decarboxylase 1, pseudogene	0.903156	15.1072	0.118156	-3.08124	0.0487514	1
ENSMUSG00000046934	Csl	citrate synthase like	26.9249	40.3127	0.67594	-0.565032	0.488457	1
ENSMUSG00000019888	Mgat4c	MGAT4 family, member C	6.46017	8.621	0.775404	-0.36698	0.757488	1
ENSMUSG00000044921	Rassf9	Ras association (RalGDS/AF-6) domain family (N-terminal) member 9	127.635	135.759	0.940597	-0.0883508	1	1
ENSMUSG00000019894	Slc6a15	solute carrier family 6 (neurotransmitter transporter), member 15	85.4401	154.684	0.555229	-0.848846	0.168127	1
ENSMUSG00000084399	Gm15666	predicted gene 15666	9.79665	12.358	0.808256	-0.307116	0.732342	1
ENSMUSG00000036009	Mettl25	methyltransferase like 25	42.0138	50.1207	0.841417	-0.249108	0.659675	1
ENSMUSG00000019897	Ccdc59	coiled-coil domain containing 59	366.154	394.83	0.927556	-0.108494	0.665811	1
ENSMUSG00000053825	Ppfia2	protein tyrosine phosphatase, receptor type, f polypeptide (PTPRF), interacting protein (liprin), alpha 2	4.72858	6.49194	0.764633	-0.387161	0.952361	1
ENSMUSG00000091455	Otogl	otogelin-like	1.91271	2.57052	0.815766	-0.293772	1	1
ENSMUSG00000019907	Ppp1r12a	protein phosphatase 1, regulatory (inhibitor) subunit 12A	2282.75	3129.45	0.72953	-0.454962	0.0905528	1
ENSMUSG00000035873	Pawr	PRKC, apoptosis, WT1, regulator	788.424	872.73	0.90351	-0.146388	0.624065	1
ENSMUSG00000091086	Rpl6l	ribosomal protein L6-like	310.829	320.201	0.970823	-0.0427205	0.934539	1
ENSMUSG00000035759	Bbs10	Bardet-Biedl syndrome 10 (human)	18.7649	36.2183	0.531052	-0.913074	0.158791	1
ENSMUSG00000058799	Nap1l1	nucleosome assembly protein 1-like 1	466.566	466.651	0.999818	-0.000262271	0.982655	1
ENSMUSG00000020205	Phlda1	pleckstrin homology like domain, family A, member 1	432.657	458.506	0.943746	-0.0835293	0.732222	1
ENSMUSG00000056888	Glipr1	GLI pathogenesis-related 1 (glioma)	63.4882	76.3705	0.833498	-0.26275	0.783873	1
ENSMUSG00000035694	Caps2	calcyphosphine 2	1.42377	7.18993	0.295945	-1.7566	0.205659	1
ENSMUSG00000020130	Tbc1d15	TBC1 domain family, member 15	558.676	565.648	0.987696	-0.017861	0.961065	1
ENSMUSG00000020137	Thap2	THAP domain containing, apoptosis associated protein 2	123.096	132.638	0.928598	-0.106873	0.774772	1
ENSMUSG00000034163	Zfc3h1	zinc finger, C3H1-type containing	1188.6	1491.99	0.796789	-0.32773	0.140091	1
ENSMUSG00000092210	A930009A15Rik	RIKEN cDNA A930009A15 gene	3.06034	7.33619	0.487073	-1.03779	0.510739	1
ENSMUSG00000054934	Kcnmb4	potassium large conductance calcium-activated channel, subfamily M, beta member 4	3.99517	4.47315	0.912668	-0.131837	1	1
ENSMUSG00000085837	Kcnmb4os2	potassium large conductance calcium-activated channel, subfamily M, beta member 4, opposite strand 2	1.14763	4.53889	0.387736	-1.36685	0.462768	1
ENSMUSG00000093404	Gm25190	predicted gene, 25190	3.8571	4.78322	0.839861	-0.251778	1	1
ENSMUSG00000052291	5330438D12Rik	RIKEN cDNA 5330438D12 gene	10.8695	13.3781	0.825528	-0.276611	0.682888	1
ENSMUSG00000020169	Best3	bestrophin 3	23.8013	32.3143	0.744463	-0.425729	0.570778	1
ENSMUSG00000060187	Lrrc10	leucine rich repeat containing 10	0.765084	2.98809	0.442588	-1.17596	0.692966	1
ENSMUSG00000020170	Frs2	fibroblast growth factor receptor substrate 2	529.309	539.936	0.980354	-0.0286256	0.907153	1
ENSMUSG00000069516	Lyz2	lysozyme 2	1822.97	1830.06	0.996129	-0.00559547	0.991769	1
ENSMUSG00000055531	Cpsf6	cleavage and polyadenylation specific factor 6	663.868	727.719	0.912378	-0.132296	0.557921	1
ENSMUSG00000020183	Cpm	carboxypeptidase M	177.752	274.409	0.649042	-0.623616	0.0339633	1
ENSMUSG00000020184	Mdm2	transformed mouse 3T3 cell double minute 2	889.691	959.547	0.927275	-0.10893	0.579829	1
ENSMUSG00000052681	Rap1b	RAS related protein 1b	1044.14	1131.24	0.923072	-0.115485	0.585261	1
ENSMUSG00000020212	Mdm1	transformed mouse 3T3 cell double minute 1	103.822	104.034	0.997989	-0.00290386	0.957767	1
ENSMUSG00000028630	Dyrk2	dual-specificity tyrosine-(Y)-phosphorylation regulated kinase 2	271.395	324.236	0.837531	-0.255786	0.309716	1
ENSMUSG00000020228	Helb	helicase (DNA) B	270.642	324.782	0.833815	-0.262201	0.383736	1
ENSMUSG00000020227	Irak3	interleukin-1 receptor-associated kinase 3	62.8498	79.2577	0.79556	-0.329958	0.568929	1
ENSMUSG00000056758	Hmga2	high mobility group AT-hook 2	1.04123	8.60301	0.212561	-2.23405	0.218654	1
ENSMUSG00000051236	Msrb3	methionine sulfoxide reductase B3	408.105	583.121	0.700377	-0.513796	0.137846	1
ENSMUSG00000086444	Gm15961	predicted gene 15961	2.29525	4.7117	0.576931	-0.79353	0.727287	1
ENSMUSG00000087480	Gm15910	predicted gene 15910	27.3708	56.3658	0.49456	-1.01578	0.295122	1
ENSMUSG00000086522	Gm4473	predicted gene 4473	0.765084	3.19377	0.420882	-1.24851	0.625455	1
ENSMUSG00000082936	Gm16166	predicted gene 16166	5.80148	10.0561	0.61518	-0.70092	0.518236	1
ENSMUSG00000020218	Wif1	Wnt inhibitory factor 1	2.6778	2.87159	0.949943	-0.0740868	1	1
ENSMUSG00000020115	Tbk1	TANK-binding kinase 1	568.165	582.193	0.975946	-0.0351271	0.852	1
ENSMUSG00000034667	Xpot	exportin, tRNA (nuclear export receptor for tRNAs)	634.236	668.572	0.948719	-0.0759469	0.793746	1
ENSMUSG00000053684	BC048403	cDNA sequence BC048403	61.6274	75.0374	0.823639	-0.279915	0.538851	1
ENSMUSG00000020121	Srgap1	SLIT-ROBO Rho GTPase activating protein 1	186.179	201.421	0.924701	-0.112941	0.677087	1
ENSMUSG00000034620	Tmem5	transmembrane protein 5	171.835	200.094	0.859474	-0.218475	0.558981	1
ENSMUSG00000020123	Avpr1a	arginine vasopressin receptor 1A	154.999	161.614	0.959323	-0.0599111	0.922165	1
ENSMUSG00000034602	Mon2	MON2 homolog, regulator of endosome to Golgi trafficking	1108.78	1136.38	0.975737	-0.0354358	0.860373	1
ENSMUSG00000020124	Usp15	ubiquitin specific peptidase 15	718.336	771.542	0.931129	-0.102947	0.71915	1
ENSMUSG00000020105	Lrig3	leucine-rich repeats and immunoglobulin-like domains 3	157.831	185.094	0.853496	-0.228544	0.43945	1
ENSMUSG00000025432	Avil	advillin	27.647	39.1496	0.713505	-0.487004	0.363927	1
ENSMUSG00000080115	Eef1akmt3	EEF1A lysine methyltransferase 3	33.0773	44.8073	0.743927	-0.426768	0.43161	1
ENSMUSG00000006732	Mettl1	methyltransferase like 1	129.068	145.056	0.890531	-0.167262	0.662168	1
ENSMUSG00000025422	Agap2	ArfGAP with GTPase domain, ankyrin repeat and PH domain 2	61.5007	71.7185	0.859489	-0.218449	0.771336	1
ENSMUSG00000019467	Arhgef25	Rho guanine nucleotide exchange factor (GEF) 25	66.983	113.697	0.592718	-0.754581	0.0611389	1
ENSMUSG00000040415	Dtx3	deltex 3, E3 ubiquitin ligase	346.803	388.356	0.893279	-0.162818	0.509624	1
ENSMUSG00000025417	Pip4k2c	phosphatidylinositol-5-phosphate 4-kinase, type II, gamma	1254.35	1327.96	0.944607	-0.0822145	0.836144	1
ENSMUSG00000074657	Kif5a	kinesin family member 5A	26.0965	29.81	0.879472	-0.185291	0.833035	1
ENSMUSG00000025409	Mbd6	methyl-CpG binding domain protein 6	566.997	570.318	0.994186	-0.00841172	1	1
ENSMUSG00000092384	Gm4189	predicted gene 4189	3.8571	9.22394	0.475071	-1.07379	0.453197	1
ENSMUSG00000025408	Ddit3	DNA-damage inducible transcript 3	565.573	596.856	0.947674	-0.0775367	0.788383	1
ENSMUSG00000040354	Mars	methionine-tRNA synthetase	349.395	420.3	0.8317	-0.265866	0.285805	1
ENSMUSG00000025407	Gli1	GLI-Kruppel family member GLI1	16.9155	29.72	0.583186	-0.777971	0.225922	1
ENSMUSG00000040287	Stac3	SH3 and cysteine rich domain 3	11.0823	11.8211	0.942379	-0.0856207	0.902789	1
ENSMUSG00000040280	Ndufa4l2	NADH dehydrogenase (ubiquinone) 1 alpha subcomplex, 4-like 2	22.7284	32.7824	0.702388	-0.50966	0.474891	1
ENSMUSG00000040258	Nxph4	neurexophilin 4	2.95394	5.88079	0.574634	-0.799284	0.695602	1
ENSMUSG00000040249	Lrp1	low density lipoprotein receptor-related protein 1	1835.47	2834.25	0.647728	-0.62654	0.0683858	1
ENSMUSG00000002147	Stat6	signal transducer and activator of transcription 6	1257.3	1327.07	0.947468	-0.0778515	0.749587	1
ENSMUSG00000040195	Nemp1	nuclear envelope integral membrane protein 1	72.6261	75.7454	0.959355	-0.0598626	0.994951	1
ENSMUSG00000090036	Gm15900	predicted gene 15900	22.76	27.2688	0.840504	-0.250673	0.752602	1
ENSMUSG00000061315	Naca	nascent polypeptide-associated complex alpha polypeptide	398.634	406.456	0.980801	-0.0279671	0.833336	1
ENSMUSG00000071072	Ptges3	prostaglandin E synthase 3	372.071	503.449	0.739562	-0.435256	0.0972803	1
ENSMUSG00000040054	Baz2a	bromodomain adjacent to zinc finger domain, 2A	1810.09	1997.3	0.906312	-0.141921	0.502532	1
ENSMUSG00000039994	Timeless	timeless circadian clock 1	318.785	326.32	0.976981	-0.0335978	0.878009	1
ENSMUSG00000051716	Apon	apolipoprotein N	3.23008	5.70488	0.630896	-0.664525	0.648888	1
ENSMUSG00000025383	Il23a	interleukin 23, alpha subunit p19	3.12368	6.01495	0.587842	-0.766499	0.522821	1
ENSMUSG00000005682	Pan2	PAN2 poly(A) specific ribonuclease subunit	328.91	363.321	0.905546	-0.14314	0.579487	1
ENSMUSG00000005683	Cs	citrate synthase	2004.87	2006.31	0.999283	-0.0010344	0.911953	1
ENSMUSG00000090761	Gm17201	predicted gene 17201	17.6489	18.7936	0.942169	-0.0859422	0.950189	1
ENSMUSG00000025373	Rnf41	ring finger protein 41	291.84	300.209	0.972214	-0.0406538	0.860736	1
ENSMUSG00000088151	Gm26347	predicted gene, 26347	0.382542	3.46242	0.309819	-1.6905	0.424378	1
ENSMUSG00000090841	Myl6	myosin, light polypeptide 6, alkali, smooth muscle and non-muscle	445.528	487.82	0.913482	-0.130552	0.599005	1
ENSMUSG00000039824	Myl6b	myosin, light polypeptide 6B	41.131	52.9839	0.780436	-0.357647	0.546679	1
ENSMUSG00000025366	Esyt1	extended synaptotagmin-like protein 1	713.506	737.535	0.967464	-0.04772	0.896458	1
ENSMUSG00000018166	Erbb3	erb-b2 receptor tyrosine kinase 3	1022.13	1172.77	0.871663	-0.198158	0.639333	1
ENSMUSG00000002578	Ikzf4	IKAROS family zinc finger 4	82.2189	85.4951	0.962123	-0.0557073	0.810637	1
ENSMUSG00000025358	Cdk2	cyclin-dependent kinase 2	107.093	143.474	0.748185	-0.418534	0.224754	1
ENSMUSG00000025359	Pmel	premelanosome protein	6.46017	18.2509	0.387524	-1.36764	0.124441	1
ENSMUSG00000025357	Dgka	diacylglycerol kinase, alpha	277.964	326.178	0.852639	-0.229993	0.430055	1
ENSMUSG00000025355	Mmp19	matrix metallopeptidase 19	8.06506	15.9963	0.533355	-0.906832	0.399286	1
ENSMUSG00000025354	Dnajc14	DnaJ heat shock protein family (Hsp40) member C14	559.369	579.628	0.965108	-0.051238	0.921693	1
ENSMUSG00000078427	Sarnp	SAP domain containing ribonucleoprotein	28.3487	38.0994	0.750619	-0.413848	0.474472	1
ENSMUSG00000025352	Gdf11	growth differentiation factor 11	119.389	202.567	0.591397	-0.757801	0.036258	1
ENSMUSG00000025350	Rdh5	retinol dehydrogenase 5	103.935	112.717	0.922778	-0.115945	0.684545	1
ENSMUSG00000090247	Bloc1s1	biogenesis of lysosomal organelles complex-1, subunit 1	68.5335	70.0423	0.978761	-0.0309711	0.895915	1
ENSMUSG00000025348	Itga7	integrin alpha 7	84.9081	251.246	0.340573	-1.55397	0.0191998	1
ENSMUSG00000034833	Tespa1	thymocyte expressed, positive selection associated 1	9.24436	28.8335	0.343385	-1.5421	0.162989	1
ENSMUSG00000040540	Gm9770	predicted gene 9770	269.612	277.903	0.970271	-0.0435408	0.983152	1
ENSMUSG00000023764	Sfi1	Sfi1 homolog, spindle assembly associated (yeast)	534.524	560.195	0.954256	-0.0675518	0.817677	1
ENSMUSG00000087111	Gm11399	predicted gene 11399	9.58385	13.0586	0.752837	-0.40959	0.608335	1
ENSMUSG00000082658	Fau-ps2	Finkel-Biskis-Reilly murine sarcoma virus (FBR-MuSV) ubiquitously expressed (fox derived), pseudogene 2	2.465	5.29619	0.550333	-0.861624	0.795163	1
ENSMUSG00000053263	Gm12592	predicted gene 12592	13.9299	23.5557	0.608001	-0.717855	0.328841	1
ENSMUSG00000034614	Pik3ip1	phosphoinositide-3-kinase interacting protein 1	140.098	208.977	0.67197	-0.57353	0.11248	1
ENSMUSG00000020448	Rnf185	ring finger protein 185	254.853	291.267	0.875409	-0.19197	0.58466	1
ENSMUSG00000034587	8430429K09Rik	RIKEN cDNA 8430429K09 gene	43.2882	65.3215	0.66778	-0.582556	0.263601	1
ENSMUSG00000081059	Gm11945	predicted gene 11945	39.5375	56.3501	0.706842	-0.500541	0.366175	1
ENSMUSG00000034570	Inpp5j	inositol polyphosphate 5-phosphatase J	323.534	445.113	0.727471	-0.459039	0.189479	1
ENSMUSG00000075702	Selenom	selenoprotein M	195.34	222.506	0.878456	-0.186958	0.690998	1
ENSMUSG00000020439	Smtn	smoothelin	1256.52	1319.55	0.952269	-0.070559	0.686592	1
ENSMUSG00000056579	Tug1	taurine upregulated gene 1	717.256	780.56	0.919004	-0.121857	0.662399	1
ENSMUSG00000020435	Osbp2	oxysterol binding protein 2	41.5566	220.964	0.191727	-2.38287	0.0166753	1
ENSMUSG00000084077	Gm11952	predicted gene 11952	10.8062	17.4187	0.64099	-0.641627	0.566797	1
ENSMUSG00000020434	4921536K21Rik	RIKEN cDNA 4921536K21 gene	17.9251	28.4526	0.642559	-0.6381	0.402501	1
ENSMUSG00000047205	Dusp18	dual specificity phosphatase 18	167.34	227.222	0.737615	-0.439061	0.158876	1
ENSMUSG00000048807	Slc35e4	solute carrier family 35, member E4	140.191	145.81	0.961727	-0.056301	0.746889	1
ENSMUSG00000020430	Pes1	pescadillo ribosomal biogenesis factor 1	196.839	226.364	0.870138	-0.200683	0.58191	1
ENSMUSG00000019368	Sec14l4	SEC14-like lipid binding 4	4.59051	4.85796	0.954344	-0.0674194	1	1
ENSMUSG00000003585	Sec14l2	SEC14-like lipid binding 2	24.7994	38.8642	0.647183	-0.627755	0.34615	1
ENSMUSG00000051427	Ccdc157	coiled-coil domain containing 157	203.446	257.591	0.790614	-0.338955	0.264258	1
ENSMUSG00000020424	Gatsl3	GATS protein-like 3	75.4623	110.871	0.683487	-0.549015	0.180597	1
ENSMUSG00000081974	Gm11960	predicted gene 11960	11.5713	38.3994	0.319073	-1.64804	0.152577	1
ENSMUSG00000020412	Ascc2	activating signal cointegrator 1 complex subunit 2	533.299	552.43	0.965432	-0.0507528	0.766635	1
ENSMUSG00000009075	Cabp7	calcium binding protein 7	0.765084	6.45329	0.236819	-2.07814	0.175362	1
ENSMUSG00000009073	Nf2	neurofibromin 2	1091.12	1197.19	0.911471	-0.133732	0.575967	1
ENSMUSG00000020396	Nefh	neurofilament, heavy polypeptide	4.51578	4.61941	0.981559	-0.0268532	1	1
ENSMUSG00000088634	Gm24958	predicted gene, 24958	0.765084	4.06457	0.348516	-1.5207	0.449148	1
ENSMUSG00000034201	Gas2l1	growth arrest-specific 2 like 1	264.668	269.622	0.981694	-0.0266544	0.874405	1
ENSMUSG00000009079	Ewsr1	Ewing sarcoma breakpoint region 1	1245.72	1329.21	0.93723	-0.0935245	0.629129	1
ENSMUSG00000085232	Gm11962	predicted gene 11962	0.765084	2.95256	0.446567	-1.16305	0.759002	1
ENSMUSG00000020484	Xbp1	X-box binding protein 1	922.241	1059.43	0.870633	-0.199864	0.495222	1
ENSMUSG00000049680	Urgcp	upregulator of cell proliferation	428.558	434.535	0.986278	-0.0199332	1	1
ENSMUSG00000020475	Pgam2	phosphoglycerate mutase 2	727.265	913.636	0.796235	-0.328734	0.59167	1
ENSMUSG00000020474	Polm	polymerase (DNA directed), mu	74.962	95.9229	0.783736	-0.35156	0.353633	1
ENSMUSG00000020473	Aebp1	AE binding protein 1	1029.71	1107.32	0.929977	-0.104734	0.910802	1
ENSMUSG00000002741	Ykt6	YKT6 v-SNARE homolog (S. cerevisiae)	272.425	332.857	0.818989	-0.288085	0.32279	1
ENSMUSG00000057897	Camk2b	calcium/calmodulin-dependent protein kinase II, beta	33.2357	46.8648	0.715258	-0.483464	0.289838	1
ENSMUSG00000053838	Nudcd3	NudC domain containing 3	1082.62	1124.82	0.962516	-0.0551182	0.868336	1
ENSMUSG00000020447	Npc1l1	NPC1-like 1	0	4.42861	0.184209	-2.44058	0.151197	1
ENSMUSG00000004393	Ddx56	DEAD (Asp-Glu-Ala-Asp) box polypeptide 56	132.893	145.078	0.916584	-0.125661	0.78874	1
ENSMUSG00000020456	Ogdh	oxoglutarate (alpha-ketoglutarate) dehydrogenase (lipoamide)	6263.7	6274.33	0.998305	-0.00244708	0.920059	1
ENSMUSG00000041164	Zmiz2	zinc finger, MIZ-type containing 2	1342.33	1409.69	0.952251	-0.070586	0.813697	1
ENSMUSG00000020437	Myo1g	myosin IG	422.403	482.598	0.875528	-0.191775	0.69353	1
ENSMUSG00000000378	Ccm2	cerebral cavernous malformation 2	181.824	223.223	0.815369	-0.294475	0.45453	1
ENSMUSG00000041073	Nacad	NAC alpha domain containing	75.8537	78.2903	0.969271	-0.0450285	0.809825	1
ENSMUSG00000064495	Gm24313	predicted gene, 24313	2.29525	2.33197	0.98898	-0.0159862	0.897792	1
ENSMUSG00000000381	Wap	whey acidic protein	1.42377	4.49702	0.440924	-1.1814	0.496473	1
ENSMUSG00000020431	Adcy1	adenylate cyclase 1	367.078	523.525	0.701736	-0.511	0.075447	1
ENSMUSG00000020429	Igfbp1	insulin-like growth factor binding protein 1	117.526	117.562	0.999694	-0.000441284	0.984197	1
ENSMUSG00000020422	Tns3	tensin 3	2838.62	2883.66	0.984385	-0.0227048	0.948173	1
ENSMUSG00000046634	Pkd1l1	polycystic kidney disease 1 like 1	4.79193	9.46837	0.553278	-0.853922	0.418543	1
ENSMUSG00000020413	Hus1	HUS1 checkpoint clamp component	179.251	191.567	0.936042	-0.0953554	0.793702	1
ENSMUSG00000040985	Sun3	Sad1 and UNC84 domain containing 3	8.75542	12.6657	0.713861	-0.486284	0.696428	1
ENSMUSG00000004668	Abca13	ATP-binding cassette, sub-family A (ABC1), member 13	8445.55	11171.4	0.756017	-0.40351	0.585845	1
ENSMUSG00000081325	Gm12599	predicted gene 12599	22.0583	25.4102	0.873082	-0.195812	0.768822	1
ENSMUSG00000018654	Ikzf1	IKAROS family zinc finger 1	345.119	376.434	0.917033	-0.124954	0.888131	1
ENSMUSG00000086584	Gm12002	predicted gene 12002	10.5301	17.359	0.628034	-0.671084	0.492113	1
ENSMUSG00000085452	4930554G24Rik	RIKEN cDNA 4930554G24 gene	2.18885	5.4038	0.497963	-1.00589	0.537794	1
ENSMUSG00000081631	Gm12005	predicted gene 12005	6.94911	7.69391	0.914331	-0.129212	1	1
ENSMUSG00000048834	Vstm2a	V-set and transmembrane domain containing 2A	100.506	159.972	0.630583	-0.665241	0.350281	1
ENSMUSG00000078974	Sec61g	SEC61, gamma subunit	22.9298	38.8428	0.600605	-0.735512	0.205648	1
ENSMUSG00000087060	Eldr	Egfr long non-coding downstream RNA	1.80631	8.51661	0.294886	-1.76177	0.238495	1
ENSMUSG00000044966	Fbxo48	F-box protein 48	21.0804	23.0603	0.917712	-0.123886	0.798067	1
ENSMUSG00000020120	Plek	pleckstrin	1346.23	1719.53	0.78303	-0.35286	0.59287	1
ENSMUSG00000044629	Cnrip1	cannabinoid receptor interacting protein 1	28.9238	31.7244	0.914418	-0.129075	1	1
ENSMUSG00000020116	Pno1	partner of NOB1 homolog	202.672	217.381	0.932645	-0.100601	0.817511	1
ENSMUSG00000000581	C1d	C1D nuclear receptor co-repressor	156.194	157.228	0.993464	-0.00946053	0.972846	1
ENSMUSG00000016984	Etaa1	Ewing tumor-associated antigen 1	149.956	176.76	0.84921	-0.235808	0.435254	1
ENSMUSG00000086468	Etaa1os	Ewing tumor-associated antigen 1, opposite strand	2.84754	9.58165	0.363605	-1.45956	0.544358	1
ENSMUSG00000085743	8430419K02Rik	RIKEN cDNA 8430419K02 gene	0	5.99418	0.142976	-2.80616	0.077592	1
ENSMUSG00000020160	Meis1	Meis homeobox 1	92.5475	146.537	0.634061	-0.657306	0.160981	1
ENSMUSG00000045671	Spred2	sprouty-related, EVH1 domain containing 2	560.867	564.863	0.992939	-0.0102237	0.973982	1
ENSMUSG00000020152	Actr2	ARP2 actin-related protein 2	1730.39	1888.29	0.916419	-0.12592	0.630005	1
ENSMUSG00000020142	Slc1a4	solute carrier family 1 (glutamate/neutral amino acid transporter), member 4	53.6801	65.1763	0.82628	-0.275297	0.662846	1
ENSMUSG00000083555	Gm12035	predicted gene 12035	4.10157	8.37668	0.544069	-0.878138	0.550152	1
ENSMUSG00000049659	Aftph	aftiphilin	1199.56	1232.34	0.973416	-0.0388712	0.938708	1
ENSMUSG00000042363	Lgalsl	lectin, galactoside binding-like	156.11	217.134	0.720247	-0.473437	0.146974	1
ENSMUSG00000020134	Peli1	pellino 1	593.888	712.173	0.834143	-0.261634	0.270524	1
ENSMUSG00000084362	2610024D14Rik	RIKEN cDNA 2610024D14 gene	5.24919	6.99014	0.782113	-0.354551	0.869198	1
ENSMUSG00000020128	Vps54	VPS54 GARP complex subunit	969.029	1082.23	0.895498	-0.159237	0.598983	1
ENSMUSG00000089155	Gm23582	predicted gene, 23582	2.6778	3.43543	0.829185	-0.270233	1	1
ENSMUSG00000081868	Gm12039	predicted gene 12039	7.33165	7.36318	0.99623	-0.00544994	1	1
ENSMUSG00000020319	Wdpcp	WD repeat containing planar cell polarity effector	148.468	150.861	0.984246	-0.0229092	0.997915	1
ENSMUSG00000042302	Ehbp1	EH domain binding protein 1	379.88	415.783	0.913857	-0.12996	0.573693	1
ENSMUSG00000092455	Gm20456	predicted gene 20456	18.8396	22.0981	0.858928	-0.219392	0.868632	1
ENSMUSG00000044068	Zrsr1	zinc finger (CCCH type), RNA binding motif and serine/arginine rich 1	547.612	568.396	0.963497	-0.0536485	0.817684	1
ENSMUSG00000085665	Gm12059	predicted gene 12059	7.74586	7.76554	0.997755	-0.00324184	0.968592	1
ENSMUSG00000020290	Xpo1	exportin 1	1333.61	1490.44	0.894849	-0.160284	0.460419	1
ENSMUSG00000056342	Usp34	ubiquitin specific peptidase 34	2506.33	2604.54	0.96231	-0.055427	0.758209	1
ENSMUSG00000065591	Gm22753	predicted gene, 22753	2.08246	3.29505	0.717676	-0.478596	0.803	1
ENSMUSG00000020288	Ahsa2	AHA1, activator of heat shock protein ATPase 2	176.414	266.707	0.662719	-0.59353	0.0494274	1
ENSMUSG00000042208	0610010F05Rik	RIKEN cDNA 0610010F05 gene	206.794	215.182	0.961198	-0.0570941	0.873667	1
ENSMUSG00000020283	Pex13	peroxisomal biogenesis factor 13	185.213	194.938	0.950365	-0.0734465	0.838534	1
ENSMUSG00000020280	Pus10	pseudouridylate synthase 10	163.313	188.739	0.865997	-0.207567	0.483879	1
ENSMUSG00000020275	Rel	reticuloendotheliosis oncogene	431.7	560.934	0.770018	-0.377036	0.456801	1
ENSMUSG00000020273	Papolg	poly(A) polymerase gamma	139.598	153.459	0.910261	-0.135648	0.77649	1
ENSMUSG00000000861	Bcl11a	B cell CLL/lymphoma 11A (zinc finger protein)	60.0136	76.4803	0.787473	-0.344698	0.752894	1
ENSMUSG00000081811	Gm12713	predicted gene 12713	3.09201	11.8629	0.318126	-1.65233	0.162025	1
ENSMUSG00000064090	Vrk2	vaccinia related kinase 2	69.0224	93.3637	0.742048	-0.430415	0.270048	1
ENSMUSG00000084064	Gm12079	predicted gene 12079	10.0411	18.934	0.553885	-0.852343	0.337781	1
ENSMUSG00000086725	A630052C17Rik	RIKEN cDNA A630052C17 gene	22.9298	37.6556	0.619051	-0.69187	0.26183	1
ENSMUSG00000032740	Ccdc88a	coiled coil domain containing 88A	644.716	767.108	0.840658	-0.250409	0.500243	1
ENSMUSG00000020459	Mtif2	mitochondrial translational initiation factor 2	361.392	381.238	0.948078	-0.0769227	0.720019	1
ENSMUSG00000020460	Rps27a	ribosomal protein S27A	68.821	70.7561	0.973033	-0.0394398	0.991801	1
ENSMUSG00000020461	Clhc1	clathrin heavy chain linker domain containing 1	4.23964	6.53381	0.695483	-0.523912	0.769975	1
ENSMUSG00000020458	Rtn4	reticulon 4	1425.9	1497.66	0.952122	-0.0707814	0.708553	1
ENSMUSG00000044072	Eml6	echinoderm microtubule associated protein like 6	188.357	312.533	0.603945	-0.72751	0.0558377	1
ENSMUSG00000078157	4931440F15Rik	RIKEN cDNA 4931440F15 gene	10.7315	11.3738	0.948092	-0.0769009	0.884337	1
ENSMUSG00000080906	Gm12095	predicted gene 12095	6.94911	9.96335	0.725062	-0.463824	0.75145	1
ENSMUSG00000020315	Sptbn1	spectrin beta, non-erythrocytic 1	22891.1	24328.1	0.940934	-0.087834	0.682367	1
ENSMUSG00000082078	Gm12098	predicted gene 12098	10.4553	21.6121	0.506602	-0.981076	0.322953	1
ENSMUSG00000040850	Psme4	proteasome (prosome, macropain) activator subunit 4	1897.2	1926.44	0.984826	-0.0220587	0.962324	1
ENSMUSG00000086986	Gm12103	predicted gene 12103	0	3.41744	0.226375	-2.14321	0.256962	1
ENSMUSG00000043999	Gpr75	G protein-coupled receptor 75	3.44288	5.83315	0.650195	-0.621056	0.75078	1
ENSMUSG00000084146	Gm12104	predicted gene 12104	2.84754	2.91069	0.983852	-0.0234863	1	1
ENSMUSG00000020311	Erlec1	endoplasmic reticulum lectin 1	546.012	573.596	0.951994	-0.0709756	0.859242	1
ENSMUSG00000020305	Asb3	ankyrin repeat and SOCS box-containing 3	81.8591	83.431	0.981383	-0.0271124	0.93881	1
ENSMUSG00000082213	Gm12102	predicted gene 12102	2.60307	4.37186	0.67073	-0.576196	0.824315	1
ENSMUSG00000044502	Bod1	biorientation of chromosomes in cell division 1	365.887	370.752	0.986913	-0.0190046	0.998856	1
ENSMUSG00000085772	D630024D03Rik	RIKEN cDNA D630024D03 gene	99.8272	129.522	0.772491	-0.37241	0.406697	1
ENSMUSG00000020297	Nsg2	neuron specific gene family member 2	21.6758	53.3886	0.416921	-1.26215	0.0262388	1
ENSMUSG00000020279	Il9r	interleukin 9 receptor	1.80631	2.22758	0.86948	-0.201776	1	1
ENSMUSG00000020282	Rhbdf1	rhomboid 5 homolog 1	383.611	439.314	0.873491	-0.195135	0.549252	1
ENSMUSG00000020287	Mpg	N-methylpurine-DNA glycosylase	57.2814	63.4581	0.904175	-0.145327	0.726737	1
ENSMUSG00000069917	Hba-a2	hemoglobin alpha, adult chain 2	147.995	292.202	0.508165	-0.976632	0.406096	1
ENSMUSG00000040711	Sh3pxd2b	SH3 and PX domains 2B	367.056	463.585	0.792225	-0.336018	0.585836	1
ENSMUSG00000044949	Ubtd2	ubiquitin domain containing 2	32.7467	36.1819	0.907612	-0.139852	0.684342	1
ENSMUSG00000020271	Fbxw11	F-box and WD-40 domain protein 11	767.414	823.686	0.931766	-0.10196	0.695822	1
ENSMUSG00000081076	Rpsa-ps4	ribosomal protein S4, pseudogene 4	58.2479	73.6005	0.794203	-0.332421	0.480545	1
ENSMUSG00000087501	Gm12116	predicted gene 12116	0	3.66221	0.214491	-2.22101	0.241986	1
ENSMUSG00000069913	Anp32-ps	acidic (leucine-rich) nuclear phosphoprotein 32 family, pseudogene	132.022	141.311	0.934726	-0.0973853	0.855416	1
ENSMUSG00000053519	Kcnip1	Kv channel-interacting protein 1	0	3.5817	0.21826	-2.19588	0.225109	1
ENSMUSG00000020155	Kcnmb1	potassium large conductance calcium-activated channel, subfamily M, beta member 1	29.1568	82.8227	0.359769	-1.47486	0.0543926	1
ENSMUSG00000085684	4930469K13Rik	RIKEN cDNA 4930469K13 gene	5.52534	19.8341	0.313205	-1.67482	0.066641	1
ENSMUSG00000002699	Lcp2	lymphocyte cytosolic protein 2	202.735	287.376	0.706491	-0.501257	0.429729	1
ENSMUSG00000086243	Gm12121	predicted gene 12121	44.9475	69.5751	0.651044	-0.619174	0.566608	1
ENSMUSG00000047861	Foxi1	forkhead box I1	376.642	403.406	0.933821	-0.0987824	0.916963	1
ENSMUSG00000020143	Dock2	dedicator of cyto-kinesis 2	1097.54	1251.18	0.877303	-0.188854	0.827242	1
ENSMUSG00000069911	Fam196b	family with sequence similarity 196, member B	97.3192	137.439	0.710196	-0.493711	0.56519	1
ENSMUSG00000069910	Spdl1	spindle apparatus coiled-coil protein 1	17.6806	17.931	0.986772	-0.0192117	0.952119	1
ENSMUSG00000056427	Slit3	slit homolog 3 (Drosophila)	284.105	534.398	0.532511	-0.909117	0.202529	1
ENSMUSG00000086311	Gm12122	predicted gene 12122	6.77936	9.72758	0.725174	-0.463601	0.804405	1
ENSMUSG00000018846	Pank3	pantothenate kinase 3	844.128	870.861	0.969338	-0.0449279	0.922566	1
ENSMUSG00000051062	Fbll1	fibrillarin-like 1	1.80631	2.23346	0.867897	-0.204404	1	1
ENSMUSG00000018848	Rars	arginyl-tRNA synthetase	317.2	345.799	0.917536	-0.124163	0.671236	1
ENSMUSG00000049336	Tenm2	teneurin transmembrane protein 2	61.1499	66.0447	0.926991	-0.109372	0.972921	1
ENSMUSG00000082087	Gm12138	predicted gene 12138	79.2877	102.329	0.77701	-0.363995	0.439976	1
ENSMUSG00000042032	Mat2b	methionine adenosyltransferase II, beta	445.347	455.71	0.97731	-0.0331121	0.968909	1
ENSMUSG00000058809	Hspd1-ps3	heat shock protein 1 (chaperonin), pseudogene 3	1505.7	1511.43	0.996212	-0.00547525	0.956944	1
ENSMUSG00000055456	Gm9972	predicted gene 9972	2.08246	4.14197	0.59947	-0.738242	0.650967	1
ENSMUSG00000046491	C1qtnf2	C1q and tumor necrosis factor related protein 2	6.70464	7.89958	0.86573	-0.208011	0.949178	1
ENSMUSG00000045877	4933415A04Rik	RIKEN cDNA 4933415A04 gene	1.14763	3.09837	0.524019	-0.932308	0.750004	1
ENSMUSG00000044950	Pwwp2a	PWWP domain containing 2A	324.471	341.174	0.951187	-0.0721996	0.806615	1
ENSMUSG00000004296	Il12b	interleukin 12b	12.5492	17.475	0.733378	-0.447371	0.78011	1
ENSMUSG00000041231	Ublcp1	ubiquitin-like domain containing CTD phosphatase 1	76.8861	101.44	0.760306	-0.395348	0.356231	1
ENSMUSG00000092889	Gm22121	predicted gene, 22121	0.520614	4.00516	0.30381	-1.71876	0.323666	1
ENSMUSG00000019189	Rnf145	ring finger protein 145	423.384	470.973	0.89917	-0.153335	0.562144	1
ENSMUSG00000057098	Ebf1	early B cell factor 1	353.332	515.083	0.686579	-0.542503	0.213367	1
ENSMUSG00000085784	Gm12158	predicted gene 12158	24.1091	33.125	0.735796	-0.442621	0.56099	1
ENSMUSG00000006169	Clint1	clathrin interactor 1	2195.95	2218.91	0.989656	-0.0150014	0.997924	1
ENSMUSG00000044847	Lsm11	U7 snRNP-specific Sm-like protein LSM11	34.1502	50.5076	0.682427	-0.551254	0.31433	1
ENSMUSG00000011256	Adam19	a disintegrin and metallopeptidase domain 19 (meltrin beta)	173.27	174.966	0.990365	-0.0139675	0.990862	1
ENSMUSG00000020411	Nipal4	NIPA-like domain containing 4	3.99517	7.55087	0.584171	-0.775538	0.534256	1
ENSMUSG00000048721	Fndc9	fibronectin type III domain containing 9	27.4886	30.2331	0.912128	-0.132691	0.854089	1
ENSMUSG00000085853	Gm12167	predicted gene 12167	1.53017	2.85982	0.655514	-0.609301	1	1
ENSMUSG00000020397	Med7	mediator complex subunit 7	60.747	63.799	0.9529	-0.0696027	0.956379	1
ENSMUSG00000082530	Gm12168	predicted gene 12168	36.923	44.0818	0.841205	-0.249471	0.640416	1
ENSMUSG00000020399	Havcr2	hepatitis A virus cellular receptor 2	130.652	153.806	0.850435	-0.233728	0.752042	1
ENSMUSG00000080776	Gm12174	predicted gene 12174	890.615	913.855	0.974597	-0.0371218	0.989418	1
ENSMUSG00000020354	Sgcd	sarcoglycan, delta (dystrophin-associated glycoprotein)	16.4696	18.8232	0.881269	-0.182346	0.937245	1
ENSMUSG00000081952	Gm12178	predicted gene 12178	10.5301	12.0896	0.880853	-0.183026	1	1
ENSMUSG00000082454	Gm12183	predicted gene 12183	3309.03	3605.06	0.917908	-0.123579	0.608686	1
ENSMUSG00000040365	Trim41	tripartite motif-containing 41	389.688	404.45	0.963592	-0.0535052	0.892201	1
ENSMUSG00000069892	9930111J21Rik2	RIKEN cDNA 9930111J21 gene 2	578.804	590.118	0.98086	-0.0278811	0.894929	1
ENSMUSG00000078921	Tgtp2	T cell specific GTPase 2	397.147	403.754	0.983677	-0.0237441	0.8497	1
ENSMUSG00000078920	Ifi47	interferon gamma inducible protein 47	70.075	78.8133	0.890516	-0.167287	0.727505	1
ENSMUSG00000046311	Zfp62	zinc finger protein 62	477.956	511.592	0.93438	-0.0979184	0.715152	1
ENSMUSG00000059864	Olfr1393	olfactory receptor 1393	1.80631	6.19131	0.390237	-1.35758	0.510126	1
ENSMUSG00000085192	Gm12195	predicted gene 12195	7.46972	9.03003	0.844436	-0.24394	0.886711	1
ENSMUSG00000020381	Mrnip	MRN complex interacting protein	69.7875	77.9042	0.897133	-0.156607	0.726823	1
ENSMUSG00000015837	Sqstm1	sequestosome 1	3801.72	4536.86	0.837999	-0.25498	0.327652	1
ENSMUSG00000050567	Maml1	mastermind like 1 (Drosophila)	446.064	447.704	0.996345	-0.00528321	0.863812	1
ENSMUSG00000020368	Canx	calnexin	7661.7	7711.08	0.993597	-0.00926677	0.974934	1
ENSMUSG00000050087	Cby3	chibby family member 3	4.68553	5.24855	0.909896	-0.136226	0.906148	1
ENSMUSG00000007850	Hnrnph1	heterogeneous nuclear ribonucleoprotein H1	2975.66	3128.84	0.951059	-0.0723939	0.656101	1
ENSMUSG00000044807	Zfp354c	zinc finger protein 354C	90.1686	90.4498	0.996926	-0.00444195	0.928641	1
ENSMUSG00000044296	Zfp879	zinc finger protein 879	13.6221	24.1876	0.580526	-0.784567	0.366604	1
ENSMUSG00000049321	Zfp2	zinc finger protein 2	51.2899	55.5126	0.925277	-0.112042	0.934253	1
ENSMUSG00000020335	Zfp354b	zinc finger protein 354B	21.4313	22.7119	0.945993	-0.0800991	0.900371	1
ENSMUSG00000020385	Clk4	CDC like kinase 4	881.884	1069.33	0.824875	-0.277753	0.271041	1
ENSMUSG00000020359	Phykpl	5-phosphohydroxy-L-lysine phospholyase	616.018	700.572	0.87948	-0.185277	0.383201	1
ENSMUSG00000020358	Hnrnpab	heterogeneous nuclear ribonucleoprotein A/B	2245.43	2465.93	0.910617	-0.135084	0.577323	1
ENSMUSG00000001056	Nhp2	NHP2 ribonucleoprotein	154.261	183.057	0.84355	-0.245454	0.506226	1
ENSMUSG00000001054	Rmnd5b	required for meiotic nuclear division 5 homolog B	199.269	242.261	0.823271	-0.28056	0.389024	1
ENSMUSG00000052563	D930048N14Rik	RIKEN cDNA D930048N14 gene	49.9181	78.0773	0.643902	-0.635086	0.303468	1
ENSMUSG00000007777	0610009B22Rik	RIKEN cDNA 0610009B22 gene	44.3408	57.7785	0.771383	-0.374481	0.530469	1
ENSMUSG00000084744	Gm25291	predicted gene, 25291	73.941	79.7931	0.927567	-0.108476	0.82813	1
ENSMUSG00000020387	Jade2	jade family PHD finger 2	879.58	974.863	0.902361	-0.148224	0.537614	1
ENSMUSG00000020389	Cdkl3	cyclin-dependent kinase-like 3	35.8932	45.9512	0.785777	-0.347809	0.587392	1
ENSMUSG00000062204	Olfr1373	olfactory receptor 1373	0	6.8411	0.127533	-2.97106	0.0522991	1
ENSMUSG00000086920	Gm12207	predicted gene 12207	62.7751	64.2213	0.977826	-0.0323507	0.98077	1
ENSMUSG00000000782	Tcf7	transcription factor 7, T cell specific	106.428	131.267	0.812206	-0.300082	0.857967	1
ENSMUSG00000086395	A630014C17Rik	RIKEN cDNA A630014C17 gene	0	5.85658	0.145845	-2.77749	0.266491	1
ENSMUSG00000020361	Hspa4	heat shock protein 4	2681.51	2746.38	0.976391	-0.0344695	0.934566	1
ENSMUSG00000018239	Zcchc10	zinc finger, CCHC domain containing 10	58.7368	63.2867	0.929225	-0.1059	0.778031	1
ENSMUSG00000049470	Aff4	AF4/FMR2 family, member 4	3344.92	3688.26	0.906934	-0.14093	0.521413	1
ENSMUSG00000036216	Leap2	liver-expressed antimicrobial peptide 2	5.83315	17.1682	0.376106	-1.41079	0.103078	1
ENSMUSG00000044894	Uqcrq	ubiquinol-cytochrome c reductase, complex III subunit VII	1657.08	1717.47	0.964857	-0.0516126	0.882519	1
ENSMUSG00000018238	Gdf9	growth differentiation factor 9	6.2157	9.03592	0.718987	-0.475962	0.620912	1
ENSMUSG00000018387	Shroom1	shroom family member 1	2.5714	13.5032	0.246249	-2.02181	0.0769528	1
ENSMUSG00000018398	Sept8	septin 8	443.806	503.337	0.881962	-0.181212	0.493718	1
ENSMUSG00000086851	A430108G06Rik	RIKEN cDNA A430108G06 gene	1.56184	3.7545	0.538825	-0.892111	0.608926	1
ENSMUSG00000020380	Rad50	RAD50 double strand break repair protein	491.949	502.862	0.978341	-0.0315909	0.927489	1
ENSMUSG00000018899	Irf1	interferon regulatory factor 1	2094.68	2432.88	0.861044	-0.215842	0.296706	1
ENSMUSG00000091191	Gm17334	predicted gene, 17334	65.824	99.9548	0.66192	-0.595271	0.123025	1
ENSMUSG00000081769	Gm12216	predicted gene 12216	64.2938	80.942	0.79683	-0.327656	0.473844	1
ENSMUSG00000018906	P4ha2	procollagen-proline, 2-oxoglutarate 4-dioxygenase (proline 4-hydroxylase), alpha II polypeptide	217.962	267.102	0.816712	-0.2921	0.508049	1
ENSMUSG00000018916	Csf2	colony stimulating factor 2 (granulocyte-macrophage)	2.6778	4.6163	0.654843	-0.610779	0.808586	1
ENSMUSG00000078151	Gm12226	predicted pseudogene 12226	44.5422	49.3539	0.904442	-0.144899	0.785554	1
ENSMUSG00000035992	Fnip1	folliculin interacting protein 1	928.783	947.308	0.980465	-0.028462	0.894499	1
ENSMUSG00000037533	Rapgef6	Rap guanine nucleotide exchange factor (GEF) 6	945.893	1149.81	0.822807	-0.281375	0.265694	1
ENSMUSG00000086039	Gm12227	predicted gene 12227	7.71419	11.1051	0.719876	-0.474179	0.674224	1
ENSMUSG00000082503	Gm12229	predicted gene 12229	7.22525	8.91353	0.829699	-0.26934	0.789722	1
ENSMUSG00000020268	Lyrm7	LYR motif containing 7	25.4264	39.8914	0.64626	-0.629814	0.247914	1
ENSMUSG00000049588	Ccdc69	coiled-coil domain containing 69	22.1647	27.1495	0.822916	-0.281182	0.687154	1
ENSMUSG00000049491	Slc36a3	solute carrier family 36 (proton/amino acid symporter), member 3	5.90788	5.97619	0.990208	-0.0141965	0.929538	1
ENSMUSG00000020261	Slc36a1	solute carrier family 36 (proton/amino acid symporter), member 1	683.047	760.43	0.898371	-0.154617	0.55777	1
ENSMUSG00000055333	Fat2	FAT atypical cadherin 2	13.5473	14.3951	0.944935	-0.0817133	0.994869	1
ENSMUSG00000018593	Sparc	secreted acidic cysteine rich glycoprotein	1478.1	2072.47	0.713345	-0.487329	0.0614317	1
ENSMUSG00000018583	G3bp1	GTPase activating protein (SH3 domain) binding protein 1	682.848	716.965	0.952481	-0.0702374	0.805391	1
ENSMUSG00000020520	Galnt10	UDP-N-acetyl-alpha-D-galactosamine:polypeptide N-acetylgalactosaminyltransferase 10	252.558	261.425	0.966211	-0.0495905	0.864194	1
ENSMUSG00000037331	Larp1	La ribonucleoprotein domain family, member 1	2119.97	2241.12	0.945964	-0.0801432	0.754363	1
ENSMUSG00000086962	Gm12248	predicted gene 12248	6.2157	8.74973	0.740092	-0.434223	0.635006	1
ENSMUSG00000020514	Mrpl22	mitochondrial ribosomal protein L22	79.9147	90.8173	0.881258	-0.182363	0.778062	1
ENSMUSG00000078853	Igtp	interferon gamma induced GTPase	249.484	289.466	0.862353	-0.21365	0.547036	1
ENSMUSG00000087347	1700047K16Rik	RIKEN cDNA 1700047K16 gene	6.39682	10.9089	0.621117	-0.687062	0.59344	1
ENSMUSG00000085342	Gm12254	predicted gene 12254	235.559	248.012	0.949989	-0.0740179	0.962378	1
ENSMUSG00000072915	Gm12258	predicted gene 12258	30.2298	33.0723	0.916573	-0.125678	0.822986	1
ENSMUSG00000020491	2810021J22Rik	RIKEN cDNA 2810021J22 gene	59.6514	63.2213	0.944412	-0.0825121	0.960733	1
ENSMUSG00000020490	Btnl10	butyrophilin-like 10	6.77936	8.11148	0.853798	-0.228034	0.983918	1
ENSMUSG00000056895	Hist3h2ba	histone cluster 3, H2ba	9.96639	12.2863	0.825389	-0.276853	0.79113	1
ENSMUSG00000080712	Hist3h2bb-ps	histone cluster 3, H2bb, pseudogene	3.82542	5.29941	0.766012	-0.384562	0.91882	1
ENSMUSG00000078851	Hist3h2a	histone cluster 3, H2a	79.4891	82.9439	0.958844	-0.0606313	0.948622	1
ENSMUSG00000085379	2310058D17Rik	RIKEN cDNA 2310058D17 gene	20.4965	28.1337	0.737855	-0.43859	0.51149	1
ENSMUSG00000061462	Obscn	obscurin, cytoskeletal calmodulin and titin-interacting RhoGEF	31.7169	43.7031	0.731871	-0.45034	0.3646	1
ENSMUSG00000043448	Gjc2	gap junction protein, gamma 2	2.81587	5.57072	0.580738	-0.784041	0.749243	1
ENSMUSG00000085882	2610507I01Rik	RIKEN cDNA 2610507I01 gene	39.2296	46.6258	0.844703	-0.243483	0.711297	1
ENSMUSG00000048076	Arf1	ADP-ribosylation factor 1	1776.42	1950.92	0.910603	-0.135106	0.587003	1
ENSMUSG00000084145	Gm12263	predicted gene 12263	122.064	125.999	0.96902	-0.0454022	0.886316	1
ENSMUSG00000072893	4933439C10Rik	RIKEN cDNA 4933439C10 gene	43.1818	44.6488	0.967861	-0.0471276	0.92969	1
ENSMUSG00000032691	Nlrp3	NLR family, pyrin domain containing 3	305.183	442.733	0.690017	-0.535297	0.296234	1
ENSMUSG00000059610	Olfr222	olfactory receptor 222	0	3.50973	0.221743	-2.17304	0.489884	1
ENSMUSG00000005417	Mprip	myosin phosphatase Rho interacting protein	4010.7	4568.05	0.878016	-0.18768	0.372832	1
ENSMUSG00000086330	1700007J10Rik	RIKEN cDNA 1700007J10 gene	26.5741	37.9598	0.707757	-0.498673	0.396046	1
ENSMUSG00000086536	Gm12264	predicted gene 12264	4.86665	10.0255	0.532096	-0.910241	0.569979	1
ENSMUSG00000043648	Pld6	phospholipase D family, member 6	7.50139	25.1687	0.324869	-1.62207	0.160203	1
ENSMUSG00000087249	Gm16062	predicted gene 16062	1.56184	2.46924	0.738445	-0.437437	0.897561	1
ENSMUSG00000085260	Med9os	mediator complex subunit 9, opposite strand	1.04123	9.99312	0.185682	-2.42909	0.0446267	1
ENSMUSG00000049892	Rasd1	RAS, dexamethasone-induced 1	411.45	458.643	0.897327	-0.156294	0.567909	1
ENSMUSG00000051008	4930412M03Rik	RIKEN cDNA 4930412M03 gene	24.598	39.1498	0.637563	-0.649359	0.248343	1
ENSMUSG00000000538	Tom1l2	target of myb1-like 2 (chicken)	1504.24	1620.65	0.928215	-0.107468	0.69912	1
ENSMUSG00000083412	Gm12268	predicted gene 12268	2.08246	3.23875	0.727209	-0.459559	0.849186	1
ENSMUSG00000020536	Llgl1	lethal giant larvae homolog 1 (Drosophila)	205.933	244.46	0.843043	-0.246322	0.483431	1
ENSMUSG00000002812	Flii	flightless I actin binding protein	1458.34	1474.68	0.988927	-0.0160638	0.964105	1
ENSMUSG00000002814	Top3a	topoisomerase (DNA) III alpha	106.541	133.358	0.800403	-0.321201	0.370128	1
ENSMUSG00000049323	Smcr8	Smith-Magenis syndrome chromosome region, candidate 8 homolog (human)	963.87	975.466	0.988125	-0.0172349	0.962941	1
ENSMUSG00000018932	Map2k3	mitogen-activated protein kinase kinase 3	433.633	472.359	0.918189	-0.123137	0.610505	1
ENSMUSG00000010142	Tnfrsf13b	tumor necrosis factor receptor superfamily, member 13b	36.9661	62.892	0.594222	-0.750925	0.262438	1
ENSMUSG00000010025	Aldh3a2	aldehyde dehydrogenase family 3, subfamily A2	776.382	1071.46	0.724857	-0.464231	0.0839441	1
ENSMUSG00000010122	Slc47a1	solute carrier family 47, member 1	2433.92	2687.86	0.905559	-0.14312	0.741333	1
ENSMUSG00000042436	Mfap4	microfibrillar-associated protein 4	89.5733	249.777	0.361171	-1.46925	0.091187	1
ENSMUSG00000001034	Mapk7	mitogen-activated protein kinase 7	151.18	159.333	0.949152	-0.0752887	0.84816	1
ENSMUSG00000060808	B9d1os	B9 protein domain 1, opposite strand	3.47455	4.96235	0.750468	-0.414138	0.829698	1
ENSMUSG00000001036	Epn2	epsin 2	500.408	535.155	0.935192	-0.0966662	0.675313	1
ENSMUSG00000020528	Prpsap2	phosphoribosyl pyrophosphate synthetase-associated protein 2	75.7384	103.457	0.734644	-0.444883	0.25395	1
ENSMUSG00000072847	A530017D24Rik	RIKEN cDNA A530017D24 gene	86.7891	90.741	0.956924	-0.0635245	0.860831	1
ENSMUSG00000047804	Akap10	A kinase (PRKA) anchor protein 10	598.49	649.413	0.921706	-0.117622	0.652915	1
ENSMUSG00000042331	Specc1	sperm antigen with calponin homology and coiled-coil domains 1	1242.98	1379.1	0.901367	-0.149814	0.522554	1
ENSMUSG00000042298	Ttc19	tetratricopeptide repeat domain 19	370.892	402.247	0.922244	-0.11678	0.666693	1
ENSMUSG00000018501	Ncor1	nuclear receptor co-repressor 1	5637.95	6551.27	0.860611	-0.216567	0.341085	1
ENSMUSG00000018509	Cenpv	centromere protein V	59.3322	73.2566	0.812482	-0.299592	0.547252	1
ENSMUSG00000087120	Gm12279	predicted gene 12279	2.05078	4.40163	0.56479	-0.824214	0.695107	1
ENSMUSG00000018507	Trpv2	transient receptor potential cation channel, subfamily V, member 2	92.8895	128.446	0.725319	-0.463312	0.249879	1
ENSMUSG00000065734	Snord49a	small nucleolar RNA, C/D box 49A	5.93955	7.92035	0.777946	-0.362258	0.73949	1
ENSMUSG00000077457	Snord65	small nucleolar RNA, C/D box 65	1.53017	2.33786	0.758022	-0.399688	1	1
ENSMUSG00000085762	Lrrc75aos2	leucine rich repeat containing 75A, opposite strand 2	20.6776	27.4506	0.761938	-0.392255	0.634569	1
ENSMUSG00000048497	Mmgt2	membrane magnesium transporter 2	74.7922	84.1973	0.889608	-0.168758	0.646794	1
ENSMUSG00000005267	Zfp287	zinc finger protein 287	67.7911	86.1675	0.789183	-0.341568	0.449825	1
ENSMUSG00000084020	Wsb2-ps	WD repeat and SOCS box-containing 2, pseudogene	131.789	150.188	0.878302	-0.187211	0.681063	1
ENSMUSG00000047821	Trim16	tripartite motif-containing 16	162.913	181.441	0.898442	-0.154503	0.747718	1
ENSMUSG00000018217	Pmp22	peripheral myelin protein 22	193.364	228.068	0.848498	-0.237016	0.465519	1
ENSMUSG00000081600	Gm12286	predicted gene 12286	1.94438	3.33415	0.679345	-0.557783	0.849145	1
ENSMUSG00000042148	Cox10	cytochrome c oxidase assembly protein 10	270.564	271.165	0.997791	-0.00318985	0.945089	1
ENSMUSG00000084884	Gm12289	predicted gene 12289	1.91271	4.16585	0.563839	-0.826644	0.75783	1
ENSMUSG00000087497	2810001G20Rik	RIKEN cDNA 2810001G20 gene	16.0237	43.3606	0.383758	-1.38173	0.0784897	1
ENSMUSG00000047759	Hs3st3a1	heparan sulfate (glucosamine) 3-O-sulfotransferase 3A1	32.9709	33.7159	0.978541	-0.0312955	0.89866	1
ENSMUSG00000020549	Elac2	elaC ribonuclease Z 2	291.011	352.357	0.826391	-0.275104	0.370743	1
ENSMUSG00000033389	Arhgap44	Rho GTPase activating protein 44	179.454	217.504	0.825862	-0.276028	0.464975	1
ENSMUSG00000083935	Gm12294	predicted gene 12294	3.47455	5.001	0.745635	-0.423459	0.945949	1
ENSMUSG00000020548	1700086D15Rik	RIKEN cDNA 1700086D15 gene	9.99807	11.1982	0.901614	-0.149418	0.813698	1
ENSMUSG00000018347	Zkscan6	zinc finger with KRAB and SCAN domains 6	126.508	142.618	0.887826	-0.171651	0.692286	1
ENSMUSG00000056752	Dnah9	dynein, axonemal, heavy chain 9	4.02684	18.1883	0.261974	-1.93251	0.0302329	1
ENSMUSG00000085683	9130409J20Rik	RIKEN cDNA 9130409J20 gene	1.53017	3.24464	0.596086	-0.746408	0.790101	1
ENSMUSG00000050270	Tmem220	transmembrane protein 220	53.6485	54.4811	0.984992	-0.0218167	0.95798	1
ENSMUSG00000069844	Sco1	SCO1 cytochrome c oxidase assembly protein	161.092	161.167	0.999542	-0.000660836	0.898779	1
ENSMUSG00000087058	Gm12301	predicted gene 12301	6.2157	7.70568	0.828849	-0.270818	0.782048	1
ENSMUSG00000049928	Glp2r	glucagon-like peptide 2 receptor	6.98078	9.9427	0.729325	-0.455367	0.623531	1
ENSMUSG00000020903	Stx8	syntaxin 8	221.679	226.575	0.978483	-0.0313809	0.880991	1
ENSMUSG00000082266	Gm12303	predicted gene 12303	1.94438	8.84501	0.299074	-1.74143	0.250367	1
ENSMUSG00000020902	Ntn1	netrin 1	479.348	662.316	0.724162	-0.465616	0.203879	1
ENSMUSG00000084993	Gm12305	predicted gene 12305	6.18402	11.0074	0.5983	-0.74106	0.50529	1
ENSMUSG00000048329	Mfsd6l	major facilitator superfamily domain containing 6-like	35.0533	54.1684	0.653514	-0.613709	0.244288	1
ENSMUSG00000045915	Ccdc42	coiled-coil domain containing 42	0.765084	3.53983	0.3888	-1.3629	0.558214	1
ENSMUSG00000020900	Myh10	myosin, heavy polypeptide 10, non-muscle	2320.81	2536.24	0.915092	-0.128012	0.515406	1
ENSMUSG00000032921	Odf4	outer dense fiber of sperm tails 4	5.00472	13.4973	0.414196	-1.27161	0.281326	1
ENSMUSG00000018740	Slc25a35	solute carrier family 25, member 35	126.505	143.177	0.884366	-0.177285	0.725127	1
ENSMUSG00000020899	Pfas	phosphoribosylformylglycinamidine synthase (FGAR amidotransferase)	458.435	470.396	0.974627	-0.0370782	0.962688	1
ENSMUSG00000020897	Aurkb	aurora kinase B	13.5473	13.8165	0.981836	-0.0264462	0.920136	1
ENSMUSG00000045176	Borcs6	BLOC-1 related complex subunit 6	42.4597	42.7728	0.992849	-0.0103543	1	1
ENSMUSG00000064899	Snord118	small nucleolar RNA, C/D box 118	68.5968	83.0295	0.828242	-0.271875	0.648516	1
ENSMUSG00000020894	Vamp2	vesicle-associated membrane protein 2	578.756	650.592	0.889753	-0.168523	0.482369	1
ENSMUSG00000023781	Hes7	hairy and enhancer of split 7 (Drosophila)	1.56184	3.44443	0.576417	-0.794816	0.672265	1
ENSMUSG00000020892	Aloxe3	arachidonate lipoxygenase 3	1.66824	6.16432	0.372434	-1.42494	0.371613	1
ENSMUSG00000032782	Cntrob	centrobin, centrosomal BRCA2 interacting protein	108.497	114.289	0.949758	-0.0743688	0.806663	1
ENSMUSG00000043419	Chd3os	chromodomain helicase DNA binding protein 3, opposite strand	10.5617	12.8889	0.832443	-0.264577	0.82638	1
ENSMUSG00000018474	Chd3	chromodomain helicase DNA binding protein 3	5010.79	6363	0.787522	-0.344607	0.384111	1
ENSMUSG00000087881	Gm22442	predicted gene, 22442	501.87	549.553	0.913391	-0.130696	0.796332	1
ENSMUSG00000044795	Cyb5d1	cytochrome b5 domain containing 1	252.97	278.096	0.909972	-0.136106	0.612606	1
ENSMUSG00000045377	Tmem88	transmembrane protein 88	64.3913	96.135	0.6732	-0.570892	0.179552	1
ENSMUSG00000018476	Kdm6b	KDM1 lysine (K)-specific demethylase 6B	2630.95	3493.73	0.75312	-0.409048	0.117771	1
ENSMUSG00000085178	Kdm6bos	KDM1 lysine (K)-specific demethylase 6B, opposite strand	15.3537	30.4978	0.519201	-0.945636	0.174446	1
ENSMUSG00000005237	Dnah2	dynein, axonemal, heavy chain 2	56.9305	61.9178	0.920733	-0.119146	0.730424	1
ENSMUSG00000086591	Dnah2os	dynein, axonemal, heavy chain 2, opposite strand	6.01428	9.93325	0.641554	-0.640357	0.659582	1
ENSMUSG00000003934	Efnb3	ephrin B3	3.6443	4.18384	0.895918	-0.158561	0.864233	1
ENSMUSG00000041346	Wrap53	WD repeat containing, antisense to Trp53	72.9112	80.2611	0.909552	-0.136772	0.838043	1
ENSMUSG00000059552	Trp53	transformation related protein 53	157.428	169.473	0.929345	-0.105714	0.711566	1
ENSMUSG00000041329	Atp1b2	ATPase, Na+/K+ transporting, beta 2 polypeptide	215.198	435.301	0.495526	-1.01297	0.126289	1
ENSMUSG00000041287	Sox15	SRY (sex determining region Y)-box 15	4.97305	5.49609	0.919483	-0.121105	1	1
ENSMUSG00000018761	Mpdu1	mannose-P-dolichol utilization defect 1	190.249	218.157	0.872659	-0.19651	0.602293	1
ENSMUSG00000088752	Mir1934	microRNA 1934	2.29525	2.91658	0.841361	-0.249203	1	1
ENSMUSG00000059796	Eif4a1	eukaryotic translation initiation factor 4A1	598.116	692.902	0.863402	-0.211896	0.349154	1
ENSMUSG00000005204	Senp3	SUMO/sentrin specific peptidase 3	387.64	391.661	0.989759	-0.0148513	0.99184	1
ENSMUSG00000089669	Tnfsf13	tumor necrosis factor (ligand) superfamily, member 13	3.99517	4.61041	0.890339	-0.167574	1	1
ENSMUSG00000005198	Polr2a	polymerase (RNA) II (DNA directed) polypeptide A	2994.03	3007.18	0.995629	-0.00632038	0.968062	1
ENSMUSG00000018776	Slc35g3	solute carrier family 35, member G3	4.54745	7.72056	0.636135	-0.652595	0.600424	1
ENSMUSG00000018750	Zbtb4	zinc finger and BTB domain containing 4	895.676	914.196	0.979764	-0.0294943	0.948877	1
ENSMUSG00000041189	Chrnb1	cholinergic receptor, nicotinic, beta polypeptide 1 (muscle)	80.956	85.7263	0.944995	-0.081621	0.855224	1
ENSMUSG00000042826	Fgf11	fibroblast growth factor 11	48.7818	64.7336	0.757327	-0.401012	0.404875	1
ENSMUSG00000089876	Tmem102	transmembrane protein 102	64.8372	77.3572	0.840219	-0.251162	0.691498	1
ENSMUSG00000019461	Plscr3	phospholipid scramblase 3	79.84	110.18	0.727108	-0.459758	0.253555	1
ENSMUSG00000046731	Kctd11	potassium channel tetramerisation domain containing 11	61.2449	65.0667	0.942151	-0.0859691	0.765126	1
ENSMUSG00000001588	Acap1	ArfGAP with coiled-coil, ankyrin repeat and PH domains 1	45.5201	66.9345	0.684778	-0.546291	0.646471	1
ENSMUSG00000018570	2810408A11Rik	RIKEN cDNA 2810408A11 gene	7.08718	9.46249	0.772969	-0.371518	0.790816	1
ENSMUSG00000047284	Neurl4	neuralized E3 ubiquitin protein ligase 4	935.2	938.376	0.996619	-0.00488673	0.984773	1
ENSMUSG00000018554	Ybx2	Y box protein 2	154.474	211.011	0.73333	-0.447466	0.26624	1
ENSMUSG00000018566	Slc2a4	solute carrier family 2 (facilitated glucose transporter), member 4	313.961	325.56	0.964483	-0.0521725	0.918878	1
ENSMUSG00000018569	Cldn7	claudin 7	216.706	249.773	0.868137	-0.204006	0.539993	1
ENSMUSG00000018565	Elp5	elongator acetyltransferase complex subunit 5	181.781	184.101	0.987468	-0.0181939	0.992103	1
ENSMUSG00000018572	Phf23	PHD finger protein 23	361.561	372.258	0.971343	-0.041948	0.848999	1
ENSMUSG00000020886	Dlg4	discs, large homolog 4 (Drosophila)	106.201	140.695	0.756562	-0.402469	0.236827	1
ENSMUSG00000040963	Asgr2	asialoglycoprotein receptor 2	7.02383	12.6711	0.586917	-0.76877	0.548289	1
ENSMUSG00000040938	Slc16a11	solute carrier family 16 (monocarboxylic acid transporters), member 11	175.566	202.48	0.867728	-0.204684	0.741339	1
ENSMUSG00000044367	Slc16a13	solute carrier family 16 (monocarboxylic acid transporters), member 13	336.083	394.804	0.851641	-0.231682	0.72597	1
ENSMUSG00000065411	Mir195a	microRNA 195a	1.04123	4.14786	0.39652	-1.33454	0.655402	1
ENSMUSG00000020831	0610010K14Rik	RIKEN cDNA 0610010K14 gene	5.73813	6.84388	0.859031	-0.219218	1	1
ENSMUSG00000080814	Gm12314	predicted gene 12314	1.53017	2.54664	0.713398	-0.48722	1	1
ENSMUSG00000018923	Med11	mediator complex subunit 11	139.799	153.204	0.913072	-0.1312	0.651757	1
ENSMUSG00000020827	Mink1	misshapen-like kinase 1 (zebrafish)	2441.71	2665.43	0.916095	-0.126431	0.590147	1
ENSMUSG00000014609	Chrne	cholinergic receptor, nicotinic, epsilon polypeptide	6.84271	11.7374	0.615724	-0.699644	0.493257	1
ENSMUSG00000087279	4930544D05Rik	RIKEN cDNA 4930544D05 gene	1.04123	3.26263	0.478866	-1.06231	0.562539	1
ENSMUSG00000085952	Gm12315	predicted gene 12315	3.36815	4.47315	0.798107	-0.325346	0.926207	1
ENSMUSG00000050675	Gp1ba	glycoprotein 1b, alpha polypeptide	30.3564	52.8949	0.581807	-0.781388	0.117622	1
ENSMUSG00000040746	Rnf167	ring finger protein 167	532.827	545.918	0.976063	-0.0349538	0.969829	1
ENSMUSG00000018293	Pfn1	profilin 1	1185.9	1224.11	0.968813	-0.0457103	0.843366	1
ENSMUSG00000087523	Gm12319	predicted gene 12319	7.95866	10.4701	0.781045	-0.356523	0.833456	1
ENSMUSG00000040712	Camta2	calmodulin binding transcription activator 2	778.433	836.082	0.931131	-0.102944	0.632085	1
ENSMUSG00000020817	Rabep1	rabaptin, RAB GTPase binding effector protein 1	1387.1	1478.9	0.937973	-0.0923823	0.718118	1
ENSMUSG00000081968	Rpl23a-ps2	ribosomal protein L23A, pseudogene 2	3.36815	6.6382	0.571883	-0.806209	0.552799	1
ENSMUSG00000084139	Gm12322	predicted gene 12322	2.5714	5.22201	0.573994	-0.800891	0.687778	1
ENSMUSG00000018451	6330403K07Rik	RIKEN cDNA 6330403K07 gene	5.41894	6.17287	0.894891	-0.160216	1	1
ENSMUSG00000069830	Nlrp1a	NLR family, pyrin domain containing 1A	24.2902	28.9533	0.844321	-0.244136	0.717013	1
ENSMUSG00000070390	Nlrp1b	NLR family, pyrin domain containing 1B	225.547	237.453	0.950072	-0.0738917	0.849454	1
ENSMUSG00000040543	Pitpnm3	PITPNM family member 3	173.694	231.812	0.750364	-0.414337	0.180849	1
ENSMUSG00000020807	4933427D14Rik	RIKEN cDNA 4933427D14 gene	203.276	270.548	0.752264	-0.410688	0.172306	1
ENSMUSG00000053574	4930563E22Rik	RIKEN cDNA 4930563E22 gene	7.77754	7.99232	0.976115	-0.0348767	0.916622	1
ENSMUSG00000020805	Slc13a5	solute carrier family 13 (sodium-dependent citrate transporter), member 5	2.29525	12.451	0.244981	-2.02926	0.27092	1
ENSMUSG00000064567	Gm24143	predicted gene, 24143	1.56184	2.58851	0.713901	-0.486204	0.821402	1
ENSMUSG00000055670	Zzef1	zinc finger, ZZ-type with EF hand domain 1	1577.33	1682.33	0.937627	-0.0929147	0.698665	1
ENSMUSG00000065298	Gm26121	predicted gene, 26121	2.5714	2.66003	0.975783	-0.0353679	0.974086	1
ENSMUSG00000020788	Atp2a3	ATPase, Ca++ transporting, ubiquitous	782.708	1107.11	0.707247	-0.499713	0.240454	1
ENSMUSG00000020787	P2rx1	purinergic receptor P2X, ligand-gated ion channel, 1	68.4701	169.248	0.408052	-1.29318	0.0986834	1
ENSMUSG00000086943	4732414G09Rik	RIKEN cDNA 4732414G09 gene	3.61263	9.08989	0.457153	-1.12925	0.342027	1
ENSMUSG00000020785	Camkk1	calcium/calmodulin-dependent protein kinase kinase 1, alpha	28.9643	30.2456	0.958996	-0.060404	0.874986	1
ENSMUSG00000020783	Ncbp3	nuclear cap binding subunit 3	356.878	392.024	0.910576	-0.135148	0.664219	1
ENSMUSG00000005950	P2rx5	purinergic receptor P2X, ligand-gated ion channel, 5	73.3685	97.1413	0.757769	-0.40017	0.33363	1
ENSMUSG00000005949	Ctns	cystinosis, nephropathic	296.494	327.012	0.90696	-0.140889	0.699435	1
ENSMUSG00000020745	Pafah1b1	platelet-activating factor acetylhydrolase, isoform 1b, subunit 1	1343.33	1433.49	0.937145	-0.0936559	0.69556	1
ENSMUSG00000010554	Mettl16	methyltransferase like 16	305.652	320.373	0.954194	-0.0676459	0.809487	1
ENSMUSG00000000282	Mnt	max binding protein	470.665	539.134	0.873236	-0.195556	0.415774	1
ENSMUSG00000077493	Snord91a	small nucleolar RNA, C/D box 91A	1.42377	4.18384	0.467562	-1.09677	0.506936	1
ENSMUSG00000077637	Gm22771	predicted gene, 22771	3.09201	6.38799	0.553873	-0.852372	0.558506	1
ENSMUSG00000085765	Gm12333	predicted gene 12333	7.22525	7.55664	0.961271	-0.0569844	1	1
ENSMUSG00000085738	Gm12335	predicted gene 12335	7.71419	21.3259	0.390317	-1.35728	0.344683	1
ENSMUSG00000043099	Hic1	hypermethylated in cancer 1	45.3909	72.1295	0.634366	-0.656612	0.119015	1
ENSMUSG00000085609	1700016P03Rik	RIKEN cDNA 1700016P03 gene	10.9759	11.3468	0.969965	-0.0439957	0.930454	1
ENSMUSG00000065590	Mir212	microRNA 212	3.06034	3.09837	0.990719	-0.0134519	0.949684	1
ENSMUSG00000065537	Mir132	microRNA 132	4.23964	5.22201	0.842114	-0.247913	0.933135	1
ENSMUSG00000038268	Ovca2	candidate tumor suppressor in ovarian cancer 2	58.0781	67.6792	0.860204	-0.21725	0.645428	1
ENSMUSG00000045287	Rtn4rl1	reticulon 4 receptor-like 1	190.824	191.95	0.994166	-0.00844119	0.912337	1
ENSMUSG00000000751	Rpa1	replication protein A1	402.303	417.439	0.963828	-0.0531524	0.927315	1
ENSMUSG00000000753	Serpinf1	serine (or cysteine) peptidase inhibitor, clade F, member 1	87.287	136.401	0.642549	-0.638122	0.210983	1
ENSMUSG00000045374	Wdr81	WD repeat domain 81	733.902	985.416	0.745023	-0.424643	0.183254	1
ENSMUSG00000085148	Mir22hg	Mir22 host gene (non-protein coding)	157	199.304	0.788801	-0.342266	0.257759	1
ENSMUSG00000038217	Tlcd2	TLC domain containing 2	49.7483	93.846	0.53506	-0.902227	0.0334206	1
ENSMUSG00000038195	Rilp	Rab interacting lysosomal protein	220.16	242.215	0.90932	-0.13714	0.818175	1
ENSMUSG00000038178	Slc43a2	solute carrier family 43, member 2	3370.21	3427.44	0.983309	-0.0242828	0.976959	1
ENSMUSG00000093100	Mir3971	microRNA 3971	1.04123	4.59553	0.364796	-1.45484	0.420139	1
ENSMUSG00000017781	Pitpna	phosphatidylinositol transfer protein, alpha	1047.64	1064.5	0.98417	-0.0230205	1	1
ENSMUSG00000085088	4931413K12Rik	RIKEN cDNA 4931413K12 gene	50.4298	65.2034	0.776845	-0.364301	0.726666	1
ENSMUSG00000006127	Inpp5k	inositol polyphosphate 5-phosphatase K	474.608	518.059	0.916289	-0.126125	0.601819	1
ENSMUSG00000017776	Crk	v-crk avian sarcoma virus CT10 oncogene homolog	1118.48	1128.89	0.990782	-0.0133605	0.949406	1
ENSMUSG00000020847	Rph3al	rabphilin 3A-like (without C2 domains)	121.057	141.513	0.85646	-0.223542	0.594948	1
ENSMUSG00000020846	Rflnb	refilin B	260.252	326.895	0.796756	-0.327791	0.2722	1
ENSMUSG00000038046	Mrm3	mitochondrial rRNA methyltransferase 3	83.2082	85.3081	0.975669	-0.0355358	1	1
ENSMUSG00000020844	Nxn	nucleoredoxin	145.92	159.157	0.91735	-0.124456	0.744103	1
ENSMUSG00000020843	Timm22	translocase of inner mitochondrial membrane 22	146.397	171.376	0.855092	-0.225849	0.488436	1
ENSMUSG00000017631	Abr	active BCR-related gene	1360.73	1709.18	0.796245	-0.328715	0.16672	1
ENSMUSG00000080763	Gm12341	predicted gene 12341	8.83014	11.744	0.771352	-0.374538	0.87116	1
ENSMUSG00000046275	Tusc5	tumor suppressor candidate 5	26.7982	70.9473	0.386369	-1.37195	0.189695	1
ENSMUSG00000020839	Tmigd1	transmembrane and immunoglobulin domain containing 1	346.165	423.04	0.818708	-0.28858	0.312975	1
ENSMUSG00000020840	Blmh	bleomycin hydrolase	514.168	579.999	0.886693	-0.173493	0.549508	1
ENSMUSG00000050944	Efcab5	EF-hand calcium binding domain 5	31.2076	47.8313	0.659569	-0.600403	0.337523	1
ENSMUSG00000037926	Ssh2	slingshot homolog 2 (Drosophila)	1390.93	1692.52	0.821916	-0.282937	0.338144	1
ENSMUSG00000083899	Gm12346	predicted gene 12346	5843.35	6406.78	0.91207	-0.132783	0.614485	1
ENSMUSG00000020836	Coro6	coronin 6	28.9643	34.2171	0.850848	-0.233027	0.608627	1
ENSMUSG00000000686	Abhd15	abhydrolase domain containing 15	11.8791	18.5755	0.65792	-0.604015	0.527096	1
ENSMUSG00000017291	Taok1	TAO kinase 1	2740.54	2836.77	0.966088	-0.0497735	0.811551	1
ENSMUSG00000000724	Cryba1	crystallin, beta A1	17.9884	19.4345	0.929232	-0.105889	0.768465	1
ENSMUSG00000000631	Myo18a	myosin XVIIIA	5564.93	6309.04	0.882075	-0.181027	0.475771	1
ENSMUSG00000069804	Gm10277	predicted gene 10277	105.882	120.481	0.879823	-0.184715	0.745126	1
ENSMUSG00000000632	Sez6	seizure related gene 6	0	3.60235	0.21728	-2.20237	0.334145	1
ENSMUSG00000037791	Phf12	PHD finger protein 12	785.736	840.134	0.935328	-0.0964564	0.755872	1
ENSMUSG00000087050	Dhrs13os	dehydrogenase/reductase (SDR family) member 13, opposite strand	2.81587	3.19066	0.910565	-0.135167	1	1
ENSMUSG00000020832	Eral1	Era (G-protein)-like 1 (E. coli)	135.401	145.7	0.929794	-0.105017	0.854414	1
ENSMUSG00000037750	Fam222b	family with sequence similarity 222, member B	280.556	291.072	0.963995	-0.0529022	0.832046	1
ENSMUSG00000017386	Traf4	TNF receptor associated factor 4	554.371	567.672	0.976611	-0.0341446	0.922506	1
ENSMUSG00000002052	Supt6	suppressor of Ty 6	2180.32	2428.59	0.897814	-0.155512	0.489075	1
ENSMUSG00000037593	BC030499	cDNA sequence BC030499	13.1965	15.0599	0.883972	-0.177927	0.746192	1
ENSMUSG00000002055	Spag5	sperm associated antigen 5	98.0095	108.968	0.900352	-0.15144	0.655528	1
ENSMUSG00000001105	Ift20	intraflagellar transport 20	285.751	340.523	0.839622	-0.252188	0.418141	1
ENSMUSG00000017376	Nlk	nemo like kinase	405.873	433.329	0.936786	-0.0942093	0.810179	1
ENSMUSG00000080180	Gm17235	predicted gene 17235	4.89832	5.00999	0.981419	-0.0270588	0.962048	1
ENSMUSG00000072640	Lyrm9	LYR motif containing 9	156.217	168.121	0.929612	-0.105299	0.811333	1
ENSMUSG00000020826	Nos2	nitric oxide synthase 2, inducible	22.5789	28.1717	0.808281	-0.307071	0.670926	1
ENSMUSG00000018334	Ksr1	kinase suppressor of ras 1	155.144	189.056	0.821569	-0.283547	0.398233	1
ENSMUSG00000085941	Gm11201	predicted gene 11201	2.465	6.26561	0.476904	-1.06823	0.410551	1
ENSMUSG00000017677	Wsb1	WD repeat and SOCS box-containing 1	969.594	1192.3	0.813367	-0.298022	0.199328	1
ENSMUSG00000020716	Nf1	neurofibromin 1	1459.41	1518.83	0.960907	-0.0575316	0.819174	1
ENSMUSG00000049612	Omg	oligodendrocyte myelin glycoprotein	19.6566	24.1043	0.822832	-0.28133	0.593472	1
ENSMUSG00000070354	Evi2	ecotropic viral integration site 2	263.482	292.002	0.902662	-0.147741	0.873	1
ENSMUSG00000078771	Evi2a	ecotropic viral integration site 2a	110.792	128.718	0.861807	-0.214563	0.720132	1
ENSMUSG00000086569	Rab11fip4os2	RAB11 family interacting protein 4 (class II), opposite strand 2	4.93	5.4038	0.926012	-0.110898	0.923017	1
ENSMUSG00000065489	Mir365-2	microRNA 365-2	0.382542	6.08692	0.195084	-2.35783	0.304658	1
ENSMUSG00000017548	Suz12	suppressor of zeste 12 homolog (Drosophila)	487.2	511.562	0.952469	-0.0702554	0.7529	1
ENSMUSG00000017550	Atad5	ATPase family, AAA domain containing 5	73.4229	92.3594	0.797165	-0.327049	0.433465	1
ENSMUSG00000020707	Rnf135	ring finger protein 135	49.8547	64.3041	0.778737	-0.360792	0.485942	1
ENSMUSG00000017692	Rhbdl3	rhomboid, veinlet-like 3 (Drosophila)	35.2751	44.6543	0.79456	-0.331772	0.479442	1
ENSMUSG00000017421	Zfp207	zinc finger protein 207	1078.05	1119.98	0.962597	-0.0549959	0.870766	1
ENSMUSG00000017428	Psmd11	proteasome (prosome, macropain) 26S subunit, non-ATPase, 11	474.683	600.037	0.791436	-0.337456	0.186691	1
ENSMUSG00000035441	Myo1d	myosin ID	1322.27	1375.59	0.961269	-0.0569878	0.774	1
ENSMUSG00000020704	Asic2	acid-sensing (proton-gated) ion channel 2	1.04123	8.25508	0.220552	-2.18081	0.320982	1
ENSMUSG00000035385	Ccl2	chemokine (C-C motif) ligand 2	124.138	135.789	0.914824	-0.128434	0.797084	1
ENSMUSG00000020676	Ccl11	chemokine (C-C motif) ligand 11	2.6778	7.99809	0.408731	-1.29078	0.468203	1
ENSMUSG00000009185	Ccl8	chemokine (C-C motif) ligand 8	11.6777	23.3257	0.521164	-0.94019	0.308385	1
ENSMUSG00000020698	Cct6b	chaperonin containing Tcp1, subunit 6b (zeta)	2.32693	13.9834	0.222041	-2.1711	0.0417088	1
ENSMUSG00000046010	Zfp830	zinc finger protein 830	247.309	282.265	0.876595	-0.190018	0.608321	1
ENSMUSG00000085175	Gm11423	predicted gene 11423	13.4409	23.7915	0.582496	-0.779679	0.276588	1
ENSMUSG00000020697	Lig3	ligase III, DNA, ATP-dependent	326.721	335.586	0.973663	-0.038506	0.897915	1
ENSMUSG00000020696	Rffl	ring finger and FYVE like domain containing protein	295.058	307.73	0.958955	-0.0604645	0.895124	1
ENSMUSG00000018841	Rad51d	RAD51 paralog D	131.947	148.883	0.887003	-0.172989	0.572576	1
ENSMUSG00000018845	Unc45b	unc-45 myosin chaperone B	72.8592	89.0992	0.819754	-0.286737	0.597897	1
ENSMUSG00000054404	Slfn5	schlafen 5	1353.7	1469.77	0.921082	-0.118599	0.647114	1
ENSMUSG00000082726	Gm11424	predicted gene 11424	4.51578	5.81516	0.80934	-0.305182	0.818479	1
ENSMUSG00000072621	Slfn10-ps	schlafen 10, pseudogene	19.3285	21.1913	0.916058	-0.126489	0.998793	1
ENSMUSG00000072620	Slfn2	schlafen 2	330.784	338.153	0.978273	-0.0316911	0.948529	1
ENSMUSG00000078763	Slfn1	schlafen 1	19.3285	32.7338	0.602617	-0.730688	0.646535	1
ENSMUSG00000000204	Slfn4	schlafen 4	48.526	52.4937	0.925828	-0.111184	0.88489	1
ENSMUSG00000087107	AI662270	expressed sequence AI662270	57.6753	71.957	0.804245	-0.314294	0.66513	1
ENSMUSG00000083161	Gm11427	predicted gene 11427	9.13796	15.5306	0.613283	-0.705374	0.481627	1
ENSMUSG00000064856	Gm23444	predicted gene, 23444	3.36815	4.28235	0.826934	-0.274156	0.925844	1
ENSMUSG00000077217	Gm23951	predicted gene, 23951	1.56184	4.48492	0.46707	-1.09829	0.57087	1
ENSMUSG00000020686	Gas2l2	growth arrest-specific 2 like 2	0	3.87377	0.20518	-2.28504	0.190901	1
ENSMUSG00000020680	Taf15	TATA-box binding protein associated factor 15	756.746	783.388	0.966035	-0.049853	0.859537	1
ENSMUSG00000035042	Ccl5	chemokine (C-C motif) ligand 5	62.4266	83.55	0.750167	-0.414716	0.808433	1
ENSMUSG00000019122	Ccl9	chemokine (C-C motif) ligand 9	125.435	189.452	0.663866	-0.591037	0.179993	1
ENSMUSG00000051832	E230016K23Rik	RIKEN cDNA E230016K23 gene	17.16	18.164	0.947608	-0.0776375	0.967507	1
ENSMUSG00000018927	Ccl6	chemokine (C-C motif) ligand 6	169.454	189.368	0.895392	-0.159408	0.790306	1
ENSMUSG00000000976	Heatr6	HEAT repeat containing 6	256.881	314.696	0.816867	-0.291826	0.320617	1
ENSMUSG00000081342	Gm11434	predicted gene 11434	2.5714	3.6681	0.765065	-0.386346	0.904626	1
ENSMUSG00000085235	Gm12576	predicted gene 12576	70.3715	96.4555	0.732349	-0.449397	0.239753	1
ENSMUSG00000020679	Hnf1b	HNF1 homeobox B	1597.22	1715.65	0.931012	-0.103128	0.774104	1
ENSMUSG00000020677	Ddx52	DEAD (Asp-Glu-Ala-Asp) box polypeptide 52	292.978	359.172	0.816216	-0.292977	0.42036	1
ENSMUSG00000034940	Synrg	synergin, gamma	882.434	977.19	0.903131	-0.146992	0.538465	1
ENSMUSG00000018697	Aatf	apoptosis antagonizing transcription factor	380.412	407.877	0.932828	-0.100317	0.697101	1
ENSMUSG00000018698	Lhx1	LIM homeobox protein 1	310.168	365.15	0.849837	-0.234743	0.455872	1
ENSMUSG00000034449	Dhrs11	dehydrogenase/reductase (SDR family) member 11	114.097	139.842	0.817205	-0.29123	0.584254	1
ENSMUSG00000086799	4930502E09Rik	RIKEN cDNA 4930502E09 gene	2.32693	5.75841	0.492265	-1.02249	0.528897	1
ENSMUSG00000020530	Ggnbp2	gametogenetin binding protein 2	1012.37	1024.06	0.988599	-0.016542	0.893728	1
ENSMUSG00000045140	Pigw	phosphatidylinositol glycan anchor biosynthesis, class W	39.6642	58.4172	0.684383	-0.547124	0.203605	1
ENSMUSG00000020527	Myo19	myosin XIX	652.233	699.741	0.932203	-0.101284	0.725746	1
ENSMUSG00000092644	Gm23564	predicted gene, 23564	1.66824	2.7883	0.704337	-0.505663	0.9285	1
ENSMUSG00000020526	Znhit3	zinc finger, HIT type 3	40.6534	44.7615	0.910229	-0.135698	0.823336	1
ENSMUSG00000000805	Car4	carbonic anhydrase 4	986.629	1129.61	0.873538	-0.195057	0.601981	1
ENSMUSG00000000804	Usp32	ubiquitin specific peptidase 32	1213.22	1218.51	0.995661	-0.00627386	0.970587	1
ENSMUSG00000083876	Gm11439	predicted gene 11439	4.59051	10.3783	0.491332	-1.02523	0.537923	1
ENSMUSG00000082806	Rpl13-ps1	ribosomal protein L13, pseudogene 1	7.22525	7.88204	0.926054	-0.110831	0.959809	1
ENSMUSG00000080791	Akirin1-ps	akirin 1, pseudogene	0.765084	5.8628	0.257196	-1.95906	0.263712	1
ENSMUSG00000085628	Appbp2os	amyloid beta precursor protein (cytoplasmic tail) binding protein 2, opposite strand	1.2857	6.78712	0.293523	-1.76846	0.293908	1
ENSMUSG00000020525	Ppm1d	protein phosphatase 1D magnesium-dependent, delta isoform	175.341	228.949	0.766872	-0.382942	0.227928	1
ENSMUSG00000086199	Bcas3os1	breast carcinoma amplified sequence 3, opposite strand 1	41.8758	45.5616	0.920839	-0.118979	0.871338	1
ENSMUSG00000085514	Bcas3os2	breast carcinoma amplified sequence 3 opposite strand 2	1.53017	6.1792	0.35243	-1.50459	0.402115	1
ENSMUSG00000089508	Gm23473	predicted gene, 23473	6.98078	8.1147	0.875594	-0.191666	0.858279	1
ENSMUSG00000087013	2610027K06Rik	RIKEN cDNA 2610027K06 gene	31.8549	33.9043	0.941286	-0.0872954	0.818076	1
ENSMUSG00000000093	Tbx2	T-box 2	913.578	943.951	0.967858	-0.0471333	0.837801	1
ENSMUSG00000069785	Gm11444	predicted gene 11444	0.382542	5.22201	0.222202	-2.17006	0.345515	1
ENSMUSG00000034297	Med13	mediator complex subunit 13	2374.85	2398	0.990353	-0.0139854	0.981919	1
ENSMUSG00000020521	Rnft1	ring finger protein, transmembrane 1	200.63	241.69	0.830812	-0.267406	0.431992	1
ENSMUSG00000020513	Tubd1	tubulin, delta 1	28.2423	46.7691	0.612159	-0.708021	0.243215	1
ENSMUSG00000018171	Vmp1	vacuole membrane protein 1	970.851	1010.31	0.960984	-0.0574158	0.836794	1
ENSMUSG00000072582	Ptrh2	peptidyl-tRNA hydrolase 2	139.629	144.878	0.96402	-0.0528643	0.980182	1
ENSMUSG00000018427	Ypel2	yippee-like 2 (Drosophila)	240.391	280.476	0.857591	-0.221638	0.462893	1
ENSMUSG00000020493	Prr11	proline rich 11	7.99033	8.82979	0.914601	-0.128786	0.985059	1
ENSMUSG00000020492	Ska2	spindle and kinetochore associated complex subunit 2	23.3123	31.7688	0.741935	-0.430636	0.593757	1
ENSMUSG00000018548	Trim37	tripartite motif-containing 37	366.534	391.991	0.935223	-0.0966174	0.656839	1
ENSMUSG00000046442	Ppm1e	protein phosphatase 1E (PP2C domain containing)	73.2848	83.3795	0.880366	-0.183825	0.76505	1
ENSMUSG00000007646	Rad51c	RAD51 paralog C	6.94911	18.191	0.41421	-1.27156	0.181807	1
ENSMUSG00000070345	Hsf5	heat shock transcription factor family member 5	3.50623	5.21845	0.724655	-0.464634	0.784929	1
ENSMUSG00000034177	Rnf43	ring finger protein 43	174.588	185.242	0.942796	-0.0849827	0.855356	1
ENSMUSG00000020485	Supt4a	suppressor of Ty 4A	63.8707	94.9237	0.676274	-0.56432	0.248201	1
ENSMUSG00000065420	Mir142b	microRNA 142b	12.2933	19.876	0.636777	-0.651141	0.339744	1
ENSMUSG00000034156	Tspoap1	TSPO associated protein 1	149.584	169.266	0.884405	-0.17722	0.621643	1
ENSMUSG00000009356	Lpo	lactoperoxidase	0.765084	7.81007	0.200349	-2.31942	0.113542	1
ENSMUSG00000087373	Gm15892	predicted gene 15892	5.90788	11.5047	0.552422	-0.856157	0.47526	1
ENSMUSG00000018377	Vezf1	vascular endothelial zinc finger 1	975.709	1075.06	0.907671	-0.139759	0.612817	1
ENSMUSG00000018378	Cuedc1	CUE domain containing 1	326.212	416.785	0.783206	-0.352536	0.175851	1
ENSMUSG00000034031	Ccdc182	coiled-coil domain containing 182	1.53017	2.98809	0.63443	-0.656466	0.927741	1
ENSMUSG00000069769	Msi2	musashi RNA-binding protein 2	1916.72	2037.27	0.940859	-0.0879498	0.770014	1
ENSMUSG00000092985	Mir378b	microRNA 378b	6.18402	15.09	0.446491	-1.1633	0.228641	1
ENSMUSG00000085246	Gm15893	predicted gene 15893	35.6056	47.8994	0.748591	-0.41775	0.389859	1
ENSMUSG00000084411	Gm11510	predicted gene 11510	7.68252	23.4994	0.354397	-1.49656	0.0933961	1
ENSMUSG00000018428	Akap1	A kinase (PRKA) anchor protein 1	873.875	915.992	0.95407	-0.0678325	0.853907	1
ENSMUSG00000092399	4930556N13Rik	RIKEN cDNA 4930556N13 gene	8.37288	8.77083	0.959272	-0.0599889	0.992248	1
ENSMUSG00000087338	Scpep1os	serine carboxypeptidase 1, opposite strand	5.97123	6.58778	0.918743	-0.122266	0.905655	1
ENSMUSG00000000275	Trim25	tripartite motif-containing 25	1374.02	1379.53	0.996014	-0.00576199	0.959746	1
ENSMUSG00000020553	Pctp	phosphatidylcholine transfer protein	147.767	186.096	0.795137	-0.330724	0.273054	1
ENSMUSG00000069763	Tmem100	transmembrane protein 100	1.14763	5.76118	0.317641	-1.65453	0.556263	1
ENSMUSG00000020546	Stxbp4	syntaxin binding protein 4	371.7	483.378	0.76944	-0.37812	0.208097	1
ENSMUSG00000020544	Cox11	cytochrome c oxidase assembly protein 11	76.3224	81.0393	0.942505	-0.0854283	0.910435	1
ENSMUSG00000054079	Utp18	UTP18 small subunit processome component	231.496	251.844	0.919523	-0.121042	0.634264	1
ENSMUSG00000059474	Mbtd1	mbt domain containing 1	344.925	414.379	0.832792	-0.263972	0.309069	1
ENSMUSG00000020857	Nme2	NME/NM23 nucleoside diphosphate kinase 2	16.4379	19.9447	0.83257	-0.264356	0.85778	1
ENSMUSG00000020859	Spag9	sperm associated antigen 9	3716.48	4197.75	0.885377	-0.175636	0.429367	1
ENSMUSG00000086003	B230206L02Rik	RIKEN cDNA B230206L02 gene	22.717	29.3955	0.780279	-0.357939	0.547124	1
ENSMUSG00000037573	Tob1	transducer of ErbB-2.1	1706.16	1711.19	0.997062	-0.00424497	0.986758	1
ENSMUSG00000044177	Wfikkn2	WAP, follistatin/kazal, immunoglobulin, kunitz and netrin domain containing 2	3.71902	4.98889	0.787963	-0.343801	0.960776	1
ENSMUSG00000020863	Luc7l3	LUC7-like 3 (S. cerevisiae)	1840.81	1963	0.937786	-0.0926694	0.640729	1
ENSMUSG00000020866	Cacna1g	calcium channel, voltage-dependent, T type, alpha 1G subunit	60.4278	91.0564	0.667285	-0.583625	0.203529	1
ENSMUSG00000010080	Epn3	epsin 3	591.914	645.217	0.917515	-0.124196	0.686825	1
ENSMUSG00000039110	Mycbpap	MYCBP associated protein	141.074	163.799	0.862103	-0.214069	0.595132	1
ENSMUSG00000039084	Chad	chondroadherin	9.79665	14.383	0.701857	-0.510751	0.608452	1
ENSMUSG00000056008	Gm11541	predicted gene 11541	2.05078	4.36021	0.569154	-0.813109	0.786321	1
ENSMUSG00000020870	Cdc34b	cell division cycle 34B	12.3364	19.0055	0.666636	-0.58503	0.567389	1
ENSMUSG00000075611	Gm11545	predicted gene 11545	1.91271	4.34221	0.545226	-0.875075	0.697695	1
ENSMUSG00000001506	Col1a1	collagen, type I, alpha 1	708.352	1805.31	0.392708	-1.34847	0.11243	1
ENSMUSG00000001508	Sgca	sarcoglycan, alpha (dystrophin-associated glycoprotein)	6.15235	16.7925	0.401988	-1.31478	0.218449	1
ENSMUSG00000038976	Ppp1r9b	protein phosphatase 1, regulatory subunit 9B	1536.52	1777.34	0.86458	-0.209928	0.369567	1
ENSMUSG00000087630	Gm11513	predicted gene 11513	11.0076	16.3189	0.693324	-0.528399	0.595805	1
ENSMUSG00000001507	Itga3	integrin alpha 3	899.954	989.799	0.909321	-0.137139	0.501803	1
ENSMUSG00000020872	Tac4	tachykinin 4	3.88877	4.49702	0.889348	-0.169179	0.944976	1
ENSMUSG00000038909	Kat7	K(lysine) acetyltransferase 7	594.049	607.369	0.978105	-0.0319387	0.862971	1
ENSMUSG00000085143	Gm11520	predicted gene 11520	1.14763	2.8927	0.551707	-0.858027	0.820721	1
ENSMUSG00000020873	Slc35b1	solute carrier family 35, member B1	294.178	306.745	0.959164	-0.0601504	0.915814	1
ENSMUSG00000057522	Spop	speckle-type POZ protein	878.713	955.065	0.920139	-0.120077	0.596218	1
ENSMUSG00000083208	Gm11522	predicted gene 11522	1.53017	4.5209	0.458289	-1.12567	0.557296	1
ENSMUSG00000046719	Nxph3	neurexophilin 3	10.5301	13.3871	0.801415	-0.319379	0.769294	1
ENSMUSG00000075595	Zfp652	zinc finger protein 652	939.424	1037.09	0.905914	-0.142555	0.593909	1
ENSMUSG00000018381	Abi3	ABI gene family, member 3	68.8641	80.8901	0.853144	-0.229139	0.607746	1
ENSMUSG00000013415	Igf2bp1	insulin-like growth factor 2 mRNA binding protein 1	17.8187	32.5207	0.561405	-0.832887	0.511542	1
ENSMUSG00000006058	Snf8	SNF8, ESCRT-II complex subunit, homolog (S. cerevisiae)	188.112	190.986	0.985031	-0.0217591	0.877295	1
ENSMUSG00000038756	Ttll6	tubulin tyrosine ligase-like family, member 6	2.32693	3.01197	0.82925	-0.270122	0.951099	1
ENSMUSG00000038721	Hoxb7	homeobox B7	334.553	345.936	0.96719	-0.0481287	0.871185	1
ENSMUSG00000085645	Hoxb5os	homeobox B5 and homeobox B6, opposite strand	58.7799	65.8903	0.8937	-0.162138	0.808341	1
ENSMUSG00000038700	Hoxb5	homeobox B5	148.767	158.093	0.941381	-0.0871487	0.867194	1
ENSMUSG00000038692	Hoxb4	homeobox B4	427.567	545.382	0.784371	-0.350392	0.150409	1
ENSMUSG00000048763	Hoxb3	homeobox B3	92.645	108.837	0.852581	-0.23009	0.61029	1
ENSMUSG00000075589	Gm11536	predicted gene 11536	12.1983	13.2882	0.923722	-0.114469	0.940007	1
ENSMUSG00000084844	Hoxb3os	homeobox B3 and homeobox B2, opposite strand	124.541	133.911	0.930545	-0.103852	0.795211	1
ENSMUSG00000075588	Hoxb2	homeobox B2	38.5912	45.7229	0.847363	-0.238948	0.683052	1
ENSMUSG00000085242	Gm11537	predicted gene 11537	0.765084	4.05557	0.349136	-1.51814	0.449545	1
ENSMUSG00000020876	Snx11	sorting nexin 11	97.8715	113.975	0.859939	-0.217694	0.665748	1
ENSMUSG00000081249	Gm11517	predicted gene 11517	6.18402	15.9193	0.424604	-1.23581	0.37115	1
ENSMUSG00000038615	Nfe2l1	nuclear factor, erythroid derived 2,-like 1	3941.34	4235.25	0.930621	-0.103735	0.715094	1
ENSMUSG00000078700	D030028A08Rik	RIKEN cDNA D030028A08 gene	45.5517	77.1392	0.595754	-0.747211	0.111019	1
ENSMUSG00000018678	Sp2	Sp2 transcription factor	232.539	242.256	0.960053	-0.0588134	0.810149	1
ENSMUSG00000020878	Lrrc46	leucine rich repeat containing 46	12.4631	12.4776	0.998924	-0.00155354	0.959896	1
ENSMUSG00000081860	Gm11533	predicted gene 11533	0	3.35803	0.229462	-2.12368	0.260851	1
ENSMUSG00000001444	Tbx21	T-box 21	24.4283	56.3453	0.443424	-1.17324	0.355052	1
ENSMUSG00000001440	Kpnb1	karyopherin (importin) beta 1	1802.45	1817.48	0.991733	-0.0119758	1	1
ENSMUSG00000038485	Socs7	suppressor of cytokine signaling 7	392.124	480.342	0.816726	-0.292076	0.330105	1
ENSMUSG00000049807	Arhgap23	Rho GTPase activating protein 23	293.87	369.148	0.796627	-0.328024	0.341149	1
ENSMUSG00000043439	Epop	elongin BC and polycomb repressive complex 2 associated protein	13.5473	14.7403	0.924207	-0.113712	0.891786	1
ENSMUSG00000038437	Mllt6	myeloid/lymphoid or mixed-lineage leukemia; translocated to, 6	1757.06	1803.16	0.974449	-0.0373409	0.873647	1
ENSMUSG00000078695	Cisd3	CDGSH iron sulfur domain 3	96.7441	97.6539	0.990778	-0.0133667	0.956006	1
ENSMUSG00000069744	Psmb3	proteasome (prosome, macropain) subunit, beta type 3	87.2464	93.6533	0.932311	-0.101116	0.909991	1
ENSMUSG00000064901	Snora21	small nucleolar RNA, H/ACA box 21	564.283	616.427	0.915545	-0.127297	0.705374	1
ENSMUSG00000038366	Lasp1	LIM and SH3 protein 1	1409.18	1496.58	0.941641	-0.0867503	0.721388	1
ENSMUSG00000070336	Fbxo47	F-box protein 47	4.89832	10.3539	0.519496	-0.944816	0.468182	1
ENSMUSG00000017417	Plxdc1	plexin domain containing 1	12.2616	17.5651	0.714333	-0.485332	0.518055	1
ENSMUSG00000082715	Gm11633	predicted gene 11633	9.82832	14.2719	0.709035	-0.496071	0.652193	1
ENSMUSG00000038352	Arl5c	ADP-ribosylation factor-like 5C	86.5016	90.7722	0.953465	-0.0687477	0.795563	1
ENSMUSG00000020882	Cacnb1	calcium channel, voltage-dependent, beta 1 subunit	56.1768	75.4361	0.748034	-0.418824	0.401983	1
ENSMUSG00000017400	Stac2	SH3 and cysteine rich domain 2	4.20796	8.76138	0.533527	-0.906366	0.580564	1
ENSMUSG00000020883	Fbxl20	F-box and leucine-rich repeat protein 20	479.808	486.286	0.986704	-0.0193105	0.973229	1
ENSMUSG00000018160	Med1	mediator complex subunit 1	1129.55	1238.61	0.912019	-0.132864	0.549628	1
ENSMUSG00000003119	Cdk12	cyclin-dependent kinase 12	1198.09	1266.88	0.945743	-0.0804798	0.680637	1
ENSMUSG00000093673	Gm20644	predicted gene 20644	2.08246	6.99002	0.385788	-1.37412	0.67057	1
ENSMUSG00000061718	Ppp1r1b	protein phosphatase 1, regulatory (inhibitor) subunit 1B	456.488	497.698	0.917364	-0.124434	0.739418	1
ENSMUSG00000085944	1700003D09Rik	RIKEN cDNA 1700003D09 gene	1.80631	5.83626	0.410504	-1.28453	0.40773	1
ENSMUSG00000018167	Stard3	START domain containing 3	174.214	207.301	0.841158	-0.249551	0.384235	1
ENSMUSG00000007877	Tcap	titin-cap	2.43333	11.0011	0.286085	-1.80548	0.171092	1
ENSMUSG00000084835	Gm12352	predicted gene 12352	6.73631	12.8826	0.557267	-0.843559	0.411839	1
ENSMUSG00000018168	Ikzf3	IKAROS family zinc finger 3	146.527	188.486	0.778561	-0.361118	0.800751	1
ENSMUSG00000078134	Gm12355	predicted gene 12355	128.984	160.084	0.806932	-0.309481	0.44868	1
ENSMUSG00000078676	Casc3	cancer susceptibility candidate 3	548.318	574.323	0.954799	-0.0667305	0.814033	1
ENSMUSG00000038020	Rapgefl1	Rap guanine nucleotide exchange factor (GEF)-like 1	28.3804	38.6781	0.740469	-0.433489	0.424514	1
ENSMUSG00000017499	Cdc6	cell division cycle 6	12.5695	14.2782	0.888156	-0.171115	0.791634	1
ENSMUSG00000037992	Rara	retinoic acid receptor, alpha	605.26	653.76	0.925928	-0.111029	0.694131	1
ENSMUSG00000020914	Top2a	topoisomerase (DNA) II alpha	119.524	172.977	0.692763	-0.529567	0.240462	1
ENSMUSG00000017607	Tns4	tensin 4	28.1473	32.2756	0.875937	-0.191101	0.914905	1
ENSMUSG00000037944	Ccr7	chemokine (C-C motif) receptor 7	36.5632	86.7558	0.428043	-1.22417	0.391817	1
ENSMUSG00000019761	Krt10	keratin 10	52.15	58.4296	0.894336	-0.161112	0.830578	1
[truncated: 7,761 more rows]
