# Supplementary material for: Sex differences in transcriptomic profiles in aged kidney cells of renin lineage
Source: Aging (Albany NY). 2018 Apr 18;10(4):606–21. doi: 10.18632/aging.101416 (PMC5940125; doi:10.18632/aging.101416)
Supplement: Supplementary Table S5 [file aging-10-101416-s005.xlsx]

## Sheet: up_aged_female
Table S5 Differentially expressed genes, aged female vs. aged male mice CoRL, up in female/down in male
gene.id	gene.symbol	gene.name	Female	Male	foldChange	log2FoldChange	pval	padj
ENSMUSG00000048583	Igf2	insulin-like growth factor 2	1403.29	59.902	23.0581	4.5272	3.60672e-20	1.06094e-16
ENSMUSG00000005268	Prlr	prolactin receptor	1110.46	49.2092	22.1366	4.46836	2.14274e-13	3.39394e-10
ENSMUSG00000016918	Sulf1	sulfatase 1	363.68	35.7229	9.93059	3.31188	9.08403e-10	8.50224e-07
ENSMUSG00000090171	Ugt1a2	UDP glucuronosyltransferase 1 family, polypeptide A2	2285.79	7.93866	255.832	7.99905	8.80085e-10	8.50224e-07
ENSMUSG00000041445	Mmrn2	multimerin 2	4363.49	814.605	5.35123	2.41987	8.21229e-09	6.76397e-06
ENSMUSG00000026043	Col3a1	collagen, type III, alpha 1	2564.81	464.595	5.51082	2.46227	2.14091e-08	1.63272e-05
ENSMUSG00000062980	Cped1	cadherin-like and PC-esterase domain containing 1	798.539	134.549	5.8985	2.56035	2.7655e-08	2.03373e-05
ENSMUSG00000020717	Pecam1	platelet/endothelial cell adhesion molecule 1	6461.92	1270.35	5.08351	2.34582	3.46266e-08	2.45861e-05
ENSMUSG00000039167	Adgrl4	adhesion G protein-coupled receptor L4	4741.93	901.187	5.25715	2.39428	3.74855e-08	2.57288e-05
ENSMUSG00000030218	Mgp	matrix Gla protein	4351.22	831.726	5.22648	2.38584	6.39674e-08	4.00752e-05
ENSMUSG00000000957	Mmp14	matrix metallopeptidase 14 (membrane-inserted)	946.965	179.113	5.26316	2.39593	8.87655e-08	5.37579e-05
ENSMUSG00000014602	Kif1a	kinesin family member 1A	365.54	42.4053	8.44459	3.07803	1.0543e-07	6.03031e-05
ENSMUSG00000022687	Boc	biregional cell adhesion molecule-related/down-regulated by oncogenes (Cdon) binding protein	803.951	161.193	4.96293	2.31119	1.0984e-07	6.11272e-05
ENSMUSG00000032334	Loxl1	lysyl oxidase-like 1	378.964	65.5977	5.70536	2.51232	1.17432e-07	6.20009e-05
ENSMUSG00000041992	Rapgef5	Rap guanine nucleotide exchange factor (GEF) 5	1299.47	263.976	4.90788	2.2951	1.37565e-07	6.74429e-05
ENSMUSG00000028763	Hspg2	perlecan (heparan sulfate proteoglycan 2)	11094.1	2517.53	4.40536	2.13926	1.34807e-07	6.74429e-05
ENSMUSG00000036545	Adamts2	a disintegrin-like and metallopeptidase (reprolysin type) with thrombospondin type 1 motif, 2	347.072	54.5825	6.26225	2.64668	1.50188e-07	7.19189e-05
ENSMUSG00000001930	Vwf	Von Willebrand factor	665.577	120.741	5.47536	2.45295	1.66551e-07	7.7942e-05
ENSMUSG00000032537	Ephb1	Eph receptor B1	151.785	9.46608	14.5981	3.86771	1.80519e-07	8.26015e-05
ENSMUSG00000072812	Ahnak2	AHNAK nucleoprotein 2	300.752	48.7548	6.06477	2.60045	2.07222e-07	9.27587e-05
ENSMUSG00000016494	Cd34	CD34 antigen	1564.91	335.084	4.65928	2.22011	2.25565e-07	9.88216e-05
ENSMUSG00000020357	Flt4	FMS-like tyrosine kinase 4	1536.52	327.574	4.67939	2.22632	2.47559e-07	0.000106198
ENSMUSG00000019846	Lama4	laminin, alpha 4	755.874	141.035	5.32879	2.41381	2.8393e-07	0.000119314
ENSMUSG00000041577	Prelp	proline arginine-rich end leucine-rich repeat	426.185	72.644	5.80067	2.53622	3.22642e-07	0.000129701
ENSMUSG00000036446	Lum	lumican	427.44	60.7836	6.93452	2.7938	3.28151e-07	0.000129701
ENSMUSG00000062515	Fabp4	fatty acid binding protein 4, adipocyte	2030.17	439.177	4.61445	2.20616	3.35918e-07	0.000129701
ENSMUSG00000044562	Rasip1	Ras interacting protein 1	1024.8	228.292	4.47377	2.16149	3.36315e-07	0.000129701
ENSMUSG00000034684	Sema3f	sema domain, immunoglobulin domain (Ig), short basic domain, secreted, (semaphorin) 3F	1095.1	242.776	4.49635	2.16875	3.40141e-07	0.000129701
ENSMUSG00000071714	Csf2rb2	colony stimulating factor 2 receptor, beta 2, low-affinity (granulocyte-macrophage)	676.008	122.67	5.47429	2.45267	3.55235e-07	0.000132994
ENSMUSG00000029070	Mxra8	matrix-remodelling associated 8	469.821	87.3838	5.327	2.41332	4.28466e-07	0.000157545
ENSMUSG00000018593	Sparc	secreted acidic cysteine rich glycoprotein	3672.83	878.777	4.17587	2.06208	4.48085e-07	0.000159078
ENSMUSG00000022623	Shank3	SH3/ankyrin domain gene 3	3430.3	801.037	4.27823	2.09701	4.44761e-07	0.000159078
ENSMUSG00000022661	Cd200	CD200 antigen	1470.92	337.14	4.35299	2.12201	5.05235e-07	0.000176327
ENSMUSG00000006386	Tek	endothelial-specific receptor tyrosine kinase	3704.75	862.03	4.29388	2.10228	5.32323e-07	0.000182684
ENSMUSG00000033191	Tie1	tyrosine kinase with immunoglobulin-like and EGF-like domains 1	2458.17	603.91	4.06534	2.02338	7.45419e-07	0.000251622
ENSMUSG00000005397	Nid1	nidogen 1	1820.11	440.776	4.12225	2.04343	8.24389e-07	0.000258212
ENSMUSG00000027474	Ccm2l	cerebral cavernous malformation 2-like	401.422	76.8031	5.17231	2.37081	7.99476e-07	0.000258212
ENSMUSG00000031825	Crispld2	cysteine-rich secretory protein LCCL domain containing 2	304.201	56.8453	5.27615	2.39949	8.20371e-07	0.000258212
ENSMUSG00000032125	Robo4	roundabout guidance receptor 4	1171.67	271.772	4.29907	2.10402	7.79731e-07	0.000258212
ENSMUSG00000029163	Emilin1	elastin microfibril interfacer 1	1149.68	175.471	6.52053	2.70499	9.11786e-07	0.000280218
ENSMUSG00000024011	Pi16	peptidase inhibitor 16	1318.01	297.581	4.4176	2.14326	9.95958e-07	0.000301585
ENSMUSG00000021759	Plpp1	phospholipid phosphatase 1	3326.95	820.392	4.05159	2.01849	1.04877e-06	0.000312975
ENSMUSG00000055421	Pcdh9	protocadherin 9	130.954	15.93	7.79412	2.96239	1.172e-06	0.000339897
ENSMUSG00000025375	Aatk	apoptosis-associated tyrosine kinase	302.148	53.1122	5.6022	2.48599	1.44487e-06	0.000407553
ENSMUSG00000020154	Ptprb	protein tyrosine phosphatase, receptor type, B	14919.2	3620.03	4.12043	2.0428	1.54294e-06	0.00042361
ENSMUSG00000025608	Podxl	podocalyxin-like	11832.3	2804.07	4.21855	2.07675	1.52535e-06	0.00042361
ENSMUSG00000049872	Fam26e	family with sequence similarity 26, member E	71.0436	2.45704	20.8397	4.38126	1.69367e-06	0.000455048
ENSMUSG00000002504	Slc9a3r2	solute carrier family 9 (sodium/hydrogen exchanger), member 3 regulator 2	3724.52	966.661	3.85003	1.94487	1.73794e-06	0.000455048
ENSMUSG00000045333	Zfp423	zinc finger protein 423	286.987	55.8898	5.06219	2.33976	1.70875e-06	0.000455048
ENSMUSG00000001946	Esam	endothelial cell-specific adhesion molecule	1549.05	398.384	3.88111	1.95647	1.74585e-06	0.000455048
ENSMUSG00000045930	Clec14a	C-type lectin domain family 14, member a	1589.94	396.275	4.00463	2.00167	1.79453e-06	0.000461889
ENSMUSG00000033788	Dysf	dysferlin	2626.37	670.678	3.91165	1.96778	1.82055e-06	0.000462802
ENSMUSG00000007682	Dio2	deiodinase, iodothyronine, type II	96.1792	9.08239	9.6385	3.26881	2.20079e-06	0.000533136
ENSMUSG00000059588	Calcrl	calcitonin receptor-like	2898.93	604.75	4.78734	2.25922	2.17588e-06	0.000533136
ENSMUSG00000074743	Thbd	thrombomodulin	2795.78	736.292	3.79331	1.92346	2.15776e-06	0.000533136
ENSMUSG00000031465	Angpt2	angiopoietin 2	832.323	205.972	4.02626	2.00944	2.23541e-06	0.000535226
ENSMUSG00000031740	Mmp2	matrix metallopeptidase 2	338.532	72.5863	4.61406	2.20604	2.28997e-06	0.000541986
ENSMUSG00000026814	Eng	endoglin	5937.28	1572.11	3.77487	1.91643	2.35372e-06	0.000550745
ENSMUSG00000059336	Slc14a1	solute carrier family 14 (urea transporter), member 1	490.349	101.088	4.813	2.26694	2.52659e-06	0.00058455
ENSMUSG00000019929	Dcn	decorin	1556.71	351.983	4.413	2.14176	2.64697e-06	0.000605598
ENSMUSG00000039385	Cdh6	cadherin 6	534.378	80.6759	6.5549	2.71257	3.25586e-06	0.000728711
ENSMUSG00000025969	Nrp2	neuropilin 2	1480.51	385.815	3.83003	1.93736	3.37624e-06	0.00073179
ENSMUSG00000034911	Ushbp1	USH1 protein network component harmonin binding protein 1	1221.82	296.618	4.10867	2.03867	3.48197e-06	0.000746847
ENSMUSG00000039706	Ldb2	LIM domain binding 2	586.277	141.088	4.13318	2.04725	3.65523e-06	0.000775926
ENSMUSG00000021294	Kif26a	kinesin family member 26A	442.24	98.1733	4.46935	2.16006	3.92875e-06	0.000825478
ENSMUSG00000054690	Emcn	endomucin	2940.23	777.216	3.77946	1.91818	4.16834e-06	0.00085772
ENSMUSG00000035407	Kank4	KN motif and ankyrin repeat domains 4	666.33	142.175	4.66095	2.22062	4.20717e-06	0.00085772
ENSMUSG00000057722	Lepr	leptin receptor	333.899	68.4701	4.82076	2.26926	4.136e-06	0.00085772
ENSMUSG00000021903	Galnt15	UDP-N-acetyl-alpha-D-galactosamine:polypeptide N-acetylgalactosaminyltransferase 15	765.411	178.058	4.28024	2.09769	4.42489e-06	0.000893264
ENSMUSG00000042804	Gpr153	G protein-coupled receptor 153	142.621	20.1992	6.77486	2.76019	4.53206e-06	0.000897304
ENSMUSG00000060594	Layn	layilin	202.841	36.3478	5.45792	2.44835	4.49662e-06	0.000897304
ENSMUSG00000030306	Tmtc1	transmembrane and tetratricopeptide repeat containing 1	1555.64	425.239	3.65203	1.8687	5.07697e-06	0.000995618
ENSMUSG00000039661	Dusp26	dual specificity phosphatase 26 (putative)	138.928	18.5521	7.15664	2.83928	5.15484e-06	0.00100135
ENSMUSG00000042961	Egflam	EGF-like, fibronectin type III and laminin G domains	222.951	42.4555	5.15357	2.36557	5.27738e-06	0.00101557
ENSMUSG00000011263	Exoc3l2	exocyst complex component 3-like 2	1170.34	301.013	3.87843	1.95547	5.34515e-06	0.00101909
ENSMUSG00000056492	Adgrf5	adhesion G protein-coupled receptor F5	13947.6	3396.99	4.10496	2.03737	6.44866e-06	0.00120713
ENSMUSG00000001494	Sost	sclerostin	219.27	46.1506	4.67163	2.22393	6.66212e-06	0.00122873
ENSMUSG00000031523	Dlc1	deleted in liver cancer 1	4531.92	1102.82	4.10657	2.03794	6.68341e-06	0.00122873
ENSMUSG00000015468	Notch4	notch 4	2316.19	595.179	3.88673	1.95856	6.81432e-06	0.00124171
ENSMUSG00000002265	Peg3	paternally expressed 3	1016.27	274.823	3.68813	1.88289	7.37383e-06	0.0013203
ENSMUSG00000022537	Tmem44	transmembrane protein 44	721.575	182.082	3.94673	1.98066	7.57373e-06	0.00132162
ENSMUSG00000024440	Pcdh12	protocadherin 12	533.432	133.621	3.9699	1.9891	7.46125e-06	0.00132162
ENSMUSG00000062960	Kdr	kinase insert domain protein receptor	7984.75	2201.27	3.62614	1.85844	7.91244e-06	0.00136912
ENSMUSG00000020057	Dram1	DNA-damage regulated autophagy modulator 1	594.598	129.009	4.5812	2.19573	8.39457e-06	0.00142853
ENSMUSG00000022665	Ccdc80	coiled-coil domain containing 80	878.27	129.03	6.76206	2.75746	8.36994e-06	0.00142853
ENSMUSG00000025776	Crispld1	cysteine-rich secretory protein LCCL domain containing 1	432.278	106.897	4.01565	2.00563	9.28262e-06	0.00155397
ENSMUSG00000001739	Cldn15	claudin 15	455.773	111.209	4.07072	2.02529	9.80169e-06	0.00162412
ENSMUSG00000030653	Gm45837	predicted gene 45837	2598.61	720.973	3.6007	1.84828	9.85943e-06	0.00162412
ENSMUSG00000027435	Cd93	CD93 antigen	5599.54	1545.09	3.62239	1.85694	9.9579e-06	0.00162733
ENSMUSG00000029675	Eln	elastin	329.31	55.2922	5.86778	2.55282	1.02199e-05	0.00165699
ENSMUSG00000052921	Arhgef15	Rho guanine nucleotide exchange factor (GEF) 15	1341.2	362.416	3.69329	1.88491	1.04924e-05	0.00168788
ENSMUSG00000020598	Nrcam	neuronal cell adhesion molecule	119.346	21.3263	5.39029	2.43036	1.07344e-05	0.00171342
ENSMUSG00000030862	Cpxm2	carboxypeptidase X 2 (M14 family)	181.29	34.0799	5.19642	2.37752	1.08288e-05	0.0017152
ENSMUSG00000015354	Pcolce2	procollagen C-endopeptidase enhancer 2	112.911	15.7773	6.78956	2.76332	1.10696e-05	0.00173996
ENSMUSG00000066319	Rtp3	receptor transporter protein 3	234.804	37.5499	6.11686	2.61279	1.12216e-05	0.00175049
ENSMUSG00000024743	Syt7	synaptotagmin VII	402.194	66.5648	5.96751	2.57713	1.1463e-05	0.00177469
ENSMUSG00000036103	Colec12	collectin sub-family member 12	298.615	66.3634	4.44774	2.15307	1.19558e-05	0.00182357
ENSMUSG00000025892	Gria4	glutamate receptor, ionotropic, AMPA4 (alpha 4)	123.13	18.0303	6.52273	2.70548	1.19114e-05	0.00182357
ENSMUSG00000031871	Cdh5	cadherin 5	6286.75	1319.66	4.76106	2.25128	1.23881e-05	0.00187562
ENSMUSG00000034037	Fgd5	FYVE, RhoGEF and PH domain containing 5	3423.21	846.478	4.04047	2.01452	1.28451e-05	0.00191662
ENSMUSG00000034810	Scn7a	sodium channel, voltage-gated, type VII, alpha	260.609	52.2443	4.91337	2.29671	1.30288e-05	0.00193005
ENSMUSG00000029648	Flt1	FMS-like tyrosine kinase 1	8518.99	2534.8	3.35988	1.74841	1.43401e-05	0.00209416
ENSMUSG00000022122	Ednrb	endothelin receptor type B	1488.18	427.477	3.47551	1.79723	1.50391e-05	0.00218077
ENSMUSG00000042436	Mfap4	microfibrillar-associated protein 4	265.925	45.1863	5.77931	2.5309	1.55338e-05	0.00223676
ENSMUSG00000036862	Dchs1	dachsous 1 (Drosophila)	647.25	177.236	3.63704	1.86276	1.62968e-05	0.00233033
ENSMUSG00000055254	Ntrk2	neurotrophic tyrosine kinase, receptor, type 2	71.1594	5.17084	11.6936	3.54765	1.65695e-05	0.00235298
ENSMUSG00000031480	Thsd1	thrombospondin, type I, domain 1	212.346	44.9389	4.64412	2.21541	1.8356e-05	0.00255384
ENSMUSG00000020151	Ptprr	protein tyrosine phosphatase, receptor type, R	119.796	18.1261	6.31575	2.65895	1.85552e-05	0.00256423
ENSMUSG00000034738	Nostrin	nitric oxide synthase trafficker	344.645	84.25	4.05449	2.01952	2.21447e-05	0.00301247
ENSMUSG00000030411	Nova2	neuro-oncological ventral antigen 2	393.713	98.0358	3.98556	1.99478	2.23151e-05	0.00301247
ENSMUSG00000043251	Exoc3l	exocyst complex component 3-like	199.842	44.2281	4.44066	2.15077	2.23839e-05	0.00301247
ENSMUSG00000026837	Col5a1	collagen, type V, alpha 1	342.464	83.0613	4.08587	2.03064	2.41383e-05	0.00320665
ENSMUSG00000050105	Grrp1	glycine/arginine rich protein 1	343.171	59.3511	5.70282	2.51168	2.48109e-05	0.00327488
ENSMUSG00000024168	Tmem204	transmembrane protein 204	703.654	191.376	3.6629	1.87299	2.50879e-05	0.00329034
ENSMUSG00000020473	Aebp1	AE binding protein 1	3014.73	942.906	3.19494	1.67579	2.59344e-05	0.00335859
ENSMUSG00000074793	Hspa12b	heat shock protein 12B	465.715	121.141	3.82113	1.934	2.59093e-05	0.00335859
ENSMUSG00000050910	Cdr2l	cerebellar degeneration-related protein 2-like	264.676	66.4421	3.93932	1.97795	2.61723e-05	0.00336821
ENSMUSG00000022816	Fstl1	follistatin-like 1	1800.38	362.936	4.94972	2.30735	2.68011e-05	0.00338565
ENSMUSG00000022799	Arhgap31	Rho GTPase activating protein 31	4183.81	1208.01	3.46136	1.79134	2.67979e-05	0.00338565
ENSMUSG00000038776	Ephx1	epoxide hydrolase 1, microsomal	2175.81	616.232	3.52672	1.81833	2.81198e-05	0.00353058
ENSMUSG00000054757	Akr1c20	aldo-keto reductase family 1, member C20	52.266	2.26503	16.3141	4.02805	2.84606e-05	0.0035517
ENSMUSG00000019899	Lama2	laminin, alpha 2	509.603	139.529	3.63343	1.86133	2.87314e-05	0.00356391
ENSMUSG00000035258	Abi3bp	ABI gene family, member 3 (NESH) binding protein	295.545	69.6563	4.19701	2.06936	2.91443e-05	0.00359347
ENSMUSG00000022438	Parvb	parvin, beta	691.864	186.908	3.68726	1.88255	2.98937e-05	0.00366394
ENSMUSG00000024164	C3	complement component 3	3681.39	1196.9	3.07404	1.62014	3.02157e-05	0.00368149
ENSMUSG00000029484	Anxa3	annexin A3	523.721	137.675	3.78383	1.91985	3.13513e-05	0.00377518
ENSMUSG00000071176	Arhgef10	Rho guanine nucleotide exchange factor (GEF) 10	837.755	245.736	3.39941	1.76528	3.24113e-05	0.00388012
ENSMUSG00000022676	Snai2	snail family zinc finger 2	203.542	41.4505	4.81837	2.26855	3.38968e-05	0.0040345
ENSMUSG00000027210	Meis2	Meis homeobox 2	3560.51	774.689	4.59142	2.19894	3.58394e-05	0.00418107
ENSMUSG00000031870	Pgr	progesterone receptor	144.693	28.5439	4.93141	2.302	3.5668e-05	0.00418107
ENSMUSG00000020674	Pxdn	peroxidasin	1226.92	357.182	3.42822	1.77746	3.67443e-05	0.00425058
ENSMUSG00000046470	Sox18	SRY (sex determining region Y)-box 18	477.498	129.819	3.65772	1.87095	3.75436e-05	0.00431877
ENSMUSG00000027074	Slc43a3	solute carrier family 43, member 3	1056.14	322.13	3.27157	1.70998	3.8533e-05	0.00440796
ENSMUSG00000020810	Cygb	cytoglobin	483.149	87.0666	5.49753	2.45878	3.87493e-05	0.00440822
ENSMUSG00000036334	Igsf10	immunoglobulin superfamily, member 10	138.561	25.4622	5.27397	2.39889	3.99866e-05	0.00452398
ENSMUSG00000001227	Sema6b	sema domain, transmembrane domain (TM), and cytoplasmic domain, (semaphorin) 6B	403.076	105.145	3.80683	1.92859	4.28684e-05	0.0047973
ENSMUSG00000026921	Egfl7	EGF-like domain 7	1602.35	506.625	3.15853	1.65925	4.47296e-05	0.00497852
ENSMUSG00000029417	Cxcl9	chemokine (C-X-C motif) ligand 9	276.008	47.5355	5.70734	2.51282	4.73775e-05	0.00524489
ENSMUSG00000068196	Col8a1	collagen, type VIII, alpha 1	320.34	81.7758	3.88205	1.95682	4.81372e-05	0.0053005
ENSMUSG00000032766	Gng11	guanine nucleotide binding protein (G protein), gamma 11	336.974	69.3962	4.80103	2.26334	4.84799e-05	0.00530983
ENSMUSG00000041482	Piezo2	piezo-type mechanosensitive ion channel component 2	444.415	124.213	3.55725	1.83076	5.22093e-05	0.00568806
ENSMUSG00000032198	Dock6	dedicator of cytokinesis 6	2323	736.843	3.14972	1.65522	5.34034e-05	0.00575722
ENSMUSG00000041828	Abca8a	ATP-binding cassette, sub-family A (ABC1), member 8a	276.42	63.9187	4.27335	2.09537	5.55572e-05	0.00595822
ENSMUSG00000040987	Mill2	MHC I like leukocyte 2	173.883	36.5823	4.65334	2.21827	6.11804e-05	0.00652728
ENSMUSG00000038007	Acer2	alkaline ceramidase 2	1579.02	520.49	3.02981	1.59923	6.18761e-05	0.00656748
ENSMUSG00000058806	Col13a1	collagen, type XIII, alpha 1	41.1461	2.46809	12.1525	3.60318	6.2822e-05	0.00662549
ENSMUSG00000071001	Hrct1	histidine rich carboxyl terminus 1	72.6845	2.76782	19.5563	4.28956	6.30662e-05	0.00662549
ENSMUSG00000018845	Unc45b	unc-45 myosin chaperone B	146.952	30.1292	4.75284	2.24879	6.57584e-05	0.00687326
ENSMUSG00000003617	Cp	ceruloplasmin	1405.24	444.79	3.15448	1.6574	6.63629e-05	0.0069014
ENSMUSG00000029231	Pdgfra	platelet derived growth factor receptor, alpha polypeptide	502.325	151.647	3.29731	1.72129	6.73128e-05	0.00696501
ENSMUSG00000075254	Heg1	heart development protein with EGF-like domains 1	10440.7	2521.02	4.14022	2.04971	6.76836e-05	0.00696836
ENSMUSG00000056870	Gulp1	GULP, engulfment adaptor PTB domain containing 1	126.894	25.4765	4.83046	2.27216	6.81034e-05	0.0069767
ENSMUSG00000033880	Lgals3bp	lectin, galactoside-binding, soluble, 3 binding protein	2555.09	760.364	3.35725	1.74728	6.97941e-05	0.00709662
ENSMUSG00000031502	Col4a1	collagen, type IV, alpha 1	10875.2	3449.9	3.15169	1.65612	6.99633e-05	0.00709662
ENSMUSG00000032625	Thsd7a	thrombospondin, type I, domain containing 7A	1158.74	269.617	4.28554	2.09948	7.32429e-05	0.0073568
ENSMUSG00000025959	Klf7	Kruppel-like factor 7 (ubiquitous)	1147.9	339.002	3.3791	1.75664	7.4662e-05	0.00746294
ENSMUSG00000001555	Fkbp10	FK506 binding protein 10	131.83	26.1561	4.89133	2.29023	8.02415e-05	0.0079779
ENSMUSG00000000530	Acvrl1	activin A receptor, type II-like 1	1452.62	448.691	3.23248	1.69264	8.1199e-05	0.00799985
ENSMUSG00000027377	Mall	mal, T cell differentiation protein-like	63.5531	8.19525	7.02027	2.81153	8.53695e-05	0.00829172
ENSMUSG00000032718	Mansc1	MANSC domain containing 1	302.811	77.0505	3.89249	1.96069	8.51922e-05	0.00829172
ENSMUSG00000020642	Rnf144a	ring finger protein 144A	654.425	197.636	3.29963	1.7223	8.96965e-05	0.00863056
ENSMUSG00000023224	Serping1	serine (or cysteine) peptidase inhibitor, clade G, member 1	1564.79	191.012	8.15466	3.02763	8.96948e-05	0.00863056
ENSMUSG00000024087	Cyp1b1	cytochrome P450, family 1, subfamily b, polypeptide 1	439.306	133.602	3.27116	1.7098	9.21852e-05	0.00882877
ENSMUSG00000026365	Cfh	complement component factor h	3595.94	1067.4	3.36667	1.75132	9.44473e-05	0.00892094
ENSMUSG00000046280	She	src homology 2 domain-containing transforming protein E	1182.54	280.317	4.20714	2.07284	9.40215e-05	0.00892094
ENSMUSG00000044534	Ackr2	atypical chemokine receptor 2	92.7621	14.8938	5.89927	2.56054	9.36277e-05	0.00892094
ENSMUSG00000028339	Col15a1	collagen, type XV, alpha 1	831.912	254.695	3.25744	1.70374	9.94309e-05	0.00934878
ENSMUSG00000026879	Gsn	gelsolin	3498.04	1130.65	3.09199	1.62853	0.000106405	0.00991397
ENSMUSG00000050953	Gja1	gap junction protein, alpha 1	403.037	129.84	3.08803	1.62669	0.000109951	0.0101525
ENSMUSG00000055540	Epha6	Eph receptor A6	164.61	42.2203	3.83177	1.93801	0.000112715	0.0103152
ENSMUSG00000032028	Nxpe2	neurexophilin and PC-esterase domain family, member 2	115.208	17.8582	6.1622	2.62344	0.000112433	0.0103152
ENSMUSG00000052504	Epha3	Eph receptor A3	156.663	32.8743	4.65435	2.21858	0.000114334	0.010417
ENSMUSG00000026785	Pkn3	protein kinase N3	262.565	58.9491	4.39648	2.13635	0.000115276	0.0104566
ENSMUSG00000022324	Matn2	matrilin 2	284.863	73.8844	3.81739	1.93259	0.000128808	0.011582
ENSMUSG00000061535	C1qtnf7	C1q and tumor necrosis factor related protein 7	95.7415	18.4368	4.97725	2.31535	0.000131842	0.0117533
ENSMUSG00000029185	Fam114a1	family with sequence similarity 114, member A1	473.431	106.89	4.39734	2.13663	0.000136804	0.0119869
ENSMUSG00000028475	Spaar	small regulatory polypeptide of amino acid response	185.267	46.6047	3.91279	1.9682	0.000154916	0.0134028
ENSMUSG00000032698	Lmo2	LIM domain only 2	1167.41	327.102	3.56113	1.83233	0.000157868	0.0136011
ENSMUSG00000070469	Adamtsl3	ADAMTS-like 3	102.685	18.5217	5.31127	2.40906	0.000159151	0.0136545
ENSMUSG00000046916	Myct1	myc target 1	397.876	68.9611	5.7014	2.51132	0.000163456	0.0138769
ENSMUSG00000054580	Pla2r1	phospholipase A2 receptor 1	698.351	135.282	5.13164	2.35942	0.000163765	0.0138769
ENSMUSG00000030217	Art4	ADP-ribosyltransferase 4	79.8533	12.5064	5.98631	2.58167	0.000164908	0.0139165
ENSMUSG00000001240	Ramp2	receptor (calcitonin) activity modifying protein 2	686.864	209.354	3.27003	1.7093	0.000168271	0.0140849
ENSMUSG00000033377	Palmd	palmdelphin	683.801	119.531	5.68155	2.50629	0.000167672	0.0140849
ENSMUSG00000068079	Tcf15	transcription factor 15	54.8529	6.79043	7.16942	2.84186	0.000170199	0.0141313
ENSMUSG00000013584	Aldh1a2	aldehyde dehydrogenase family 1, subfamily A2	83.7016	14.5787	5.437	2.44281	0.00017975	0.0148644
ENSMUSG00000026566	Mpzl1	myelin protein zero-like 1	546.74	161.193	3.37708	1.75577	0.000184806	0.0152213
ENSMUSG00000012017	Scarf2	scavenger receptor class F, member 2	241.844	62.2271	3.84082	1.94142	0.000192994	0.0157073
ENSMUSG00000029084	Cd38	CD38 antigen	498.387	141.856	3.49574	1.8056	0.000192101	0.0157073
ENSMUSG00000006931	P3h4	prolyl 3-hydroxylase family member 4 (non-enzymatic)	149.301	34.94	4.182	2.06419	0.000195105	0.0158166
ENSMUSG00000008153	Clstn3	calsyntenin 3	26.3646	0.518172	18.0247	4.1719	0.000200695	0.0162059
ENSMUSG00000035934	Pknox2	Pbx/knotted 1 homeobox 2	110.735	16.9556	6.22285	2.63758	0.000205243	0.0165084
ENSMUSG00000022098	Bmp1	bone morphogenetic protein 1	257.437	67.1238	3.79363	1.92358	0.000206272	0.0165266
ENSMUSG00000024066	Xdh	xanthine dehydrogenase	2192.72	739.347	2.96309	1.5671	0.000207717	0.0165779
ENSMUSG00000034463	Scara3	scavenger receptor class A, member 3	78.045	12.8596	5.70326	2.51179	0.000209957	0.016692
ENSMUSG00000027955	Fam198b	family with sequence similarity 198, member B	341.749	44.6139	7.51413	2.90961	0.000219132	0.0173544
ENSMUSG00000020140	Lgr5	leucine rich repeat containing G protein coupled receptor 5	273.846	37.0003	7.23274	2.85454	0.000221777	0.0174966
ENSMUSG00000021614	Vcan	versican	222.404	53.5095	4.09844	2.03507	0.000222792	0.0175096
ENSMUSG00000026121	Sema4c	sema domain, immunoglobulin domain (Ig), transmembrane domain (TM) and short cytoplasmic domain, (semaphorin) 4C	801.493	258.13	3.09687	1.63081	0.00023332	0.0182673
ENSMUSG00000030353	Tead4	TEA domain family member 4	163.716	43.725	3.68286	1.88083	0.000235212	0.0183457
ENSMUSG00000020682	Mmp28	matrix metallopeptidase 28 (epilysin)	165.614	38.842	4.18188	2.06415	0.000241956	0.0187681
ENSMUSG00000060924	Csmd1	CUB and Sushi multiple domains 1	139.05	31.5616	4.30108	2.1047	0.000242451	0.0187681
ENSMUSG00000020092	Pald1	phosphatase domain containing, paladin 1	372.87	117.868	3.14524	1.65317	0.000247834	0.0191129
ENSMUSG00000024210	Ip6k3	inositol hexaphosphate kinase 3	99.7249	21.8455	4.40896	2.14044	0.000250139	0.0192187
ENSMUSG00000048200	Cracr2b	calcium release activated channel regulator 2B	326.524	105.492	3.07557	1.62086	0.000262561	0.0200981
ENSMUSG00000022610	Mapk12	mitogen-activated protein kinase 12	259.856	77.8927	3.30647	1.72529	0.00027115	0.0205266
ENSMUSG00000029260	Ugt2b34	UDP glucuronosyltransferase 2 family, polypeptide B34	536.695	127.644	4.17973	2.06341	0.000270799	0.0205266
ENSMUSG00000038264	Sema7a	sema domain, immunoglobulin domain (Ig), and GPI membrane anchor, (semaphorin) 7A	768.455	247.092	3.1015	1.63296	0.000274221	0.0206076
ENSMUSG00000004631	Sgce	sarcoglycan, epsilon	171.74	31.7418	5.27584	2.3994	0.000288068	0.0215343
ENSMUSG00000031990	Jam3	junction adhesion molecule 3	740.012	227.367	3.24483	1.69814	0.000288644	0.0215343
ENSMUSG00000020826	Nos2	nitric oxide synthase 2, inducible	65.4579	9.2473	6.48541	2.6972	0.000290272	0.0215636
ENSMUSG00000049044	Rapgef4	Rap guanine nucleotide exchange factor (GEF) 4	1041.35	198.357	5.22858	2.38642	0.000291132	0.0215636
ENSMUSG00000020185	E2f7	E2F transcription factor 7	51.8283	5.23591	8.47163	3.08264	0.000293511	0.021662
ENSMUSG00000020695	Mrc2	mannose receptor, C type 2	316.91	99.6194	3.15953	1.65971	0.000298406	0.0219446
ENSMUSG00000075044	Slc22a29	solute carrier family 22. member 29	198.485	18.3882	10.289	3.36303	0.000300771	0.0220397
ENSMUSG00000013076	Amotl1	angiomotin-like 1	3674.16	830.57	4.41954	2.1439	0.000302909	0.0221177
ENSMUSG00000040254	Sema3d	sema domain, immunoglobulin domain (Ig), short basic domain, secreted, (semaphorin) 3D	530.511	78.3831	6.69552	2.7432	0.000320838	0.0232104
ENSMUSG00000052776	Oas1a	2'-5' oligoadenylate synthetase 1A	283.653	65.2698	4.29536	2.10278	0.000321255	0.0232104
ENSMUSG00000063415	Cyp26b1	cytochrome P450, family 26, subfamily b, polypeptide 1	3026.84	585.143	5.1657	2.36896	0.000324402	0.0233558
ENSMUSG00000071856	Mcc	mutated in colorectal cancers	1129.56	359.695	3.1344	1.64819	0.000336314	0.0241291
ENSMUSG00000042099	Kank3	KN motif and ankyrin repeat domains 3	826.429	282.53	2.91832	1.54514	0.000353125	0.0251599
ENSMUSG00000045092	S1pr1	sphingosine-1-phosphate receptor 1	1492.8	522.065	2.85587	1.51393	0.000366366	0.0258246
ENSMUSG00000027962	Vcam1	vascular cell adhesion molecule 1	2624.77	927.592	2.82769	1.49962	0.000364361	0.0258246
ENSMUSG00000028037	Ifi44	interferon-induced protein 44	1466.14	319.526	4.57727	2.19449	0.000367114	0.0258246
ENSMUSG00000034990	Otoa	otoancorin	73.6563	10.4223	6.53601	2.70841	0.000368049	0.0258246
ENSMUSG00000056313	1810011O10Rik	RIKEN cDNA 1810011O10 gene	460.619	161.041	2.84878	1.51034	0.00036998	0.0258246
ENSMUSG00000033420	Antxr1	anthrax toxin receptor 1	503.328	122.165	4.09472	2.03377	0.000374623	0.0259118
ENSMUSG00000031673	Cdh11	cadherin 11	167.062	43.4118	3.78417	1.91998	0.000376263	0.0259118
ENSMUSG00000027931	Npr1	natriuretic peptide receptor 1	1713.64	316.75	5.39621	2.43195	0.000378162	0.0259403
ENSMUSG00000052726	Kcnt2	potassium channel, subfamily T, member 2	88.1352	18.3019	4.61794	2.20725	0.000393298	0.0266193
ENSMUSG00000017667	Zfp334	zinc finger protein 334	226.657	69.6212	3.22364	1.68869	0.00039321	0.0266193
ENSMUSG00000031503	Col4a2	collagen, type IV, alpha 2	7178.5	2591.68	2.76914	1.46944	0.000392481	0.0266193
ENSMUSG00000020032	Nuak1	NUAK family, SNF1-like kinase, 1	1512.98	349.149	4.32383	2.11231	0.000410405	0.0273786
ENSMUSG00000030516	Tjp1	tight junction protein 1	5002.47	1858.67	2.69051	1.42788	0.000410442	0.0273786
ENSMUSG00000028369	Svep1	sushi, von Willebrand factor type A, EGF and pentraxin domain containing 1	345.823	97.7105	3.51354	1.81293	0.000415842	0.0275765
ENSMUSG00000054422	Fabp1	fatty acid binding protein 1, liver	213.845	1.58161	83.2212	6.37888	0.000419226	0.0275792
ENSMUSG00000028715	Cyp4a14	cytochrome P450, family 4, subfamily a, polypeptide 14	2946.7	159.487	18.3672	4.19906	0.000436766	0.0286415
ENSMUSG00000021464	Ror2	receptor tyrosine kinase-like orphan receptor 2	82.2279	18.137	4.34905	2.1207	0.000440867	0.0287275
ENSMUSG00000008398	Elk3	ELK3, member of ETS oncogene family	1180.13	391.813	3.00686	1.58826	0.000448548	0.0290218
ENSMUSG00000049288	Lix1l	Lix1-like	306.961	72.31	4.20081	2.07067	0.000447367	0.0290218
ENSMUSG00000038156	Spon1	spondin 1, (f-spondin) extracellular matrix protein	794.118	197.867	3.99823	1.99936	0.000449611	0.0290218
ENSMUSG00000046743	Fat4	FAT atypical cadherin 4	1390.9	279.918	4.95485	2.30884	0.000455089	0.0292836
ENSMUSG00000036019	Tmtc2	transmembrane and tetratricopeptide repeat containing 2	156.418	36.7636	4.16852	2.05954	0.000471724	0.0302594
ENSMUSG00000020021	Fgd6	FYVE, RhoGEF and PH domain containing 6	647.314	212.688	3.03392	1.60118	0.000477043	0.0305056
ENSMUSG00000048330	Ric3	RIC3 acetylcholine receptor chaperone	329.381	104.776	3.12339	1.64311	0.000478917	0.0305306
ENSMUSG00000017309	Cd300lg	CD300 molecule like family member G	1264.47	455.796	2.77031	1.47005	0.000497749	0.0310689
ENSMUSG00000021318	Gli3	GLI-Kruppel family member GLI3	56.6161	7.89618	6.4765	2.69521	0.000492459	0.0310689
ENSMUSG00000021708	Rasgrf2	RAS protein-specific guanine nucleotide-releasing factor 2	473.74	162.359	2.90611	1.53909	0.000494007	0.0310689
ENSMUSG00000051669	AU021092	expressed sequence AU021092	795.56	294.463	2.69597	1.4308	0.000494753	0.0310689
ENSMUSG00000031803	B3gnt3	UDP-GlcNAc:betaGal beta-1,3-N-acetylglucosaminyltransferase 3	300.436	94.2232	3.16557	1.66247	0.000496798	0.0310689
ENSMUSG00000022579	Gpihbp1	GPI-anchored HDL-binding protein 1	536.167	187.695	2.84674	1.50931	0.000508991	0.0316635
ENSMUSG00000022587	Ly6e	lymphocyte antigen 6 complex, locus E	6307.29	2290.6	2.75278	1.46089	0.000514642	0.0319187
ENSMUSG00000070476	Fam217b	family with sequence similarity 217, member B	164.649	43.5112	3.72151	1.89589	0.000518043	0.0320331
ENSMUSG00000034771	Tle2	transducin-like enhancer of split 2	392.947	132.066	2.96054	1.56586	0.000531605	0.0326775
ENSMUSG00000028041	Adam15	a disintegrin and metallopeptidase domain 15 (metargidin)	1481.42	539.303	2.74368	1.45611	0.000531638	0.0326775
ENSMUSG00000025902	Sox17	SRY (sex determining region Y)-box 17	1070.2	259.459	4.11272	2.04009	0.000548802	0.0331775
ENSMUSG00000052534	Pbx1	pre B cell leukemia homeobox 1	4185.82	1514.95	2.76184	1.46563	0.000550468	0.0331775
ENSMUSG00000073411	H2-D1	histocompatibility 2, D region locus 1	9249.64	3161.14	2.92544	1.54865	0.000548315	0.0331775
ENSMUSG00000028517	Plpp3	phospholipid phosphatase 3	2935.27	1134.78	2.58524	1.3703	0.000547525	0.0331775
ENSMUSG00000029082	Bst1	bone marrow stromal cell antigen 1	290.848	92.8195	3.11074	1.63726	0.000550139	0.0331775
ENSMUSG00000030351	Tspan11	tetraspanin 11	88.4249	20.7132	4.11847	2.04211	0.000551051	0.0331775
ENSMUSG00000019539	Rcn3	reticulocalbin 3, EF-hand calcium binding domain	585.099	119.958	4.84547	2.27664	0.000545449	0.0331775
ENSMUSG00000026640	Plxna2	plexin A2	2174.51	820.121	2.64944	1.40569	0.000553743	0.0332148
ENSMUSG00000006362	Cbfa2t3	core-binding factor, runt domain, alpha subunit 2, translocated to, 3 (human)	1009.58	332.768	3.02781	1.59827	0.000554898	0.0332148
ENSMUSG00000006369	Fbln1	fibulin 1	783.244	135.49	5.74578	2.5225	0.000570182	0.0340307
ENSMUSG00000042834	Nrep	neuronal regeneration related protein	183.915	50.8862	3.56386	1.83344	0.00057733	0.0343578
ENSMUSG00000040605	Bace2	beta-site APP-cleaving enzyme 2	105.143	25.6803	3.97834	1.99217	0.00058397	0.0345532
ENSMUSG00000018001	Cyth3	cytohesin 3	1317.76	483.15	2.72386	1.44565	0.000595983	0.035163
ENSMUSG00000038094	Atp13a4	ATPase type 13A4	19.2346	0	20.2346	4.33875	0.000614485	0.0358438
ENSMUSG00000057604	Lmcd1	LIM and cysteine-rich domains 1	847.671	162.171	5.20111	2.37882	0.000612772	0.0358438
ENSMUSG00000048960	Prex2	phosphatidylinositol-3,4,5-trisphosphate-dependent Rac exchange factor 2	2882.9	932.681	3.08874	1.62702	0.000632192	0.0367725
ENSMUSG00000026185	Igfbp5	insulin-like growth factor binding protein 5	17774.9	6907.3	2.57312	1.36352	0.000642664	0.0372763
ENSMUSG00000052632	Asap2	ArfGAP with SH3 domain, ankyrin repeat and PH domain 2	1285.37	432.431	2.96789	1.56944	0.000654777	0.0378722
ENSMUSG00000041117	Ccdc8	coiled-coil domain containing 8	96.7775	17.6078	5.25465	2.3936	0.000663909	0.0381859
ENSMUSG00000020614	Fam20a	family with sequence similarity 20, member A	270.448	81.2842	3.29891	1.72199	0.000668371	0.0383354
ENSMUSG00000050493	Fam167b	family with sequence similarity 167, member B	320.887	76.149	4.17228	2.06084	0.000674619	0.0383731
ENSMUSG00000001123	Lgals9	lectin, galactose binding, soluble 9	846.262	215.066	3.9213	1.97133	0.000685481	0.0388084
ENSMUSG00000024534	Sncaip	synuclein, alpha interacting protein (synphilin)	261.774	54.6281	4.72376	2.23993	0.000686041	0.0388084
ENSMUSG00000073599	Ecscr	endothelial cell surface expressed chemotaxis and apoptosis regulator	571.611	115.173	4.92896	2.30128	0.000700675	0.0395277
ENSMUSG00000055172	C1ra	complement component 1, r subcomponent A	349.606	46.1721	7.43249	2.89385	0.000708679	0.03987
ENSMUSG00000030401	Rtn2	reticulon 2 (Z-band associated protein)	79.7824	16.2567	4.68123	2.22689	0.000712691	0.0399864
ENSMUSG00000063060	Sox7	SRY (sex determining region Y)-box 7	615.936	124.84	4.90253	2.29353	0.000736796	0.0409385
ENSMUSG00000040852	Plekhh2	pleckstrin homology domain containing, family H (with MyTH4 domain) member 2	165.022	50.1712	3.24444	1.69797	0.000737613	0.0409385
ENSMUSG00000006219	Fblim1	filamin binding LIM protein 1	230.956	70.9537	3.22369	1.68871	0.000740161	0.0409695
ENSMUSG00000085151	1110018N20Rik	RIKEN cDNA 1110018N20 gene	27.9155	0.737112	16.6457	4.05708	0.000746357	0.0412017
ENSMUSG00000048120	Entpd1	ectonucleoside triphosphate diphosphohydrolase 1	1665.08	594.639	2.79714	1.48395	0.000751428	0.0412604
ENSMUSG00000023036	Pcdhgc4	protocadherin gamma subfamily C, 4	2511.25	802.605	3.12623	1.64442	0.000754995	0.041346
ENSMUSG00000031737	Irx5	Iroquois related homeobox 5 (Drosophila)	178.124	51.9255	3.38445	1.75892	0.00077605	0.0422742
ENSMUSG00000066571	4931406P16Rik	RIKEN cDNA 4931406P16 gene	2098.82	784.37	2.67367	1.41882	0.000789248	0.0428276
ENSMUSG00000031824	6430548M08Rik	RIKEN cDNA 6430548M08 gene	1039.27	389.519	2.66382	1.4135	0.000790369	0.0428276
ENSMUSG00000021478	Drd1	dopamine receptor D1	20.0325	0	21.0325	4.39455	0.000802039	0.0430072
ENSMUSG00000037362	Nov	nephroblastoma overexpressed gene	219.308	0.641107	134.244	7.06871	0.000798416	0.0430072
ENSMUSG00000027293	Ehd4	EH-domain containing 4	3528.73	1348.45	2.61567	1.38718	0.000796862	0.0430072
ENSMUSG00000024940	Ltbp3	latent transforming growth factor beta binding protein 3	1025.81	412.928	2.48066	1.31072	0.000819517	0.0438303
ENSMUSG00000061353	Cxcl12	chemokine (C-X-C motif) ligand 12	676.594	242.359	2.78434	1.47734	0.000821869	0.0438423
ENSMUSG00000034164	Emid1	EMI domain containing 1	153.587	36.0072	4.1772	2.06254	0.000828524	0.044083
ENSMUSG00000030222	Rerg	RAS-like, estrogen-regulated, growth-inhibitor	66.3588	10.6257	5.79396	2.53455	0.000833164	0.0442157
ENSMUSG00000031790	Mmp15	matrix metallopeptidase 15	341.453	99.9713	3.39159	1.76196	0.000838626	0.0443911
ENSMUSG00000033569	Adgrb3	adhesion G protein-coupled receptor B3	48.2119	5.85042	7.18377	2.84474	0.000840833	0.0443938
ENSMUSG00000040488	Ltbp4	latent transforming growth factor beta binding protein 4	2842.66	627.68	4.52322	2.17735	0.000859521	0.0452645
ENSMUSG00000021256	Vash1	vasohibin 1	122.57	31.4926	3.80301	1.92714	0.000873742	0.0457792
ENSMUSG00000086328	2700033N17Rik	RIKEN cDNA 2700033N17 gene	61.0627	9.65792	5.82315	2.5418	0.00087297	0.0457792
ENSMUSG00000044469	Tnfaip8l1	tumor necrosis factor, alpha-induced protein 8-like 1	83.946	19.1772	4.21	2.07382	0.000890941	0.0465619
ENSMUSG00000030352	Tspan9	tetraspanin 9	1324.44	543.011	2.43643	1.28477	0.000897911	0.0468073
ENSMUSG00000046442	Ppm1e	protein phosphatase 1E (PP2C domain containing)	194.282	49.1164	3.89657	1.96221	0.000920734	0.0478759
ENSMUSG00000066456	Hmgn3	high mobility group nucleosomal binding domain 3	315.784	96.3001	3.25574	1.70298	0.000961259	0.0498571
ENSMUSG00000042918	Mamstr	MEF2 activating motif and SAP domain containing transcriptional regulator	134.623	42.7264	3.10161	1.63302	0.000975006	0.0504431
ENSMUSG00000085582	3110099E03Rik	RIKEN cDNA 3110099E03 gene	101.855	22.9977	4.28603	2.09964	0.000979282	0.0505373
ENSMUSG00000046186	Cd109	CD109 antigen	129.925	24.8207	5.07053	2.34214	0.000989762	0.0509505
ENSMUSG00000049420	Tmem200a	transmembrane protein 200A	24.0158	0.790806	13.969	3.80416	0.00104066	0.0534255
ENSMUSG00000020627	Klhl29	kelch-like 29	97.331	22.2605	4.22739	2.07977	0.00104852	0.0535733
ENSMUSG00000061080	Lsamp	limbic system-associated membrane protein	83.3153	17.5511	4.54503	2.18429	0.00105864	0.0536908
ENSMUSG00000033278	Ptprm	protein tyrosine phosphatase, receptor type, M	2646.78	707.57	3.73679	1.9018	0.00105389	0.0536908
ENSMUSG00000056214	Pard6g	par-6 family cell polarity regulator gamma	71.5713	15.1242	4.50078	2.17017	0.00108039	0.0543919
ENSMUSG00000009418	Nav1	neuron navigator 1	1594.11	605.657	2.62935	1.3947	0.00110313	0.0551784
ENSMUSG00000024810	Il33	interleukin 33	161.225	48.3634	3.28635	1.71649	0.00110405	0.0551784
ENSMUSG00000007877	Tcap	titin-cap	20.8948	0	21.8948	4.45251	0.00111541	0.0556112
ENSMUSG00000045680	Tcf21	transcription factor 21	65.0654	11.3205	5.36224	2.42283	0.00113883	0.0565049
ENSMUSG00000032363	Adamts7	a disintegrin-like and metallopeptidase (reprolysin type) with thrombospondin type 1 motif, 7	117.331	25.1443	4.52608	2.17826	0.00114672	0.0567597
ENSMUSG00000053062	Jam2	junction adhesion molecule 2	1513.55	256.44	5.88312	2.55658	0.00115063	0.0568169
ENSMUSG00000032186	Tmod2	tropomodulin 2	147.776	7.40494	17.701	4.14576	0.00115554	0.0569226
ENSMUSG00000045975	C2cd2	C2 calcium-dependent domain containing 2	1075.71	397.25	2.70359	1.43488	0.00116331	0.0571689
ENSMUSG00000033082	Clec1a	C-type lectin domain family 1, member a	825.477	317.87	2.59189	1.374	0.0011723	0.0574734
ENSMUSG00000079343	C1s2	complement component 1, s subcomponent 2	31.384	2.74073	8.65715	3.11389	0.00117701	0.0575673
ENSMUSG00000020363	Gfpt2	glutamine fructose-6-phosphate transaminase 2	126.572	34.6439	3.57908	1.83959	0.00118653	0.0575915
ENSMUSG00000017466	Timp2	tissue inhibitor of metalloproteinase 2	2247.13	871.601	2.57635	1.36533	0.00118498	0.0575915
ENSMUSG00000027583	Zbtb46	zinc finger and BTB domain containing 46	737.296	276.671	2.65888	1.41082	0.00118243	0.0575915
ENSMUSG00000046402	Rbp1	retinol binding protein 1, cellular	149.526	42.6182	3.451	1.78701	0.00118869	0.0575915
ENSMUSG00000028553	Angptl3	angiopoietin-like 3	338.616	67.3812	4.96651	2.31223	0.00119548	0.0577164
ENSMUSG00000022793	B4galt4	UDP-Gal:betaGlcNAc beta 1,4-galactosyltransferase, polypeptide 4	258.041	77.4967	3.30003	1.72248	0.00120275	0.0578641
ENSMUSG00000018217	Pmp22	peripheral myelin protein 22	631.87	236.29	2.66708	1.41526	0.00120994	0.0580627
ENSMUSG00000050919	Zfp366	zinc finger protein 366	548.149	209.485	2.60898	1.38348	0.00121534	0.0580627
ENSMUSG00000023868	Pde10a	phosphodiesterase 10A	203.285	73.7503	2.7329	1.45043	0.00121407	0.0580627
ENSMUSG00000040265	Dnm3	dynamin 3	1183.16	426.201	2.7719	1.47087	0.00122656	0.0583282
ENSMUSG00000037031	Tspan15	tetraspanin 15	365.958	141.027	2.58372	1.36945	0.00123701	0.0586897
ENSMUSG00000074934	Grem1	gremlin 1, DAN family BMP antagonist	55.831	9.57363	5.37478	2.42621	0.00124221	0.0588006
ENSMUSG00000002799	Jag2	jagged 2	852.021	167.508	5.0622	2.33977	0.00126942	0.0595677
ENSMUSG00000036617	Etl4	enhancer trap locus 4	2251.43	934.964	2.40653	1.26695	0.00127288	0.0595677
ENSMUSG00000015627	Gata5	GATA binding protein 5	89.8791	21.523	4.03494	2.01255	0.00126301	0.0595677
ENSMUSG00000027935	Rab13	RAB13, member RAS oncogene family	115.259	32.3904	3.48182	1.79984	0.00127128	0.0595677
ENSMUSG00000033152	Podxl2	podocalyxin-like 2	56.1205	6.1918	7.94245	2.98958	0.00127054	0.0595677
ENSMUSG00000034387	Ssu2	ssu-2 homolog (C. elegans)	60.5158	10.8289	5.20045	2.37864	0.00127681	0.0596163
ENSMUSG00000030107	Usp18	ubiquitin specific peptidase 18	427.844	79.4411	5.33116	2.41445	0.00128763	0.0599856
ENSMUSG00000024427	Spry4	sprouty homolog 4 (Drosophila)	668.659	237.443	2.80846	1.48978	0.00129347	0.0601217
ENSMUSG00000039542	Ncam1	neural cell adhesion molecule 1	297.546	63.3258	4.64116	2.21449	0.00130814	0.0606666
ENSMUSG00000019647	Sema6a	sema domain, transmembrane domain (TM), and cytoplasmic domain, (semaphorin) 6A	1554.66	606.673	2.56003	1.35616	0.00131319	0.0606822
ENSMUSG00000006675	P4htm	prolyl 4-hydroxylase, transmembrane (endoplasmic reticulum)	112.595	16.1225	6.63425	2.72993	0.00131437	0.0606822
ENSMUSG00000033855	Ston1	stonin 1	582.236	215.321	2.69616	1.43091	0.00131941	0.0606884
ENSMUSG00000039954	Stk32a	serine/threonine kinase 32A	169.379	54.6201	3.06325	1.61506	0.0013204	0.0606884
ENSMUSG00000079018	Ly6c1	lymphocyte antigen 6 complex, locus C1	1899.05	394.342	4.80609	2.26486	0.00133941	0.0612883
ENSMUSG00000034881	Tbxa2r	thromboxane A2 receptor	116.784	29.8607	3.81664	1.9323	0.00135402	0.0618197
ENSMUSG00000027875	Hmgcs2	3-hydroxy-3-methylglutaryl-Coenzyme A synthase 2	949.244	168.358	5.61086	2.48822	0.00136099	0.0620004
ENSMUSG00000026447	Pik3c2b	phosphatidylinositol-4-phosphate 3-kinase catalytic subunit type 2 beta	416.737	125.085	3.31314	1.7282	0.00137647	0.0624292
ENSMUSG00000046159	Chrm3	cholinergic receptor, muscarinic 3, cardiac	115.761	28.9592	3.89734	1.96249	0.00140178	0.0629408
ENSMUSG00000024420	Zfp521	zinc finger protein 521	249.116	87.2987	2.83261	1.50213	0.00139511	0.0629408
ENSMUSG00000027661	Slc2a10	solute carrier family 2 (facilitated glucose transporter), member 10	62.0987	6.9132	7.97386	2.99528	0.00139647	0.0629408
ENSMUSG00000001995	Sipa1l2	signal-induced proliferation-associated 1 like 2	1526.97	611.819	2.49334	1.31808	0.00140024	0.0629408
ENSMUSG00000078190	Dnm3os	dynamin 3, opposite strand	175.067	57.6368	3.00267	1.58625	0.00146252	0.0654671
ENSMUSG00000041220	Elovl6	ELOVL family member 6, elongation of long chain fatty acids (yeast)	990.158	394.524	2.50594	1.32535	0.00149001	0.066265
ENSMUSG00000050010	Shisa3	shisa family member 3	160.286	51.0499	3.09867	1.63165	0.00153686	0.0677633
ENSMUSG00000021760	Gpx8	glutathione peroxidase 8 (putative)	185.717	53.706	3.4131	1.77108	0.00154674	0.0679081
ENSMUSG00000060675	Pla2g16	phospholipase A2, group XVI	542.119	185.185	2.9171	1.54453	0.00155634	0.0681843
ENSMUSG00000028047	Thbs3	thrombospondin 3	102.962	29.0772	3.4565	1.78931	0.00156911	0.0684524
ENSMUSG00000021745	Ptprg	protein tyrosine phosphatase, receptor type, G	3345.11	1419.77	2.35513	1.23581	0.00157521	0.0685477
ENSMUSG00000027386	Fbln7	fibulin 7	355.263	108.186	3.2629	1.70615	0.00158293	0.0685477
ENSMUSG00000071042	Rasgrp3	RAS, guanyl releasing protein 3	992.448	332.343	2.98026	1.57544	0.00162965	0.0700545
ENSMUSG00000045392	Olfr1033	olfactory receptor 1033	31.6221	3.1092	7.93881	2.98892	0.00162529	0.0700545
ENSMUSG00000029322	Plac8	placenta-specific 8	292.572	84.2887	3.4421	1.78329	0.00163927	0.0703214
ENSMUSG00000001493	Meox1	mesenchyme homeobox 1	126.276	35.8873	3.45041	1.78677	0.00165777	0.070967
ENSMUSG00000001029	Icam2	intercellular adhesion molecule 2	1072.58	242.356	4.41156	2.14129	0.00166509	0.0709853
ENSMUSG00000006356	Crip2	cysteine rich protein 2	1651.29	492.395	3.34883	1.74366	0.00166487	0.0709853
ENSMUSG00000020866	Cacna1g	calcium channel, voltage-dependent, T type, alpha 1G subunit	95.3104	23.7999	3.88349	1.95735	0.00170043	0.0721928
ENSMUSG00000071984	Fndc1	fibronectin type III domain containing 1	89.4224	24.4789	3.54892	1.82738	0.00176751	0.0748865
ENSMUSG00000045838	A430105I19Rik	RIKEN cDNA A430105I19 gene	454.422	155.913	2.90239	1.53724	0.00178125	0.0752545
ENSMUSG00000029086	Prom1	prominin 1	3012.8	1248.87	2.41129	1.2698	0.00178351	0.0752545
ENSMUSG00000023008	Fmnl3	formin-like 3	1897.29	671.581	2.8224	1.49692	0.00179412	0.0755473
ENSMUSG00000042821	Snai1	snail family zinc finger 1	70.5673	7.37834	8.54194	3.09456	0.00181626	0.0761681
ENSMUSG00000020684	Rasl10b	RAS-like, family 10, member B	69.319	13.5703	4.82618	2.27088	0.00183301	0.0767146
ENSMUSG00000040732	Erg	ETS transcription factor	1035.75	210.258	4.9075	2.29499	0.00185677	0.0773156
ENSMUSG00000028439	Fam219a	family with sequence similarity 219, member A	354.491	124.245	2.83837	1.50506	0.00185864	0.0773156
ENSMUSG00000032690	Oas2	2'-5' oligoadenylate synthetase 2	464.377	154.02	3.00205	1.58595	0.00185643	0.0773156
ENSMUSG00000033502	Cdc14a	CDC14 cell division cycle 14A	1267.29	458.771	2.75853	1.4639	0.00187016	0.0774818
ENSMUSG00000037060	Cavin3	caveolae associated 3	750.584	120.125	6.20501	2.63343	0.00186755	0.0774818
ENSMUSG00000026235	Epha4	Eph receptor A4	471.648	185.065	2.54023	1.34496	0.00190885	0.0786104
ENSMUSG00000047841	Fndc11	fibronectin type III domain containing 11	22.111	0.790806	12.9054	3.6899	0.00190642	0.0786104
ENSMUSG00000038387	Rras	related RAS viral (r-ras) oncogene	614.636	150.353	4.06756	2.02416	0.00194782	0.0800552
ENSMUSG00000029710	Ephb4	Eph receptor B4	2269.54	990.496	2.29002	1.19536	0.00195568	0.0800572
ENSMUSG00000030092	Cntn6	contactin 6	19.4662	0.395403	14.6669	3.87449	0.00195754	0.0800572
ENSMUSG00000032172	Olfm2	olfactomedin 2	107.318	28.1111	3.72087	1.89564	0.00195954	0.0800572
ENSMUSG00000028476	Reck	reversion-inducing-cysteine-rich protein with kazal motifs	388.146	78.2256	4.91187	2.29627	0.0019714	0.0801867
ENSMUSG00000051855	Mest	mesoderm specific transcript	148.805	45.8679	3.19633	1.67642	0.00197439	0.0801867
ENSMUSG00000039115	Itga9	integrin alpha 9	1879.99	718.126	2.61566	1.38718	0.00196694	0.0801867
ENSMUSG00000041134	Cyyr1	cysteine and tyrosine-rich protein 1	1945.31	493.455	3.93628	1.97683	0.0019822	0.0801876
ENSMUSG00000002020	Ltbp2	latent transforming growth factor beta binding protein 2	225.049	60.1097	3.69907	1.88716	0.00200619	0.0806824
ENSMUSG00000009035	Tmem184b	transmembrane protein 184b	1360.65	558.131	2.43529	1.28409	0.00203154	0.0813064
ENSMUSG00000024529	Lox	lysyl oxidase	296.137	16.3105	17.1651	4.10141	0.00203773	0.0813064
ENSMUSG00000026676	Ccdc3	coiled-coil domain containing 3	246.201	32.8939	7.29337	2.86659	0.00204145	0.0813064
ENSMUSG00000026811	St6galnac6	ST6 (alpha-N-acetyl-neuraminyl-2,3-beta-galactosyl-1,3)-N-acetylgalactosaminide alpha-2,6-sialyltransferase 6	116.733	27.5924	4.11763	2.04181	0.00203085	0.0813064
ENSMUSG00000037936	Scarb1	scavenger receptor class B, member 1	585.73	236.637	2.46902	1.30394	0.00206781	0.0821973
ENSMUSG00000001036	Epn2	epsin 2	1156.82	468.972	2.46359	1.30076	0.00208244	0.0826195
ENSMUSG00000004098	Col5a3	collagen, type V, alpha 3	98.0326	26.391	3.61552	1.8542	0.00209678	0.0830285
ENSMUSG00000060147	Serpinb6a	serine (or cysteine) peptidase inhibitor, clade B, member 6a	893.476	353.571	2.5227	1.33497	0.00212138	0.0832025
ENSMUSG00000039903	Eva1c	eva-1 homolog C (C. elegans)	93.4571	24.4559	3.71062	1.89166	0.00211801	0.0832025
ENSMUSG00000037736	Limch1	LIM and calponin homology domains 1	3555.04	1508.45	2.35585	1.23625	0.00211772	0.0832025
ENSMUSG00000019124	Scrn1	secernin 1	197.088	71.4216	2.73521	1.45165	0.00210887	0.0832025
ENSMUSG00000000317	Bcl6b	B cell CLL/lymphoma 6, member B	602.924	107.709	5.55541	2.47389	0.00216131	0.0846075
ENSMUSG00000030123	Plxnd1	plexin D1	5304.53	2097.58	2.52815	1.33808	0.0021659	0.0846264
ENSMUSG00000004562	Arhgef40	Rho guanine nucleotide exchange factor (GEF) 40	661.6	259.96	2.53909	1.34431	0.00219085	0.0854389
ENSMUSG00000035245	Eogt	EGF domain-specific O-linked N-acetylglucosamine (GlcNAc) transferase	888.064	343.83	2.57827	1.3664	0.00224164	0.0872545
ENSMUSG00000021186	Fbln5	fibulin 5	1554.21	318.46	4.86823	2.2834	0.00228318	0.0881304
ENSMUSG00000043631	Ecm2	extracellular matrix protein 2, female organ and adipocyte specific	285.815	36.7967	7.58836	2.92379	0.00229838	0.0881304
ENSMUSG00000021943	Gdf10	growth differentiation factor 10	713.132	85.7494	8.23212	3.04126	0.00228685	0.0881304
ENSMUSG00000041378	Cldn5	claudin 5	674.663	104.685	6.39317	2.67653	0.00229591	0.0881304
ENSMUSG00000046387	Pcdhb17	protocadherin beta 17	74.7051	15.5458	4.57548	2.19392	0.0022883	0.0881304
ENSMUSG00000029661	Col1a2	collagen, type I, alpha 2	2108.99	370.935	5.67303	2.50412	0.00229721	0.0881304
ENSMUSG00000030930	Chst15	carbohydrate (N-acetylgalactosamine 4-sulfate 6-O) sulfotransferase 15	1206.46	488.012	2.46919	1.30404	0.00228603	0.0881304
ENSMUSG00000037169	Mycn	v-myc avian myelocytomatosis viral related oncogene, neuroblastoma derived	145.099	50.8957	2.81524	1.49326	0.00231547	0.0884562
ENSMUSG00000030116	Mfap5	microfibrillar associated protein 5	36.4292	3.60094	8.13512	3.02416	0.00232193	0.0885385
ENSMUSG00000027750	Postn	periostin, osteoblast specific factor	34.7946	3.95403	7.22535	2.85307	0.00232891	0.0886405
ENSMUSG00000025407	Gli1	GLI-Kruppel family member GLI1	63.1992	14.1564	4.23578	2.08263	0.00244546	0.0923936
ENSMUSG00000041120	Nbl1	neuroblastoma, suppression of tumorigenicity 1	265.538	66.2221	3.96504	1.98733	0.00244437	0.0923936
ENSMUSG00000059974	Ntm	neurotrimin	35.3995	0.790806	20.3258	4.34524	0.0024787	0.0931366
ENSMUSG00000023000	Dhh	desert hedgehog	102.775	20.022	4.93649	2.30349	0.00248455	0.0931866
ENSMUSG00000035540	Gc	vitamin D binding protein	496.482	133.546	3.69749	1.88654	0.00248925	0.0931929
ENSMUSG00000035969	Rusc2	RUN and SH3 domain containing 2	954.944	363.041	2.62592	1.39282	0.00250163	0.0934866
ENSMUSG00000038702	Dsel	dermatan sulfate epimerase-like	246.523	89.1218	2.74653	1.45761	0.00251242	0.0937197
ENSMUSG00000026582	Sele	selectin, endothelial cell	237.385	76.9964	3.05636	1.61181	0.00253404	0.0938227
ENSMUSG00000043122	A530016L24Rik	RIKEN cDNA A530016L24 gene	34.46	3.32797	8.19321	3.03443	0.00253433	0.0938227
ENSMUSG00000027204	Fbn1	fibrillin 1	1365.52	156.948	8.65167	3.11298	0.0025361	0.0938227
ENSMUSG00000018604	Tbx3	T-box 3	999.146	186.031	5.34749	2.41886	0.00252868	0.0938227
ENSMUSG00000005973	Rcn1	reticulocalbin 1	459.692	161.809	2.82964	1.50062	0.00258852	0.0953493
ENSMUSG00000031561	Tenm3	teneurin transmembrane protein 3	142.416	46.5898	3.01358	1.59148	0.00260501	0.0957853
ENSMUSG00000000901	Mmp11	matrix metallopeptidase 11	108.644	30.0881	3.52688	1.81839	0.00267589	0.0980022
ENSMUSG00000034872	Gipc3	GIPC PDZ domain containing family, member 3	57.0665	12.3144	4.3612	2.12472	0.0026821	0.0980022
ENSMUSG00000028978	Nos3	nitric oxide synthase 3, endothelial cell	905.445	174.017	5.17917	2.37272	0.00268434	0.0980022
ENSMUSG00000035778	Ggta1	glycoprotein galactosyltransferase alpha 1, 3	674.342	253.225	2.65647	1.40951	0.00268924	0.0980074
ENSMUSG00000064080	Fbln2	fibulin 2	1589.37	247.209	6.40738	2.67973	0.00270364	0.0981846
ENSMUSG00000045954	Cavin2	caveolae associated 2	2314.54	978.168	2.36481	1.24172	0.00275494	0.099446
ENSMUSG00000026478	Lamc1	laminin, gamma 1	2664.03	1150.38	2.31463	1.21078	0.00275769	0.099446
ENSMUSG00000054364	Rhob	ras homolog family member B	4084.79	1790.09	2.28117	1.18978	0.00274964	0.099446
ENSMUSG00000092212	Slc22a13b-ps	solute carrier family 22 (organic cation transporter), member 13b, pseudogene	38.4305	6.19147	5.48296	2.45496	0.00274535	0.099446
ENSMUSG00000030074	Gxylt2	glucoside xylosyltransferase 2	35.406	3.96925	7.32626	2.87308	0.00278892	0.100221
ENSMUSG00000030342	Cd9	CD9 antigen	955.922	374.848	2.54604	1.34825	0.00278578	0.100221
ENSMUSG00000022622	Acr	acrosin prepropeptide	29.9361	2.26486	9.47547	3.2442	0.0027956	0.100286
ENSMUSG00000028776	Tinagl1	tubulointerstitial nephritis antigen-like 1	2879.06	654.793	4.39172	2.13479	0.00281309	0.100738
ENSMUSG00000053137	Mapk11	mitogen-activated protein kinase 11	173.137	56.7314	3.01632	1.59279	0.00284141	0.101575
ENSMUSG00000042745	Id1	inhibitor of DNA binding 1	412.014	142.02	2.88781	1.52997	0.00285456	0.101869
ENSMUSG00000041731	Pgm5	phosphoglucomutase 5	187.635	44.485	4.14719	2.05213	0.00287118	0.102284
ENSMUSG00000009828	Ick	intestinal cell kinase	548.548	204.003	2.68068	1.4226	0.00288014	0.102427
ENSMUSG00000028681	Ptch2	patched 2	71.2238	13.8618	4.85969	2.28086	0.00290736	0.102814
ENSMUSG00000000693	Loxl3	lysyl oxidase-like 3	149.674	42.9562	3.42783	1.77729	0.00290897	0.102814
ENSMUSG00000062995	Ica1	islet cell autoantigen 1	318.023	125.298	2.52596	1.33683	0.00294646	0.103888
ENSMUSG00000040249	Lrp1	low density lipoprotein receptor-related protein 1	6075.26	2540.42	2.39089	1.25755	0.00295627	0.103968
ENSMUSG00000057123	Gja5	gap junction protein, alpha 5	871.789	172.519	5.02994	2.33054	0.00295882	0.103968
ENSMUSG00000030796	Tead2	TEA domain family member 2	197.185	50.2625	3.86607	1.95087	0.00299388	0.104842
ENSMUSG00000030772	Dkk3	dickkopf WNT signaling pathway inhibitor 3	360.611	135.76	2.64413	1.40279	0.00301559	0.105423
ENSMUSG00000041261	Car8	carbonic anhydrase 8	264.226	63.8661	4.08882	2.03169	0.00302103	0.105434
ENSMUSG00000045281	Gpr20	G protein-coupled receptor 20	55.9403	0.491408	38.1789	5.2547	0.00304839	0.106209
ENSMUSG00000022306	Zfpm2	zinc finger protein, multitype 2	165.401	25.3815	6.3075	2.65707	0.00305969	0.106363
ENSMUSG00000016128	Stard13	StAR-related lipid transfer (START) domain containing 13	636.934	256.923	2.47335	1.30647	0.00306315	0.106363
ENSMUSG00000029287	Tgfbr3	transforming growth factor, beta receptor III	1844.61	812.869	2.2677	1.18123	0.00307782	0.106693
ENSMUSG00000017491	Rarb	retinoic acid receptor, beta	291.916	113.99	2.54732	1.34898	0.00311991	0.107904
ENSMUSG00000026825	Dnm1	dynamin 1	113.239	37.3266	2.98066	1.57563	0.0031315	0.107904
ENSMUSG00000040624	Plekhg1	pleckstrin homology domain containing, family G (with RhoGef domain) member 1	1255.46	553.983	2.26397	1.17885	0.00316643	0.108366
ENSMUSG00000055538	Zcchc24	zinc finger, CCHC domain containing 24	380.971	132.397	2.86341	1.51773	0.00317346	0.108366
ENSMUSG00000033960	Jcad	junctional cadherin 5 associated	2271.77	646.527	3.50992	1.81144	0.00315424	0.108366
ENSMUSG00000024909	Efemp2	epidermal growth factor-containing fibulin-like extracellular matrix protein 2	224.45	62.6424	3.54245	1.82475	0.00316854	0.108366
ENSMUSG00000072720	Myo18b	myosin XVIIIb	25.2063	0	26.2063	4.71184	0.00317091	0.108366
ENSMUSG00000034413	Neurl1b	neuralized E3 ubiquitin protein ligase 1B	1013.34	446.704	2.26564	1.17992	0.00320261	0.10882
ENSMUSG00000070576	Mn1	meningioma 1	439.73	152.594	2.86945	1.52077	0.00320244	0.10882
ENSMUSG00000026586	Prrx1	paired related homeobox 1	74.8339	21.3424	3.39417	1.76306	0.00322163	0.109106
ENSMUSG00000026193	Fn1	fibronectin 1	3024.96	508.986	5.93341	2.56886	0.00325479	0.109868
ENSMUSG00000041729	Coro2b	coronin, actin binding protein, 2B	303.165	100.653	2.99218	1.5812	0.00326786	0.110128
ENSMUSG00000007655	Cav1	caveolin 1, caveolae protein	1050.78	230.159	4.55003	2.18588	0.0033399	0.112372
ENSMUSG00000041859	Mcm3	minichromosome maintenance complex component 3	516.463	195.123	2.63846	1.3997	0.00337725	0.113444
ENSMUSG00000034205	Loxl2	lysyl oxidase-like 2	251.239	99.7506	2.5036	1.32401	0.00338597	0.113551
ENSMUSG00000053963	Stum	mechanosensory transduction mediator	145.877	21.7537	6.45511	2.69044	0.0034339	0.114961
ENSMUSG00000047910	Pcdhb16	protocadherin beta 16	75.8249	18.5639	3.92688	1.97338	0.00343916	0.114961
ENSMUSG00000072623	Zfp9	zinc finger protein 9	92.6656	28.0828	3.22065	1.68735	0.00344601	0.115003
ENSMUSG00000053080	2700081O15Rik	RIKEN cDNA 2700081O15 gene	290.063	111.199	2.59416	1.37527	0.00345418	0.115089
ENSMUSG00000026883	Dab2ip	disabled 2 interacting protein	2280.71	1005.74	2.26643	1.18042	0.00347987	0.115571
ENSMUSG00000001119	Col6a1	collagen, type VI, alpha 1	652.161	137.738	4.70787	2.23507	0.0034913	0.115578
ENSMUSG00000027932	Slc27a3	solute carrier family 27 (fatty acid transporter), member 3	101.334	32.4709	3.05739	1.6123	0.00349084	0.115578
ENSMUSG00000005836	Gata6	GATA binding protein 6	61.2171	10.9092	5.22429	2.38523	0.0035024	0.115759
ENSMUSG00000025909	Sntg1	syntrophin, gamma 1	44.3122	8.09974	4.97951	2.316	0.00351299	0.115923
ENSMUSG00000022912	Pros1	protein S (alpha)	1221.75	333.359	3.657	1.87066	0.0035608	0.116448
ENSMUSG00000022895	Ets2	E26 avian leukemia oncogene 2, 3' domain	3554.69	1406.55	2.52616	1.33695	0.00356141	0.116448
ENSMUSG00000024451	Arap3	ArfGAP with RhoGAP domain, ankyrin repeat and PH domain 3	2147.25	840.677	2.55234	1.35182	0.00356284	0.116448
ENSMUSG00000069378	Prdm6	PR domain containing 6	57.3689	0	58.3689	5.86713	0.00355094	0.116448
ENSMUSG00000045319	Proser2	proline and serine rich 2	122.885	44.1314	2.74498	1.4568	0.00354198	0.116448
ENSMUSG00000037014	Sstr4	somatostatin receptor 4	98.2256	30.7009	3.13005	1.64619	0.00353834	0.116448
ENSMUSG00000048078	Tenm4	teneurin transmembrane protein 4	264.541	108.982	2.4144	1.27167	0.00364449	0.118477
ENSMUSG00000026797	Stxbp1	syntaxin binding protein 1	415.656	130.344	3.17224	1.6655	0.0036894	0.119635
ENSMUSG00000054720	Lrrc8c	leucine rich repeat containing 8 family, member C	1272.31	531.849	2.38963	1.25679	0.0037176	0.120171
ENSMUSG00000029581	Fscn1	fascin actin-bundling protein 1	273.319	104.819	2.59234	1.37425	0.00373105	0.120417
ENSMUSG00000029335	Bmp3	bone morphogenetic protein 3	118.908	43.3796	2.70187	1.43396	0.00375515	0.121005
ENSMUSG00000051515	Fam181b	family with sequence similarity 181, member B	45.9466	5.91917	6.78501	2.76235	0.00378348	0.121728
ENSMUSG00000049807	Arhgap23	Rho GTPase activating protein 23	914.332	206.268	4.41618	2.1428	0.00382667	0.122543
ENSMUSG00000026657	Frmd4a	FERM domain containing 4A	1804.26	765.235	2.35601	1.23634	0.00381508	0.122543
ENSMUSG00000034361	Cpne2	copine II	489.531	123.98	3.92486	1.97264	0.00382452	0.122543
ENSMUSG00000044927	H1fx	H1 histone family, member X	44.9299	9.05513	4.56781	2.1915	0.00384593	0.122968
ENSMUSG00000020846	Rflnb	refilin B	613.054	252.391	2.42335	1.277	0.00389551	0.124168
ENSMUSG00000051379	Flrt3	fibronectin leucine rich transmembrane protein 3	120.079	38.2177	3.08736	1.62637	0.00396064	0.125854
ENSMUSG00000042106	Fam212a	family with sequence similarity 212, member A	104.075	29.4623	3.44934	1.78632	0.00398966	0.126581
ENSMUSG00000017765	Slc12a4	solute carrier family 12, member 4	672.578	223.181	3.00461	1.58718	0.00404239	0.128057
ENSMUSG00000027188	Pamr1	peptidase domain containing associated with muscle regeneration 1	340.295	148.986	2.27552	1.18619	0.0040545	0.128243
ENSMUSG00000039126	Prune2	prune homolog 2	293.344	107.976	2.701	1.43349	0.0041412	0.130466
ENSMUSG00000075592	Nynrin	NYN domain and retroviral integrase containing	337.669	83.1157	4.02623	2.00943	0.00418614	0.131091
ENSMUSG00000027314	Dll4	delta-like 4 (Drosophila)	999.468	310.318	3.21366	1.68422	0.00418911	0.131091
ENSMUSG00000070645	Ren1	renin 1 structural	3408.93	73.2073	45.9514	5.52204	0.00420943	0.131129
ENSMUSG00000039710	Slc7a12	solute carrier family 7 (cationic amino acid transporter, y+ system), member 12	302.026	24.1801	12.0343	3.58908	0.00420422	0.131129
ENSMUSG00000028364	Tnc	tenascin C	359.639	66.463	5.34572	2.41839	0.00420192	0.131129
ENSMUSG00000023336	Wfdc1	WAP four-disulfide core domain 1	175.627	13.9222	11.8365	3.56517	0.00428375	0.133243
ENSMUSG00000021701	Plk2	polo-like kinase 2	2064.2	915.858	2.25248	1.17151	0.00430827	0.133415
ENSMUSG00000037185	Krt80	keratin 80	681.086	286.292	2.37419	1.24744	0.00430874	0.133415
ENSMUSG00000044043	Pcdhb14	protocadherin beta 14	90.1301	15.4241	5.54857	2.47212	0.00430056	0.133415
ENSMUSG00000060519	Tor3a	torsin family 3, member A	663.724	284.381	2.32925	1.21987	0.00433019	0.133878
ENSMUSG00000036960	Clca2	chloride channel accessory 2	18.3658	0	19.3658	4.27544	0.00436761	0.134631
ENSMUSG00000033209	Ttc28	tetratricopeptide repeat domain 28	1846.3	611.947	3.01381	1.59159	0.00437774	0.134741
ENSMUSG00000033032	Afap1l1	actin filament associated protein 1-like 1	966.824	406.836	2.37307	1.24676	0.00442017	0.135844
ENSMUSG00000047497	Adamts12	a disintegrin-like and metallopeptidase (reprolysin type) with thrombospondin type 1 motif, 12	70.5094	13.9374	4.78726	2.2592	0.00449258	0.137659
ENSMUSG00000036885	Arhgef26	Rho guanine nucleotide exchange factor (GEF) 26	290.391	120.678	2.39477	1.25988	0.00448736	0.137659
ENSMUSG00000068699	Flnc	filamin C, gamma	75.4837	3.25923	17.9572	4.16649	0.00450674	0.137887
ENSMUSG00000008734	Gprc5b	G protein-coupled receptor, family C, group 5, member B	416.364	117.036	3.5359	1.82208	0.0045392	0.138656
ENSMUSG00000025477	Inpp5a	inositol polyphosphate-5-phosphatase A	1448.79	573.212	2.52484	1.33619	0.00454533	0.138656
ENSMUSG00000066705	Fxyd6	FXYD domain-containing ion transport regulator 6	69.6987	17.6081	3.79935	1.92575	0.0046656	0.141904
ENSMUSG00000035373	Ccl7	chemokine (C-C motif) ligand 7	91.8419	24.1306	3.69438	1.88533	0.00468764	0.142155
ENSMUSG00000047766	Lrrc49	leucine rich repeat containing 49	179.385	62.8667	2.8244	1.49795	0.00470991	0.14262
ENSMUSG00000047819	Tigd4	tigger transposable element derived 4	35.5153	0	36.5153	5.19043	0.00486894	0.14636
ENSMUSG00000003585	Sec14l2	SEC14-like lipid binding 2	59.7951	16.6783	3.43896	1.78197	0.00491652	0.147145
ENSMUSG00000041827	Oasl1	2'-5' oligoadenylate synthetase-like 1	313.319	59.6665	5.18109	2.37326	0.00491188	0.147145
ENSMUSG00000071347	C1qtnf9	C1q and tumor necrosis factor related protein 9	83.3475	14.8249	5.33004	2.41415	0.00493858	0.147591
ENSMUSG00000017754	Pltp	phospholipid transfer protein	716.595	305.569	2.34073	1.22696	0.0049931	0.148591
ENSMUSG00000048376	F2r	coagulation factor II (thrombin) receptor	1592.25	688.996	2.30906	1.20731	0.00501068	0.148882
ENSMUSG00000027792	Bche	butyrylcholinesterase	35.9465	0	36.9465	5.20736	0.00503167	0.14929
ENSMUSG00000044317	Gpr4	G protein-coupled receptor 4	164.192	43.1308	3.74323	1.90428	0.00504532	0.149479
ENSMUSG00000021062	Rab15	RAB15, member RAS oncogene family	102.318	33.481	2.99639	1.58322	0.00509841	0.150619
ENSMUSG00000040280	Ndufa4l2	NADH dehydrogenase (ubiquinone) 1 alpha subcomplex, 4-like 2	84.3835	6.21873	11.828	3.56414	0.00513791	0.150914
ENSMUSG00000038188	Scarf1	scavenger receptor class F, member 1	322.946	127.308	2.52474	1.33614	0.00513681	0.150914
ENSMUSG00000029426	Scarb2	scavenger receptor class B, member 2	1928.82	835.82	2.30614	1.20548	0.00512816	0.150914
ENSMUSG00000048126	Col6a3	collagen, type VI, alpha 3	1621.96	171.164	9.42685	3.23678	0.00517115	0.151464
ENSMUSG00000044229	Nxpe4	neurexophilin and PC-esterase domain family, member 4	270.686	49.2207	5.40984	2.43559	0.00524931	0.152667
ENSMUSG00000034127	Tspan8	tetraspanin 8	957.949	315.006	3.03459	1.6015	0.00530352	0.153598
ENSMUSG00000020814	Mxra7	matrix-remodelling associated 7	331.028	134.68	2.44715	1.2911	0.00529308	0.153598
ENSMUSG00000090958	Lrrc32	leucine rich repeat containing 32	2505.21	522.89	4.78384	2.25817	0.00530369	0.153598
ENSMUSG00000022048	Dpysl2	dihydropyrimidinase-like 2	1700.39	733.888	2.31517	1.21112	0.00534616	0.154335
ENSMUSG00000082420	Gm6517	predicted gene 6517	309.374	121.994	2.52348	1.33542	0.00538165	0.154588
ENSMUSG00000052911	Lamb2	laminin, beta 2	6864.34	1005.65	6.82	2.76977	0.00538873	0.154588
ENSMUSG00000043673	Kcns3	potassium voltage-gated channel, delayed-rectifier, subfamily S, member 3	91.2498	22.0098	4.00916	2.0033	0.0054343	0.155629
ENSMUSG00000057530	Ece1	endothelin converting enzyme 1	4898.98	2199.35	2.22691	1.15504	0.00552087	0.157889
ENSMUSG00000022440	C1qtnf6	C1q and tumor necrosis factor related protein 6	43.8939	6.67183	5.85179	2.54888	0.00554494	0.158358
ENSMUSG00000044365	Cxxc4	CXXC finger 4	45.8566	7.31293	5.63659	2.49482	0.00560819	0.159721
ENSMUSG00000044338	Aplnr	apelin receptor	110.748	36.8783	2.95019	1.56081	0.00563459	0.160251
ENSMUSG00000020241	Col6a2	collagen, type VI, alpha 2	1008.81	187.461	5.35822	2.42175	0.00568498	0.161461
ENSMUSG00000042499	Hoxd11	homeobox D11	18.7583	0.763876	11.2016	3.48564	0.00571638	0.162129
ENSMUSG00000018986	Slfn3	schlafen 3	287.932	43.609	6.47699	2.69532	0.0057661	0.163218
ENSMUSG00000026890	Lhx6	LIM homeobox protein 6	37.3301	6.16487	5.34973	2.41947	0.00577062	0.163218
ENSMUSG00000042846	Lrrtm3	leucine rich repeat transmembrane neuronal 3	111.552	14.2365	7.38702	2.88499	0.00579745	0.163752
ENSMUSG00000090291	Lrrc10b	leucine rich repeat containing 10B	48.2954	1.03634	24.2078	4.5974	0.00583723	0.16465
ENSMUSG00000047907	Tshz2	teashirt zinc finger family member 2	82.1828	26.1177	3.06748	1.61705	0.00588563	0.165788
ENSMUSG00000035829	Ppp1r26	protein phosphatase 1, regulatory subunit 26	277.604	117.999	2.34123	1.22727	0.00591674	0.166074
ENSMUSG00000050989	Selenon	selenoprotein N	516.051	203.934	2.52301	1.33514	0.00593189	0.166074
ENSMUSG00000029093	Sorcs2	sortilin-related VPS10 domain containing receptor 2	71.9703	19.9954	3.47553	1.79723	0.00593612	0.166074
ENSMUSG00000024913	Lrp5	low density lipoprotein receptor-related protein 5	1892.21	873.845	2.16406	1.11374	0.00596394	0.166416
ENSMUSG00000064272	Gpbar1	G protein-coupled bile acid receptor 1	46.6738	9.88825	4.37847	2.13043	0.00602554	0.167348
ENSMUSG00000000555	Itga5	integrin alpha 5 (fibronectin receptor alpha)	1020.87	443.42	2.29934	1.20122	0.0060285	0.167348
ENSMUSG00000017697	Ada	adenosine deaminase	227.063	84.6969	2.66127	1.41212	0.00603676	0.167348
ENSMUSG00000060548	Tnfrsf19	tumor necrosis factor receptor superfamily, member 19	95.3425	11.6584	7.61097	2.92808	0.00606872	0.167733
ENSMUSG00000035187	Nkx6-1	NK6 homeobox 1	145.581	0	146.581	7.19556	0.00607685	0.167733
ENSMUSG00000057596	Trim30d	tripartite motif-containing 30D	290.996	97.196	2.9736	1.57221	0.00606178	0.167733
ENSMUSG00000049521	Cdc42ep1	CDC42 effector protein (Rho GTPase binding) 1	860.303	325.014	2.64192	1.40159	0.00614054	0.169037
ENSMUSG00000022505	Emp2	epithelial membrane protein 2	621.464	123.316	5.0071	2.32397	0.00616508	0.169486
ENSMUSG00000045498	Pcdhb3	protocadherin beta 3	15.9784	0.395403	12.1674	3.60495	0.00619429	0.169836
ENSMUSG00000017740	Slc12a5	solute carrier family 12, member 5	177.667	61.3702	2.86462	1.51834	0.00621662	0.170054
ENSMUSG00000029851	Tcaf2	TRPM8 channel-associated factor 2	145.581	59.5284	2.4217	1.27602	0.00621878	0.170054
ENSMUSG00000047821	Trim16	tripartite motif-containing 16	305.854	117.602	2.58726	1.37142	0.00623065	0.170113
ENSMUSG00000031520	Vegfc	vascular endothelial growth factor C	229.444	55.5539	4.07476	2.02672	0.00623745	0.170113
ENSMUSG00000004655	Aqp1	aquaporin 1	10135.7	4750.96	2.13316	1.09299	0.00626515	0.170643
ENSMUSG00000021367	Edn1	endothelin 1	577.267	143.401	4.0046	2.00166	0.00628232	0.170715
ENSMUSG00000003032	Klf4	Kruppel-like factor 4 (gut)	5398.29	1753.21	3.07789	1.62194	0.00628464	0.170715
ENSMUSG00000042190	Cmklr1	chemokine-like receptor 1	600.711	247.005	2.42621	1.2787	0.00630773	0.170715
ENSMUSG00000032860	P2ry2	purinergic receptor P2Y, G-protein coupled 2	236.323	96.1714	2.44231	1.28825	0.00630928	0.170715
ENSMUSG00000038517	Tbkbp1	TBK1 binding protein 1	416.249	174.095	2.38299	1.25277	0.00633941	0.171306
ENSMUSG00000031841	Cdh13	cadherin 13	315.056	45.003	6.87034	2.78038	0.0063534	0.171459
ENSMUSG00000068246	Apol9b	apolipoprotein L 9b	265.628	11.2508	21.7642	4.44389	0.00638283	0.172027
ENSMUSG00000090260	2810442N19Rik	RIKEN cDNA 2810442N19 gene	33.9902	4.48759	6.37625	2.67271	0.00639725	0.17206
ENSMUSG00000036718	Micall2	MICAL-like 2	100.092	31.9028	3.07243	1.61938	0.00640347	0.17206
ENSMUSG00000090698	Apold1	apolipoprotein L domain containing 1	1678.88	401.451	4.17412	2.06147	0.0064091	0.17206
ENSMUSG00000044574	5031434C07Rik	RIKEN cDNA 5031434C07 gene	207.931	84.4496	2.44508	1.28988	0.00644093	0.172464
ENSMUSG00000074796	Slc4a11	solute carrier family 4, sodium bicarbonate transporter-like, member 11	224.489	93.3289	2.39045	1.25728	0.00649042	0.173339
ENSMUSG00000023885	Thbs2	thrombospondin 2	1998.27	240.538	8.27724	3.04915	0.00651526	0.173567
ENSMUSG00000070436	Serpinh1	serine (or cysteine) peptidase inhibitor, clade H, member 1	2873.51	1181.74	2.43039	1.28119	0.00651583	0.173567
ENSMUSG00000047330	Kcne4	potassium voltage-gated channel, Isk-related subfamily, gene 4	68.9972	7.18617	8.55066	3.09604	0.00654028	0.173631
ENSMUSG00000090186	Gm7592	predicted gene 7592	63.5531	13.5591	4.43387	2.14857	0.00654351	0.173631
ENSMUSG00000064215	Ifi27	interferon, alpha-inducible protein 27	684.084	285.719	2.38939	1.25664	0.00656397	0.173918
ENSMUSG00000013846	St3gal1	ST3 beta-galactoside alpha-2,3-sialyltransferase 1	1145.94	465.417	2.45904	1.2981	0.00657122	0.173918
ENSMUSG00000032207	Lipc	lipase, hepatic	12.9217	0	13.9217	3.79927	0.00660001	0.174232
ENSMUSG00000020811	Wscd1	WSC domain containing 1	335.218	142.145	2.34878	1.23191	0.00671216	0.174508
ENSMUSG00000005360	Slc1a3	solute carrier family 1 (glial high affinity glutamate transporter), member 3	112.872	39.9066	2.78371	1.47701	0.00670642	0.174508
ENSMUSG00000048489	8430408G22Rik	RIKEN cDNA 8430408G22 gene	353.931	148.96	2.36684	1.24296	0.00664574	0.174508
ENSMUSG00000023191	P3h3	prolyl 3-hydroxylase 3	251.69	101.084	2.47532	1.30761	0.00670515	0.174508
ENSMUSG00000037613	Tnfrsf23	tumor necrosis factor receptor superfamily, member 23	66.1465	16.5181	3.83298	1.93847	0.00662618	0.174508
ENSMUSG00000014786	Slc9a5	solute carrier family 9 (sodium/hydrogen exchanger), member 5	55.7538	13.1627	4.00727	2.00262	0.00667302	0.174508
ENSMUSG00000034487	Kdelc2	KDEL (Lys-Asp-Glu-Leu) containing 2	470.278	199.766	2.34739	1.23106	0.00666036	0.174508
ENSMUSG00000032548	Slco2a1	solute carrier organic anion transporter family, member 2a1	2668.26	431.108	6.17731	2.62698	0.0066564	0.174508
ENSMUSG00000042439	Zfp532	zinc finger protein 532	708.183	158.68	4.44127	2.15097	0.00673696	0.174932
ENSMUSG00000056073	Grik2	glutamate receptor, ionotropic, kainate 2 (beta 2)	14.524	0	15.524	3.95643	0.0067685	0.175088
ENSMUSG00000059049	Frem1	Fras1 related extracellular matrix protein 1	63.6368	16.9938	3.59217	1.84486	0.00676753	0.175088
ENSMUSG00000034614	Pik3ip1	phosphoinositide-3-kinase interacting protein 1	359.163	150.18	2.38234	1.25238	0.00681372	0.175773
ENSMUSG00000020844	Nxn	nucleoredoxin	345.597	138.043	2.49273	1.31773	0.00682058	0.175773
ENSMUSG00000044017	Adgrd1	adhesion G protein-coupled receptor D1	45.3611	8.45683	4.90239	2.29348	0.00684015	0.176057
ENSMUSG00000000531	Grasp	GRP1 (general receptor for phosphoinositides 1)-associated scaffold protein	690.204	272.573	2.52658	1.33719	0.00688295	0.176717
ENSMUSG00000025128	Bhlhe22	basic helix-loop-helix family, member e22	40.2517	6.05765	5.84496	2.54719	0.00687853	0.176717
ENSMUSG00000050666	Vstm4	V-set and transmembrane domain containing 4	52.1823	13.3925	3.69513	1.88563	0.00692691	0.177002
ENSMUSG00000022144	Gdnf	glial cell line derived neurotrophic factor	28.0699	4.0497	5.75676	2.52526	0.00692497	0.177002
ENSMUSG00000023963	Cyp39a1	cytochrome P450, family 39, subfamily a, polypeptide 1	115.69	45.5334	2.50767	1.32635	0.00692843	0.177002
ENSMUSG00000027669	Gnb4	guanine nucleotide binding protein (G protein), beta 4	453.096	147.94	3.04886	1.60827	0.00696535	0.177504
ENSMUSG00000032060	Cryab	crystallin, alpha B	1137.37	501.585	2.26504	1.17953	0.00695848	0.177504
ENSMUSG00000022433	Csnk1e	casein kinase 1, epsilon	705.513	309.513	2.27531	1.18606	0.00697567	0.177548
ENSMUSG00000006611	Hfe	hemochromatosis	558.658	241.314	2.30964	1.20767	0.00703272	0.178779
ENSMUSG00000013236	Ptprs	protein tyrosine phosphatase, receptor type, S	1297.16	517.538	2.50351	1.32395	0.00706124	0.179282
ENSMUSG00000022091	Sorbs3	sorbin and SH3 domain containing 3	988.214	447.012	2.20801	1.14274	0.00710599	0.179529
ENSMUSG00000024140	Epas1	endothelial PAS domain protein 1	20777.5	5030.96	4.12931	2.0459	0.00711454	0.179529
ENSMUSG00000051243	Islr2	immunoglobulin superfamily containing leucine-rich repeat 2	146.051	51.9309	2.77817	1.47414	0.00716014	0.180458
ENSMUSG00000038086	Hspb2	heat shock protein 2	37.7548	6.01534	5.52429	2.46579	0.0071746	0.180602
ENSMUSG00000055799	Tcf7l1	transcription factor 7 like 1 (T cell specific, HMG box)	345.881	129.271	2.66276	1.41292	0.0071936	0.180644
ENSMUSG00000078816	Prkcg	protein kinase C, gamma	59.943	9.20916	5.96944	2.5776	0.00722964	0.181322
ENSMUSG00000052861	Dnah6	dynein, axonemal, heavy chain 6	19.2346	1.43175	8.321	3.05676	0.00724118	0.181391
ENSMUSG00000032855	Pkd1	polycystic kidney disease 1 homolog	2688	1210.16	2.22018	1.15068	0.00725287	0.181413
ENSMUSG00000001870	Ltbp1	latent transforming growth factor beta binding protein 1	2817.63	241.982	11.6001	3.53607	0.00726015	0.181413
ENSMUSG00000031486	Adgra2	adhesion G protein-coupled receptor A2	865.02	201.542	4.27574	2.09617	0.00726851	0.181413
ENSMUSG00000055485	Soga1	suppressor of glucose, autophagy associated 1	1630.62	742.235	2.1953	1.13442	0.00735277	0.183072
ENSMUSG00000032532	Cck	cholecystokinin	12.7029	0	13.7029	3.77641	0.0073809	0.18333
ENSMUSG00000034471	Caskin2	CASK-interacting protein 2	1844.02	899.402	2.04911	1.035	0.00746713	0.185025
ENSMUSG00000021904	Sema3g	sema domain, immunoglobulin domain (Ig), short basic domain, secreted, (semaphorin) 3G	3138.61	649.007	4.83011	2.27206	0.00751377	0.185957
ENSMUSG00000053477	Tcf4	transcription factor 4	1961.81	879.828	2.22837	1.15599	0.00754881	0.1866
ENSMUSG00000071604	Fam189a2	family with sequence similarity 189, member A2	226.123	89.8575	2.49977	1.3218	0.00767199	0.189037
ENSMUSG00000028849	Map7d1	MAP7 domain containing 1	3885.45	1573.63	2.46817	1.30344	0.00767493	0.189037
ENSMUSG00000031749	St3gal2	ST3 beta-galactoside alpha-2,3-sialyltransferase 2	796.879	369.484	2.15361	1.10676	0.00773106	0.190192
ENSMUSG00000086567	Gm2830	predicted gene 2830	62.9997	9.00127	6.39915	2.67788	0.00779739	0.191431
ENSMUSG00000030650	Tmc5	transmembrane channel-like gene family 5	26.1523	3.62737	5.86776	2.55281	0.00780004	0.191431
ENSMUSG00000031883	Car7	carbonic anhydrase 7	186.399	45.5904	4.02227	2.00801	0.00781117	0.191476
ENSMUSG00000021281	Tnfaip2	tumor necrosis factor, alpha-induced protein 2	1950.2	899.826	2.16601	1.11504	0.00784622	0.192106
ENSMUSG00000056367	Actr3b	ARP3 actin-related protein 3B	19.5241	0.886812	10.8777	3.4433	0.00786318	0.192293
ENSMUSG00000037035	Inhbb	inhibin beta-B	363.668	124.063	2.91587	1.54393	0.00796143	0.193775
ENSMUSG00000026580	Selp	selectin, platelet	52.1051	13.5576	3.64793	1.86708	0.00795679	0.193775
ENSMUSG00000037892	Pcdh18	protocadherin 18	192.036	24.3067	7.62787	2.93128	0.00796037	0.193775
ENSMUSG00000051790	Nlgn2	neuroligin 2	253.453	99.2862	2.53727	1.34328	0.0079786	0.193964
ENSMUSG00000027230	Creb3l1	cAMP responsive element binding protein 3-like 1	196.258	67.1873	2.89289	1.53251	0.00801363	0.194586
ENSMUSG00000001943	Vsig2	V-set and immunoglobulin domain containing 2	89.9049	30.9046	2.84927	1.51059	0.00813636	0.197184
ENSMUSG00000036111	Lmo1	LIM domain only 1	55.8631	3.57384	12.4322	3.63601	0.00820046	0.19842
ENSMUSG00000074639	Rdh16f2	RDH16 family member 2	1255.55	258.537	4.8415	2.27545	0.00822169	0.1987
ENSMUSG00000020620	Abca8b	ATP-binding cassette, sub-family A (ABC1), member 8b	71.108	16.9985	4.00634	2.00229	0.00825851	0.199143
ENSMUSG00000030255	Sspn	sarcospan	223.967	25.8652	8.37392	3.0659	0.00829573	0.199786
ENSMUSG00000043496	Tril	TLR4 interactor with leucine-rich repeats	593.767	80.3136	7.31448	2.87076	0.00832536	0.200062
ENSMUSG00000027848	Olfml3	olfactomedin-like 3	183.922	68.0112	2.67959	1.42201	0.00835301	0.200462
ENSMUSG00000030000	Add2	adducin 2 (beta)	211.992	29.2039	7.05179	2.81799	0.00839215	0.201167
ENSMUSG00000017734	Dbndd2	dysbindin (dystrobrevin binding protein 1) domain containing 2	81.9768	20.8018	3.80596	1.92826	0.00847154	0.202599
ENSMUSG00000028108	Ecm1	extracellular matrix protein 1	868.559	114.044	7.55851	2.9181	0.00848753	0.202746
ENSMUSG00000040998	Npnt	nephronectin	3070.14	1527	2.00991	1.00713	0.00851051	0.202824
ENSMUSG00000047414	Flrt2	fibronectin leucine rich transmembrane protein 2	126.083	45.707	2.72086	1.44406	0.00865702	0.205602
ENSMUSG00000001349	Cnn1	calponin 1	542.138	3.92694	110.238	6.78448	0.00868177	0.205715
ENSMUSG00000036867	Smad6	SMAD family member 6	644.392	243.621	2.63833	1.39963	0.00869291	0.205742
ENSMUSG00000031963	Bmper	BMP-binding endothelial regulator	56.8863	15.642	3.47833	1.79839	0.00870545	0.205802
ENSMUSG00000042066	Tmcc2	transmembrane and coiled-coil domains 2	470.104	133.296	3.50794	1.81062	0.00874015	0.206386
ENSMUSG00000043079	Synpo	synaptopodin	2103.83	477.916	4.39498	2.13586	0.00876536	0.206744
ENSMUSG00000038781	Stap2	signal transducing adaptor family member 2	244.463	112.732	2.15827	1.10987	0.00879175	0.207085
ENSMUSG00000085784	Gm12158	predicted gene 12158	74.8016	13.9154	5.08212	2.34543	0.00889814	0.207393
ENSMUSG00000032849	Abcc4	ATP-binding cassette, sub-family C (CFTR/MRP), member 4	2025.47	963.3	2.1015	1.07142	0.00887134	0.207393
ENSMUSG00000086109	Gm13391	predicted gene 13391	17.2525	0.491408	12.2385	3.61335	0.00887701	0.207393
ENSMUSG00000063605	Ccdc102a	coiled-coil domain containing 102A	241.374	93.1276	2.57495	1.36455	0.00891374	0.207393
ENSMUSG00000044646	Zbtb7c	zinc finger and BTB domain containing 7C	263.781	51.3333	5.05952	2.339	0.00896804	0.208186
ENSMUSG00000033147	Slc22a15	solute carrier family 22 (organic anion/cation transporter), member 15	156.129	56.5706	2.72932	1.44854	0.00896417	0.208186
ENSMUSG00000015094	Npdc1	neural proliferation, differentiation and control 1	490.117	212.588	2.29937	1.20124	0.00902259	0.209216
ENSMUSG00000017446	C1qtnf1	C1q and tumor necrosis factor related protein 1	181.142	35.7378	4.95789	2.30973	0.00904882	0.209353
ENSMUSG00000025083	Afap1l2	actin filament associated protein 1-like 2	1400.4	373.317	3.74389	1.90454	0.0090439	0.209353
ENSMUSG00000038457	Tmem255b	transmembrane protein 255B	24.2089	3.35474	5.78884	2.53327	0.00906081	0.209395
ENSMUSG00000038068	Rnf144b	ring finger protein 144B	194.218	71.9152	2.67733	1.42079	0.00907676	0.209529
ENSMUSG00000044921	Rassf9	Ras association (RalGDS/AF-6) domain family (N-terminal) member 9	257.308	113.794	2.25018	1.17004	0.00910466	0.209937
ENSMUSG00000070643	Sox13	SRY (sex determining region Y)-box 13	1579.39	700.234	2.25372	1.17231	0.00912558	0.210184
ENSMUSG00000056220	Pla2g4a	phospholipase A2, group IVA (cytosolic, calcium-dependent)	616.097	231.509	2.65408	1.40821	0.00917432	0.210236
ENSMUSG00000036667	Tcaf1	TRPM8 channel-associated factor 1	903.309	324.394	2.77912	1.47463	0.00914098	0.210236
ENSMUSG00000034845	Plvap	plasmalemma vesicle associated protein	6897.24	1878.47	3.6703	1.8759	0.00916578	0.210236
ENSMUSG00000026519	Tmem63a	transmembrane protein 63a	387.355	157.046	2.45723	1.29703	0.00923347	0.211251
ENSMUSG00000026181	Ppm1f	protein phosphatase 1F (PP2C domain containing)	997.886	463.24	2.15166	1.10545	0.00933393	0.213076
ENSMUSG00000034109	Golim4	golgi integral membrane protein 4	2386.04	867.271	2.74919	1.45901	0.00932407	0.213076
ENSMUSG00000063160	Numbl	numb-like	122.936	41.3856	2.92402	1.54795	0.00941925	0.214204
ENSMUSG00000035713	Usp35	ubiquitin specific peptidase 35	168.182	61.4658	2.70839	1.43743	0.00942492	0.214204
ENSMUSG00000030117	Gdf3	growth differentiation factor 3	38.3147	3.0826	9.62982	3.26751	0.00944067	0.214325
ENSMUSG00000027082	Tfpi	tissue factor pathway inhibitor	237.719	107.389	2.20243	1.1391	0.00949816	0.215393
ENSMUSG00000041559	Fmod	fibromodulin	459.59	164.018	2.79115	1.48086	0.00954098	0.215888
ENSMUSG00000032332	Col12a1	collagen, type XII, alpha 1	2181.67	292.101	7.44683	2.89663	0.00953406	0.215888
ENSMUSG00000027859	Ngf	nerve growth factor	127.228	7.80001	14.5714	3.86507	0.0095958	0.216653
ENSMUSG00000070462	Tlnrd1	talin rod domain containing 1	750.52	351.354	2.13286	1.09279	0.00959036	0.216653
ENSMUSG00000023961	Enpp4	ectonucleotide pyrophosphatase/phosphodiesterase 4	720.944	327.791	2.19575	1.13472	0.00961879	0.216821
ENSMUSG00000038463	Olfml2b	olfactomedin-like 2B	240.859	25.9258	8.98244	3.16711	0.00964802	0.21688
ENSMUSG00000090210	Itga10	integrin, alpha 10	48.791	10.5988	4.29278	2.10191	0.0096764	0.217281
ENSMUSG00000023809	Rps6ka2	ribosomal protein S6 kinase, polypeptide 2	212.436	92.8795	2.27351	1.18492	0.00974959	0.218211
ENSMUSG00000044576	Garem2	GRB2 associated regulator of MAPK1 subtype 2	23.1342	2.01916	7.99369	2.99886	0.0097414	0.218211
ENSMUSG00000046768	Rhoj	ras homolog family member J	978.489	99.8342	9.71386	3.28005	0.00981047	0.219335
ENSMUSG00000038204	Asb10	ankyrin repeat and SOCS box-containing 10	33.9709	5.10176	5.73128	2.51886	0.00982343	0.219386
ENSMUSG00000022220	Adcy4	adenylate cyclase 4	761.601	191.029	3.97128	1.98961	0.00995466	0.221357
ENSMUSG00000019577	Pdk4	pyruvate dehydrogenase kinase, isoenzyme 4	3042.64	1566.16	1.94214	0.957647	0.00994535	0.221357
ENSMUSG00000038058	Nod1	nucleotide-binding oligomerization domain containing 1	689.567	296.04	2.32482	1.21712	0.00993764	0.221357
ENSMUSG00000084843	B230312C02Rik	RIKEN cDNA B230312C02 gene	11.9564	0	12.9564	3.69559	0.00998195	0.221724
ENSMUSG00000053626	Tll1	tolloid-like	218.054	59.5111	3.62006	1.85601	0.0100053	0.222002
ENSMUSG00000018417	Myo1b	myosin IB	621.232	163.971	3.77177	1.91524	0.0101833	0.224983
ENSMUSG00000038305	Spats2l	spermatogenesis associated, serine-rich 2-like	370.733	153.544	2.40535	1.26624	0.0102548	0.226078
ENSMUSG00000037225	Fgf2	fibroblast growth factor 2	18.2307	1.28205	8.42693	3.07501	0.0103301	0.227008
ENSMUSG00000037032	Apbb1	amyloid beta (A4) precursor protein-binding, family B, member 1	403.423	161.341	2.4912	1.31684	0.0103249	0.227008
ENSMUSG00000059146	Ntrk3	neurotrophic tyrosine kinase, receptor, type 3	383.371	5.67346	57.5969	5.84792	0.0103635	0.227499
ENSMUSG00000020053	Igf1	insulin-like growth factor 1	443.933	182.079	2.43028	1.28112	0.0103983	0.227535
ENSMUSG00000019966	Kitl	kit ligand	1513.38	533.758	2.8319	1.50177	0.0103924	0.227535
ENSMUSG00000035547	Capn5	calpain 5	578.567	187.527	3.07418	1.6202	0.0103922	0.227535
ENSMUSG00000001288	Rarg	retinoic acid receptor, gamma	848.134	379.533	2.23143	1.15797	0.0104498	0.228178
ENSMUSG00000046718	Bst2	bone marrow stromal cell antigen 2	468.231	92.8528	4.99965	2.32183	0.0104423	0.228178
ENSMUSG00000024620	Pdgfrb	platelet derived growth factor receptor, beta polypeptide	1539.37	192.469	7.96185	2.9931	0.0104988	0.229006
ENSMUSG00000033565	Rbfox2	RNA binding protein, fox-1 homolog (C. elegans) 2	1448.19	414.607	3.48692	1.80195	0.0105351	0.229311
ENSMUSG00000002565	Scin	scinderin	2710.09	1119.1	2.42039	1.27524	0.0105843	0.229775
ENSMUSG00000086964	Gm15948	predicted gene 15948	47.6519	9.57363	4.60125	2.20203	0.0105899	0.229775
ENSMUSG00000039865	Slc44a3	solute carrier family 44, member 3	172.204	76.1811	2.24412	1.16615	0.0107301	0.23184
ENSMUSG00000007872	Id3	inhibitor of DNA binding 3	1073.07	310.744	3.44535	1.78465	0.0107188	0.23184
ENSMUSG00000029126	Nsg1	neuron specific gene family member 1	67.6202	21.7114	3.0214	1.59522	0.0107085	0.23184
ENSMUSG00000079455	Gm16026	predicted pseudogene 16026	59.5183	15.0325	3.77473	1.91637	0.0107476	0.231975
ENSMUSG00000050295	Foxc1	forkhead box C1	925.4	245.725	3.75479	1.90873	0.0107921	0.232204
ENSMUSG00000043458	Pcdhb12	protocadherin beta 12	34.0288	6.42212	4.71952	2.23864	0.0108586	0.232953
ENSMUSG00000039607	Rbms3	RNA binding motif, single stranded interacting protein	567.113	147.605	3.82296	1.93469	0.0108682	0.232953
ENSMUSG00000086602	Gm15609	predicted gene 15609	127.962	28.19	4.41802	2.1434	0.0109951	0.234856
ENSMUSG00000086040	Wipf3	WAS/WASL interacting protein family, member 3	147.628	61.8785	2.36373	1.24107	0.0111702	0.238348
ENSMUSG00000032925	Itgbl1	integrin, beta-like 1	111.701	37.9404	2.89418	1.53316	0.0112045	0.238584
ENSMUSG00000040296	Ddx58	DEAD (Asp-Glu-Ala-Asp) box polypeptide 58	1340.66	555.371	2.41145	1.2699	0.0112016	0.238584
ENSMUSG00000047945	Marcksl1	MARCKS-like 1	1033.05	494.516	2.08682	1.06131	0.0112562	0.23919
ENSMUSG00000020019	Ntn4	netrin 4	2908.29	1248.87	2.32767	1.21889	0.0112842	0.239539
ENSMUSG00000075538	Gm10855	predicted gene 10855	16.5061	0.491408	11.7379	3.55311	0.0112992	0.239589
ENSMUSG00000044667	Plppr4	phospholipid phosphatase related 4	123.065	50.8693	2.39188	1.25814	0.0113156	0.239589
ENSMUSG00000038507	Parp12	poly (ADP-ribose) polymerase family, member 12	1364.46	465.227	2.92875	1.55028	0.011329	0.239589
ENSMUSG00000074364	Ehd2	EH-domain containing 2	2223.19	372.968	5.94754	2.57229	0.011341	0.239589
ENSMUSG00000032006	Pdgfd	platelet-derived growth factor, D polypeptide	960.71	313.643	3.05651	1.61189	0.0113754	0.23999
ENSMUSG00000001507	Itga3	integrin alpha 3	1770.92	775.119	2.28305	1.19096	0.0115234	0.242865
ENSMUSG00000019066	Rab3d	RAB3D, member RAS oncogene family	400.998	188.517	2.12117	1.08486	0.0115397	0.242959
ENSMUSG00000040724	Kcna2	potassium voltage-gated channel, shaker-related subfamily, member 2	49.3572	9.1242	4.97395	2.31439	0.0115577	0.243089
ENSMUSG00000026042	Col5a2	collagen, type V, alpha 2	1154.21	308.153	3.73668	1.90176	0.0115835	0.243384
ENSMUSG00000061232	H2-K1	histocompatibility 2, K1, K region	11864.9	3995.14	2.96933	1.57014	0.0116267	0.243794
ENSMUSG00000027570	Col9a3	collagen, type IX, alpha 3	36.989	6.75228	4.90036	2.29289	0.0116834	0.244486
ENSMUSG00000027716	Trpc3	transient receptor potential cation channel, subfamily C, member 3	126.212	14.7823	8.06041	3.01085	0.0117334	0.245282
ENSMUSG00000025185	Loxl4	lysyl oxidase-like 4	87.2987	25.5931	3.32036	1.73134	0.0118152	0.245902
ENSMUSG00000026796	Fam129b	family with sequence similarity 129, member B	1183.91	459.113	2.57525	1.36471	0.0117863	0.245902
ENSMUSG00000043468	Adam30	a disintegrin and metallopeptidase domain 30	32.8126	3.99584	6.76814	2.75876	0.0118167	0.245902
ENSMUSG00000063171	Rps4l	ribosomal protein S4-like	139.623	56.574	2.44247	1.28834	0.0118285	0.245902
ENSMUSG00000045868	Gvin1	GTPase, very large interferon inducible 1	403.333	30.235	12.9448	3.69431	0.0118258	0.245902
ENSMUSG00000032649	Colgalt2	collagen beta(1-O)galactosyltransferase 2	412.684	203.048	2.02738	1.01962	0.0118523	0.246018
ENSMUSG00000043943	Naalad2	N-acetylated alpha-linked acidic dipeptidase 2	112.055	42.3482	2.60805	1.38297	0.0118785	0.246314
ENSMUSG00000024065	Ehd3	EH-domain containing 3	3246.09	1145.64	2.83184	1.50174	0.0119182	0.246888
ENSMUSG00000002266	Zim1	zinc finger, imprinted 1	19.1574	1.58161	7.80805	2.96496	0.0120134	0.247865
ENSMUSG00000002997	Prkar2b	protein kinase, cAMP dependent regulatory, type II beta	119.905	28.4258	4.10881	2.03872	0.0120437	0.24824
ENSMUSG00000046841	Ckap4	cytoskeleton-associated protein 4	486.224	213.012	2.27662	1.18689	0.0121379	0.249433
ENSMUSG00000075602	Ly6a	lymphocyte antigen 6 complex, locus A	3272.04	1413.85	2.31334	1.20998	0.0121228	0.249433
ENSMUSG00000051048	P4ha3	procollagen-proline, 2-oxoglutarate 4-dioxygenase (proline 4-hydroxylase), alpha polypeptide III	11.4094	0	12.4094	3.63337	0.0121308	0.249433
ENSMUSG00000063564	Col23a1	collagen, type XXIII, alpha 1	118.689	23.2163	4.94249	2.30524	0.0122845	0.250942
ENSMUSG00000001506	Col1a1	collagen, type I, alpha 1	2224.96	467.68	4.74943	2.24775	0.0122669	0.250942
ENSMUSG00000087203	Gm13986	predicted gene 13986	11.3708	0	12.3708	3.62887	0.0122488	0.250942
ENSMUSG00000040483	Xaf1	XIAP associated factor 1	525.046	82.6308	6.29011	2.65308	0.0123284	0.251092
ENSMUSG00000043822	Adamtsl5	ADAMTS-like 5	212.596	31.1502	6.64371	2.73199	0.0123824	0.251943
ENSMUSG00000032549	Rab6b	RAB6B, member RAS oncogene family	1043.18	206.382	5.03506	2.33201	0.0124069	0.252192
ENSMUSG00000028524	Sgip1	SH3-domain GRB2-like (endophilin) interacting protein 1	104.809	13.5852	7.25452	2.85888	0.0124436	0.252689
ENSMUSG00000037679	Inf2	inverted formin, FH2 and WH2 domain containing	976.083	237.593	4.09519	2.03393	0.0124695	0.252715
ENSMUSG00000048776	Pthlh	parathyroid hormone-like peptide	32.42	2.04609	10.9715	3.45568	0.0125061	0.253208
ENSMUSG00000061751	Kalrn	kalirin, RhoGEF kinase	2662.69	1108.01	2.40186	1.26415	0.0125348	0.25354
ENSMUSG00000061462	Obscn	obscurin, cytoskeletal calmodulin and titin-interacting RhoGEF	77.8971	27.945	2.72576	1.44666	0.0125699	0.253751
ENSMUSG00000039994	Timeless	timeless circadian clock 1	655.679	196.539	3.3243	1.73305	0.012705	0.255227
ENSMUSG00000029314	Gpat3	glycerol-3-phosphate acyltransferase 3	232.842	93.6012	2.47187	1.3056	0.0127327	0.255261
ENSMUSG00000042985	Upk3b	uroplakin 3B	57.62	18.1256	3.065	1.61589	0.012724	0.255261
ENSMUSG00000025492	Ifitm3	interferon induced transmembrane protein 3	1883.98	372.852	5.04204	2.33401	0.0127439	0.255261
ENSMUSG00000020758	Itgb4	integrin beta 4	478.019	142.458	3.33908	1.73945	0.0128198	0.256283
ENSMUSG00000021250	Fos	FBJ osteosarcoma oncogene	21850.6	9789.17	2.232	1.15833	0.012814	0.256283
ENSMUSG00000070880	Gad1	glutamate decarboxylase 1	54.042	10.3797	4.83688	2.27408	0.0128477	0.256593
ENSMUSG00000024538	Ppic	peptidylprolyl isomerase C	621.214	301.676	2.05571	1.03964	0.0129154	0.257446
ENSMUSG00000039005	Tlr4	toll-like receptor 4	485.033	177.156	2.72813	1.44791	0.0129056	0.257446
ENSMUSG00000037239	Spred3	sprouty-related, EVH1 domain containing 3	80.3166	30.0864	2.61583	1.38727	0.0129654	0.258192
ENSMUSG00000030317	Timp4	tissue inhibitor of metalloproteinase 4	32.6775	6.76367	4.33783	2.11697	0.0130055	0.258741
ENSMUSG00000044393	Dsg2	desmoglein 2	514.809	265.299	1.93696	0.95379	0.0130512	0.259399
ENSMUSG00000022947	Cbr3	carbonyl reductase 3	47.8773	11.5931	3.88126	1.95653	0.0131318	0.260499
ENSMUSG00000005220	Corin	corin	651.161	66.5602	9.65304	3.27098	0.0131832	0.261014
ENSMUSG00000026604	Ptpn14	protein tyrosine phosphatase, non-receptor type 14	1653.58	610.853	2.70422	1.43521	0.0132145	0.26119
ENSMUSG00000029406	Pitpnm2	phosphatidylinositol transfer protein, membrane-associated 2	1208.84	573.333	2.10651	1.07486	0.0132174	0.26119
ENSMUSG00000019978	Epb41l2	erythrocyte membrane protein band 4.1 like 2	2367.79	1129.28	2.09574	1.06746	0.0132786	0.262147
ENSMUSG00000056445	Hoxaas2	Hoxa cluster antisense RNA 2	15.7403	0.790806	9.34789	3.22464	0.0133494	0.263292
ENSMUSG00000030020	Prickle2	prickle planar cell polarity protein 2	1068.45	159.689	6.65543	2.73453	0.0134326	0.264427
ENSMUSG00000062329	Cytl1	cytokine-like 1	42.5425	13.7722	2.9476	1.55954	0.0134599	0.2646
ENSMUSG00000020354	Sgcd	sarcoglycan, delta (dystrophin-associated glycoprotein)	43.1281	8.19974	4.79667	2.26203	0.0135021	0.264871
ENSMUSG00000036856	Wnt4	wingless-type MMTV integration site family, member 4	63.0254	18.6866	3.25223	1.70143	0.0135066	0.264871
ENSMUSG00000051236	Msrb3	methionine sulfoxide reductase B3	1920.41	202.121	9.45944	3.24176	0.013538	0.264899
ENSMUSG00000043885	Slc36a4	solute carrier family 36 (proton/amino acid symporter), member 4	416.776	204.961	2.02843	1.02036	0.0135305	0.264899
ENSMUSG00000046275	Tusc5	tumor suppressor candidate 5	119.661	5.52376	18.4956	4.20911	0.0135703	0.26507
ENSMUSG00000050556	Kcnb1	potassium voltage gated channel, Shab-related subfamily, member 1	701.162	103.855	6.6965	2.74341	0.0136859	0.266756
ENSMUSG00000037419	Endod1	endonuclease domain containing 1	1268.53	325.06	3.89354	1.96108	0.0137332	0.267027
ENSMUSG00000059791	Nrm	nurim (nuclear envelope membrane protein)	180.016	71.0968	2.51073	1.32811	0.0139838	0.270238
ENSMUSG00000024679	Ms4a6d	membrane-spanning 4-domains, subfamily A, member 6D	210.814	81.2062	2.57662	1.36548	0.013994	0.270238
ENSMUSG00000004891	Nes	nestin	2727.55	548.687	4.96383	2.31145	0.0139995	0.270238
ENSMUSG00000001168	Oas1h	2'-5' oligoadenylate synthetase 1H	44.3571	3.42414	10.2522	3.35786	0.0140712	0.271291
ENSMUSG00000041801	Phlda3	pleckstrin homology like domain, family A, member 3	104.294	38.8557	2.64188	1.40156	0.0140889	0.27138
ENSMUSG00000029669	Tspan12	tetraspanin 12	619.476	271.425	2.2776	1.18751	0.0141812	0.272233
ENSMUSG00000034520	Gjc1	gap junction protein, gamma 1	430.637	51.1192	8.28173	3.04993	0.0142389	0.272738
ENSMUSG00000032714	Syde1	synapse defective 1, Rho GTPase, homolog 1 (C. elegans)	618.279	280.86	2.19711	1.13561	0.0143609	0.274081
ENSMUSG00000030787	Lyve1	lymphatic vessel endothelial hyaluronan receptor 1	38.7522	6.28764	5.45474	2.44751	0.0144043	0.274628
ENSMUSG00000074899	Sptbn5	spectrin beta, non-erythrocytic 5	138.098	54.6164	2.50102	1.32251	0.0144226	0.274659
ENSMUSG00000035212	Leprot	leptin receptor overlapping transcript	438.945	206.751	2.11765	1.08247	0.0144326	0.274659
ENSMUSG00000042659	Arrdc4	arrestin domain containing 4	743.712	344.656	2.15449	1.10735	0.014511	0.275897
ENSMUSG00000029671	Wnt16	wingless-type MMTV integration site family, member 16	26.6027	5.08605	4.53541	2.18123	0.0145488	0.276361
ENSMUSG00000068245	Phf11d	PHD finger protein 11D	533.174	132.259	4.00853	2.00307	0.0145957	0.27673
ENSMUSG00000050908	Tvp23a	trans-golgi network vesicle protein 23A	48.3405	11.785	3.85926	1.94832	0.0146147	0.27673
ENSMUSG00000072214	Sept5	septin 5	172.782	16.4756	9.94428	3.31387	0.014599	0.27673
ENSMUSG00000020099	Unc5b	unc-5 netrin receptor B	669.322	218.301	3.05663	1.61194	0.0147205	0.277827
ENSMUSG00000037735	2810032G03Rik	RIKEN cDNA 2810032G03 gene	19.936	1.97702	7.03253	2.81404	0.0147868	0.278568
ENSMUSG00000040836	Gpr161	G protein-coupled receptor 161	70.2713	12.8056	5.16249	2.36807	0.0149283	0.280562
ENSMUSG00000026840	Lamc3	laminin gamma 3	445.341	68.7755	6.39682	2.67735	0.0149335	0.280562
ENSMUSG00000055148	Klf2	Kruppel-like factor 2 (lung)	5981.85	2091.76	2.85883	1.51543	0.0149787	0.280899
ENSMUSG00000044052	Ccr10	chemokine (C-C motif) receptor 10	49.8335	14.5521	3.26859	1.70867	0.0150271	0.281039
ENSMUSG00000024912	Fosl1	fos-like antigen 1	25.4444	4.63678	4.6914	2.23002	0.0150272	0.281039
ENSMUSG00000009628	Tex15	testis expressed gene 15	39.9298	10.337	3.61028	1.85211	0.0150729	0.281639
ENSMUSG00000063296	Tmem117	transmembrane protein 117	167.133	79.0981	2.09908	1.06976	0.015242	0.28454
ENSMUSG00000039943	Plcb4	phospholipase C, beta 4	1155.61	427.683	2.69805	1.43192	0.0152764	0.284924
ENSMUSG00000026923	Notch1	notch 1	3872.59	1657.3	2.33589	1.22397	0.0154089	0.285282
ENSMUSG00000014599	Csf1	colony stimulating factor 1 (macrophage)	1280.89	325.147	3.93041	1.97468	0.0153557	0.285282
ENSMUSG00000027977	Ndst3	N-deacetylase/N-sulfotransferase (heparan glucosaminyl) 3	236.96	3.00198	59.4605	5.89386	0.01543	0.285282
ENSMUSG00000031538	Plat	plasminogen activator, tissue	5972.77	2532.32	2.35808	1.23761	0.0153399	0.285282
ENSMUSG00000031616	Ednra	endothelin receptor type A	496.899	16.7743	28.0122	4.80798	0.0153888	0.285282
ENSMUSG00000038604	Ripor1	RHO family interacting cell polarization regulator 1	1878.52	976.896	1.92201	0.942615	0.0154012	0.285282
ENSMUSG00000012519	Mlkl	mixed lineage kinase domain-like	284.438	50.8352	5.50665	2.46117	0.0153679	0.285282
ENSMUSG00000040322	Slc25a24	solute carrier family 25 (mitochondrial carrier, phosphate carrier), member 24	367.503	151.294	2.41968	1.27481	0.0155608	0.286765
ENSMUSG00000039653	Baat	bile acid-Coenzyme A: amino acid N-acyltransferase	37.6969	6.30352	5.29838	2.40555	0.0155597	0.286765
ENSMUSG00000041571	Selenow	selenoprotein W	621.677	292.439	2.122	1.08542	0.0156093	0.286765
ENSMUSG00000031996	Aplp2	amyloid beta (A4) precursor-like protein 2	12174.7	6472.67	1.8808	0.911345	0.0155982	0.286765
ENSMUSG00000021573	Tppp	tubulin polymerization promoting protein	195.698	81.3558	2.38839	1.25604	0.0156678	0.287287
ENSMUSG00000041773	Enc1	ectodermal-neural cortex 1	492.524	224.838	2.1853	1.12783	0.0157002	0.287287
ENSMUSG00000028862	Map3k6	mitogen-activated protein kinase kinase kinase 6	472.691	205.8	2.29058	1.19571	0.0157101	0.287287
ENSMUSG00000047619	Ddi1	DNA-damage inducible 1	36.8925	5.66258	5.68736	2.50776	0.0157066	0.287287
ENSMUSG00000053198	Prx	periaxin	104.461	35.4994	2.88939	1.53076	0.0157386	0.287331
ENSMUSG00000044548	Dact1	dishevelled-binding antagonist of beta-catenin 1	77.9678	24.1845	3.13558	1.64873	0.0157871	0.287674
ENSMUSG00000025498	Irf7	interferon regulatory factor 7	1641.07	251.757	6.49664	2.69969	0.0157828	0.287674
ENSMUSG00000020121	Srgap1	SLIT-ROBO Rho GTPase activating protein 1	219.855	98.3544	2.22291	1.15245	0.0159115	0.289174
ENSMUSG00000038811	Gngt2	guanine nucleotide binding protein (G protein), gamma transducing activity polypeptide 2	277.688	116.806	2.36564	1.24223	0.0159426	0.289457
ENSMUSG00000039911	Spsb1	splA/ryanodine receptor domain and SOCS box containing 1	205.576	86.6521	2.35677	1.23681	0.0159552	0.289457
ENSMUSG00000019467	Arhgef25	Rho guanine nucleotide exchange factor (GEF) 25	425.071	56.6689	7.38823	2.88523	0.0160091	0.289668
ENSMUSG00000004791	Pgf	placental growth factor	88.592	2.37242	26.5661	4.73151	0.0159952	0.289668
ENSMUSG00000042284	Itga1	integrin alpha 1	3429.82	1704.26	2.0119	1.00856	0.0159964	0.289668
ENSMUSG00000020135	Apc2	adenomatosis polyposis coli 2	137.042	54.2988	2.49629	1.31979	0.016132	0.291381
ENSMUSG00000015090	Ptgds	prostaglandin D2 synthase (brain)	128.142	58.07	2.18626	1.12846	0.0162837	0.292071
ENSMUSG00000027799	Nbea	neurobeachin	2084.84	1083.18	1.92388	0.94402	0.0162565	0.292071
ENSMUSG00000001098	Kctd10	potassium channel tetramerisation domain containing 10	907.903	312.318	2.9009	1.5365	0.0162365	0.292071
ENSMUSG00000029767	Calu	calumenin	2519.07	1312.94	1.91795	0.939567	0.0162301	0.292071
ENSMUSG00000043613	Mmp3	matrix metallopeptidase 3	152.474	24.6325	5.98746	2.58194	0.0162678	0.292071
ENSMUSG00000026471	Mr1	major histocompatibility complex, class I-related	211.116	66.0507	3.16353	1.66153	0.0164035	0.293053
ENSMUSG00000025213	Kazald1	Kazal-type serine peptidase inhibitor domain 1	33.6363	6.79043	4.446	2.15251	0.0164523	0.293053
ENSMUSG00000048916	Gm5540	predicted pseudogene 5540	352.676	150.369	2.33652	1.22436	0.0164307	0.293053
ENSMUSG00000052629	Gm9885	predicted gene 9885	10.663	0	11.663	3.54386	0.0164504	0.293053
ENSMUSG00000038295	Atg9b	autophagy related 9B	86.8932	11.3362	7.12481	2.83285	0.0164738	0.293182
ENSMUSG00000036110	Slc17a2	solute carrier family 17 (sodium phosphate), member 2	41.8862	0.491408	28.7555	4.84577	0.0164955	0.293237
ENSMUSG00000037411	Serpine1	serine (or cysteine) peptidase inhibitor, clade E, member 1	1181.39	207.325	5.67572	2.5048	0.0165053	0.293237
ENSMUSG00000003500	Impdh1	inosine monophosphate dehydrogenase 1	520.729	241.811	2.1487	1.10347	0.0165272	0.293372
ENSMUSG00000037579	Kcnh3	potassium voltage-gated channel, subfamily H (eag-related), member 3	23.0119	2.8098	6.30267	2.65596	0.0165671	0.293751
ENSMUSG00000057751	Megf6	multiple EGF-like-domains 6	31.4033	6.58704	4.27088	2.09453	0.0165771	0.293751
ENSMUSG00000047793	Sned1	sushi, nidogen and EGF-like domains 1	579.881	309.158	1.87286	0.90524	0.0166972	0.295372
ENSMUSG00000028456	Unc13b	unc-13 homolog B (C. elegans)	997.016	357.036	2.78747	1.47896	0.0167258	0.295622
ENSMUSG00000027408	Cpxm1	carboxypeptidase X 1 (M14 family)	79.6796	26.7751	2.90474	1.53841	0.0167798	0.296069
ENSMUSG00000054404	Slfn5	schlafen 5	4472.01	1014.64	4.40413	2.13886	0.0168824	0.296945
ENSMUSG00000045201	Lrrc3b	leucine rich repeat containing 3B	60.7732	16.4647	3.53702	1.82254	0.0168801	0.296945
ENSMUSG00000046223	Plaur	plasminogen activator, urokinase receptor	477.356	176.474	2.69536	1.43048	0.0168517	0.296945
ENSMUSG00000078915	Hsp25-ps1	heat shock protein 25, pseudogene 1	54.4924	11.2508	4.52972	2.17942	0.0169019	0.296951
ENSMUSG00000090628	Gm17083	predicted gene 17083	143.149	57.2738	2.47365	1.30664	0.016981	0.297823
ENSMUSG00000058656	Samd12	sterile alpha motif domain containing 12	302.862	52.2522	5.70609	2.5125	0.016972	0.297823
ENSMUSG00000027864	Ptgfrn	prostaglandin F2 receptor negative regulator	294.767	144.283	2.03579	1.02559	0.0169949	0.297823
ENSMUSG00000043501	Lgals2	lectin, galactose-binding, soluble 2	44.7369	12.2757	3.44515	1.78457	0.0170385	0.298081
ENSMUSG00000027797	Dclk1	doublecortin-like kinase 1	127.228	6.64523	16.7723	4.06801	0.0170812	0.298572
ENSMUSG00000024552	Slc14a2	solute carrier family 14 (urea transporter), member 2	1952.12	756.642	2.5779	1.3662	0.0171852	0.299881
ENSMUSG00000067336	Bmpr2	bone morphogenetic protein receptor, type II (serine/threonine kinase)	2890.44	1511.08	1.91224	0.93526	0.0172592	0.300238
ENSMUSG00000010311	Optc	opticin	106.971	0.395403	77.3759	6.27381	0.0172931	0.300238
ENSMUSG00000035314	Gdpd5	glycerophosphodiester phosphodiesterase domain containing 5	245.57	110.784	2.20577	1.14128	0.0172426	0.300238
ENSMUSG00000042717	Ppp1r3a	protein phosphatase 1, regulatory (inhibitor) subunit 3A	54.5632	0	55.5632	5.79606	0.0173613	0.301169
ENSMUSG00000021750	Fam107a	family with sequence similarity 107, member A	2931.55	1624.78	1.80378	0.851026	0.0174151	0.301387
ENSMUSG00000071855	Ccdc112	coiled-coil domain containing 112	236.374	109.141	2.15519	1.10781	0.0174471	0.301387
ENSMUSG00000028373	Astn2	astrotactin 2	82.3242	10.6095	7.17726	2.84343	0.0174256	0.301387
ENSMUSG00000034842	Art3	ADP-ribosyltransferase 3	134.056	31.4767	4.15856	2.05608	0.0173966	0.301387
ENSMUSG00000050212	Eva1b	eva-1 homolog B (C. elegans)	294.876	149.26	1.96909	0.977532	0.0174659	0.301459
ENSMUSG00000063727	Tnfrsf11b	tumor necrosis factor receptor superfamily, member 11b (osteoprotegerin)	113.509	11.2243	9.36729	3.22763	0.0175685	0.302722
ENSMUSG00000039977	Deup1	deuterosome assembly protein 1	24.093	3.35507	5.7618	2.52652	0.0176543	0.303945
ENSMUSG00000029503	P2rx2	purinergic receptor P2X, ligand-gated ion channel, 2	12.9796	0.245704	11.2223	3.48829	0.0177182	0.304792
ENSMUSG00000020653	Klf11	Kruppel-like factor 11	700.732	372.137	1.88063	0.911215	0.0177525	0.304826
ENSMUSG00000048965	Mrgpre	MAS-related GPR, member E	80.3231	23.4936	3.32017	1.73126	0.0177794	0.304826
ENSMUSG00000041323	Ak7	adenylate kinase 7	113.927	48.9433	2.30115	1.20236	0.0178405	0.305364
ENSMUSG00000029544	Cabp1	calcium binding protein 1	60.5672	7.40477	7.32526	2.87288	0.0178968	0.306075
ENSMUSG00000091562	Crybg3	beta-gamma crystallin domain containing 3	1771.78	923.153	1.91827	0.939808	0.018029	0.307314
ENSMUSG00000068574	Olfr458	olfactory receptor 458	15.8175	0.518172	11.0774	3.46955	0.0180124	0.307314
ENSMUSG00000034485	Uaca	uveal autoantigen with coiled-coil domains and ankyrin repeats	2954.05	1439.87	2.05088	1.03624	0.0180216	0.307314
ENSMUSG00000054146	Krt15	keratin 15	26.0686	1.55452	10.5964	3.4055	0.0181237	0.307342
ENSMUSG00000022594	Lynx1	Ly6/neurotoxin 1	618.646	264.604	2.33297	1.22217	0.0180521	0.307342
ENSMUSG00000026880	Stom	stomatin	1065.69	225.284	4.71392	2.23693	0.018132	0.307342
ENSMUSG00000053553	3110082I17Rik	RIKEN cDNA 3110082I17 gene	136.16	55.8531	2.41254	1.27055	0.0181455	0.307342
ENSMUSG00000054385	Ceacam2	carcinoembryonic antigen-related cell adhesion molecule 2	418.354	37.1635	10.9883	3.4579	0.0180696	0.307342
ENSMUSG00000046167	Gldn	gliomedin	66.6354	0	67.6354	6.07971	0.0181409	0.307342
ENSMUSG00000090399	Gm38399	predicted gene, 38399	403.044	198.362	2.02668	1.01912	0.0182858	0.30849
ENSMUSG00000022995	Enah	enabled homolog (Drosophila)	1526.75	631.045	2.41716	1.27331	0.018303	0.30849
ENSMUSG00000061143	Maml3	mastermind like 3 (Drosophila)	719.941	354.761	2.02648	1.01897	0.0182959	0.30849
ENSMUSG00000025856	Pdgfa	platelet derived growth factor, alpha	552.486	179.806	3.06121	1.6141	0.0185547	0.311632
ENSMUSG00000048218	Amigo2	adhesion molecule with Ig like domain 2	494.859	101.545	4.83554	2.27368	0.018576	0.311734
ENSMUSG00000024308	Tapbp	TAP binding protein	3162.94	1245.48	2.53831	1.34387	0.0186342	0.312456
ENSMUSG00000087317	4930466I24Rik	RIKEN cDNA 4930466I24 gene	32.0533	6.08425	4.66575	2.22211	0.0186643	0.312707
ENSMUSG00000074457	S100a16	S100 calcium binding protein A16	493.637	246.034	2.00231	1.00166	0.0187253	0.312964
ENSMUSG00000006930	Hap1	huntingtin-associated protein 1	269.663	69.3139	3.84935	1.94462	0.0188134	0.313928
ENSMUSG00000035735	Dagla	diacylglycerol lipase, alpha	124.725	57.44	2.15136	1.10525	0.0188126	0.313928
ENSMUSG00000019194	Scn1b	sodium channel, voltage-gated, type I, beta	252.552	122.787	2.04829	1.03442	0.0188475	0.314223
ENSMUSG00000025324	Atp10a	ATPase, class V, type 10A	520.716	91.6026	5.63392	2.49414	0.0188616	0.314223
ENSMUSG00000032666	1700025G04Rik	RIKEN cDNA 1700025G04 gene	587.654	239.979	2.44276	1.28851	0.0190381	0.316394
ENSMUSG00000074916	Chst14	carbohydrate (N-acetylgalactosamine 4-0) sulfotransferase 14	88.8368	31.2661	2.78425	1.47729	0.019135	0.317325
ENSMUSG00000025810	Nrp1	neuropilin 1	8021.54	3060.57	2.6204	1.38979	0.0191403	0.317325
ENSMUSG00000041889	Shisa4	shisa family member 4	173.741	59.1587	2.90467	1.53838	0.0192143	0.317784
ENSMUSG00000086311	Gm12122	predicted gene 12122	25.7339	0	26.7339	4.7406	0.0193794	0.319978
ENSMUSG00000026725	Tnn	tenascin N	48.4756	13.4892	3.41466	1.77174	0.0194535	0.320198
ENSMUSG00000041540	Sox5	SRY (sex determining region Y)-box 5	356.904	76.2039	4.63582	2.21283	0.019436	0.320198
ENSMUSG00000046618	Olfml2a	olfactomedin-like 2A	602.158	28.8713	20.1919	4.33571	0.019497	0.320493
ENSMUSG00000020260	Pofut2	protein O-fucosyltransferase 2	639.315	313.032	2.03901	1.02787	0.0196759	0.322691
ENSMUSG00000002980	Bcam	basal cell adhesion molecule	3792.1	1080.89	3.506	1.80983	0.0196833	0.322691
ENSMUSG00000006445	Epha2	Eph receptor A2	551.135	196.463	2.79614	1.48344	0.0197518	0.323042
ENSMUSG00000031778	Cx3cl1	chemokine (C-X3-C motif) ligand 1	1755.78	778.752	2.253	1.17185	0.0197508	0.323042
ENSMUSG00000021061	Sptb	spectrin beta, erythrocytic	383.957	188.606	2.0303	1.02169	0.0199327	0.325225
ENSMUSG00000027077	Smtnl1	smoothelin-like 1	10.1353	0	11.1353	3.47707	0.0199291	0.325225
ENSMUSG00000037003	Tns2	tensin 2	4120	2188.22	1.88241	0.912581	0.0202987	0.329521
ENSMUSG00000039239	Tgfb2	transforming growth factor, beta 2	569.301	94.5238	5.97025	2.57779	0.0203858	0.329595
ENSMUSG00000001508	Sgca	sarcoglycan, alpha (dystrophin-associated glycoprotein)	80.3164	0.395403	58.2745	5.86479	0.0204086	0.329595
ENSMUSG00000006522	Itih3	inter-alpha trypsin inhibitor, heavy chain 3	24.3247	1.67762	9.45791	3.24152	0.0203949	0.329595
ENSMUSG00000019487	Trip10	thyroid hormone receptor interactor 10	782.644	411.958	1.89763	0.924202	0.0203491	0.329595
ENSMUSG00000035686	Thrsp	thyroid hormone responsive	142.705	39.281	3.56757	1.83494	0.0203771	0.329595
ENSMUSG00000054728	Phactr1	phosphatase and actin regulator 1	814.994	399.603	2.03691	1.02638	0.020578	0.33181
ENSMUSG00000057098	Ebf1	early B cell factor 1	1352.19	209.82	6.41874	2.68229	0.0206465	0.332271
ENSMUSG00000056515	Rab31	RAB31, member RAS oncogene family	422.594	214.429	1.96628	0.975471	0.020655	0.332271
ENSMUSG00000070822	Zscan18	zinc finger and SCAN domain containing 18	93.2962	34.7436	2.63813	1.39952	0.0206464	0.332271
ENSMUSG00000091017	Fam71a	family with sequence similarity 71, member A	368.082	167.699	2.18781	1.12948	0.0207005	0.332744
ENSMUSG00000026463	Atp2b4	ATPase, Ca++ transporting, plasma membrane 4	2585.08	1021.44	2.52931	1.33874	0.0209713	0.335601
ENSMUSG00000079017	Ifi27l2a	interferon, alpha-inducible protein 27 like 2A	68.2572	18.4728	3.5566	1.8305	0.020943	0.335601
ENSMUSG00000085125	Gm16070	predicted gene 16070	72.8454	24.9088	2.8502	1.51106	0.0213082	0.340351
ENSMUSG00000059970	Hspa2	heat shock protein 2	548.94	259.493	2.11115	1.07803	0.0213391	0.340351
ENSMUSG00000027800	Tm4sf1	transmembrane 4 superfamily member 1	3135.75	527.131	5.93933	2.5703	0.0213235	0.340351
ENSMUSG00000090191	9230105E05Rik	RIKEN cDNA 9230105E05 gene	12.2138	0.518172	8.70378	3.12164	0.0213616	0.340447
ENSMUSG00000042485	Mustn1	musculoskeletal, embryonic nuclear protein 1	945.76	13.447	65.5331	6.03415	0.021383	0.340524
ENSMUSG00000086231	Rapgef4os3	Rap guanine nucleotide exchange factor (GEF) 4, opposite strand 3	87.7427	28.3663	3.02192	1.59547	0.0214059	0.340626
ENSMUSG00000069171	Nr2f1	nuclear receptor subfamily 2, group F, member 1	99.3194	17.6188	5.38805	2.42976	0.0214869	0.340695
ENSMUSG00000034450	Gulo	gulonolactone (L-) oxidase	22.2912	2.56443	6.53435	2.70804	0.0214938	0.340695
ENSMUSG00000039959	Hip1	huntingtin interacting protein 1	3569.13	972.336	3.66794	1.87497	0.0214495	0.340695
ENSMUSG00000032092	Mpzl2	myelin protein zero-like 2	154.385	67.3385	2.27375	1.18508	0.0215008	0.340695
ENSMUSG00000024883	Rin1	Ras and Rab interactor 1	106.076	44.0397	2.37737	1.24937	0.021592	0.340951
ENSMUSG00000031565	Fgfr1	fibroblast growth factor receptor 1	1248.81	575.442	2.16814	1.11646	0.0215692	0.340951
ENSMUSG00000052560	Cpne8	copine VIII	311.395	118.653	2.61083	1.38451	0.0217496	0.342914
ENSMUSG00000019997	Ctgf	connective tissue growth factor	2011.8	495.736	4.05206	2.01865	0.0218542	0.343249
ENSMUSG00000042379	Esm1	endothelial cell-specific molecule 1	514.726	258.806	1.98504	0.98917	0.021796	0.343249
ENSMUSG00000064158	Izumo1	izumo sperm-egg fusion 1	18.0376	2.31839	5.737	2.5203	0.0218253	0.343249
ENSMUSG00000040618	Pck2	phosphoenolpyruvate carboxykinase 2 (mitochondrial)	318.866	149.165	2.13009	1.09091	0.021889	0.343534
ENSMUSG00000020641	Rsad2	radical S-adenosyl methionine domain containing 2	3770.9	398.15	9.44982	3.24029	0.0219299	0.343651
ENSMUSG00000073591	Pcdhb22	protocadherin beta 22	41.9505	12.2336	3.24557	1.69847	0.022071	0.345337
ENSMUSG00000060572	Mfap2	microfibrillar-associated protein 2	47.7228	13.9115	3.26746	1.70817	0.0220554	0.345337
ENSMUSG00000027579	Srms	src-related kinase lacking C-terminal regulatory tyrosine and N-terminal myristylation sites	57.1245	19.5577	2.82738	1.49947	0.0222289	0.347281
ENSMUSG00000033389	Arhgap44	Rho GTPase activating protein 44	374.176	164.149	2.27175	1.1838	0.0223031	0.348175
ENSMUSG00000049907	Rasl11b	RAS-like, family 11, member B	172.422	65.1961	2.61982	1.38947	0.022334	0.348394
ENSMUSG00000026398	Nr5a2	nuclear receptor subfamily 5, group A, member 2	59.3895	4.39141	11.2011	3.48556	0.0224965	0.349869
ENSMUSG00000004105	Angptl2	angiopoietin-like 2	378.043	189.761	1.987	0.990594	0.0224787	0.349869
ENSMUSG00000045534	Kcna5	potassium voltage-gated channel, shaker-related subfamily, member 5	308.286	11.1283	25.5012	4.67249	0.0224491	0.349869
ENSMUSG00000028865	Cd164l2	CD164 sialomucin-like 2	56.024	19.815	2.73957	1.45395	0.0227458	0.353172
ENSMUSG00000021719	Rgs7bp	regulator of G-protein signalling 7 binding protein	660.878	18.9011	33.2584	5.05565	0.0229143	0.354003
ENSMUSG00000048450	Msx1	msh homeobox 1	168.574	41.0925	4.02861	2.01028	0.0228961	0.354003
ENSMUSG00000031639	Tlr3	toll-like receptor 3	366.988	183.623	1.99319	0.995077	0.0228766	0.354003
ENSMUSG00000029563	Foxp2	forkhead box P2	159.996	6.23428	22.2546	4.47603	0.0230821	0.356018
ENSMUSG00000011463	Cpb1	carboxypeptidase B1 (tissue)	9.78136	0	10.7814	3.43047	0.0231202	0.356072
ENSMUSG00000017969	Ptgis	prostaglandin I2 (prostacyclin) synthase	529.325	15.3274	32.4807	5.02151	0.0231699	0.356571
ENSMUSG00000050530	Fam171a1	family with sequence similarity 171, member A1	1520.49	792.983	1.91628	0.938309	0.0232621	0.357188
ENSMUSG00000032452	Clstn2	calsyntenin 2	119.899	16.1061	7.06757	2.82121	0.0232484	0.357188
ENSMUSG00000030162	Olr1	oxidized low density lipoprotein (lectin-like) receptor 1	23.9772	3.42414	5.64566	2.49714	0.0232818	0.357225
ENSMUSG00000029752	Asns	asparagine synthetase	92.2216	34.9473	2.59329	1.37478	0.0233538	0.358062
ENSMUSG00000024109	Nrxn1	neurexin I	12.1752	0.245704	10.5765	3.4028	0.0233741	0.358107
ENSMUSG00000033327	Tnxb	tenascin XB	1342.4	343.508	3.89947	1.96328	0.0234522	0.358383
ENSMUSG00000037962	Rflna	refilin A	58.7332	18.6329	3.0425	1.60526	0.0234582	0.358383
ENSMUSG00000029672	Fam3c	family with sequence similarity 3, member C	862.781	441.011	1.95421	0.966582	0.0234617	0.358383
ENSMUSG00000036158	Prickle1	prickle planar cell polarity protein 1	385.984	187.151	2.05678	1.04039	0.0234982	0.358674
ENSMUSG00000038587	Akap12	A kinase (PRKA) anchor protein (gravin) 12	4952.87	1361.39	3.63617	1.86242	0.0236189	0.359674
ENSMUSG00000025212	Sfxn3	sideroflexin 3	722.193	373.091	1.9332	0.950989	0.0236019	0.359674
ENSMUSG00000036570	Fxyd1	FXYD domain-containing ion transport regulator 1	373.313	9.12454	36.9709	5.20832	0.0236364	0.359674
ENSMUSG00000038143	Stox2	storkhead box 2	401.017	199.545	2.00462	1.00333	0.023651	0.359674
ENSMUSG00000032479	Map4	microtubule-associated protein 4	3878.48	1833.03	2.11528	1.08085	0.0236259	0.359674
ENSMUSG00000056328	Myh1	myosin, heavy polypeptide 1, skeletal muscle, adult	9.68484	0	10.6848	3.41749	0.0236918	0.360028
ENSMUSG00000056427	Slit3	slit homolog 3 (Drosophila)	1865.23	129.167	14.3372	3.84169	0.0237289	0.360326
ENSMUSG00000004031	Brinp2	bone morphogenic protein/retinoic acid inducible neural-specific 2	13.2499	0.245704	11.4392	3.51592	0.0238676	0.361867
ENSMUSG00000009876	Cox4i2	cytochrome c oxidase subunit 4I2	91.6487	2.41456	27.1334	4.762	0.0238831	0.361867
ENSMUSG00000030717	Nupr1	nuclear protein transcription regulator 1	571.006	226.215	2.51747	1.33197	0.0239262	0.361986
ENSMUSG00000036923	Stox1	storkhead box 1	46.7833	12.7939	3.46409	1.79248	0.024036	0.362736
ENSMUSG00000074852	Hpse2	heparanase 2	59.7949	0	60.7949	5.92588	0.0240596	0.362736
ENSMUSG00000044528	Tram1l1	translocation associated membrane protein 1-like 1	9.62694	0	10.6269	3.40965	0.0240433	0.362736
ENSMUSG00000043366	Olfr78	olfactory receptor 78	84.1647	8.29109	9.16628	3.19634	0.0240476	0.362736
ENSMUSG00000006526	Tmem110	transmembrane protein 110	177.834	64.7988	2.71789	1.44249	0.0242117	0.3639
ENSMUSG00000031028	Tub	tubby bipartite transcription factor	64.4475	8.26415	7.0646	2.82061	0.0243343	0.365476
ENSMUSG00000020585	Laptm4a	lysosomal-associated protein transmembrane 4A	2512.84	1322.1	1.89996	0.925973	0.0244229	0.36574
ENSMUSG00000046818	Ddit4l	DNA-damage-inducible transcript 4-like	188.993	91.9859	2.04324	1.03086	0.0243934	0.36574
ENSMUSG00000029309	Sparcl1	SPARC-like 1	16084	541.481	29.6507	4.89	0.0244199	0.36574
ENSMUSG00000069892	9930111J21Rik2	RIKEN cDNA 9930111J21 gene 2	1182.19	559.592	2.11061	1.07766	0.0244808	0.366001
ENSMUSG00000021798	Ldb3	LIM domain binding 3	523.965	8.87867	53.1413	5.73176	0.0245115	0.366001
ENSMUSG00000052131	Akr1b7	aldo-keto reductase family 1, member B7	395.919	3.99634	79.4419	6.31183	0.024494	0.366001
ENSMUSG00000018830	Myh11	myosin, heavy polypeptide 11, smooth muscle	45610.4	785.479	57.9944	5.85784	0.0245809	0.366242
ENSMUSG00000041734	Kirrel	kin of IRRE like (Drosophila)	427.509	48.3035	8.69125	3.11956	0.0246156	0.366493
ENSMUSG00000036437	Npy1r	neuropeptide Y receptor Y1	319.593	10.4603	27.9742	4.80603	0.0247462	0.368172
ENSMUSG00000002732	Fkbp7	FK506 binding protein 7	115.047	45.189	2.51244	1.32909	0.024791	0.368305
ENSMUSG00000059772	Slx1b	SLX1 structure-specific endonuclease subunit homolog B (S. cerevisiae)	149.179	69.4608	2.13138	1.09179	0.0247775	0.368305
ENSMUSG00000052727	Map1b	microtubule-associated protein 1B	2558.04	360.134	7.08613	2.825	0.0248667	0.368898
ENSMUSG00000022468	Endou	endonuclease, polyU-specific	64.4798	23.1198	2.71477	1.44083	0.0248526	0.368898
ENSMUSG00000033355	Rtp4	receptor transporter protein 4	610.382	100.884	6.00079	2.58515	0.0249917	0.369462
ENSMUSG00000074480	Mex3a	mex3 RNA binding family member A	75.8442	28.8743	2.57225	1.36303	0.0250052	0.369462
ENSMUSG00000033763	Mtss1l	metastasis suppressor 1-like	1167.14	177.609	6.54021	2.70934	0.0250732	0.370094
ENSMUSG00000029561	Oasl2	2'-5' oligoadenylate synthetase-like 2	1296.22	240.943	5.36169	2.42269	0.0252006	0.370912
ENSMUSG00000021094	Dhrs7	dehydrogenase/reductase (SDR family) member 7	395.753	196.801	2.00582	1.00419	0.0252456	0.371044
ENSMUSG00000068735	Trp53i11	transformation related protein 53 inducible protein 11	672.179	285.313	2.3512	1.2334	0.0252651	0.371065
ENSMUSG00000078349	AW011738	expressed sequence AW011738	92.6784	24.7598	3.63661	1.86259	0.0253616	0.371688
ENSMUSG00000054951	9130008F23Rik	RIKEN cDNA 9130008F23 gene	62.8775	23.7034	2.58578	1.3706	0.0254949	0.372316
ENSMUSG00000074971	Fibin	fin bud initiation factor homolog (zebrafish)	71.0306	2.80997	18.9058	4.24076	0.0254928	0.372316
ENSMUSG00000037166	Ppp1r14a	protein phosphatase 1, regulatory (inhibitor) subunit 14A	300.558	6.92875	38.0335	5.2492	0.0254606	0.372316
ENSMUSG00000091199	Gm2619	predicted gene 2619	32.0082	3.35507	7.57926	2.92206	0.0255655	0.372818
ENSMUSG00000037206	Islr	immunoglobulin superfamily containing leucine-rich repeat	277.823	36.6592	7.40383	2.88827	0.0257305	0.374693
ENSMUSG00000041779	Tram2	translocating chain-associating membrane protein 2	313.287	141.234	2.20965	1.14382	0.0257877	0.375261
ENSMUSG00000028031	Dkk2	dickkopf WNT signaling pathway inhibitor 2	2120.31	307.983	6.86544	2.77935	0.0258657	0.375865
ENSMUSG00000021765	Fst	follistatin	183.092	78.4796	2.31621	1.21177	0.0260864	0.377739
ENSMUSG00000077689	Gm22499	predicted gene, 22499	11.9178	0.245704	10.3699	3.37433	0.0260736	0.377739
ENSMUSG00000058070	Eml1	echinoderm microtubule associated protein like 1	878.23	162.009	5.39377	2.43129	0.0262466	0.37841
ENSMUSG00000052485	Tmem171	transmembrane protein 171	141.791	66.6918	2.10943	1.07685	0.0262655	0.37841
ENSMUSG00000073755	5730409E04Rik	RIKEN cDNA 5730409E04Rik gene	156.45	73.8555	2.10339	1.07272	0.026266	0.37841
ENSMUSG00000031997	Trpc6	transient receptor potential cation channel, subfamily C, member 6	334.895	7.71955	38.5221	5.26761	0.0262504	0.37841
ENSMUSG00000032348	Gsta4	glutathione S-transferase, alpha 4	1324.84	251.16	5.25794	2.3945	0.0262798	0.37841
ENSMUSG00000044949	Ubtd2	ubiquitin domain containing 2	73.1414	29.7032	2.41478	1.27189	0.0263447	0.37908
ENSMUSG00000026574	Dpt	dermatopontin	73.0193	17.39	4.02497	2.00898	0.026394	0.379282
ENSMUSG00000011958	Bnip2	BCL2/adenovirus E1B interacting protein 2	1344.11	613.632	2.18849	1.12993	0.0263956	0.379282
ENSMUSG00000020658	Efr3b	EFR3 homolog B	357.843	73.1503	4.8394	2.27483	0.0264291	0.379393
ENSMUSG00000021214	Akr1c18	aldo-keto reductase family 1, member C18	30.3352	3.2589	7.35758	2.87923	0.0264402	0.379393
ENSMUSG00000047307	Pcdhb13	protocadherin beta 13	24.447	5.72699	3.78282	1.91946	0.0265103	0.379402
ENSMUSG00000027217	Tspan18	tetraspanin 18	771.525	369.965	2.08248	1.0583	0.0265145	0.379402
ENSMUSG00000032194	Kank2	KN motif and ankyrin repeat domains 2	1941.62	460.377	4.21049	2.07399	0.0264864	0.379402
ENSMUSG00000041040	Fam117b	family with sequence similarity 117, member B	2523.54	1348.64	1.87053	0.903444	0.0268129	0.379724
ENSMUSG00000017631	Abr	active BCR-related gene	2527.41	1309.89	1.92878	0.947686	0.0267247	0.379724
ENSMUSG00000021319	Sfrp4	secreted frizzled-related protein 4	230.146	36.303	6.19644	2.63144	0.0266263	0.379724
ENSMUSG00000022598	Psca	prostate stem cell antigen	39.1126	10.4487	3.50367	1.80887	0.026873	0.379724
ENSMUSG00000024098	Twsg1	twisted gastrulation BMP signaling modulator 1	1775.81	908.802	1.95296	0.965663	0.0268527	0.379724
ENSMUSG00000079608	Stard6	StAR-related lipid transfer (START) domain containing 6	9.40811	0	10.4081	3.37964	0.0269653	0.379724
ENSMUSG00000085439	Rapgef4os1	Rap guanine nucleotide exchange factor (GEF) 4, opposite strand 1	40.7342	11.988	3.21328	1.68405	0.0265577	0.379724
ENSMUSG00000027580	Helz2	helicase with zinc finger 2, transcriptional coactivator	4959.82	1515.44	3.27137	1.70989	0.0269669	0.379724
ENSMUSG00000027784	Ppm1l	protein phosphatase 1 (formerly 2C)-like	1315.96	514.624	2.55411	1.35282	0.0269796	0.379724
ENSMUSG00000028184	Adgrl2	adhesion G protein-coupled receptor L2	1818	970.004	1.87332	0.905598	0.0269082	0.379724
ENSMUSG00000006586	Runx1t1	runt-related transcription factor 1; translocated to, 1 (cyclin D-related)	271.87	48.9555	5.46227	2.4495	0.0267168	0.379724
ENSMUSG00000059430	Actg2	actin, gamma 2, smooth muscle, enteric	23.1277	0.245704	19.3688	4.27566	0.0266187	0.379724
ENSMUSG00000030256	Bhlhe41	basic helix-loop-helix family, member e41	268.46	135.64	1.97205	0.979697	0.0267669	0.379724
ENSMUSG00000032135	Mcam	melanoma cell adhesion molecule	2671.71	221.041	12.037	3.58941	0.0268766	0.379724
ENSMUSG00000086918	4930429F24Rik	RIKEN cDNA 4930429F24 gene	47.2208	12.6718	3.52703	1.81845	0.0266173	0.379724
ENSMUSG00000035606	Ky	kyphoscoliosis peptidase	105.877	3.35474	24.5426	4.61722	0.0267442	0.379724
ENSMUSG00000034659	Tmem109	transmembrane protein 109	813.327	442.355	1.83674	0.877146	0.0271086	0.38076
ENSMUSG00000086644	Gm13470	predicted gene 13470	13.2306	1.03634	6.98829	2.80494	0.0271585	0.380941
ENSMUSG00000007207	Stx1a	syntaxin 1A (brain)	66.9251	24.1835	2.69721	1.43147	0.0271781	0.380956
ENSMUSG00000027861	Casq2	calsequestrin 2	26.9502	1.28205	12.2479	3.61446	0.0272071	0.381103
ENSMUSG00000025432	Avil	advillin	74.5442	15.6309	4.54239	2.18345	0.0275089	0.382657
ENSMUSG00000040489	Sox30	SRY (sex determining region Y)-box 30	9.35021	0	10.3502	3.37159	0.0273625	0.382657
ENSMUSG00000023942	Slc29a1	solute carrier family 29 (nucleoside transporters), member 1	376.267	187.782	1.99843	0.998867	0.0273814	0.382657
ENSMUSG00000003279	Dlgap1	discs, large (Drosophila) homolog-associated protein 1	82.807	34.9545	2.33092	1.2209	0.0274732	0.382657
ENSMUSG00000061013	Mkx	mohawk homeobox	52.0214	6.84829	6.75579	2.75612	0.0274536	0.382657
ENSMUSG00000027684	Mecom	MDS1 and EVI1 complex locus	2712.78	1329.16	2.04019	1.0287	0.0273698	0.382657
ENSMUSG00000015053	Gata2	GATA binding protein 2	982.512	452.912	2.16675	1.11553	0.0274056	0.382657
ENSMUSG00000000204	Slfn4	schlafen 4	86.7644	0.763876	49.7565	5.63681	0.0275867	0.382775
ENSMUSG00000034488	Edil3	EGF-like repeats and discoidin I-like domains 3	58.1091	20.5675	2.74066	1.45452	0.027583	0.382775
ENSMUSG00000032177	Pde4a	phosphodiesterase 4A, cAMP specific	270.435	134.772	1.9992	0.999426	0.0275759	0.382775
ENSMUSG00000024048	Myl12a	myosin, light chain 12A, regulatory, non-sarcomeric	1752.79	950.475	1.84323	0.882237	0.0277149	0.383992
ENSMUSG00000057346	Apol9a	apolipoprotein L 9a	233.028	14.2686	15.3274	3.93804	0.027913	0.386262
ENSMUSG00000012428	Steap4	STEAP family member 4	90.5614	31.1866	2.8447	1.50828	0.0279795	0.386767
ENSMUSG00000018909	Arrb1	arrestin, beta 1	2299.49	1217.02	1.88871	0.917402	0.0280193	0.386952
ENSMUSG00000038530	Rgs4	regulator of G-protein signaling 4	452.181	15.082	28.1794	4.81657	0.0280795	0.387523
ENSMUSG00000021280	Exoc3l4	exocyst complex component 3-like 4	124.384	53.903	2.28374	1.1914	0.0281361	0.387753
ENSMUSG00000025076	Casp7	caspase 7	311.002	161.658	1.91815	0.939714	0.0281526	0.387753
ENSMUSG00000034898	Filip1	filamin A interacting protein 1	1383.7	100.944	13.5829	3.76372	0.0281793	0.387861
ENSMUSG00000060240	Cend1	cell cycle exit and neuronal differentiation 1	44.2992	8.26499	4.88929	2.28963	0.0282305	0.388306
ENSMUSG00000044807	Zfp354c	zinc finger protein 354C	144.442	60.6299	2.35993	1.23875	0.0282551	0.388319
ENSMUSG00000028073	Pear1	platelet endothelial aggregation receptor 1	638.755	253.167	2.51706	1.33174	0.0283418	0.389058
ENSMUSG00000038521	C1s1	complement component 1, s subcomponent 1	357.122	38.7585	9.00744	3.17112	0.0283966	0.38944
ENSMUSG00000030329	Pianp	PILR alpha associated neural protein	338.403	165.648	2.03665	1.0262	0.0284497	0.389759
ENSMUSG00000005124	Wisp1	WNT1 inducible signaling pathway protein 1	135.51	51.1478	2.61776	1.38833	0.0285437	0.390528
ENSMUSG00000037887	Dusp8	dual specificity phosphatase 8	355.617	104.022	3.39563	1.76368	0.0285414	0.390528
ENSMUSG00000056553	Ptprn2	protein tyrosine phosphatase, receptor type, N polypeptide 2	55.4771	22.1866	2.43577	1.28438	0.0285876	0.390869
ENSMUSG00000020439	Smtn	smoothelin	2406.89	1141.02	2.10845	1.07618	0.0288596	0.392785
ENSMUSG00000087291	Gm11946	predicted gene 11946	81.4298	32.7594	2.44169	1.28788	0.0288083	0.392785
ENSMUSG00000035184	Fam124a	family with sequence similarity 124, member A	198.626	103.961	1.9019	0.927442	0.0288804	0.392785
ENSMUSG00000003665	Has1	hyaluronan synthase 1	127.19	19.0232	6.40207	2.67854	0.0288237	0.392785
ENSMUSG00000053164	Gpr21	G protein-coupled receptor 21	79.2999	25.0487	3.08269	1.62419	0.0288758	0.392785
ENSMUSG00000034118	Tpst1	protein-tyrosine sulfotransferase 1	201.084	81.5782	2.44719	1.29112	0.0289431	0.393118
ENSMUSG00000035783	Acta2	actin, alpha 2, smooth muscle, aorta	15151.6	236.973	63.6736	5.99262	0.0291197	0.393958
ENSMUSG00000050896	Rtn4rl2	reticulon 4 receptor-like 2	34.3507	10.7055	3.02001	1.59455	0.0291057	0.393958
ENSMUSG00000022123	Scel	sciellin	224.894	121.976	1.8369	0.877276	0.029152	0.393962
ENSMUSG00000027712	Anxa5	annexin A5	1765.03	947.513	1.86189	0.896768	0.0291583	0.393962
ENSMUSG00000048332	Lhfp	lipoma HMGIC fusion partner	444.659	44.862	9.7174	3.28057	0.0291864	0.394083
ENSMUSG00000020315	Sptbn1	spectrin beta, non-erythrocytic 1	38733.1	22095.5	1.75295	0.809786	0.029417	0.394096
ENSMUSG00000021268	Meg3	maternally expressed 3	60.239	21.1969	2.75891	1.4641	0.0293811	0.394096
ENSMUSG00000047557	Lxn	latexin	141.778	61.4232	2.28726	1.19362	0.0294166	0.394096
ENSMUSG00000023964	Calcr	calcitonin receptor	26.783	6.6138	3.64903	1.86751	0.0292853	0.394096
ENSMUSG00000040703	Cyp2s1	cytochrome P450, family 2, subfamily s, polypeptide 1	200.1	102.561	1.94185	0.957434	0.0294126	0.394096
ENSMUSG00000021411	Pxdc1	PX domain containing 1	143.207	55.8962	2.53456	1.34174	0.0294524	0.394149
ENSMUSG00000072235	Tuba1a	tubulin, alpha 1A	205.048	90.676	2.24757	1.16837	0.0294593	0.394149
ENSMUSG00000049265	Kcnk3	potassium channel, subfamily K, member 3	255.596	5.5241	39.3304	5.29757	0.0295581	0.395215
ENSMUSG00000039474	Wfs1	wolframin ER transmembrane glycoprotein	507.775	280.421	1.80788	0.854299	0.0296312	0.395761
ENSMUSG00000034910	Pygo1	pygopus 1	91.8482	9.76514	8.62489	3.10851	0.0296784	0.396052
ENSMUSG00000019970	Sgk1	serum/glucocorticoid regulated kinase 1	4078.51	2259.46	1.80473	0.85178	0.0297364	0.396219
ENSMUSG00000043003	Rasef	RAS and EF hand domain containing	65.5158	27.2611	2.35362	1.23488	0.0297426	0.396219
ENSMUSG00000032667	Pon2	paraoxonase 2	398.616	200.366	1.98452	0.988793	0.029788	0.396436
ENSMUSG00000055980	Irs1	insulin receptor substrate 1	716.768	406.624	1.76086	0.816278	0.0301253	0.398384
ENSMUSG00000023064	Sncg	synuclein, gamma	2223.98	121.281	18.1956	4.18552	0.0301137	0.398384
ENSMUSG00000039529	Atp8b1	ATPase, class I, type 8B, member 1	652.584	257.401	2.52934	1.33876	0.0301418	0.398384
ENSMUSG00000052684	Jun	jun proto-oncogene	29277.7	16537.5	1.77033	0.82402	0.0301434	0.398384
ENSMUSG00000043505	Gimap5	GTPase, IMAP family member 5	420.477	196.912	2.12962	1.0906	0.0301168	0.398384
ENSMUSG00000020181	Nav3	neuron navigator 3	43.2504	12.0845	3.38189	1.75783	0.0301843	0.398669
ENSMUSG00000040283	Btnl9	butyrophilin-like 9	629.252	194.357	3.22616	1.68982	0.0302373	0.399113
ENSMUSG00000031681	Smad1	SMAD family member 1	601.451	298.698	2.01019	1.00733	0.0303011	0.399443
ENSMUSG00000026564	Dusp27	dual specificity phosphatase 27 (putative)	60.9532	0.790806	34.5952	5.1125	0.0303987	0.39976
ENSMUSG00000019820	Utrn	utrophin	15458.3	4713.09	3.27939	1.71343	0.0304211	0.39976
ENSMUSG00000062561	Gm10118	predicted gene 10118	76.8286	1.30898	33.7069	5.07497	0.0304389	0.39976
ENSMUSG00000028860	Sytl1	synaptotagmin-like 1	78.9524	31.1662	2.4856	1.3136	0.0303618	0.39976
ENSMUSG00000054083	Capn12	calpain 12	48.0059	14.8134	3.09901	1.63181	0.0304611	0.39976
ENSMUSG00000031511	Arhgef7	Rho guanine nucleotide exchange factor (GEF7)	2504.62	1270.89	1.97	0.978193	0.0305176	0.399943
ENSMUSG00000001435	Col18a1	collagen, type XVIII, alpha 1	7773.03	2511.26	3.09443	1.62968	0.0306914	0.401552
ENSMUSG00000063687	Pcdhb5	protocadherin beta 5	14.3503	1.28205	6.72654	2.74987	0.0307341	0.401552
ENSMUSG00000067818	Myl9	myosin, light polypeptide 9, regulatory	5171	114.675	44.7114	5.48257	0.0307318	0.401552
ENSMUSG00000086596	Susd5	sushi domain containing 5	1139	16.4862	65.1943	6.02667	0.030714	0.401552
ENSMUSG00000033831	Fgb	fibrinogen beta chain	38.3468	10.1074	3.54241	1.82473	0.0307706	0.401603
ENSMUSG00000074415	2610203C20Rik	RIKEN cDNA 2610203C20 gene	60.5286	11.2091	5.03956	2.3333	0.030786	0.401603
ENSMUSG00000038780	Smurf1	SMAD specific E3 ubiquitin protein ligase 1	813.951	419.498	1.93806	0.954616	0.0309014	0.402461
ENSMUSG00000068373	D430041D05Rik	RIKEN cDNA D430041D05 gene	41.0496	15.2043	2.59497	1.37572	0.0310626	0.404305
ENSMUSG00000004044	Cavin1	caveolae associated 1	5819.92	819.11	7.09773	2.82736	0.0311771	0.405283
ENSMUSG00000047878	A4galt	alpha 1,4-galactosyltransferase	390.997	201.347	1.93725	0.95401	0.0312106	0.405462
ENSMUSG00000074482	Gm16589	predicted gene 16589	280.127	134.053	2.0816	1.05769	0.0312623	0.405878
ENSMUSG00000071637	Cebpd	CCAAT/enhancer binding protein (C/EBP), delta	2258.94	776.888	2.90523	1.53865	0.0313211	0.406129
ENSMUSG00000051339	2900026A02Rik	RIKEN cDNA 2900026A02 gene	1578.02	643.401	2.45037	1.293	0.0313202	0.406129
ENSMUSG00000085705	Gm16046	predicted gene 16046	34.7367	7.21709	4.34907	2.12071	0.0315221	0.407964
ENSMUSG00000066178	6030445D17Rik	RIKEN cDNA 6030445D17 gene	31.6221	7.05185	4.05151	2.01846	0.0316051	0.408526
ENSMUSG00000081113	Gm7308	predicted pseudogene 7308	1905.09	1029.23	1.85017	0.887658	0.0316756	0.408923
ENSMUSG00000045657	Pcdhb10	protocadherin beta 10	13.1147	0.491408	9.46404	3.24246	0.0317768	0.409291
ENSMUSG00000019055	Plod1	procollagen-lysine, 2-oxoglutarate 5-dioxygenase 1	787.844	437.814	1.79767	0.846132	0.0317557	0.409291
ENSMUSG00000084965	Gm13857	predicted gene 13857	13.7196	0	14.7196	3.87967	0.0317836	0.409291
ENSMUSG00000033684	Qsox1	quiescin Q6 sulfhydryl oxidase 1	463.958	245.036	1.8898	0.918231	0.0320462	0.409852
ENSMUSG00000019917	Sept10	septin 10	457.588	248.581	1.83743	0.877692	0.0320104	0.409852
ENSMUSG00000058396	Gpr182	G protein-coupled receptor 182	162.345	71.1837	2.26291	1.17818	0.0320258	0.409852
ENSMUSG00000041592	Sdk2	sidekick cell adhesion molecule 2	79.744	24.9898	3.10676	1.63541	0.0318545	0.409852
ENSMUSG00000021208	Ifi27l2b	interferon, alpha-inducible protein 27 like 2B	12.4069	0.518172	8.83093	3.14257	0.0319313	0.409852
ENSMUSG00000085276	Gm15812	predicted gene 15812	15.5858	1.58161	6.4246	2.68361	0.0319559	0.409852
ENSMUSG00000038210	Hoxa11	homeobox A11	11.0748	0.518172	7.95352	2.99159	0.0319744	0.409852
ENSMUSG00000031840	Rab3a	RAB3A, member RAS oncogene family	285.243	137.807	2.06217	1.04416	0.032025	0.409852
ENSMUSG00000079323	Gm20661	predicted gene 20661	8.97696	0	9.97696	3.3186	0.0319266	0.409852
ENSMUSG00000029428	Stx2	syntaxin 2	545.897	275.177	1.98024	0.985675	0.0321147	0.410474
ENSMUSG00000086578	Gm13583	predicted gene 13583	20.3864	2.80997	5.61328	2.48884	0.0322588	0.411588
ENSMUSG00000027460	Angpt4	angiopoietin 4	133.123	5.34763	21.1296	4.40119	0.0322865	0.411588
ENSMUSG00000015745	Plekho1	pleckstrin homology domain containing, family O member 1	875.947	435.092	2.01092	1.00786	0.0322986	0.411588
ENSMUSG00000022607	Ptk2	PTK2 protein tyrosine kinase 2	1760.23	975.455	1.8037	0.850955	0.032347	0.411654
ENSMUSG00000039405	Prss23	protease, serine 23	685.912	327.782	2.08926	1.06299	0.0323685	0.411673
ENSMUSG00000061322	Dnaic1	dynein, axonemal, intermediate chain 1	12.5099	1.03634	6.63438	2.72996	0.0324652	0.412649
ENSMUSG00000049791	Fzd4	frizzled class receptor 4	1929.69	1142.89	1.68783	0.755169	0.0325077	0.412934
ENSMUSG00000045876	Pcdhb8	protocadherin beta 8	8.89975	0	9.89975	3.30739	0.0325571	0.413069
ENSMUSG00000025855	Prkar1b	protein kinase, cAMP dependent regulatory, type I beta	137.731	65.7673	2.07782	1.05507	0.0325785	0.413069
ENSMUSG00000077785	Gm23910	predicted gene, 23910	8.86115	0	9.86115	3.30176	0.0328782	0.415611
ENSMUSG00000029352	Crybb3	crystallin, beta B3	29.3892	6.65628	3.96918	1.98884	0.0329583	0.415611
ENSMUSG00000068748	Ptprz1	protein tyrosine phosphatase, receptor type Z, polypeptide 1	74.5442	16.3679	4.34965	2.1209	0.0329455	0.415611
ENSMUSG00000030494	Rhpn2	rhophilin, Rho GTPase binding protein 2	367.38	170.41	2.14911	1.10374	0.0329488	0.415611
ENSMUSG00000030889	Vwa3a	von Willebrand factor A domain containing 3A	53.006	15.9295	3.19005	1.67358	0.0328956	0.415611
ENSMUSG00000032495	Lrrc2	leucine rich repeat containing 2	16.6026	2.22255	5.4623	2.44951	0.0329305	0.415611
ENSMUSG00000049502	Dtx3l	deltex 3-like, E3 ubiquitin ligase	1614.2	572.682	2.8155	1.49339	0.033048	0.416457
ENSMUSG00000032220	Myo1e	myosin IE	2485.36	1235.74	2.01042	1.0075	0.0331197	0.41685
ENSMUSG00000020427	Igfbp3	insulin-like growth factor binding protein 3	2070.81	951.524	2.17507	1.12106	0.0331898	0.416942
ENSMUSG00000040543	Pitpnm3	PITPNM family member 3	417.851	130.781	3.17838	1.66829	0.033248	0.416942
ENSMUSG00000022203	Efs	embryonal Fyn-associated substrate	22.8961	4.48725	4.35484	2.12262	0.0332485	0.416942
ENSMUSG00000047976	Kcna1	potassium voltage-gated channel, shaker-related subfamily, member 1	24.151	4.33772	4.71193	2.23632	0.033248	0.416942
ENSMUSG00000074272	Ceacam1	carcinoembryonic antigen-related cell adhesion molecule 1	950.331	491.149	1.93302	0.950853	0.0331876	0.416942
ENSMUSG00000052143	Gm9869	predicted gene 9869	70.7604	15.2469	4.41686	2.14302	0.0331802	0.416942
ENSMUSG00000024079	Eif2ak2	eukaryotic translation initiation factor 2-alpha kinase 2	1419.08	544.906	2.60133	1.37925	0.0333114	0.417478
ENSMUSG00000021461	Fancc	Fanconi anemia, complementation group C	435.592	193.724	2.24211	1.16486	0.0333456	0.417652
ENSMUSG00000061603	Akap6	A kinase (PRKA) anchor protein 6	1150.36	20.7434	52.9519	5.72661	0.0334367	0.41803
ENSMUSG00000021458	2010111I01Rik	RIKEN cDNA 2010111I01 gene	1346.44	731.373	1.83983	0.879574	0.033431	0.41803
ENSMUSG00000006221	Hspb7	heat shock protein family, member 7 (cardiovascular)	440.051	55.1338	7.85715	2.97401	0.0334013	0.41803
ENSMUSG00000078202	Nrarp	Notch-regulated ankyrin repeat protein	284.618	82.7551	3.41016	1.76984	0.0334705	0.418151
ENSMUSG00000026678	Rgs5	regulator of G-protein signaling 5	24044.9	527.304	45.5153	5.50828	0.0336612	0.418296
ENSMUSG00000075702	Selenom	selenoprotein M	486.372	273.79	1.77362	0.826695	0.0336245	0.418296
ENSMUSG00000025576	Rbfox3	RNA binding protein, fox-1 homolog (C. elegans) 3	19.4662	3.89984	4.17691	2.06244	0.0335985	0.418296
ENSMUSG00000016024	Lbp	lipopolysaccharide binding protein	121	39.1237	3.04059	1.60435	0.0335862	0.418296
ENSMUSG00000092164	Rergl	RERG/RAS-like	481.725	9.397	46.4292	5.53696	0.0336074	0.418296
ENSMUSG00000041012	Cmtm8	CKLF-like MARVEL transmembrane domain containing 8	247.379	132.483	1.86075	0.895883	0.033719	0.418762
ENSMUSG00000039304	Tnfsf10	tumor necrosis factor (ligand) superfamily, member 10	1319.54	625.727	2.10704	1.07522	0.033772	0.419059
ENSMUSG00000028057	Rit1	Ras-like without CAAX 1	496.121	251.283	1.97049	0.978553	0.0337836	0.419059
ENSMUSG00000026204	Ptprn	protein tyrosine phosphatase, receptor type, N	24.2475	6.36793	3.42667	1.77681	0.0338271	0.419296
ENSMUSG00000078185	Chml	choroideremia-like	213.877	102.344	2.07925	1.05606	0.0338742	0.419296
ENSMUSG00000035431	Sstr1	somatostatin receptor 1	16.9758	1.50099	7.18748	2.84549	0.0339129	0.419296
ENSMUSG00000028464	Tpm2	tropomyosin 2, beta	4948.6	139.977	35.1094	5.13378	0.0339249	0.419296
ENSMUSG00000032118	Fez1	fasciculation and elongation protein zeta 1 (zygin I)	51.6288	7.54276	6.16064	2.62308	0.0339105	0.419296
ENSMUSG00000032085	Tagln	transgelin	4778.68	149.801	31.6954	4.9862	0.0339582	0.419456
ENSMUSG00000017314	Mpp2	membrane protein, palmitoylated 2 (MAGUK p55 subfamily member 2)	205.209	55.3825	3.65732	1.87079	0.0341251	0.420416
ENSMUSG00000078640	Gm11627	predicted gene 11627	15.4442	0	16.4442	4.03951	0.0341526	0.420416
ENSMUSG00000040666	Sh3bgr	SH3-binding domain glutamic acid-rich protein	139.255	5.30516	22.2446	4.47538	0.0341418	0.420416
ENSMUSG00000028469	Npr2	natriuretic peptide receptor 2	506.263	261.385	1.93328	0.951047	0.0341956	0.420416
ENSMUSG00000026674	Ddr2	discoidin domain receptor family, member 2	568.026	64.748	8.65465	3.11348	0.0344196	0.421865
ENSMUSG00000089715	Cbx6	chromobox 6	1194.91	629.299	1.89737	0.924	0.0344167	0.421865
ENSMUSG00000015452	Ager	advanced glycosylation end product-specific receptor	36.3648	8.62191	3.8833	1.95728	0.0344826	0.422143
ENSMUSG00000027254	Map1a	microtubule-associated protein 1 A	1430.37	98.1947	14.4299	3.85099	0.0345263	0.422143
ENSMUSG00000040896	Kcnd3	potassium voltage-gated channel, Shal-related family, member 3	60.6316	22.079	2.67046	1.41709	0.0345343	0.422143
ENSMUSG00000001985	Grik3	glutamate receptor, ionotropic, kainate 3	19.6657	3.16323	4.96387	2.31147	0.0346062	0.422143
ENSMUSG00000070720	Tmem200b	transmembrane protein 200B	91.1661	21.3419	4.12526	2.04448	0.0345933	0.422143
ENSMUSG00000029761	Cald1	caldesmon 1	12008.9	1047.95	11.4494	3.5172	0.0344843	0.422143
ENSMUSG00000078117	Gm16485	predicted gene 16485	65.548	19.3123	3.27623	1.71204	0.0346316	0.422202
ENSMUSG00000047658	Gal3st3	galactose-3-O-sulfotransferase 3	11.0748	0.245704	9.69316	3.27697	0.0346699	0.422419
ENSMUSG00000017652	Cd40	CD40 antigen	268.144	103.527	2.57489	1.36451	0.0346906	0.422421
ENSMUSG00000022723	Crybg3	beta-gamma crystallin domain containing 3	968.445	530.615	1.82358	0.866777	0.0347807	0.423268
ENSMUSG00000024112	Cacna1h	calcium channel, voltage-dependent, T type, alpha 1H subunit	316.433	10.8977	26.6803	4.7377	0.0348445	0.423544
ENSMUSG00000000127	Fer	fer (fms/fps related) protein kinase	786.834	413.906	1.89882	0.925106	0.0348365	0.423544
ENSMUSG00000039057	Myo16	myosin XVI	14.5498	0.737112	8.95153	3.16213	0.0349131	0.424127
ENSMUSG00000020787	P2rx1	purinergic receptor P2X, ligand-gated ion channel, 1	665.106	26.2632	24.4324	4.61072	0.0350119	0.425076
ENSMUSG00000051486	Pcdhb11	protocadherin beta 11	38.4433	12.2455	2.97788	1.57428	0.0350609	0.42517
ENSMUSG00000048696	Mex3d	mex3 RNA binding family member D	202.899	92.6453	2.17735	1.12258	0.0350994	0.425333
ENSMUSG00000032744	Heyl	hairy/enhancer-of-split related with YRPW motif-like	577.46	49.506	11.4533	3.51769	0.0351157	0.425333
ENSMUSG00000054052	Rdh19	retinol dehydrogenase 19	28.6299	1.28221	12.9829	3.69855	0.0352133	0.425926
ENSMUSG00000076612	Ighg2c	immunoglobulin heavy constant gamma 2C	1397.64	242.477	5.74445	2.52217	0.0352266	0.425926
ENSMUSG00000000489	Pdgfb	platelet derived growth factor, B polypeptide	1079.46	570.729	1.88982	0.918247	0.0354052	0.427082
ENSMUSG00000040118	Cacna2d1	calcium channel, voltage-dependent, alpha2/delta subunit 1	529.686	29.5958	17.345	4.11645	0.035387	0.427082
ENSMUSG00000026211	Obsl1	obscurin-like 1	153.651	23.4044	6.33702	2.6638	0.0355233	0.428108
ENSMUSG00000039501	Znfx1	zinc finger, NFX1-type containing 1	6149.29	3360.9	1.82941	0.871376	0.0355319	0.428108
ENSMUSG00000024778	Fas	Fas (TNF receptor superfamily member 6)	431.371	182.858	2.35166	1.23368	0.0356156	0.428866
ENSMUSG00000047988	4933428G20Rik	RIKEN cDNA 4933428G20 gene	17.1688	0	18.1688	4.18339	0.0357372	0.429711
ENSMUSG00000030605	Mfge8	milk fat globule-EGF factor 8 protein	2361.93	496.993	4.74491	2.24638	0.035746	0.429711
ENSMUSG00000027208	Fgf7	fibroblast growth factor 7	21.5447	4.04987	4.46442	2.15847	0.0357757	0.429789
ENSMUSG00000036745	Ttll7	tubulin tyrosine ligase-like family, member 7	421.782	98.0321	4.26914	2.09395	0.0358098	0.429947
ENSMUSG00000035441	Myo1d	myosin ID	2397.6	1110.92	2.15718	1.10915	0.035838	0.430035
ENSMUSG00000027335	Adra1d	adrenergic receptor, alpha 1d	16.1714	2.34532	5.13296	2.35979	0.0358679	0.430144
ENSMUSG00000024678	Ms4a4d	membrane-spanning 4-domains, subfamily A, member 4D	96.6294	10.3909	8.57085	3.09944	0.0359008	0.430288
ENSMUSG00000001300	Efnb2	ephrin B2	3140.84	848.058	3.70038	1.88767	0.0360938	0.431661
ENSMUSG00000020638	Cmpk2	cytidine monophosphate (UMP-CMP) kinase 2, mitochondrial	725.345	135.242	5.3313	2.41449	0.0363257	0.431809
ENSMUSG00000044258	Ctla2a	cytotoxic T lymphocyte-associated protein 2 alpha	798.861	353.619	2.25555	1.17348	0.0362864	0.431809
ENSMUSG00000086495	Gm13778	predicted gene 13778	12.3683	0.913575	6.98601	2.80447	0.0363423	0.431809
ENSMUSG00000028259	Fhl5	four and a half LIM domains 5	18.0311	0	19.0311	4.25029	0.0363114	0.431809
ENSMUSG00000036052	Dnajb5	DnaJ heat shock protein family (Hsp40) member B5	383.616	195.014	1.96218	0.972459	0.0362002	0.431809
ENSMUSG00000039693	Msantd3	Myb/SANT-like DNA-binding domain containing 3	84.6539	37.8453	2.205	1.14078	0.0361705	0.431809
ENSMUSG00000045362	Tnfrsf26	tumor necrosis factor receptor superfamily, member 26	73.6949	28.291	2.5501	1.35055	0.0363169	0.431809
ENSMUSG00000010660	Plcd1	phospholipase C, delta 1	220.737	75.4266	2.90131	1.5367	0.0365716	0.433533
ENSMUSG00000085604	Dhx58os	DEAH (Asp-Glu-Ala-His) box polypeptide 58, opposite strand	12.4069	0.245704	10.7625	3.42794	0.0366762	0.434522
ENSMUSG00000087326	Gm12503	predicted gene 12503	16.8986	3.10903	4.35592	2.12298	0.0367839	0.435302
ENSMUSG00000028128	F3	coagulation factor III	779.15	301.53	2.57875	1.36667	0.0369344	0.436827
ENSMUSG00000015647	Lama5	laminin, alpha 5	5064.93	2089.27	2.42358	1.27714	0.0372269	0.439529
ENSMUSG00000025900	Rp1	retinitis pigmentosa 1 (human)	22.3105	4.26864	4.42439	2.14548	0.0375417	0.439692
ENSMUSG00000007097	Atp1a2	ATPase, Na+/K+ transporting, alpha 2 polypeptide	774.271	48.5772	15.6377	3.96695	0.0376818	0.439692
ENSMUSG00000019326	Aoc3	amine oxidase, copper containing 3	1069.65	26.8775	38.4056	5.26325	0.0375847	0.439692
ENSMUSG00000021253	Tgfb3	transforming growth factor, beta 3	463.9	87.6263	5.24562	2.39111	0.0374905	0.439692
ENSMUSG00000025279	Dnase1l3	deoxyribonuclease 1-like 3	215.409	98.1349	2.18298	1.1263	0.0376807	0.439692
ENSMUSG00000085912	Trp53cor1	tumor protein p53 pathway corepressor 1	57.3947	19.969	2.78481	1.47758	0.0376695	0.439692
ENSMUSG00000064147	Rab44	RAB44, member RAS oncogene family	16.21	2.59086	4.79273	2.26085	0.037449	0.439692
ENSMUSG00000027951	Adar	adenosine deaminase, RNA-specific	1666.52	877.95	1.89717	0.923851	0.037631	0.439692
ENSMUSG00000048065	Cyb5r2	cytochrome b5 reductase 2	78.9458	2.09978	25.7907	4.68878	0.0376951	0.439692
ENSMUSG00000039952	Dag1	dystroglycan 1	4138.55	2320.23	1.78334	0.834584	0.037489	0.439692
ENSMUSG00000044037	Als2cl	ALS2 C-terminal like	972.686	524.499	1.85288	0.889769	0.0373755	0.439692
ENSMUSG00000008384	Sertad1	SERTA domain containing 1	654.457	295.269	2.21237	1.14559	0.0378421	0.44023
ENSMUSG00000079505	Gm11131	predicted gene 11131	55.1103	17.7618	2.99066	1.58047	0.0379117	0.44079
ENSMUSG00000041817	Fam169a	family with sequence similarity 169, member A	53.8683	17.3512	2.9899	1.5801	0.0379768	0.441298
ENSMUSG00000043259	Fam13c	family with sequence similarity 13, member C	309.876	71.821	4.26904	2.09391	0.0381099	0.442076
ENSMUSG00000030095	Tmem43	transmembrane protein 43	516.405	273.325	1.8861	0.915407	0.0380777	0.442076
ENSMUSG00000048142	Nat8l	N-acetyltransferase 8-like	33.5977	7.09433	4.27431	2.09569	0.038157	0.442144
ENSMUSG00000017774	Myo1c	myosin IC	4918.37	2810.04	1.75001	0.807366	0.0382757	0.442276
ENSMUSG00000040690	Col16a1	collagen, type XVI, alpha 1	184.167	81.8623	2.23463	1.16004	0.0382713	0.442276
ENSMUSG00000087690	Gm16031	predicted gene 16031	21.9566	4.75972	3.98571	1.99484	0.0383733	0.442886
ENSMUSG00000064325	Hhip	Hedgehog-interacting protein	74.8662	9.47829	7.24032	2.85605	0.038393	0.442886
ENSMUSG00000041000	Trim62	tripartite motif-containing 62	171.901	79.6345	2.14426	1.10048	0.038547	0.444413
ENSMUSG00000048285	Frmd6	FERM domain containing 6	259.624	67.4417	3.80797	1.92902	0.0386315	0.444889
ENSMUSG00000024084	Qpct	glutaminyl-peptide cyclotransferase (glutaminyl cyclase)	89.5638	35.8075	2.46047	1.29893	0.0386834	0.444988
ENSMUSG00000028389	Zfp37	zinc finger protein 37	148.239	66.4952	2.21111	1.14477	0.0387511	0.445361
ENSMUSG00000035279	Ssc5d	scavenger receptor cysteine rich family, 5 domains	31.5835	8.53729	3.41644	1.77249	0.038759	0.445361
ENSMUSG00000060591	Ifitm2	interferon induced transmembrane protein 2	603.826	321.166	1.87737	0.908713	0.0387989	0.445571
ENSMUSG00000074766	Ism1	isthmin 1, angiogenesis inhibitor	140.021	9.74993	13.1183	3.71351	0.038862	0.445798
ENSMUSG00000029096	Htra3	HtrA serine peptidase 3	54.6019	18.2917	2.88217	1.52715	0.0388897	0.445867
ENSMUSG00000070327	Rnf213	ring finger protein 213	11485.1	5106.28	2.24897	1.16927	0.0390094	0.446494
ENSMUSG00000056121	Fez2	fasciculation and elongation protein zeta 2 (zygin II)	1043.25	550.241	1.89437	0.921716	0.038991	0.446494
ENSMUSG00000070423	Olfr558	olfactory receptor 558	640.852	17.6312	34.4503	5.10645	0.0389851	0.446494
ENSMUSG00000026556	Vangl2	vang-like 2 (van gogh, Drosophila)	166.618	63.2838	2.60746	1.38265	0.0390716	0.446709
ENSMUSG00000043556	Fbxl7	F-box and leucine-rich repeat protein 7	141.366	39.4571	3.51894	1.81514	0.0391292	0.44712
ENSMUSG00000038146	Notch3	notch 3	3219.4	140.775	22.7148	4.50556	0.0393352	0.448726
ENSMUSG00000002325	Irf9	interferon regulatory factor 9	1333.28	511.901	2.60144	1.37931	0.0394068	0.448797
ENSMUSG00000071847	Apcdd1	adenomatosis polyposis coli down-regulated 1	120.169	9.73888	11.2832	3.49611	0.0393943	0.448797
ENSMUSG00000027858	Tspan2	tetraspanin 2	394.246	17.9764	20.8283	4.38047	0.0393815	0.448797
ENSMUSG00000022096	Hr	hairless	405.54	68.5186	5.84793	2.54793	0.0399187	0.450105
ENSMUSG00000022257	Laptm4b	lysosomal-associated protein transmembrane 4B	651.503	384.895	1.69088	0.757777	0.0397599	0.450105
ENSMUSG00000050821	Fam131a	family with sequence similarity 131, member A	57.6135	22.0952	2.53791	1.34364	0.0399304	0.450105
ENSMUSG00000073555	Gm4951	predicted gene 4951	716.001	68.0408	10.3852	3.37645	0.0397308	0.450105
ENSMUSG00000039787	Cercam	cerebral endothelial cell adhesion molecule	61.3523	14.472	4.03001	2.01078	0.0399588	0.450105
ENSMUSG00000058793	Cds2	CDP-diacylglycerol synthase (phosphatidate cytidylyltransferase) 2	2836.48	1600.62	1.77163	0.825076	0.0397478	0.450105
ENSMUSG00000039058	Ak5	adenylate kinase 5	35.2516	10.4604	3.16319	1.66138	0.039945	0.450105
ENSMUSG00000028698	Pik3r3	phosphoinositide-3-kinase regulatory subunit 3	1129.99	475.757	2.37226	1.24626	0.0397099	0.450105
ENSMUSG00000006651	Aplp1	amyloid beta (A4) precursor-like protein 1	99.1714	39.3916	2.48001	1.31035	0.0398287	0.450105
ENSMUSG00000046152	Fut10	fucosyltransferase 10	74.3705	26.9407	2.69751	1.43163	0.0397723	0.450105
ENSMUSG00000058571	Gpc6	glypican 6	1297.62	46.3181	27.4444	4.77844	0.0400183	0.450366
ENSMUSG00000074896	Ifit3	interferon-induced protein with tetratricopeptide repeats 3	2135.41	245.86	8.65433	3.11342	0.0400695	0.450366
ENSMUSG00000086969	4930443O20Rik	RIKEN cDNA 4930443O20 gene	18.2886	2.56426	5.41166	2.43607	0.0400569	0.450366
ENSMUSG00000022074	Tnfrsf10b	tumor necrosis factor receptor superfamily, member 10b	183.561	76.1548	2.39209	1.25827	0.0401199	0.450415
ENSMUSG00000021373	Cap2	CAP, adenylate cyclase-associated protein, 2 (yeast)	261.143	9.54687	24.855	4.63547	0.0402371	0.451054
ENSMUSG00000017817	Jph2	junctophilin 2	556.629	10.5568	48.2513	5.59249	0.0403021	0.451054
ENSMUSG00000051331	Cacna1c	calcium channel, voltage-dependent, L type, alpha 1C subunit	634.23	19.5427	30.9225	4.95058	0.0403163	0.451054
ENSMUSG00000010066	Cacna2d2	calcium channel, voltage-dependent, alpha 2/delta subunit 2	52.6071	16.8137	3.00933	1.58944	0.0402413	0.451054
ENSMUSG00000073489	Ifi204	interferon activated gene 204	637.359	258.066	2.46408	1.30105	0.040439	0.451568
ENSMUSG00000030782	Tgfb1i1	transforming growth factor beta 1 induced transcript 1	587.229	72.6645	7.98524	2.99734	0.0404396	0.451568
ENSMUSG00000026335	Pam	peptidylglycine alpha-amidating monooxygenase	3690.61	2144.8	1.72039	0.782734	0.0408696	0.451926
ENSMUSG00000026394	Atp6v1g3	ATPase, H+ transporting, lysosomal V1 subunit G3	915.569	548.392	1.66833	0.738407	0.0405324	0.451926
ENSMUSG00000058248	Kcnh1	potassium voltage-gated channel, subfamily H (eag-related), member 1	28.6813	7.71939	3.40406	1.76726	0.0407657	0.451926
ENSMUSG00000021950	Anxa8	annexin A8	9.85857	0	10.8586	3.44076	0.0407508	0.451926
ENSMUSG00000024074	Crim1	cysteine rich transmembrane BMP regulator 1 (chordin like)	4993.5	1685.64	2.96122	1.56619	0.0406479	0.451926
ENSMUSG00000087006	Gm13889	predicted gene 13889	244.694	6.46427	32.9161	5.04072	0.0409303	0.451926
ENSMUSG00000030048	Gkn3	gastrokine 3	13.192	1.55452	5.55564	2.47395	0.0407838	0.451926
ENSMUSG00000021217	Tshz3	teashirt zinc finger family member 3	238.022	104.077	2.27473	1.18569	0.0408565	0.451926
ENSMUSG00000070427	Il18bp	interleukin 18 binding protein	278.929	81.598	3.38906	1.76088	0.040587	0.451926
ENSMUSG00000003847	Nfat5	nuclear factor of activated T cells 5	7390.39	4187.98	1.76449	0.819248	0.040702	0.451926
ENSMUSG00000022941	Ripply3	ripply transcriptional repressor 3	82.5818	32.6236	2.48581	1.31372	0.0410074	0.452025
ENSMUSG00000057193	Slc44a2	solute carrier family 44, member 2	806.538	446.908	1.80291	0.850327	0.0410916	0.45237
ENSMUSG00000000058	Cav2	caveolin 2	563.709	247.921	2.26862	1.18182	0.0411555	0.452688
ENSMUSG00000035165	Kcne3	potassium voltage-gated channel, Isk-related subfamily, gene 3	72.0345	16.2025	4.24558	2.08596	0.0412346	0.453317
ENSMUSG00000042312	S100a13	S100 calcium binding protein A13	374.594	204.85	1.8246	0.86758	0.0412892	0.45341
ENSMUSG00000019789	Hey2	hairy/enhancer-of-split related with YRPW motif 2	457.104	25.8034	17.0913	4.09519	0.0414077	0.453787
ENSMUSG00000003476	Crhr2	corticotropin releasing hormone receptor 2	52.5876	6.5178	7.1281	2.83352	0.0413913	0.453787
ENSMUSG00000079243	Xirp1	xin actin-binding repeat containing 1	562.241	15.1248	34.93	5.1264	0.0414097	0.453787
ENSMUSG00000022061	Nkx3-1	NK-3 transcription factor, locus 1 (Drosophila)	1213.91	15.9539	71.6594	6.16308	0.0414534	0.454025
ENSMUSG00000041598	Cdc42ep4	CDC42 effector protein (Rho GTPase binding) 4	979.043	431.802	2.26442	1.17914	0.0415139	0.454204
ENSMUSG00000090053	Palm2	paralemmin 2	26.1072	1.70438	10.0234	3.3253	0.0415059	0.454204
ENSMUSG00000073758	Sh3d21	SH3 domain containing 21	227.095	121.988	1.85461	0.891118	0.0415624	0.454493
ENSMUSG00000020407	Upp1	uridine phosphorylase 1	504.744	161.108	3.1198	1.64145	0.0419172	0.4552
ENSMUSG00000021390	Ogn	osteoglycin	712.957	65.304	10.7679	3.42867	0.0417905	0.4552
ENSMUSG00000024211	Grm8	glutamate receptor, metabotropic 8	24.3826	1.28221	11.1219	3.47533	0.0418846	0.4552
ENSMUSG00000038239	Hrc	histidine rich calcium binding protein	280.075	10.065	25.402	4.66687	0.0417781	0.4552
ENSMUSG00000042246	Tmc7	transmembrane channel-like gene family 7	53.3792	18.3723	2.80705	1.48906	0.0417843	0.4552
ENSMUSG00000085197	1700125H03Rik	RIKEN cDNA 1700125H03 gene	25.1291	4.55666	4.7023	2.23337	0.0416857	0.4552
ENSMUSG00000034656	Cacna1a	calcium channel, voltage-dependent, P/Q type, alpha 1A subunit	397.097	129.459	3.05151	1.60952	0.0419659	0.4552
ENSMUSG00000032289	Thsd4	thrombospondin, type I, domain containing 4	1524.72	209.688	7.24161	2.85631	0.0419807	0.4552
ENSMUSG00000067586	S1pr3	sphingosine-1-phosphate receptor 3	1965.72	50.4346	38.2372	5.25691	0.0420454	0.455661
ENSMUSG00000037577	Ephx3	epoxide hydrolase 3	37.6132	3.84631	7.96753	2.99413	0.042184	0.455974
ENSMUSG00000067203	H2-K2	histocompatibility 2, K region locus 2	124.371	53.0936	2.31767	1.21268	0.0422514	0.455974
ENSMUSG00000092560	Gm8750	predicted pseudogene 8750	15.367	0.982817	8.25443	3.04517	0.0422116	0.455974
ENSMUSG00000073002	Vamp5	vesicle-associated membrane protein 5	181.631	83.4045	2.16376	1.11354	0.0421886	0.455974
ENSMUSG00000033955	Tnks1bp1	tankyrase 1 binding protein 1	2366.79	1096.22	2.15798	1.10968	0.042326	0.456062
ENSMUSG00000039813	Tbc1d2	TBC1 domain family, member 2	207.925	108.68	1.90486	0.929688	0.0423059	0.456062
ENSMUSG00000001911	Nfix	nuclear factor I/X	1793.86	920.505	1.94775	0.96181	0.0422841	0.456062
ENSMUSG00000022297	Fzd6	frizzled class receptor 6	518.94	301.444	1.71913	0.781678	0.0423681	0.456276
ENSMUSG00000018381	Abi3	ABI gene family, member 3	191.264	88.3952	2.15072	1.10482	0.0424684	0.457066
ENSMUSG00000003573	Homer3	homer scaffolding protein 3	186.586	91.3345	2.03159	1.02261	0.0426143	0.45799
ENSMUSG00000025887	Casp12	caspase 12	239.418	24.1836	9.5466	3.25499	0.0426161	0.45799
ENSMUSG00000060843	Ctnna3	catenin (cadherin associated protein), alpha 3	501.287	15.7383	30.0082	4.90729	0.0426494	0.458109
ENSMUSG00000050315	Synpo2	synaptopodin 2	1564.16	40.8593	37.391	5.22462	0.0426881	0.458285
ENSMUSG00000026452	Syt2	synaptotagmin II	54.5697	12.683	4.06122	2.02191	0.0427955	0.458558
ENSMUSG00000020542	Myocd	myocardin	517.922	14.5904	33.2846	5.05678	0.0427928	0.458558
ENSMUSG00000024981	Acsl5	acyl-CoA synthetase long-chain family member 5	1394.83	836.999	1.66567	0.736103	0.0429943	0.459416
ENSMUSG00000049904	Tmem17	transmembrane protein 17	51.32	18.6294	2.66538	1.41434	0.0431946	0.459699
ENSMUSG00000089854	Gm16133	predicted gene 16133	34.1639	4.61019	6.26787	2.64798	0.0432444	0.459699
ENSMUSG00000027006	Dnajc10	DnaJ heat shock protein family (Hsp40) member C10	1479.93	810.039	1.82597	0.868664	0.0431512	0.459699
ENSMUSG00000079110	Capn3	calpain 3	41.5837	13.585	2.91969	1.54581	0.0432695	0.459699
ENSMUSG00000028949	Smarcd3	SWI/SNF related, matrix associated, actin dependent regulator of chromatin, subfamily d, member 3	251.432	88.9068	2.80771	1.4894	0.0432233	0.459699
ENSMUSG00000031098	Syt8	synaptotagmin VIII	11.8792	0.790806	7.19185	2.84636	0.0430672	0.459699
ENSMUSG00000092622	Khdc3	KH domain containing 3, subcortical maternal complex member	10.1546	0.518172	7.34739	2.87723	0.0431756	0.459699
ENSMUSG00000052920	Prkg1	protein kinase, cGMP-dependent, type I	614.578	52.6576	11.4723	3.52008	0.0433995	0.460266
ENSMUSG00000029334	Prkg2	protein kinase, cGMP-dependent, type II	802.18	17.1703	44.203	5.46607	0.0434091	0.460266
ENSMUSG00000058624	Gda	guanine deaminase	520.89	288.525	1.80258	0.85006	0.0436158	0.461595
ENSMUSG00000055446	A630091E08Rik	RIKEN cDNA A630091E08 gene	27.716	6.2184	3.97817	1.9921	0.0436777	0.461925
ENSMUSG00000042807	Hecw2	HECT, C2 and WW domain containing E3 ubiquitin protein ligase 2	1201.31	634.902	1.89072	0.918936	0.0439129	0.462
ENSMUSG00000052062	Pard3b	par-3 family cell polarity regulator beta	835.612	498.013	1.67653	0.745481	0.0439172	0.462
ENSMUSG00000020806	Rhbdf2	rhomboid 5 homolog 2	601.238	330.635	1.81597	0.860737	0.0439541	0.462
ENSMUSG00000067629	Syngap1	synaptic Ras GTPase activating protein 1 homolog (rat)	161.077	76.8055	2.08311	1.05874	0.0438107	0.462
ENSMUSG00000081512	Gm15821	predicted gene 15821	14.9166	0.982817	8.02725	3.00491	0.0438703	0.462
ENSMUSG00000024736	Tmem132a	transmembrane protein 132A	270.21	143.651	1.87493	0.906835	0.0439765	0.462
ENSMUSG00000067279	Ppp1r3c	protein phosphatase 1, regulatory (inhibitor) subunit 3C	77.6781	12.2073	5.95717	2.57463	0.0437827	0.462
ENSMUSG00000002602	Axl	AXL receptor tyrosine kinase	2565.47	1310.1	1.95749	0.969007	0.0437413	0.462
ENSMUSG00000029765	Plxna4	plexin A4	789.293	423.994	1.85954	0.894943	0.0441154	0.462302
ENSMUSG00000042254	Cilp	cartilage intermediate layer protein, nucleotide pyrophosphohydrolase	22.1947	4.88266	3.9429	1.97926	0.0440967	0.462302
ENSMUSG00000069763	Tmem100	transmembrane protein 100	16.7056	2.07302	5.76162	2.52647	0.0442646	0.463137
ENSMUSG00000022358	Fbxo32	F-box protein 32	445.431	147.565	3.00496	1.58734	0.0444423	0.46363
ENSMUSG00000024526	Cidea	cell death-inducing DNA fragmentation factor, alpha subunit-like effector A	11.5832	0	12.5832	3.65342	0.0444029	0.46363
ENSMUSG00000027200	Sema6d	sema domain, transmembrane domain (TM), and cytoplasmic domain, (semaphorin) 6D	867.054	468.599	1.8485	0.886356	0.044505	0.46363
ENSMUSG00000029361	Nos1	nitric oxide synthase 1, neuronal	295.313	80.5836	3.63202	1.86077	0.0444467	0.46363
ENSMUSG00000072244	Trim6	tripartite motif-containing 6	36.7959	12.0031	2.90669	1.53938	0.0445144	0.46363
ENSMUSG00000030921	Trim30a	tripartite motif-containing 30A	1219.14	453.592	2.68404	1.42441	0.044478	0.46363
ENSMUSG00000038415	Foxq1	forkhead box Q1	120.401	63.9591	1.86888	0.902177	0.044658	0.46442
ENSMUSG00000040728	Esrp1	epithelial splicing regulatory protein 1	263.144	144.761	1.81218	0.857723	0.0447911	0.464866
ENSMUSG00000030554	Synm	synemin, intermediate filament protein	1236.78	77.9131	15.6854	3.97135	0.0447867	0.464866
ENSMUSG00000038872	Zfhx3	zinc finger homeobox 3	6862.6	2005.63	3.42046	1.77419	0.0447411	0.464866
ENSMUSG00000032128	Robo3	roundabout guidance receptor 3	170.827	79.7999	2.12657	1.08853	0.0447757	0.464866
ENSMUSG00000053647	Gper1	G protein-coupled estrogen receptor 1	71.938	23.1588	3.0191	1.59412	0.0448899	0.465231
ENSMUSG00000017167	Cntnap1	contactin associated protein-like 1	112.692	41.7336	2.66047	1.41168	0.0450595	0.46671
ENSMUSG00000018378	Cuedc1	CUE domain containing 1	635.094	350.885	1.80767	0.854134	0.0450824	0.466712
ENSMUSG00000026074	Map4k4	mitogen-activated protein kinase kinase kinase kinase 4	3082.23	1504.57	2.04788	1.03413	0.0452453	0.467801
ENSMUSG00000085708	Gm16063	predicted gene 16063	8.07606	0	9.07606	3.18207	0.0452557	0.467801
ENSMUSG00000030946	Lhpp	phospholysine phosphohistidine inorganic pyrophosphate phosphatase	65.5287	20.4601	3.10011	1.63232	0.0452137	0.467801
ENSMUSG00000028541	B4galt2	UDP-Gal:betaGlcNAc beta 1,4- galactosyltransferase, polypeptide 2	64.1966	22.4801	2.77668	1.47336	0.0453704	0.468517
ENSMUSG00000024937	Ehbp1l1	EH domain binding protein 1-like 1	1535.83	607.49	2.52564	1.33665	0.0455191	0.469816
ENSMUSG00000006574	Slc4a1	solute carrier family 4 (anion exchanger), member 1	642.218	317.516	2.01942	1.01394	0.0455575	0.469891
ENSMUSG00000021702	Thbs4	thrombospondin 4	23.9707	1.82715	8.83248	3.14282	0.0455719	0.469891
ENSMUSG00000023909	Paqr4	progestin and adipoQ receptor family member IV	85.3232	37.1966	2.25997	1.1763	0.0457098	0.470606
ENSMUSG00000022883	Robo1	roundabout guidance receptor 1	99.4996	31.7214	3.07137	1.61888	0.045788	0.470705
ENSMUSG00000068747	Sort1	sortilin 1	2025.04	961.581	2.1048	1.07368	0.0457752	0.470705
ENSMUSG00000022371	Col14a1	collagen, type XIV, alpha 1	1252.33	428.13	2.92062	1.54628	0.0458376	0.470744
ENSMUSG00000085282	Gm15663	predicted gene 15663	20.2706	4.11878	4.1554	2.05499	0.0459258	0.471179
ENSMUSG00000070565	Rasal2	RAS protein activator like 2	1576.13	877.691	1.79486	0.843869	0.0459609	0.471305
ENSMUSG00000030584	Dpf1	D4, zinc and double PHD fingers family 1	17.8767	2.26486	5.78178	2.53151	0.0460212	0.471689
ENSMUSG00000039835	Nhsl1	NHS-like 1	964.688	574.513	1.67796	0.746708	0.0462047	0.472551
ENSMUSG00000022817	Itgb5	integrin beta 5	2418.24	1390.79	1.73821	0.797606	0.0461556	0.472551
ENSMUSG00000036036	Zfp57	zinc finger protein 57	69.705	24.6055	2.76133	1.46536	0.0462201	0.472551
ENSMUSG00000079588	Tmem182	transmembrane protein 182	125.336	2.95983	31.9045	4.99569	0.046301	0.472635
ENSMUSG00000041439	Mfsd6	major facilitator superfamily domain containing 6	879.074	464.892	1.88901	0.917628	0.0462551	0.472635
ENSMUSG00000021959	Lats2	large tumor suppressor 2	2582.45	1468.53	1.75801	0.813943	0.0462775	0.472635
ENSMUSG00000030465	Psd3	pleckstrin and Sec7 domain containing 3	940.954	499.573	1.88175	0.912077	0.0463201	0.472635
ENSMUSG00000049225	Pdp1	pyruvate dehyrogenase phosphatase catalytic subunit 1	145.189	73.9396	1.95076	0.964034	0.0464892	0.473656
ENSMUSG00000031026	Trim66	tripartite motif-containing 66	11.3901	1.03634	6.08451	2.60514	0.0466096	0.474648
ENSMUSG00000021843	Ktn1	kinectin 1	3126.59	1725.77	1.81123	0.856974	0.0468051	0.475932
ENSMUSG00000033059	Pygb	brain glycogen phosphorylase	1467.17	740.46	1.9801	0.985575	0.0468	0.475932
ENSMUSG00000042156	Dzip1	DAZ interacting protein 1	181.386	85.9766	2.09696	1.0683	0.0468628	0.476284
ENSMUSG00000068015	Lrch1	leucine-rich repeats and calponin homology (CH) domain containing 1	1335.7	625.265	2.1344	1.09383	0.0469346	0.476309
ENSMUSG00000046714	Foxc2	forkhead box C2	148.496	31.4335	4.60932	2.20455	0.04691	0.476309
ENSMUSG00000030341	Tnfrsf1a	tumor necrosis factor receptor superfamily, member 1a	1157.52	663.274	1.74403	0.802427	0.0470005	0.476742
ENSMUSG00000026295	Spp2	secreted phosphoprotein 2	957.179	446.323	2.14203	1.09898	0.047083	0.476874
ENSMUSG00000021091	Serpina3n	serine (or cysteine) peptidase inhibitor, clade A, member 3N	140.26	34.8692	3.93819	1.97753	0.0470692	0.476874
ENSMUSG00000026536	Ifi211	interferon activated gene 211	259.914	57.3507	4.47147	2.16075	0.0471168	0.476982
ENSMUSG00000029392	Rilpl1	Rab interacting lysosomal protein-like 1	487.292	268.126	1.81436	0.85946	0.0471767	0.477052
ENSMUSG00000004951	Hspb1	heat shock protein 1	800.617	169.21	4.70957	2.2356	0.0472163	0.477052
ENSMUSG00000041741	Pde3a	phosphodiesterase 3A, cGMP inhibited	2364.47	107.662	21.7691	4.44421	0.0471923	0.477052
ENSMUSG00000005611	Mrvi1	MRV integration site 1	1654.98	73.6585	22.1808	4.47124	0.0472827	0.477254
ENSMUSG00000046491	C1qtnf2	C1q and tumor necrosis factor related protein 2	58.1347	4.40713	10.9364	3.45107	0.0473897	0.477679
ENSMUSG00000093278	Mir5110	microRNA 5110	7.88303	0	8.88303	3.15105	0.0475496	0.477679
ENSMUSG00000021508	Cxcl14	chemokine (C-X-C motif) ligand 14	107.917	47.6885	2.23702	1.16158	0.0475396	0.477679
ENSMUSG00000050147	F2rl3	coagulation factor II (thrombin) receptor-like 3	29.7624	7.33953	3.68875	1.88313	0.0474633	0.477679
ENSMUSG00000020486	Sept4	septin 4	423.018	234.856	1.79778	0.846218	0.0475921	0.477801
ENSMUSG00000031596	Slc7a2	solute carrier family 7 (cationic amino acid transporter, y+ system), member 2	792.321	77.8854	10.0566	3.33007	0.0476751	0.478167
ENSMUSG00000029759	Pon3	paraoxonase 3	247.765	128.666	1.91851	0.939984	0.0477956	0.478677
ENSMUSG00000063838	Cdc42ep5	CDC42 effector protein (Rho GTPase binding) 5	91.4235	33.0088	2.71764	1.44235	0.0478874	0.47913
ENSMUSG00000045689	Pcdhb4	protocadherin beta 4	33.6621	11.2929	2.81968	1.49553	0.0479437	0.47946
ENSMUSG00000037111	Setd7	SET domain containing (lysine methyltransferase) 7	1800.9	853.269	2.10928	1.07675	0.0480259	0.479463
ENSMUSG00000045318	Adra2c	adrenergic receptor, alpha 2c	24.5821	5.91917	3.69728	1.88647	0.0479962	0.479463
ENSMUSG00000000753	Serpinf1	serine (or cysteine) peptidase inhibitor, clade F, member 1	248.055	92.9082	2.65211	1.40714	0.0481645	0.479859
ENSMUSG00000043336	Filip1l	filamin A interacting protein 1-like	3602.58	888.544	4.05104	2.01829	0.0482041	0.479859
ENSMUSG00000039410	Prdm16	PR domain containing 16	1270.32	647.172	1.9614	0.97188	0.0481219	0.479859
ENSMUSG00000030681	Mvp	major vault protein	1331.4	731.978	1.81779	0.862184	0.0481975	0.479859
ENSMUSG00000037405	Icam1	intercellular adhesion molecule 1	1979.34	830.649	2.38122	1.2517	0.0482166	0.479859
ENSMUSG00000025784	Clec3b	C-type lectin domain family 3, member b	59.3897	23.7849	2.43655	1.28484	0.0482751	0.479977
ENSMUSG00000020804	Aanat	arylalkylamine N-acetyltransferase	48.6365	18.1261	2.59522	1.37586	0.0483573	0.48033
ENSMUSG00000018398	Sept8	septin 8	1004.34	486.612	2.06176	1.04388	0.048625	0.481948
ENSMUSG00000021608	Lpcat1	lysophosphatidylcholine acyltransferase 1	473.991	243.622	1.94173	0.957346	0.0486371	0.481948
ENSMUSG00000042104	Uggt2	UDP-glucose glycoprotein glucosyltransferase 2	196.29	94.2958	2.07029	1.04983	0.0486616	0.481958
ENSMUSG00000078302	Foxd1	forkhead box D1	18.6039	2.5375	5.54174	2.47034	0.0487621	0.482722
ENSMUSG00000036053	Fmnl2	formin-like 2	935.917	506.334	1.84675	0.884986	0.0488952	0.482884
ENSMUSG00000073805	Fam196a	family with sequence similarity 196, member A	201.85	101.819	1.97289	0.980307	0.0489149	0.482884
ENSMUSG00000032733	Snx33	sorting nexin 33	557.577	308.536	1.80456	0.85165	0.0489427	0.482884
ENSMUSG00000020963	Tshr	thyroid stimulating hormone receptor	77.9292	38.8657	1.97988	0.98541	0.049201	0.484736
ENSMUSG00000030806	Stx1b	syntaxin 1B	42.3237	14.0226	2.88391	1.52802	0.049278	0.48503
ENSMUSG00000046546	Fam43a	family with sequence similarity 43, member A	968.098	470.042	2.05735	1.04079	0.0493052	0.485066
ENSMUSG00000040328	Olfr56	olfactory receptor 56	20.9527	0.982817	11.0715	3.46877	0.0495856	0.486445
ENSMUSG00000035107	Dcbld2	discoidin, CUB and LCCL domain containing 2	738.454	372.345	1.98062	0.98595	0.0496175	0.486445
ENSMUSG00000028778	Hcrtr1	hypocretin (orexin) receptor 1	14.524	2.07269	5.05226	2.33693	0.0496816	0.486445
ENSMUSG00000070304	Scn2b	sodium channel, voltage-gated, type II, beta	83.2638	15.6422	5.06327	2.34007	0.0496701	0.486445
ENSMUSG00000041794	Myrip	myosin VIIA and Rab interacting protein	279.419	101.247	2.74256	1.45552	0.0495504	0.486445
ENSMUSG00000038145	Snrk	SNF related kinase	2498.35	1393.56	1.79221	0.841739	0.0496124	0.486445
ENSMUSG00000037833	Sh2d4b	SH2 domain containing 4B	153.349	55.8242	2.71625	1.44161	0.0498124	0.486697
ENSMUSG00000028883	Sema3a	sema domain, immunoglobulin domain (Ig), short basic domain, secreted, (semaphorin) 3A	15.1547	1.77346	5.82475	2.5422	0.0498222	0.486697
ENSMUSG00000022840	Adcy5	adenylate cyclase 5	1229.97	77.0027	15.7812	3.98013	0.0501658	0.489152
ENSMUSG00000056900	Usp13	ubiquitin specific peptidase 13 (isopeptidase T-3)	24.8716	0.763876	14.6675	3.87455	0.0501718	0.489152
ENSMUSG00000051483	Cbr1	carbonyl reductase 1	1475.1	363.054	4.05463	2.01957	0.0503219	0.489687
ENSMUSG00000031636	Pdlim3	PDZ and LIM domain 3	754.56	42.3593	17.4256	4.12313	0.0504343	0.48969
ENSMUSG00000025931	Paqr8	progestin and adipoQ receptor family member VIII	61.8671	23.8305	2.53185	1.34019	0.0506393	0.490003
ENSMUSG00000020953	Coch	cochlin	23.1728	3.91572	4.91746	2.29791	0.0506875	0.490003
ENSMUSG00000029223	Uchl1	ubiquitin carboxy-terminal hydrolase L1	83.3153	38.1366	2.15439	1.10728	0.0505749	0.490003
ENSMUSG00000070509	Rgma	repulsive guidance molecule family member A	231.168	83.0809	2.76125	1.46532	0.0506101	0.490003
ENSMUSG00000021125	Arg2	arginase type II	81.9384	35.8833	2.24867	1.16907	0.0507541	0.490416
ENSMUSG00000032715	Trib3	tribbles pseudokinase 3	28.2694	7.78846	3.33044	1.73571	0.0508005	0.490634
ENSMUSG00000049122	Frmd3	FERM domain containing 3	29.048	4.66355	5.30551	2.40749	0.0508658	0.490805
ENSMUSG00000028718	Stil	Scl/Tal1 interrupting locus	18.546	2.26503	5.98646	2.5817	0.0509373	0.491265
ENSMUSG00000059866	Tnip2	TNFAIP3 interacting protein 2	655.963	362.189	1.80887	0.855089	0.0509999	0.491638
ENSMUSG00000048520	Fbxl13	F-box and leucine-rich repeat protein 13	9.78136	0.395403	7.72634	2.94978	0.0511186	0.492321
ENSMUSG00000001089	Luzp1	leucine zipper protein 1	3411.49	1691.75	2.01595	1.01146	0.0512548	0.492711
ENSMUSG00000066842	Hmcn1	hemicentin 1	53.8941	22.3255	2.35339	1.23474	0.051308	0.492763
ENSMUSG00000029718	Pcolce	procollagen C-endopeptidase enhancer protein	1066.33	653.345	1.63114	0.705884	0.0512891	0.492763
ENSMUSG00000022475	Hdac7	histone deacetylase 7	1335.36	635.17	2.10062	1.07082	0.0513489	0.492925
ENSMUSG00000028111	Ctsk	cathepsin K	62.3434	25.8997	2.3548	1.2356	0.0514581	0.493513
ENSMUSG00000053581	Zfand2a	zinc finger, AN1-type domain 2A	571.663	332.538	1.71693	0.779835	0.0515489	0.494154
ENSMUSG00000025150	Cbr2	carbonyl reductase 2	68.5918	29.2548	2.30019	1.20175	0.0518145	0.494857
ENSMUSG00000034997	Htr2a	5-hydroxytryptamine (serotonin) receptor 2A	60.2518	9.69607	5.72657	2.51767	0.0517657	0.494857
ENSMUSG00000028402	Mpdz	multiple PDZ domain protein	1159.75	571.959	2.02589	1.01856	0.0517047	0.494857
ENSMUSG00000000320	Alox12	arachidonate 12-lipoxygenase	343.358	87.8319	3.87651	1.95476	0.0519459	0.495383
ENSMUSG00000039270	Megf9	multiple EGF-like-domains 9	834.389	444.79	1.87395	0.906085	0.0519658	0.495383
ENSMUSG00000071713	Csf2rb	colony stimulating factor 2 receptor, beta, low-affinity (granulocyte-macrophage)	685.339	385.715	1.77479	0.82765	0.051993	0.495413
ENSMUSG00000045312	Lhfpl2	lipoma HMGIC fusion partner-like 2	172.197	97.1709	1.76424	0.819048	0.0522862	0.496389
ENSMUSG00000050505	Pcdh20	protocadherin 20	11.0555	1.03634	5.92017	2.56564	0.0522481	0.496389
ENSMUSG00000039103	Nexn	nexilin	1394.46	88.1296	15.6565	3.96869	0.0523041	0.496389
ENSMUSG00000051950	B3glct	beta-3-glucosyltransferase	253.633	133.774	1.88933	0.917875	0.0522359	0.496389
ENSMUSG00000031024	St5	suppression of tumorigenicity 5	1147.98	608.312	1.88571	0.915105	0.0523365	0.496389
ENSMUSG00000039092	Sptlc3	serine palmitoyltransferase, long chain base subunit 3	15.4893	2.86349	4.26798	2.09355	0.0523715	0.496492
ENSMUSG00000026421	Csrp1	cysteine and glycine-rich protein 1	3432.62	573.297	5.97882	2.57986	0.0527788	0.497452
ENSMUSG00000034993	Vat1	vesicle amine transport 1	953.117	555.129	1.71564	0.778747	0.0527654	0.497452
ENSMUSG00000010830	Kdelr3	KDEL (Lys-Asp-Glu-Leu) endoplasmic reticulum protein retention receptor 3	72.9226	29.8459	2.39652	1.26094	0.0527316	0.497452
ENSMUSG00000025743	Sdc3	syndecan 3	1960.73	1075.47	1.82238	0.86582	0.0527098	0.497452
ENSMUSG00000041361	Myzap	myocardial zonula adherens protein	61.6483	24.3559	2.47076	1.30495	0.0530637	0.499148
ENSMUSG00000020566	Atp6v1c2	ATPase, H+ transporting, lysosomal V1 subunit C2	334.581	202.499	1.64905	0.721639	0.0532461	0.500446
ENSMUSG00000031075	Ano1	anoctamin 1, calcium activated chloride channel	697.095	46.0964	14.8227	3.88973	0.0532503	0.500446
ENSMUSG00000045039	Megf8	multiple EGF-like-domains 8	1220.82	736.926	1.65575	0.727488	0.0533396	0.501057
ENSMUSG00000006301	Tmbim1	transmembrane BAX inhibitor motif containing 1	1274.2	536.445	2.37271	1.24654	0.0533988	0.501072
ENSMUSG00000021536	Adcy2	adenylate cyclase 2	35.9851	3.10903	9.00092	3.17007	0.0537879	0.501808
ENSMUSG00000040752	Myh6	myosin, heavy polypeptide 6, cardiac muscle, alpha	558.187	18.9069	28.0901	4.81199	0.0539731	0.501808
ENSMUSG00000024897	Apba1	amyloid beta (A4) precursor protein binding, family A, member 1	698.324	131.289	5.28633	2.40227	0.0537665	0.501808
ENSMUSG00000075520	Malrd1	MAM and LDL receptor class A domain containing 1	52.4462	22.4062	2.28342	1.1912	0.053758	0.501808
ENSMUSG00000061171	Slc38a11	solute carrier family 38, member 11	126.572	5.87702	18.5505	4.21338	0.0540367	0.501808
ENSMUSG00000027276	Jag1	jagged 1	3364.46	830.841	4.04579	2.01642	0.0540499	0.501808
ENSMUSG00000027834	Serpini1	serine (or cysteine) peptidase inhibitor, clade I, member 1	503.495	39.9317	12.3253	3.62355	0.0540624	0.501808
ENSMUSG00000056737	Capg	capping protein (actin filament), gelsolin-like	326.756	178.058	1.83045	0.872195	0.0540243	0.501808
ENSMUSG00000064724	Gm25852	predicted gene, 25852	77.9483	4.82913	13.5438	3.75956	0.0538255	0.501808
ENSMUSG00000036986	Pml	promyelocytic leukemia	1226.83	686.113	1.78695	0.837495	0.0537284	0.501808
ENSMUSG00000001313	Rnd2	Rho family GTPase 2	108.599	46.8682	2.28959	1.19509	0.0541033	0.501811
ENSMUSG00000025104	Hdgfl3	HDGF like 3	453.907	254.439	1.78088	0.832591	0.0541266	0.501811
ENSMUSG00000026509	Capn2	calpain 2	2497.85	1495.44	1.66987	0.739734	0.0544716	0.503698
ENSMUSG00000060802	B2m	beta-2 microglobulin	14378.3	5174.82	2.77818	1.47414	0.0545015	0.503698
ENSMUSG00000038011	Dnah10	dynein, axonemal, heavy chain 10	35.8822	11.8116	2.87882	1.52548	0.0544779	0.503698
ENSMUSG00000046731	Kctd11	potassium channel tetramerisation domain containing 11	166.579	90.6452	1.82857	0.870712	0.0545459	0.503882
ENSMUSG00000050234	Gja4	gap junction protein, alpha 4	614.237	96.0252	6.341	2.66471	0.0546509	0.5044
ENSMUSG00000056602	Fry	FRY microtubule binding protein	3351.1	577.93	5.79017	2.53361	0.0546276	0.5044
ENSMUSG00000000690	Hoxb6	homeobox B6	683.203	414.805	1.64549	0.718516	0.0548161	0.505246
ENSMUSG00000017390	Aldoc	aldolase C, fructose-bisphosphate	189.546	110.698	1.70591	0.770539	0.0548594	0.505394
ENSMUSG00000063130	Calml3	calmodulin-like 3	43.2632	15.492	2.68393	1.42434	0.0549657	0.505394
ENSMUSG00000022565	Plec	plectin	17793.8	6882.29	2.58521	1.37028	0.0550252	0.505394
ENSMUSG00000023828	Slc22a3	solute carrier family 22 (organic cation transporter), member 3	247.359	8.29159	26.7294	4.74036	0.0550928	0.505394
ENSMUSG00000024302	Dtna	dystrobrevin alpha	243.749	95.4988	2.53629	1.34272	0.0550622	0.505394
ENSMUSG00000024901	Peli3	pellino 3	36.5385	9.08672	3.72158	1.89591	0.0550883	0.505394
ENSMUSG00000024659	Anxa1	annexin A1	938.38	335.797	2.78916	1.47983	0.0551022	0.505394
ENSMUSG00000027500	Stmn2	stathmin-like 2	226.367	39.2263	5.65221	2.49881	0.0549775	0.505394
ENSMUSG00000087543	Gm16576	predicted gene 16576	122.795	55.3011	2.1988	1.13671	0.0552098	0.506156
ENSMUSG00000091507	Gm17194	predicted gene 17194	12.8573	0.395403	9.93069	3.31189	0.0553252	0.506171
ENSMUSG00000007039	Ddah2	dimethylarginine dimethylaminohydrolase 2	321.961	148.049	2.16682	1.11558	0.055291	0.506171
ENSMUSG00000088659	Gm24845	predicted gene, 24845	7.52909	0	8.52909	3.09239	0.0552651	0.506171
ENSMUSG00000027456	Sdcbp2	syndecan binding protein (syntenin) 2	26.8344	5.53931	4.25647	2.08966	0.0553344	0.506171
ENSMUSG00000039953	Clstn1	calsyntenin 1	2885.25	1822.42	1.58288	0.66255	0.0552907	0.506171
ENSMUSG00000021838	Samd4	sterile alpha motif domain containing 4	654.508	134.704	4.83042	2.27215	0.0554389	0.506227
ENSMUSG00000042155	Klhl23	kelch-like 23	115.504	15.8185	6.92712	2.79226	0.0554251	0.506227
ENSMUSG00000040212	Emp3	epithelial membrane protein 3	245.847	118.522	2.06528	1.04634	0.0554024	0.506227
ENSMUSG00000047419	Cmya5	cardiomyopathy associated 5	137.389	51.6964	2.62617	1.39296	0.0554983	0.506374
ENSMUSG00000038370	Pcp4l1	Purkinje cell protein 4-like 1	1884.8	88.1623	21.1502	4.4026	0.0555628	0.506685
ENSMUSG00000073590	3222401L13Rik	RIKEN cDNA 3222401L13 gene	65.1812	24.6339	2.58179	1.36837	0.0556811	0.507215
ENSMUSG00000078794	Dact3	dishevelled-binding antagonist of beta-catenin 3	195.331	14.3489	12.7912	3.67708	0.0556949	0.507215
ENSMUSG00000053617	Sh3pxd2a	SH3 and PX domains 2A	1646.97	699.298	2.35324	1.23465	0.0557319	0.507328
ENSMUSG00000043687	1190005I06Rik	RIKEN cDNA 1190005I06 gene	13.5266	1.52775	5.74684	2.52277	0.0557789	0.507531
ENSMUSG00000010751	Tnfrsf22	tumor necrosis factor receptor superfamily, member 22	55.3291	21.9609	2.45326	1.2947	0.0558739	0.507947
ENSMUSG00000045903	Npas4	neuronal PAS domain protein 4	33.4947	0.790806	19.2621	4.26769	0.0559401	0.5081
ENSMUSG00000028005	Gucy1b3	guanylate cyclase 1, soluble, beta 3	504.312	31.0388	15.7719	3.97928	0.0560954	0.508837
ENSMUSG00000026163	Sphkap	SPHK1 interactor, AKAP domain containing	20.8562	5.18172	3.53561	1.82196	0.0561596	0.50894
ENSMUSG00000037624	Kcnk2	potassium channel, subfamily K, member 2	17.703	2.86383	4.84053	2.27517	0.0561809	0.50894
ENSMUSG00000024049	Myom1	myomesin 1	2345.97	91.3094	25.425	4.66817	0.056138	0.50894
ENSMUSG00000041073	Nacad	NAC alpha domain containing	153.979	74.5543	2.05123	1.03649	0.0562705	0.509485
ENSMUSG00000001833	Sept7	septin 7	2733.63	1548.98	1.76429	0.819091	0.0562906	0.509485
ENSMUSG00000055523	Gucy2g	guanylate cyclase 2g	29.1446	1.67745	11.2587	3.49296	0.0565268	0.510703
ENSMUSG00000031661	Nkd1	naked cuticle 1 homolog (Drosophila)	181.302	26.905	6.53298	2.70774	0.0564907	0.510703
ENSMUSG00000085977	Gm5970	predicted gene 5970	199.063	26.4259	7.29469	2.86685	0.0566415	0.511313
ENSMUSG00000015143	Actn1	actinin, alpha 1	4215.33	634.366	6.63606	2.73033	0.0567599	0.511485
ENSMUSG00000055994	Nod2	nucleotide-binding oligomerization domain containing 2	347.837	119.687	2.89042	1.53128	0.0568375	0.511513
ENSMUSG00000032648	Pygm	muscle glycogen phosphorylase	383.609	36.1563	10.3511	3.37172	0.0570809	0.512806
ENSMUSG00000037016	Frem2	Fras1 related extracellular matrix protein 2	1058.79	224.986	4.68963	2.22948	0.0571507	0.51321
ENSMUSG00000056144	Trim34a	tripartite motif-containing 34A	240.924	117.102	2.04844	1.03452	0.0572414	0.5138
ENSMUSG00000053825	Ppfia2	protein tyrosine phosphatase, receptor type, f polypeptide (PTPRF), interacting protein (liprin), alpha 2	44.7434	12.1579	3.47648	1.79763	0.0573072	0.513925
ENSMUSG00000051316	Taf7	TATA-box binding protein associated factor 7	799.157	446.734	1.78712	0.83764	0.0573955	0.513925
ENSMUSG00000025089	Gfra1	glial cell line derived neurotrophic factor family receptor alpha 1	20.9592	4.63712	3.89546	1.96179	0.0574051	0.513925
ENSMUSG00000066113	Adamtsl1	ADAMTS-like 1	765.706	41.4069	18.0797	4.1763	0.0573359	0.513925
ENSMUSG00000024998	Plce1	phospholipase C, epsilon 1	818.808	85.0106	9.53148	3.2527	0.0575164	0.514474
ENSMUSG00000039883	Lrrc17	leucine rich repeat containing 17	45.4125	3.10937	11.2943	3.49753	0.0579264	0.517018
ENSMUSG00000038539	Atf5	activating transcription factor 5	126.289	70.1929	1.78795	0.838303	0.0580231	0.517657
ENSMUSG00000039323	Igfbp2	insulin-like growth factor binding protein 2	29.8138	7.25441	3.73301	1.90034	0.0581119	0.518001
ENSMUSG00000040631	Dok4	docking protein 4	242.642	127.501	1.89603	0.922985	0.0581908	0.518256
ENSMUSG00000050288	Fzd2	frizzled class receptor 2	88.5534	12.0954	6.83853	2.77369	0.0582666	0.518348
ENSMUSG00000001467	Cyp51	cytochrome P450, family 51	953.73	509.706	1.86943	0.902598	0.0582767	0.518348
ENSMUSG00000001025	S100a6	S100 calcium binding protein A6 (calcyclin)	577.107	271.174	2.12403	1.0868	0.0585899	0.520097
ENSMUSG00000090222	Ifi203-ps	interferon activated gene 203, pseudogene	312.418	61.3688	5.02523	2.32919	0.0586852	0.520184
ENSMUSG00000048856	Slc25a47	solute carrier family 25, member 47	44.4151	6.60258	5.97363	2.57861	0.0586425	0.520184
ENSMUSG00000037071	Scd1	stearoyl-Coenzyme A desaturase 1	2485.31	469.728	5.28183	2.40104	0.0588441	0.521143
ENSMUSG00000087366	Junos	jun proto-oncogene, opposite strand	90.0786	43.5764	2.0432	1.03083	0.0591279	0.522566
ENSMUSG00000063388	BC023105	cDNA sequence BC023105	240.563	12.2764	18.195	4.18547	0.0591595	0.522589
ENSMUSG00000021081	Serpina1f	serine (or cysteine) peptidase inhibitor, clade A, member 1F	855.923	124.869	6.80807	2.76725	0.0593916	0.52374
ENSMUSG00000067780	Pi15	peptidase inhibitor 15	391.865	17.5658	21.1607	4.40331	0.059448	0.524012
ENSMUSG00000040033	Stat2	signal transducer and activator of transcription 2	1476.92	465.436	3.16854	1.66382	0.059578	0.524204
ENSMUSG00000032878	Ccdc85a	coiled-coil domain containing 85A	126.373	46.6333	2.67403	1.41902	0.0595143	0.524204
ENSMUSG00000028717	Tal1	T cell acute lymphocytic leukemia 1	224.122	64.9384	3.41412	1.77152	0.0596487	0.524211
ENSMUSG00000020155	Kcnmb1	potassium large conductance calcium-activated channel, subfamily M, beta member 1	391.164	17.6812	20.9924	4.3918	0.059746	0.524395
ENSMUSG00000060166	Zdhhc8	zinc finger, DHHC domain containing 8	459.879	246.882	1.85927	0.894735	0.0597124	0.524395
ENSMUSG00000044022	Pcdhb21	protocadherin beta 21	29.505	11.1007	2.52092	1.33395	0.0597456	0.524395
ENSMUSG00000024968	Rcor2	REST corepressor 2	56.8091	24.0873	2.30432	1.20434	0.0598252	0.524634
ENSMUSG00000004085	Map3k20	mitogen-activated protein kinase kinase kinase 20	3749.76	431.171	8.67887	3.11751	0.0598497	0.524634
ENSMUSG00000033585	Ndn	necdin	34.6209	9.63149	3.35051	1.74438	0.0598423	0.524634
ENSMUSG00000057789	Bak1	BCL2-antagonist/killer 1	206.065	103.978	1.97246	0.979996	0.0599789	0.524841
ENSMUSG00000039252	Lgi2	leucine-rich repeat LGI family, member 2	15.0775	2.61796	4.4438	2.15179	0.0599708	0.524841
ENSMUSG00000042216	Sgsm1	small G protein signaling modulator 1	171.444	95.5957	1.78522	0.836099	0.0599412	0.524841
ENSMUSG00000029171	Pgm1	phosphoglucomutase 1	528.071	300.89	1.75253	0.80944	0.0602267	0.526147
ENSMUSG00000010358	Ifi35	interferon-induced protein 35	248.331	121.851	2.02954	1.02115	0.0603502	0.526514
ENSMUSG00000022216	Psme1	proteasome (prosome, macropain) activator subunit 1 (PA28 alpha)	1854.62	1052.33	1.76167	0.816947	0.0603366	0.526514
ENSMUSG00000062488	Ifit3b	interferon-induced protein with tetratricopeptide repeats 3B	762.932	84.4731	8.93769	3.1599	0.0603119	0.526514
ENSMUSG00000026547	Tagln2	transgelin 2	1801.12	1019.83	1.76535	0.819958	0.0605224	0.527387
ENSMUSG00000039601	Rcan2	regulator of calcineurin 2	1505.82	219.207	6.84274	2.77457	0.0606067	0.527899
ENSMUSG00000031877	Ces2g	carboxylesterase 2G	141.946	77.2606	1.82653	0.869108	0.0606382	0.52795
ENSMUSG00000028444	Cntfr	ciliary neurotrophic factor receptor	93.7339	52.3777	1.77478	0.827644	0.0607344	0.528117
ENSMUSG00000032875	Arhgef17	Rho guanine nucleotide exchange factor (GEF) 17	3098.19	818.631	3.7812	1.91884	0.0607324	0.528117
ENSMUSG00000068794	Col28a1	collagen, type XXVIII, alpha 1	10.9397	0.491408	8.00565	3.00102	0.0608251	0.528237
ENSMUSG00000040428	Plekha4	pleckstrin homology domain containing, family A (phosphoinositide binding specific) member 4	46.6352	17.9614	2.51222	1.32896	0.060815	0.528237
ENSMUSG00000002055	Spag5	sperm associated antigen 5	108.753	58.5553	1.84288	0.881965	0.0608514	0.528243
ENSMUSG00000017830	Dhx58	DEXH (Asp-Glu-X-His) box polypeptide 58	258.099	89.6272	2.85896	1.51549	0.0609551	0.528475
ENSMUSG00000025496	Drd4	dopamine receptor D4	9.40811	0.245704	8.35521	3.06268	0.0609865	0.528524
ENSMUSG00000009281	Rarres2	retinoic acid receptor responder (tazarotene induced) 2	300.539	171.99	1.7431	0.801659	0.0610653	0.528985
ENSMUSG00000093661	Eif4e3	eukaryotic translation initiation factor 4E member 3	308.653	161.921	1.90064	0.926482	0.0610955	0.529023
ENSMUSG00000034981	Parm1	prostate androgen-regulated mucin-like protein 1	1194.05	193.849	6.13319	2.61664	0.0611808	0.529317
ENSMUSG00000022548	Apod	apolipoprotein D	48.2377	10.0652	4.44977	2.15373	0.0613975	0.529412
ENSMUSG00000025069	Gsto2	glutathione S-transferase omega 2	32.6775	9.88858	3.09292	1.62897	0.0613255	0.529412
ENSMUSG00000027470	Mylk2	myosin, light polypeptide kinase 2, skeletal muscle	17.2074	0	18.2074	4.18646	0.0613771	0.529412
ENSMUSG00000033910	Gucy1a3	guanylate cyclase 1, soluble, alpha 3	1189.58	162.739	7.27121	2.8622	0.0613532	0.529412
ENSMUSG00000084939	Gm830	predicted gene 830	34.3763	1.03634	17.3724	4.11873	0.0613371	0.529412
ENSMUSG00000049107	Ntf3	neurotrophin 3	97.9229	11.3897	7.98426	2.99716	0.0614265	0.52944
ENSMUSG00000052539	Magi3	membrane associated guanylate kinase, WW and PDZ domain containing 3	1510.19	919.663	1.64141	0.714935	0.0616393	0.530957
ENSMUSG00000063568	Jazf1	JAZF zinc finger 1	91.8161	30.2463	2.97047	1.57069	0.061654	0.530957
ENSMUSG00000031551	Ido1	indoleamine 2,3-dioxygenase 1	39.4729	1.28221	17.734	4.14845	0.0618178	0.531701
ENSMUSG00000041329	Atp1b2	ATPase, Na+/K+ transporting, beta 2 polypeptide	1349.09	99.7441	13.4011	3.74428	0.0619574	0.532362
ENSMUSG00000025780	Itih5	inter-alpha (globulin) inhibitor H5	288.679	156.625	1.83778	0.877963	0.0620575	0.532362
ENSMUSG00000005640	Insrr	insulin receptor-related receptor	266.053	157.514	1.68473	0.752518	0.0620791	0.532362
ENSMUSG00000081755	Mup-ps23	major urinary protein, pseudogene 23	16.3451	0	17.3451	4.11646	0.0621569	0.532362
ENSMUSG00000086675	Plxna4os2	plexin A4, opposite strand 2	59.0744	21.1595	2.71099	1.43882	0.062205	0.532362
ENSMUSG00000041187	Prkd2	protein kinase D2	686.729	360.449	1.9027	0.928049	0.0620132	0.532362
ENSMUSG00000038244	Mical2	microtubule associated monooxygenase, calponin and LIM domain containing 2	739.921	164.542	4.47572	2.16212	0.0619795	0.532362
ENSMUSG00000026249	Serpine2	serine (or cysteine) peptidase inhibitor, clade E, member 2	1849.27	332.105	5.55462	2.47369	0.0624861	0.532875
ENSMUSG00000093046	Mir3081	microRNA 3081	7.29096	0	8.29096	3.05154	0.0623899	0.532875
ENSMUSG00000014773	Dll1	delta-like 1 (Drosophila)	264.11	135.963	1.93563	0.952803	0.0624978	0.532875
ENSMUSG00000027533	Fabp5	fatty acid binding protein 5, epidermal	97.3505	40.2844	2.38227	1.25234	0.0624972	0.532875
ENSMUSG00000086479	Gm16014	predicted gene 16014	21.2166	5.35868	3.4939	1.80484	0.0624119	0.532875
ENSMUSG00000038456	Dennd2a	DENN/MADD domain containing 2A	75.0012	36.2637	2.03955	1.02825	0.0624249	0.532875
ENSMUSG00000010064	Slc38a3	solute carrier family 38, member 3	157.455	41.1175	3.7622	1.91158	0.0623498	0.532875
ENSMUSG00000023460	Rab12	RAB12, member RAS oncogene family	1259.89	728.444	1.72857	0.789575	0.0625341	0.532963
ENSMUSG00000030159	Clec1b	C-type lectin domain family 1, member b	70.7476	32.3252	2.15295	1.10632	0.0625782	0.533119
ENSMUSG00000022994	Adcy6	adenylate cyclase 6	2884.31	1804.7	1.59789	0.676164	0.0627069	0.533332
ENSMUSG00000058325	Dock1	dedicator of cytokinesis 1	4993.54	3022.68	1.65181	0.724048	0.0626898	0.533332
ENSMUSG00000044864	Ankrd50	ankyrin repeat domain 50	975.826	545.092	1.78876	0.838959	0.0629079	0.534009
ENSMUSG00000070385	Ampd1	adenosine monophosphate deaminase 1	10.6437	0.790806	6.50191	2.70086	0.0628678	0.534009
ENSMUSG00000029207	Apbb2	amyloid beta (A4) precursor protein-binding, family B, member 2	2686.72	1550.57	1.73225	0.792648	0.0629324	0.534009
ENSMUSG00000032671	A930018P22Rik	RIKEN cDNA A930018P22 gene	7.25236	0	8.25236	3.04481	0.0630047	0.53432
ENSMUSG00000040152	Thbs1	thrombospondin 1	4801.7	1314.45	3.65099	1.86829	0.0630871	0.534524
ENSMUSG00000048096	Lmod1	leiomodin 1 (smooth muscle)	1942.83	88.5674	21.7024	4.43979	0.0631621	0.534774
ENSMUSG00000022906	Parp9	poly (ADP-ribose) polymerase family, member 9	930.58	332.132	2.79643	1.48359	0.0632404	0.534998
ENSMUSG00000043313	Pcdhb19	protocadherin beta 19	67.427	16.9781	3.80614	1.92833	0.0633425	0.535063
ENSMUSG00000026728	Vim	vimentin	9155.34	2170.9	4.21582	2.07581	0.0633423	0.535063
ENSMUSG00000025383	Il23a	interleukin 23, alpha subunit p19	15.0131	0.245704	12.8546	3.68422	0.0635553	0.535541
ENSMUSG00000021388	Aspn	asporin	111.404	7.91156	12.6133	3.65688	0.0635867	0.535541
ENSMUSG00000022620	Arsa	arylsulfatase A	323.184	187.865	1.71649	0.779459	0.0636423	0.535541
ENSMUSG00000000794	Kcnn3	potassium intermediate/small conductance calcium-activated channel, subfamily N, member 3	64.9945	10.9361	5.52896	2.46701	0.0636426	0.535541
ENSMUSG00000043165	Lor	loricrin	23.7777	6.3415	3.37502	1.7549	0.0636429	0.535541
ENSMUSG00000074305	Peak1	pseudopodium-enriched atypical kinase 1	3224.98	1764.51	1.82722	0.869653	0.0636091	0.535541
ENSMUSG00000029436	Mmp17	matrix metallopeptidase 17	216.419	19.0929	10.8207	3.43572	0.0637426	0.535724
ENSMUSG00000038132	Rbm24	RNA binding motif protein 24	137.113	3.75047	29.0734	4.86163	0.0639645	0.536765
ENSMUSG00000026672	Optn	optineurin	653.324	404.497	1.61364	0.690315	0.0639708	0.536765
ENSMUSG00000041624	Gucy1a2	guanylate cyclase 1, soluble, alpha 2	351.775	35.3335	9.70934	3.27937	0.0639294	0.536765
ENSMUSG00000090779	Gm17110	predicted gene 17110	36.7187	13.8421	2.54133	1.34559	0.0641126	0.537194
ENSMUSG00000091243	Vgll3	vestigial like family member 3	147.666	16.6253	8.43481	3.07636	0.064084	0.537194
ENSMUSG00000078670	Fam174b	family with sequence similarity 174, member B	296.433	170.391	1.73541	0.795273	0.0640915	0.537194
ENSMUSG00000050762	Prss27	protease, serine 27	7.17515	0	8.17515	3.03124	0.0642582	0.537697
ENSMUSG00000026888	Grb14	growth factor receptor bound protein 14	877.999	391.171	2.24137	1.16438	0.0642571	0.537697
ENSMUSG00000053004	Hrh1	histamine receptor H1	66.2944	26.6515	2.43366	1.28313	0.0642646	0.537697
ENSMUSG00000019775	Rgs17	regulator of G-protein signaling 17	21.9115	0.395403	16.4193	4.03732	0.064408	0.538022
ENSMUSG00000060568	Fam78b	family with sequence similarity 78, member B	38.3468	11.3782	3.17872	1.66845	0.0650627	0.539986
ENSMUSG00000022311	Csmd3	CUB and Sushi multiple domains 3	8.58442	0	9.58442	3.26069	0.0649609	0.539986
ENSMUSG00000081303	Gm16011	predicted gene 16011	8.58442	0	9.58442	3.26069	0.0649609	0.539986
ENSMUSG00000015467	Egfl8	EGF-like domain 8	69.6857	29.5582	2.31315	1.20986	0.0649597	0.539986
ENSMUSG00000048388	Fam171b	family with sequence similarity 171, member B	53.5336	21.9995	2.37107	1.24554	0.0649125	0.539986
ENSMUSG00000032231	Anxa2	annexin A2	1358.78	719.093	1.88834	0.917117	0.0649995	0.539986
ENSMUSG00000034837	Gnat1	guanine nucleotide binding protein, alpha transducing 1	20.2899	4.88266	3.6191	1.85563	0.0648526	0.539986
ENSMUSG00000022103	Gfra2	glial cell line derived neurotrophic factor family receptor alpha 2	42.0535	16.736	2.42746	1.27945	0.0653448	0.540851
ENSMUSG00000022246	Rai14	retinoic acid induced 14	1986.26	1154.97	1.71913	0.78168	0.0652344	0.540851
ENSMUSG00000086943	4732414G09Rik	RIKEN cDNA 4732414G09 gene	11.6025	0	12.6025	3.65564	0.0656578	0.54165
ENSMUSG00000054855	Rnd1	Rho family GTPase 1	423.153	76.891	5.44547	2.44506	0.0656464	0.54165
ENSMUSG00000034825	Nrip3	nuclear receptor interacting protein 3	50.8567	21.2775	2.32776	1.21894	0.0655994	0.54165
ENSMUSG00000030917	Tmem159	transmembrane protein 159	222.063	122.302	1.80908	0.855257	0.0655959	0.54165
ENSMUSG00000020928	Higd1b	HIG1 domain family, member 1B	14.1122	1.40498	6.28369	2.65161	0.0657373	0.54209
ENSMUSG00000016995	Matn4	matrilin 4	36.6608	15.6418	2.26302	1.17825	0.0658585	0.542437
ENSMUSG00000030084	Plxna1	plexin A1	1241.27	726.869	1.70673	0.771234	0.0658414	0.542437
ENSMUSG00000031872	Bean1	brain expressed, associated with Nedd4, 1	29.5822	7.36679	3.65519	1.86995	0.0659848	0.542609
ENSMUSG00000002845	Tmem39a	transmembrane protein 39a	312.881	174.849	1.78495	0.835883	0.0660935	0.542724
ENSMUSG00000067931	Zfp948	zinc finger protein 948	211.014	122.757	1.71315	0.776651	0.0660361	0.542724
ENSMUSG00000028794	A3galt2	alpha 1,3-galactosyltransferase 2 (isoglobotriaosylceramide synthase)	57.5684	14.9898	3.66285	1.87297	0.0661042	0.542724
ENSMUSG00000082154	Gm16464	predicted gene 16464	363.294	103.499	3.48611	1.80162	0.0660639	0.542724
ENSMUSG00000060260	Pwwp2b	PWWP domain containing 2B	160.485	88.4921	1.80446	0.85157	0.0661626	0.542987
ENSMUSG00000026207	Speg	SPEG complex locus	683.884	87.6009	7.72998	2.95046	0.0663179	0.543642
ENSMUSG00000009569	Mkl2	MKL/myocardin-like 2	1765.31	1022.2	1.72625	0.78764	0.0665031	0.544046
ENSMUSG00000056481	Cd248	CD248 antigen, endosialin	417.85	55.2708	7.44348	2.89598	0.0665001	0.544046
ENSMUSG00000058756	Thra	thyroid hormone receptor alpha	1832.04	1095.7	1.67142	0.741071	0.0667011	0.545017
ENSMUSG00000037712	Fermt2	fermitin family member 2	3243.18	1854.22	1.74868	0.806264	0.0668451	0.54543
ENSMUSG00000003228	Grk5	G protein-coupled receptor kinase 5	412.458	203.102	2.02574	1.01845	0.0668626	0.54543
ENSMUSG00000036634	Mag	myelin-associated glycoprotein	24.1123	4.97916	4.19998	2.07038	0.0669106	0.54543
ENSMUSG00000050751	Pgbd5	piggyBac transposable element derived 5	17.6065	3.45091	4.18038	2.06363	0.0668673	0.54543
ENSMUSG00000020580	Rock2	Rho-associated coiled-coil containing protein kinase 2	4036.89	2127.76	1.89683	0.923591	0.0671191	0.546913
ENSMUSG00000035342	Lzts2	leucine zipper, putative tumor suppressor 2	786.531	462.782	1.69806	0.763891	0.0671914	0.547069
ENSMUSG00000056091	St3gal5	ST3 beta-galactoside alpha-2,3-sialyltransferase 5	300.397	142.973	2.09343	1.06587	0.0671868	0.547069
ENSMUSG00000009210	Prr29	proline rich 29	41.0882	12.5376	3.10898	1.63644	0.0672955	0.54711
ENSMUSG00000021219	Rgs6	regulator of G-protein signaling 6	174.057	100.987	1.71646	0.779438	0.0672786	0.54711
ENSMUSG00000059408	Mrgprh	MAS-related GPR, member H	141.952	4.14554	27.7817	4.79606	0.0672346	0.54711
ENSMUSG00000051811	Cox6b2	cytochrome c oxidase subunit VIb polypeptide 2	76.3269	35.9261	2.0941	1.06633	0.0673563	0.547114
ENSMUSG00000023827	Agpat4	1-acylglycerol-3-phosphate O-acyltransferase 4 (lysophosphatidic acid acyltransferase, delta)	281.04	121.466	2.30301	1.20352	0.0674999	0.547297
ENSMUSG00000079442	St6galnac4	ST6 (alpha-N-acetyl-neuraminyl-2,3-beta-galactosyl-1,3)-N-acetylgalactosaminide alpha-2,6-sialyltransferase 4	176.824	85.4275	2.05749	1.04089	0.0675384	0.547297
ENSMUSG00000066861	Oas1g	2'-5' oligoadenylate synthetase 1G	109.3	36.3835	2.9505	1.56096	0.067631	0.547833
ENSMUSG00000024236	Svil	supervillin	2747.84	1646.68	1.6683	0.738382	0.0679313	0.5494
ENSMUSG00000033207	Mamdc2	MAM domain containing 2	135.819	4.34944	25.5764	4.67674	0.0679079	0.5494
ENSMUSG00000060183	Cxcl11	chemokine (C-X-C motif) ligand 11	37.4973	10.0911	3.471	1.79535	0.067965	0.549457
ENSMUSG00000065954	Tacc1	transforming, acidic coiled-coil containing protein 1	4862.62	2978.7	1.63225	0.706861	0.0679935	0.549472
ENSMUSG00000006642	Tcf23	transcription factor 23	61.1334	11.9721	4.78976	2.25995	0.0682224	0.550026
ENSMUSG00000055407	Map6	microtubule-associated protein 6	156.843	28.9547	5.26938	2.39763	0.0681916	0.550026
ENSMUSG00000041974	Spidr	scaffolding protein involved in DNA repair	480.877	257.113	1.86692	0.90066	0.0682728	0.550217
ENSMUSG00000085743	8430419K02Rik	RIKEN cDNA 8430419K02 gene	16.0556	4.14538	3.31474	1.7289	0.068395	0.55054
ENSMUSG00000041324	Inhba	inhibin beta-A	141.308	4.63745	25.2434	4.65783	0.0684198	0.55054
ENSMUSG00000038738	Shank1	SH3/ankyrin domain gene 1	118.007	54.2436	2.15422	1.10717	0.0684021	0.55054
ENSMUSG00000070644	Etnk2	ethanolamine kinase 2	358.828	76.0859	4.66788	2.22277	0.0687864	0.550807
ENSMUSG00000013698	Pea15a	phosphoprotein enriched in astrocytes 15A	2313	1352.12	1.71012	0.774096	0.0685744	0.550807
ENSMUSG00000036473	Tbc1d24	TBC1 domain family, member 24	316.91	186.69	1.6938	0.760265	0.0687515	0.550807
ENSMUSG00000035372	1810055G02Rik	RIKEN cDNA 1810055G02 gene	293.866	161.489	1.81468	0.859718	0.0686687	0.550807
ENSMUSG00000055044	Pdlim1	PDZ and LIM domain 1 (elfin)	166.425	22.2329	7.20636	2.84927	0.0687004	0.550807
ENSMUSG00000010797	Wnt2	wingless-type MMTV integration site family, member 2	19.0608	1.82715	7.09578	2.82696	0.0686719	0.550807
ENSMUSG00000030409	Dmpk	dystrophia myotonica-protein kinase	1023.1	124.779	8.14203	3.02539	0.0686709	0.550807
ENSMUSG00000038260	Trpm4	transient receptor potential cation channel, subfamily M, member 4	241.96	134.882	1.78803	0.838368	0.0686944	0.550807
ENSMUSG00000035692	Isg15	ISG15 ubiquitin-like modifier	338.467	33.3729	9.876	3.30393	0.0690892	0.552472
ENSMUSG00000038583	Pln	phospholamban	887.792	34.0342	25.3693	4.66501	0.0691664	0.552568
ENSMUSG00000024867	Pip5k1b	phosphatidylinositol-4-phosphate 5-kinase, type 1 beta	271.671	63.6208	4.21955	2.07709	0.0691825	0.552568
ENSMUSG00000079457	Gm7609	predicted pseudogene 7609	66.5133	26.4796	2.45685	1.29681	0.0696195	0.553588
ENSMUSG00000025355	Mmp19	matrix metallopeptidase 19	33.173	12.2336	2.5823	1.36866	0.0694231	0.553588
ENSMUSG00000045007	Tubg2	tubulin, gamma 2	23.9386	6.50641	3.32231	1.73219	0.069804	0.553588
ENSMUSG00000022377	Asap1	ArfGAP with SH3 domain, ankyrin repeat and PH domain1	1779.76	1042.98	1.70575	0.770404	0.0696697	0.553588
ENSMUSG00000033039	Micall1	microtubule associated monooxygenase, calponin and LIM domain containing -like 1	1535.45	940.342	1.63219	0.706811	0.0696595	0.553588
ENSMUSG00000055022	Cntn1	contactin 1	73.7526	2.85244	19.4039	4.27828	0.0698642	0.553588
ENSMUSG00000005958	Ephb3	Eph receptor B3	111.733	58.7518	1.88669	0.915855	0.0698768	0.553588
ENSMUSG00000038677	Scube3	signal peptide, CUB domain, EGF-like 3	758.351	319.892	2.36638	1.24268	0.0696387	0.553588
ENSMUSG00000044345	Marveld1	MARVEL (membrane-associating) domain containing 1	1694.72	378.507	4.46822	2.1597	0.0698317	0.553588
ENSMUSG00000029298	Gbp9	guanylate-binding protein 9	1103.7	231.549	4.75037	2.24804	0.0698834	0.553588
ENSMUSG00000076525	Igkv1-99	immunoglobulin kappa variable 1-99	26.3583	0	27.3583	4.77391	0.0697562	0.553588
ENSMUSG00000051586	Mical3	microtubule associated monooxygenase, calponin and LIM domain containing 3	1281.96	773.537	1.65642	0.728066	0.0695803	0.553588
ENSMUSG00000092526	Gm17907	predicted gene, 17907	51.7962	21.3855	2.3585	1.23787	0.0699009	0.553588
ENSMUSG00000031595	Pdgfrl	platelet-derived growth factor receptor-like	25.8563	8.80942	2.7378	1.45302	0.0699675	0.553714
ENSMUSG00000021922	Itih4	inter alpha-trypsin inhibitor, heavy chain 4	245.898	3.75064	51.9715	5.69965	0.0702851	0.554924
ENSMUSG00000013419	Zfp651	zinc finger protein 651	332.985	191.67	1.73346	0.793652	0.070262	0.554924
ENSMUSG00000053552	Ebf4	early B cell factor 4	67.4077	16.9787	3.80492	1.92787	0.0703739	0.555409
ENSMUSG00000003411	Rab3b	RAB3B, member RAS oncogene family	8.97696	0.245704	8.00909	3.00164	0.0704006	0.555409
ENSMUSG00000036523	Greb1	gene regulated by estrogen in breast cancer protein	131.328	39.848	3.23951	1.69577	0.070638	0.556743
ENSMUSG00000070003	Ssbp4	single stranded DNA binding protein 4	504.526	302.561	1.66532	0.735799	0.0706507	0.556743
ENSMUSG00000023411	Nfatc4	nuclear factor of activated T cells, cytoplasmic, calcineurin dependent 4	146.875	8.29109	15.9158	3.99238	0.0706949	0.556878
ENSMUSG00000023009	Nckap5l	NCK-associated protein 5-like	284.895	108.064	2.62135	1.39031	0.0708191	0.55743
ENSMUSG00000031015	Swap70	SWA-70 protein	1865.33	1065.89	1.74932	0.806791	0.0708054	0.55743
ENSMUSG00000026620	Mark1	MAP/microtubule affinity regulating kinase 1	540.542	28.3257	18.4665	4.20684	0.0712275	0.55837
ENSMUSG00000038594	Cep85l	centrosomal protein 85-like	430.663	207.435	2.07097	1.05031	0.0712119	0.55837
ENSMUSG00000020160	Meis1	Meis homeobox 1	478.038	81.5471	5.80321	2.53685	0.0712973	0.55837
ENSMUSG00000047511	Olfr1396	olfactory receptor 1396	17.8767	2.75627	5.02538	2.32923	0.0712348	0.55837
ENSMUSG00000038319	Kcnh2	potassium voltage-gated channel, subfamily H (eag-related), member 2	166.302	16.2681	9.68854	3.27628	0.0711686	0.55837
ENSMUSG00000031626	Sorbs2	sorbin and SH3 domain containing 2	3499.95	511.28	6.83406	2.77274	0.0713214	0.55837
ENSMUSG00000031618	Nr3c2	nuclear receptor subfamily 3, group C, member 2	1006.76	569.684	1.76588	0.820387	0.0712986	0.55837
ENSMUSG00000032113	Chek1	checkpoint kinase 1	16.9372	4.26831	3.40473	1.76754	0.0713271	0.55837
ENSMUSG00000039891	Txlnb	taxilin beta	99.4996	37.0198	2.64335	1.40237	0.071789	0.561203
ENSMUSG00000035168	Tanc1	tetratricopeptide repeat, ankyrin repeat and coiled-coil containing 1	3564.75	2341.53	1.52218	0.606137	0.0718432	0.561413
ENSMUSG00000019853	Hebp2	heme binding protein 2	31.3647	12.9548	2.31925	1.21366	0.0719849	0.561414
ENSMUSG00000021223	Papln	papilin, proteoglycan-like sulfated glycoprotein	101.096	50.1375	1.99649	0.997466	0.072012	0.561414
ENSMUSG00000005580	Adcy9	adenylate cyclase 9	1057.18	610.155	1.73145	0.791981	0.0720342	0.561414
ENSMUSG00000050447	Lypd6	LY6/PLAUR domain containing 6	90.7221	46.7393	1.92131	0.942092	0.0721094	0.561575
ENSMUSG00000033705	Stard9	START domain containing 9	2836.86	1622.46	1.74803	0.80573	0.0720828	0.561575
ENSMUSG00000034586	Hid1	HID1 domain containing	150.369	59.6907	2.49411	1.31852	0.0723285	0.561889
ENSMUSG00000001403	Ube2c	ubiquitin-conjugating enzyme E2C	19.8974	4.56821	3.75298	1.90803	0.0722956	0.561889
ENSMUSG00000041842	Fhdc1	FH2 domain containing 1	81.964	34.3916	2.34417	1.22908	0.0723238	0.561889
ENSMUSG00000032988	Slc16a8	solute carrier family 16 (monocarboxylic acid transporters), member 8	22.6838	6.66783	3.08872	1.62701	0.0724946	0.562024
ENSMUSG00000086308	G630016G05Rik	RIKEN cDNA G630016G05 gene	22.761	4.6796	4.18357	2.06473	0.0725363	0.562136
ENSMUSG00000032193	Ldlr	low density lipoprotein receptor	831.808	408.454	2.03395	1.02428	0.0727048	0.563027
ENSMUSG00000049999	Ppp1r3d	protein phosphatase 1, regulatory subunit 3D	55.1038	22.5333	2.38402	1.2534	0.0728956	0.563859
ENSMUSG00000001517	Foxm1	forkhead box M1	102.054	45.3979	2.2211	1.15128	0.0728767	0.563859
ENSMUSG00000027394	Ttl	tubulin tyrosine ligase	432.047	247.901	1.73983	0.798949	0.0729287	0.563903
ENSMUSG00000020123	Avpr1a	arginine vasopressin receptor 1A	109.185	63.8208	1.69983	0.765394	0.0730256	0.564229
ENSMUSG00000037583	Nr0b2	nuclear receptor subfamily 0, group B, member 2	39.9363	16.0637	2.39903	1.26245	0.0730916	0.564315
ENSMUSG00000066894	Vsig10	V-set and immunoglobulin domain containing 10	165.788	89.2844	1.84736	0.885464	0.073072	0.564315
ENSMUSG00000054256	Msi1	musashi RNA-binding protein 1	34.6595	12.1262	2.71667	1.44184	0.0732053	0.564981
ENSMUSG00000023886	Smoc2	SPARC related modular calcium binding 2	228.698	59.9943	3.76589	1.91299	0.0732483	0.565027
ENSMUSG00000023236	Scg5	secretogranin V	146.824	85.3329	1.71225	0.775893	0.073266	0.565027
ENSMUSG00000043099	Hic1	hypermethylated in cancer 1	161.251	83.7713	1.91399	0.93658	0.0735356	0.565924
ENSMUSG00000018672	Copz2	coatomer protein complex, subunit zeta 2	340.984	197.204	1.72541	0.786941	0.0735837	0.565924
ENSMUSG00000075318	Scn2a	sodium channel, voltage-gated, type II, alpha	74.0873	9.62716	7.0656	2.82081	0.0734353	0.565924
ENSMUSG00000027338	Prnd	prion like protein doppel	13.6038	1.82732	5.16525	2.36884	0.0734903	0.565924
ENSMUSG00000027457	Snph	syntaphilin	24.3247	6.49103	3.38067	1.75731	0.0736481	0.565924
ENSMUSG00000028634	Hivep3	human immunodeficiency virus type I enhancer binding protein 3	394.466	219.92	1.79009	0.840031	0.0735667	0.565924
ENSMUSG00000020728	Cep112	centrosomal protein 112	254.399	131.356	1.92964	0.948329	0.0737411	0.566357
ENSMUSG00000028035	Dnajb4	DnaJ heat shock protein family (Hsp40) member B4	1214.09	704.538	1.72222	0.784271	0.0739023	0.56675
ENSMUSG00000030098	Grip2	glutamate receptor interacting protein 2	981.565	86.7814	11.1933	3.48457	0.0738948	0.56675
ENSMUSG00000030607	Acan	aggrecan	6.85981	0	7.85981	2.97449	0.0740148	0.566979
ENSMUSG00000058173	Smco4	single-pass membrane protein with coiled-coil domains 4	281.909	158.463	1.77414	0.827117	0.0739943	0.566979
ENSMUSG00000036968	Cnpy4	canopy FGF signaling regulator 4	349.677	199.626	1.74792	0.805636	0.0743792	0.568712
ENSMUSG00000029708	Gcc1	golgi coiled coil 1	1543.92	708.745	2.17672	1.12216	0.074372	0.568712
ENSMUSG00000022146	Osmr	oncostatin M receptor	1648.16	358.004	4.59373	2.19966	0.0744663	0.568744
ENSMUSG00000059895	Ptp4a3	protein tyrosine phosphatase 4a3	1061.49	156.703	6.73729	2.75217	0.0744175	0.568744
ENSMUSG00000046080	Clec9a	C-type lectin domain family 9, member a	317.65	180.042	1.76009	0.815651	0.0744399	0.568744
ENSMUSG00000019992	Mtfr2	mitochondrial fission regulator 2	25.5216	8.78249	2.71113	1.43889	0.0745998	0.569553
ENSMUSG00000006576	Slc4a3	solute carrier family 4 (anion exchanger), member 3	798.538	218.692	3.63936	1.86369	0.0747633	0.569759
ENSMUSG00000047146	Tet1	tet methylcytosine dioxygenase 1	204.765	80.5582	2.52292	1.3351	0.0747652	0.569759
ENSMUSG00000039110	Mycbpap	MYCBP associated protein	122.421	68.9108	1.76541	0.820006	0.0747267	0.569759
ENSMUSG00000024501	Dpysl3	dihydropyrimidinase-like 3	960.329	111.517	8.54388	3.09489	0.0747505	0.569759
ENSMUSG00000026829	Gbgt1	globoside alpha-1,3-N-acetylgalactosaminyltransferase 1	71.8031	25.1982	2.77893	1.47453	0.0746639	0.569759
ENSMUSG00000054196	Cthrc1	collagen triple helix repeat containing 1	19.936	4.18802	4.03544	2.01273	0.0749172	0.570496
ENSMUSG00000033213	AA467197	expressed sequence AA467197	18.1534	3.54691	4.21241	2.07464	0.0748963	0.570496
ENSMUSG00000030302	Atp2b2	ATPase, Ca++ transporting, plasma membrane 2	433.346	146.886	2.93704	1.55436	0.0749638	0.570639
ENSMUSG00000027612	Mmp24	matrix metallopeptidase 24	31.294	11.8649	2.51023	1.32782	0.0750151	0.57074
ENSMUSG00000089273	Gm24550	predicted gene, 24550	6.8019	0	7.8019	2.96383	0.0751131	0.571135
ENSMUSG00000027993	Trim2	tripartite motif-containing 2	2140.35	1355.04	1.57912	0.65912	0.0752795	0.571563
ENSMUSG00000089791	Gm3555	predicted pseudogene 3555	580.652	257.26	2.2522	1.17133	0.0753501	0.571889
ENSMUSG00000042363	Lgalsl	lectin, galactoside binding-like	544.197	130.655	4.1411	2.05001	0.0754131	0.572156
ENSMUSG00000027523	Gnas	GNAS (guanine nucleotide binding protein, alpha stimulating) complex locus	1368.01	809.135	1.68986	0.756903	0.0755076	0.572299
ENSMUSG00000035172	Plekhh3	pleckstrin homology domain containing, family H (with MyTH4 domain) member 3	276.278	86.8926	3.15474	1.65752	0.075852	0.573373
ENSMUSG00000041886	Macc1	metastasis associated in colon cancer 1	52.0665	26.1827	1.95221	0.96511	0.0757825	0.573373
ENSMUSG00000035064	Eef2k	eukaryotic elongation factor-2 kinase	385.122	161.046	2.38279	1.25265	0.075831	0.573373
ENSMUSG00000043542	Zc2hc1a	zinc finger, C2HC-type containing 1A	447.542	229.258	1.948	0.961991	0.0760624	0.574331
ENSMUSG00000039830	Olig2	oligodendrocyte transcription factor 2	6.744	0	7.744	2.95308	0.0762331	0.575409
ENSMUSG00000020422	Tns3	tensin 3	4136.87	2542.52	1.62683	0.702061	0.0763974	0.575824
ENSMUSG00000020592	Sdc1	syndecan 1	340.977	174.808	1.94517	0.959897	0.076359	0.575824
ENSMUSG00000026208	Des	desmin	605.787	74.2713	8.06133	3.01102	0.076573	0.576706
ENSMUSG00000014813	Stc1	stanniocalcin 1	215.685	98.7696	2.17186	1.11893	0.0766648	0.576781
ENSMUSG00000031539	Ap3m2	adaptor-related protein complex 3, mu 2 subunit	280.391	162	1.72633	0.787705	0.0766777	0.576781
ENSMUSG00000031748	Gnao1	guanine nucleotide binding protein, alpha O	256.329	37.5342	6.67795	2.73941	0.076695	0.576781
ENSMUSG00000041479	Syt15	synaptotagmin XV	236.992	52.4865	4.44957	2.15367	0.0768449	0.577697
ENSMUSG00000044083	Efcab8	EF-hand calcium binding domain 8	9.76205	1.03634	5.28499	2.4019	0.0769626	0.578371
ENSMUSG00000056008	Gm11541	predicted gene 11541	6.70539	0	7.70539	2.94587	0.0769922	0.578382
ENSMUSG00000025551	Fgf14	fibroblast growth factor 14	14.4854	2.07302	5.03915	2.33318	0.0772499	0.579473
ENSMUSG00000028268	Gbp3	guanylate binding protein 3	3391.85	329.035	10.2803	3.36181	0.0772914	0.579573
ENSMUSG00000039286	Fndc3b	fibronectin type III domain containing 3B	2022.89	1235	1.63744	0.711446	0.077369	0.579732
ENSMUSG00000024754	Tmem2	transmembrane protein 2	2020.81	1254.02	1.61098	0.687943	0.0774844	0.580386
ENSMUSG00000041556	Fbxo2	F-box protein 2	18.4044	1.77346	6.99646	2.80663	0.0775526	0.580686
ENSMUSG00000030703	Gdpd3	glycerophosphodiester phosphodiesterase domain containing 3	31.1138	8.89455	3.2456	1.69849	0.0780265	0.582854
ENSMUSG00000060034	Ctf2	cardiotrophin 2	8.52651	0.395403	6.82707	2.77127	0.078097	0.582854
ENSMUSG00000035566	Pcdh17	protocadherin 17	1396.48	816.051	1.7104	0.774333	0.0781255	0.582856
ENSMUSG00000019235	Rps6kl1	ribosomal protein S6 kinase-like 1	33.72	10.8445	2.93133	1.55155	0.0782974	0.583395
ENSMUSG00000076615	Ighg3	Immunoglobulin heavy constant gamma 3	31.7895	0.790806	18.3099	4.19455	0.0782557	0.583395
ENSMUSG00000054640	Slc8a1	solute carrier family 8 (sodium/calcium exchanger), member 1	5543.93	2869.58	1.93164	0.949825	0.0783111	0.583395
ENSMUSG00000032514	Ttc21a	tetratricopeptide repeat domain 21A	141.701	50.0437	2.79566	1.48319	0.0782698	0.583395
ENSMUSG00000047591	Mafa	v-maf musculoaponeurotic fibrosarcoma oncogene family, protein A (avian)	18.2886	3.05584	4.75575	2.24967	0.0784076	0.583709
ENSMUSG00000040136	Abcc8	ATP-binding cassette, sub-family C (CFTR/MRP), member 8	31.3582	1.15928	14.9857	3.90551	0.0784357	0.583709
ENSMUSG00000031897	Psmb10	proteasome (prosome, macropain) subunit, beta type 10	461.262	159.184	2.88581	1.52898	0.0784383	0.583709
ENSMUSG00000078921	Tgtp2	T cell specific GTPase 2	2869.45	216.993	13.1676	3.71892	0.0784986	0.583736
ENSMUSG00000005672	Kit	KIT proto-oncogene receptor tyrosine kinase	567.365	306.059	1.851	0.888302	0.0784933	0.583736
ENSMUSG00000028445	Enho	energy homeostasis associated	25.0519	6.90198	3.29688	1.7211	0.0788072	0.585185
ENSMUSG00000061666	Gdpd1	glycerophosphodiester phosphodiesterase domain containing 1	47.3431	19.8038	2.32377	1.21647	0.0789484	0.585811
ENSMUSG00000038418	Egr1	early growth response 1	22705.8	10360	2.19156	1.13196	0.0789261	0.585811
ENSMUSG00000024960	Plcb3	phospholipase C, beta 3	1309.06	779.913	1.6776	0.746395	0.0790334	0.585857
ENSMUSG00000028195	Cyr61	cysteine rich protein 61	4139.15	1706.15	2.42519	1.2781	0.0791475	0.586021
ENSMUSG00000048807	Slc35e4	solute carrier family 35, member E4	272.244	142.47	1.90453	0.929436	0.0792001	0.586027
ENSMUSG00000069170	Adgrv1	adhesion G protein-coupled receptor V1	55.0266	24.7928	2.17218	1.11914	0.079242	0.586027
ENSMUSG00000036560	Lgi4	leucine-rich repeat LGI family, member 4	18.1921	3.02891	4.76359	2.25205	0.0792375	0.586027
ENSMUSG00000086584	Gm12002	predicted gene 12002	45.9596	15.5665	2.83461	1.50315	0.0793415	0.586193
ENSMUSG00000000359	Rem1	rad and gem related GTP binding protein 1	49.8142	21.3854	2.26997	1.18268	0.079315	0.586193
ENSMUSG00000036095	Dgkb	diacylglycerol kinase, beta	881.949	41.3545	20.8466	4.38174	0.079408	0.586278
ENSMUSG00000045932	Ifit2	interferon-induced protein with tetratricopeptide repeats 2	2167.18	324.178	6.66768	2.73718	0.0794858	0.586278
ENSMUSG00000026442	Nfasc	neurofascin	33.7651	10.9522	2.90868	1.54036	0.0796245	0.58681
ENSMUSG00000086243	Gm12121	predicted gene 12121	54.2738	25.5577	2.08127	1.05747	0.0797023	0.586853
ENSMUSG00000091071	1700030C10Rik	RIKEN cDNA 1700030C10 gene	15.4893	1.86963	5.74615	2.5226	0.079963	0.586853
ENSMUSG00000044951	Mylk4	myosin light chain kinase family, member 4	17.1688	1.03634	8.92228	3.15741	0.0799724	0.586853
ENSMUSG00000084845	Tmem240	transmembrane protein 240	27.6067	8.36083	3.056	1.61164	0.0799533	0.586853
ENSMUSG00000030525	Chrna7	cholinergic receptor, nicotinic, alpha polypeptide 7	270.911	9.62766	25.5852	4.67724	0.0796779	0.586853
ENSMUSG00000037725	Ckap2	cytoskeleton associated protein 2	17.6065	3.80433	3.87285	1.9534	0.0798262	0.586853
ENSMUSG00000053310	Nrgn	neurogranin	79.5508	38.5745	2.03542	1.02533	0.0798355	0.586853
ENSMUSG00000032366	Tpm1	tropomyosin 1, alpha	6589.79	1225.72	5.37271	2.42565	0.0799683	0.586853
ENSMUSG00000029304	Spp1	secreted phosphoprotein 1	21593.5	12162	1.77543	0.828165	0.0800124	0.586938
ENSMUSG00000058897	Col25a1	collagen, type XXV, alpha 1	22.1882	5.37423	3.63781	1.86307	0.0800895	0.58694
ENSMUSG00000049439	Cyp20a1	cytochrome P450, family 20, subfamily a, polypeptide 1	383.687	236.787	1.61778	0.694014	0.080239	0.587763
ENSMUSG00000039699	Batf2	basic leucine zipper transcription factor, ATF-like 2	410.9	33.8526	11.8184	3.56296	0.0802683	0.587768
ENSMUSG00000027765	P2ry1	purinergic receptor P2Y, G-protein coupled 1	166.985	94.19	1.76473	0.819448	0.0803461	0.587951
ENSMUSG00000066258	Trim12a	tripartite motif-containing 12A	434.041	127.049	3.39746	1.76446	0.0804361	0.587951
ENSMUSG00000032502	Stac	src homology three (SH3) and cysteine rich domain	192.654	9.30033	18.8007	4.23272	0.0804354	0.587951
ENSMUSG00000034459	Ifit1	interferon-induced protein with tetratricopeptide repeats 1	3064.75	163.582	18.6275	4.21936	0.08059	0.588867
ENSMUSG00000079173	Zan	zonadhesin	22.111	6.95534	2.90509	1.53858	0.080623	0.5889
ENSMUSG00000042734	Ttc9	tetratricopeptide repeat domain 9	26.5255	6.97122	3.45311	1.7879	0.0806849	0.589143
ENSMUSG00000063065	Mapk3	mitogen-activated protein kinase 3	1071.5	634.629	1.68731	0.754726	0.0807464	0.589383
ENSMUSG00000037295	Ldlrap1	low density lipoprotein receptor adaptor protein 1	415.444	233.984	1.77222	0.82556	0.080991	0.59075
ENSMUSG00000023341	Mx2	MX dynamin-like GTPase 2	847.065	56.3	14.8004	3.88757	0.0813909	0.59178
ENSMUSG00000055235	Wdr86	WD repeat domain 86	37.1885	14.0493	2.53755	1.34344	0.0813779	0.59178
ENSMUSG00000025867	Cplx2	complexin 2	407.065	229.586	1.76969	0.823495	0.0815974	0.592653
ENSMUSG00000003948	Mmd	monocyte to macrophage differentiation-associated	463.804	257.911	1.79523	0.844166	0.0820302	0.595167
ENSMUSG00000035390	Brsk1	BR serine/threonine kinase 1	63.5852	15.4548	3.925	1.97269	0.082013	0.595167
ENSMUSG00000036438	Calm2	calmodulin 2	2457.99	1520.01	1.61668	0.693036	0.0821461	0.595588
ENSMUSG00000003380	Rabac1	Rab acceptor 1 (prenylated)	511.611	302.057	1.69146	0.758273	0.082205	0.595805
ENSMUSG00000021493	Pdlim7	PDZ and LIM domain 7	1023.24	208.353	4.89241	2.29054	0.082257	0.595972
ENSMUSG00000024027	Glp1r	glucagon-like peptide 1 receptor	276.954	14.2955	18.1722	4.18366	0.0824622	0.596298
ENSMUSG00000029359	Tesc	tescalcin	191.509	116.921	1.63253	0.707108	0.0825604	0.596298
ENSMUSG00000029798	Herc6	hect domain and RLD 6	1140.49	322.669	3.52673	1.81833	0.0825295	0.596298
ENSMUSG00000037242	Clic4	chloride intracellular channel 4 (mitochondrial)	7127.9	3732.4	1.90949	0.933189	0.0828043	0.597206
ENSMUSG00000040594	Ranbp17	RAN binding protein 17	22.1303	6.58704	3.04866	1.60818	0.0828708	0.59725
ENSMUSG00000074028	Slc22a13	solute carrier family 22 (organic cation transporter), member 13	339.64	45.2134	7.37101	2.88186	0.082881	0.59725
ENSMUSG00000021379	Id4	inhibitor of DNA binding 4	229.483	127.549	1.79295	0.842334	0.083285	0.599349
ENSMUSG00000042453	Reln	reelin	97.1445	57.8476	1.66777	0.737924	0.0833052	0.599349
ENSMUSG00000078091	Gm10912	predicted gene 10912	8.41069	0.245704	7.55452	2.91734	0.0834043	0.599698
ENSMUSG00000027016	Zfp385b	zinc finger protein 385B	85.9731	41.2323	2.0594	1.04222	0.0836791	0.600989
ENSMUSG00000021140	Pcnx	pecanex homolog (Drosophila)	2174.47	1342.24	1.61957	0.695607	0.0837539	0.601037
ENSMUSG00000024757	Slc22a19	solute carrier family 22 (organic anion transporter), member 19	286.801	22.9673	12.0081	3.58593	0.0837641	0.601037
ENSMUSG00000025510	Cd151	CD151 antigen	951.328	622.052	1.52849	0.612106	0.0837841	0.601037
ENSMUSG00000078922	Tgtp1	T cell specific GTPase 1	600.324	41.8071	14.0473	3.81222	0.0840636	0.601518
ENSMUSG00000030793	Pycard	PYD and CARD domain containing	224.238	125.287	1.78353	0.834739	0.084074	0.601518
ENSMUSG00000027827	Kcnab1	potassium voltage-gated channel, shaker-related subfamily, beta member 1	426.454	26.2257	15.7004	3.97273	0.0841832	0.602076
ENSMUSG00000027221	Chst1	carbohydrate (keratan sulfate Gal-6) sulfotransferase 1	25.8949	8.06109	2.96817	1.56957	0.084327	0.602316
ENSMUSG00000043279	Trim56	tripartite motif-containing 56	2751.13	1512.76	1.81807	0.86241	0.0843319	0.602316
ENSMUSG00000042613	Pbxip1	pre B cell leukemia transcription factor interacting protein 1	3231.11	1674.63	1.92889	0.947774	0.0845403	0.603177
ENSMUSG00000048988	Elfn1	leucine rich repeat and fibronectin type III, extracellular 1	246.561	150.596	1.63303	0.707553	0.0847052	0.603726
ENSMUSG00000026109	Tmeff2	transmembrane protein with EGF-like and two follistatin-like domains 2	83.5533	10.487	7.36075	2.87985	0.0847638	0.603837
ENSMUSG00000050541	Adra1b	adrenergic receptor, alpha 1b	14.9552	2.59119	4.44286	2.15149	0.0848087	0.603837
ENSMUSG00000083305	Gm13315	predicted gene 13315	51.4679	4.63695	9.30785	3.21845	0.0848732	0.603899
ENSMUSG00000074676	Foxs1	forkhead box S1	95.426	3.54691	21.2069	4.40646	0.0848761	0.603899
ENSMUSG00000034201	Gas2l1	growth arrest-specific 2 like 1	529.41	324.199	1.63103	0.705787	0.0851943	0.604076
ENSMUSG00000033576	Apol6	apolipoprotein L 6	19.833	0	20.833	4.3808	0.0851903	0.604076
ENSMUSG00000073980	Gm9574	predicted gene 9574	15.7017	3.0555	4.11827	2.04204	0.0851106	0.604076
ENSMUSG00000090397	Gm17096	predicted gene 17096	64.0808	29.0666	2.16455	1.11407	0.085071	0.604076
ENSMUSG00000047420	Fam180a	family with sequence similarity 180, member A	16.1393	0.491408	11.492	3.52256	0.0850662	0.604076
ENSMUSG00000033174	Mgll	monoglyceride lipase	1229.63	744.682	1.65035	0.72277	0.0850758	0.604076
ENSMUSG00000038884	A230050P20Rik	RIKEN cDNA A230050P20 gene	308.267	160.991	1.90916	0.932942	0.0851179	0.604076
ENSMUSG00000029999	Tgfa	transforming growth factor alpha	135.156	56.1238	2.38353	1.2531	0.0852256	0.60409
ENSMUSG00000038248	Sobp	sine oculis-binding protein homolog (Drosophila)	40.007	16.0376	2.40686	1.26715	0.0853678	0.604266
ENSMUSG00000003545	Fosb	FBJ osteosarcoma oncogene B	16432.9	6598.11	2.49033	1.31633	0.0853159	0.604266
ENSMUSG00000085541	Gm16010	predicted gene 16010	890.64	264.22	3.36189	1.74927	0.0853433	0.604266
ENSMUSG00000073490	Ifi207	interferon activated gene 207	1439.1	741.001	1.94084	0.956679	0.0855862	0.604391
ENSMUSG00000091191	Gm17334	predicted gene, 17334	154.262	52.7593	2.8881	1.53012	0.085591	0.604391
ENSMUSG00000038700	Hoxb5	homeobox B5	171.496	103.516	1.65042	0.722835	0.0855121	0.604391
ENSMUSG00000039357	Fut11	fucosyltransferase 11	217.114	111.967	1.93078	0.949187	0.0855323	0.604391
ENSMUSG00000027996	Sfrp2	secreted frizzled-related protein 2	539.326	125.892	4.25815	2.09023	0.0858366	0.605032
ENSMUSG00000085180	AI838599	expressed sequence AI838599	253.781	47.7013	5.23151	2.38723	0.085937	0.605032
ENSMUSG00000043340	6530409C15Rik	RIKEN cDNA 6530409C15 gene	78.2831	32.2654	2.38335	1.25299	0.0858615	0.605032
ENSMUSG00000016487	Ppfibp1	PTPRF interacting protein, binding protein 1 (liprin beta 1)	3401.56	2196.31	1.54851	0.630884	0.0859745	0.605032
ENSMUSG00000006360	Crip1	cysteine-rich protein 1 (intestinal)	1145.77	300.733	3.80061	1.92623	0.0861264	0.605745
ENSMUSG00000040435	Ppp1r15a	protein phosphatase 1, regulatory (inhibitor) subunit 15A	8130.66	4091.07	1.98718	0.990721	0.0861357	0.605745
ENSMUSG00000002324	Rec8	REC8 meiotic recombination protein	64.4477	29.5042	2.14553	1.10134	0.0864911	0.606618
ENSMUSG00000022231	Sema5a	sema domain, seven thrombospondin repeats (type 1 and type 1-like), transmembrane domain (TM) and short cytoplasmic domain, (semaphorin) 5A	1911.9	1200.9	1.59156	0.670443	0.0865439	0.606618
ENSMUSG00000041189	Chrnb1	cholinergic receptor, nicotinic, beta polypeptide 1 (muscle)	146.688	71.8308	2.02783	1.01993	0.0866184	0.606653
ENSMUSG00000026018	Ica1l	islet cell autoantigen 1-like	147.834	81.6334	1.80113	0.848905	0.0867786	0.607568
ENSMUSG00000083993	Gm14398	predicted gene 14398	9.80066	0.491408	7.24192	2.85637	0.0870142	0.608551
ENSMUSG00000020841	Cpd	carboxypeptidase D	4406.34	2722.23	1.61842	0.69459	0.0872431	0.609163
ENSMUSG00000075585	6330403L08Rik	RIKEN cDNA 6330403L08 gene	260.133	106.739	2.42374	1.27724	0.0874082	0.609903
ENSMUSG00000038235	F11r	F11 receptor	1043.67	652.307	1.59904	0.677207	0.0875733	0.610277
ENSMUSG00000029605	Oas1b	2'-5' oligoadenylate synthetase 1B	114.159	37.6074	2.98281	1.57667	0.0875626	0.610277
ENSMUSG00000057137	Tmem140	transmembrane protein 140	382.181	215.486	1.77	0.823751	0.0876986	0.610277
ENSMUSG00000025278	Flnb	filamin, beta	6688.88	4457.86	1.50036	0.585306	0.0878917	0.610413
ENSMUSG00000031586	Rbpms	RNA binding protein gene with multiple splicing	1624.67	785.949	2.06579	1.04669	0.0878794	0.610413
ENSMUSG00000063558	Aox1	aldehyde oxidase 1	49.4795	24.0985	2.01126	1.0081	0.088292	0.612334
ENSMUSG00000032015	Pou2f3	POU domain, class 2, transcription factor 3	6.40936	0	7.40936	2.88935	0.0882636	0.612334
ENSMUSG00000037151	Lrrc20	leucine rich repeat containing 20	68.283	31.5772	2.12673	1.08864	0.0883263	0.612366
ENSMUSG00000052852	Reep1	receptor accessory protein 1	87.6525	16.3799	5.10085	2.35074	0.0883732	0.612485
ENSMUSG00000024485	Slc4a9	solute carrier family 4, sodium bicarbonate cotransporter, member 9	866.662	531.672	1.62889	0.703886	0.0884112	0.612542
ENSMUSG00000087143	A830082K12Rik	RIKEN cDNA A830082K12 gene	33.2823	8.29075	3.68994	1.8836	0.0886493	0.613214
ENSMUSG00000056596	Trnp1	TMF1-regulated nuclear protein 1	21.4289	4.88315	3.8124	1.9307	0.0886496	0.613214
ENSMUSG00000032315	Cyp1a1	cytochrome P450, family 1, subfamily a, polypeptide 1	78.264	8.93253	7.98025	2.99643	0.0887648	0.613547
ENSMUSG00000024906	Mus81	MUS81 structure-specific endonuclease subunit	239.303	136.766	1.74428	0.802631	0.0888626	0.613605
ENSMUSG00000060621	Nkpd1	NTPase, KAP family P-loop domain containing 1	20.6824	4.58359	3.88324	1.95726	0.0888966	0.613634
ENSMUSG00000030527	Crtc3	CREB regulated transcription coactivator 3	1076.61	443.801	2.42268	1.27661	0.0889445	0.613759
ENSMUSG00000020548	1700086D15Rik	RIKEN cDNA 1700086D15 gene	31.1459	9.15147	3.16662	1.66295	0.0890293	0.614138
ENSMUSG00000089991	Gm16332	predicted gene 16332	30.0713	7.4362	3.68309	1.88092	0.0890922	0.614366
ENSMUSG00000086098	Gm14291	predicted gene 14291	6.37075	0	7.37075	2.88181	0.0891356	0.614459
ENSMUSG00000021130	Galnt16	UDP-N-acetyl-alpha-D-galactosamine:polypeptide N-acetylgalactosaminyltransferase 16	11.2357	2.07269	3.98209	1.99353	0.0892741	0.614645
ENSMUSG00000082676	Gm11843	predicted gene 11843	13.7196	0.491408	9.86961	3.30299	0.0892286	0.614645
ENSMUSG00000044716	Dok7	docking protein 7	39.7754	17.0197	2.26282	1.17812	0.0891929	0.614645
ENSMUSG00000032184	Lysmd2	LysM, putative peptidoglycan-binding, domain containing 2	63.5466	16.2341	3.74529	1.90508	0.0893227	0.61472
ENSMUSG00000034063	4930590J08Rik	RIKEN cDNA 4930590J08 gene	6.35145	0	7.35145	2.87803	0.0895759	0.615275
ENSMUSG00000042873	Lhfpl4	lipoma HMGIC fusion partner-like protein 4	34.653	4.88299	6.06036	2.5994	0.0895826	0.615275
ENSMUSG00000021876	Rnase4	ribonuclease, RNase A family 4	391.854	227.345	1.72044	0.782775	0.0897109	0.615714
ENSMUSG00000038578	Susd1	sushi domain containing 1	195.698	113.575	1.71676	0.779689	0.0899061	0.616264
ENSMUSG00000025068	Gsto1	glutathione S-transferase omega 1	496.668	316.828	1.56584	0.646938	0.09002	0.61684
ENSMUSG00000033006	Sox10	SRY (sex determining region Y)-box 10	20.0132	4.09235	4.12642	2.04489	0.0901375	0.617029
ENSMUSG00000035799	Twist1	twist basic helix-loop-helix transcription factor 1	21.3645	4.36432	4.16913	2.05975	0.0904597	0.618822
ENSMUSG00000026787	Gad2	glutamic acid decarboxylase 2	13.5459	2.37242	4.31319	2.10876	0.0906264	0.618907
ENSMUSG00000029636	Wasf3	WAS protein family, member 3	190.737	105.734	1.79639	0.845102	0.0906524	0.618907
ENSMUSG00000066357	Wdr6	WD repeat domain 6	508.013	303.479	1.67175	0.741359	0.0906197	0.618907
ENSMUSG00000070605	Zfp992	zinc finger protein 992	37.9929	11.3787	3.15	1.65535	0.0907844	0.618964
ENSMUSG00000015932	Dstn	destrin	5546.29	3123.25	1.77556	0.828275	0.0908732	0.618978
ENSMUSG00000036528	Ppfibp2	PTPRF interacting protein, binding protein 2 (liprin beta 2)	578.078	309.6	1.86439	0.898702	0.0908549	0.618978
ENSMUSG00000020037	Rfx4	regulatory factor X, 4 (influences HLA class II expression)	6.29354	0	7.29354	2.86662	0.0909145	0.619022
ENSMUSG00000028270	Gbp2	guanylate binding protein 2	4442.2	266.068	16.637	4.05632	0.0910649	0.619022
ENSMUSG00000043017	Ptgir	prostaglandin I receptor (IP)	153.554	34.2729	4.38168	2.13148	0.0909869	0.619022
ENSMUSG00000041702	Btbd7	BTB (POZ) domain containing 7	1421.93	849.34	1.67337	0.742757	0.0911687	0.619107
ENSMUSG00000022893	Adamts1	a disintegrin-like and metallopeptidase (reprolysin type) with thrombospondin type 1 motif, 1	5148.1	1676.63	3.06927	1.6179	0.0913432	0.619107
ENSMUSG00000049241	Hcar1	hydrocarboxylic acid receptor 1	34.7109	4.51402	6.47639	2.69519	0.0912558	0.619107
ENSMUSG00000040424	Hipk4	homeodomain interacting protein kinase 4	16.6219	4.78648	3.04535	1.60661	0.0913153	0.619107
ENSMUSG00000049184	Purg	purine-rich element binding protein G	157.885	93.5865	1.67979	0.74828	0.091312	0.619107
ENSMUSG00000036151	Tm6sf2	transmembrane 6 superfamily member 2	32.684	12.18	2.55568	1.35371	0.0911383	0.619107
ENSMUSG00000005417	Mprip	myosin phosphatase Rho interacting protein	6313.15	4004.01	1.57656	0.656784	0.0917042	0.620533
ENSMUSG00000029321	Slc10a6	solute carrier family 10 (sodium/bile acid cotransporter family), member 6	114.744	57.5507	1.97682	0.983185	0.0917953	0.620945
ENSMUSG00000029094	Afap1	actin filament associated protein 1	1405.18	818.438	1.71602	0.77907	0.0919103	0.621315
ENSMUSG00000050014	Apol10b	apolipoprotein L 10B	124.731	10.8868	10.5774	3.40292	0.0921087	0.622247
ENSMUSG00000021703	Serinc5	serine incorporator 5	279.245	166.807	1.67004	0.739887	0.0921979	0.622307
ENSMUSG00000047033	Pcdhb15	protocadherin beta 15	35.9851	4.09202	7.26334	2.86063	0.0921926	0.622307
ENSMUSG00000026727	Rsu1	Ras suppressor protein 1	939.687	564.031	1.66484	0.735385	0.092374	0.623049
ENSMUSG00000054808	Actn4	actinin alpha 4	9032.45	5764.43	1.56683	0.647849	0.0923936	0.623049
ENSMUSG00000029641	Rasl11a	RAS-like, family 11, member A	332.843	55.7463	5.88307	2.55657	0.0926883	0.62432
ENSMUSG00000022586	Ly6i	lymphocyte antigen 6 complex, locus I	13.1727	2.86349	3.66835	1.87513	0.0927904	0.624394
ENSMUSG00000002831	Plin4	perilipin 4	653.741	67.1355	9.6094	3.26445	0.0927307	0.624394
ENSMUSG00000032340	Neo1	neogenin	1263.11	766.371	1.64733	0.720132	0.0929028	0.624808
ENSMUSG00000029033	Acap3	ArfGAP with coiled-coil, ankyrin repeat and PH domains 3	276.24	156.851	1.75634	0.812574	0.0931455	0.625366
ENSMUSG00000036377	C530008M17Rik	RIKEN cDNA C530008M17 gene	86.4941	9.11349	8.65123	3.11291	0.0933121	0.625366
ENSMUSG00000037410	Tbc1d2b	TBC1 domain family, member 2B	843.18	502.081	1.67802	0.74676	0.0933577	0.625366
ENSMUSG00000058881	Zfp516	zinc finger protein 516	795.418	485.583	1.63676	0.71084	0.0935057	0.625732
ENSMUSG00000024803	Ankrd1	ankyrin repeat domain 1 (cardiac muscle)	127.737	33.9819	3.68009	1.87974	0.0934809	0.625732
ENSMUSG00000028909	Ptpru	protein tyrosine phosphatase, receptor type, U	1167.67	499.897	2.33314	1.22228	0.0934766	0.625732
ENSMUSG00000081487	Gm13689	predicted gene 13689	37.5617	11.7739	3.01879	1.59397	0.0936427	0.626241
ENSMUSG00000046191	Pcdhb20	protocadherin beta 20	50.67	17.1174	2.85196	1.51195	0.094086	0.628593
ENSMUSG00000039376	Synpo2l	synaptopodin 2-like	88.4376	21.0286	4.06006	2.0215	0.0944102	0.629407
ENSMUSG00000034422	Parp14	poly (ADP-ribose) polymerase family, member 14	5946.3	1323.85	4.48904	2.16641	0.0943459	0.629407
ENSMUSG00000068923	Syt11	synaptotagmin XI	506.417	301.132	1.67946	0.747995	0.0945011	0.629407
ENSMUSG00000036030	Prtg	protogenin	15.6437	2.26503	5.09758	2.34981	0.094544	0.629407
ENSMUSG00000023333	Gcm1	glial cells missing homolog 1 (Drosophila)	43.4564	3.60077	9.66281	3.27244	0.0944646	0.629407
ENSMUSG00000090841	Myl6	myosin, light polypeptide 6, alkali, smooth muscle and non-muscle	955.645	498.115	1.91668	0.938611	0.0953223	0.631282
[truncated: 7,222 more rows]

## Sheet: up_aged_male
Table S5 Differentially expressed genes, aged female vs. aged male mice CoRL, up in male/down in female
gene.id	gene.symbol	gene.name	Female	Male	foldChange	log2FoldChange	pval	padj
ENSMUSG00000028989	Angptl7	angiopoietin-like 7	24.3119	1264.15	0.020007	-5.64335	1.93985e-21	6.65725e-18
ENSMUSG00000028571	Cyp2j13	cytochrome P450, family 2, subfamily j, polypeptide 13	20.9141	5025.47	0.00435974	-7.84154	1.35755e-19	3.49417e-16
ENSMUSG00000041698	Slco1a1	solute carrier organic anion transporter family, member 1a1	7.74142	1575.22	0.00554582	-7.49438	1.96493e-19	4.49555e-16
ENSMUSG00000025479	Cyp2e1	cytochrome P450, family 2, subfamily e, polypeptide 1	350.148	8649.45	0.040593	-4.62263	9.58495e-18	1.97364e-14
ENSMUSG00000061906	Ugt2b38	UDP glucuronosyltransferase 2 family, polypeptide B38	185.357	4303.69	0.0432916	-4.52977	7.47647e-17	1.39953e-13
ENSMUSG00000079494	Nat8f5	N-acetyltransferase 8 (GCN5-related) family member 5	1.64739	190.596	0.0138176	-6.17735	1.05701e-15	1.81375e-12
ENSMUSG00000068086	Cyp2d9	cytochrome P450, family 2, subfamily d, polypeptide 9	29.6273	558.944	0.054697	-4.19239	5.3554e-13	7.87665e-10
ENSMUSG00000038224	Serpinf2	serine (or cysteine) peptidase inhibitor, clade F, member 2	124.758	1475.5	0.085173	-3.55346	1.13725e-11	1.46356e-08
ENSMUSG00000066071	Cyp4a12a	cytochrome P450, family 4, subfamily a, polypeptide 12a	86.147	2053.32	0.0424213	-4.55907	2.94653e-11	3.56894e-08
ENSMUSG00000041052	Slc7a13	solute carrier family 7, (cationic amino acid transporter, y+ system) member 13	20.1097	6771.04	0.00311718	-8.32554	7.8563e-11	8.98717e-08
ENSMUSG00000031725	Ces1f	carboxylesterase 1F	68.3925	4373.02	0.0158647	-5.97804	1.00863e-10	1.09309e-07
ENSMUSG00000024575	Pde6a	phosphodiesterase 6A, cGMP-specific, rod, alpha	29.2347	355.051	0.0849169	-3.5578	4.68669e-10	4.82518e-07
ENSMUSG00000078503	Zfp990	zinc finger protein 990	0	88.8366	0.0111313	-6.48923	2.09323e-09	1.7959e-06
ENSMUSG00000078597	Cyp4a12b	cytochrome P450, family 4, subfamily a, polypeptide 12B	11.2743	204.645	0.0596869	-4.06644	1.16749e-08	9.2461e-06
ENSMUSG00000040413	Timd2	T cell immunoglobulin and mucin domain containing 2	19.6271	709.759	0.0290213	-5.10675	4.29463e-08	2.85261e-05
ENSMUSG00000061959	Ces1e	carboxylesterase 1E	54.5505	658.009	0.084294	-3.56843	6.42262e-08	4.00752e-05
ENSMUSG00000030935	Acsm3	acyl-CoA synthetase medium-chain family member 3	24.6014	1252.77	0.0204195	-5.61391	1.00053e-07	5.88625e-05
ENSMUSG00000057425	Ugt2b37	UDP glucuronosyltransferase 2 family, polypeptide B37	10.0195	375.111	0.0292985	-5.09303	1.16978e-07	6.20009e-05
ENSMUSG00000030359	Pzp	pregnancy zone protein	11.8213	1491.81	0.0085887	-6.86334	1.36485e-07	6.74429e-05
ENSMUSG00000028713	Cyp4b1	cytochrome P450, family 4, subfamily b, polypeptide 1	3453.19	22960.8	0.150432	-2.73281	8.27644e-07	0.000258212
ENSMUSG00000037348	Paqr7	progestin and adipoQ receptor family member VII	89.21	509.314	0.176774	-2.50002	1.11787e-06	0.000328831
ENSMUSG00000086868	Gm15883	predicted gene 15883	10.0002	114.819	0.0949775	-3.39627	1.41109e-06	0.000403552
ENSMUSG00000032758	Kap	kidney androgen regulated protein	3252.98	59748.7	0.0544602	-4.19865	1.87512e-06	0.000470861
ENSMUSG00000028088	Fmo5	flavin containing monooxygenase 5	225.795	1238.26	0.183009	-2.45001	3.3566e-06	0.00073179
ENSMUSG00000022244	Amacr	alpha-methylacyl-CoA racemase	440.085	2158.93	0.204212	-2.29186	5.80104e-06	0.00109586
ENSMUSG00000025936	Gm4956	predicted gene 4956	2.5483	52.9879	0.065724	-3.92744	6.91734e-06	0.00124943
ENSMUSG00000052562	Slc22a30	solute carrier family 22, member 30	10.8625	1070.31	0.0110729	-6.49683	7.52775e-06	0.00132162
ENSMUSG00000026415	Fcamr	Fc receptor, IgA, IgM, high affinity	37.4652	784.99	0.0489386	-4.35288	9.19902e-06	0.0015526
ENSMUSG00000030945	Acsm2	acyl-CoA synthetase medium-chain family member 2	6219.87	35206.9	0.17669	-2.50071	1.2546e-05	0.00188565
ENSMUSG00000028836	Slc30a2	solute carrier family 30 (zinc transporter), member 2	99.5834	495.719	0.202496	-2.30404	1.35771e-05	0.00199689
ENSMUSG00000085468	Gm15343	predicted gene 15343	11.6476	112.77	0.111167	-3.16919	1.749e-05	0.00245475
ENSMUSG00000003477	Inmt	indolethylamine N-methyltransferase	129.314	3901.69	0.0333907	-4.90441	1.75246e-05	0.00245475
ENSMUSG00000024866	Acy3	aspartoacylase (aminoacylase) 3	1546.41	11836.3	0.130723	-2.93541	2.09997e-05	0.00288271
ENSMUSG00000033715	Akr1c14	aldo-keto reductase family 1, member C14	106.791	611.129	0.176091	-2.5056	2.26317e-05	0.00302604
ENSMUSG00000061825	Ces2c	carboxylesterase 2C	89.4288	421.76	0.213901	-2.22498	3.12883e-05	0.00377518
ENSMUSG00000032098	Treh	trehalase (brush-border membrane glycoprotein)	168.214	838.568	0.201549	-2.3108	3.47915e-05	0.00411719
ENSMUSG00000019787	Trdn	triadin	0	45.0107	0.0217341	-5.5239	4.27387e-05	0.0047973
ENSMUSG00000033634	Nat8f2	N-acetyltransferase 8 (GCN5-related) family member 2	87.9424	809.519	0.109735	-3.1879	7.04596e-05	0.00711193
ENSMUSG00000085826	Gm15638	predicted gene 15638	43.0509	202.074	0.21692	-2.20476	8.05888e-05	0.0079779
ENSMUSG00000074254	Cyp2a4	cytochrome P450, family 2, subfamily a, polypeptide 4	580.802	3893.67	0.149384	-2.7429	8.20102e-05	0.00804129
ENSMUSG00000034875	Nudt19	nudix (nucleoside diphosphate linked moiety X)-type motif 19	696.319	3375.67	0.206511	-2.27571	0.000101182	0.00947014
ENSMUSG00000015027	Galns	galactosamine (N-acetyl)-6-sulfate sulfatase	300.925	1125.9	0.267925	-1.9001	0.000106902	0.00991544
ENSMUSG00000029098	Acox3	acyl-Coenzyme A oxidase 3, pristanoyl	657.959	2240.29	0.294009	-1.76607	0.000127952	0.0115555
ENSMUSG00000040966	Slc22a2	solute carrier family 22 (organic cation transporter), member 2	501.019	1744.68	0.287578	-1.79797	0.000131978	0.0117533
ENSMUSG00000031844	Hsd17b2	hydroxysteroid (17-beta) dehydrogenase 2	7.86373	68.8415	0.126912	-2.9781	0.000132425	0.0117533
ENSMUSG00000074071	Fam169b	family with sequence similarity 169, member B	34.1576	161.393	0.216497	-2.20758	0.000133986	0.0118408
ENSMUSG00000058914	C1qtnf3	C1q and tumor necrosis factor related protein 3	94.622	408.893	0.233285	-2.09983	0.000135512	0.0119245
ENSMUSG00000032854	Ugt8a	UDP galactosyltransferase 8A	86.4171	1134.31	0.0769985	-3.69903	0.000139138	0.0121398
ENSMUSG00000022546	Gpt	glutamic pyruvic transaminase, soluble	75.9409	306.031	0.250596	-1.99656	0.000150342	0.013062
ENSMUSG00000032978	Guca2b	guanylate cyclase activator 2b (retina)	325.694	1134.05	0.287824	-1.79674	0.000162563	0.0138769
ENSMUSG00000022366	Slc22a22	solute carrier family 22 (organic cation transporter), member 22	83.8946	574.896	0.147413	-2.76206	0.00016973	0.0141313
ENSMUSG00000024059	Clip4	CAP-GLY domain containing linker protein family, member 4	59.6728	275.222	0.219652	-2.18671	0.000192504	0.0157073
ENSMUSG00000062152	Rpl21-ps14	ribosomal protein L21, pseudogene 14	0	21.8082	0.0438439	-4.51148	0.000269588	0.0205266
ENSMUSG00000030004	Nat8	N-acetyltransferase 8 (GCN5-related)	133.895	1001.13	0.134609	-2.89315	0.000272148	0.0205267
ENSMUSG00000075270	Pde11a	phosphodiesterase 11A	7.97954	60.677	0.14559	-2.78002	0.000317856	0.0231271
ENSMUSG00000029193	Cckar	cholecystokinin A receptor	89.5061	532.709	0.169579	-2.55997	0.000344872	0.0246571
ENSMUSG00000020777	Acox1	acyl-Coenzyme A oxidase 1, palmitoyl	4423.97	13819.8	0.320167	-1.64311	0.000371803	0.0258642
ENSMUSG00000026189	Pecr	peroxisomal trans-2-enoyl-CoA reductase	646.131	3591.94	0.180112	-2.47304	0.000375504	0.0259118
ENSMUSG00000037053	Azgp1	alpha-2-glycoprotein 1, zinc	108.277	1290.13	0.0846367	-3.56257	0.000379196	0.0259403
ENSMUSG00000090124	Ugt1a7c	UDP glucuronosyltransferase 1 family, polypeptide A7C	543.452	1825.79	0.298037	-1.74643	0.000394292	0.0266193
ENSMUSG00000052974	Cyp2f2	cytochrome P450, family 2, subfamily f, polypeptide 2	4.15709	46.7831	0.107927	-3.21187	0.000403811	0.0271728
ENSMUSG00000031958	Ldhd	lactate dehydrogenase D	1401.69	7701.17	0.182116	-2.45707	0.000410858	0.0273786
ENSMUSG00000038009	Dnajc22	DnaJ heat shock protein family (Hsp40) member C22	163.922	744.022	0.221365	-2.1755	0.00049315	0.0310689
ENSMUSG00000024650	Slc22a6	solute carrier family 22 (organic anion transporter), member 6	1792.3	7228.6	0.24805	-2.0113	0.000497924	0.0310689
ENSMUSG00000076556	Igkv4-57	immunoglobulin kappa variable 4-57	0	18.2271	0.0520098	-4.26507	0.000579267	0.0343737
ENSMUSG00000027762	Sucnr1	succinate receptor 1	35.7406	259.56	0.141006	-2.82617	0.000598784	0.0352273
ENSMUSG00000035780	Ugt2a3	UDP glucuronosyltransferase 2 family, polypeptide A3	0	19.7889	0.0481027	-4.37774	0.000603542	0.0354061
ENSMUSG00000017718	Afmid	arylformamidase	60.6253	224.272	0.273559	-1.87007	0.000659771	0.0380542
ENSMUSG00000012187	Mogat1	monoacylglycerol O-acyltransferase 1	106.662	429.891	0.249859	-2.00081	0.000670344	0.0383418
ENSMUSG00000040640	Erc2	ELKS/RAB6-interacting/CAST family member 2	227.095	822.636	0.276937	-1.85237	0.000672731	0.0383718
ENSMUSG00000022877	Hrg	histidine-rich glycoprotein	7.25236	82.8837	0.0983786	-3.34551	0.000716209	0.0400746
ENSMUSG00000053414	Hunk	hormonally upregulated Neu-associated kinase	63.624	256.282	0.25118	-1.99321	0.000734048	0.0409385
ENSMUSG00000068303	Spr-ps1	sepiapterin reductase pseudogene 1	0	19.6656	0.0483896	-4.36916	0.000748415	0.0412048
ENSMUSG00000066170	E230001N04Rik	RIKEN cDNA E230001N04 gene	10.412	71.0282	0.158438	-2.65801	0.000763652	0.0417092
ENSMUSG00000074469	Gm15348	predicted gene 15348	1.64739	39.9196	0.0646974	-3.95015	0.000800184	0.0430072
ENSMUSG00000024424	Ttc39c	tetratricopeptide repeat domain 39C	106.012	335.717	0.31781	-1.65376	0.00104303	0.0534255
ENSMUSG00000049971	Glt1d1	glycosyltransferase 1 domain containing 1	31.9826	127.968	0.255743	-1.96723	0.00105791	0.0536908
ENSMUSG00000074207	Adh1	alcohol dehydrogenase 1 (class I)	354.176	2539.24	0.13982	-2.83836	0.00106627	0.053945
ENSMUSG00000015599	Ttbk1	tau tubulin kinase 1	36.4034	140.052	0.265175	-1.91498	0.00107454	0.0542299
ENSMUSG00000020435	Osbp2	oxysterol binding protein 2	79.6475	409.51	0.196457	-2.34772	0.00108482	0.054482
ENSMUSG00000022040	Ephx2	epoxide hydrolase 2, cytoplasmic	1129.88	4514.62	0.250438	-1.99747	0.00113063	0.0562337
ENSMUSG00000055114	Anxa13	annexin A13	35.5669	274.9	0.132537	-2.91554	0.00122072	0.058185
ENSMUSG00000076530	Igkv11-106	immunoglobulin kappa variable 11-106	0.823697	25.4968	0.0688272	-3.86088	0.0013326	0.0611127
ENSMUSG00000056973	Ces1d	carboxylesterase 1D	541.046	1746.45	0.310193	-1.68876	0.00137163	0.0623472
ENSMUSG00000057074	Ces1g	carboxylesterase 1G	0.823697	47.4147	0.0376682	-4.73051	0.00140303	0.0629408
ENSMUSG00000021263	Degs2	delta(4)-desaturase, sphingolipid 2	50.6186	229.924	0.223531	-2.16145	0.00147431	0.0658516
ENSMUSG00000075705	Msrb1	methionine sulfoxide reductase B1	276.498	776.454	0.356931	-1.48628	0.00148633	0.0662445
ENSMUSG00000000049	Apoh	apolipoprotein H	1.29345	26.8285	0.0824138	-3.60097	0.0015027	0.0666129
ENSMUSG00000091813	Ces2h	carboxylesterase 2H	11.3901	62.4619	0.195238	-2.3567	0.00151846	0.0670958
ENSMUSG00000031441	Atp11a	ATPase, class VI, type 11A	3907.18	13781.6	0.283559	-1.81828	0.00154597	0.0679081
ENSMUSG00000033610	Pank1	pantothenate kinase 1	774.286	2131.68	0.363527	-1.45987	0.00157971	0.0685477
ENSMUSG00000040525	Cblc	Casitas B-lineage lymphoma c	82.1121	277.466	0.298464	-1.74437	0.00158461	0.0685477
ENSMUSG00000073633	Fbxo36	F-box protein 36	83.9976	263.851	0.320926	-1.63969	0.00162897	0.0700545
ENSMUSG00000022002	Erich6b	glutamate rich 6B	0.411848	26.3386	0.051643	-4.27528	0.00168658	0.0717527
ENSMUSG00000042410	Agps	alkylglycerone phosphate synthase	984.669	2644.62	0.372566	-1.42443	0.00181134	0.0761168
ENSMUSG00000047719	Ubiad1	UbiA prenyltransferase domain containing 1	183.896	534.708	0.345144	-1.53473	0.001979	0.0801876
ENSMUSG00000024795	Kif20b	kinesin family member 20B	58.92	210.459	0.283364	-1.81927	0.00203715	0.0813064
ENSMUSG00000016200	Syt14	synaptotagmin XIV	41.1397	145.503	0.287637	-1.79768	0.00211535	0.0832025
ENSMUSG00000047643	Gm5454	predicted gene 5454	70.4838	223.997	0.31771	-1.65422	0.00228026	0.0881304
ENSMUSG00000024039	Cbs	cystathionine beta-synthase	440.812	2467.13	0.179007	-2.48192	0.00234102	0.0889373
ENSMUSG00000020805	Slc13a5	solute carrier family 13 (sodium-dependent citrate transporter), member 5	2.11715	30.2386	0.0997852	-3.32503	0.00247159	0.0930392
ENSMUSG00000024644	Cndp2	CNDP dipeptidase 2 (metallopeptidase M20 family)	1312.92	8525.58	0.154098	-2.69808	0.00253796	0.0938227
ENSMUSG00000013997	Nit1	nitrilase 1	479.107	1313.9	0.365129	-1.45352	0.00257777	0.0951233
ENSMUSG00000024747	Aldh1a7	aldehyde dehydrogenase family 1, subfamily A7	118.445	552.025	0.215985	-2.211	0.00267309	0.0980022
ENSMUSG00000063590	Slc22a28	solute carrier family 22, member 28	49.1321	767.551	0.0652294	-3.93833	0.00269612	0.0980844
ENSMUSG00000055312	Them7	thioesterase superfamily member 7	209.277	996.437	0.210817	-2.24594	0.00291102	0.102814
ENSMUSG00000010048	Ifrd2	interferon-related developmental regulator 2	177.12	487.489	0.364635	-1.45547	0.00290216	0.102814
ENSMUSG00000042073	Abhd14b	abhydrolase domain containing 14b	880.878	2245.4	0.392573	-1.34897	0.00299021	0.104842
ENSMUSG00000035699	Slc51a	solute carrier family 51, alpha subunit	205.165	585.12	0.351744	-1.5074	0.00313374	0.107904
ENSMUSG00000038388	Mpp6	membrane protein, palmitoylated 6 (MAGUK p55 subfamily member 6)	701.891	1776.4	0.395461	-1.33839	0.00313113	0.107904
ENSMUSG00000051652	Lrrc3	leucine rich repeat containing 3	84.6669	256.561	0.332608	-1.5881	0.00318995	0.108749
ENSMUSG00000035878	Hykk	hydroxylysine kinase 1	1295.5	6366.7	0.203605	-2.29615	0.00321437	0.10904
ENSMUSG00000034871	Fam151a	family with sequence simliarity 151, member A	87.6978	257.432	0.343215	-1.54282	0.00325364	0.109868
ENSMUSG00000037139	Myom3	myomesin family, member 3	8.68742	51.8158	0.183419	-2.44679	0.00346632	0.115307
ENSMUSG00000021707	Dhfr	dihydrofolate reductase	305.61	868.047	0.352812	-1.50303	0.00357746	0.116741
ENSMUSG00000049152	Ugt3a2	UDP glycosyltransferases 3 family, polypeptide A2	1898.57	5323.8	0.356739	-1.48706	0.00360637	0.117498
ENSMUSG00000031494	Cd209a	CD209a antigen	11.5318	159.947	0.0778627	-3.68292	0.00364791	0.118477
ENSMUSG00000033386	Frrs1	ferric-chelate reductase 1	294.239	771.962	0.381958	-1.38851	0.0037135	0.120171
ENSMUSG00000028834	Trim63	tripartite motif-containing 63	24.1574	101.83	0.244651	-2.0312	0.00385505	0.123069
ENSMUSG00000022026	Olfm4	olfactomedin 4	127.563	367.221	0.349146	-1.5181	0.00391384	0.124559
ENSMUSG00000021207	Akr1c21	aldo-keto reductase family 1, member C21	1988.68	10040.8	0.198139	-2.33542	0.00406228	0.128292
ENSMUSG00000000805	Car4	carbonic anhydrase 4	795.574	2220.74	0.358536	-1.47981	0.00414378	0.130466
ENSMUSG00000027559	Car3	carbonic anhydrase 3	7.94094	105.85	0.0836778	-3.57901	0.00415964	0.130765
ENSMUSG00000085666	Gm9855	predicted pseudogene 9855	22.7675	93.3383	0.251939	-1.98885	0.00417501	0.131048
ENSMUSG00000001155	Ftcd	formiminotransferase cyclodeaminase	13.6296	329.54	0.0442597	-4.49786	0.00433769	0.133909
ENSMUSG00000020839	Tmigd1	transmembrane and immunoglobulin domain containing 1	331.576	1140.58	0.29133	-1.77928	0.00468417	0.142155
ENSMUSG00000013415	Igf2bp1	insulin-like growth factor 2 mRNA binding protein 1	8.03745	237.857	0.0378362	-4.72409	0.00471931	0.142695
ENSMUSG00000067071	Hes6	hairy and enhancer of split 6	196.284	514.032	0.383052	-1.38439	0.00474498	0.143261
ENSMUSG00000064373	Selenop	selenoprotein P	7510.01	19272.6	0.389705	-1.35954	0.00476384	0.14362
ENSMUSG00000048022	Tmem229a	transmembrane protein 229A	875.562	2241.87	0.390822	-1.35541	0.00479738	0.144419
ENSMUSG00000092488	Gm18159	predicted gene, 18159	0.823697	27.947	0.0630013	-3.98847	0.00488563	0.146647
ENSMUSG00000031445	Proz	protein Z, vitamin K-dependent plasma glycoprotein	44.5825	148.541	0.304815	-1.71399	0.00499368	0.148591
ENSMUSG00000061808	Ttr	transthyretin	141.817	393.123	0.362368	-1.46447	0.00506912	0.149969
ENSMUSG00000039648	Kyat1	kynurenine aminotransferase 1	326.292	841.371	0.388537	-1.36388	0.00512265	0.150914
ENSMUSG00000081143	Gm15823	predicted gene 15823	17.2332	68.1817	0.263556	-1.92382	0.00514504	0.150914
ENSMUSG00000026638	Irf6	interferon regulatory factor 6	291.704	747.346	0.391134	-1.35426	0.00522348	0.152563
ENSMUSG00000011179	Odc1	ornithine decarboxylase, structural 1	1524.47	3530.39	0.431973	-1.21099	0.00524555	0.152667
ENSMUSG00000030325	Klrb1c	killer cell lectin-like receptor subfamily B member 1C	0.843	59.4585	0.0304837	-5.03582	0.00523827	0.152667
ENSMUSG00000024869	Nudt8	nudix (nucleoside diphosphate linked moiety X)-type motif 8	56.5647	169.492	0.337638	-1.56645	0.00531221	0.153629
ENSMUSG00000048997	Atxn7l2	ataxin 7-like 2	100.858	274.921	0.369154	-1.4377	0.00539043	0.154588
ENSMUSG00000032066	Bco2	beta-carotene oxygenase 2	69.1325	195.31	0.357254	-1.48498	0.00537906	0.154588
ENSMUSG00000034714	Ttyh2	tweety family member 2	341.834	860.761	0.397829	-1.32978	0.00555566	0.158444
ENSMUSG00000020553	Pctp	phosphatidylcholine transfer protein	144.9	366.644	0.39685	-1.33333	0.00592767	0.166074
ENSMUSG00000019810	Fuca2	fucosidase, alpha-L- 2, plasma	1272.22	3130.93	0.406528	-1.29857	0.00597257	0.166416
ENSMUSG00000043252	Tmem64	transmembrane protein 64	570.537	1367.48	0.417645	-1.25965	0.00596551	0.166416
ENSMUSG00000068205	Macrod2	MACRO domain containing 2	418.649	1960.11	0.213985	-2.22442	0.00603855	0.167348
ENSMUSG00000037386	Rims2	regulating synaptic membrane exocytosis 2	75.6448	207.796	0.367081	-1.44583	0.00609268	0.167944
ENSMUSG00000030674	Qprt	quinolinate phosphoribosyltransferase	132.171	417.058	0.318547	-1.65042	0.00617769	0.169606
ENSMUSG00000028132	Tmem56	transmembrane protein 56	134.082	351.301	0.383428	-1.38297	0.00629716	0.170715
ENSMUSG00000026220	Slc16a14	solute carrier family 16 (monocarboxylic acid transporters), member 14	182.597	836.233	0.21929	-2.18909	0.00643666	0.172464
ENSMUSG00000055137	Sugct	succinyl-CoA glutarate-CoA transferase	265.867	815.48	0.32685	-1.6133	0.00652435	0.17357
ENSMUSG00000015568	Lpl	lipoprotein lipase	2739.33	6460.48	0.424103	-1.23751	0.00659476	0.174232
ENSMUSG00000006395	Hyi	hydroxypyruvate isomerase (putative)	134.7	350.008	0.386601	-1.37108	0.00671042	0.174508
ENSMUSG00000048534	Jaml	junction adhesion molecule like	16.6863	91.0144	0.192212	-2.37923	0.00666194	0.174508
ENSMUSG00000051147	Nat2	N-acetyltransferase 2 (arylamine N-acetyltransferase)	28.7457	126.813	0.232729	-2.10328	0.0068091	0.175773
ENSMUSG00000005980	Dnase1	deoxyribonuclease I	1415.65	4948.29	0.286233	-1.80474	0.00708576	0.179529
ENSMUSG00000023832	Acat2	acetyl-Coenzyme A acetyltransferase 2	112.441	291.521	0.387804	-1.3666	0.00710258	0.179529
ENSMUSG00000024222	Fkbp5	FK506 binding protein 5	1187.72	3041.55	0.390697	-1.35588	0.00710559	0.179529
ENSMUSG00000003526	Prodh	proline dehydrogenase	2119.54	4857.3	0.436477	-1.19602	0.00719384	0.180644
ENSMUSG00000024064	Galnt14	UDP-N-acetyl-alpha-D-galactosamine:polypeptide N-acetylgalactosaminyltransferase 14	364.878	879.945	0.415324	-1.26769	0.00727975	0.181474
ENSMUSG00000032047	Acat1	acetyl-Coenzyme A acetyltransferase 1	2527.95	5899.58	0.428594	-1.22232	0.00737619	0.18333
ENSMUSG00000006342	Susd2	sushi domain containing 2	1100.46	3156.58	0.348831	-1.5194	0.00744933	0.184806
ENSMUSG00000002769	Gnmt	glycine N-methyltransferase	44.2736	132.205	0.339879	-1.55691	0.00765025	0.188881
ENSMUSG00000038598	AI481877	expressed sequence AI481877	0	12.875	0.072072	-3.79442	0.00793369	0.193775
ENSMUSG00000048281	Dleu7	deleted in lymphocytic leukemia, 7	26.8216	174.618	0.158421	-2.65817	0.00813979	0.197184
ENSMUSG00000018474	Chd3	chromodomain helicase DNA binding protein 3	4457.66	10853.1	0.41078	-1.28356	0.00825934	0.199143
ENSMUSG00000028189	Ctbs	chitobiase, di-N-acetyl-	215.145	518.352	0.416183	-1.26471	0.00842477	0.201714
ENSMUSG00000075304	Sp5	trans-acting transcription factor 5	51.5904	192.444	0.271863	-1.87905	0.00850843	0.202824
ENSMUSG00000030498	Gas2	growth arrest specific 2	773.617	2746.79	0.281905	-1.82672	0.00852121	0.202844
ENSMUSG00000047638	Nr1h4	nuclear receptor subfamily 1, group H, member 4	557.854	1748.17	0.319498	-1.64612	0.00858836	0.204207
ENSMUSG00000051517	Arhgef39	Rho guanine nucleotide exchange factor (GEF) 39	40.8372	134.364	0.309071	-1.69399	0.00867673	0.205715
ENSMUSG00000048701	Ccdc6	coiled-coil domain containing 6	1409.35	3697.14	0.381368	-1.39074	0.00881756	0.207085
ENSMUSG00000020926	Adam11	a disintegrin and metallopeptidase domain 11	39.4215	121.52	0.329917	-1.59982	0.00882785	0.207085
ENSMUSG00000025871	4833439L19Rik	RIKEN cDNA 4833439L19 gene	3431.53	8492.7	0.404127	-1.30712	0.00882913	0.207085
ENSMUSG00000062619	2310039H08Rik	RIKEN cDNA 2310039H08 gene	57.0344	163.628	0.352519	-1.50423	0.0088301	0.207085
ENSMUSG00000037762	Slc16a9	solute carrier family 16 (monocarboxylic acid transporters), member 9	257.418	765.719	0.337044	-1.56899	0.0088747	0.207393
ENSMUSG00000006724	Cyp27b1	cytochrome P450, family 27, subfamily b, polypeptide 1	55.8826	222.066	0.255004	-1.97141	0.00889511	0.207393
ENSMUSG00000020261	Slc36a1	solute carrier family 36 (proton/amino acid symporter), member 1	482.988	1115.62	0.433438	-1.2061	0.00890472	0.207393
ENSMUSG00000079434	Neu2	neuraminidase 2	35.9594	119.872	0.305773	-1.70947	0.00915283	0.210236
ENSMUSG00000083287	Gm13502	predicted gene 13502	113.001	292.55	0.388352	-1.36456	0.00917885	0.210236
ENSMUSG00000036832	Lpar3	lysophosphatidic acid receptor 3	100.176	257.675	0.39113	-1.35428	0.00935535	0.213329
ENSMUSG00000039682	Lap3	leucine aminopeptidase 3	1260.97	3373.45	0.373977	-1.41898	0.00938563	0.213783
ENSMUSG00000056162	Cndp1	carnosine dipeptidase 1 (metallopeptidase M20 family)	168.072	1061.31	0.159155	-2.6515	0.00962798	0.216821
ENSMUSG00000028199	Cryz	crystallin, zeta	774.486	2241.96	0.345742	-1.53223	0.00963486	0.216821
ENSMUSG00000024391	Apom	apolipoprotein M	235.152	553.967	0.425524	-1.23269	0.00992632	0.221357
ENSMUSG00000030167	Klrc1	killer cell lectin-like receptor subfamily C, member 1	2.11715	84.7298	0.0363602	-4.7815	0.0100597	0.22297
ENSMUSG00000036083	Slc17a3	solute carrier family 17 (sodium phosphate), member 3	792.26	3207.31	0.247251	-2.01595	0.0100995	0.223613
ENSMUSG00000051262	Nat8f3	N-acetyltransferase 8 (GCN5-related) family member 3	5.01939	32.2578	0.180992	-2.466	0.0101999	0.225107
ENSMUSG00000044249	Defb29	defensin beta 29	67.7683	252.019	0.271791	-1.87943	0.0102785	0.226358
ENSMUSG00000000154	Slc22a18	solute carrier family 22 (organic cation transporter), member 18	671.382	1564.77	0.429427	-1.21952	0.0105557	0.229516
ENSMUSG00000030878	Cdr2	cerebellar degeneration-related 2	810.593	1788.98	0.453408	-1.14112	0.0107169	0.23184
ENSMUSG00000084353	Gm15452	predicted gene 15452	26.976	85.0811	0.324996	-1.62151	0.0107744	0.232067
ENSMUSG00000021418	Rpp40	ribonuclease P 40 subunit	43.2697	123.868	0.354532	-1.49601	0.0107651	0.232067
ENSMUSG00000046312	AI464131	expressed sequence AI464131	281.594	656.57	0.429755	-1.21841	0.0108657	0.232953
ENSMUSG00000041372	B4galnt3	beta-1,4-N-acetyl-galactosaminyl transferase 3	216.329	616.528	0.351934	-1.50662	0.0109314	0.233737
ENSMUSG00000025403	Shmt2	serine hydroxymethyltransferase 2 (mitochondrial)	842.119	2136.78	0.39439	-1.3423	0.0112294	0.238869
ENSMUSG00000028572	Hook1	hook microtubule tethering protein 1	819.177	1784.5	0.459356	-1.12232	0.0113447	0.239589
ENSMUSG00000083854	Dnajc19-ps	DnaJ heat shock protein family (Hsp40) member C19, pseudogene	233.292	535.171	0.436973	-1.19438	0.0116164	0.243794
ENSMUSG00000036330	Slc18a1	solute carrier family 18 (vesicular monoamine), member 1	572.468	1258.26	0.455401	-1.13479	0.0116652	0.244352
ENSMUSG00000005225	Plekha8	pleckstrin homology domain containing, family A (phosphoinositide binding specific) member 8	291.401	669.109	0.436349	-1.19645	0.0118347	0.245902
ENSMUSG00000041660	Bbox1	butyrobetaine (gamma), 2-oxoglutarate dioxygenase 1 (gamma-butyrobetaine hydroxylase)	12.9603	50.5963	0.270568	-1.88593	0.011989	0.247857
ENSMUSG00000006345	Ggt1	gamma-glutamyltransferase 1	3013.46	7856.54	0.383639	-1.38218	0.0122664	0.250942
ENSMUSG00000048782	Insc	inscuteable homolog (Drosophila)	10.9976	45.1261	0.260105	-1.94284	0.0122753	0.250942
ENSMUSG00000032062	2310030G06Rik	RIKEN cDNA 2310030G06 gene	124.12	304.223	0.409932	-1.28655	0.0123155	0.251092
ENSMUSG00000026664	Phyh	phytanoyl-CoA hydroxylase	2114.59	4661.86	0.453711	-1.14015	0.0124589	0.252715
ENSMUSG00000041079	Rwdd2b	RWD domain containing 2B	104.854	260.935	0.404122	-1.30714	0.0125602	0.253751
ENSMUSG00000038541	Srd5a2	steroid 5 alpha-reductase 2	7.99884	41.6389	0.211048	-2.24436	0.0126445	0.254759
ENSMUSG00000015970	Chdh	choline dehydrogenase	2548.54	6162.55	0.413648	-1.27353	0.0126652	0.254926
ENSMUSG00000028601	Echdc2	enoyl Coenzyme A hydratase domain containing 2	423.437	994.884	0.426191	-1.23043	0.0126855	0.255085
ENSMUSG00000029161	Cgref1	cell growth regulator with EF hand domain 1	819.236	1869.51	0.43851	-1.18932	0.0131092	0.260301
ENSMUSG00000035504	Reep6	receptor accessory protein 6	246.575	575.543	0.429412	-1.21957	0.0131489	0.260586
ENSMUSG00000054892	Txk	TXK tyrosine kinase	2.5676	123.862	0.0285724	-5.12924	0.0134124	0.264283
ENSMUSG00000061742	Slc22a12	solute carrier family 22 (organic anion/cation transporter), member 12	1789.68	5088.3	0.351853	-1.50696	0.0134671	0.2646
ENSMUSG00000021335	Slc17a1	solute carrier family 17 (sodium phosphate), member 1	887.384	2680.64	0.331284	-1.59386	0.0135466	0.264899
ENSMUSG00000015944	Gatsl2	GATS protein-like 2	797.343	1719.21	0.464097	-1.1075	0.0135811	0.26507
ENSMUSG00000032590	Apeh	acylpeptide hydrolase	842.846	1783.65	0.472835	-1.08059	0.0136934	0.266756
ENSMUSG00000001983	Taco1	translational activator of mitochondrially encoded cytochrome c oxidase I	99.3774	246.8	0.405074	-1.30374	0.0137261	0.267027
ENSMUSG00000037280	Galnt6	UDP-N-acetyl-alpha-D-galactosamine:polypeptide N-acetylgalactosaminyltransferase 6	29.8203	138.173	0.221453	-2.17493	0.0137543	0.267184
ENSMUSG00000085523	Gm15945	predicted gene 15945	0	11.1439	0.0823461	-3.60216	0.0138592	0.268968
ENSMUSG00000045672	Col27a1	collagen, type XXVII, alpha 1	496.219	1122.91	0.4424	-1.17658	0.0138913	0.269337
ENSMUSG00000074570	Cass4	Cas scaffolding protein family member 4	14.1573	89.4706	0.167538	-2.57744	0.0139127	0.269498
ENSMUSG00000041058	Wwp1	WW domain containing E3 ubiquitin protein ligase 1	1724.48	3639.24	0.474	-1.07704	0.0140034	0.270238
ENSMUSG00000086825	Gm15675	predicted gene 15675	0	12.1578	0.0760007	-3.71784	0.0141126	0.271582
ENSMUSG00000026994	Galnt3	UDP-N-acetyl-alpha-D-galactosamine:polypeptide N-acetylgalactosaminyltransferase 3	313.577	781.186	0.402176	-1.3141	0.0141992	0.272233
ENSMUSG00000074261	Erich4	glutamate rich 4	240.017	750.428	0.320745	-1.6405	0.0141849	0.272233
ENSMUSG00000000673	Haao	3-hydroxyanthranilate 3,4-dioxygenase	283.988	976.833	0.291449	-1.77869	0.0142912	0.273246
ENSMUSG00000028792	Ak2	adenylate kinase 2	561.766	1203.07	0.467386	-1.09731	0.0143623	0.274081
ENSMUSG00000021490	Slc34a1	solute carrier family 34 (sodium phosphate), member 1	14435.6	37095.5	0.389164	-1.36155	0.014622	0.27673
ENSMUSG00000037157	Il22ra1	interleukin 22 receptor, alpha 1	13.1534	78.3677	0.178326	-2.48741	0.0146947	0.277595
ENSMUSG00000044820	AY074887	cDNA sequence AY074887	0	20.0194	0.0475752	-4.39365	0.0147733	0.278568
ENSMUSG00000030147	Clec4b1	C-type lectin domain family 4, member b1	12.4713	53.0025	0.249457	-2.00314	0.0148614	0.279717
ENSMUSG00000007034	Slc44a4	solute carrier family 44, member 4	316.666	717.587	0.44207	-1.17765	0.0149598	0.280799
ENSMUSG00000024646	Cyb5a	cytochrome b5 type A (microsomal)	1907.85	6241.49	0.305784	-1.70942	0.0150183	0.281039
ENSMUSG00000028536	2610528J11Rik	RIKEN cDNA 2610528J11 gene	96.0119	233.93	0.41294	-1.27599	0.0153131	0.285092
ENSMUSG00000055805	Fmnl1	formin-like 1	957.018	2573.48	0.372121	-1.42616	0.0154341	0.285282
ENSMUSG00000062609	Kcnj15	potassium inwardly-rectifying channel, subfamily J, member 15	6406.26	14261.4	0.449241	-1.15444	0.0156037	0.286765
ENSMUSG00000035498	Cdcp1	CUB domain containing protein 1	345.225	775.173	0.446066	-1.16467	0.0155794	0.286765
ENSMUSG00000079550	Mpp4	membrane protein, palmitoylated 4 (MAGUK p55 subfamily member 4)	3.4106	25.2745	0.167866	-2.57461	0.0156976	0.287287
ENSMUSG00000040165	Cd209c	CD209c antigen	0.411848	18.0072	0.0742797	-3.75089	0.0157404	0.287331
ENSMUSG00000082512	Gm13937	predicted gene 13937	1.25485	25.6552	0.0845932	-3.56331	0.0158576	0.288699
ENSMUSG00000029772	Ahcyl2	S-adenosylhomocysteine hydrolase-like 2	2636.31	5435.42	0.48512	-1.04359	0.0161193	0.291381
ENSMUSG00000021620	Acot12	acyl-CoA thioesterase 12	387.639	1406.77	0.276066	-1.85691	0.0161609	0.291647
ENSMUSG00000063931	Pepd	peptidase D	1177.76	2934.66	0.40153	-1.31642	0.0162777	0.292071
ENSMUSG00000086156	Gm15354	predicted gene 15354	0.823697	40.4008	0.0440498	-4.50472	0.0162678	0.292071
ENSMUSG00000078650	G6pc	glucose-6-phosphatase, catalytic	1720.73	4458.34	0.386095	-1.37297	0.0162981	0.292074
ENSMUSG00000050164	Mchr1	melanin-concentrating hormone receptor 1	2.05924	19.8201	0.146937	-2.76673	0.0163642	0.29275
ENSMUSG00000030283	St8sia1	ST8 alpha-N-acetyl-neuraminide alpha-2,8-sialyltransferase 1	575.66	1855.04	0.310693	-1.68644	0.0163578	0.29275
ENSMUSG00000031647	Mfap3l	microfibrillar-associated protein 3-like	1152.61	2561.76	0.450143	-1.15155	0.0164401	0.293053
ENSMUSG00000030244	Gys2	glycogen synthase 2	57.0409	264.576	0.218547	-2.19398	0.0166805	0.295329
ENSMUSG00000029695	Aass	aminoadipate-semialdehyde synthase	1348.13	3830.81	0.352088	-1.50599	0.016743	0.295674
ENSMUSG00000017453	Pipox	pipecolic acid oxidase	724.176	2375.83	0.305103	-1.71263	0.0168871	0.296945
ENSMUSG00000060002	Chpt1	choline phosphotransferase 1	4321.75	8897.75	0.48577	-1.04165	0.0170216	0.298037
ENSMUSG00000027610	Gss	glutathione synthetase	735.007	2163.58	0.340024	-1.55629	0.017277	0.300238
ENSMUSG00000085465	Gm15347	predicted gene 15347	16.3902	57.9701	0.294899	-1.76171	0.0172914	0.300238
ENSMUSG00000036820	Amdhd2	amidohydrolase domain containing 2	232.835	581.45	0.401469	-1.31664	0.0174462	0.301387
ENSMUSG00000038843	Gcnt1	glucosaminyl (N-acetyl) transferase 1, core 2	2260.96	4800.95	0.47105	-1.08605	0.0175119	0.302
ENSMUSG00000021509	Slc25a48	solute carrier family 25, member 48	198.98	437.971	0.455566	-1.13427	0.0177737	0.304826
ENSMUSG00000070044	Fam149a	family with sequence similarity 149, member A	513.902	1086.11	0.473644	-1.07813	0.01775	0.304826
ENSMUSG00000032418	Me1	malic enzyme 1, NADP(+)-dependent, cytosolic	477.125	1879.89	0.254202	-1.97595	0.0178264	0.305364
ENSMUSG00000001755	Coasy	Coenzyme A synthase	728.269	1637.1	0.445191	-1.1675	0.0179125	0.306088
ENSMUSG00000020733	Slc9a3r1	solute carrier family 9 (sodium/hydrogen exchanger), member 3 regulator 1	2005.32	4242.28	0.472822	-1.08063	0.0181704	0.307434
ENSMUSG00000037686	Aspg	asparaginase	49.6984	160.891	0.313164	-1.67501	0.0183077	0.30849
ENSMUSG00000085538	Gm11455	predicted gene 11455	0	11.6662	0.0789503	-3.66291	0.0182992	0.30849
ENSMUSG00000028194	Ddah1	dimethylarginine dimethylaminohydrolase 1	1435.59	3957.04	0.362954	-1.46214	0.0183239	0.30851
ENSMUSG00000089678	Agxt2	alanine-glyoxylate aminotransferase 2	305.449	1048.97	0.291865	-1.77663	0.0184577	0.310509
ENSMUSG00000064254	Ethe1	ethylmalonic encephalopathy 1	263.82	581.371	0.454728	-1.13692	0.0185451	0.311632
ENSMUSG00000034926	Dhcr24	24-dehydrocholesterol reductase	1744.56	3681.8	0.473976	-1.07711	0.0187015	0.312964
ENSMUSG00000039886	Tmem120a	transmembrane protein 120A	308.191	651.604	0.47378	-1.07771	0.0187161	0.312964
ENSMUSG00000079298	Klrb1b	killer cell lectin-like receptor subfamily B member 1B	6.64748	57.4243	0.130896	-2.93351	0.0189769	0.315633
ENSMUSG00000082082	Gm13230	predicted gene 13230	0	10.2572	0.0888319	-3.49278	0.0191124	0.317325
ENSMUSG00000019987	Arg1	arginase, liver	7.09794	33.6547	0.233675	-2.09742	0.0191593	0.317384
ENSMUSG00000024697	Gna14	guanine nucleotide binding protein, alpha 14	74.879	172.895	0.43635	-1.19644	0.0192035	0.317784
ENSMUSG00000021238	Aldh6a1	aldehyde dehydrogenase family 6, subfamily A1	3817.78	8033.83	0.475278	-1.07316	0.0192686	0.318427
ENSMUSG00000019996	Map7	microtubule-associated protein 7	1363.72	3597.04	0.379296	-1.3986	0.0193936	0.319978
ENSMUSG00000029776	Hibadh	3-hydroxyisobutyrate dehydrogenase	1018.58	2070.04	0.492304	-1.02238	0.0195026	0.320493
ENSMUSG00000038422	Hdhd3	haloacid dehalogenase-like hydrolase domain containing 3	35.4125	104.955	0.343661	-1.54094	0.0195784	0.321483
ENSMUSG00000038641	Akr1d1	aldo-keto reductase family 1, member D1	69.5701	288.944	0.243392	-2.03865	0.0197452	0.323042
ENSMUSG00000017493	Igfbp4	insulin-like growth factor binding protein 4	4272.78	8866.95	0.481935	-1.05309	0.0197836	0.323304
ENSMUSG00000042082	Arsb	arylsulfatase B	924.9	1977.44	0.467994	-1.09544	0.019997	0.32595
ENSMUSG00000063730	Hsd3b2	hydroxy-delta-5-steroid dehydrogenase, 3 beta- and steroid delta-isomerase 2	197.854	1677.02	0.118505	-3.07698	0.0200088	0.32595
ENSMUSG00000029053	Prkcz	protein kinase C, zeta	288.087	605.635	0.476542	-1.06932	0.0200514	0.326386
ENSMUSG00000036322	H2-Ea-ps	histocompatibility 2, class II antigen E alpha, pseudogene	232.822	794.661	0.293871	-1.76675	0.0201122	0.327118
ENSMUSG00000028167	Bdh2	3-hydroxybutyrate dehydrogenase, type 2	524.237	1726.94	0.303967	-1.71801	0.0202645	0.329334
ENSMUSG00000029735	Tpk1	thiamine pyrophosphokinase	233.389	506.755	0.461617	-1.11523	0.020308	0.329521
ENSMUSG00000028085	Gatb	glutamyl-tRNA(Gln) amidotransferase, subunit B	316.305	689.03	0.459843	-1.12079	0.0205159	0.331067
ENSMUSG00000037366	Pafah2	platelet-activating factor acetylhydrolase 2	439.692	907.069	0.485307	-1.04303	0.0207758	0.333693
ENSMUSG00000015536	Mocs2	molybdenum cofactor synthesis 2	341.634	714.568	0.478828	-1.06242	0.0208603	0.334789
ENSMUSG00000025731	Mettl26	methyltransferase like 26	481.894	1013.22	0.476122	-1.0706	0.0209526	0.335601
ENSMUSG00000025199	Chuk	conserved helix-loop-helix ubiquitous kinase	1022.15	2050.08	0.498833	-1.00337	0.0212338	0.339461
ENSMUSG00000040055	Gjb6	gap junction protein, beta 6	15.0196	51.4945	0.305167	-1.71233	0.0214385	0.340695
ENSMUSG00000034285	Nipsnap1	nipsnap homolog 1	461.276	1150.33	0.401514	-1.31648	0.0215371	0.340869
ENSMUSG00000090486	BC035947	cDNA sequence BC035947	172.056	645.454	0.2677	-1.90131	0.0215863	0.340951
ENSMUSG00000048251	Bcl11b	B cell leukemia/lymphoma 11B	104.526	706.172	0.149222	-2.74447	0.0216883	0.34221
ENSMUSG00000000869	Il4	interleukin 4	0.823697	18.883	0.0917216	-3.44659	0.0218325	0.343249
ENSMUSG00000083500	Gm15470	predicted gene 15470	59.2674	137.88	0.433952	-1.20439	0.0218414	0.343249
ENSMUSG00000002297	Dbf4	DBF4 zinc finger	54.0678	139.177	0.392845	-1.34797	0.0219127	0.343644
ENSMUSG00000037780	Mbl1	mannose-binding lectin (protein A) 1	6.29354	38.0665	0.186696	-2.42124	0.0221232	0.345891
ENSMUSG00000045374	Wdr81	WD repeat domain 81	834.667	1820.6	0.458755	-1.1242	0.0224892	0.349869
ENSMUSG00000018459	Slc13a3	solute carrier family 13 (sodium-dependent dicarboxylate transporter), member 3	2814.28	6247.51	0.450553	-1.15023	0.0226093	0.351357
ENSMUSG00000055435	Maf	avian musculoaponeurotic fibrosarcoma oncogene homolog	2940.39	7997.86	0.367726	-1.4433	0.0227775	0.353172
ENSMUSG00000090061	Nwd2	NACHT and WD repeat domain containing 2	9.21509	37.8546	0.262906	-1.92738	0.0228422	0.353908
ENSMUSG00000059040	Eno1b	enolase 1B, retrotransposed	299.735	650.656	0.461493	-1.11562	0.0229171	0.354003
ENSMUSG00000019894	Slc6a15	solute carrier family 6 (neurotransmitter transporter), member 15	55.3291	198.57	0.282253	-1.82494	0.0230688	0.356018
ENSMUSG00000022210	Dhrs4	dehydrogenase/reductase (SDR family) member 4	727.323	1786.89	0.407364	-1.29561	0.0231091	0.356072
ENSMUSG00000024921	Smarca2	SWI/SNF related, matrix associated, actin dependent regulator of chromatin, subfamily a, member 2	4884.92	9818.39	0.497579	-1.007	0.023189	0.356598
ENSMUSG00000033257	Ttll4	tubulin tyrosine ligase-like family, member 4	582.461	1183.02	0.49278	-1.02099	0.0237839	0.360895
ENSMUSG00000089712	Gm15889	predicted gene 15889	12.8059	48.054	0.281443	-1.82908	0.023909	0.361986
ENSMUSG00000076909	Traj20	T cell receptor alpha joining 20	0	10.3415	0.0881717	-3.50354	0.0241071	0.363123
ENSMUSG00000020042	Btbd11	BTB (POZ) domain containing 11	135.652	294.886	0.46184	-1.11453	0.0241501	0.363505
ENSMUSG00000030688	Stard10	START domain containing 10	1604.17	3546.08	0.452533	-1.14391	0.0243884	0.36574
ENSMUSG00000086390	1810019D21Rik	RIKEN cDNA 1810019D21 gene	106.121	248.412	0.429495	-1.21929	0.0244957	0.366001
ENSMUSG00000053279	Aldh1a1	aldehyde dehydrogenase family 1, subfamily A1	450.742	986.153	0.457621	-1.12778	0.0245475	0.366008
ENSMUSG00000055850	Rnf181	ring finger protein 181	958.446	2200.61	0.435794	-1.19828	0.0245446	0.366008
ENSMUSG00000068877	Selenbp2	selenium binding protein 2	89.7249	270.814	0.333776	-1.58305	0.0250087	0.369462
ENSMUSG00000052520	Cyp2j5	cytochrome P450, family 2, subfamily j, polypeptide 5	5772.28	12811.6	0.450593	-1.1501	0.0250124	0.369462
ENSMUSG00000078350	Smim1	small integral membrane protein 1	278.628	573.203	0.486984	-1.03805	0.0250028	0.369462
ENSMUSG00000029311	Hsd17b11	hydroxysteroid (17-beta) dehydrogenase 11	983.813	2121.42	0.464005	-1.10779	0.0249921	0.369462
ENSMUSG00000029273	Sult1d1	sulfotransferase family 1D, member 1	2498.02	5080.89	0.491751	-1.024	0.0251372	0.370774
ENSMUSG00000010025	Aldh3a2	aldehyde dehydrogenase family 3, subfamily A2	943.903	2814.41	0.335618	-1.57511	0.0251891	0.370912
ENSMUSG00000046603	Tcaim	T cell activation inhibitor, mitochondrial	222.069	688.261	0.323636	-1.62756	0.0251739	0.370912
ENSMUSG00000037443	Cep85	centrosomal protein 85	338.448	727.498	0.465957	-1.10173	0.0252335	0.371044
ENSMUSG00000010122	Slc47a1	solute carrier family 47, member 1	1621.41	5136.49	0.315797	-1.66293	0.0253085	0.371438
ENSMUSG00000076757	Tcrg-C4	T cell receptor gamma, constant 4	0.411848	27.8839	0.0488801	-4.35461	0.0253407	0.371645
ENSMUSG00000015962	1700016C15Rik	RIKEN cDNA 1700016C15 gene	66.2174	250.148	0.26764	-1.90163	0.0253845	0.371758
ENSMUSG00000029804	Herc3	hect domain and RLD 3	495.118	1023.93	0.484051	-1.04677	0.0254173	0.371974
ENSMUSG00000048087	Gm4737	predicted gene 4737	317.67	696.827	0.45666	-1.13081	0.0255612	0.372818
ENSMUSG00000066839	Ecsit	ECSIT signalling integrator	272.675	590.607	0.462596	-1.11218	0.0256987	0.374495
ENSMUSG00000022066	Entpd4b	ectonucleoside triphosphate diphosphohydrolase 4B	504.667	1051.07	0.480642	-1.05697	0.0258084	0.375298
ENSMUSG00000027332	Ivd	isovaleryl coenzyme A dehydrogenase	1843.8	3858.25	0.478019	-1.06486	0.0259871	0.377096
ENSMUSG00000034709	Ppp1r21	protein phosphatase 1, regulatory subunit 21	655.751	1301.9	0.504069	-0.988306	0.0260425	0.377635
ENSMUSG00000032560	Dnajc13	DnaJ heat shock protein family (Hsp40) member C13	3250.72	6259.05	0.51944	-0.944972	0.0262378	0.37841
ENSMUSG00000025903	Lypla1	lysophospholipase 1	758.932	1654.67	0.458989	-1.12347	0.0269436	0.379724
ENSMUSG00000026123	Plekhb2	pleckstrin homology domain containing, family B (evectins) member 2	1669.51	3278.06	0.509449	-0.97299	0.0266959	0.379724
ENSMUSG00000022751	Nit2	nitrilase family, member 2	191.007	580.771	0.330039	-1.59929	0.0269714	0.379724
ENSMUSG00000024386	Proc	protein C	520.086	1353.36	0.384749	-1.37801	0.0267634	0.379724
ENSMUSG00000035637	Grhpr	glyoxylate reductase/hydroxypyruvate reductase	428.92	1010.25	0.425136	-1.23401	0.0267223	0.379724
ENSMUSG00000057977	Skint11	selection and upkeep of intraepithelial T cells 11	0	9.61594	0.0941979	-3.40816	0.026798	0.379724
ENSMUSG00000048215	A630023P12Rik	RIKEN cDNA A630023P12 gene	0	18.9947	0.0500133	-4.32154	0.0268957	0.379724
ENSMUSG00000026573	Xcl1	chemokine (C motif) ligand 1	5.41194	125.876	0.0505369	-4.30652	0.0270607	0.380606
ENSMUSG00000018677	Slc25a39	solute carrier family 25, member 39	2153.63	4243.06	0.507682	-0.978002	0.0270916	0.38076
ENSMUSG00000076906	Traj23	T cell receptor alpha joining 23	0	9.33193	0.0967874	-3.36904	0.0271371	0.3809
ENSMUSG00000021306	Gpr137b	G protein-coupled receptor 137B	599.688	1194.79	0.502338	-0.99327	0.0274571	0.382657
ENSMUSG00000027887	Sypl2	synaptophysin-like 2	145.588	525.649	0.278341	-1.84507	0.0275047	0.382657
ENSMUSG00000031938	4931406C07Rik	RIKEN cDNA 4931406C07 gene	3168.42	8702.33	0.364162	-1.45735	0.0274475	0.382657
ENSMUSG00000026594	Ralgps2	Ral GEF with PH domain and SH3 binding motif 2	171.625	493.538	0.349062	-1.51844	0.0277127	0.383992
ENSMUSG00000058809	Hspd1-ps3	heat shock protein 1 (chaperonin), pseudogene 3	1310.2	2539.04	0.516213	-0.953962	0.0277304	0.383992
ENSMUSG00000052566	Hook2	hook microtubule tethering protein 2	505.536	1476.99	0.34272	-1.5449	0.0279872	0.386767
ENSMUSG00000017929	B4galt5	UDP-Gal:betaGlcNAc beta 1,4-galactosyltransferase, polypeptide 5	1063.29	2177.32	0.488582	-1.03333	0.0282692	0.388319
ENSMUSG00000034813	Grip1	glutamate receptor interacting protein 1	42.7227	109.149	0.396942	-1.333	0.0284075	0.38944
ENSMUSG00000082308	Gm15770	predicted gene 15770	49.0163	116.045	0.427325	-1.22659	0.0287225	0.392451
ENSMUSG00000084403	Rps15a-ps8	ribosomal protein S15A, pseudogene 8	0	13.5902	0.0685392	-3.86693	0.0287586	0.392684
ENSMUSG00000022847	Thpo	thrombopoietin	37.6583	97.4716	0.392583	-1.34893	0.0289161	0.39301
ENSMUSG00000058216	Gstp3	glutathione S-transferase pi 3	4.11848	24.0919	0.203989	-2.29344	0.0289658	0.393168
ENSMUSG00000047986	Palm3	paralemmin 3	114.127	315.779	0.363429	-1.46026	0.0290052	0.393442
ENSMUSG00000029822	Osbpl3	oxysterol binding protein-like 3	1130.42	2542.74	0.444788	-1.16881	0.0290532	0.393835
ENSMUSG00000055675	Kbtbd11	kelch repeat and BTB (POZ) domain containing 11	588.176	1171.78	0.502376	-0.993161	0.0291115	0.393958
ENSMUSG00000025937	Lactb2	lactamase, beta 2	2403.16	7592.34	0.316614	-1.6592	0.0293246	0.394096
ENSMUSG00000055170	Ifng	interferon gamma	8.35279	165.869	0.0560486	-4.15718	0.02941	0.394096
ENSMUSG00000054003	Tdrd9	tudor domain containing 9	0.823697	17.9428	0.0962739	-3.37671	0.0293378	0.394096
ENSMUSG00000013539	Tango2	transport and golgi organization 2	331.267	723.323	0.458728	-1.12429	0.0293945	0.394096
ENSMUSG00000063851	Rnf183	ring finger protein 183	171.683	376.787	0.457089	-1.12945	0.0292473	0.394096
ENSMUSG00000058446	Znrf2	zinc and ring finger 2	839.164	1649.79	0.508946	-0.974417	0.0292547	0.394096
ENSMUSG00000069094	Pde7a	phosphodiesterase 7A	417.967	928.179	0.4509	-1.14912	0.0296374	0.395761
ENSMUSG00000036764	Dnajc12	DnaJ heat shock protein family (Hsp40) member C12	293.171	786.933	0.373346	-1.42142	0.0297487	0.396219
ENSMUSG00000084241	Gm13416	predicted gene 13416	107.518	225.778	0.47852	-1.06335	0.0298035	0.396436
ENSMUSG00000033676	Gabrb3	gamma-aminobutyric acid (GABA) A receptor, subunit beta 3	115.156	251.974	0.459164	-1.12292	0.0298697	0.396804
ENSMUSG00000038550	Ciart	circadian associated repressor of transcription	53.122	128.52	0.417866	-1.25889	0.0300083	0.398131
ENSMUSG00000046959	Slc26a1	solute carrier family 26 (sulfate transporter), member 1	601.658	1728.36	0.348486	-1.52083	0.0299942	0.398131
ENSMUSG00000032688	Malt1	MALT1 paracaspase	520.015	1002.92	0.51898	-0.946248	0.030108	0.398384
ENSMUSG00000025980	Hspd1	heat shock protein 1 (chaperonin)	1470.73	2852.11	0.515835	-0.955018	0.0304414	0.39976
ENSMUSG00000020623	Map2k6	mitogen-activated protein kinase kinase 6	137.351	322.132	0.428156	-1.22379	0.0304497	0.39976
ENSMUSG00000020258	Glyctk	glycerate kinase	178.787	723.293	0.248224	-2.01028	0.0304897	0.399882
ENSMUSG00000022041	Chrna2	cholinergic receptor, nicotinic, alpha polypeptide 2 (neuronal)	11.6283	43.27	0.285256	-1.80967	0.0305333	0.399943
ENSMUSG00000050107	Haspin	histone H3 associated protein kinase	23.5075	67.5628	0.357446	-1.4842	0.0308155	0.401603
ENSMUSG00000022389	Tef	thyrotroph embryonic factor	1508.59	3568.92	0.422864	-1.24173	0.031122	0.404822
ENSMUSG00000053101	Gpr141	G protein-coupled receptor 141	16.7249	55.4887	0.313778	-1.67219	0.0314568	0.407375
ENSMUSG00000000247	Lhx2	LIM homeobox protein 2	0	8.59515	0.104219	-3.2623	0.0315727	0.408362
ENSMUSG00000046687	Gm5424	predicted gene 5424	10538.6	32362.2	0.325667	-1.61853	0.0316465	0.408804
ENSMUSG00000002944	Cd36	CD36 antigen	991.722	1988.6	0.498956	-1.00301	0.0317096	0.409106
ENSMUSG00000036875	Dna2	DNA replication helicase/nuclease 2	87.7815	191.258	0.461782	-1.11472	0.0319294	0.409852
ENSMUSG00000041644	Slc5a12	solute carrier family 5 (sodium/glucose cotransporter), member 12	2091.88	4461.22	0.469021	-1.09228	0.0322657	0.411588
ENSMUSG00000049799	Lrrc19	leucine rich repeat containing 19	707.992	1371.93	0.516409	-0.953413	0.0323218	0.411588
ENSMUSG00000042978	Sbk1	SH3-binding kinase 1	428.534	831.759	0.515796	-0.955127	0.0323081	0.411588
ENSMUSG00000001436	Slc19a1	solute carrier family 19 (folate transporter), member 1	279.265	578.614	0.483537	-1.0483	0.0325694	0.413069
ENSMUSG00000037601	Nme1	NME/NM23 nucleoside diphosphate kinase 1	144.005	313.151	0.461578	-1.11536	0.0326274	0.413202
ENSMUSG00000025176	Hoga1	4-hydroxy-2-oxoglutarate aldolase 1	394.087	1216.39	0.324536	-1.62355	0.0326291	0.413202
ENSMUSG00000022763	Aifm3	apoptosis-inducing factor, mitochondrion-associated 3	26.2746	193.16	0.140475	-2.83162	0.0329606	0.415611
ENSMUSG00000038704	Aspdh	aspartate dehydrogenase domain containing	120.736	487.268	0.249322	-2.00392	0.0331094	0.41685
ENSMUSG00000025243	Slc6a20b	solute carrier family 6 (neurotransmitter transporter), member 20B	595.036	1488.27	0.40022	-1.32113	0.033487	0.418151
ENSMUSG00000015474	Ppt2	palmitoyl-protein thioesterase 2	173.027	376.042	0.461559	-1.11541	0.0336225	0.418296
ENSMUSG00000073563	Csnk1g3	casein kinase 1, gamma 3	617.147	1182.8	0.522174	-0.937398	0.0336539	0.418296
ENSMUSG00000028743	Akr7a5	aldo-keto reductase family 7, member A5 (aflatoxin aldehyde reductase)	904.244	2194.51	0.412316	-1.27818	0.0336127	0.418296
ENSMUSG00000029136	Rbks	ribokinase	56.0498	131.081	0.431931	-1.21113	0.0339116	0.419296
ENSMUSG00000086706	Gm15848	predicted gene 15848	62.8968	214.438	0.29659	-1.75346	0.0341195	0.420416
ENSMUSG00000076922	Traj6	T cell receptor alpha joining 6	0	16.4841	0.0571948	-4.12797	0.0341992	0.420416
ENSMUSG00000074892	B3galt5	UDP-Gal:betaGlcNAc beta 1,3-galactosyltransferase, polypeptide 5	144.951	420.644	0.346148	-1.53054	0.0341173	0.420416
ENSMUSG00000039438	Ttc36	tetratricopeptide repeat domain 36	964.625	2892.13	0.333765	-1.5831	0.0341664	0.420416
ENSMUSG00000084854	Gm12678	predicted gene 12678	53.862	208.549	0.26181	-1.93341	0.0343102	0.421529
ENSMUSG00000001444	Tbx21	T-box 21	9.44672	201.86	0.0514971	-4.27936	0.034389	0.421865
ENSMUSG00000032094	Cd3d	CD3 antigen, delta polypeptide	2.88294	73.9281	0.0518222	-4.27029	0.0345588	0.422143
ENSMUSG00000087289	4933424M12Rik	RIKEN cDNA 4933424M12 gene	0.431151	10.6412	0.122938	-3.024	0.0350592	0.42517
ENSMUSG00000027636	Sla2	Src-like-adaptor 2	8.05675	69.5816	0.128316	-2.96223	0.0353348	0.426983
ENSMUSG00000045699	Gm21411	predicted gene, 21411	0.843	13.8843	0.123822	-3.01366	0.0353597	0.427033
ENSMUSG00000025142	Aspscr1	alveolar soft part sarcoma chromosome region, candidate 1 (human)	235.905	476.543	0.496091	-1.01132	0.0357484	0.429711
ENSMUSG00000093497	Gm20713	predicted gene 20713	0.431151	10.4765	0.124703	-3.00343	0.0361068	0.431661
ENSMUSG00000060224	Pyroxd2	pyridine nucleotide-disulphide oxidoreductase domain 2	358.005	1164.99	0.307897	-1.69948	0.0361202	0.431661
ENSMUSG00000041605	5730559C18Rik	RIKEN cDNA 5730559C18 gene	57.1889	134.342	0.429939	-1.2178	0.0363307	0.431809
ENSMUSG00000047728	BC025446	cDNA sequence BC025446	95.8189	234.546	0.41104	-1.28265	0.0362549	0.431809
ENSMUSG00000028393	Alad	aminolevulinate, delta-, dehydratase	390.927	910.172	0.430135	-1.21714	0.0362321	0.431809
ENSMUSG00000068227	Il2rb	interleukin 2 receptor, beta chain	38.6622	579.935	0.0682729	-3.87254	0.0365626	0.433533
ENSMUSG00000010044	Zmynd10	zinc finger, MYND domain containing 10	84.0169	267.198	0.316993	-1.65748	0.036537	0.433533
ENSMUSG00000026068	Il18rap	interleukin 18 receptor accessory protein	30.6633	384.372	0.0821631	-3.60537	0.0370499	0.437722
ENSMUSG00000062397	Zfp706	zinc finger protein 706	914.494	1699.4	0.538399	-0.893253	0.0370526	0.437722
ENSMUSG00000040658	Dnph1	2'-deoxynucleoside 5'-phosphate N-hydrolase 1	27.9606	126.258	0.227575	-2.13559	0.0373133	0.439541
ENSMUSG00000062210	Tnfaip8	tumor necrosis factor, alpha-induced protein 8	900.042	1965.87	0.458109	-1.12624	0.0372823	0.439541
ENSMUSG00000028559	Osbpl9	oxysterol binding protein-like 9	2184.15	3924.01	0.556725	-0.844964	0.0373118	0.439541
ENSMUSG00000056204	Pgpep1	pyroglutamyl-peptidase I	373.655	876.186	0.42711	-1.22732	0.0372544	0.439541
ENSMUSG00000026012	Cd28	CD28 antigen	17.6837	350.251	0.0531919	-4.23265	0.0374296	0.439692
ENSMUSG00000041757	Plekha6	pleckstrin homology domain containing, family A member 6	2795.84	5457.71	0.512363	-0.964762	0.0374602	0.439692
ENSMUSG00000080950	Gm7278	predicted gene 7278	32.9928	84.6411	0.396922	-1.33307	0.0376803	0.439692
ENSMUSG00000024953	Prdx5	peroxiredoxin 5	3970.25	7686.44	0.516589	-0.952911	0.0377104	0.439692
ENSMUSG00000029173	Sepsecs	Sep (O-phosphoserine) tRNA:Sec (selenocysteine) tRNA synthase	329.838	679.411	0.486233	-1.04028	0.0373901	0.439692
ENSMUSG00000029482	Aacs	acetoacetyl-CoA synthetase	299.31	1356.99	0.221142	-2.17695	0.0375571	0.439692
ENSMUSG00000058492	Scp2-ps2	sterol carrier protein 2, pseudogene 2	1363.53	2906.87	0.469254	-1.09156	0.0376629	0.439692
ENSMUSG00000020702	Ccl1	chemokine (C-C motif) ligand 1	0	8.32235	0.107269	-3.22069	0.0381019	0.442076
ENSMUSG00000022856	Tmem41a	transmembrane protein 41a	58.0319	132.908	0.440838	-1.18168	0.0381296	0.442076
ENSMUSG00000015966	Il17rb	interleukin 17 receptor B	61.5648	144.949	0.428676	-1.22204	0.0382258	0.442195
ENSMUSG00000030759	Far1	fatty acyl CoA reductase 1	1216.28	2359.16	0.515761	-0.955224	0.0382186	0.442195
ENSMUSG00000031933	Izumo1r	IZUMO1 receptor, JUNO	1.23555	21.3134	0.100188	-3.31921	0.038218	0.442195
ENSMUSG00000027601	Mtfr1	mitochondrial fission regulator 1	483.785	917.033	0.52807	-0.921199	0.0383833	0.442886
ENSMUSG00000021384	Susd3	sushi domain containing 3	197.262	396.875	0.498303	-1.00491	0.0385948	0.444715
ENSMUSG00000058927	Gm10053	predicted gene 10053	489.648	959.531	0.510809	-0.969144	0.038664	0.444988
ENSMUSG00000023122	Sult1c2	sulfotransferase family, cytosolic, 1C, member 2	620.931	1832.56	0.339193	-1.55982	0.0388365	0.445754
ENSMUSG00000028636	Ppcs	phosphopantothenoylcysteine synthetase	144.192	295.49	0.489702	-1.03002	0.0390667	0.446709
ENSMUSG00000036395	Glb1l2	galactosidase, beta 1-like 2	534.9	1092.37	0.490136	-1.02875	0.0392577	0.448339
ENSMUSG00000028894	Inpp5b	inositol polyphosphate-5-phosphatase B	993.047	1824.57	0.544512	-0.876964	0.0394903	0.4495
ENSMUSG00000072575	Eddm3b	epididymal protein 3B	13.6424	56.7318	0.253628	-1.97921	0.0396336	0.450105
ENSMUSG00000025732	Mcrip2	MAPK regulated corepressor interacting protein 2	261.961	611.582	0.429267	-1.22005	0.0399154	0.450105
ENSMUSG00000002475	Abhd3	abhydrolase domain containing 3	238.994	502.093	0.477036	-1.06783	0.0398336	0.450105
ENSMUSG00000060961	Slc4a4	solute carrier family 4 (anion exchanger), member 4	10324.7	18923.7	0.54562	-0.87403	0.0397584	0.450105
ENSMUSG00000044876	Zfp444	zinc finger protein 444	294.973	566.619	0.521428	-0.939459	0.0398916	0.450105
ENSMUSG00000049091	Sephs2	selenophosphate synthetase 2	1175.21	3103.29	0.378897	-1.40012	0.0399584	0.450105
ENSMUSG00000031609	Sap30	sin3 associated polypeptide	407.414	1204.05	0.338919	-1.56099	0.0397222	0.450105
ENSMUSG00000001482	Def8	differentially expressed in FDCP 8	682.805	1668.94	0.409478	-1.28814	0.0396859	0.450105
ENSMUSG00000074217	2210011C24Rik	RIKEN cDNA 2210011C24 gene	19.4469	71.7107	0.281209	-1.83029	0.0400348	0.450366
ENSMUSG00000037710	Cisd1	CDGSH iron sulfur domain 1	858.715	1628.51	0.52759	-0.92251	0.0400967	0.450415
ENSMUSG00000074435	Smcp	sperm mitochondria-associated cysteine-rich protein	4.98079	47.4414	0.123464	-3.01783	0.0403278	0.451054
ENSMUSG00000028639	Ybx1	Y box protein 1	4573.18	8480.64	0.539304	-0.890831	0.0403218	0.451054
ENSMUSG00000024978	Gpam	glycerol-3-phosphate acyltransferase, mitochondrial	1345.91	2581.12	0.52163	-0.938902	0.0404335	0.451568
ENSMUSG00000086688	Gm11560	predicted gene 11560	963.549	1789.13	0.538814	-0.892141	0.0409326	0.451926
ENSMUSG00000053613	Notumos	notum pectinacetylesterase homolog (Drosophila), opposite strand	3.3527	21.2629	0.195513	-2.35466	0.040766	0.451926
ENSMUSG00000076755	Gm16602	T cell receptor gamma, variable 1	0	12.9907	0.0714759	-3.8064	0.0407999	0.451926
ENSMUSG00000022235	Cmbl	carboxymethylenebutenolidase-like (Pseudomonas)	576.098	1717.62	0.335791	-1.57437	0.0408246	0.451926
ENSMUSG00000042632	Pla2g6	phospholipase A2, group VI	164.649	328.234	0.503133	-0.990987	0.0409571	0.451926
ENSMUSG00000037972	Snn	stannin	478.618	924.674	0.518129	-0.948618	0.040634	0.451926
ENSMUSG00000015451	C4a	complement component 4A (Rodgers blood group)	32.967	112.843	0.298367	-1.74484	0.0409764	0.451926
ENSMUSG00000003546	Klc4	kinesin light chain 4	765.219	1447.16	0.529098	-0.918392	0.0408431	0.451926
ENSMUSG00000028919	Arhgef19	Rho guanine nucleotide exchange factor (GEF) 19	140.324	300.189	0.469221	-1.09166	0.0405736	0.451926
ENSMUSG00000086054	Hnf1aos1	HNF1 homeobox A, opposite strand 1	15.6437	61.594	0.2659	-1.91104	0.040922	0.451926
ENSMUSG00000055912	Tmem150a	transmembrane protein 150A	210.821	495.531	0.426601	-1.22904	0.0408927	0.451926
ENSMUSG00000057103	Nat8f1	N-acetyltransferase 8 (GCN5-related) family member 1	319.697	862.378	0.371444	-1.42878	0.040503	0.451926
ENSMUSG00000056290	Ms4a4b	membrane-spanning 4-domains, subfamily A, member 4B	19.6271	237.208	0.0865927	-3.52961	0.0411046	0.45237
ENSMUSG00000029556	Hnf1a	HNF1 homeobox A	343.037	830.264	0.413872	-1.27274	0.0412978	0.45341
ENSMUSG00000079263	Gm6614	predicted gene 6614	0.411848	10.7754	0.119898	-3.06012	0.0413092	0.45341
ENSMUSG00000020709	Adap2	ArfGAP with dual PH domains 2	726.223	1352.46	0.537307	-0.896181	0.0416326	0.45502
ENSMUSG00000021474	Sfxn1	sideroflexin 1	1279.64	2884.22	0.443863	-1.17181	0.0419583	0.4552
ENSMUSG00000027863	Cd2	CD2 antigen	32.4844	459.928	0.0726457	-3.78298	0.0417013	0.4552
ENSMUSG00000030154	Klrb1f	killer cell lectin-like receptor subfamily B member 1F	0.411848	36.6538	0.0374955	-4.73714	0.0418201	0.4552
ENSMUSG00000037337	Map4k1	mitogen-activated protein kinase kinase kinase kinase 1	36.159	140.663	0.262306	-1.93068	0.0417472	0.4552
ENSMUSG00000014418	Hps5	HPS5, biogenesis of lysosomal organelles complex 2 subunit 2	895.659	1673.03	0.535627	-0.900699	0.0419295	0.4552
ENSMUSG00000034424	Gcsh	glycine cleavage system protein H (aminomethyl carrier)	341.679	763.325	0.448342	-1.15733	0.041883	0.4552
ENSMUSG00000030775	Trat1	T cell receptor associated transmembrane adaptor 1	0.862302	21.3398	0.0833624	-3.58446	0.0420847	0.455848
ENSMUSG00000089827	1700023H06Rik	RIKEN cDNA 1700023H06 gene	88.7789	190.813	0.468053	-1.09526	0.0422476	0.455974
ENSMUSG00000059456	Ptk2b	PTK2 protein tyrosine kinase 2 beta	1191.59	2153.59	0.553511	-0.853315	0.0421491	0.455974
ENSMUSG00000003949	Hlf	hepatic leukemia factor	510.402	1560.92	0.327418	-1.61079	0.0424858	0.457066
ENSMUSG00000028261	Ndufaf4	NADH dehydrogenase (ubiquinone) 1 alpha subcomplex, assembly factor 4	363.191	703.293	0.517102	-0.95148	0.0428026	0.458558
ENSMUSG00000074497	A430078G23Rik	RIKEN cDNA A430078G23 gene	8.31418	120.716	0.0765236	-3.70795	0.0427368	0.458558
ENSMUSG00000024892	Pcx	pyruvate carboxylase	2167.68	4433.66	0.489029	-1.03201	0.0428553	0.458645
ENSMUSG00000086564	Cd101	CD101 antigen	13.2564	50.3847	0.277444	-1.84973	0.0429782	0.459416
ENSMUSG00000042096	Dao	D-amino acid oxidase	1086.6	3324.19	0.32708	-1.61229	0.0429504	0.459416
ENSMUSG00000026009	Icos	inducible T cell co-stimulator	26.1202	327.975	0.0824385	-3.60054	0.0432383	0.459699
ENSMUSG00000026202	Tuba4a	tubulin, alpha 4A	536.869	1024.94	0.524267	-0.931626	0.0432744	0.459699
ENSMUSG00000004151	Etv1	ets variant 1	138.638	312.321	0.445672	-1.16595	0.0431693	0.459699
ENSMUSG00000022425	Enpp2	ectonucleotide pyrophosphatase/phosphodiesterase 2	1987.8	3837.49	0.518121	-0.948639	0.0432887	0.459699
ENSMUSG00000039315	Clnk	cytokine-dependent hematopoietic cell linker	16.7249	82.2853	0.212821	-2.23229	0.0430568	0.459699
ENSMUSG00000039934	Gsap	gamma-secretase activating protein	242.269	491.524	0.493924	-1.01764	0.0433833	0.460266
ENSMUSG00000021376	Tpmt	thiopurine methyltransferase	327.882	911.444	0.360441	-1.47217	0.0434722	0.460698
ENSMUSG00000028405	Aco1	aconitase 1	1589.19	2947.97	0.539235	-0.891013	0.0435209	0.460977
ENSMUSG00000025911	Adhfe1	alcohol dehydrogenase, iron containing, 1	636.202	1419.38	0.448614	-1.15645	0.0439323	0.462
ENSMUSG00000026011	Ctla4	cytotoxic T-lymphocyte-associated protein 4	5.84309	102.185	0.0663183	-3.91445	0.0439557	0.462
ENSMUSG00000020395	Itk	IL2 inducible T cell kinase	70.0913	1069.88	0.066386	-3.91298	0.0437925	0.462
ENSMUSG00000030747	Dgat2	diacylglycerol O-acyltransferase 2	444.667	896.861	0.496365	-1.01053	0.0437738	0.462
ENSMUSG00000003809	Gcdh	glutaryl-Coenzyme A dehydrogenase	1301.72	2845.83	0.457605	-1.12782	0.0438978	0.462
ENSMUSG00000051354	Samd3	sterile alpha motif domain containing 3	3.88036	104.006	0.0464768	-4.42734	0.0441175	0.462302
ENSMUSG00000044433	Camsap3	calmodulin regulated spectrin-associated protein family, member 3	238.55	480.647	0.497355	-1.00765	0.0440979	0.462302
ENSMUSG00000025792	Slc25a10	solute carrier family 25 (mitochondrial carrier, dicarboxylate transporter), member 10	1378.96	3243.18	0.425363	-1.23323	0.0441479	0.462385
ENSMUSG00000038072	Galnt11	UDP-N-acetyl-alpha-D-galactosamine:polypeptide N-acetylgalactosaminyltransferase 11	2603.88	5191.66	0.501647	-0.995256	0.0441854	0.462543
ENSMUSG00000076441	Ass1	argininosuccinate synthetase 1	1031.88	3112.15	0.331781	-1.5917	0.0444976	0.46363
ENSMUSG00000023120	Gm853	predicted gene 853	57.7295	373.588	0.156784	-2.67315	0.0444501	0.46363
ENSMUSG00000086784	Isoc2a	isochorismatase domain containing 2a	481.173	1264.91	0.380889	-1.39256	0.0444491	0.46363
ENSMUSG00000006732	Mettl1	methyltransferase like 1	118.857	315.36	0.378862	-1.40026	0.0445872	0.464154
ENSMUSG00000030361	Klrb1a	killer cell lectin-like receptor subfamily B member 1A	1.6667	25.2822	0.101464	-3.30096	0.0448941	0.465231
ENSMUSG00000024130	Abca3	ATP-binding cassette, sub-family A (ABC1), member 3	4247.32	8008.19	0.530431	-0.914763	0.0453692	0.468517
ENSMUSG00000028967	Errfi1	ERBB receptor feedback inhibitor 1	3958.53	8514.87	0.464959	-1.10482	0.0457051	0.470606
ENSMUSG00000076916	Traj13	T cell receptor alpha joining 13	0	7.80417	0.113582	-3.13819	0.0457745	0.470705
ENSMUSG00000035472	Slc25a21	solute carrier family 25 (mitochondrial oxodicarboxylate carrier), member 21	115.896	303.552	0.383831	-1.38146	0.0458227	0.470744
ENSMUSG00000038065	Mturn	maturin, neural progenitor differentiation regulator homolog (Xenopus)	1080.99	2089.62	0.517546	-0.950241	0.0459181	0.471179
ENSMUSG00000063683	Glyat	glycine-N-acyltransferase	1167.04	4086.53	0.285757	-1.80714	0.0460753	0.472008
ENSMUSG00000066829	Zfp810	zinc finger protein 810	136.077	265.552	0.51426	-0.95943	0.0461822	0.472551
ENSMUSG00000042041	2010003K11Rik	RIKEN cDNA 2010003K11 gene	3.82245	22.2722	0.20722	-2.27077	0.0463895	0.473108
ENSMUSG00000020604	Arsg	arylsulfatase G	125.137	260.724	0.481949	-1.05305	0.0466919	0.475252
ENSMUSG00000032238	Rora	RAR-related orphan receptor alpha	1068.1	1921.86	0.555995	-0.846857	0.0469347	0.476309
ENSMUSG00000028692	Akr1a1	aldo-keto reductase family 1, member A1 (aldehyde reductase)	6020.73	13551.4	0.444328	-1.1703	0.0470433	0.476874
ENSMUSG00000036825	Ssx2ip	synovial sarcoma, X 2 interacting protein	395.965	773.886	0.512289	-0.96497	0.047208	0.477052
ENSMUSG00000073988	Ttpa	tocopherol (alpha) transfer protein	45.8438	112.099	0.414183	-1.27166	0.0472544	0.477202
ENSMUSG00000020100	Slc29a3	solute carrier family 29 (nucleoside transporters), member 3	808.927	1467.6	0.551496	-0.858577	0.0474411	0.477679
ENSMUSG00000071068	Treml2	triggering receptor expressed on myeloid cells-like 2	6.66679	44.8128	0.16735	-2.57906	0.0474983	0.477679
ENSMUSG00000029017	Pmpcb	peptidase (mitochondrial processing) beta	1088.21	2020.26	0.538875	-0.891976	0.0474576	0.477679
ENSMUSG00000038453	Srcin1	SRC kinase signaling inhibitor 1	308.197	598.346	0.515891	-0.954862	0.0476376	0.478024
ENSMUSG00000042262	Ccr8	chemokine (C-C motif) receptor 8	3.70664	45.8913	0.100373	-3.31655	0.0477142	0.478326
ENSMUSG00000049608	Gpr55	G protein-coupled receptor 55	0.823697	17.8464	0.0967661	-3.36935	0.0477647	0.4786
ENSMUSG00000091498	Mpc1-ps	mitochondrial pyruvate carrier 1, pseudogene	675.79	1296.25	0.521712	-0.938674	0.0480371	0.479463
ENSMUSG00000074064	Mlycd	malonyl-CoA decarboxylase	326.814	620.46	0.52749	-0.922784	0.0479795	0.479463
ENSMUSG00000020051	Pah	phenylalanine hydroxylase	3758.4	10103.5	0.372052	-1.42642	0.0482079	0.479859
ENSMUSG00000038967	Pdk2	pyruvate dehydrogenase kinase, isoenzyme 2	1627.43	2950.34	0.551762	-0.857883	0.048416	0.480682
ENSMUSG00000085087	Gm13528	predicted gene 13528	31.5063	78.0238	0.411349	-1.28157	0.0486083	0.481948
ENSMUSG00000040472	Rabggta	Rab geranylgeranyl transferase, a subunit	302.528	577.136	0.525011	-0.929581	0.0489274	0.482884
ENSMUSG00000038515	Grtp1	GH regulated TBC protein 1	224.27	617.659	0.364127	-1.45749	0.0488637	0.482884
ENSMUSG00000035355	Kcnh4	potassium voltage-gated channel, subfamily H (eag-related), member 4	23.9	77.6725	0.316502	-1.65971	0.0490945	0.483918
ENSMUSG00000023806	Rsph3b	radial spoke 3B homolog (Chlamydomonas)	112.042	226.651	0.496558	-1.00997	0.0492302	0.484792
ENSMUSG00000020003	Pex7	peroxisomal biogenesis factor 7	295.185	553.071	0.534562	-0.903572	0.0494628	0.486384
ENSMUSG00000009614	Sardh	sarcosine dehydrogenase	1454.26	2707.33	0.537327	-0.896129	0.0495872	0.486445
ENSMUSG00000068874	Selenbp1	selenium binding protein 1	963.46	2046.51	0.47104	-1.08608	0.0495086	0.486445
ENSMUSG00000049723	Mmp12	matrix metallopeptidase 12	195.049	488.86	0.400214	-1.32116	0.0496483	0.486445
ENSMUSG00000039238	Zfp750	zinc finger protein 750	77.408	161.261	0.483221	-1.04925	0.0497536	0.486687
ENSMUSG00000071633	Gm4952	predicted gene 4952	7.92163	30.2809	0.28521	-1.8099	0.0497342	0.486687
ENSMUSG00000020072	Pbld2	phenazine biosynthesis-like protein domain containing 2	677.161	1688.86	0.401313	-1.3172	0.0498255	0.486697
ENSMUSG00000030630	Fah	fumarylacetoacetate hydrolase	1390.17	3490.47	0.398449	-1.32753	0.0498919	0.487114
ENSMUSG00000021322	Aoah	acyloxyacyl hydrolase	309.06	591.276	0.523505	-0.933725	0.0502198	0.489157
ENSMUSG00000022560	Slc52a2	solute carrier protein 52, member 2	132.608	274.726	0.48457	-1.04522	0.050198	0.489157
ENSMUSG00000034171	Faah	fatty acid amide hydrolase	336.229	661.521	0.509008	-0.974239	0.0502623	0.489339
ENSMUSG00000040350	Trim7	tripartite motif-containing 7	564.058	1773.3	0.318467	-1.65078	0.0503717	0.48969
ENSMUSG00000041119	Pde9a	phosphodiesterase 9A	276.163	505.002	0.54775	-0.868409	0.0504384	0.48969
ENSMUSG00000058470	Gm8369	predicted gene 8369	1.23555	16.0038	0.131474	-2.92715	0.0504411	0.48969
ENSMUSG00000024600	Slc27a6	solute carrier family 27 (fatty acid transporter), member 6	2.11715	46.8729	0.0651131	-3.94091	0.0504869	0.489904
ENSMUSG00000038121	Fam210a	family with sequence similarity 210, member A	1273.37	2286.07	0.557204	-0.843721	0.0505778	0.490003
ENSMUSG00000062524	Ncr1	natural cytotoxicity triggering receptor 1	4.66545	136.077	0.0413305	-4.59665	0.050625	0.490003
ENSMUSG00000031833	Mast3	microtubule associated serine/threonine kinase 3	447.395	878.827	0.50964	-0.972451	0.0506576	0.490003
ENSMUSG00000041440	Gk5	glycerol kinase 5 (putative)	158.433	351.86	0.451829	-1.14615	0.050685	0.490003
ENSMUSG00000082233	Gm6506	predicted gene 6506	0	9.49734	0.0952622	-3.39195	0.0508509	0.490805
ENSMUSG00000030769	Slc5a11	solute carrier family 5 (sodium/glucose cotransporter), member 11	216.921	415.215	0.523579	-0.93352	0.05106	0.491987
ENSMUSG00000019989	Enpp3	ectonucleotide pyrophosphatase/phosphodiesterase 3	191.496	559.389	0.343504	-1.5416	0.0512299	0.492711
ENSMUSG00000020309	Chac2	ChaC, cation transport regulator 2	118.451	323.933	0.367619	-1.44372	0.0512541	0.492711
ENSMUSG00000072664	Ugt3a1	UDP glycosyltransferases 3 family, polypeptide A1	283.384	750.794	0.378273	-1.4025	0.0512094	0.492711
ENSMUSG00000047746	Fbxo40	F-box protein 40	277.649	689.547	0.403519	-1.30929	0.0513744	0.49294
ENSMUSG00000035067	Xkr6	X-linked Kx blood group related 6	54.5826	121.716	0.452938	-1.14262	0.0516015	0.494198
ENSMUSG00000032370	Lactb	lactamase, beta	361.576	661.567	0.54723	-0.86978	0.0515866	0.494198
ENSMUSG00000040339	Fam102b	family with sequence similarity 102, member B	487.151	992.764	0.491214	-1.02558	0.0518004	0.494857
ENSMUSG00000059921	Unc5c	unc-5 netrin receptor C	152.731	295.036	0.519298	-0.945366	0.051784	0.494857
ENSMUSG00000039988	Ankrd13c	ankyrin repeat domain 13c	1671.13	3342.21	0.500157	-0.999546	0.051812	0.494857
ENSMUSG00000007777	0610009B22Rik	RIKEN cDNA 0610009B22 gene	45.0394	109.274	0.417498	-1.26016	0.0523146	0.496389
ENSMUSG00000022829	Stxbp5l	syntaxin binding protein 5-like	84.358	565.374	0.15071	-2.73016	0.0521926	0.496389
ENSMUSG00000034687	Fras1	Fraser extracellular matrix complex subunit 1	883.933	1823.47	0.485036	-1.04384	0.0522463	0.496389
ENSMUSG00000032940	Rbm11	RNA binding motif protein 11	22.1561	57.8545	0.393447	-1.34576	0.0525023	0.497006
ENSMUSG00000062410	Hsd3b3	hydroxy-delta-5-steroid dehydrogenase, 3 beta- and steroid delta-isomerase 3	154.301	618.051	0.25087	-1.99499	0.0525464	0.497006
ENSMUSG00000030225	Dera	deoxyribose-phosphate aldolase (putative)	196.336	445.885	0.44158	-1.17925	0.052531	0.497006
ENSMUSG00000032561	Acpp	acid phosphatase, prostate	70.1813	196.546	0.360327	-1.47262	0.0525077	0.497006
ENSMUSG00000064225	Paqr9	progestin and adipoQ receptor family member IX	233.524	477.143	0.49049	-1.02771	0.0525912	0.497202
ENSMUSG00000020062	Slc5a8	solute carrier family 5 (iodide transporter), member 8	411.532	1555.09	0.265109	-1.91534	0.0526598	0.497442
ENSMUSG00000064181	Rab3ip	RAB3A interacting protein	1917.43	3448.88	0.556087	-0.846616	0.052665	0.497442
ENSMUSG00000030545	Pex11a	peroxisomal biogenesis factor 11 alpha	271.98	504.074	0.540475	-0.887699	0.0527867	0.497452
ENSMUSG00000021033	Gstz1	glutathione transferase zeta 1 (maleylacetoacetate isomerase)	1212.77	2877.56	0.421658	-1.24585	0.0529729	0.498522
ENSMUSG00000086245	Gm16170	predicted gene 16170	55.49	248.725	0.226209	-2.14427	0.0533645	0.501062
ENSMUSG00000047040	Prr15l	proline rich 15-like	643.891	1222.93	0.5269	-0.924398	0.0534873	0.501072
ENSMUSG00000025138	Sirt7	sirtuin 7	301.054	548.691	0.549498	-0.863814	0.0534661	0.501072
ENSMUSG00000076770	Trav8d-1	T cell receptor alpha variable 8D-1	0	7.1634	0.122498	-3.02917	0.0534353	0.501072
ENSMUSG00000001700	Gramd3	GRAM domain containing 3	277.939	686.947	0.405466	-1.30235	0.0534809	0.501072
ENSMUSG00000028071	Sh2d2a	SH2 domain containing 2A	68.283	756.482	0.0914648	-3.45064	0.0535887	0.501566
ENSMUSG00000020228	Helb	helicase (DNA) B	340.244	622.224	0.547546	-0.868948	0.0539072	0.501808
ENSMUSG00000076900	Traj29	T cell receptor alpha joining 29	0	7.25924	0.121077	-3.04601	0.0539491	0.501808
ENSMUSG00000040247	Tbc1d10c	TBC1 domain family, member 10c	20.4057	220.28	0.096736	-3.3698	0.0536738	0.501808
ENSMUSG00000005089	Slc1a2	solute carrier family 1 (glial high affinity glutamate transporter), member 2	77.0348	169.155	0.458609	-1.12466	0.053902	0.501808
ENSMUSG00000027371	Fahd2a	fumarylacetoacetate hydrolase domain containing 2A	270.893	637.355	0.425927	-1.23132	0.0538946	0.501808
ENSMUSG00000040740	Slc25a34	solute carrier family 25, member 34	132.802	309.6	0.430785	-1.21496	0.0540648	0.501808
ENSMUSG00000076490	Trbc1	T cell receptor beta, constant region 1	8.35279	103.804	0.0892404	-3.48616	0.0537157	0.501808
ENSMUSG00000030165	Klrd1	killer cell lectin-like receptor, subfamily D, member 1	8.41069	139.577	0.0669435	-3.90091	0.0540776	0.501808
ENSMUSG00000006585	Cdt1	chromatin licensing and DNA replication factor 1	66.4812	137.413	0.487533	-1.03643	0.0540472	0.501808
ENSMUSG00000024588	Fech	ferrochelatase	976.825	1774.55	0.550715	-0.860621	0.0541559	0.501856
ENSMUSG00000031294	D630029K05Rik	RIKEN cDNA D630029K05 gene	199.733	646.946	0.309799	-1.69059	0.0542364	0.502376
ENSMUSG00000046082	Tmem174	transmembrane protein 174	1225.1	2458.51	0.498513	-1.0043	0.054264	0.502406
ENSMUSG00000028603	Scp2	sterol carrier protein 2, liver	1394.26	2762.42	0.504904	-0.98592	0.0544527	0.503698
ENSMUSG00000086052	Gm11802	predicted gene 11802	0	9.65792	0.0938269	-3.41385	0.054746	0.505052
ENSMUSG00000063856	Gpx1	glutathione peroxidase 1	6121.3	12366.9	0.495017	-1.01445	0.0548119	0.505246
ENSMUSG00000047454	Gphn	gephyrin	711.318	1316.04	0.540848	-0.886705	0.0550636	0.505394
ENSMUSG00000028461	Ccdc107	coiled-coil domain containing 107	504.951	973.376	0.519256	-0.945483	0.0550383	0.505394
ENSMUSG00000049410	Zfp683	zinc finger protein 683	4.31151	78.6231	0.0667082	-3.90599	0.0549012	0.505394
ENSMUSG00000021003	Galc	galactosylceramidase	645.59	1197.13	0.539667	-0.889857	0.0553874	0.506227
ENSMUSG00000086312	Gm15336	predicted gene 15336	5.9396	24.9905	0.267006	-1.90506	0.0555042	0.506374
ENSMUSG00000032492	Pth1r	parathyroid hormone 1 receptor	2479.53	4654.23	0.532847	-0.908206	0.0555976	0.506778
ENSMUSG00000056752	Dnah9	dynein, axonemal, heavy chain 9	5.9203	37.8203	0.178265	-2.48791	0.0558682	0.507947
ENSMUSG00000090150	Acad11	acyl-Coenzyme A dehydrogenase family, member 11	1244.6	2382.58	0.522575	-0.93629	0.0560167	0.508571
ENSMUSG00000015357	Clpx	caseinolytic mitochondrial matrix peptidase chaperone subunit	934.591	1672.47	0.559072	-0.838895	0.0560538	0.508684
ENSMUSG00000000817	Fasl	Fas ligand (TNF superfamily, member 6)	13.5652	264.041	0.0549546	-4.18562	0.0565364	0.510703
ENSMUSG00000085089	Arhgap15os	Rho GTPase activating protein 15, opposite strand	4.15709	32.6647	0.15319	-2.70661	0.0565407	0.510703
ENSMUSG00000069835	Sat2	spermidine/spermine N1-acetyl transferase 2	59.8595	135.707	0.445181	-1.16754	0.0566811	0.511446
ENSMUSG00000076928	Trac	T cell receptor alpha constant	24.2089	228.597	0.109796	-3.1871	0.0567305	0.511485
ENSMUSG00000051166	Eml5	echinoderm microtubule associated protein like 5	528.837	983.805	0.538013	-0.894288	0.0568267	0.511513
ENSMUSG00000003882	Il7r	interleukin 7 receptor	57.9225	657.648	0.0894598	-3.48262	0.0568277	0.511513
ENSMUSG00000025815	Dhtkd1	dehydrogenase E1 and transketolase domain containing 1	291.942	808.231	0.362001	-1.46594	0.0568882	0.511746
ENSMUSG00000075025	Gm10804	predicted gene 10804	216.175	746.595	0.290498	-1.7834	0.0570376	0.512642
ENSMUSG00000005373	Mlxipl	MLX interacting protein-like	807.434	2814.09	0.287178	-1.79998	0.0570212	0.512642
ENSMUSG00000054733	Msra	methionine sulfoxide reductase A	840.266	1880.99	0.447008	-1.16163	0.0573665	0.513925
ENSMUSG00000056131	Pgm3	phosphoglucomutase 3	168.478	322.454	0.523963	-0.932464	0.0572823	0.513925
ENSMUSG00000045065	9930022D16Rik	RIKEN cDNA 9930022D16 gene	4.53033	22.6562	0.233779	-2.09678	0.0574632	0.514222
ENSMUSG00000022451	Twf1	twinfilin actin binding protein 1	672.379	1221.34	0.550893	-0.860155	0.0576266	0.515114
ENSMUSG00000031584	Gsr	glutathione reductase	1238.79	2471.12	0.501508	-0.995657	0.057638	0.515114
ENSMUSG00000081277	Gm15285	predicted gene 15285	160.55	310.778	0.518156	-0.948542	0.0577158	0.515586
ENSMUSG00000023068	Nus1	NUS1 dehydrodolichyl diphosphate synthase subunit	1672.02	2987.86	0.55975	-0.837144	0.0578561	0.516615
ENSMUSG00000025486	Sirt3	sirtuin 3	233.498	459.385	0.509352	-0.973264	0.0580891	0.518001
ENSMUSG00000078695	Cisd3	CDGSH iron sulfur domain 3	104.384	203.002	0.516584	-0.952926	0.0581898	0.518256
ENSMUSG00000044231	Nhlrc1	NHL repeat containing 1	13.8419	42.5687	0.340656	-1.55361	0.0582302	0.518348
ENSMUSG00000034612	Chst11	carbohydrate sulfotransferase 11	600.035	1097.68	0.54705	-0.870256	0.058381	0.518938
ENSMUSG00000083579	Gm15538	predicted gene 15538	3.72594	18.5804	0.241361	-2.05074	0.058555	0.520097
ENSMUSG00000038173	Enpp6	ectonucleotide pyrophosphatase/phosphodiesterase 6	556.979	977.972	0.569964	-0.811058	0.0585996	0.520097
ENSMUSG00000053453	Thoc7	THO complex 7	191.425	357.698	0.536456	-0.89847	0.0586709	0.520184
ENSMUSG00000054474	Thnsl2	threonine synthase-like 2 (bacterial)	712.304	1653.6	0.431104	-1.21389	0.058711	0.520188
ENSMUSG00000090213	Tmem189	transmembrane protein 189	518.394	958.206	0.541483	-0.885012	0.0588747	0.52119
ENSMUSG00000039450	Dcxr	dicarbonyl L-xylulose reductase	435.419	843.057	0.517049	-0.951626	0.0590575	0.52236
ENSMUSG00000029291	Rufy3	RUN and FYVE domain containing 3	1363.21	3240.36	0.420877	-1.24853	0.0591317	0.522566
ENSMUSG00000021451	Sema4d	sema domain, immunoglobulin domain (Ig), transmembrane domain (TM) and short cytoplasmic domain, (semaphorin) 4D	1083.52	1898.96	0.570811	-0.808914	0.059224	0.522934
ENSMUSG00000012889	Podnl1	podocan-like 1	22.407	207.332	0.112355	-3.15387	0.0592568	0.522999
ENSMUSG00000027239	Mdk	midkine	282.366	532.002	0.531642	-0.911474	0.0593213	0.523344
ENSMUSG00000005615	Pcyt1a	phosphate cytidylyltransferase 1, choline, alpha isoform	1208.56	2098.19	0.576204	-0.795349	0.0596225	0.524204
ENSMUSG00000024818	Slc25a45	solute carrier family 25, member 45	292.804	533.945	0.549224	-0.864534	0.0595683	0.524204
ENSMUSG00000086718	Gm16069	predicted gene 16069	0.431151	9.33193	0.138517	-2.85186	0.0596174	0.524204
ENSMUSG00000035769	Xylb	xylulokinase homolog (H. influenzae)	1918.95	5583.24	0.343816	-1.54029	0.059579	0.524204
ENSMUSG00000021786	Oxsm	3-oxoacyl-ACP synthase, mitochondrial	239.335	439.917	0.54508	-0.875461	0.0600008	0.524841
ENSMUSG00000024670	Cd6	CD6 antigen	15.2319	166.934	0.0966566	-3.37099	0.0599598	0.524841
ENSMUSG00000027305	Ndufaf1	NADH dehydrogenase (ubiquinone) 1 alpha subcomplex, assembly factor 1	131.688	245.054	0.539264	-0.890937	0.0601103	0.525576
ENSMUSG00000064202	4430402I18Rik	RIKEN cDNA 4430402I18 gene	36.7187	82.3777	0.452384	-1.14438	0.0601944	0.526088
ENSMUSG00000019312	Grb7	growth factor receptor bound protein 7	498.149	1243.44	0.401102	-1.31796	0.060371	0.526514
ENSMUSG00000087231	E230016M11Rik	RIKEN cDNA E230016M11 gene	26.8795	67.9423	0.404388	-1.30619	0.0605014	0.527387
ENSMUSG00000044986	Tst	thiosulfate sulfurtransferase, mitochondrial	143.645	334.712	0.43086	-1.21471	0.0607776	0.528237
ENSMUSG00000033427	Upb1	ureidopropionase, beta	545.46	1257.89	0.434081	-1.20396	0.0608855	0.528316
ENSMUSG00000028487	Bnc2	basonuclin 2	683.429	1974.21	0.34651	-1.52903	0.0609426	0.528475
ENSMUSG00000052595	A1cf	APOBEC1 complementation factor	662.849	1528.17	0.434124	-1.20382	0.0611585	0.529317
ENSMUSG00000031482	Slc25a15	solute carrier family 25 (mitochondrial carrier ornithine transporter), member 15	767.317	1823.79	0.421043	-1.24796	0.0612227	0.529412
ENSMUSG00000031671	Setd6	SET domain containing 6	98.8305	195.265	0.508652	-0.975249	0.0613742	0.529412
ENSMUSG00000091515	Zfp422-ps	zinc finger protein 422, pseudogene	7.11724	27.7581	0.282259	-1.82491	0.061744	0.531287
ENSMUSG00000076392	Gm25992	predicted gene, 25992	0.411848	9.91534	0.129345	-2.9507	0.0617435	0.531287
ENSMUSG00000022102	Dok2	docking protein 2	35.0971	144.293	0.248444	-2.00901	0.0618578	0.531822
ENSMUSG00000076749	Tcrg-C1	T cell receptor gamma, constant 1	7.6063	35.7473	0.234202	-2.09417	0.0621045	0.532362
ENSMUSG00000024910	Ctsw	cathepsin W	35.5218	253.966	0.143242	-2.80348	0.0620355	0.532362
ENSMUSG00000026730	Pter	phosphotriesterase related	1729.35	4105.72	0.421346	-1.24692	0.0621324	0.532362
ENSMUSG00000027605	Acss2	acyl-CoA synthetase short-chain family member 2	573.138	1438.25	0.398915	-1.32585	0.0624135	0.532875
ENSMUSG00000057058	Skap1	src family associated phosphoprotein 1	32.6067	233.204	0.143494	-2.80094	0.062688	0.533332
ENSMUSG00000030538	Cib1	calcium and integrin binding 1 (calmyrin)	441.951	814.761	0.542991	-0.881	0.0626974	0.533332
ENSMUSG00000021697	Depdc1b	DEP domain containing 1B	91.9772	255.531	0.36244	-1.46419	0.0628093	0.533912
ENSMUSG00000039640	Mrpl12	mitochondrial ribosomal protein L12	479.963	916.31	0.524319	-0.931482	0.0629421	0.534009
ENSMUSG00000033826	Dnah8	dynein, axonemal, heavy chain 8	42.2593	366.103	0.11784	-3.0851	0.0630472	0.534461
ENSMUSG00000015484	Fam163a	family with sequence similarity 163, member A	81.7581	178.689	0.460564	-1.11853	0.0631066	0.534524
ENSMUSG00000075391	Gm13443	predicted gene 13443	286.974	521.089	0.55158	-0.858358	0.0632351	0.534998
ENSMUSG00000063646	Jakmip1	janus kinase and microtubule interacting protein 1	24.2154	219.794	0.114203	-3.13033	0.0633522	0.535063
ENSMUSG00000044475	Ascc1	activating signal cointegrator 1 complex subunit 1	326.228	595.83	0.548277	-0.867024	0.0634397	0.535499
ENSMUSG00000006273	Atp6v1b2	ATPase, H+ transporting, lysosomal V1 subunit B2	1863.33	3445.01	0.541011	-0.886271	0.0636234	0.535541
ENSMUSG00000030091	Nup210	nucleoporin 210	336.743	771.498	0.437209	-1.19361	0.0636722	0.53557
ENSMUSG00000000934	Top1mt	DNA topoisomerase 1, mitochondrial	222.912	424.401	0.526356	-0.925888	0.0637394	0.535724
ENSMUSG00000045751	Mms22l	MMS22-like, DNA repair protein	20.721	53.8544	0.395977	-1.33651	0.0638839	0.536692
ENSMUSG00000028755	Cda	cytidine deaminase	484.906	1037.5	0.46789	-1.09576	0.0641262	0.537194
ENSMUSG00000001497	Pax9	paired box 9	4.94218	21.3213	0.266211	-1.90936	0.0643922	0.538022
ENSMUSG00000032446	Eomes	eomesodermin	10.1353	77.5728	0.14172	-2.81889	0.0643406	0.538022
ENSMUSG00000089659	Gm3470	predicted gene 3470	214.56	389.574	0.551905	-0.857508	0.0644921	0.538507
ENSMUSG00000001323	Srr	serine racemase	415.67	790.914	0.526156	-0.926438	0.0647891	0.539986
ENSMUSG00000005824	Tnfsf14	tumor necrosis factor (ligand) superfamily, member 14	7.09794	57.8456	0.137613	-2.86131	0.0647468	0.539986
ENSMUSG00000039157	Fam102a	family with sequence similarity 102, member A	919.926	1652.38	0.556996	-0.844262	0.0648915	0.539986
ENSMUSG00000027227	Sord	sorbitol dehydrogenase	2779.23	7340.41	0.378705	-1.40085	0.0649122	0.539986
ENSMUSG00000028737	Aldh4a1	aldehyde dehydrogenase 4 family, member A1	2045.38	3967.14	0.515701	-0.955393	0.0648594	0.539986
ENSMUSG00000085732	Gm4279	predicted gene 4279	45.3676	106.368	0.431856	-1.21138	0.0651313	0.540338
ENSMUSG00000020116	Pno1	partner of NOB1 homolog	231.773	432.103	0.537455	-0.895784	0.0653953	0.540851
ENSMUSG00000022742	Cpox	coproporphyrinogen oxidase	544.507	1443.8	0.377566	-1.4052	0.0654033	0.540851
ENSMUSG00000007415	Gatad1	GATA zinc finger domain containing 1	767.027	1370.39	0.560034	-0.836414	0.0652807	0.540851
ENSMUSG00000063063	Ctnna2	catenin (cadherin associated protein), alpha 2	2.47109	33.2102	0.101464	-3.30096	0.0652853	0.540851
ENSMUSG00000040181	Fmo1	flavin containing monooxygenase 1	2657.28	6086.74	0.436662	-1.19541	0.0655743	0.54165
ENSMUSG00000083773	Gm13394	predicted gene 13394	873.477	1536.73	0.568679	-0.814312	0.0659317	0.542536
ENSMUSG00000064796	Terc	telomerase RNA component	0	6.79476	0.128291	-2.9625	0.0659496	0.542536
ENSMUSG00000028243	Ubxn2b	UBX domain protein 2B	260.802	451.25	0.578889	-0.788642	0.0659059	0.542536
ENSMUSG00000005320	Fgfr4	fibroblast growth factor receptor 4	247.829	585.36	0.424362	-1.23663	0.0662547	0.543526
ENSMUSG00000076904	Traj25	T cell receptor alpha joining 25	0	6.76783	0.128736	-2.95751	0.0663859	0.543933
ENSMUSG00000089744	Gm16146	predicted gene 16146	8.82254	35.2397	0.271044	-1.8834	0.0664099	0.543933
ENSMUSG00000004865	Srpk1	serine/arginine-rich protein specific kinase 1	913.825	1581.27	0.578172	-0.79043	0.0664767	0.544046
ENSMUSG00000048186	Bend7	BEN domain containing 7	191.02	357.032	0.53632	-0.898833	0.0665776	0.54444
ENSMUSG00000046573	Lyrm4	LYR motif containing 4	111.926	217.438	0.51697	-0.951847	0.066677	0.545017
ENSMUSG00000037542	Aldh8a1	aldehyde dehydrogenase 8 family, member A1	2047.05	5058.53	0.404791	-1.30475	0.0668066	0.54543
ENSMUSG00000025163	Cd7	CD7 antigen	6.27424	53.4387	0.133623	-2.90376	0.0673447	0.547114
ENSMUSG00000084195	Gm15372	predicted gene 15372	4.58824	20.4612	0.260388	-1.94127	0.0674595	0.547297
ENSMUSG00000042359	Osbpl6	oxysterol binding protein-like 6	1171.49	2285.38	0.512816	-0.963488	0.0674239	0.547297
ENSMUSG00000028223	Decr1	2,4-dienoyl CoA reductase 1, mitochondrial	1011.03	1790.87	0.564792	-0.824209	0.067489	0.547297
ENSMUSG00000018168	Ikzf3	IKAROS family zinc finger 3	88.7338	822.482	0.108969	-3.19801	0.0677467	0.548553
ENSMUSG00000090231	Cfb	complement factor B	38.4433	87.9472	0.443447	-1.17317	0.0678405	0.549098
ENSMUSG00000037944	Ccr7	chemokine (C-C motif) receptor 7	15.5858	100.622	0.163211	-2.61519	0.0680204	0.549474
ENSMUSG00000039678	Tbc1d13	TBC1 domain family, member 13	818.991	1579.47	0.518826	-0.946676	0.0682159	0.550026
ENSMUSG00000059851	Kmt5c	lysine methyltransferase 5C	293.01	533.986	0.549566	-0.863636	0.0681277	0.550026
ENSMUSG00000032558	Nphp3	nephronophthisis 3 (adolescent)	190.055	341.204	0.558306	-0.840872	0.0681887	0.550026
ENSMUSG00000025950	Idh1	isocitrate dehydrogenase 1 (NADP+), soluble	3556.4	7355.5	0.483572	-1.0482	0.0683063	0.550272
ENSMUSG00000037477	Tbx10	T-box 10	5.03869	21.8928	0.263781	-1.92259	0.0684543	0.550603
ENSMUSG00000020098	Pcbd1	pterin 4 alpha carbinolamine dehydratase/dimerization cofactor of hepatocyte nuclear factor 1 alpha (TCF1) 1	566.072	999.152	0.566985	-0.818617	0.0687566	0.550807
ENSMUSG00000018509	Cenpv	centromere protein V	76.2369	158.043	0.485634	-1.04206	0.0685673	0.550807
ENSMUSG00000047502	Mroh7	maestro heat-like repeat family member 7	71.5842	242.441	0.29816	-1.74584	0.0688007	0.550807
ENSMUSG00000080665	Mir1199	microRNA 1199	2.47109	18.0422	0.182284	-2.45574	0.0687171	0.550807
ENSMUSG00000070867	Trabd2b	TraB domain containing 2B	2327.21	4134.78	0.562944	-0.828937	0.0690134	0.552081
ENSMUSG00000048758	Rpl29	ribosomal protein L29	733.674	1314.88	0.558315	-0.840848	0.0689975	0.552081
ENSMUSG00000039783	Kmo	kynurenine 3-monooxygenase (kynurenine 3-hydroxylase)	578.286	1436.31	0.403034	-1.31103	0.0692316	0.552568
ENSMUSG00000028138	Adh5	alcohol dehydrogenase 5 (class III), chi polypeptide	789.782	1415.8	0.558145	-0.841287	0.0691375	0.552568
ENSMUSG00000029122	Evc	EvC ciliary complex subunit 1	1904.91	3547.09	0.537165	-0.896563	0.0692354	0.552568
ENSMUSG00000009378	Slc16a12	solute carrier family 16 (monocarboxylic acid transporters), member 12	743.005	1332.18	0.558067	-0.84149	0.0692702	0.552632
ENSMUSG00000033854	Kcnk10	potassium channel, subfamily K, member 10	0	7.09383	0.123551	-3.01682	0.0698951	0.553588
ENSMUSG00000084292	Gm13535	predicted gene 13535	2.05924	14.1882	0.201423	-2.3117	0.0695272	0.553588
ENSMUSG00000037754	Ppp1r16b	protein phosphatase 1, regulatory (inhibitor) subunit 16B	2709.21	4456.46	0.608017	-0.717817	0.069848	0.553588
ENSMUSG00000068329	Htra2	HtrA serine peptidase 2	56.7835	114.724	0.499323	-1.00196	0.0697173	0.553588
ENSMUSG00000090256	Alms1-ps1	ALMS1, centrosome and basal body associated, pseudogene 1	10.7853	34.5226	0.331768	-1.59175	0.0696546	0.553588
ENSMUSG00000030365	Clec2i	C-type lectin domain family 2, member i	7.86373	94.8623	0.0924631	-3.43498	0.0694594	0.553588
ENSMUSG00000027359	Slc27a2	solute carrier family 27 (fatty acid transporter), member 2	11972.1	25904.1	0.462191	-1.11344	0.0699974	0.553714
ENSMUSG00000026687	Aldh9a1	aldehyde dehydrogenase 9, subfamily A1	2098.21	4100.9	0.511765	-0.966447	0.0701737	0.554469
ENSMUSG00000062248	Cks2	CDC28 protein kinase regulatory subunit 2	28.2952	88.1982	0.328429	-1.60635	0.0701267	0.554469
ENSMUSG00000023571	C1qtnf12	C1q and tumor necrosis factor related 12	185.569	362.203	0.513678	-0.961063	0.0704946	0.555938
ENSMUSG00000028093	Acp6	acid phosphatase 6, lysophosphatidic	305.958	553.749	0.553327	-0.853796	0.0708931	0.55744
ENSMUSG00000028893	Sesn2	sestrin 2	473.245	814.709	0.58139	-0.782423	0.0708923	0.55744
ENSMUSG00000022322	Shcbp1	Shc SH2-domain binding protein 1	4.13779	21.4662	0.22869	-2.12853	0.0709016	0.55744
ENSMUSG00000070337	Gpr179	G protein-coupled receptor 179	6.70539	25.7273	0.288297	-1.79437	0.0711181	0.55837
ENSMUSG00000021725	Parp8	poly (ADP-ribose) polymerase family, member 8	445.96	786.875	0.567298	-0.817821	0.0712682	0.55837
ENSMUSG00000038679	Trps1	transcriptional repressor GATA binding 1	1731.3	3333.83	0.519456	-0.944927	0.0713577	0.55837
ENSMUSG00000017688	Hnf4g	hepatocyte nuclear factor 4, gamma	56.9379	233.996	0.246549	-2.02006	0.0711357	0.55837
ENSMUSG00000028991	Mtor	mechanistic target of rapamycin (serine/threonine kinase)	2546.28	4423.7	0.575697	-0.796619	0.0714384	0.558674
ENSMUSG00000021565	Slc6a19	solute carrier family 6 (neurotransmitter transporter), member 19	1273.9	2225	0.572732	-0.804069	0.0720113	0.561414
ENSMUSG00000055737	Ghr	growth hormone receptor	2716.55	5038.71	0.539227	-0.891035	0.0719068	0.561414
ENSMUSG00000006517	Mvd	mevalonate (diphospho) decarboxylase	115.015	284.215	0.406763	-1.29774	0.0719988	0.561414
ENSMUSG00000032403	2300009A05Rik	RIKEN cDNA 2300009A05 gene	69.1132	141.475	0.492108	-1.02295	0.0719641	0.561414
ENSMUSG00000020775	Mrpl38	mitochondrial ribosomal protein L38	489.706	888.131	0.551894	-0.857537	0.0723482	0.561889
ENSMUSG00000023031	Cela1	chymotrypsin-like elastase family, member 1	195.332	457.07	0.428607	-1.22227	0.0723953	0.561889
ENSMUSG00000017950	Hnf4a	hepatic nuclear factor 4, alpha	4011.07	11866	0.338085	-1.56454	0.0723681	0.561889
ENSMUSG00000061859	Patj	PATJ, crumbs cell polarity complex component	1647.09	2961.8	0.556262	-0.846162	0.0722256	0.561889
ENSMUSG00000046562	Unc119b	unc-119 lipid binding chaperone B	1011.54	1764.71	0.573448	-0.802266	0.0723637	0.561889
ENSMUSG00000038451	Spsb2	splA/ryanodine receptor domain and SOCS box containing 2	110.587	216.208	0.513736	-0.960901	0.0721874	0.561889
ENSMUSG00000012117	Dhdds	dehydrodolichyl diphosphate synthase	302.289	517.281	0.585184	-0.773039	0.0724343	0.56198
ENSMUSG00000042210	Abhd14a	abhydrolase domain containing 14A	164.07	319.624	0.514838	-0.957809	0.0724821	0.562024
ENSMUSG00000027843	Ptpn22	protein tyrosine phosphatase, non-receptor type 22 (lymphoid)	141.322	1087.59	0.13074	-2.93523	0.072706	0.563027
ENSMUSG00000086652	Gm14029	predicted gene 14029	0.862302	21.2328	0.0837638	-3.57753	0.0727797	0.563386
ENSMUSG00000087030	Gm16143	predicted gene 16143	0	6.62985	0.131064	-2.93165	0.0729895	0.564162
ENSMUSG00000020122	Egfr	epidermal growth factor receptor	819.782	1516.7	0.540806	-0.886818	0.0736572	0.565924
ENSMUSG00000020142	Slc1a4	solute carrier family 1 (glutamate/neutral amino acid transporter), member 4	66.7772	142.844	0.471185	-1.08564	0.0735228	0.565924
ENSMUSG00000079261	Gm15217	predicted gene 15217	54.3703	122.041	0.450014	-1.15196	0.073546	0.565924
ENSMUSG00000028007	Snx7	sorting nexin 7	653.685	1290.88	0.506769	-0.980601	0.0736194	0.565924
ENSMUSG00000026027	Stradb	STE20-related kinase adaptor beta	178.433	324.307	0.55158	-0.858358	0.0738795	0.56675
ENSMUSG00000013611	Snx31	sorting nexin 31	5.9589	23.4134	0.285045	-1.81074	0.073881	0.56675
ENSMUSG00000004815	Dgkq	diacylglycerol kinase, theta	306.678	557.67	0.550734	-0.860574	0.0739999	0.566979
ENSMUSG00000019822	Smpd2	sphingomyelin phosphodiesterase 2, neutral	235.943	439.109	0.538374	-0.89332	0.0740643	0.567147
ENSMUSG00000028133	Rwdd3	RWD domain containing 3	30.155	69.0491	0.444759	-1.1689	0.074123	0.567386
ENSMUSG00000070695	Cntnap5a	contactin associated protein-like 5A	2.58691	37.1057	0.0941305	-3.40919	0.0741592	0.567451
ENSMUSG00000032010	Usp2	ubiquitin specific peptidase 2	822.627	1506.78	0.546253	-0.872358	0.0750325	0.57074
ENSMUSG00000022219	Cideb	cell death-inducing DNA fragmentation factor, alpha subunit-like effector B	56.7642	133.433	0.429687	-1.21864	0.0752649	0.571563
ENSMUSG00000022022	Mtrf1	mitochondrial translational release factor 1	79.9112	162.338	0.49536	-1.01345	0.0752469	0.571563
ENSMUSG00000028136	Snx27	sorting nexin family member 27	781.454	1343.04	0.582165	-0.7805	0.0755153	0.572299
ENSMUSG00000026656	Fcgr2b	Fc receptor, IgG, low affinity IIb	655.012	1152.92	0.568505	-0.814756	0.0758044	0.573373
ENSMUSG00000036391	Sec24a	Sec24 related gene family, member A (S. cerevisiae)	635.577	1096.04	0.580269	-0.785207	0.0757831	0.573373
ENSMUSG00000029275	Gfi1	growth factor independent 1	6.33215	59.9496	0.120299	-3.05531	0.0758309	0.573373
ENSMUSG00000053644	Aldh7a1	aldehyde dehydrogenase family 7, member A1	1660.27	3126.5	0.531183	-0.912719	0.0759444	0.573861
ENSMUSG00000036211	Hist1h1t	histone cluster 1, H1t	14.7621	39.6822	0.387445	-1.36794	0.0764	0.575824
ENSMUSG00000086968	4933431E20Rik	RIKEN cDNA 4933431E20 gene	71.2754	200.398	0.358869	-1.47847	0.0763751	0.575824
ENSMUSG00000074170	Plekhf1	pleckstrin homology domain containing, family F (with FYVE domain) member 1	84.6474	184.481	0.461759	-1.11479	0.0765288	0.576584
ENSMUSG00000049744	Arhgap15	Rho GTPase activating protein 15	165.917	720.813	0.231246	-2.1125	0.0766874	0.576781
ENSMUSG00000089694	Nat8f7	N-acetyltransferase 8 (GCN5-related) family member 7	24.3698	56.7075	0.439627	-1.18565	0.0770443	0.578563
ENSMUSG00000035235	Trim13	tripartite motif-containing 13	51.2042	103.076	0.501598	-0.995398	0.0772114	0.579473
ENSMUSG00000030838	Ush1c	USH1 protein network component harmonin	919.095	1614.72	0.569464	-0.812324	0.0773484	0.579732
ENSMUSG00000029074	Ttll10	tubulin tyrosine ligase-like family, member 10	150.215	273.958	0.549956	-0.862611	0.0777344	0.581835
ENSMUSG00000070780	Rbm47	RNA binding motif protein 47	3324.12	5763.54	0.576823	-0.793799	0.0777951	0.582078
ENSMUSG00000040899	Ccr6	chemokine (C-C motif) receptor 6	5.56636	31.1374	0.204321	-2.29109	0.0779135	0.582752
ENSMUSG00000074794	Arrdc3	arrestin domain containing 3	1516.31	2597.72	0.583866	-0.77629	0.0780274	0.582854
ENSMUSG00000041954	Tnfrsf18	tumor necrosis factor receptor superfamily, member 18	25.7597	97.7719	0.270925	-1.88404	0.0780814	0.582854
ENSMUSG00000030657	Xylt1	xylosyltransferase 1	286.697	529.027	0.542798	-0.881513	0.0780532	0.582854
ENSMUSG00000054191	Klf1	Kruppel-like factor 1 (erythroid)	7.96024	27.9349	0.309669	-1.6912	0.0780054	0.582854
ENSMUSG00000000326	Comt	catechol-O-methyltransferase	1310.91	2164.82	0.605733	-0.723246	0.0787419	0.585123
ENSMUSG00000061578	Ksr2	kinase suppressor of ras 2	100.214	227.89	0.442195	-1.17724	0.0787926	0.585185
ENSMUSG00000040860	Crocc	ciliary rootlet coiled-coil, rootletin	953.736	1783.01	0.535164	-0.901948	0.0790683	0.585857
ENSMUSG00000051671	Coa6	cytochrome c oxidase assembly factor 6	156.264	325.033	0.482356	-1.05183	0.0790618	0.585857
ENSMUSG00000018411	Mapt	microtubule-associated protein tau	1302.87	2201.48	0.592001	-0.756328	0.0791222	0.586021
ENSMUSG00000087672	Gm15122	predicted gene 15122	4.215	18.4034	0.268767	-1.89557	0.079262	0.586027
ENSMUSG00000024558	Mapk4	mitogen-activated protein kinase 4	428.65	747.806	0.57378	-0.801432	0.0794317	0.586278
ENSMUSG00000034028	Cd226	CD226 antigen	21.9952	230.032	0.0995325	-3.32869	0.0795181	0.586278
ENSMUSG00000015112	Slc25a13	solute carrier family 25 (mitochondrial carrier, adenine nucleotide translocator), member 13	523.555	1100.85	0.476069	-1.07076	0.0795237	0.586278
ENSMUSG00000064109	Hcst	hematopoietic cell signal transducer	10.9204	43.5891	0.267339	-1.90326	0.0795015	0.586278
ENSMUSG00000052738	Suclg1	succinate-CoA ligase, GDP-forming, alpha subunit	2223.63	3797.93	0.585593	-0.772029	0.0797729	0.586853
ENSMUSG00000030800	Prss8	protease, serine 8 (prostasin)	839.77	1569.9	0.535216	-0.901807	0.0798697	0.586853
ENSMUSG00000031780	Ccl17	chemokine (C-C motif) ligand 17	2.5097	16.5982	0.199435	-2.32601	0.0800543	0.58694
ENSMUSG00000044162	Tnip3	TNFAIP3 interacting protein 3	91.147	333.246	0.275686	-1.8589	0.080388	0.587951
ENSMUSG00000033618	Map3k13	mitogen-activated protein kinase kinase kinase 13	428.116	861.689	0.497416	-1.00747	0.0809233	0.590465
ENSMUSG00000026175	Vil1	villin 1	978.808	2341.34	0.418303	-1.25738	0.0811003	0.5909
ENSMUSG00000028470	Hint2	histidine triad nucleotide binding protein 2	470.33	828.461	0.568236	-0.815438	0.0811264	0.5909
ENSMUSG00000033027	Klrc3	killer cell lectin-like receptor subfamily C, member 3	0	10.4536	0.0873091	-3.51772	0.0811067	0.5909
ENSMUSG00000022304	Dpys	dihydropyrimidinase	115.395	348.029	0.333481	-1.58432	0.0812161	0.591135
ENSMUSG00000081911	Mrps36-ps2	mitochondrial ribosomal protein S36, pseudogene 2	23.5847	53.859	0.448143	-1.15797	0.0812144	0.591135
ENSMUSG00000033488	BC026585	cDNA sequence BC026585	837.209	2061.4	0.406424	-1.29894	0.081309	0.591602
ENSMUSG00000031485	Prosc	proline synthetase co-transcribed	983.723	1672.84	0.588302	-0.765372	0.0814588	0.592065
ENSMUSG00000020593	Lpin1	lipin 1	1007.4	1709.7	0.589465	-0.762521	0.0815433	0.59247
ENSMUSG00000052736	Klrc2	killer cell lectin-like receptor subfamily C, member 2	0.843	26.665	0.0666184	-3.90794	0.0820077	0.595167
ENSMUSG00000044444	Pfn3	profilin 3	192.745	504.125	0.383558	-1.38248	0.082352	0.59601
ENSMUSG00000076917	Traj12	T cell receptor alpha joining 12	0.862302	27.7711	0.0647282	-3.94946	0.0823396	0.59601
ENSMUSG00000027808	Serp1	stress-associated endoplasmic reticulum protein 1	1070.04	1806.65	0.592507	-0.755097	0.0823779	0.59601
ENSMUSG00000038298	Pdzk1	PDZ domain containing 1	2385.9	5529.69	0.431574	-1.21232	0.0823172	0.59601
ENSMUSG00000055373	Fut9	fucosyltransferase 9	2756.09	6018.07	0.458059	-1.12639	0.0825869	0.596298
ENSMUSG00000028527	Ak4	adenylate kinase 4	737.523	2333.81	0.31631	-1.66059	0.0825915	0.596298
ENSMUSG00000055900	Tmem69	transmembrane protein 69	71.1145	138.697	0.516221	-0.953938	0.0825465	0.596298
ENSMUSG00000092008	Cyp2c69	cytochrome P450, family 2, subfamily c, polypeptide 69	2.05924	13.4631	0.211521	-2.24113	0.0826786	0.596718
ENSMUSG00000019982	Myb	myeloblastosis oncogene	0.411848	12.1953	0.106997	-3.22436	0.0827712	0.597177
ENSMUSG00000028691	Prdx1	peroxiredoxin 1	1557.85	2614.31	0.596049	-0.746497	0.0828974	0.59725
ENSMUSG00000079262	Slco1a6	solute carrier organic anion transporter family, member 1a6	590.307	1624.88	0.363684	-1.45924	0.0830471	0.59812
ENSMUSG00000020087	Tysnd1	trypsin domain containing 1	280.726	507.821	0.553683	-0.852869	0.0834411	0.599698
ENSMUSG00000063229	Ldha	lactate dehydrogenase A	1815.65	3045.29	0.596349	-0.745771	0.0834275	0.599698
ENSMUSG00000020064	Herc4	hect domain and RLD 4	684.76	1157.06	0.592163	-0.755935	0.0835775	0.600469
ENSMUSG00000026956	Uap1l1	UDP-N-acteylglucosamine pyrophosphorylase 1-like 1	493.818	951.149	0.519685	-0.94429	0.0838024	0.601037
ENSMUSG00000076902	Traj27	T cell receptor alpha joining 27	0	6.57565	0.132002	-2.92137	0.0840661	0.601518
ENSMUSG00000022240	Ctnnd2	catenin (cadherin associated protein), delta 2	46.0561	136.671	0.3418	-1.54877	0.0839697	0.601518
ENSMUSG00000090176	Cd200r2	Cd200 receptor 2	0	7.47835	0.117948	-3.08378	0.0840669	0.601518
ENSMUSG00000068180	AY512915	cDNA sequence AY512915	0	7.25491	0.12114	-3.04525	0.0840473	0.601518
ENSMUSG00000037318	Traf3ip3	TRAF3 interacting protein 3	47.5812	253.684	0.190751	-2.39024	0.0842398	0.602076
ENSMUSG00000024228	Nudt12	nudix (nucleoside diphosphate linked moiety X)-type motif 12	442.794	824.452	0.537637	-0.895295	0.084231	0.602076
ENSMUSG00000000318	Clec10a	C-type lectin domain family 10, member A	20.5087	49.263	0.427923	-1.22458	0.0844467	0.602927
ENSMUSG00000022416	Cacna1i	calcium channel, voltage-dependent, alpha 1I subunit	2.529	18.5837	0.180201	-2.47232	0.0844952	0.603065
ENSMUSG00000074919	Gm10787	predicted gene 10787	37.4138	101.866	0.373437	-1.42106	0.0845927	0.603208
ENSMUSG00000069515	Lyz1	lysozyme 1	59.7115	182.682	0.330525	-1.59717	0.0847908	0.603837
ENSMUSG00000087165	2010001A14Rik	RIKEN cDNA 2010001A14 gene	6.31285	22.8069	0.307173	-1.70287	0.0851884	0.604076
ENSMUSG00000027709	Mccc1	methylcrotonoyl-Coenzyme A carboxylase 1 (alpha)	1184.5	2026.27	0.584775	-0.774046	0.0851206	0.604076
ENSMUSG00000049709	Nlrp10	NLR family, pyrin domain containing 10	0.862302	11.0743	0.154237	-2.69678	0.0851665	0.604076
ENSMUSG00000040170	Fmo2	flavin containing monooxygenase 2	2148.11	4602.77	0.466814	-1.09908	0.0853346	0.604266
ENSMUSG00000017868	Sgk2	serum/glucocorticoid regulated kinase 2	1055.3	1885.81	0.559832	-0.836935	0.085425	0.604391
ENSMUSG00000029516	Cit	citron	322.966	566.042	0.571326	-0.807615	0.0855714	0.604391
ENSMUSG00000028683	Eif2b3	eukaryotic translation initiation factor 2B, subunit 3	110.452	197.12	0.562549	-0.829949	0.0856346	0.604491
ENSMUSG00000027883	Gpsm2	G-protein signalling modulator 2 (AGS3-like, C. elegans)	58.5981	115.085	0.5134	-0.961845	0.0859757	0.605032
ENSMUSG00000064731	Snord45b	small nucleolar RNA, C/D box 45B	2.07854	15.0435	0.191887	-2.38167	0.0859302	0.605032
ENSMUSG00000028292	Rars2	arginyl-tRNA synthetase 2, mitochondrial	277.662	513.018	0.542126	-0.883301	0.0858802	0.605032
ENSMUSG00000075591	Gm10874	predicted gene 10874	1.27415	14.7643	0.144259	-2.79327	0.0857884	0.605032
ENSMUSG00000033720	Sfxn5	sideroflexin 5	216.625	393.717	0.551345	-0.858974	0.0858477	0.605032
ENSMUSG00000029722	Agfg2	ArfGAP with FG repeats 2	210.306	366.48	0.575014	-0.798331	0.0862657	0.606038
ENSMUSG00000069633	Pex11g	peroxisomal biogenesis factor 11 gamma	71.3526	139.08	0.516509	-0.953134	0.0862376	0.606038
ENSMUSG00000042428	Mgat3	mannoside acetylglucosaminyltransferase 3	779.093	1495.73	0.521197	-0.940101	0.0863608	0.606292
ENSMUSG00000047898	Ccr4	chemokine (C-C motif) receptor 4	4.27291	30.6719	0.166485	-2.58653	0.08636	0.606292
ENSMUSG00000081669	Npm3-ps1	nucleoplasmin 3, pseudogene 1	42.5425	111.081	0.388492	-1.36404	0.0865843	0.606621
ENSMUSG00000026385	Dbi	diazepam binding inhibitor	2756.9	4917.76	0.56069	-0.834725	0.0869944	0.608551
ENSMUSG00000051235	Gen1	GEN1, Holliday junction 5' flap endonuclease	2.07854	13.4899	0.212462	-2.23472	0.0869946	0.608551
ENSMUSG00000002346	Slc25a42	solute carrier family 25, member 42	489.269	1237.63	0.395816	-1.3371	0.0870372	0.608551
ENSMUSG00000035754	Wdr18	WD repeat domain 18	293.049	514.774	0.570111	-0.810684	0.0871512	0.608996
ENSMUSG00000032105	Pdzd3	PDZ domain containing 3	399.731	967.138	0.413919	-1.27258	0.08716	0.608996
ENSMUSG00000038624	Nepn	nephrocan	85.0529	168.043	0.50906	-0.974091	0.0872172	0.609163
ENSMUSG00000023030	Slc11a2	solute carrier family 11 (proton-coupled divalent metal ion transporters), member 2	424.042	733.554	0.578639	-0.789265	0.087315	0.609459
ENSMUSG00000022761	Lztr1	leucine-zipper-like transcriptional regulator, 1	947.763	1647.27	0.575611	-0.796834	0.0876001	0.610277
ENSMUSG00000091695	Gm17669	predicted gene, 17669	17.2525	45.6963	0.390878	-1.35521	0.0876841	0.610277
ENSMUSG00000029821	Dfna5	deafness, autosomal dominant 5 (human)	208.028	362.817	0.574541	-0.799517	0.08756	0.610277
ENSMUSG00000000486	Sept1	septin 1	54.1643	326.741	0.168317	-2.57075	0.087699	0.610277
ENSMUSG00000040351	Ankib1	ankyrin repeat and IBR domain containing 1	1492.57	2529.84	0.590148	-0.760851	0.0877953	0.610329
ENSMUSG00000076498	Trbc2	T cell receptor beta, constant 2	8.68742	87.7629	0.109138	-3.19577	0.0877796	0.610329
ENSMUSG00000032053	Pou2af1	POU domain, class 2, associating factor 1	10.7467	42.4521	0.270336	-1.88717	0.0877394	0.610329
ENSMUSG00000022821	Hgd	homogentisate 1, 2-dioxygenase	926.567	1904.61	0.486756	-1.03873	0.0879393	0.610413
ENSMUSG00000033972	Zfp944	zinc finger protein 944	88.1612	164.989	0.537153	-0.896596	0.0879557	0.610413
ENSMUSG00000023456	Tpi1	triosephosphate isomerase 1	1809.25	3216.15	0.562686	-0.829598	0.0879553	0.610413
ENSMUSG00000025137	Pcyt2	phosphate cytidylyltransferase 2, ethanolamine	729.086	1571.92	0.46416	-1.10731	0.0886572	0.613214
ENSMUSG00000027429	Sec23b	SEC23 homolog B, COPII coat complex component	632.984	1090.77	0.580692	-0.784155	0.0885831	0.613214
ENSMUSG00000033308	Dpyd	dihydropyrimidine dehydrogenase	833.071	1494.78	0.557618	-0.842652	0.08856	0.613214
ENSMUSG00000025791	Pgm2	phosphoglucomutase 2	426.198	803.639	0.530919	-0.913437	0.0887308	0.613518
ENSMUSG00000087557	Gm15869	predicted gene 15869	3.372	16.4378	0.25072	-1.99585	0.0888593	0.613605
ENSMUSG00000030739	Myh14	myosin, heavy polypeptide 14	382.902	690.134	0.555467	-0.848226	0.0888103	0.613605
ENSMUSG00000022496	Tnfrsf17	tumor necrosis factor receptor superfamily, member 17	0	6.95551	0.125699	-2.99195	0.0892819	0.614645
ENSMUSG00000017386	Traf4	TNF receptor associated factor 4	512.866	931.18	0.551251	-0.859218	0.089514	0.615275
ENSMUSG00000072594	Gm16439	predicted pseudogene 16439	268.068	466.144	0.575984	-0.795899	0.0895386	0.615275
ENSMUSG00000028378	Ptgr1	prostaglandin reductase 1	33.1537	75.4279	0.446875	-1.16206	0.0894882	0.615275
ENSMUSG00000040612	Ildr2	immunoglobulin-like domain containing receptor 2	758.713	1478.16	0.513612	-0.961249	0.0897329	0.615714
ENSMUSG00000034959	Rubcnl	RUN and cysteine rich domain containing beclin 1 interacting protein like	46.1012	92.0011	0.506459	-0.981483	0.0897661	0.615714
ENSMUSG00000074284	Gm10658	predicted gene 10658	17.5293	45.1216	0.401749	-1.31564	0.0898206	0.615883
ENSMUSG00000037361	Sf3b6	splicing factor 3B, subunit 6	408.295	690.341	0.592031	-0.756255	0.090108	0.617029
ENSMUSG00000032387	Rbpms2	RNA binding protein with multiple splicing 2	544.584	989.952	0.550566	-0.861013	0.0903994	0.618616
ENSMUSG00000003623	Crot	carnitine O-octanoyltransferase	1079.79	1801.51	0.5996	-0.737928	0.0905369	0.618907
ENSMUSG00000030149	Klrk1	killer cell lectin-like receptor subfamily K, member 1	54.8915	292.79	0.190243	-2.39409	0.0906266	0.618907
ENSMUSG00000085175	Gm11423	predicted gene 11423	12.9796	36.0119	0.377706	-1.40466	0.090776	0.618964
ENSMUSG00000032021	Crtam	cytotoxic and regulatory T cell molecule	2.11715	14.7752	0.197598	-2.33936	0.090727	0.618964
ENSMUSG00000024180	Tmem8	transmembrane protein 8 (five membrane-spanning domains)	994.677	1824.94	0.545296	-0.874888	0.0910851	0.619022
ENSMUSG00000001604	Tcea3	transcription elongation factor A (SII), 3	588.369	1177.95	0.499911	-1.00026	0.0910497	0.619022
ENSMUSG00000034858	Fam214a	family with sequence similarity 214, member A	987.552	1606.49	0.614965	-0.701425	0.0910413	0.619022
ENSMUSG00000025545	Clybl	citrate lyase beta like	399.26	689.749	0.579459	-0.787222	0.0912231	0.619107
ENSMUSG00000035376	Hacd2	3-hydroxyacyl-CoA dehydratase 2	187.931	343.873	0.547828	-0.868206	0.0915411	0.620041
ENSMUSG00000026117	Zap70	zeta-chain (TCR) associated protein kinase	28.2694	250.816	0.116233	-3.1049	0.0916578	0.620529
ENSMUSG00000026069	Il1rl1	interleukin 1 receptor-like 1	85.6001	397.926	0.217083	-2.20368	0.0918655	0.621216
ENSMUSG00000091679	Vmn2r96	vomeronasal 2, receptor 96	0	16.6228	0.0567448	-4.13937	0.0919431	0.621333
ENSMUSG00000022372	Sla	src-like adaptor	311.782	955.537	0.326994	-1.61266	0.0922082	0.622307
ENSMUSG00000022708	Zbtb20	zinc finger and BTB domain containing 20	9624.93	16082	0.598516	-0.740538	0.0924089	0.623049
ENSMUSG00000086529	Acss2os	acyl-CoA synthetase short-chain family member 2, opposite strand	0	6.16537	0.13956	-2.84104	0.0925282	0.623649
ENSMUSG00000020383	Il13	interleukin 13	1.23555	13.6427	0.152673	-2.71148	0.0926182	0.624051
ENSMUSG00000004626	Stxbp2	syntaxin binding protein 2	653.132	1098.67	0.594844	-0.749417	0.0927636	0.624394
ENSMUSG00000034226	Rhov	ras homolog family member V	19.8459	47.172	0.43274	-1.20843	0.0929208	0.624808
ENSMUSG00000070868	Skint3	selection and upkeep of intraepithelial T cells 3	8.39139	61.846	0.149435	-2.74241	0.0929428	0.624808
ENSMUSG00000061838	Suclg2	succinate-Coenzyme A ligase, GDP-forming, beta subunit	985.815	1628.9	0.605445	-0.723931	0.0930458	0.625296
ENSMUSG00000026070	Il18r1	interleukin 18 receptor 1	97.2989	605.961	0.161953	-2.62636	0.0932414	0.625366
ENSMUSG00000076919	Traj9	T cell receptor alpha joining 9	0.431151	8.62158	0.148744	-2.7491	0.0932954	0.625366
ENSMUSG00000067613	Krt83	keratin 83	4.98079	33.0706	0.175541	-2.51012	0.0932797	0.625366
ENSMUSG00000085358	Gm14437	predicted gene 14437	7.97954	36.04	0.242428	-2.04437	0.0931619	0.625366
ENSMUSG00000027761	Aadac	arylacetamide deacetylase	307.193	525.903	0.584914	-0.773704	0.0932186	0.625366
ENSMUSG00000027984	Hadh	hydroxyacyl-Coenzyme A dehydrogenase	2321.62	4174.12	0.556301	-0.846064	0.09336	0.625366
ENSMUSG00000022696	Sidt1	SID1 transmembrane family, member 1	4.2536	46.9005	0.109677	-3.18866	0.0936351	0.626241
ENSMUSG00000052962	Mrpl35	mitochondrial ribosomal protein L35	268.872	471.034	0.571722	-0.806613	0.0937097	0.626486
ENSMUSG00000028385	Snx30	sorting nexin family member 30	430.625	770.426	0.559516	-0.837749	0.0937533	0.626574
ENSMUSG00000093402	Gm18588	predicted gene, 18588	348.815	569.052	0.613655	-0.704501	0.0942633	0.629377
ENSMUSG00000081772	Gm13131	predicted gene 13131	16.2551	39.7399	0.423543	-1.23942	0.0942644	0.629377
ENSMUSG00000062580	Timm17a	translocase of inner mitochondrial membrane 17a	224.36	396.826	0.56648	-0.819904	0.0944578	0.629407
ENSMUSG00000039095	En2	engrailed 2	0	7.06306	0.124022	-3.01133	0.0945153	0.629407
ENSMUSG00000050241	Klre1	killer cell lectin-like receptor family E member 1	5.0966	40.3029	0.147607	-2.76017	0.0943191	0.629407
ENSMUSG00000030815	Phkg2	phosphorylase kinase, gamma 2 (testis)	159.391	283.659	0.56345	-0.82764	0.0944377	0.629407
ENSMUSG00000086140	Hnf1aos2	HNF1 homeobox A, opposite strand 2	2.47109	16.215	0.201631	-2.31021	0.0946188	0.629701
ENSMUSG00000081643	Gm11605	predicted gene 11605	238.144	410.312	0.581419	-0.782351	0.094768	0.630491
ENSMUSG00000027363	Usp8	ubiquitin specific peptidase 8	2848.88	4703.87	0.605729	-0.723255	0.0948234	0.630655
ENSMUSG00000051998	Lax1	lymphocyte transmembrane adaptor 1	26.8023	180.458	0.153216	-2.70636	0.0952331	0.631282
ENSMUSG00000059406	Tmprss9	transmembrane protease, serine 9	5.46985	35.609	0.176728	-2.5004	0.0951307	0.631282
ENSMUSG00000034833	Tespa1	thymocyte expressed, positive selection associated 1	13.7454	141.19	0.103703	-3.26948	0.0952687	0.631282
ENSMUSG00000064427	Gm22748	predicted gene, 22748	112.132	344.493	0.32745	-1.61065	0.0951914	0.631282
ENSMUSG00000035790	Cep19	centrosomal protein 19	229.528	410.151	0.560689	-0.834729	0.0954013	0.631282
ENSMUSG00000044763	Trmt10c	tRNA methyltransferase 10C	182.172	316.902	0.57619	-0.795384	0.0954389	0.631282
ENSMUSG00000027615	Hps3	HPS3, biogenesis of lysosomal organelles complex 2 subunit 1	448.618	733.676	0.611994	-0.70841	0.0954247	0.631282
ENSMUSG00000038526	Car14	carbonic anhydrase 14	320.411	543.064	0.59076	-0.759356	0.0953913	0.631282
ENSMUSG00000051124	Gimap9	GTPase, IMAP family member 9	196.348	326.005	0.603503	-0.728568	0.0949749	0.631282
ENSMUSG00000040370	Etfrf1	electron transfer flavoprotein regulatory factor 1	270.757	476.04	0.569674	-0.811792	0.094996	0.631282
ENSMUSG00000032093	Cd3e	CD3 antigen, epsilon polypeptide	42.4653	347.927	0.124568	-3.00499	0.0953372	0.631282
ENSMUSG00000050592	Fam78a	family with sequence similarity 78, member A	64.6858	177.832	0.367305	-1.44495	0.0956694	0.631995
ENSMUSG00000073494	Sh2d1b2	SH2 domain containing 1B2	0	6.01567	0.142538	-2.81058	0.095924	0.632071
ENSMUSG00000022479	Vdr	vitamin D (1,25-dihydroxyvitamin D3) receptor	2180.02	3585.66	0.608093	-0.717637	0.0960185	0.632071
ENSMUSG00000022987	Zfp641	zinc finger protein 641	110.671	294.324	0.378131	-1.40304	0.0959949	0.632071
ENSMUSG00000053799	Exoc6	exocyst complex component 6	931.071	1524.99	0.610799	-0.71123	0.095867	0.632071
ENSMUSG00000012123	Crybg2	crystallin beta-gamma domain containing 2	37.4266	157.443	0.242526	-2.04379	0.0958652	0.632071
ENSMUSG00000030724	Cd19	CD19 antigen	7.07863	59.2335	0.134122	-2.89838	0.0960171	0.632071
ENSMUSG00000035936	Aldh5a1	aldhehyde dehydrogenase family 5, subfamily A1	380.997	649.175	0.58753	-0.767266	0.0960524	0.632092
ENSMUSG00000001588	Acap1	ArfGAP with coiled-coil, ankyrin repeat and PH domains 1	37.0727	306.482	0.123821	-3.01367	0.096323	0.633594
ENSMUSG00000087141	Plcxd2	phosphatidylinositol-specific phospholipase C, X domain containing 2	109.088	330.665	0.331925	-1.59107	0.0966661	0.634716
ENSMUSG00000085672	Gm16193	predicted gene 16193	0.411848	7.96576	0.157471	-2.66684	0.096667	0.634716
ENSMUSG00000027130	Slc12a6	solute carrier family 12, member 6	1779.23	2867.56	0.620598	-0.688268	0.0967222	0.634792
ENSMUSG00000030114	Klrg1	killer cell lectin-like receptor subfamily G, member 1	0	8.461	0.105697	-3.24199	0.0967403	0.634792
ENSMUSG00000050645	Defb19	defensin beta 19	0.823697	9.56242	0.172659	-2.534	0.0968045	0.634809
ENSMUSG00000060376	Bckdha	branched chain ketoacid dehydrogenase E1, alpha polypeptide	1284.48	2163.67	0.593847	-0.751836	0.0967849	0.634809
ENSMUSG00000028988	Ctnnbip1	catenin beta interacting protein 1	112.621	200.452	0.564009	-0.82621	0.0969299	0.635429
ENSMUSG00000030087	Klf15	Kruppel-like factor 15	562.43	1355.02	0.415502	-1.26707	0.0970389	0.635941
ENSMUSG00000020402	Vdac1	voltage-dependent anion channel 1	3400.78	5635.03	0.603577	-0.728391	0.0971444	0.63643
ENSMUSG00000027367	Stard7	START domain containing 7	1042.93	1734.19	0.601619	-0.733077	0.097407	0.637542
ENSMUSG00000043592	Unc5cl	unc-5 family C-terminal like	0	6.20718	0.138751	-2.84944	0.0978016	0.638703
ENSMUSG00000089818	Gm15950	predicted gene 15950	7.96024	25.9311	0.332709	-1.58767	0.0978748	0.63896
ENSMUSG00000086600	C030005K06Rik	RIKEN cDNA C030005K06 gene	93.9915	315.104	0.300507	-1.73453	0.0979029	0.63896
ENSMUSG00000026098	Pms1	postmeiotic segregation increased 1 (S. cerevisiae)	95.6322	167.923	0.572047	-0.805794	0.0979705	0.639199
ENSMUSG00000040498	Igsf23	immunoglobulin superfamily, member 23	1.686	12.0728	0.205464	-2.28304	0.0980433	0.639211
ENSMUSG00000006529	Itih1	inter-alpha trypsin inhibitor, heavy chain 1	34.4086	72.2126	0.48364	-1.04799	0.0982772	0.639386
ENSMUSG00000021947	Cryl1	crystallin, lambda 1	781.616	1561.22	0.500964	-0.997221	0.0982688	0.639386
ENSMUSG00000082141	Gm11212	predicted gene 11212	0.431151	7.85804	0.161565	-2.62981	0.098247	0.639386
ENSMUSG00000079495	Nat8f6	N-acetyltransferase 8 (GCN5-related) family member 6	47.6521	288.914	0.167816	-2.57505	0.0982221	0.639386
ENSMUSG00000002957	Ap2a2	adaptor-related protein complex 2, alpha 2 subunit	1787.68	2898.5	0.616892	-0.69691	0.098227	0.639386
ENSMUSG00000049653	Spatc1	spermatogenesis and centriole associated 1	2.47109	14.4991	0.223954	-2.15872	0.0986171	0.641183
ENSMUSG00000091952	Gm17709	predicted gene, 17709	56.7963	113.025	0.506874	-0.9803	0.0987012	0.641324
ENSMUSG00000016018	Skiv2l2	superkiller viralicidic activity 2-like 2 (S. cerevisiae)	779.305	1293.51	0.602782	-0.730292	0.0987665	0.641546
ENSMUSG00000002033	Cd3g	CD3 antigen, gamma polypeptide	52.2081	404.581	0.13119	-2.93027	0.0990147	0.641829
ENSMUSG00000015806	Qdpr	quinoid dihydropteridine reductase	949.052	1789.12	0.530721	-0.913975	0.0991264	0.642061
ENSMUSG00000069805	Fbp1	fructose bisphosphatase 1	3447.99	7648.56	0.450874	-1.1492	0.0995071	0.643717
ENSMUSG00000074210	E130208F15Rik	RIKEN cDNA E130208F15 gene	12.4713	35.52	0.368874	-1.4388	0.099579	0.643778
ENSMUSG00000048578	Mlec	malectin	6216.47	10584.1	0.587381	-0.76763	0.0998314	0.644802
ENSMUSG00000048371	Pdp2	pyruvate dehyrogenase phosphatase catalytic subunit 2	825.812	1715.53	0.481677	-1.05386	0.10006	0.645471
ENSMUSG00000037747	Phyhipl	phytanoyl-CoA hydroxylase interacting protein-like	370.354	633.848	0.584949	-0.773617	0.100195	0.645815
ENSMUSG00000056938	Acbd4	acyl-Coenzyme A binding domain containing 4	425.58	767.907	0.554787	-0.849994	0.100403	0.646263
ENSMUSG00000045659	Plekha7	pleckstrin homology domain containing, family A member 7	1090.38	1858.06	0.587059	-0.768422	0.100461	0.646434
ENSMUSG00000021065	Fut8	fucosyltransferase 8	603.221	995.918	0.606089	-0.722398	0.100841	0.646659
ENSMUSG00000045316	Fahd1	fumarylacetoacetate hydrolase domain containing 1	360.38	809.676	0.445776	-1.16561	0.100705	0.646659
ENSMUSG00000029560	Snx8	sorting nexin 8	306.485	566.704	0.54163	-0.884621	0.100773	0.646659
ENSMUSG00000060181	Slc35e3	solute carrier family 35, member E3	188.44	348.413	0.542164	-0.883198	0.101359	0.64845
ENSMUSG00000051431	Gpr87	G protein-coupled receptor 87	0	6.05748	0.141694	-2.81915	0.101256	0.64845
ENSMUSG00000004446	Bid	BH3 interacting domain death agonist	314.915	703.279	0.448566	-1.15661	0.101358	0.64845
ENSMUSG00000091784	Gm17022	predicted gene 17022	5.41194	22.2872	0.275341	-1.86071	0.101372	0.64845
ENSMUSG00000010760	Phlda2	pleckstrin homology like domain, family A, member 2	22.6452	54.5776	0.425444	-1.23296	0.101526	0.649031
ENSMUSG00000070291	Ddx43	DEAD (Asp-Glu-Ala-Asp) box polypeptide 43	2.47109	26.7091	0.125269	-2.9969	0.101668	0.649132
ENSMUSG00000038286	Bphl	biphenyl hydrolase-like (serine hydrolase, breast epithelial mucin-associated antigen)	636.041	1207.72	0.527039	-0.924019	0.101884	0.649723
ENSMUSG00000002797	Ggct	gamma-glutamyl cyclotransferase	157.705	311.903	0.507204	-0.979363	0.102005	0.649869
ENSMUSG00000044647	Csrnp3	cysteine-serine-rich nuclear protein 3	62.4078	173.458	0.363455	-1.46015	0.102416	0.650678
ENSMUSG00000076864	Trdv1	T cell receptor delta variable 1	0	13.8933	0.0671445	-3.89659	0.102817	0.651926
ENSMUSG00000087590	Epb41l4aos	erythrocyte membrane protein band 4.1 like 4a, opposite strand	26.9374	60.8487	0.451705	-1.14655	0.102951	0.651926
ENSMUSG00000000876	Pxmp4	peroxisomal membrane protein 4	463.901	831.084	0.558719	-0.839806	0.102968	0.651926
ENSMUSG00000084215	Gm11814	predicted gene 11814	40.1937	81.2989	0.500538	-0.998447	0.102815	0.651926
ENSMUSG00000028744	Pqlc2	PQ loop repeat containing 2	90.3426	214.336	0.424186	-1.23723	0.102872	0.651926
ENSMUSG00000040473	Cfap69	cilia and flagella associated protein 69	101.327	222.893	0.457036	-1.12962	0.102835	0.651926
ENSMUSG00000068130	Zfp442	zinc finger protein 442	34.6016	89.7753	0.392195	-1.35036	0.103135	0.652178
ENSMUSG00000005540	Fcer2a	Fc receptor, IgE, low affinity II, alpha polypeptide	5.78518	34.6037	0.190575	-2.39157	0.103159	0.652178
ENSMUSG00000031787	Katnb1	katanin p80 (WD40-containing) subunit B 1	199.501	328.717	0.608102	-0.717616	0.103076	0.652178
ENSMUSG00000050350	Gpr18	G protein-coupled receptor 18	67.9741	124.646	0.548956	-0.865237	0.103202	0.652248
ENSMUSG00000028653	Trit1	tRNA isopentenyltransferase 1	113.696	204.524	0.558064	-0.841498	0.10329	0.652294
ENSMUSG00000063455	D630045J12Rik	RIKEN cDNA D630045J12 gene	904.585	1585.44	0.570828	-0.808872	0.103296	0.652294
ENSMUSG00000070000	Fcho1	FCH domain only 1	27.9027	124.324	0.230625	-2.11638	0.103453	0.652378
ENSMUSG00000026692	Fmo4	flavin containing monooxygenase 4	162.261	350.376	0.464635	-1.10583	0.103709	0.652472
ENSMUSG00000024537	Psmg2	proteasome (prosome, macropain) assembly chaperone 2	56.3201	107.868	0.52651	-0.925467	0.103633	0.652472
ENSMUSG00000025075	Habp2	hyaluronic acid binding protein 2	1131.32	2027.4	0.558233	-0.841061	0.103915	0.652472
ENSMUSG00000084760	Gm15472	predicted gene 15472	16.1779	152.846	0.111657	-3.16286	0.103853	0.652472
ENSMUSG00000027965	Olfm3	olfactomedin 3	103.837	183.907	0.566972	-0.818651	0.103884	0.652472
ENSMUSG00000028266	Lmo4	LIM domain only 4	420.625	720.885	0.584061	-0.77581	0.103934	0.652472
ENSMUSG00000028528	Dnajc6	DnaJ heat shock protein family (Hsp40) member C6	220.043	429.337	0.51365	-0.961142	0.103898	0.652472
ENSMUSG00000030104	Edem1	ER degradation enhancer, mannosidase alpha-like 1	836.925	1380.03	0.606738	-0.720856	0.103736	0.652472
ENSMUSG00000018012	Rac3	RAS-related C3 botulinum substrate 3	31.0752	71.742	0.440944	-1.18133	0.104096	0.652522
ENSMUSG00000049580	Tsku	tsukushi, small leucine rich proteoglycan	53.8813	189.816	0.287614	-1.7978	0.104101	0.652522
ENSMUSG00000004789	Dlst	dihydrolipoamide S-succinyltransferase (E2 component of 2-oxo-glutarate complex)	2566.61	4172.76	0.615179	-0.700922	0.104808	0.654411
ENSMUSG00000038462	Uqcrfs1	ubiquinol-cytochrome c reductase, Rieske iron-sulfur polypeptide 1	1752.59	2918.26	0.600697	-0.735292	0.105112	0.655274
ENSMUSG00000025889	Snca	synuclein, alpha	40.3996	89.8223	0.45583	-1.13343	0.105089	0.655274
ENSMUSG00000022253	Nadk2	NAD kinase 2, mitochondrial	761.184	1291.5	0.589697	-0.761955	0.10534	0.656189
ENSMUSG00000083380	Gm3244	predicted pseudogene 3244	21.2745	53.3549	0.409797	-1.28702	0.10541	0.656335
ENSMUSG00000022876	Samsn1	SAM domain, SH3 domain and nuclear localization signals, 1	131.321	558.922	0.236321	-2.08118	0.105487	0.656398
ENSMUSG00000024388	Myo7b	myosin VIIB	915.016	1684.48	0.543476	-0.879713	0.105494	0.656398
ENSMUSG00000046010	Zfp830	zinc finger protein 830	289.651	497.993	0.582475	-0.779731	0.105716	0.65649
ENSMUSG00000022580	Rhpn1	rhophilin, Rho GTPase binding protein 1	54.145	172.115	0.318545	-1.65043	0.105738	0.65649
ENSMUSG00000002076	Hsf2bp	heat shock transcription factor 2 binding protein	15.8626	47.986	0.344232	-1.53855	0.105754	0.65649
ENSMUSG00000030742	Lat	linker for activation of T cells	22.0724	175.173	0.130964	-2.93275	0.105741	0.65649
ENSMUSG00000090188	Gm7418	predicted pseudogene 7418	0.862302	10.4755	0.162285	-2.6234	0.105593	0.65649
ENSMUSG00000024120	Lrpprc	leucine-rich PPR-motif containing	1410.41	2296.28	0.614382	-0.702793	0.106105	0.656925
ENSMUSG00000024694	Keg1	kidney expressed gene 1	4155.05	9462.36	0.439173	-1.18714	0.106101	0.656925
ENSMUSG00000085444	Gm13936	predicted gene 13936	17.3684	47.1528	0.38146	-1.3904	0.106143	0.656925
ENSMUSG00000050600	Zfp831	zinc finger protein 831	27.8834	315.357	0.0912999	-3.45324	0.105856	0.656925
ENSMUSG00000078487	Ankrd65	ankyrin repeat domain 65	9.64624	30.196	0.34127	-1.55102	0.105977	0.656925
ENSMUSG00000029456	Acad10	acyl-Coenzyme A dehydrogenase family, member 10	260.12	483.56	0.538881	-0.891961	0.106128	0.656925
ENSMUSG00000053044	Cd8b1	CD8 antigen, beta chain 1	12.5485	116.148	0.115653	-3.11213	0.10601	0.656925
ENSMUSG00000015672	Mrpl32	mitochondrial ribosomal protein L32	141.064	254.916	0.555121	-0.849125	0.106475	0.657829
ENSMUSG00000029016	Clcn6	chloride channel, voltage-sensitive 6	336.556	579.192	0.581801	-0.781401	0.106654	0.658095
ENSMUSG00000040570	Rundc3b	RUN domain containing 3B	12.6836	33.3449	0.398417	-1.32765	0.106692	0.658095
ENSMUSG00000016756	Cmah	cytidine monophospho-N-acetylneuraminic acid hydroxylase	551.728	932.156	0.592321	-0.755549	0.107015	0.658364
ENSMUSG00000022262	Dnah5	dynein, axonemal, heavy chain 5	12.9024	34.6608	0.389852	-1.359	0.106989	0.658364
ENSMUSG00000052142	Rasal3	RAS protein activator like 3	84.9178	561.701	0.152688	-2.71134	0.10723	0.658899
ENSMUSG00000029553	Tfec	transcription factor EC	61.3138	156.994	0.394407	-1.34224	0.107306	0.658971
ENSMUSG00000092371	Gm20511	predicted gene 20511	1.25485	12.9168	0.162023	-2.62573	0.107443	0.659176
ENSMUSG00000032293	Ireb2	iron responsive element binding protein 2	850.226	1364.03	0.623597	-0.681314	0.107563	0.659176
ENSMUSG00000042345	Ubash3a	ubiquitin associated and SH3 domain containing, A	8.70673	127.797	0.0753646	-3.72997	0.107828	0.660408
ENSMUSG00000047905	Gm8566	predicted pseudogene 8566	1089.17	1761.78	0.618439	-0.693298	0.107885	0.660561
ENSMUSG00000050730	Arhgap42	Rho GTPase activating protein 42	481.842	1216.86	0.396466	-1.33473	0.107954	0.660784
ENSMUSG00000000384	Tbrg4	transforming growth factor beta regulated gene 4	282.18	484.982	0.582696	-0.779184	0.108338	0.660971
ENSMUSG00000021486	Prelid1	PRELI domain containing 1	924.546	1499.77	0.616714	-0.697326	0.108155	0.660971
ENSMUSG00000034795	Ccdc122	coiled-coil domain containing 122	44.2543	92.2094	0.485512	-1.04242	0.108299	0.660971
ENSMUSG00000042351	Grap2	GRB2-related adaptor protein 2	57.8388	269.148	0.217803	-2.19891	0.10818	0.660971
ENSMUSG00000032845	Alpk2	alpha-kinase 2	0.823697	9.35869	0.176055	-2.5059	0.108332	0.660971
ENSMUSG00000055471	Alk	anaplastic lymphoma kinase	1.64739	12.9824	0.189338	-2.40097	0.108556	0.661914
ENSMUSG00000027908	Tchhl1	trichohyalin-like 1	20.5087	46.8151	0.449832	-1.15254	0.108792	0.662172
ENSMUSG00000030774	Pak1	p21 protein (Cdc42/Rac)-activated kinase 1	341.956	560.968	0.610276	-0.712466	0.108683	0.662172
ENSMUSG00000022092	Ppp3cc	protein phosphatase 3, catalytic subunit, gamma isoform	138.4	270.949	0.512596	-0.964105	0.108913	0.662522
ENSMUSG00000032413	Rasa2	RAS p21 protein activator 2	432.716	674.448	0.642116	-0.639094	0.108882	0.662522
ENSMUSG00000076907	Traj22	T cell receptor alpha joining 22	0.431151	28.4008	0.0486772	-4.36061	0.109278	0.663125
ENSMUSG00000022015	Tnfsf11	tumor necrosis factor (ligand) superfamily, member 11	4.60754	44.0468	0.124483	-3.00599	0.109302	0.663125
ENSMUSG00000007038	Neu1	neuraminidase 1	2110.08	3840.66	0.549522	-0.863751	0.109206	0.663125
ENSMUSG00000085694	Gm14967	predicted gene 14967	6.33215	21.1718	0.330698	-1.59642	0.109511	0.663314
ENSMUSG00000003559	As3mt	arsenic (+3 oxidation state) methyltransferase	287.946	495.847	0.581559	-0.782004	0.109466	0.663314
ENSMUSG00000033735	Spr	sepiapterin reductase	623.337	1042.62	0.598242	-0.741198	0.109453	0.663314
ENSMUSG00000039016	Timm8b	translocase of inner mitochondrial membrane 8B	252.707	437.902	0.57805	-0.790735	0.109785	0.66429
ENSMUSG00000029664	Tfpi2	tissue factor pathway inhibitor 2	32.7419	67.7401	0.490861	-1.02661	0.109927	0.664762
ENSMUSG00000025507	Pidd1	p53 induced death domain protein 1	25.1356	53.7478	0.477381	-1.06679	0.109918	0.664762
ENSMUSG00000026188	Tmem169	transmembrane protein 169	38.038	107.491	0.359825	-1.47463	0.11045	0.666143
ENSMUSG00000042700	Sipa1l1	signal-induced proliferation-associated 1 like 1	1799.85	2893.03	0.622264	-0.684401	0.111107	0.666143
ENSMUSG00000076754	Trgv2	T cell receptor gamma variable 2	2.47109	40.8843	0.0828734	-3.59295	0.110883	0.666143
ENSMUSG00000022295	Atp6v1c1	ATPase, H+ transporting, lysosomal V1 subunit C1	696.955	1152.38	0.605141	-0.724657	0.110678	0.666143
ENSMUSG00000080461	Gm22488	predicted gene, 22488	0	5.94643	0.143959	-2.79627	0.111059	0.666143
ENSMUSG00000047347	Tdg-ps	thymine DNA glycosylase, pseudogene	0.431151	8.83635	0.145496	-2.78095	0.11112	0.666143
ENSMUSG00000023019	Gpd1	glycerol-3-phosphate dehydrogenase 1 (soluble)	1512.99	3251.56	0.465478	-1.10322	0.110827	0.666143
ENSMUSG00000030301	Ccdc91	coiled-coil domain containing 91	839.268	1351.87	0.621099	-0.687105	0.110641	0.666143
ENSMUSG00000050357	Carmil2	capping protein regulator and myosin 1 linker 2	33.9709	132.641	0.261678	-1.93414	0.110984	0.666143
ENSMUSG00000042293	Gm5617	predicted gene 5617	57.073	114.23	0.503973	-0.988581	0.110894	0.666143
ENSMUSG00000032309	Fbxo22	F-box protein 22	613.685	991.168	0.619537	-0.690737	0.11101	0.666143
ENSMUSG00000032314	Etfa	electron transferring flavoprotein, alpha polypeptide	869.545	1434.16	0.606586	-0.721217	0.110779	0.666143
ENSMUSG00000026094	Stk17b	serine/threonine kinase 17b (apoptosis-inducing)	368.694	1061.75	0.347865	-1.5234	0.111247	0.666322
ENSMUSG00000033819	Ppp1r16a	protein phosphatase 1, regulatory (inhibitor) subunit 16A	273.769	460.939	0.594817	-0.749483	0.11135	0.666322
ENSMUSG00000085205	Gm13185	predicted gene 13185	13.0954	44.4332	0.310245	-1.68852	0.111328	0.666322
ENSMUSG00000029634	Rnf6	ring finger protein (C3H2C3 type) 6	1416.55	2263.31	0.626041	-0.675671	0.111339	0.666322
ENSMUSG00000030798	Cd37	CD37 antigen	67.8969	344.267	0.199547	-2.3252	0.111424	0.666572
ENSMUSG00000034639	Setmar	SET domain without mariner transposase fusion	29.209	65.9578	0.451164	-1.14828	0.111626	0.666807
ENSMUSG00000063765	Chadl	chondroadherin-like	39.6275	79.2377	0.506339	-0.981825	0.111804	0.667679
ENSMUSG00000037703	Lzts3	leucine zipper, putative tumor suppressor family member 3	1146.35	1955.73	0.58636	-0.770142	0.111936	0.668271
ENSMUSG00000032246	Calml4	calmodulin-like 4	964.386	2511.4	0.384249	-1.37989	0.112844	0.672135
ENSMUSG00000066000	Zfp979	zinc finger protein 979	55.8117	103.636	0.542946	-0.881118	0.11292	0.672286
ENSMUSG00000034427	Myo15b	myosin XVB	910.647	2071.42	0.439895	-1.18477	0.113006	0.672324
ENSMUSG00000020321	Mdh1	malate dehydrogenase 1, NAD (soluble)	5490.24	8911.54	0.616126	-0.698704	0.113054	0.672411
ENSMUSG00000019951	Uhrf1bp1l	UHRF1 (ICBP90) binding protein 1-like	1330.58	2234.24	0.595723	-0.747286	0.113266	0.673093
ENSMUSG00000084068	Gm11573	predicted gene 11573	0.823697	10.0155	0.165557	-2.5946	0.113237	0.673093
ENSMUSG00000025533	Asl	argininosuccinate lyase	1169.13	2299.46	0.508649	-0.975256	0.113356	0.673235
ENSMUSG00000026399	Cd55	CD55 molecule, decay accelerating factor for complement	114.043	197.894	0.578415	-0.789824	0.113501	0.673576
ENSMUSG00000036898	Zfp157	zinc finger protein 157	130.247	219.052	0.596435	-0.745564	0.113511	0.673576
ENSMUSG00000045871	Slitrk6	SLIT and NTRK-like family, member 6	4.60754	18.6182	0.285834	-1.80675	0.113692	0.674068
ENSMUSG00000026348	Acmsd	amino carboxymuconate semialdehyde decarboxylase	933.852	1911.3	0.488863	-1.0325	0.113875	0.674183
ENSMUSG00000061119	Prcp	prolylcarboxypeptidase (angiotensinase C)	408.417	667.607	0.612344	-0.707586	0.113922	0.674264
ENSMUSG00000026357	Rgs18	regulator of G-protein signaling 18	5.13521	22.3606	0.26263	-1.9289	0.114311	0.675958
ENSMUSG00000005547	Cyp2a5	cytochrome P450, family 2, subfamily a, polypeptide 5	667.219	1560.42	0.427955	-1.22447	0.114362	0.675958
ENSMUSG00000067702	Tuba3a	tubulin, alpha 3A	0	6.11101	0.140627	-2.83005	0.114864	0.676922
ENSMUSG00000037759	Ptger2	prostaglandin E receptor 2 (subtype EP2)	5.9396	20.4492	0.323537	-1.628	0.115006	0.677076
ENSMUSG00000076914	Traj15	T cell receptor alpha joining 15	1.7246	18.0119	0.143311	-2.80278	0.114958	0.677076
ENSMUSG00000048787	Dcun1d3	DCN1, defective in cullin neddylation 1, domain containing 3 (S. cerevisiae)	323.377	531.611	0.609032	-0.71541	0.115429	0.678632
ENSMUSG00000000056	Narf	nuclear prelamin A recognition factor	527.918	889.726	0.593805	-0.751939	0.115747	0.6796
ENSMUSG00000027076	Timm10	translocase of inner mitochondrial membrane 10	83.3025	147.062	0.569373	-0.812555	0.116122	0.680053
ENSMUSG00000028124	Gclm	glutamate-cysteine ligase, modifier subunit	1098.56	1957.92	0.561311	-0.833129	0.116116	0.680053
ENSMUSG00000074516	Gm10709	predicted gene 10709	65.5158	125.215	0.527004	-0.924114	0.116033	0.680053
ENSMUSG00000091412	Gm2895	predicted gene 2895	28.3467	66.0527	0.437666	-1.1921	0.116183	0.680216
ENSMUSG00000087535	Zmiz1os1	Zmiz1 opposite strand 1	51.8155	107.836	0.485276	-1.04312	0.116259	0.680471
ENSMUSG00000026156	B3gat2	beta-1,3-glucuronyltransferase 2 (glucuronosyltransferase S)	369.53	654.514	0.565251	-0.823037	0.116501	0.681498
ENSMUSG00000085154	C130046K22Rik	RIKEN cDNA C130046K22 gene	11.9371	34.1229	0.368338	-1.4409	0.116639	0.681665
ENSMUSG00000022571	Pycrl	pyrroline-5-carboxylate reductase-like	189.482	314.85	0.603076	-0.729588	0.116728	0.681665
ENSMUSG00000028518	Prkaa2	protein kinase, AMP-activated, alpha 2 catalytic subunit	1492.23	2933.64	0.508831	-0.974742	0.116705	0.681665
ENSMUSG00000060032	H2afj	H2A histone family, member J	583.028	984.311	0.592735	-0.754541	0.116601	0.681665
ENSMUSG00000028964	Park7	Parkinson disease (autosomal recessive, early onset) 7	1755.98	2807.93	0.625499	-0.67692	0.116797	0.681871
ENSMUSG00000053436	Mapk14	mitogen-activated protein kinase 14	1098.5	1744.26	0.629994	-0.66659	0.116895	0.682249
ENSMUSG00000022752	Tomm70a	translocase of outer mitochondrial membrane 70 homolog A (yeast)	873.354	1399.23	0.624438	-0.679371	0.117022	0.682325
ENSMUSG00000028307	Aldob	aldolase B, fructose-bisphosphate	25401.8	53448.4	0.475269	-1.07318	0.11699	0.682325
ENSMUSG00000076475	Trbv19	T cell receptor beta, variable 19	0	6.62918	0.131076	-2.93153	0.117075	0.682333
ENSMUSG00000030745	Il21r	interleukin 21 receptor	105.343	381.636	0.277921	-1.84725	0.117282	0.683227
ENSMUSG00000032114	Slc37a4	solute carrier family 37 (glucose-6-phosphate transporter), member 4	687.226	1167.2	0.589132	-0.763336	0.1173	0.683227
ENSMUSG00000072825	Cep170b	centrosomal protein 170B	1433.11	2351.57	0.609593	-0.714082	0.117551	0.683612
ENSMUSG00000091575	2010016I18Rik	RIKEN cDNA 2010016I18 gene	4.60754	34.304	0.158836	-2.65439	0.117873	0.684086
ENSMUSG00000030781	Slc5a2	solute carrier family 5 (sodium/glucose cotransporter), member 2	865.382	1623.6	0.533288	-0.907012	0.117964	0.684086
ENSMUSG00000073609	D2hgdh	D-2-hydroxyglutarate dehydrogenase	184.514	323.994	0.570823	-0.808884	0.118099	0.684262
ENSMUSG00000050323	Ndufaf6	NADH dehydrogenase (ubiquinone) complex I, assembly factor 6	82.0156	150.612	0.547552	-0.868931	0.118069	0.684262
ENSMUSG00000087616	Gm14257	predicted gene 14257	2.94085	19.6822	0.190543	-2.39181	0.118174	0.684289
ENSMUSG00000025790	Slco3a1	solute carrier organic anion transporter family, member 3a1	903.676	1472.56	0.613937	-0.703837	0.11831	0.684883
ENSMUSG00000020629	Adi1	acireductone dioxygenase 1	394.221	665.137	0.593304	-0.753157	0.118549	0.685303
ENSMUSG00000030905	Crym	crystallin, mu	96.7649	304.681	0.319827	-1.64464	0.118518	0.685303
ENSMUSG00000025175	Fn3k	fructosamine 3 kinase	183.748	306.773	0.600274	-0.736308	0.118719	0.685516
ENSMUSG00000032527	Pccb	propionyl Coenzyme A carboxylase, beta polypeptide	1400.04	2295.97	0.609954	-0.713228	0.118694	0.685516
ENSMUSG00000023927	Satb1	special AT-rich sequence binding protein 1	171.502	857.146	0.201017	-2.31461	0.11877	0.685617
ENSMUSG00000018659	Pnpo	pyridoxine 5'-phosphate oxidase	236.754	401.347	0.590919	-0.758969	0.119127	0.686716
ENSMUSG00000037922	Bank1	B cell scaffold protein with ankyrin repeats 1	24.2926	138.344	0.181512	-2.46186	0.119107	0.686716
ENSMUSG00000000409	Lck	lymphocyte protein tyrosine kinase	52.2209	300.666	0.176423	-2.50289	0.119115	0.686716
ENSMUSG00000038745	Nlrp6	NLR family, pyrin domain containing 6	474.693	1424.09	0.333799	-1.58295	0.119042	0.686716
ENSMUSG00000065420	Mir142b	microRNA 142b	3.74524	25.6667	0.177947	-2.49048	0.119961	0.688238
ENSMUSG00000025869	Nop16	NOP16 nucleolar protein	182.101	305.071	0.598229	-0.74123	0.119827	0.688238
ENSMUSG00000036123	Slc9a3	solute carrier family 9 (sodium/hydrogen exchanger), member 3	1150.5	1998.97	0.575757	-0.796469	0.120461	0.688238
ENSMUSG00000005125	Ndrg1	N-myc downstream regulated gene 1	16148.2	25216.8	0.640389	-0.642979	0.120302	0.688238
ENSMUSG00000025194	Abcc2	ATP-binding cassette, sub-family C (CFTR/MRP), member 2	2092.04	4319.42	0.484454	-1.04557	0.120114	0.688238
ENSMUSG00000003379	Cd79a	CD79A antigen (immunoglobulin-associated alpha)	5.88169	24.3957	0.270979	-1.88375	0.12016	0.688238
ENSMUSG00000062007	Hsh2d	hematopoietic SH2 domain containing	0.823697	8.41852	0.193629	-2.36863	0.120084	0.688238
ENSMUSG00000037148	Arhgap10	Rho GTPase activating protein 10	776.731	1539.63	0.504813	-0.986179	0.119789	0.688238
ENSMUSG00000038775	Vill	villin-like	269.946	544.02	0.49713	-1.0083	0.119941	0.688238
ENSMUSG00000030615	Tmem126a	transmembrane protein 126A	130.575	227.746	0.5752	-0.797864	0.120682	0.688581
ENSMUSG00000085307	Gm11525	predicted gene 11525	3.3527	18.6139	0.221919	-2.17189	0.120877	0.688954
ENSMUSG00000014303	Glis2	GLIS family zinc finger 2	1190.81	1969.43	0.604848	-0.725356	0.120887	0.688954
ENSMUSG00000059639	Clec4a4	C-type lectin domain family 4, member a4	0	5.32087	0.158206	-2.66012	0.121168	0.689408
ENSMUSG00000032051	Fdx1	ferredoxin 1	261.201	449.486	0.582041	-0.780808	0.121201	0.689408
ENSMUSG00000073643	Wdfy1	WD repeat and FYVE domain containing 1	397.002	632.609	0.62815	-0.67082	0.122597	0.691112
ENSMUSG00000019872	Smpdl3a	sphingomyelin phosphodiesterase, acid-like 3A	1398.76	2305.53	0.606868	-0.720546	0.122569	0.691112
ENSMUSG00000040950	Mgl2	macrophage galactose N-acetyl-galactosamine specific lectin 2	202.307	519.87	0.390322	-1.35726	0.122621	0.691112
ENSMUSG00000034156	Tspoap1	TSPO associated protein 1	122.087	231.499	0.529408	-0.917547	0.121866	0.691112
ENSMUSG00000057219	Armc7	armadillo repeat containing 7	72.4659	149.851	0.487009	-1.03798	0.122914	0.691112
ENSMUSG00000005656	Snx6	sorting nexin 6	743.861	1314.11	0.566388	-0.820138	0.122403	0.691112
ENSMUSG00000091587	Gm17191	predicted gene 17191	0	6.1647	0.139573	-2.84091	0.122404	0.691112
ENSMUSG00000021414	Fam217a	family with sequence similarity 217, member A	29.8975	62.922	0.483363	-1.04882	0.122666	0.691112
ENSMUSG00000021371	Mcur1	mitochondrial calcium uniporter regulator 1	1104.48	1755.83	0.629248	-0.668299	0.122252	0.691112
ENSMUSG00000041625	Ggact	gamma-glutamylamine cyclotransferase	359.157	641.452	0.560597	-0.834964	0.121797	0.691112
ENSMUSG00000022150	Dab2	disabled 2, mitogen-responsive phosphoprotein	4199.91	7450.45	0.563771	-0.826819	0.122295	0.691112
ENSMUSG00000057880	Abat	4-aminobutyrate aminotransferase	1313.98	2350.3	0.559257	-0.838417	0.122452	0.691112
ENSMUSG00000037098	Rab11fip3	RAB11 family interacting protein 3 (class II)	5622.03	11340.5	0.49579	-1.0122	0.122922	0.691112
ENSMUSG00000042660	Wdr55	WD repeat domain 55	165.447	277.214	0.59827	-0.741133	0.122706	0.691112
ENSMUSG00000024661	Fth1	ferritin heavy polypeptide 1	16048.1	25351.5	0.633038	-0.659636	0.122816	0.691112
ENSMUSG00000024669	Cd5	CD5 antigen	22.761	166.759	0.141638	-2.81972	0.122365	0.691112
ENSMUSG00000079604	Gm13219	predicted gene 13219	0	5.83854	0.14623	-2.77369	0.12193	0.691112
ENSMUSG00000001999	Blvra	biliverdin reductase A	352.561	590.012	0.598229	-0.74123	0.121776	0.691112
ENSMUSG00000033068	Entpd6	ectonucleoside triphosphate diphosphohydrolase 6	121.482	209.268	0.582506	-0.779656	0.122722	0.691112
ENSMUSG00000083097	Gm14494	predicted gene 14494	279.876	475.193	0.589836	-0.761614	0.12178	0.691112
ENSMUSG00000085317	Gssos2	glutathione synthase, opposite strand 2	0.843	9.17856	0.181067	-2.46541	0.122503	0.691112
ENSMUSG00000034853	Acot11	acyl-CoA thioesterase 11	254.843	440.443	0.579561	-0.786968	0.122382	0.691112
ENSMUSG00000028982	Slc25a33	solute carrier family 25, member 33	82.9679	152.529	0.54692	-0.870599	0.122748	0.691112
ENSMUSG00000085068	Gm15895	predicted gene 15895	26.1265	66.3629	0.402692	-1.31225	0.122841	0.691112
ENSMUSG00000042787	Exog	endo/exonuclease (5'-3'), endonuclease G-like	27.1111	57.2636	0.482481	-1.05146	0.122124	0.691112
ENSMUSG00000086474	9130204K15Rik	RIKEN cDNA 9130204K15 gene	0	6.46477	0.133963	-2.9001	0.123234	0.691575
ENSMUSG00000024665	Fads2	fatty acid desaturase 2	490.459	818.136	0.599972	-0.737032	0.123295	0.691575
ENSMUSG00000076485	Trbj1-3	T cell receptor beta joining 1-3	0	5.24008	0.160254	-2.64156	0.123693	0.692487
ENSMUSG00000023861	Mpc1	mitochondrial pyruvate carrier 1	120.105	233.139	0.517236	-0.951105	0.123727	0.692489
ENSMUSG00000079563	Pglyrp2	peptidoglycan recognition protein 2	10.1353	60.6651	0.180577	-2.46931	0.123801	0.692712
ENSMUSG00000028672	Hmgcl	3-hydroxy-3-methylglutaryl-Coenzyme A lyase	748.713	1242.31	0.602999	-0.729772	0.123905	0.693107
ENSMUSG00000071267	Zfp942	zinc finger protein 942	144.082	239.251	0.603877	-0.727673	0.124078	0.693133
ENSMUSG00000035772	Mrps2	mitochondrial ribosomal protein S2	320.726	517.678	0.620281	-0.689006	0.124034	0.693133
ENSMUSG00000034762	Glis1	GLIS family zinc finger 1	119.153	333.285	0.359432	-1.47621	0.124209	0.693488
ENSMUSG00000054676	1600014C10Rik	RIKEN cDNA 1600014C10 gene	188.903	313.421	0.603977	-0.727435	0.124505	0.694763
ENSMUSG00000036273	Lrrk2	leucine-rich repeat kinase 2	2906.44	4782.21	0.607842	-0.718232	0.12477	0.695771
ENSMUSG00000055629	B4galnt4	beta-1,4-N-acetyl-galactosaminyl transferase 4	3.80315	29.5551	0.157196	-2.66936	0.124745	0.695771
ENSMUSG00000081957	Ak3l2-ps	adenylate kinase 3-like 2, pseudogene	471.038	1287.31	0.3664	-1.44851	0.12494	0.696062
ENSMUSG00000025041	Nt5c2	5'-nucleotidase, cytosolic II	1030.17	1687.85	0.610573	-0.711765	0.124982	0.696108
ENSMUSG00000023044	Csad	cysteine sulfinic acid decarboxylase	607.057	1502.73	0.404365	-1.30627	0.125558	0.697107
ENSMUSG00000068037	Mas1	MAS1 oncogene	9.36951	26.5572	0.37629	-1.41008	0.125545	0.697107
ENSMUSG00000063281	Zfp35	zinc finger protein 35	250.313	424.016	0.591303	-0.75803	0.125284	0.697107
ENSMUSG00000027957	Slc35a3	solute carrier family 35 (UDP-N-acetylglucosamine (UDP-GlcNAc) transporter), member 3	764.344	1261.41	0.606256	-0.722001	0.125394	0.697107
ENSMUSG00000029802	Abcg2	ATP-binding cassette, sub-family G (WHITE), member 2	2115.88	3505.03	0.603783	-0.727898	0.125851	0.697532
ENSMUSG00000045594	Glb1	galactosidase, beta 1	443.463	732.844	0.605664	-0.72341	0.125844	0.697532
ENSMUSG00000021932	Rnaseh2b	ribonuclease H2, subunit B	96.6426	201.691	0.481732	-1.0537	0.126277	0.698927
ENSMUSG00000003531	Dgcr6	DiGeorge syndrome critical region gene 6	261.163	445.14	0.587624	-0.767035	0.126297	0.698927
ENSMUSG00000052013	Btla	B and T lymphocyte associated	17.5486	103.5	0.177497	-2.49413	0.126333	0.698927
ENSMUSG00000027368	Dusp2	dual specificity phosphatase 2	120.594	510.266	0.237829	-2.072	0.12641	0.699027
ENSMUSG00000050075	Gpr171	G protein-coupled receptor 171	26.0944	160.97	0.16728	-2.57966	0.126423	0.699027
ENSMUSG00000024663	Rab3il1	RAB3A interacting protein (rabin3)-like 1	388.244	656.047	0.592414	-0.755323	0.126529	0.699424
ENSMUSG00000070709	Zfp974	zinc finger protein 974	65.7154	114.191	0.579171	-0.787939	0.126861	0.700507
ENSMUSG00000021594	Srd5a1	steroid 5 alpha-reductase 1	81.9061	148.227	0.55557	-0.84796	0.127581	0.700536
ENSMUSG00000045267	Tas2r119	taste receptor, type 2, member 119	0.823697	11.8393	0.14204	-2.81563	0.126978	0.700536
ENSMUSG00000033220	Rac2	RAS-related C3 botulinum substrate 2	179.173	597.802	0.300889	-1.7327	0.127065	0.700536
ENSMUSG00000024158	Hagh	hydroxyacyl glutathione hydrolase	641.433	1029.85	0.623207	-0.682217	0.127303	0.700536
ENSMUSG00000028150	Rorc	RAR-related orphan receptor gamma	177.159	311.748	0.569656	-0.811838	0.127103	0.700536
ENSMUSG00000082743	Gm12988	predicted gene 12988	111.694	185.578	0.604008	-0.727361	0.127214	0.700536
ENSMUSG00000032500	Dclk3	doublecortin-like kinase 3	708.963	1133.18	0.625972	-0.67583	0.127144	0.700536
ENSMUSG00000036814	Slc6a20a	solute carrier family 6 (neurotransmitter transporter), member 20A	37.742	72.9921	0.523596	-0.933474	0.127176	0.700536
ENSMUSG00000029545	Acads	acyl-Coenzyme A dehydrogenase, short chain	658.152	1150.46	0.572446	-0.804788	0.127799	0.701176
ENSMUSG00000044367	Slc16a13	solute carrier family 16 (monocarboxylic acid transporters), member 13	375.219	621.513	0.604355	-0.726532	0.127963	0.7017
ENSMUSG00000075297	H60b	histocompatibility 60b	12.8059	54.3736	0.249323	-2.00391	0.128276	0.702051
ENSMUSG00000025050	Pcgf6	polycomb group ring finger 6	77.942	138.259	0.566872	-0.818905	0.128205	0.702051
ENSMUSG00000002550	Uck1	uridine-cytidine kinase 1	234.734	394.426	0.596151	-0.74625	0.128402	0.702051
ENSMUSG00000018209	Stk4	serine/threonine kinase 4	935.267	1473.3	0.635059	-0.655038	0.128338	0.702051
ENSMUSG00000028545	Bend5	BEN domain containing 5	250.86	596.568	0.421476	-1.24648	0.128341	0.702051
ENSMUSG00000022401	Xpnpep3	X-prolyl aminopeptidase 3, mitochondrial	218.208	380.166	0.575099	-0.798119	0.128637	0.702964
ENSMUSG00000018102	Hist1h2bc	histone cluster 1, H2bc	1389.37	2187.53	0.6353	-0.65449	0.128851	0.703392
ENSMUSG00000033985	Tesk2	testis-specific kinase 2	116.443	204.247	0.572205	-0.805395	0.128833	0.703392
ENSMUSG00000029680	Hyal4	hyaluronoglucosaminidase 4	0	5.3207	0.15821	-2.66008	0.128799	0.703392
ENSMUSG00000021356	Irf4	interferon regulatory factor 4	90.0337	358.414	0.253284	-1.98117	0.129111	0.704244
ENSMUSG00000085772	D630024D03Rik	RIKEN cDNA D630024D03 gene	81.2112	152.574	0.535319	-0.90153	0.129635	0.704731
ENSMUSG00000091014	Gm5244	predicted pseudogene 5244	0	5.56607	0.152298	-2.71503	0.129679	0.704731
ENSMUSG00000025198	Erlin1	ER lipid raft associated 1	478.734	795.605	0.602223	-0.73163	0.129627	0.704731
ENSMUSG00000026839	Upp2	uridine phosphorylase 2	45.5478	85.6262	0.537341	-0.896091	0.129421	0.704731
ENSMUSG00000027398	Il1b	interleukin 1 beta	1962.29	3477.37	0.56443	-0.825134	0.129599	0.704731
ENSMUSG00000049103	Ccr2	chemokine (C-C motif) receptor 2	239.618	889.187	0.270301	-1.88736	0.129644	0.704731
ENSMUSG00000029438	Bcl7a	B cell CLL/lymphoma 7A	1124.39	1834.3	0.613189	-0.705595	0.12989	0.705385
ENSMUSG00000043833	2900005J15Rik	RIKEN cDNA 2900005J15 gene	19.5499	47.9839	0.419524	-1.25318	0.130192	0.705884
ENSMUSG00000076486	Trbj1-4	T cell receptor beta joining 1-4	0	5.26684	0.15957	-2.64774	0.13052	0.707004
ENSMUSG00000070691	Runx3	runt related transcription factor 3	249.876	626.448	0.399835	-1.32252	0.130687	0.707592
ENSMUSG00000076889	Traj41	T cell receptor alpha joining 41	0	7.45142	0.118323	-3.07919	0.130879	0.708013
ENSMUSG00000043931	Gimap7	GTPase, IMAP family member 7	15.9591	90.8671	0.184605	-2.43749	0.130922	0.708013
ENSMUSG00000084796	Mir142hg	Mir142 host gene (non-protein coding)	10.1353	44.7795	0.243238	-2.03956	0.131133	0.70833
ENSMUSG00000029059	Fam213b	family with sequence similarity 213, member B	53.1734	125.991	0.426591	-1.22908	0.131204	0.708532
ENSMUSG00000000340	Dbt	dihydrolipoamide branched chain transacylase E2	1139.27	1827.21	0.623707	-0.68106	0.131318	0.708691
ENSMUSG00000018819	Lsp1	lymphocyte specific 1	373.7	964.369	0.388142	-1.36534	0.131389	0.708786
ENSMUSG00000009145	Dqx1	DEAQ RNA-dependent ATPase	83.8946	143.651	0.586892	-0.768833	0.131555	0.709125
ENSMUSG00000024955	Esrra	estrogen related receptor, alpha	408.463	674.357	0.60629	-0.721919	0.131702	0.709461
ENSMUSG00000049303	Syt12	synaptotagmin XII	41.6802	80.0583	0.526537	-0.925392	0.131814	0.709777
ENSMUSG00000032376	Usp3	ubiquitin specific peptidase 3	650.641	1032.4	0.630578	-0.665253	0.13198	0.710297
ENSMUSG00000038206	Fbxo8	F-box protein 8	311.968	507.948	0.614931	-0.701505	0.132103	0.710517
ENSMUSG00000092500	Gm20400	predicted gene 20400	15.7275	64.3623	0.255919	-1.96624	0.13216	0.710522
ENSMUSG00000076523	Igkv15-103	immunoglobulin kappa chain variable 15-103	0	234.214	0.00425145	-7.87783	0.132265	0.710903
ENSMUSG00000052415	Tchh	trichohyalin	536.612	866.59	0.619661	-0.690448	0.132499	0.711418
ENSMUSG00000020189	Osbpl8	oxysterol binding protein-like 8	2305.14	3582.62	0.64352	-0.635942	0.132575	0.711462
ENSMUSG00000058351	Smim4	small integral membrane protein 4	102.698	188.779	0.546415	-0.871932	0.132657	0.71147
ENSMUSG00000039131	Gipc2	GIPC PDZ domain containing family, member 2	657.386	1252.23	0.525353	-0.928642	0.132681	0.71147
ENSMUSG00000027035	Cers6	ceramide synthase 6	597.224	956.854	0.624546	-0.67912	0.133189	0.713339
ENSMUSG00000048163	Selplg	selectin, platelet (p-selectin) ligand	303.056	814.793	0.372712	-1.42387	0.133203	0.713339
ENSMUSG00000070601	Vmn2r84	vomeronasal 2, receptor 84	0.823697	9.00593	0.182262	-2.45592	0.133567	0.713539
ENSMUSG00000085853	Gm12167	predicted gene 12167	1.27415	23.3906	0.0932389	-3.42292	0.133482	0.713539
ENSMUSG00000020601	Trib2	tribbles pseudokinase 2	508.001	799.095	0.636175	-0.652504	0.133355	0.713539
ENSMUSG00000067341	H2-Eb2	histocompatibility 2, class II antigen E beta2	8.11466	22.1847	0.393133	-1.34691	0.133447	0.713539
ENSMUSG00000038722	Bud31	BUD31 homolog	280.841	460.336	0.610924	-0.710934	0.133459	0.713539
ENSMUSG00000039771	Polr2j	polymerase (RNA) II (DNA directed) polypeptide J	153.529	261.369	0.588976	-0.763719	0.133837	0.714317
ENSMUSG00000029729	Zkscan1	zinc finger with KRAB and SCAN domains 1	2192.12	3446.99	0.636056	-0.652774	0.133901	0.714476
ENSMUSG00000042305	Tmem183a	transmembrane protein 183A	600.596	956.761	0.628127	-0.670871	0.134161	0.714933
ENSMUSG00000023915	Tnfrsf21	tumor necrosis factor receptor superfamily, member 21	1912.85	3280.88	0.583155	-0.778048	0.134092	0.714933
ENSMUSG00000054426	A930005H10Rik	RIKEN cDNA A930005H10 gene	7.54839	25.5461	0.32202	-1.63478	0.134151	0.714933
ENSMUSG00000019737	Syne4	spectrin repeat containing, nuclear envelope family member 4	158.748	354.712	0.449093	-1.15491	0.134364	0.715274
ENSMUSG00000017756	Slc12a7	solute carrier family 12, member 7	2403.05	3809.35	0.630926	-0.664456	0.134407	0.715321
ENSMUSG00000062822	4833420G17Rik	RIKEN cDNA 4833420G17 gene	236.034	386.452	0.611775	-0.708926	0.134551	0.715566
ENSMUSG00000027088	Phospho2	phosphatase, orphan 2	154.629	249.363	0.621614	-0.685909	0.134702	0.715967
ENSMUSG00000026770	Il2ra	interleukin 2 receptor, alpha chain	52.768	256.625	0.208707	-2.26045	0.134797	0.716098
ENSMUSG00000071253	Slc25a16	solute carrier family 25 (mitochondrial carrier, Graves disease autoantigen), member 16	674.098	1087.76	0.620061	-0.689518	0.135299	0.716402
ENSMUSG00000018654	Ikzf1	IKAROS family zinc finger 1	305.9	896.33	0.342014	-1.54787	0.1351	0.716402
ENSMUSG00000020803	Txndc17	thioredoxin domain containing 17	501.109	798.127	0.628321	-0.670426	0.135601	0.716402
ENSMUSG00000046352	Gjb2	gap junction protein, beta 2	519.848	1054.81	0.493315	-1.01942	0.135654	0.716402
ENSMUSG00000021996	Esd	esterase D/formylglutathione hydrolase	1430.37	2415.73	0.592273	-0.755665	0.135068	0.716402
ENSMUSG00000032796	Lama1	laminin, alpha 1	242.141	639.276	0.379743	-1.3969	0.135376	0.716402
ENSMUSG00000036918	Ttc7	tetratricopeptide repeat domain 7	755.875	1204.85	0.62767	-0.671922	0.135486	0.716402
ENSMUSG00000024359	Hspa9	heat shock protein 9	7126.78	11202.3	0.636224	-0.652393	0.135485	0.716402
ENSMUSG00000026827	Gpd2	glycerol phosphate dehydrogenase 2, mitochondrial	711.453	1138.33	0.625329	-0.677313	0.135619	0.716402
ENSMUSG00000029162	Khk	ketohexokinase	1672.37	3403.48	0.491519	-1.02468	0.135072	0.716402
ENSMUSG00000045466	Zfp956	zinc finger protein 956	57.9095	102.246	0.570572	-0.809519	0.135114	0.716402
ENSMUSG00000025245	Lztfl1	leucine zipper transcription factor-like 1	198.922	322.882	0.617268	-0.696031	0.135485	0.716402
ENSMUSG00000014850	Msh3	mutS homolog 3	267.746	428.479	0.625749	-0.676344	0.135922	0.716635
ENSMUSG00000057766	Ankrd29	ankyrin repeat domain 29	135.079	218.031	0.621279	-0.686686	0.136075	0.716635
ENSMUSG00000078502	Gm13212	predicted gene 13212	46.3843	87.5656	0.535019	-0.902337	0.135966	0.716635
ENSMUSG00000025701	Alox5	arachidonate 5-lipoxygenase	33.7265	76.4595	0.448318	-1.15741	0.136081	0.716635
ENSMUSG00000022564	Grina	glutamate receptor, ionotropic, N-methyl D-aspartate-associated protein 1 (glutamate binding)	1831.06	3021.93	0.606054	-0.722482	0.13644	0.717427
ENSMUSG00000016552	Foxred2	FAD-dependent oxidoreductase domain containing 2	141.135	261.841	0.540764	-0.886928	0.137101	0.719433
ENSMUSG00000027347	Rasgrp1	RAS guanyl releasing protein 1	241.529	651.802	0.37152	-1.42849	0.13718	0.719433
ENSMUSG00000039263	Npepl1	aminopeptidase-like 1	500.961	796.273	0.629597	-0.6675	0.137221	0.719433
ENSMUSG00000043932	Klri2	killer cell lectin-like receptor family I member 2	8.76463	53.2828	0.179885	-2.47486	0.137292	0.719518
ENSMUSG00000037202	Prf1	perforin 1 (pore forming protein)	15.6437	95.1183	0.173159	-2.52983	0.137726	0.720322
ENSMUSG00000022679	Mpv17l	Mpv17 transgene, kidney disease mutant-like	720.611	1337.78	0.539006	-0.891627	0.137673	0.720322
ENSMUSG00000026655	Fam107b	family with sequence similarity 107, member B	1776.59	2759.58	0.64392	-0.635046	0.137605	0.720322
ENSMUSG00000062054	Iah1	isoamyl acetate-hydrolyzing esterase 1 homolog	377.581	723.511	0.522533	-0.936406	0.137828	0.720492
ENSMUSG00000026383	Epb41l5	erythrocyte membrane protein band 4.1 like 5	886.012	1459.73	0.607239	-0.719664	0.138151	0.72064
ENSMUSG00000016194	Hsd11b1	hydroxysteroid 11-beta dehydrogenase 1	96.0956	174.195	0.554215	-0.851483	0.138241	0.72064
ENSMUSG00000085531	Slc36a3os	solute carrier family 36 (proton/amino acid symporter), member 3, opposite strand	0	5.59284	0.15168	-2.7209	0.138219	0.72064
ENSMUSG00000055240	Zfp101	zinc finger protein 101	122.1	215.883	0.567586	-0.81709	0.138188	0.72064
ENSMUSG00000029104	Htt	huntingtin	1744.33	2765.81	0.630808	-0.664726	0.138128	0.72064
ENSMUSG00000004264	Phb2	prohibitin 2	704.362	1148.15	0.613812	-0.70413	0.138059	0.72064
ENSMUSG00000085665	Gm12059	predicted gene 12059	3.3527	15.1131	0.270134	-1.88825	0.13837	0.720945
ENSMUSG00000002332	Dhrs1	dehydrogenase/reductase (SDR family) member 1	459.313	812.685	0.565714	-0.821855	0.138342	0.720945
ENSMUSG00000052087	Rgs14	regulator of G-protein signaling 14	34.7818	107.535	0.329679	-1.60087	0.138687	0.721683
ENSMUSG00000027163	Commd9	COMM domain containing 9	182.796	307.511	0.595752	-0.747217	0.138665	0.721683
ENSMUSG00000039018	Mtg1	mitochondrial ribosome-associated GTPase 1	97.0094	167.419	0.581938	-0.781064	0.138782	0.721998
ENSMUSG00000026358	Rgs1	regulator of G-protein signaling 1	770.76	1432.37	0.538425	-0.893183	0.138972	0.722015
ENSMUSG00000025155	Dus1l	dihydrouridine synthase 1-like (S. cerevisiae)	362.632	593.897	0.611252	-0.710162	0.138987	0.722015
ENSMUSG00000071552	Tigit	T cell immunoreceptor with Ig and ITIM domains	33.366	130.845	0.260655	-1.93979	0.139088	0.722308
ENSMUSG00000041132	N4bp2l1	NEDD4 binding protein 2-like 1	111.032	199.036	0.560056	-0.836358	0.139294	0.722831
ENSMUSG00000009772	Nuak2	NUAK family, SNF1-like kinase, 2	1099.78	1819.97	0.604503	-0.726178	0.13961	0.723578
ENSMUSG00000049109	Themis	thymocyte selection associated	15.3928	216.712	0.0752959	-3.73128	0.14	0.723578
ENSMUSG00000020681	Ace	angiotensin I converting enzyme (peptidyl-dipeptidase A) 1	1084.11	1777.46	0.610142	-0.712784	0.139881	0.723578
ENSMUSG00000053390	Zfp952	zinc finger protein 952	105.298	174.342	0.606231	-0.72206	0.139984	0.723578
ENSMUSG00000050174	Nudt6	nudix (nucleoside diphosphate linked moiety X)-type motif 6	43.0123	79.8251	0.544537	-0.876898	0.139917	0.723578
ENSMUSG00000005813	Metap1	methionyl aminopeptidase 1	315.72	506.785	0.623728	-0.681011	0.139889	0.723578
ENSMUSG00000056228	Cars2	cysteinyl-tRNA synthetase 2 (mitochondrial)(putative)	141.257	241.486	0.586662	-0.7694	0.139948	0.723578
ENSMUSG00000026581	Sell	selectin, lymphocyte	10.0967	56.0183	0.194616	-2.3613	0.140066	0.723739
ENSMUSG00000029462	Vps29	VPS29 retromer complex component	637.243	984.59	0.647575	-0.626881	0.140188	0.72402
ENSMUSG00000001249	Hpn	hepsin	1060.13	1900.86	0.557942	-0.841814	0.140191	0.72402
ENSMUSG00000053580	Tanc2	tetratricopeptide repeat, ankyrin repeat and coiled-coil containing 2	2508.84	3816.76	0.657412	-0.605129	0.140292	0.724361
ENSMUSG00000041301	Cftr	cystic fibrosis transmembrane conductance regulator	91.8097	192.436	0.479794	-1.05951	0.1404	0.724634
ENSMUSG00000074868	Gm6478	predicted pseudogene 6478	33.4304	65.0268	0.521462	-0.939367	0.141089	0.725825
ENSMUSG00000022613	Miox	myo-inositol oxygenase	7658.46	17502.9	0.437587	-1.19236	0.141193	0.725825
ENSMUSG00000049871	Nlrc3	NLR family, CARD domain containing 3	44.428	195.058	0.231707	-2.10962	0.14117	0.725825
ENSMUSG00000043110	Lrrn4	leucine rich repeat neuronal 4	2.5097	11.8159	0.273855	-1.86852	0.141145	0.725825
ENSMUSG00000043484	Gm5867	predicted gene 5867	154.906	251.306	0.617926	-0.694495	0.141223	0.725825
ENSMUSG00000026107	Nabp1	nucleic acid binding protein 1	1792.29	2939.23	0.609916	-0.713317	0.141369	0.726097
ENSMUSG00000026701	Prdx6	peroxiredoxin 6	1010.65	1566.12	0.645549	-0.631401	0.141412	0.726137
ENSMUSG00000038217	Tlcd2	TLC domain containing 2	75.9858	137.451	0.556051	-0.846711	0.141464	0.726225
ENSMUSG00000039637	Coro7	coronin 7	625.635	933.47	0.670578	-0.576524	0.141688	0.726833
ENSMUSG00000073427	Gm4924	predicted gene 4924	7.47118	25.0549	0.325128	-1.62092	0.142165	0.728499
ENSMUSG00000032311	Nrg4	neuregulin 4	13.5459	30.642	0.459702	-1.12123	0.14219	0.728499
ENSMUSG00000028127	Abcd3	ATP-binding cassette, sub-family D (ALD), member 3	2818.41	4383.81	0.642994	-0.637122	0.142426	0.728982
ENSMUSG00000027692	Tnik	TRAF2 and NCK interacting kinase	86.1018	396.629	0.219053	-2.19065	0.142529	0.729149
ENSMUSG00000057614	Gnai1	guanine nucleotide binding protein (G protein), alpha inhibiting 1	557.777	890.591	0.626718	-0.674111	0.142699	0.729472
ENSMUSG00000087691	Gm15674	predicted gene 15674	1.23555	9.93056	0.204523	-2.28967	0.142944	0.73018
ENSMUSG00000051212	Gpr183	G protein-coupled receptor 183	173.529	510.274	0.341362	-1.55063	0.142912	0.73018
ENSMUSG00000086682	Gm16023	predicted gene 16023	31.9182	63.3361	0.511659	-0.966745	0.142877	0.73018
ENSMUSG00000005364	Il5ra	interleukin 5 receptor, alpha	47.4333	146.554	0.32824	-1.60718	0.143306	0.731302
ENSMUSG00000021298	Gpr132	G protein-coupled receptor 132	135.672	450.158	0.302935	-1.72292	0.14349	0.731536
ENSMUSG00000025026	Add3	adducin 3 (gamma)	2300.28	3490.84	0.659046	-0.601548	0.143531	0.731545
ENSMUSG00000032386	Trip4	thyroid hormone receptor interactor 4	421.41	658.472	0.640527	-0.642668	0.143943	0.732619
ENSMUSG00000081604	Gm11518	predicted gene 11518	4.70406	15.513	0.345428	-1.53354	0.144091	0.732702
ENSMUSG00000046598	Bdh1	3-hydroxybutyrate dehydrogenase, type 1	614.283	1090.01	0.563959	-0.826339	0.144114	0.732702
ENSMUSG00000056999	Ide	insulin degrading enzyme	1209.61	1872.51	0.646175	-0.630003	0.144087	0.732702
ENSMUSG00000030983	Bccip	BRCA2 and CDKN1A interacting protein	383.983	593.128	0.64798	-0.625979	0.14433	0.733258
ENSMUSG00000025940	Tmem70	transmembrane protein 70	386.294	616.947	0.626743	-0.674055	0.145163	0.7347
ENSMUSG00000025144	Cenpx	centromere protein X	195.827	326.779	0.600488	-0.735794	0.145294	0.7347
ENSMUSG00000001281	Itgb7	integrin beta 7	110.04	384.455	0.288076	-1.79548	0.145412	0.7347
ENSMUSG00000027339	Rassf2	Ras association (RalGDS/AF-6) domain family member 2	465.954	915.182	0.509674	-0.972353	0.145131	0.7347
ENSMUSG00000080002	Gm5566	predicted pseudogene 5566	84.8597	145.775	0.584975	-0.773553	0.145141	0.7347
ENSMUSG00000036931	Nfkbid	nuclear factor of kappa light polypeptide gene enhancer in B cells inhibitor, delta	317.38	1023.97	0.310623	-1.68676	0.145398	0.7347
ENSMUSG00000030972	Acsm5	acyl-CoA synthetase medium-chain family member 5	504.494	1276.05	0.39583	-1.33705	0.145254	0.7347
ENSMUSG00000031781	Ciapin1	cytokine induced apoptosis inhibitor 1	200.75	328.388	0.612499	-0.707219	0.144991	0.7347
ENSMUSG00000053641	Dennd4a	DENN/MADD domain containing 4A	841.5	2026.85	0.415466	-1.2672	0.14517	0.7347
ENSMUSG00000018166	Erbb3	erb-b2 receptor tyrosine kinase 3	1037.58	1596.25	0.65023	-0.620977	0.145751	0.735576
ENSMUSG00000086213	A330040F15Rik	RIKEN cDNA A330040F15 gene	35.9401	111.627	0.327987	-1.60829	0.145811	0.73561
ENSMUSG00000053907	Mat2a	methionine adenosyltransferase II, alpha	2056.77	3099.47	0.663697	-0.591404	0.145912	0.735851
ENSMUSG00000084319	Tpt1-ps3	tumor protein, translationally-controlled, pseudogene 3	11461	17374.1	0.659681	-0.60016	0.1462	0.735853
ENSMUSG00000058979	Hdhd5	haloacid dehalogenase like hydrolase domain containing 5	151.367	253.125	0.599573	-0.737992	0.146028	0.735853
ENSMUSG00000089839	Rps19-ps11	ribosomal protein S19, pseudogene 11	0	5.67346	0.149847	-2.73844	0.146323	0.735953
ENSMUSG00000021236	Entpd5	ectonucleoside triphosphate diphosphohydrolase 5	1428.18	2261.67	0.631635	-0.662836	0.146397	0.735953
ENSMUSG00000021327	Zkscan3	zinc finger with KRAB and SCAN domains 3	596.554	966.548	0.617596	-0.695264	0.146344	0.735953
ENSMUSG00000030357	Fkbp4	FK506 binding protein 4	2262.05	3501.21	0.646177	-0.629998	0.146491	0.736067
ENSMUSG00000090117	Gm16541	predicted gene 16541	1.29345	9.64304	0.215489	-2.21432	0.146611	0.736488
ENSMUSG00000087538	Gm16341	predicted gene 16341	0	5.32037	0.158219	-2.66001	0.146898	0.737136
ENSMUSG00000073000	Gm10451	predicted gene 10451	31.294	60.569	0.524517	-0.930938	0.147313	0.737136
ENSMUSG00000030228	Pik3c2g	phosphatidylinositol-4-phosphate 3-kinase catalytic subunit type 2 gamma	188.613	419.38	0.451052	-1.14863	0.14727	0.737136
ENSMUSG00000030924	Rexo5	RNA exonuclease 5	70.3229	127.315	0.555841	-0.847255	0.147177	0.737136
ENSMUSG00000084981	Gm15962	predicted gene 15962	22.4908	79.6236	0.291363	-1.77911	0.147548	0.737608
ENSMUSG00000027710	Acad9	acyl-Coenzyme A dehydrogenase family, member 9	474.635	740.437	0.641504	-0.640469	0.14755	0.737608
ENSMUSG00000035042	Ccl5	chemokine (C-C motif) ligand 5	66.1979	306.05	0.21885	-2.19199	0.148311	0.738553
ENSMUSG00000025429	Pstpip2	proline-serine-threonine phosphatase-interacting protein 2	53.7976	93.7478	0.578352	-0.789981	0.148421	0.738553
ENSMUSG00000027070	Lrp2	low density lipoprotein receptor-related protein 2	42303.1	85768.4	0.493231	-1.01966	0.148378	0.738553
ENSMUSG00000042757	Tmem108	transmembrane protein 108	29.2734	56.8454	0.523349	-0.934155	0.148182	0.738553
ENSMUSG00000045382	Cxcr4	chemokine (C-X-C motif) receptor 4	340.636	572.169	0.596048	-0.746499	0.148511	0.738818
ENSMUSG00000024772	Ehd1	EH-domain containing 1	1278.52	1970.68	0.64895	-0.623821	0.148572	0.738818
ENSMUSG00000027774	Gfm1	G elongation factor, mitochondrial 1	1269.33	2009.32	0.631905	-0.662221	0.148653	0.738818
ENSMUSG00000085684	4930469K13Rik	RIKEN cDNA 4930469K13 gene	11.1971	34.791	0.340787	-1.55306	0.149264	0.739842
ENSMUSG00000085962	Gm16984	predicted gene, 16984	5.76588	19.6698	0.327332	-1.61117	0.14913	0.739842
ENSMUSG00000045215	Asxl3	additional sex combs like 3 (Drosophila)	63.1734	171.972	0.371005	-1.43049	0.149363	0.739842
ENSMUSG00000069733	Ube2u	ubiquitin-conjugating enzyme E2U (putative)	39.1577	91.9655	0.431964	-1.21102	0.14898	0.739842
ENSMUSG00000030336	Cd27	CD27 antigen	61.0306	239.17	0.258278	-1.953	0.149265	0.739842
ENSMUSG00000092260	Zfp963	zinc finger protein 963	9.3116	25.9966	0.38196	-1.38851	0.149265	0.739842
ENSMUSG00000026617	Bpnt1	bisphosphate 3'-nucleotidase 1	1811.15	2805.23	0.64576	-0.630931	0.150026	0.741345
ENSMUSG00000024580	Grpel2	GrpE-like 2, mitochondrial	339.073	526.806	0.644313	-0.634166	0.150016	0.741345
ENSMUSG00000051111	Sv2c	synaptic vesicle glycoprotein 2c	2.15576	12.3297	0.236745	-2.07859	0.150243	0.741885
ENSMUSG00000025962	Fastkd2	FAST kinase domains 2	151.058	250.893	0.60366	-0.728193	0.150344	0.742028
ENSMUSG00000045730	Adrb2	adrenergic receptor, beta 2	204.772	338.086	0.606842	-0.720607	0.150732	0.743228
ENSMUSG00000020635	Fkbp1b	FK506 binding protein 1b	13.8226	39.8977	0.362432	-1.46422	0.150848	0.74362
ENSMUSG00000025102	3110040N11Rik	RIKEN cDNA 3110040N11 gene	80.2845	143.789	0.561399	-0.832903	0.15096	0.743998
ENSMUSG00000084452	Gm24597	predicted gene, 24597	9.09927	23.8051	0.407145	-1.29639	0.151085	0.744077
ENSMUSG00000058921	Slc10a5	solute carrier family 10 (sodium/bile acid cotransporter family), member 5	262.019	813.113	0.323074	-1.63006	0.151047	0.744077
ENSMUSG00000028443	Nudt2	nudix (nucleoside diphosphate linked moiety X)-type motif 2	91.1019	156.044	0.586472	-0.769865	0.151068	0.744077
ENSMUSG00000001663	Gstt1	glutathione S-transferase, theta 1	396.435	643.639	0.616524	-0.697772	0.151194	0.744196
ENSMUSG00000033416	Gucd1	guanylyl cyclase domain containing 1	989.342	1634.93	0.60537	-0.72411	0.151275	0.744304
ENSMUSG00000006378	Gcat	glycine C-acetyltransferase (2-amino-3-ketobutyrate-coenzyme A ligase)	297.792	483.261	0.617006	-0.696644	0.151421	0.744665
ENSMUSG00000087881	Gm22442	predicted gene, 22442	556.206	1159.27	0.480238	-1.05818	0.151874	0.74584
ENSMUSG00000021591	Glrx	glutaredoxin	123.87	198.031	0.627388	-0.67257	0.152111	0.74584
ENSMUSG00000048707	Tprn	taperin	226.432	389.134	0.58296	-0.778532	0.152114	0.74584
ENSMUSG00000019232	Etnppl	ethanolamine phosphate phospholyase	26.9439	73.7613	0.373775	-1.41976	0.152167	0.74584
ENSMUSG00000030792	Dkkl1	dickkopf-like 1	0.862302	11.2173	0.152432	-2.71376	0.151785	0.74584
ENSMUSG00000036138	Acaa1a	acetyl-Coenzyme A acyltransferase 1A	451.822	728.467	0.620758	-0.687898	0.152056	0.74584
ENSMUSG00000020526	Znhit3	zinc finger, HIT type 3	45.9531	86.0578	0.539333	-0.890752	0.152405	0.74665
ENSMUSG00000051343	Rab11fip5	RAB11 family interacting protein 5 (class I)	1221.29	1926.33	0.634192	-0.657009	0.152647	0.747029
ENSMUSG00000020328	Nudcd2	NudC domain containing 2	165.968	272.907	0.609579	-0.714114	0.152746	0.747079
ENSMUSG00000071716	Apol7e	apolipoprotein L 7e	16.4867	74.2761	0.232302	-2.10593	0.152939	0.74743
ENSMUSG00000056735	A930024E05Rik	RIKEN cDNA A930024E05 gene	16.9951	56.356	0.313744	-1.67234	0.153183	0.748326
ENSMUSG00000062014	Gmfb	glia maturation factor, beta	780.277	1156.61	0.674903	-0.567247	0.15356	0.749279
ENSMUSG00000088054	Mir1968	microRNA 1968	0.431151	7.10554	0.176565	-2.50173	0.153498	0.749279
ENSMUSG00000004612	Nkg7	natural killer cell group 7 sequence	26.3904	146.82	0.185296	-2.4321	0.15364	0.749492
ENSMUSG00000062939	Stat4	signal transducer and activator of transcription 4	67.3241	307.033	0.221808	-2.17262	0.153846	0.750143
ENSMUSG00000023169	Slc38a1	solute carrier family 38, member 1	151.56	394.679	0.385565	-1.37495	0.154191	0.750578
ENSMUSG00000084790	Gm15879	predicted gene 15879	35.8564	70.5723	0.514954	-0.957486	0.154429	0.751557
ENSMUSG00000016503	Gtf3a	general transcription factor III A	116.167	190.782	0.610938	-0.710901	0.154678	0.751968
ENSMUSG00000030468	Siglecg	sialic acid binding Ig-like lectin G	8.33348	38.3692	0.237076	-2.07658	0.15459	0.751968
ENSMUSG00000023755	Rhebl1	Ras homolog enriched in brain like 1	36.3262	69.2674	0.531202	-0.912666	0.154789	0.752159
ENSMUSG00000089943	Ugt1a5	UDP glucuronosyltransferase 1 family, polypeptide A5	11.5704	28.2656	0.429527	-1.21918	0.15513	0.752296
ENSMUSG00000041720	Pi4ka	phosphatidylinositol 4-kinase alpha	2230.28	3477.82	0.64139	-0.640726	0.155268	0.752296
ENSMUSG00000027832	Ptx3	pentraxin related gene	2.97945	14.3875	0.258615	-1.95112	0.154986	0.752296
ENSMUSG00000006711	D130043K22Rik	RIKEN cDNA D130043K22 gene	12.2331	28.7839	0.444305	-1.17038	0.155713	0.753889
ENSMUSG00000014453	Blk	B lymphoid kinase	8.11466	55.0614	0.162584	-2.62075	0.156117	0.754191
ENSMUSG00000008226	Scrn3	secernin 3	258.421	412.543	0.627314	-0.67274	0.156095	0.754191
ENSMUSG00000029032	Arhgef16	Rho guanine nucleotide exchange factor (GEF) 16	788.186	1273.38	0.619269	-0.691363	0.156081	0.754191
ENSMUSG00000051844	B230319C09Rik	RIKEN cDNA B230319C09 gene	54.7499	92.8075	0.594301	-0.750734	0.155848	0.754191
ENSMUSG00000031549	Ido2	indoleamine 2,3-dioxygenase 2	30.4703	56.3012	0.549209	-0.864574	0.156115	0.754191
ENSMUSG00000035849	Krt222	keratin 222	9.19578	23.9008	0.409457	-1.28822	0.156483	0.754952
ENSMUSG00000076467	Trbv13-1	T cell receptor beta, variable 13-1	0	5.34713	0.157551	-2.66611	0.156815	0.756203
ENSMUSG00000020877	Scrn2	secernin 2	387.832	720.496	0.538925	-0.891844	0.157117	0.75674
ENSMUSG00000000167	Pih1d2	PIH1 domain containing 2	22.8382	47.1173	0.495419	-1.01328	0.157028	0.75674
ENSMUSG00000024935	Slc1a1	solute carrier family 1 (neuronal/epithelial high affinity glutamate transporter, system Xag), member 1	1211.72	2142.34	0.565808	-0.821615	0.15757	0.758244
ENSMUSG00000022574	Naprt	nicotinate phosphoribosyltransferase	150.253	252.07	0.597674	-0.742569	0.157627	0.75825
ENSMUSG00000065979	Cpped1	calcineurin-like phosphoesterase domain containing 1	668.248	1012.15	0.660564	-0.598229	0.157702	0.75825
ENSMUSG00000028948	Nol9	nucleolar protein 9	301.324	461.187	0.654117	-0.61238	0.157719	0.75825
ENSMUSG00000029673	Auts2	autism susceptibility candidate 2	587.687	1128.74	0.52108	-0.940423	0.157775	0.758291
ENSMUSG00000073676	Hspe1	heat shock protein 1 (chaperonin 10)	779.176	1195.51	0.652043	-0.616961	0.158571	0.758983
ENSMUSG00000020741	Cluh	clustered mitochondria (cluA/CLU1) homolog	2989.95	4670.66	0.640233	-0.643332	0.158226	0.758983
ENSMUSG00000064841	Gm26205	predicted gene, 26205	81.4428	145.87	0.561331	-0.833077	0.158221	0.758983
ENSMUSG00000024437	Gm8615	predicted pseudogene 8615	172.879	344.908	0.502675	-0.992302	0.158301	0.758983
ENSMUSG00000027282	Mtch2	mitochondrial carrier 2	530.62	816.895	0.649986	-0.621521	0.158652	0.759107
ENSMUSG00000042988	Notum	notum pectinacetylesterase homolog (Drosophila)	30.5282	57.9746	0.534606	-0.903452	0.158949	0.759907
ENSMUSG00000042118	Bhmt2	betaine-homocysteine methyltransferase 2	306.26	624.746	0.491031	-1.02612	0.158941	0.759907
ENSMUSG00000091613	Gm17046	predicted gene 17046	68.386	119.868	0.574066	-0.800711	0.15899	0.759928
ENSMUSG00000041538	H2-Ob	histocompatibility 2, O region beta locus	47.3817	127.818	0.375581	-1.4128	0.159319	0.760793
ENSMUSG00000082851	Gm11931	predicted gene 11931	0.411848	6.47998	0.18875	-2.40545	0.159308	0.760793
ENSMUSG00000020679	Hnf1b	HNF1 homeobox B	1438.15	2179.5	0.660007	-0.599447	0.159449	0.761063
ENSMUSG00000028013	Ppa2	pyrophosphatase (inorganic) 2	1696.75	2656.98	0.638737	-0.646706	0.159444	0.761063
ENSMUSG00000021097	Clmn	calmin	2435.61	3860.39	0.631018	-0.664247	0.159695	0.761707
ENSMUSG00000029014	Dnajc2	DnaJ heat shock protein family (Hsp40) member C2	710.173	1091.68	0.650849	-0.619604	0.159795	0.761828
ENSMUSG00000025574	Tk1	thymidine kinase 1	167.538	275.721	0.609054	-0.715359	0.159886	0.761959
ENSMUSG00000083186	Gm11805	predicted gene 11805	29.0352	55.2755	0.533717	-0.905853	0.159896	0.761959
ENSMUSG00000026669	Mcm10	minichromosome maintenance 10 replication initiation factor	43.4306	109.996	0.400291	-1.32088	0.160079	0.762655
ENSMUSG00000044021	Muc19	mucin 19	1.23555	11.4282	0.179877	-2.47492	0.16021	0.762836
ENSMUSG00000034108	Ccs	copper chaperone for superoxide dismutase	280.127	491.572	0.570733	-0.809111	0.16058	0.763449
ENSMUSG00000086241	4930483K19Rik	RIKEN cDNA 4930483K19 gene	1.64739	10.4758	0.230693	-2.11595	0.16134	0.76371
ENSMUSG00000083022	Rps15a-ps6	ribosomal protein S15A, pseudogene 6	220.1	338.543	0.651169	-0.618896	0.16111	0.76371
ENSMUSG00000040592	Cd79b	CD79B antigen	14.981	49.8441	0.314313	-1.66972	0.160932	0.76371
ENSMUSG00000021832	Psmc6	proteasome (prosome, macropain) 26S subunit, ATPase, 6	757.85	1173.16	0.646292	-0.629742	0.160765	0.76371
ENSMUSG00000054619	Mettl7a1	methyltransferase like 7A1	1640.95	2587.3	0.634375	-0.656592	0.160804	0.76371
ENSMUSG00000041565	L3mbtl4	l(3)mbt-like 4 (Drosophila)	0	4.67976	0.176064	-2.50583	0.160807	0.76371
ENSMUSG00000045817	Zfp36l2	zinc finger protein 36, C3H type-like 2	2289.94	4028.73	0.56851	-0.814742	0.160768	0.76371
ENSMUSG00000043621	Ubxn10	UBX domain protein 10	34.8204	68.9624	0.511995	-0.965798	0.161193	0.76371
ENSMUSG00000054226	Tprkb	Tp53rk binding protein	429.821	968.263	0.444483	-1.1698	0.161265	0.76371
ENSMUSG00000067714	Lpar5	lysophosphatidic acid receptor 5	15.0582	36.9067	0.423624	-1.23915	0.161356	0.76371
ENSMUSG00000065817	Gm24698	predicted gene, 24698	0.823697	7.99252	0.202802	-2.30186	0.161488	0.76371
ENSMUSG00000076469	Trbv13-2	T cell receptor beta, variable 13-2	2.529	19.9775	0.168228	-2.57151	0.161569	0.763921
ENSMUSG00000030364	Clec2h	C-type lectin domain family 2, member h	280.899	464.211	0.60596	-0.722706	0.161683	0.764108
ENSMUSG00000001773	Folh1	folate hydrolase 1	1016.41	1691.87	0.600998	-0.734567	0.162347	0.765839
ENSMUSG00000029221	Slc30a9	solute carrier family 30 (zinc transporter), member 9	1316.71	2031.23	0.648408	-0.625027	0.162393	0.765881
ENSMUSG00000022982	Sod1	superoxide dismutase 1, soluble	1558.21	2446.79	0.636988	-0.650662	0.162577	0.766115
ENSMUSG00000028965	Tnfrsf9	tumor necrosis factor receptor superfamily, member 9	4.62685	19.5507	0.273804	-1.86879	0.162592	0.766115
ENSMUSG00000021102	Glrx5	glutaredoxin 5	227.81	367.052	0.621678	-0.68576	0.162929	0.766333
ENSMUSG00000045302	Preb	prolactin regulatory element binding	918.722	1387.3	0.662481	-0.594048	0.162798	0.766333
ENSMUSG00000054618	Gm9951	predicted gene 9951	18.7841	79.1081	0.246968	-2.01761	0.162859	0.766333
ENSMUSG00000039632	Ccdc151	coiled-coil domain containing 151	38.0573	89.5048	0.431549	-1.2124	0.162864	0.766333
ENSMUSG00000084128	Esrp2	epithelial splicing regulatory protein 2	359.279	563.704	0.637996	-0.648382	0.163043	0.766487
ENSMUSG00000076913	Traj16	T cell receptor alpha joining 16	0.823697	8.24206	0.197326	-2.34135	0.163389	0.767066
ENSMUSG00000047921	Trappc9	trafficking protein particle complex 9	790.457	1219.13	0.648669	-0.624445	0.16344	0.76713
ENSMUSG00000026187	Xrcc5	X-ray repair complementing defective repair in Chinese hamster cells 5	432.697	673.683	0.642817	-0.637521	0.16362	0.767303
ENSMUSG00000025209	Twnk	twinkle mtDNA helicase	289.207	453.092	0.639093	-0.645902	0.16362	0.767303
ENSMUSG00000019122	Ccl9	chemokine (C-C motif) ligand 9	141.875	314.501	0.452852	-1.14289	0.163884	0.767765
ENSMUSG00000060317	Acnat2	acyl-coenzyme A amino acid N-acyltransferase 2	842.358	1482.83	0.568366	-0.815109	0.164183	0.768516
ENSMUSG00000085719	4933424L21Rik	RIKEN cDNA 4933424L21 gene	2.94085	14.8873	0.24805	-2.01129	0.164282	0.76877
ENSMUSG00000022464	Slc38a4	solute carrier family 38, member 4	23.0956	49.5394	0.476769	-1.06864	0.164312	0.76877
ENSMUSG00000024922	Ovol1	ovo like zinc finger 1	70.6897	118.919	0.597815	-0.742229	0.164446	0.769221
ENSMUSG00000045826	Ptprcap	protein tyrosine phosphatase, receptor type, C polypeptide-associated protein	32.1563	182.646	0.180545	-2.46957	0.164647	0.76956
ENSMUSG00000053862	Slc51b	solute carrier family 51, beta subunit	102.415	171.287	0.600248	-0.736369	0.164701	0.76956
ENSMUSG00000018068	Ints2	integrator complex subunit 2	372.715	560.405	0.665679	-0.587101	0.164838	0.769655
ENSMUSG00000004032	Gstm5	glutathione S-transferase, mu 5	563.176	1014.9	0.555346	-0.84854	0.165013	0.769773
ENSMUSG00000026788	Zbtb43	zinc finger and BTB domain containing 43	413.842	661.446	0.626228	-0.67524	0.165152	0.770074
ENSMUSG00000006599	Gtf2h1	general transcription factor II H, polypeptide 1	549.443	849.384	0.647287	-0.627522	0.165228	0.770103
ENSMUSG00000074026	Gm6091	predicted pseudogene 6091	0.862302	8.3068	0.200101	-2.3212	0.165255	0.770103
ENSMUSG00000028064	Sema4a	sema domain, immunoglobulin domain (Ig), transmembrane domain (TM) and short cytoplasmic domain, (semaphorin) 4A	961.831	1433.74	0.671082	-0.575438	0.165435	0.770465
ENSMUSG00000022237	Ankrd33b	ankyrin repeat domain 33B	1091.73	1638.74	0.666402	-0.585535	0.165731	0.771374
ENSMUSG00000040600	Eps8l3	EPS8-like 3	1.64739	9.53582	0.251276	-1.99266	0.165716	0.771374
ENSMUSG00000026721	Rabgap1l	RAB GTPase activating protein 1-like	1347.15	2042.16	0.659833	-0.599828	0.16603	0.772043
ENSMUSG00000093245	Mir677	microRNA 677	5.88169	20.6483	0.317887	-1.65342	0.16596	0.772043
ENSMUSG00000024399	Ltb	lymphotoxin B	18.6232	151.188	0.128941	-2.95522	0.166062	0.772043
ENSMUSG00000002660	Clpp	caseinolytic mitochondrial matrix peptidase proteolytic subunit	349.246	541.092	0.646102	-0.630166	0.166138	0.772047
ENSMUSG00000039519	Cyp7b1	cytochrome P450, family 7, subfamily b, polypeptide 1	29.6015	81.8541	0.369342	-1.43697	0.16627	0.772236
ENSMUSG00000001120	Pcbp3	poly(rC) binding protein 3	202.732	320.387	0.633914	-0.657641	0.166547	0.772348
ENSMUSG00000025362	Rps26	ribosomal protein S26	243.196	375.164	0.649173	-0.623325	0.166362	0.772348
ENSMUSG00000032381	Fam96a	family with sequence similarity 96, member A	350.283	568.828	0.616471	-0.697895	0.166578	0.772348
ENSMUSG00000022913	Psmg1	proteasome (prosome, macropain) assembly chaperone 1	128.689	209.895	0.614947	-0.701466	0.166725	0.77251
ENSMUSG00000030148	Clec4a2	C-type lectin domain family 4, member a2	45.3354	89.4575	0.512235	-0.965123	0.166681	0.77251
ENSMUSG00000015437	Gzmb	granzyme B	10.6437	53.5979	0.213262	-2.2293	0.166864	0.772544
ENSMUSG00000020973	Dnaaf2	dynein, axonemal assembly factor 2	53.8748	98.1956	0.553197	-0.854134	0.166964	0.772589
ENSMUSG00000037916	Ndufv1	NADH dehydrogenase (ubiquinone) flavoprotein 1	1823.35	2877.36	0.633817	-0.657862	0.167042	0.772589
ENSMUSG00000085353	1700092C17Rik	RIKEN cDNA 1700092C17 gene	0	4.77543	0.173147	-2.52993	0.166995	0.772589
ENSMUSG00000040345	Arhgap9	Rho GTPase activating protein 9	80.5484	277.433	0.292884	-1.7716	0.167237	0.772616
ENSMUSG00000046230	Vps13a	vacuolar protein sorting 13A	1047.49	1596.33	0.656399	-0.607355	0.167273	0.772616
ENSMUSG00000023939	Mrpl14	mitochondrial ribosomal protein L14	128.451	213.057	0.604752	-0.725584	0.167652	0.774018
ENSMUSG00000035834	Polr3g	polymerase (RNA) III (DNA directed) polypeptide G	70.8957	120.22	0.593103	-0.753646	0.168431	0.774845
ENSMUSG00000055717	Slain1	SLAIN motif family, member 1	68.1221	156.543	0.438749	-1.18853	0.168225	0.774845
ENSMUSG00000018126	Baiap2l2	BAI1-associated protein 2-like 2	713.564	1167.99	0.611264	-0.710132	0.167981	0.774845
ENSMUSG00000079492	Gm11127	predicted gene 11127	0.823697	8.18403	0.198573	-2.33226	0.168174	0.774845
ENSMUSG00000057230	Aak1	AP2 associated kinase 1	985.627	1476.45	0.667793	-0.582528	0.168335	0.774845
ENSMUSG00000030909	Anks4b	ankyrin repeat and sterile alpha motif domain containing 4B	505.749	1113.11	0.454845	-1.13655	0.16797	0.774845
ENSMUSG00000032786	Alas1	aminolevulinic acid synthase 1	1770.31	2974.78	0.595243	-0.748448	0.168128	0.774845
ENSMUSG00000024503	Spink1	serine peptidase inhibitor, Kazal type 1	446.481	863.271	0.517756	-0.949656	0.168497	0.774964
ENSMUSG00000068426	Vmn1r19	vomeronasal 1 receptor 19	5.901	17.352	0.376034	-1.41106	0.168591	0.775226
ENSMUSG00000031698	Mylk3	myosin light chain kinase 3	12.8638	42.2276	0.320717	-1.64063	0.168633	0.775246
ENSMUSG00000044221	Grsf1	G-rich RNA sequence binding factor 1	1149.21	1771.96	0.648751	-0.624263	0.168717	0.775318
ENSMUSG00000006575	Rundc3a	RUN domain containing 3A	58.3279	107.49	0.546852	-0.870777	0.168854	0.775743
ENSMUSG00000081670	Gm15697	predicted gene 15697	4.1957	14.979	0.325159	-1.62078	0.16892	0.775872
ENSMUSG00000022555	Dgat1	diacylglycerol O-acyltransferase 1	278.093	460.696	0.604496	-0.726196	0.169428	0.775954
ENSMUSG00000026875	Traf1	TNF receptor-associated factor 1	186.734	402.823	0.464892	-1.10503	0.169205	0.775954
ENSMUSG00000029632	Ndufa4	NADH dehydrogenase (ubiquinone) 1 alpha subcomplex, 4	713.506	1127.11	0.633365	-0.65889	0.169163	0.775954
ENSMUSG00000030056	Isy1	ISY1 splicing factor homolog	329.658	506.639	0.651363	-0.618465	0.169273	0.775954
ENSMUSG00000006021	Kptn	kaptin	85.928	146.649	0.588749	-0.764275	0.169068	0.775954
ENSMUSG00000026285	Pdcd1	programmed cell death 1	22.5101	178.371	0.131069	-2.9316	0.1697	0.776684
ENSMUSG00000031826	Usp10	ubiquitin specific peptidase 10	628.035	970.13	0.647735	-0.626524	0.169668	0.776684
ENSMUSG00000009894	Snap47	synaptosomal-associated protein, 47	553.967	849.295	0.652675	-0.615563	0.170696	0.777317
ENSMUSG00000022790	Igsf11	immunoglobulin superfamily, member 11	1236.14	1842.26	0.67117	-0.57525	0.170348	0.777317
ENSMUSG00000022762	Ncam2	neural cell adhesion molecule 2	34.8976	64.4539	0.548441	-0.866592	0.170683	0.777317
ENSMUSG00000089129	Gm26407	predicted gene, 26407	0	4.97883	0.167257	-2.57986	0.170164	0.777317
ENSMUSG00000043789	Vwce	von Willebrand factor C and EGF domains	71.3912	149.428	0.481235	-1.05519	0.170768	0.777317
ENSMUSG00000024782	Ak3	adenylate kinase 3	1716.17	2607.03	0.658415	-0.602931	0.170664	0.777317
ENSMUSG00000036850	Mrpl41	mitochondrial ribosomal protein L41	233.723	379.944	0.616162	-0.698618	0.170942	0.777317
ENSMUSG00000074807	Gm10762	predicted gene 10762	11.7248	28.9985	0.42418	-1.23725	0.170618	0.777317
ENSMUSG00000027690	Slc2a2	solute carrier family 2 (facilitated glucose transporter), member 2	951.935	1553.43	0.613044	-0.705938	0.170173	0.777317
ENSMUSG00000025825	Iscu	iron-sulfur cluster assembly enzyme	608.466	930.952	0.653967	-0.612709	0.170739	0.777317
ENSMUSG00000005069	Pex5	peroxisomal biogenesis factor 5	507.628	782.811	0.648916	-0.623896	0.170118	0.777317
ENSMUSG00000030880	Polr3e	polymerase (RNA) III (DNA directed) polypeptide E	482.28	1019.45	0.473593	-1.07828	0.170971	0.777317
ENSMUSG00000023495	Pcbp4	poly(rC) binding protein 4	210.358	348.619	0.604537	-0.726097	0.170134	0.777317
ENSMUSG00000009633	G0s2	G0/G1 switch gene 2	221.033	344.277	0.643058	-0.636978	0.171452	0.778472
ENSMUSG00000086184	Gm12764	predicted gene 12764	2.90224	11.8698	0.30321	-1.72161	0.171428	0.778472
[truncated: 7,968 more rows]
