# Supplementary material for: Sex differences in transcriptomic profiles in aged kidney cells of renin lineage
Source: Aging (Albany NY). 2018 Apr 18;10(4):606–21. doi: 10.18632/aging.101416 (PMC5940125; doi:10.18632/aging.101416)
Supplement: Supplementary Table S6 [file aging-10-101416-s006.xlsx]

## Sheet: up_aged_female
Table S6 GSEA up-regulated pathways aged female vs. young female
NAME	SIZE	ES	NES	NOM p-val	FDR q-val
HALLMARK_EPITHELIAL_MESENCHYMAL_TRANSITION	188	0.795829	1.77798	0.0144753	0.325265
HALLMARK_INTERFERON_GAMMA_RESPONSE	183	0.743611	1.66107	0.0120337	0.164927
HALLMARK_APICAL_JUNCTION	177	0.73489	1.65769	0.00717703	0.110879
HALLMARK_KRAS_SIGNALING_UP	178	0.741401	1.63977	0.0125786	0.0845711
HALLMARK_COAGULATION	120	0.757012	1.63562	0.00897436	0.0680136
HALLMARK_INTERFERON_ALPHA_RESPONSE	87	0.742411	1.58119	0.00813008	0.0648667
HALLMARK_TGF_BETA_SIGNALING	53	0.752052	1.50565	0.0154494	0.076676
HALLMARK_APOPTOSIS	150	0.670607	1.49043	0.0136307	0.073969
HALLMARK_IL6_JAK_STAT3_SIGNALING	80	0.703362	1.48523	0.0212766	0.0691566
HALLMARK_ANGIOGENESIS	32	0.763258	1.43263	0.0361795	0.0911161
HALLMARK_INFLAMMATORY_RESPONSE	179	0.629567	1.42188	0.0194647	0.0916538
HALLMARK_COMPLEMENT	173	0.614906	1.38388	0.025393	0.112881
HALLMARK_UV_RESPONSE_DN	139	0.61809	1.36551	0.0423412	0.124993
HALLMARK_HYPOXIA	186	0.598797	1.3522	0.0245327	0.129771
HALLMARK_MYOGENESIS	172	0.603677	1.34884	0.0417163	0.123996
HALLMARK_P53_PATHWAY	186	0.596671	1.31659	0.054678	0.150937
HALLMARK_HEDGEHOG_SIGNALING	33	0.687181	1.30404	0.113069	0.156096
HALLMARK_IL2_STAT5_SIGNALING	187	0.547878	1.23577	0.0968123	0.248976
HALLMARK_TNFA_SIGNALING_VIA_NFKB	191	0.545603	1.22693	0.110977	0.252266
HALLMARK_ESTROGEN_RESPONSE_EARLY	186	0.538589	1.19957	0.13859	0.289308
HALLMARK_ALLOGRAFT_REJECTION	170	0.509388	1.13367	0.219902	0.420757
HALLMARK_NOTCH_SIGNALING	31	0.595147	1.1226	0.306094	0.428432
HALLMARK_WNT_BETA_CATENIN_SIGNALING	39	0.577759	1.10869	0.326979	0.444224
HALLMARK_ADIPOGENESIS	190	0.486695	1.08278	0.303571	0.488228
HALLMARK_ESTROGEN_RESPONSE_LATE	172	0.472627	1.0535	0.342891	0.540234
HALLMARK_XENOBIOTIC_METABOLISM	176	0.453529	1.02083	0.427208	0.600632
HALLMARK_UNFOLDED_PROTEIN_RESPONSE	111	0.456809	1.0066	0.437028	0.613938
HALLMARK_SPERMATOGENESIS	94	0.453318	0.973016	0.512755	0.674044
HALLMARK_ANDROGEN_RESPONSE	92	0.445188	0.937449	0.579821	0.736104
HALLMARK_DNA_REPAIR	136	0.410279	0.896366	0.654477	0.806818
HALLMARK_UV_RESPONSE_UP	142	0.396696	0.872424	0.686806	0.83371
HALLMARK_MITOTIC_SPINDLE	196	0.377158	0.852986	0.760529	0.84834
HALLMARK_HEME_METABOLISM	174	0.370382	0.81797	0.80268	0.893638
HALLMARK_GLYCOLYSIS	188	0.350673	0.797248	0.863081	0.905708
HALLMARK_KRAS_SIGNALING_DN	143	0.357459	0.79011	0.849315	0.892996
HALLMARK_PANCREAS_BETA_CELLS	25	0.412409	0.744796	0.823704	0.93602
HALLMARK_PROTEIN_SECRETION	94	0.215465	0.457783	1	0.999949
