# Supplementary material for: Sex differences in transcriptomic profiles in aged kidney cells of renin lineage
Source: Aging (Albany NY). 2018 Apr 18;10(4):606–21. doi: 10.18632/aging.101416 (PMC5940125; doi:10.18632/aging.101416)
Supplement: Supplementary Table S7 [file aging-10-101416-s007.xlsx]

## Sheet: down_aged_female
Table S7 GSEA down-regulated pathways aged female vs. young female
NAME	SIZE	ES	NES	NOM p-val	FDR q-val
HALLMARK_OXIDATIVE_PHOSPHORYLATION	192	-0.652652	-1.70498	0	0.105455
HALLMARK_MYC_TARGETS_V2	58	-0.610555	-1.40919	0.0509091	0.388037
HALLMARK_FATTY_ACID_METABOLISM	144	-0.529026	-1.35563	0.040201	0.330387
HALLMARK_PEROXISOME	95	-0.502475	-1.23211	0.122449	0.457576
HALLMARK_CHOLESTEROL_HOMEOSTASIS	67	-0.492704	-1.16011	0.195572	0.50172
HALLMARK_BILE_ACID_METABOLISM	104	-0.44867	-1.11258	0.219048	0.517432
HALLMARK_E2F_TARGETS	193	-0.401159	-1.02863	0.329114	0.643112
HALLMARK_APICAL_SURFACE	42	-0.459496	-1.02742	0.393502	0.56613
HALLMARK_MYC_TARGETS_V1	197	-0.37529	-0.965751	0.468354	0.666591
HALLMARK_MTORC1_SIGNALING	192	-0.369327	-0.950656	0.448087	0.642538
HALLMARK_PI3K_AKT_MTOR_SIGNALING	99	-0.363405	-0.884206	0.641148	0.778078
HALLMARK_REACTIVE_OXIGEN_SPECIES_PATHWAY	41	-0.374218	-0.828679	0.744186	0.883752
HALLMARK_G2M_CHECKPOINT	194	-0.299392	-0.784578	0.950617	0.909487
