# Supplementary material for: Sex differences in transcriptomic profiles in aged kidney cells of renin lineage
Source: Aging (Albany NY). 2018 Apr 18;10(4):606–21. doi: 10.18632/aging.101416 (PMC5940125; doi:10.18632/aging.101416)
Supplement: Supplementary Table S8 [file aging-10-101416-s008.xlsx]

## Sheet: up_aged_male
Table S8 GSEA up-regulated pathways aged male vs. young male
NAME	SIZE	ES	NES	NOM p-val	FDR q-val
HALLMARK_REACTIVE_OXIGEN_SPECIES_PATHWAY	41	0.603994	1.32909	0.123077	1
HALLMARK_PEROXISOME	94	0.546128	1.30359	0.114583	0.925318
HALLMARK_FATTY_ACID_METABOLISM	141	0.5792	1.301	0.208333	0.617909
HALLMARK_OXIDATIVE_PHOSPHORYLATION	192	0.640324	1.29048	0.255319	0.475457
HALLMARK_BILE_ACID_METABOLISM	104	0.540872	1.2354	0.139785	0.434565
HALLMARK_ALLOGRAFT_REJECTION	175	0.569823	1.22056	0.227273	0.372169
HALLMARK_MYC_TARGETS_V2	58	0.432406	1.04222	0.323944	0.544555
HALLMARK_MYC_TARGETS_V1	197	0.529555	1.01981	0.342857	0.50775
HALLMARK_IL6_JAK_STAT3_SIGNALING	82	0.385917	0.907456	0.46281	0.659754
HALLMARK_XENOBIOTIC_METABOLISM	175	0.389306	0.858748	0.452381	0.700379
HALLMARK_DNA_REPAIR	137	0.363189	0.752829	0.702128	0.880086
HALLMARK_PI3K_AKT_MTOR_SIGNALING	100	0.296271	0.705031	0.977778	0.888152
