# Supplementary material for: Sex differences in transcriptomic profiles in aged kidney cells of renin lineage
Source: Aging (Albany NY). 2018 Apr 18;10(4):606–21. doi: 10.18632/aging.101416 (PMC5940125; doi:10.18632/aging.101416)
Supplement: Supplementary Table S9 [file aging-10-101416-s009.xlsx]

## Sheet: down_in_aged_male
Table S9 GSEA down-regulated pathways aged male vs. young male
NAME	SIZE	ES	NES	NOM p-val	FDR q-val
HALLMARK_MYOGENESIS	172	-0.862203	-1.64229	0	0
HALLMARK_EPITHELIAL_MESENCHYMAL_TRANSITION	186	-0.840087	-1.61576	0	0.000404255
HALLMARK_UV_RESPONSE_DN	139	-0.784902	-1.50654	0.00105932	0.00996073
HALLMARK_NOTCH_SIGNALING	31	-0.840027	-1.4644	0.0122249	0.0222053
HALLMARK_APICAL_JUNCTION	177	-0.755842	-1.45347	0.00104058	0.022705
HALLMARK_PANCREAS_BETA_CELLS	22	-0.820079	-1.36845	0.0722892	0.106349
HALLMARK_ANGIOGENESIS	33	-0.799322	-1.3631	0.056338	0.101089
HALLMARK_WNT_BETA_CATENIN_SIGNALING	38	-0.763823	-1.34246	0.072335	0.126385
HALLMARK_HYPOXIA	186	-0.686837	-1.32678	0.0189274	0.143281
HALLMARK_TGF_BETA_SIGNALING	53	-0.722669	-1.30247	0.0807963	0.181474
HALLMARK_HEDGEHOG_SIGNALING	34	-0.748439	-1.29742	0.128788	0.175496
HALLMARK_UV_RESPONSE_UP	141	-0.672591	-1.27675	0.064143	0.206808
HALLMARK_ESTROGEN_RESPONSE_EARLY	186	-0.668882	-1.27466	0.0272537	0.195949
HALLMARK_G2M_CHECKPOINT	193	-0.649677	-1.25757	0.0494217	0.222515
HALLMARK_KRAS_SIGNALING_DN	136	-0.640494	-1.22921	0.110043	0.281612
HALLMARK_MITOTIC_SPINDLE	196	-0.633092	-1.21955	0.0895833	0.293254
HALLMARK_APOPTOSIS	150	-0.611479	-1.18188	0.165079	0.393228
HALLMARK_KRAS_SIGNALING_UP	180	-0.604405	-1.16617	0.166667	0.419551
HALLMARK_PROTEIN_SECRETION	94	-0.616009	-1.15278	0.233115	0.441516
HALLMARK_SPERMATOGENESIS	94	-0.61158	-1.1439	0.263506	0.447491
HALLMARK_COAGULATION	120	-0.583639	-1.10269	0.303359	0.564889
HALLMARK_ESTROGEN_RESPONSE_LATE	171	-0.576118	-1.09816	0.312762	0.553509
HALLMARK_P53_PATHWAY	186	-0.559611	-1.0793	0.335079	0.589364
HALLMARK_CHOLESTEROL_HOMEOSTASIS	67	-0.592145	-1.06974	0.38933	0.592695
HALLMARK_TNFA_SIGNALING_VIA_NFKB	192	-0.552118	-1.05445	0.376582	0.614774
HALLMARK_INTERFERON_ALPHA_RESPONSE	87	-0.566167	-1.05371	0.42029	0.593161
HALLMARK_GLYCOLYSIS	188	-0.539382	-1.0405	0.431393	0.609052
HALLMARK_ANDROGEN_RESPONSE	92	-0.522606	-0.978286	0.547461	0.755405
HALLMARK_APICAL_SURFACE	42	-0.525508	-0.916854	0.638197	0.879623
HALLMARK_ADIPOGENESIS	189	-0.460132	-0.887249	0.743697	0.911598
HALLMARK_INTERFERON_GAMMA_RESPONSE	183	-0.445756	-0.856184	0.807732	0.938173
HALLMARK_INFLAMMATORY_RESPONSE	182	-0.433722	-0.830567	0.834563	0.952026
HALLMARK_E2F_TARGETS	194	-0.407846	-0.783762	0.881551	0.988392
HALLMARK_IL2_STAT5_SIGNALING	188	-0.386036	-0.744273	0.935349	1
HALLMARK_COMPLEMENT	173	-0.34138	-0.659875	0.981013	1
HALLMARK_HEME_METABOLISM	174	-0.322286	-0.616913	0.986373	1
HALLMARK_MTORC1_SIGNALING	192	-0.290186	-0.556887	1	1
HALLMARK_UNFOLDED_PROTEIN_RESPONSE	112	-0.28789	-0.53985	0.997854	0.997912
